# Supplementary material for: Hugin-AstA circuitry is a novel central energy sensor that directly regulates sweet sensation in Drosophila and mouse
Source: eLife. 2026 May 5;14:RP108551. doi: 10.7554/eLife.108551 (PMC13143273; doi:10.7554/eLife.108551)
Supplement: Figure 1—figure supplement 1—source data 1. [file elife-108551-fig1-figsupp1-data1.xlsx]

## Sheet: A
	fed 200mM -1.tif	fed 200mM 001-1.tif	fed 200mM 002-1.tif	fed 200mM 003-1.tif	fed 200mM 004-1.tif	fed 200mM 005-1.tif				fed 200mM -1.tif	fed 200mM 001-1.tif	fed 200mM 002-1.tif	fed 200mM 003-1.tif	fed 200mM 004-1.tif	fed 200mM 005-1.tif						ST 200mM -1.tif	ST 200mM 001-1.tif	ST 200mM 002-1.tif	ST 200mM 003-1.tif	ST 200mM 004-1.tif	ST 200mM 006-1.tif				ST 200mM -1.tif	ST 200mM 001-1.tif	ST 200mM 002-1.tif	ST 200mM 003-1.tif	ST 200mM 004-1.tif	ST 200mM 006-1.tif						Peak
time（sec）	raw data	raw data	raw data	raw data	raw data	raw data				F/F0	F/F0	F/F0	F/F0	F/F0	F/F0	mean	SEM				raw data	raw data	raw data	raw data	raw data	raw data				F/F0	F/F0	F/F0	F/F0	F/F0	F/F0	mean	SEM				fed	ST
0	23.391	83.3126	136.236	22.4969	40.1058	57.2054				0.19256	-0.0778408	-0.0844478	-0.305118	-0.0167606	0.00548568	-0.0476869	0.0658367				22.5672	43.2918	60.8688	46.0603	46.4726	30.558				0.0105885	0.100562	0.00389201	-0.0800028	-0.160813	-0.0300926	-0.0259776	0.0362206				0.852473	0.898633
1	23.7256	89.0585	133.442	25.8302	37.0476	50.3252				0.20962	-0.0142414	-0.103223	-0.20216	-0.0917359	-0.115446	-0.0528644	0.0579201				22.3152	36.9498	63.4062	46.7057	53.8733	28.0848				-0.000696424	-0.0606636	0.0457406	-0.0671117	-0.0271739	-0.108592	-0.0364161	0.022249				0.702424	2.03874
2	25.7594	94.7447	134.95	28.571	42.7471	46.8957				0.31331	0.0486972	-0.0930942	-0.117502	0.0479939	-0.175725	0.00394657	0.0721336				22.6305	33.3116	58.0469	56.883	43.976	29.6741				0.0134231	-0.153154	-0.0426488	0.136167	-0.205896	-0.0581475	-0.0517093	0.0495742				0.534357	2.09579
3	18.094	92.0859	129.635	29.9136	40.201	50.5599				-0.0775004	0.0192679	-0.128809	-0.0760323	-0.0144267	-0.111321	-0.0648035	0.0232046				18.7429	44.4255	65.5281	54.7185	41.524	23.8482				-0.160669	0.129383	0.0807365	0.092934	-0.250173	-0.243061	-0.0584749	0.0727688				2.4398	2.9402
4	18.6466	92.8107	140.204	28.5586	39.8553	58.3863				-0.0493268	0.0272904	-0.0577815	-0.117885	-0.0229019	0.0262421	-0.0323938	0.0226057				22.1757	41.2401	65.1375	49.9031	56.6952	31.0893				-0.00694341	0.0484042	0.0742945	-0.0032476	0.023783	-0.0132292	0.0205102	0.0143039				0.449804	4.98834
5	21.094	88.0224	142.65	29.7562	35.9357	50.8598				0.0754508	-0.0257096	-0.0413409	-0.080894	-0.118995	-0.106049	-0.0495898	0.0290162				22.4548	39.4377	71.6469	50.2212	55.1884	27.183				0.00555505	0.00258368	0.181652	0.00310605	-0.00342626	-0.137215	0.00870932	0.0414042				0.712251	1.97646
6	19.1128	91.0037	135.471	22.2191	41.6957	53.8117				-0.0255581	0.00728936	-0.0895889	-0.313699	0.0222176	-0.0541646	-0.075584	0.050428				24.5375	43.9088	67.425	48.2102	51.5445	26.4777				0.0988211	0.116248	0.112022	-0.0370612	-0.0692266	-0.159601	0.0102003	0.0472024			mean	0.948519	2.48969
7	22.0526	92.4595	144.443	26.3272	42.9091	57.6618				0.124324	0.0234031	-0.0292927	-0.186809	0.0519655	0.0135077	-0.000483518	0.0426775				21.3734	42.2386	67.7969	57.8848	49.911	38.9509				-0.0428714	0.073788	0.118155	0.156177	-0.0987238	0.236297	0.0738037	0.0511649
8	19.7256	83.0859	138.661	32.4846	36.7353	53.7148				0.00568469	-0.0803501	-0.068153	0.00338047	-0.0993923	-0.0558678	-0.0491163	0.0179539				25.8902	37.6824	61.3563	51.0841	45.9795	33.2277				0.159397	-0.0420395	0.0119322	0.0203414	-0.169718	0.0546433	0.00575944	0.0444678
9	24.391	84.3263	141.43	32.0741	38.6382	53.8883				0.243544	-0.0666205	-0.0495437	-0.009299	-0.0527405	-0.0528182	0.00208704	0.0489348				21.8889	34.3328	46.4344	47.6508	49.2705	34.1875				-0.0197867	-0.127193	-0.23417	-0.0482345	-0.11029	0.0851073	-0.0757612	0.0442344
10	18.2519	95.4122	139.074	27.9537	35.7291	55.5615				-0.06945	0.0560856	-0.0653748	-0.136569	-0.12406	-0.0234088	-0.060463	0.0288087				28.6744	38.3815	60.1656	51.7258	39.1986	28.9866				0.284077	-0.024267	-0.00770567	0.0331586	-0.292165	-0.0799687	-0.0144785	0.0759265
11	17.0376	89.0585	145.826	32.1389	41.4818	56.3284				-0.13136	-0.0142414	-0.0200018	-0.00729747	0.0169736	-0.00992914	-0.0276426	0.0213803				26.0827	34.5243	63.3	47.9378	41.6164	30.0848				0.168017	-0.122325	0.0439891	-0.042502	-0.248505	-0.0451119	-0.0410729	0.0579087
12	16.0977	89.391	138.992	36.0864	40.7087	63.1964				-0.179279	-0.0105611	-0.0659293	0.114632	-0.00197984	0.110788	-0.00538814	0.0454032				24.3127	39.3708	55.2969	43.5996	52.9384	30.0938				0.0887542	0.000882947	-0.0880038	-0.129152	-0.044056	-0.0448263	-0.0360668	0.0307942			P value	0.0373
13	15.9962	93.3948	141.067	38.3981	41.0996	57.1923				-0.184454	0.0337556	-0.0519825	0.186036	0.00760352	0.00525542	-0.000631006	0.049179				26.3798	36.7143	73.6125	53.9653	54.7877	26.692				0.181322	-0.0666505	0.21407	0.0778898	-0.010662	-0.152799	0.0405284	0.058543			95% confidence interval	0.1105 to 2.972
14	19.891	90.4259	142.827	31.5525	39.6228	57.2274				0.0141174	0.000893887	-0.0401561	-0.0254101	-0.0286019	0.00587237	-0.0122141	0.00897355				22.9393	37.9498	76.3969	43.1755	54.7226	23.3884				0.0272516	-0.0352417	0.259993	-0.137623	-0.0118375	-0.257655	-0.0258522	0.0709547			F, DFn, Dfd	3.466, 5, 5
15	13.5526	90.7833	147.531	33.5	35.2585	60.3415				-0.309038	0.00484983	-0.00854297	0.034744	-0.135598	0.0606082	-0.0588294	0.0571847				20.8773	40.4894	63.4844	39.4351	49.7431	34.4777				-0.0650874	0.02932	0.0470304	-0.212333	-0.101756	0.0943182	-0.0347513	0.0463312
16	21.7782	98.34	131.801	32.2623	44.0458	54.0636				0.110334	0.0884924	-0.114253	-0.0034859	0.079833	-0.049737	0.0185305	0.0364496				23.1214	39.2994	64.95	47.3144	57.1884	32.4062				0.0354063	-0.000932181	0.0712021	-0.0549537	0.0326891	0.028569	0.0186634	0.0174537
17	13.7632	95.3151	149.213	40.1975	40.6865	63.0782				-0.298301	0.0550108	0.002764	0.241616	-0.0025241	0.10871	0.0178793	0.0730985				18.5659	39.9878	68.6687	53.7623	43.0377	36.8036				-0.168595	0.0165683	0.132534	0.0738351	-0.22284	0.168142	-5.9254e-05	0.065738
18	14.3835	100.28	147.114	41.4167	36.833	56.5224				-0.266676	0.109968	-0.011342	0.279274	-0.096997	-0.00651925	0.00128469	0.0754481				21.6473	33.5957	57.975	48.298	50.4623	36.8393				-0.0306059	-0.145931	-0.0438346	-0.0353075	-0.0887686	0.169275	-0.0291955	0.0435203
19	18.9549	94.8518	151.903	27.9383	42.4341	53.0636				-0.0336085	0.0498827	0.0208397	-0.137045	0.0403203	-0.0673138	-0.0211541	0.0296116				23.9742	45.6277	53.0969	51.0658	49.3596	28.3125				0.0735957	0.159946	-0.124288	0.0199759	-0.108681	-0.101365	-0.0134693	0.0475546
20	20.9135	91.4184	139.721	32.0833	41.12	53.9462				0.0662483	0.0118795	-0.0610308	-0.00901483	0.00810365	-0.0518005	-0.00593578	0.0190382				23.7959	39.9711	51.7188	41.7477	65.4795	37.683				0.0656112	0.0161438	-0.147016	-0.166142	0.182407	0.196054	0.0245097	0.063741
21	26.3045	81.3462	154.867	29.9877	41.4434	60.8737				0.341102	-0.0996063	0.0407581	-0.0737435	0.0160322	0.0699625	0.0490841	0.0643084				19.4083	41.8359	53.175	66.6143	43.5788	24.8393				-0.130871	0.0635506	-0.123	0.330538	-0.213069	-0.211604	-0.0474091	0.0860695
22	21.5075	76.2914	162.288	28.0741	38.2004	53.793				0.0965326	-0.155556	0.090627	-0.132851	-0.0634737	-0.0544933	-0.0365357	0.044109				20.6731	43.9438	61.3625	50.6435	53.5753	30.1741				-0.0742318	0.117138	0.0120345	0.011541	-0.0325551	-0.0422776	-0.00139191	0.0272918
23	18.297	85.4147	170.66	29.4846	42.5615	51.5672				-0.0671507	-0.0545734	0.146891	-0.0892832	0.0434437	-0.0936156	-0.019048	0.0389488				23.5698	44.6018	59.6031	52.3272	57.5719	36.0045				0.0554862	0.133865	-0.0169828	0.0451708	0.0396142	0.142779	0.0666554	0.0249164
24	15.3835	95.7223	157.497	30.8889	43.0087	53.8085				-0.215692	0.059518	0.0584319	-0.0459073	0.0544073	-0.0542208	-0.0239105	0.0439912				19.27	40.7462	69.0125	56.9762	53.9247	41.0268				-0.137064	0.0358483	0.138204	0.138029	-0.0262457	0.302186	0.0751594	0.0622724
25	18.2782	85.8207	159.054	33.3179	40.5745	50.4336				-0.0681092	-0.0500795	0.0688934	0.0291193	-0.00526991	-0.113541	-0.0231644	0.0273501				24.4212	33.7143	53.6031	48.83	51.8219	25.0982				0.093613	-0.142916	-0.115939	-0.0246814	-0.0642174	-0.203386	-0.0762546	0.0423638
26	21.1692	93.5143	157.709	33.5802	38.7706	59.1125				0.0792848	0.0350783	0.0598593	0.0372212	-0.0494946	0.0390063	0.0334926	0.0180054				23.8553	40.7872	55.3906	54.9909	52.7329	32.0268				0.0682713	0.0368906	-0.0864584	0.0983749	-0.0477669	0.0165269	0.0143064	0.0285782
27	14.2594	88.0187	165.64	35.0679	40.363	52.0098				-0.273003	-0.0257506	0.113158	0.0831731	-0.0104551	-0.0858361	-0.0331189	0.0565131				20.6977	39.8237	70.7594	46.9031	47.9281	36.7679				-0.0731302	0.0123966	0.167015	-0.0631689	-0.13453	0.167009	0.0125985	0.0524163
28	17.0451	95.3761	160.707	32.6605	36.9116	53.0701				-0.130977	0.055686	0.0800062	0.00881365	-0.0950701	-0.0671995	-0.0247902	0.0349292				24.6137	36.7173	57.975	49.3327	53.9144	26.0446				0.102233	-0.0665742	-0.0438346	-0.0146406	-0.0264317	-0.173347	-0.0370992	0.0362903
29	20.8947	98.7335	156.25	30.6265	41.5665	56.6064				0.0652898	0.0928479	0.0500557	-0.0540123	0.0190501	-0.0050428	0.0280314	0.0215872				19.8127	41.6535	59.3063	42.7075	49.911	26.5179				-0.112762	0.0589137	-0.0218779	-0.146971	-0.0987238	-0.158325	-0.0799576	0.0340191
30	24.3308	96.9602	160.938	34.5988	43.6011	54.1247				0.240475	0.0732199	0.0815579	0.0686836	0.0689306	-0.0486631	0.0807007	0.037684				20.2196	39.348	70.3781	50.5887	55.9178	32.4688				-0.0945401	0.000303326	0.160726	0.0104464	0.009745	0.0305559	0.0195395	0.0334753
31	22.7932	94.5006	163.266	26.9506	38.8695	54.2999				0.162082	0.0459954	0.0972022	-0.167553	-0.0470699	-0.0455836	0.00751222	0.0482574				21.3424	38.9863	68.0031	48.7642	77.6712	23.6205				-0.0442597	-0.0088918	0.121556	-0.0259957	0.402561	-0.250288	0.0324469	0.0886702
32	21.9286	92.3611	161.316	37.3981	46.1156	49.0293				0.118002	0.022314	0.0841009	0.155148	0.130576	-0.138224	0.0619863	0.0442223				22.4935	35.1155	71.1594	50.958	62.8082	32.2188				0.00728808	-0.107295	0.173612	0.0178227	0.13417	0.022621	0.0413697	0.0409343
33	13.3383	98.0486	166.339	36.7562	42.5659	56.1483				-0.319964	0.085267	0.117855	0.135321	0.0435515	-0.0130947	0.00815606	0.069166				18.1344	38.117	65.2688	51.5667	47.25	33.558				-0.187918	-0.0309911	0.07646	0.0299807	-0.146775	0.065127	-0.0323528	0.0456519
34	18.0564	86.6476	169.827	31.5494	40.88	59.9967				-0.0794174	-0.0409268	0.141293	-0.0255059	0.00221977	0.0545477	0.00870172	0.0322089				20.5633	40.0897	56.7562	55.0567	43.2192	25.2991				-0.0791488	0.0191588	-0.0639359	0.0996892	-0.219562	-0.19701	-0.0734681	0.0500973
35	22.7895	83.0274	153.657	27.0741	39.4298	57.0277				0.161894	-0.0809976	0.0326245	-0.163738	-0.0333335	0.00236229	-0.0135315	0.0449677				23.3282	39.2067	52.3688	45.3547	53	32.5223				0.044667	-0.0032888	-0.136296	-0.0940962	-0.0429437	0.032254	-0.033284	0.0292542
36	18.9925	96.0473	152.787	38.6636	45.2727	54.1165				-0.0316915	0.0631153	0.0267771	0.194237	0.109912	-0.0488072	0.052257	0.037198				23.3463	32.8222	49.8625	52.0165	62.0137	30.25				0.0454776	-0.165595	-0.177632	0.0389649	0.119823	-0.0398685	-0.0298051	0.049389
37	15.8722	108.237	144.96	29.9043	42.5213	54.3521				-0.190776	0.198035	-0.0258216	-0.0763195	0.0424581	-0.0446661	-0.0161818	0.0530193				24.7377	41.3951	54.725	51.8556	63.0856	29.0982				0.107786	0.0523446	-0.097436	0.0357512	0.139179	-0.0764265	0.0268664	0.0391623
38	25.5489	97.6613	140.997	32.4506	41.5096	59.7954				0.302578	0.0809801	-0.0524536	0.00233028	0.0176551	0.0510095	0.0670166	0.0506078				22.854	36.1824	58.1719	54.0128	60.3973	34.5045				0.0234317	-0.0801724	-0.0405872	0.0788385	0.0906343	0.0951688	0.0278856	0.0302465
39	22.312	92.2839	147.755	31.321	44.4205	54.9756				0.137549	0.0214595	-0.00703963	-0.0325607	0.0890192	-0.033707	0.0291201	0.0285556				22.1059	40.8283	62.9625	50.5411	51.4452	34.2723				-0.0100691	0.0379355	0.0384228	0.00949566	-0.0710197	0.0877988	0.0154273	0.0219328
40	12.3985	103.482	161.626	27.7778	41.9153	60.5208				-0.367878	0.145406	0.0861795	-0.142003	0.0276013	0.0637597	-0.0311557	0.0781179				25.1176	42.7827	51.8031	49.8282	59.8288	32.9955				0.124799	0.0876201	-0.145626	-0.00474363	0.0803685	0.0472733	0.0316152	0.0396561
41	18.1504	93.7435	136.685	42.713	41.2214	57.7726				-0.0746249	0.0376153	-0.0814344	0.319314	0.0105896	0.0154552	0.0378191	0.0598181				23.3191	39.8146	65.9313	50.0366	49.5205	29.9643				0.0442595	0.0121652	0.0873864	-0.000581103	-0.105775	-0.0489366	-0.00191365	0.0278716
42	21.718	94.1544	151.072	31.8981	39.5096	55.0823				0.107265	0.0421634	0.0152558	-0.0147353	-0.0313771	-0.0318315	0.0144566	0.0219675				20.376	36.6231	54.3625	55.0329	70.0034	30.6473				-0.0875363	-0.068969	-0.103415	0.0992138	0.264098	-0.0272583	0.012689	0.0584471
43	16.985	88.4545	139.879	44.4105	41.3438	63.3847				-0.134041	-0.0209269	-0.0599636	0.371746	0.0135904	0.114098	0.0474171	0.0730088				16.7468	33.3556	51.8219	56.3144	57.274	35.6518				-0.250057	-0.152035	-0.145316	0.12481	0.0342348	0.131584	-0.0427965	0.0657861
44	19.6842	97.0398	159.208	40.929	43.6221	66.784				0.00357396	0.0741009	0.0699331	0.26421	0.0694455	0.173846	0.109185	0.0381743				21.4328	43.4818	61.0719	48.5667	61.1404	33.9732				-0.0402114	0.105393	0.00724168	-0.0299405	0.104053	0.0783054	0.0374735	0.027207
45	22.6353	81.5629	142.43	34.5031	41.1818	61.5249				0.154032	-0.0972077	-0.0428234	0.0657277	0.00961874	0.0814085	0.0284593	0.0370538				24.7403	42.7295	70.6	48.6526	53.4315	30.808				0.107903	0.0862677	0.164386	-0.0282248	-0.0351518	-0.0221577	0.0455037	0.0347407
46	18.8797	81.213	151.708	33.5093	41.4218	57.9413				-0.0374425	-0.101081	0.0195306	0.0350313	0.0155026	0.0184204	-0.0083397	0.0211268				19.1757	41.8009	66.0719	49.5119	57.7877	34.2768				-0.141287	0.0626609	0.0897053	-0.0110613	0.043511	0.0879416	0.0219117	0.0359648
47	13.1842	85.1905	141.65	29.6327	40.3111	56.6756				-0.32782	-0.057055	-0.0480612	-0.0847087	-0.0117275	-0.00382649	-0.0888665	0.0493205				22.5504	40.0836	63.5219	47.3638	62.8938	23.442				0.00983614	0.0190037	0.0476488	-0.053967	0.135715	-0.255954	-0.0162861	0.0541542
48	25.0526	85.8917	154.429	26.571	39.3531	62.6406				0.277275	-0.0492936	0.0378139	-0.179278	-0.0352139	0.101019	0.025387	0.0633666				23.4005	43.4696	79.3219	54.0475	54.4384	41.0759				0.0479047	0.105082	0.308234	0.0795316	-0.0169695	0.303744	0.137921	0.0557032
49	13.8835	85.7198	143.698	35.6451	40.4972	56.0848				-0.292167	-0.0511964	-0.034302	0.101002	-0.00716501	-0.0142108	-0.0496733	0.0531694				22.6563	43.079	54.0625	44.1079	61.3664	36				0.0145785	0.0951527	-0.108362	-0.119	0.108134	0.142636	0.0221898	0.0462794
50	22.1429	87.5928	140.432	34.1944	42.914	59.5126				0.128928	-0.0304647	-0.05625	0.0561926	0.0520856	0.0460388	0.032755	0.0272441				22.0917	41.6125	51.6406	47.7422	76.9212	41.0089				-0.010705	0.0578714	-0.148306	-0.0464089	0.389017	0.301618	0.0905144	0.0857832
51	19.1579	93.0299	142.947	29.8488	39.8782	57.1809				-0.0232588	0.0297167	-0.0393456	-0.0780338	-0.0223405	0.00505505	-0.0213678	0.0151069				21.7739	35.2492	49.0031	54.808	60.4075	30.1562				-0.0249365	-0.103896	-0.191806	0.0947217	0.0908185	-0.0428457	-0.0296573	0.0454548
52	22.6316	94.5965	142.629	37.7407	43.1342	60.2967				0.153843	0.0470569	-0.041486	0.16573	0.0574841	0.0598207	0.0737415	0.0312654				22.8475	37.2249	45.8187	59.7112	60.0514	27.7411				0.0231407	-0.05367	-0.244325	0.192657	0.0843882	-0.119501	-0.0195517	0.0630702
53	19.4098	88.5679	138.041	32.2623	42.7464	62.7319				-0.010416	-0.0196717	-0.0723169	-0.0034859	0.0479767	0.102624	0.00745164	0.024656				19.3992	37.6353	52.1375	43.2633	51.2123	30.4732				-0.131279	-0.0432369	-0.140111	-0.135869	-0.0752254	-0.0327842	-0.0930842	0.0199505
54	16.2256	86.3773	145.581	32.5957	37.3729	60.2779				-0.172758	-0.0439187	-0.0216443	0.00681212	-0.0837608	0.0594903	-0.04263	0.0326294				19.0866	44.3419	62.9781	49.766	71.1027	38.1339				-0.145277	0.127258	0.0386801	-0.005986	0.283949	0.210366	0.0848315	0.0633862
55	24.9248	83.7136	155.459	29.6821	39.0266	60.7294				0.270759	-0.0734023	0.0447352	-0.0831828	-0.0432184	0.0674262	0.0305195	0.0542969				22.8088	40.4742	50.7	49.2852	71.2329	31.0893				0.0214076	0.0289335	-0.163819	-0.0155894	0.2863	-0.0132292	0.0240006	0.0597388
56	22.6165	77.9751	154.475	30.6698	40.2548	59.304				0.153074	-0.13692	0.0381257	-0.0526749	-0.0131077	0.0423723	0.00514486	0.0400896				25.2313	39.2781	56.9281	44.5192	59.1952	25.692				0.12989	-0.00147367	-0.0611009	-0.110784	0.0689272	-0.184539	-0.0265134	0.0474229
57	23.9135	76.9278	153.907	37.2531	46.0588	55.3309				0.219199	-0.148512	0.0343079	0.150669	0.129184	-0.027462	0.0595644	0.0548141				20.3811	38.5046	62.4844	45.2633	61.8527	32.5893				-0.0873079	-0.0211376	0.0305376	-0.0959218	0.116915	0.0343806	-0.00375561	0.033151
58	16.9286	82.8257	147.42	31.3889	42.9901	66.9739				-0.136917	-0.0832302	-0.00929094	-0.0304634	0.0539513	0.177184	-0.00479429	0.0450388				21.4018	36.1945	56.2719	46.0183	61.1336	34.3571				-0.0415997	-0.0798648	-0.0719234	-0.0808417	0.10393	0.0904904	-0.0133015	0.035471
59	20.609	87.056	166.144	37.1698	39.1373	63.8769				0.0507237	-0.0364064	0.116545	0.148096	-0.0405045	0.122749	0.0602006	0.0338511				24.9134	33.7827	65.2812	48.713	67.1575	34.9286				0.115654	-0.141178	0.0766645	-0.0270184	0.212708	0.10863	0.0575767	0.050685
60	16.0338	82.477	156.143	37.4475	39.2103	62.6308				-0.182537	-0.0870898	0.0493352	0.156674	-0.0387148	0.100847	-0.000247645	0.0514955				17.7791	34.1353	63.2625	49.1846	71.3904	27.6696				-0.203829	-0.132214	0.0433706	-0.0175987	0.289144	-0.12177	-0.0238161	0.072168
61	20.9286	84.3624	142.467	84.466	43.2851	78.5615				0.0670181	-0.066221	-0.0425741	1.60898	0.0611835	0.380857	0.334873	0.263024				21.8734	41.1869	90.9156	49.1408	162.281	40.9018				-0.0204808	0.0470518	0.499445	-0.0184736	1.93041	0.298218	0.456029	0.306598
62	23.6955	89.797	228.315	111.364	46.7477	73.7563				0.208085	-0.0060672	0.534357	2.4398	0.146073	0.296397	0.603108	0.374534				18.3953	53.3267	100.953	64.7294	237	51.4018				-0.176235	0.355669	0.664991	0.292889	3.27967	0.631487	0.841412	0.503081
63	31.4211	150.463	149.426	92.3457	50.4366	83.8101				0.601965	0.665428	0.00419139	1.85236	0.236511	0.47311	0.638928	0.262477				26.3463	81.6641	122.362	65.6106	228.206	52.7411				0.179821	1.07606	1.01809	0.31049	3.12086	0.673996	1.06322	0.43721
64	23.9436	153.121	184.714	78.142	59.1367	97.4156				0.220734	0.694843	0.241343	1.41364	0.449804	0.712251	0.622102	0.180343				36.9612	86.6459	140.422	70.1609	331.623	61.7991				0.65517	1.20271	1.31594	0.401377	4.98834	0.961496	1.58751	0.694155
65	36.3346	153.806	175.127	58.0772	48.9852	92.6487				0.852473	0.702424	0.176911	0.793882	0.200928	0.628464	0.55918	0.12123				42.3979	110.769	165.103	68.4607	265.839	68.4241				0.898633	1.81597	1.723	0.367417	3.80043	1.17177	1.62954	0.486244
66	34.5376	145.296	177.873	53.3241	43.2715	77.0905				0.760856	0.608237	0.195367	0.647068	0.0608501	0.355001	0.437897	0.113274				31.1512	104.223	147.816	77.0841	216.616	57.3571				0.394991	1.64956	1.43788	0.539659	2.91159	0.820508	1.29236	0.381451
67	29.8383	152.89	190.037	50.3951	46.1911	70.511				0.521268	0.692292	0.277113	0.556598	0.132427	0.239355	0.403176	0.0889019				34.2326	100.22	152.094	134.517	185.993	65.9286				0.53298	1.5478	1.50844	1.68682	2.3586	1.09257	1.45453	0.249211
68	24.0489	116.167	153.333	70.1358	45.3086	68.1394				0.226103	0.285812	0.0304491	1.16635	0.110792	0.19767	0.336195	0.170028				34.5543	96.1353	170.225	197.269	193.637	82.7411				0.547386	1.44395	1.80747	2.9402	2.49663	1.62619	1.8103	0.342091
69	26.0827	114.462	172.134	73.8148	47.538	68.5599				0.329793	0.266941	0.156798	1.27998	0.165448	0.205061	0.400671	0.177873				28.1796	95.5912	187.706	174.768	160.113	87.0982				0.261919	1.43012	2.09579	2.49077	1.89127	1.76449	1.65572	0.31368
70	20.3195	101.151	166.956	62.0401	42.7044	55.8647				0.0359639	0.119603	0.121998	0.916287	0.046947	-0.0180795	0.203787	0.144155				22.0879	93.3207	172.25	133.426	176.914	93.7768				-0.0108752	1.3724	1.84087	1.66502	2.19466	1.97646	1.50642	0.324128
71	24.2744	95.4956	147.309	70.0185	38.9839	63.454				0.237599	0.0570087	-0.0100322	1.16272	-0.0442653	0.115316	0.253058	0.186436				24.8501	119.532	169.062	125.278	128	71.4955				0.11282	2.03874	1.7883	1.50227	1.31138	1.26926	1.33713	0.272475
72	27.2519	94.9427	148.767	70.2191	38.2424	58.8859				0.389404	0.0508888	-0.000235962	1.16892	-0.062444	0.0350234	0.263593	0.192253				24.2028	103.193	163.622	134.358	135.181	58.6473				0.0838328	1.62337	1.69857	1.68364	1.44106	0.861458	1.23199	0.262941
73	23.2256	106.671	122.673	70.0432	35.6092	62.4189				0.184128	0.180708	-0.175595	1.16349	-0.127	0.0971221	0.220475	0.198746				24.2171	116.388	145.522	106.018	95.4075	56.9688				0.0844731	1.9588	1.40005	1.11758	0.722837	0.808183	1.01532	0.260995
74	24.594	89.8929	161.366	90.2932	40.2845	66.3513				0.253894	-0.00500571	0.0844335	1.78897	-0.0123796	0.166241	0.379358	0.284975				23.5866	115.246	174.834	86.5101	92.4658	50.125				0.0562385	1.92978	1.88349	0.727932	0.669717	0.590962	0.976355	0.30999
75	22.9098	89.5965	142.94	67.3858	33.5158	64.4735				0.168027	-0.00828646	-0.039394	1.0814	-0.178322	0.133235	0.192777	0.18492				21.4574	97.614	131.547	102.133	75.5514	47.3125				-0.0391098	1.48154	1.16957	1.03999	0.364282	0.501693	0.752993	0.232977
76	19.7256	95.4707	142.768	56.4352	38.4626	63.6422				0.00568469	0.0567331	-0.0405513	0.743164	-0.0570455	0.118624	0.137768	0.123913				20.3333	92.0471	127.216	121.466	92.4041	48.8973				-0.0894485	1.34002	1.09813	1.42614	0.668602	0.551995	0.832572	0.233529
77	21.1165	82.604	148.569	64.7377	35.0414	56.229				0.076598	-0.0856841	-0.00156592	0.99961	-0.14092	-0.0116763	0.139394	0.174723				23.0543	84.076	97.1344	111.645	100.897	35.7589				0.0324014	1.13738	0.60201	1.22998	0.82197	0.134983	0.659786	0.204278
78	12.3233	82.3973	146.51	60.8673	38.5615	61.6553				-0.371712	-0.087972	-0.0154017	0.880062	-0.0546209	0.0837005	0.0723426	0.173132				24.5078	79.4271	86.8187	118.172	71.7329	32.5625				0.097491	1.01919	0.431876	1.36033	0.295329	0.03353	0.539626	0.218056
79	17.0376	97.802	159.37	61.0988	39.6803	62.7848				-0.13136	0.0825375	0.0710204	0.887212	-0.0271922	0.103553	0.164295	0.14897				19.7571	77.3799	73.6625	102.958	67.1438	35.933				-0.115251	0.967149	0.214895	1.05646	0.21246	0.140509	0.412703	0.196119
80	18.3835	89.4022	126.86	56.7685	38.8157	50.1312				-0.0627406	-0.0104371	-0.14746	0.753459	-0.0483889	-0.118856	0.0609294	0.139962				20.6886	71.0729	71.6156	102.154	67.7021	31.7545				-0.0735377	0.806813	0.181136	1.04039	0.222542	0.00788413	0.364205	0.184869
81	21.0226	84.3288	154.956	84.0185	38.4261	54.7376				0.0718106	-0.0665929	0.0413542	1.59515	-0.0579404	-0.0378903	0.257649	0.268472				19.1848	78.5821	61.6688	107.005	65.2192	27.7411				-0.14088	0.997711	0.0170862	1.1373	0.177707	-0.119501	0.344904	0.233889
82	17.7331	82.7646	151.478	80.9691	40.0686	57.1434				-0.0959004	-0.0839065	0.0179849	1.50096	-0.0176726	0.00439592	0.220978	0.256697				20.9767	75.8131	61.4031	83.5558	68.0514	36.4732				-0.0606362	0.927318	0.0127041	0.668923	0.22885	0.157655	0.322469	0.159638
83	16.6955	81.1009	147.806	75.1142	38.316	54.5477				-0.148801	-0.102321	-0.00669286	1.32012	-0.0606396	-0.0412281	0.160073	0.232881				19.0814	80.7827	65.2094	89.5704	55.5651	31.3125				-0.14551	1.05365	0.0754803	0.789057	0.00337606	-0.00614489	0.294986	0.203111
84	22.8571	87.2466	150.068	74.284	34.4168	62.176				0.16534	-0.0342967	0.00850719	1.29448	-0.156233	0.0928527	0.228441	0.217882				16.8359	67.6429	74.2219	75.9506	80.8322	20.442				-0.246067	0.719615	0.224121	0.517019	0.459641	-0.351173	0.220526	0.176893
85	19.1391	74.2603	147.501	75.287	36.1435	52.617				-0.0242173	-0.178038	-0.00874391	1.32546	-0.113901	-0.0751635	0.154232	0.235591				18.7248	72.2036	56.5812	82.2121	64.9726	35.3616				-0.161479	0.835557	-0.0668222	0.642085	0.173254	0.122373	0.257494	0.162084
86	12.985	99.6413	157.437	74.4198	34.5714	52.229				-0.337976	0.102896	0.05803	1.29867	-0.152443	-0.0819833	0.147866	0.238991				23.2765	73.1383	58.7125	101.433	56.3459	27.4196				0.0423518	0.859319	-0.0316712	1.026	0.0174755	-0.129705	0.297296	0.206618
87	15.2632	93.1469	145.848	67.8981	40.0451	56.1337				-0.221825	0.0310117	-0.0198499	1.09723	-0.0182488	-0.0133513	0.142494	0.19435				22.5439	82.0486	54.9188	107.76	66.8082	26.6964				0.00954506	1.08584	-0.0942397	1.15238	0.2064	-0.152659	0.367877	0.242892
88	11.3647	92.3425	160.105	66.0062	37.5015	52.0122				-0.420585	0.0221081	0.0759599	1.03879	-0.080608	-0.085794	0.0916454	0.202131				20.3475	71.8207	46.5469	116.91	78.0959	41.1786				-0.0888126	0.825823	-0.232315	1.33514	0.41023	0.307004	0.426178	0.237993
89	22.3647	88.1457	136.016	61.6265	36.1361	53.5379				0.140236	-0.0243449	-0.0859303	0.903512	-0.114082	-0.0589771	0.126736	0.159593				15.646	72.4757	61.2156	97.9616	61.0856	35.0312				-0.299352	0.842474	0.00961168	0.956661	0.103063	0.111886	0.287391	0.20349
90	14.2143	85.5841	146.231	69.7377	33.9388	57.6699				-0.275302	-0.0526984	-0.0172794	1.15405	-0.167952	0.0136501	0.109078	0.213518				15.6331	82.2325	71.8469	98.5832	61.2671	35.4777				-0.29993	1.09051	0.184951	0.969077	0.106341	0.126058	0.362835	0.222845
91	14.8158	82.6115	142.149	63.7778	40.102	58.6202				-0.244635	-0.0856011	-0.0447145	0.969961	-0.0168538	0.0303533	0.101418	0.177903				17.7455	77.4301	88.0437	90.702	62.6507	38.442				-0.205334	0.968425	0.45208	0.81166	0.131325	0.220145	0.396384	0.179459
92	19.0338	86.3026	152.693	63.8488	32.807	54.771				-0.0295859	-0.0447455	0.0261467	0.972154	-0.195699	-0.0373032	0.115161	0.174046				18.6744	74.2447	59.0906	96.7569	62.2979	33.1607				-0.163736	0.887446	-0.0254353	0.932599	0.124955	0.0525168	0.301391	0.196478
93	18.1316	90.9066	142.594	59.0957	36.906	54.7311				-0.0755834	0.00621459	-0.0417219	0.825341	-0.0952074	-0.0380045	0.0968397	0.146392				16.8811	70.8328	79.375	93.5667	63.8356	35.5625				-0.244042	0.800709	0.30911	0.868879	0.152722	0.12875	0.336021	0.174512
94	21.515	82.7933	159.132	55.2685	37.4583	51.8297				0.096915	-0.0835888	0.0694203	0.707127	-0.0816671	-0.0890017	0.103201	0.125421				15.8165	84.3207	73.3906	86.5612	61.1747	37.9062				-0.291717	1.1436	0.210411	0.728952	0.104672	0.203138	0.349842	0.207078
95	19.9098	90.0498	139.921	50.5154	38.2913	53.9332				0.0150759	-0.00326904	-0.0596867	0.560314	-0.0612452	-0.052029	0.0665266	0.0996084				20.6641	80.2432	66.4344	89.6801	57.6541	44.5223				-0.0746348	1.03994	0.0956839	0.791249	0.0410985	0.413133	0.384411	0.183304
96	21.7707	79.665	146.321	57.2531	34.115	58.7351				0.109952	-0.118215	-0.0166766	0.768427	-0.163632	0.0323729	0.102038	0.139305				18.8811	83.5456	63.0531	95.7258	66.8733	37.6384				-0.15448	1.12389	0.0399171	0.912004	0.207576	0.194638	0.387258	0.208287
97	23.2669	80.3263	134.653	58.7747	31.7941	57.5167				0.186233	-0.110895	-0.0950895	0.815426	-0.220531	0.0109573	0.0976834	0.154104				21.6886	86.0471	41.475	82.8483	70.1541	35				-0.0287564	1.18749	-0.315964	0.654792	0.266819	0.110896	0.312545	0.218854
98	21.8835	83.6451	145.516	56.4537	28.4224	65.6129				0.115702	-0.0741605	-0.0220871	0.743735	-0.303192	0.153262	0.10221	0.144366				22.1654	78.1505	51.525	87.4241	73.6575	32.7991				-0.00740466	0.986739	-0.150213	0.746188	0.330083	0.0410396	0.324405	0.185497
99	15.4173	83.0386	156.048	53.0926	34.4335	66.0179				-0.213969	-0.0808737	0.0486975	0.639918	-0.155824	0.160381	0.0663884	0.127508				20.0995	97.2158	54.525	90.2541	55.2363	32.7232				-0.0999183	1.47142	-0.100735	0.802713	-0.0025613	0.0386306	0.351591	0.263903
100	17.1053	75.071	172.102	57.9475	31.5374	60.727				-0.127908	-0.169064	0.156584	0.789876	-0.226825	0.067384	0.0816744	0.153767				20.2455	72.3845	54.0625	92.0146	70.9931	40.0357				-0.0933803	0.840156	-0.108362	0.837877	0.28197	0.270728	0.338165	0.172726
101	16.0113	75.467	176.302	63.0278	33.026	60.4686				-0.183684	-0.164681	0.184809	0.946795	-0.19033	0.0628422	0.109292	0.17888				20.562	83.8313	57.2438	87.245	55.0103	36.808				-0.079207	1.13116	-0.0558941	0.74261	-0.00664233	0.168282	0.316717	0.205498
102	18.3947	70.0012	180.491	64.5741	36.7508	68.8134				-0.0621696	-0.22518	0.212958	0.994557	-0.0990123	0.209517	0.171778	0.179418				22.5426	78.6839	53.7719	94.2322	61.3082	30.2188				0.00948684	1.0003	-0.113155	0.882171	0.107083	-0.0408588	0.307504	0.203101
103	19.812	78.2217	171.059	62.5988	37.9876	59.4442				0.0100897	-0.13419	0.149572	0.933544	-0.0686907	0.0448365	0.15586	0.160516				19.9729	68.655	57.5781	101.629	65.4144	32.4375				-0.105588	0.745345	-0.0503806	1.02991	0.181231	0.0295625	0.305014	0.19196
104	26.2556	73.6052	177.959	47.3704	34.1441	61.1353				0.338608	-0.185289	0.195943	0.463171	-0.162918	0.0745606	0.120679	0.107491				17.9651	71.0304	33.9469	93.3565	50.887	23.6116				-0.1955	0.805732	-0.440123	0.86468	-0.0810995	-0.250571	0.117187	0.232075
105	20.8985	74.2304	200.014	59.3796	35.5127	59.3276				0.0654835	-0.178369	0.344164	0.83411	-0.129366	0.0427871	0.163135	0.153751				21.8953	57.696	48.1562	100.029	48.7911	28.9688				-0.0195001	0.466745	-0.205773	0.997961	-0.118947	-0.0805337	0.173325	0.191214
106	24.4474	79.9103	203.482	48.2284	38.3525	63.1125				0.24642	-0.1155	0.367471	0.489673	-0.0597448	0.109313	0.172939	0.0974593				22.0685	70.8404	49.8563	85.6545	60.7397	27.692				-0.011744	0.800902	-0.177734	0.710842	0.0968173	-0.121059	0.216337	0.175279
107	21.5865	72.8954	217.957	42.3765	37.4657	61.4996				0.10056	-0.193145	0.464742	0.30892	-0.0814857	0.0809638	0.113426	0.0991357				22.7868	61.7553	51.7781	88.4059	59.2911	35.9643				0.0204224	0.569941	-0.146038	0.765798	0.0706589	0.141503	0.237047	0.143862
108	15.9286	67.8443	229.2	53.3796	41.0507	66				-0.187901	-0.249054	0.540301	0.648783	0.00640468	0.160066	0.1531	0.152228				20.0336	56.8252	57.625	89.1865	61.0103	35.0357				-0.102869	0.444608	-0.0496071	0.781389	0.101704	0.112029	0.214542	0.1376
109	22.5338	75.0922	250.233	49.0154	33.6141	67.8941				0.148857	-0.16883	0.68165	0.513982	-0.175912	0.193358	0.198851	0.142661				19.7661	74.4559	54.25	77.5612	61.3322	31.7902				-0.114848	0.892815	-0.10527	0.549189	0.107516	0.00901725	0.22307	0.166941
110	19.3083	69.7559	234.823	51.8086	33.2393	59.3651				-0.0155908	-0.227895	0.578087	0.600258	-0.185101	0.0434462	0.132201	0.150329				21.4406	59.8921	70.7844	73.6892	59.9075	40.6473				-0.0398621	0.522575	0.167427	0.47185	0.0817897	0.290141	0.248987	0.0902317
111	13.203	73.335	252.213	53.4568	35.2282	59.2111				-0.326862	-0.18828	0.694958	0.651167	-0.136341	0.0407394	0.122564	0.180683				16.5956	65.0456	67.4844	82.5283	65.1267	31.6696				-0.256828	0.653587	0.113001	0.6484	0.176036	0.00518942	0.223231	0.148139
112	19.594	74.1009	251.315	44.8488	36.7013	62.1451				-0.00102477	-0.179802	0.688924	0.385284	-0.100226	0.0923096	0.147578	0.134571				15.6744	65.5942	78.3031	94.6453	49.0171	29.933				-0.29808	0.667533	0.291431	0.890422	-0.114866	-0.0499301	0.231085	0.192139
113	21.8383	75.8618	275.84	39.9846	40.227	64.5322				0.113398	-0.160311	0.853738	0.23504	-0.0137893	0.134267	0.193724	0.143262				21.2416	75.1033	64.0531	95.958	67.5445	31.1116				-0.0487736	0.909273	0.0564098	0.916642	0.219696	-0.0125214	0.340121	0.185014
114	24.109	70.5168	294.851	32.0525	36.2338	58.7816				0.229167	-0.219473	0.981494	-0.00996618	-0.111687	0.0331902	0.150454	0.177188				19.0168	75.8343	70.8781	85.0987	74.661	28.2723				-0.148403	0.927857	0.168973	0.699741	0.348203	-0.10264	0.315622	0.176561
115	19.8684	76.0162	324.91	48.1728	36.7947	60.273				0.0129652	-0.158602	1.18351	0.487956	-0.097936	0.0594042	0.247882	0.208851				22.9587	70.9574	66.0813	97.3053	64.0685	36.0223				0.0281203	0.803876	0.0898603	0.943552	0.156928	0.143344	0.360947	0.1642
116	16.0977	74.3948	341.683	48.1265	33.9623	68.3333				-0.179279	-0.176549	1.29622	0.486526	-0.167376	0.201078	0.243437	0.237563				18.1499	68.2599	60.1906	77.0878	66.4212	34.1696				-0.187224	0.735301	-0.00729336	0.539733	0.199412	0.0845391	0.227411	0.141857
117	19.8045	72.0859	354.479	52.8117	39.6469	69.2038				0.0097073	-0.202105	1.38222	0.631242	-0.0280111	0.216379	0.334905	0.239762				17.5284	66.3693	61.1063	96.1097	54.339	33.8884				-0.215056	0.687238	0.00780903	0.919672	-0.0187644	0.0756139	0.242752	0.18411
118	27.7256	63.345	355.99	48.2654	36.5368	64.1271				0.413555	-0.298855	1.39237	0.490816	-0.104259	0.127147	0.336795	0.244021				16.1822	67.7264	50.4531	82.7221	65.1952	31.7545				-0.27534	0.721738	-0.167891	0.652271	0.177273	0.00788413	0.185989	0.170714
119	16.3045	70.6164	358.247	38.784	36.2938	71.4825				-0.168736	-0.218371	1.40754	0.197956	-0.110216	0.256431	0.227434	0.24927				23.6344	66.8784	56.2875	98.6179	59.0308	32.9062				0.0583791	0.70018	-0.0716661	0.96977	0.0659585	0.044439	0.29451	0.175609
120	21.9511	75.4521	364.99	52.8704	39.3544	65.2722				0.119149	-0.164846	1.45285	0.633055	-0.035182	0.147274	0.358717	0.245205				20.0917	67.5471	62.7594	87.2431	49.9452	32.8482				-0.100268	0.71718	0.0350731	0.742572	-0.0981062	0.042598	0.223175	0.162239
121	17.0977	71.9278	383.732	50.037	35.2183	64.2543				-0.128295	-0.203855	1.57881	0.545537	-0.136583	0.129383	0.297499	0.280037				22.6576	62.7994	57.7188	91.5887	55.1027	32.7634				0.0146367	0.596484	-0.0480601	0.82937	-0.0049738	0.0399065	0.237894	0.153648
122	16.3835	72.9352	368.534	50.6265	35.9481	69.0587				-0.164708	-0.192705	1.47667	0.563745	-0.118691	0.213828	0.296357	0.26429				20.3928	54.4924	42.1531	72.2578	58.9658	34.4643				-0.086784	0.385304	-0.304781	0.44326	0.0647848	0.0938929	0.0992794	0.11536
123	18.3459	76.4496	356.672	51.8642	42.5176	64.7278				-0.0646576	-0.153805	1.39696	0.601975	0.0423674	0.137705	0.326757	0.239572				15.6822	55.2112	57.25	81.1846	59.3767	35.3438				-0.297731	0.403577	-0.0557918	0.621561	0.0722047	0.121808	0.144271	0.133683
124	18.6053	77.6762	366.082	46.3457	40.663	62.0057				-0.0514324	-0.140228	1.4602	0.43152	-0.00310023	0.0898594	0.297803	0.24608				20.1266	58.9103	61.4344	89.1005	40.9418	30.1473				-0.0987048	0.497615	0.0132203	0.779672	-0.260687	-0.0431282	0.147998	0.163689
125	18.0414	73.8531	336.877	45.2099	39.4007	72.2184				-0.0801821	-0.182545	1.26393	0.396438	-0.034047	0.269366	0.27216	0.217847				20.9574	62.304	82.4844	89.6892	52.6336	33.5625				-0.0615005	0.58389	0.360392	0.79143	-0.04956	0.0652698	0.281654	0.145109
126	18.9398	69.7497	324.243	51.0957	41.5807	66.6471				-0.0343783	-0.227964	1.17902	0.578238	0.0193982	0.17144	0.28096	0.210851				17.4638	59.3754	66.2469	92.011	53	35.6116				-0.217948	0.509439	0.0925915	0.837805	-0.0429437	0.130308	0.218209	0.158183
127	20.8083	67.858	333.924	42.8457	37.7922	68.824				0.0608848	-0.248903	1.24408	0.323413	-0.0734812	0.209703	0.252616	0.214823				20.186	55.4347	49.1625	83.3437	64.4897	37.0625				-0.0960448	0.409259	-0.189177	0.664687	0.164534	0.176359	0.18827	0.129076
128	15.594	59.6488	328.359	47.7222	41.1101	60.0081				-0.20496	-0.339767	1.20668	0.474038	0.00786094	0.0547481	0.199767	0.231074				20.4419	54.3252	52.425	76.234	55.4212	26.7902				-0.0845852	0.381053	-0.135369	0.522679	0.000777563	-0.149682	0.0891456	0.118124
129	17.906	64.7036	323.274	47.8086	38.2208	67.7384				-0.0870853	-0.283818	1.17251	0.476706	-0.0629735	0.190622	0.234327	0.216103				23.9819	54.3906	68.425	79.6709	55.6096	33.0402				0.0739406	0.382716	0.128514	0.591327	0.00417963	0.0486921	0.204895	0.0946254
130	19.1128	65.8605	307.893	45.7716	37.8955	69.8639				-0.0255581	-0.271012	1.06914	0.413788	-0.0709486	0.227981	0.223899	0.19533				15.6473	66.0137	48.6	79.521	43.1438	39.9464				-0.299294	0.678198	-0.198454	0.588333	-0.220924	0.267894	0.135959	0.177456
131	16	61.8667	287.971	47.2315	38.8052	64.8892				-0.18426	-0.315218	0.935262	0.458881	-0.0486463	0.140542	0.164427	0.189605				18.1499	55.1398	60.0656	97.7733	60.2226	19.3973				-0.187224	0.401762	-0.00935495	0.9529	0.0874796	-0.384332	0.143538	0.194621
132	21.0489	67.5131	289.889	45.0247	37.5671	64.6748				0.0731515	-0.25272	0.948149	0.390718	-0.0789997	0.136774	0.202845	0.173103				18.407	56.7386	54.0219	90.1755	51.9692	36.4643				-0.175711	0.442406	-0.109032	0.801144	-0.0615575	0.157373	0.17577	0.155295
133	17.0414	70.3674	295.276	38.3981	37.666	70.7066				-0.131166	-0.221127	0.984356	0.186036	-0.0765751	0.242793	0.164053	0.180092				15.2687	60.4347	60.675	88.4077	55.976	28.8705				-0.316248	0.536369	0.000695718	0.765834	0.010796	-0.0836537	0.152299	0.167546
134	18.8759	60.0386	277.871	43.2222	39.1676	67.0033				-0.0376362	-0.335453	0.867387	0.335042	-0.0397617	0.177701	0.161213	0.168896				19.7403	62.6641	53.0594	84.9196	61.2637	32.25				-0.116004	0.593044	-0.124906	0.696163	0.106279	0.0236112	0.196365	0.146731
135	19.5301	61.9203	308.5	44.3642	44.5077	64.7416				-0.00428263	-0.314625	1.07322	0.370316	0.091157	0.137948	0.225623	0.192341				22.1085	57.9225	57.6844	81.3784	55.4315	25.9598				-0.00995272	0.472504	-0.0486274	0.625432	0.000963557	-0.176039	0.144047	0.132084
136	26.4699	58.9502	296.088	41.392	39.1299	70.383				0.349534	-0.3475	0.989808	0.278511	-0.0406859	0.237105	0.244462	0.182531				20.8243	62.2325	61.2125	86.0238	51.5171	38.6607				-0.0674609	0.582072	0.00956055	0.718218	-0.0697214	0.227086	0.233293	0.140139
137	21.8195	59.0012	265.32	46.5802	41.2294	69.3178				0.11244	-0.346936	0.783037	0.438764	0.0107857	0.218382	0.202745	0.157039				19.3643	58.5578	66.6281	89.7587	70.3596	36.7723				-0.132842	0.488654	0.0988785	0.792818	0.27053	0.167149	0.280865	0.131983
138	17.2143	60.6177	293.574	51.9722	40.7316	74.4303				-0.122351	-0.329043	0.972917	0.605311	-0.00141842	0.308244	0.238943	0.199053				23.6537	66.0714	59.3406	86.2559	52.9418	23.7232				0.0592433	0.679665	-0.0213122	0.722854	-0.0439946	-0.247028	0.191571	0.166452
139	23.203	61.3811	278.978	41.5648	37.8986	66.652				0.182976	-0.320593	0.874828	0.283849	-0.0708726	0.171526	0.186952	0.164001				19.5039	61.1945	80.1438	78.9324	50.839	37.0714				-0.12659	0.555684	0.321789	0.576577	-0.0819663	0.176642	0.237023	0.124049
140	21.3947	65.9166	271.93	51.0185	41.9944	68.5469				0.0907816	-0.270391	0.82746	0.575853	0.0295406	0.204833	0.243013	0.161879				18.3075	57.4088	83.1844	79.2633	60.5856	38.8438				-0.180166	0.459444	0.371937	0.583186	0.0940346	0.232898	0.260222	0.112366
141	16.6992	57.9664	251.298	59.108	41.7576	68.4597				-0.148612	-0.358389	0.688806	0.825721	0.0237351	0.2033	0.20576	0.191021				19.6344	56.2128	77.6094	82.649	60.0171	34.8661				-0.120746	0.42904	0.27999	0.650811	0.0837688	0.106646	0.238252	0.112311
142	23.203	58.2092	234.315	59.1574	36.8454	70.2176				0.182976	-0.355702	0.574679	0.827247	-0.096693	0.234198	0.227784	0.17583				20.9832	59.0015	64.7844	94.2413	57.8356	32.6875				-0.0603451	0.499934	0.0684709	0.882353	0.044376	0.0374974	0.245381	0.150434
143	25.5564	59.9352	228.901	55.2407	40.3197	76.2331				0.302961	-0.336597	0.538291	0.706268	-0.0115166	0.339931	0.256556	0.154317				20.2661	55.9362	51.5969	89.7569	45.3356	38.2723				-0.0924578	0.422008	-0.149027	0.792783	-0.181345	0.214758	0.167787	0.157844
144	25.109	63.0598	258.438	58.713	38.5003	69.3341				0.280151	-0.302012	0.736791	0.81352	-0.0561213	0.218669	0.281833	0.177835				22.1434	54.0851	65.825	89.9945	52.4726	26.6652				-0.00838985	0.374949	0.0856332	0.797528	-0.0524673	-0.15365	0.173934	0.144785
145	19.9135	59.6476	258.521	47.5617	39.4589	79.5322				0.0152645	-0.339781	0.737345	0.46908	-0.0326201	0.397919	0.207868	0.161198				18.5271	58.1383	48.9375	82.5265	53.887	26.1071				-0.170332	0.47799	-0.192888	0.648364	-0.0269265	-0.171364	0.0941406	0.151875
146	17.5414	55.188	261.733	45.1204	42.7891	77.1165				-0.105674	-0.389143	0.758933	0.393674	0.0490235	0.355458	0.177045	0.166757				16.5517	59.4301	55.9969	83.1956	57.4418	36.1295				-0.258793	0.51083	-0.0764589	0.661729	0.0372649	0.146746	0.17022	0.143843
147	19.8797	61.5616	241.583	43.216	39.6933	77.5933				0.0135413	-0.318595	0.623515	0.334851	-0.0268735	0.363839	0.165046	0.138111				16.9096	55.6778	63.3344	84.6965	49.5548	33.6205				-0.242766	0.415439	0.0445565	0.691707	-0.105156	0.0671108	0.145149	0.141554
148	20.7444	57.0859	231.241	48.8827	38.8435	67.2143				0.0576269	-0.368135	0.554018	0.509883	-0.0477073	0.18141	0.147849	0.142571				25.2003	52.1246	53.3344	96.9452	59.8527	30.125				0.128502	0.32511	-0.120371	0.93636	0.0808001	-0.043836	0.217761	0.15678
149	22.0113	54.9303	244.224	43.1481	39.5417	75.9103				0.122218	-0.391995	0.641265	0.332753	-0.0305902	0.334257	0.167985	0.145361				22.0052	51.2933	58.2219	73.4022	56.7295	42.2589				-0.0145786	0.303976	-0.0397626	0.466118	0.0244024	0.341293	0.180241	0.088245
150	22.3647	58.1046	225.612	58.3673	41.9246	65.1451				0.140236	-0.35686	0.516191	0.802842	0.0278293	0.14504	0.212546	0.164193				20.2907	57.2416	52.4813	83.4406	57.7055	22.4286				-0.0913562	0.455194	-0.134441	0.666622	0.0420267	-0.288119	0.108321	0.151919
151	26.1241	55.056	235.253	45.0463	38.1416	67.4564				0.331904	-0.390604	0.580976	0.391385	-0.0649152	0.185665	0.172402	0.143038				18.3101	56.7614	64.9281	86.5174	46.5514	31.8482				-0.18005	0.442986	0.0708409	0.728078	-0.15939	0.0108582	0.15222	0.147226
152	20.4624	54.5604	247.657	65.1944	39.7161	73.37				0.0432495	-0.396089	0.664336	1.01372	-0.0263146	0.289607	0.264751	0.207503				19.8411	61.5319	61.7938	93.4607	54.6336	40.8795				-0.11149	0.564262	0.0191478	0.866761	-0.0134447	0.297511	0.270458	0.156234
153	14.5489	63.939	215.697	53.6821	48.2566	76.4002				-0.258243	-0.292281	0.449555	0.658126	0.183066	0.342868	0.180515	0.157364				16.2119	59.5669	50.975	76.4497	44.5993	36.4062				-0.27401	0.514307	-0.159284	0.526988	-0.194641	0.155529	0.0948149	0.147288
154	26.6053	60.1482	210.368	50.1883	40.4199	78.9006				0.356437	-0.33424	0.413743	0.55021	-0.0090601	0.386817	0.227318	0.135689				22.27	65.5821	50.4719	94.6088	50.8356	35.3661				-0.00272054	0.667226	-0.167581	0.889693	-0.0820277	0.122516	0.237851	0.177683
155	24.3647	57.2603	207.305	57.0741	40.6432	67.3879				0.242203	-0.366205	0.39316	0.762898	-0.00358565	0.184461	0.202155	0.154725				17.0052	64.8754	48.375	79.8775	61.2226	36.6964				-0.238485	0.64926	-0.202165	0.595454	0.105537	0.164739	0.179057	0.154893
156	23.3684	58.6563	196.301	57.7654	37.3197	73.3309				0.191408	-0.350753	0.319208	0.784251	-0.085065	0.28892	0.191328	0.157869				18.5685	54.5365	59.5312	75.0658	53.5548	42.9777				-0.168479	0.386425	-0.0181687	0.499346	-0.0329253	0.364107	0.171718	0.113155
157	20.2256	62.5069	203.524	61.25	49.6537	84.5509				0.0311766	-0.308132	0.367747	0.891883	0.217317	0.486131	0.28102	0.166966				20.4109	49.8936	58.5781	81.8592	55.7329	33.9688				-0.0859734	0.268393	-0.0338879	0.635036	0.00640614	0.0781658	0.14469	0.11021
158	14.6955	60.8767	206.952	56.8457	41.9338	71.9992				-0.250769	-0.326176	0.390784	0.755843	0.0280549	0.265513	0.143875	0.167369				17.2519	49.7751	52.0969	89.8245	55.1575	33.7991				-0.227438	0.265381	-0.14078	0.794133	-0.00398424	0.0727795	0.126682	0.150736
159	25.906	61.325	203.285	51.9444	42.8547	62.8297				0.320785	-0.321214	0.36614	0.604452	0.0506318	0.104343	0.187523	0.130124				19.9031	56.6991	61.8688	84.011	44.8185	44.4286				-0.108713	0.441402	0.0203847	0.678015	-0.190682	0.410159	0.208428	0.142678
160	18.3195	58.5031	211.033	64.3673	44.7866	71.5126				-0.0660035	-0.352449	0.418212	0.98817	0.0979945	0.25696	0.223814	0.187531				21.9199	58.1307	55.6937	81.1444	51.4897	31.1295				-0.0183985	0.477796	-0.0814595	0.620759	-0.0702162	-0.0119533	0.152755	0.127237
161	13.9887	59.6339	193.249	50.6451	38.7359	71.7897				-0.286804	-0.339932	0.298695	0.56432	-0.0503453	0.26183	0.0746272	0.14642				21.3488	60.6778	56.1875	93.2048	44.5411	26.7812				-0.0439731	0.542549	-0.0733154	0.86165	-0.195692	-0.149968	0.156875	0.178628
162	16.2368	59.0536	210.107	53.4167	38.974	72.326				-0.172187	-0.346356	0.411991	0.649929	-0.044508	0.271257	0.128354	0.154754				20.1744	51.6003	56.6	78.9159	53.3836	34.3438				-0.0965642	0.311781	-0.0665121	0.576247	-0.0360167	0.0900682	0.129834	0.10821
163	18.5526	57.9166	192.265	59.213	35.1429	62.617				-0.0541192	-0.358941	0.292085	0.828964	-0.138432	0.100604	0.111694	0.169184				20.0194	49.7067	45.9719	92.8921	64.1986	36.0893				-0.103505	0.263642	-0.241798	0.855404	0.159277	0.14547	0.179748	0.15525
164	16.6203	59.1781	186.479	41.9074	37.7322	63.2469				-0.152635	-0.344978	0.253204	0.294431	-0.0749521	0.111676	0.0144576	0.101644				16.5543	51.3982	76.0156	79.5576	52.6062	24.4955				-0.258677	0.306643	0.253704	0.589064	-0.0500548	-0.222516	0.103027	0.136704
165	22.4286	60.4271	195.246	47.1605	40.1367	68.934				0.143494	-0.331153	0.312121	0.456688	-0.0160031	0.211636	0.129464	0.112652				17.7015	63.6626	65.3969	86.2815	59.1096	45.4643				-0.207304	0.618428	0.0785727	0.723366	0.0673815	0.443032	0.287246	0.148393
166	19.1128	52.1382	193.907	42.7068	37.5182	67.414				-0.0255581	-0.4229	0.303121	0.319123	-0.0801986	0.18492	0.0464179	0.115603				19.6098	61.0122	57.4406	81.6051	58.2842	35.5759				-0.121848	0.55105	-0.0526483	0.62996	0.0524767	0.129175	0.198028	0.129393
167	20.2519	69.0822	186.307	44.7099	42.1923	68.965				0.0325174	-0.235352	0.252047	0.380994	0.0343923	0.212181	0.112797	0.0885056				16.9134	62.734	54.4188	94.9817	45.2192	35.3661				-0.242596	0.594821	-0.102486	0.897141	-0.183447	0.122516	0.180992	0.18975
168	20.2707	61.4134	180.831	47.9321	36.6871	59.5876				0.0334759	-0.320236	0.215244	0.480521	-0.100574	0.047357	0.0592981	0.11138				20.7054	66.1033	74.2906	85.3181	42.9726	34.2321				-0.0727854	0.680476	0.225254	0.704123	-0.224015	0.0865229	0.233262	0.157699
169	24.7481	57.4471	189.325	46.4352	39.055	66.8533				0.26175	-0.364137	0.272325	0.434285	-0.0425222	0.175065	0.122794	0.116313				18.4186	68.2903	66.4281	75.4241	45.8082	40.558				-0.175191	0.736073	0.09558	0.506503	-0.172811	0.287306	0.21291	0.1504
170	18.2594	59.3051	163.428	48.0895	37.4978	71.2258				-0.0690677	-0.343572	0.0982895	0.485383	-0.0806987	0.251919	0.0570422	0.118113				17.7429	70.81	73.8625	83.351	56.0069	31.0134				-0.20545	0.800129	0.218193	0.664833	0.0113539	-0.0156383	0.24557	0.164375
171	19.2632	57.5965	162.263	51.2932	36.4465	68.8566				-0.0178902	-0.362484	0.090461	0.584338	-0.106473	0.210276	0.0663715	0.130444				16.4509	67.7356	58.8656	89.3199	52.4144	23.4643				-0.263307	0.721972	-0.0291462	0.784054	-0.0535182	-0.255246	0.150801	0.194742
172	10.6842	57.5953	171.81	61.3981	40.9586	72.3227				-0.45528	-0.362497	0.154623	0.896457	0.00414674	0.271199	0.0847748	0.199723				18.2881		62.65	85.7404	49.3425					-0.181035	-1	0.0332688	0.712558	-0.10899	-1	-0.257366	0.268084
173	14.297		166.101	55.9969	40.7032	77.7237				-0.271086	-1	0.116254	0.729626	-0.00211468	0.366131	-0.0101982	0.241715				17.8824		61.8125	76.0475	52.6062					-0.199203	-1	0.0194562	0.518954	-0.0500548	-1	-0.285141	0.24658
174	15.7481		182.614	46.0247	39.8942	69.1377				-0.197103	-1	0.22723	0.421605	-0.0219482	0.215217	-0.0591665	0.207688						48.5531	89.9378	57.0548					-1	-1	-0.199227	0.796396	0.0302766	-1	-0.395426	0.302031
175	14.5376		169.919	56.3611	39.5906	71.5754				-0.258819	-1	0.14191	0.740875	-0.0293913	0.258064	-0.0245603	0.238038						53.375	85.6545	53.411					-1	-1	-0.119701	0.710842	-0.035522	-1	-0.407397	0.290118
176	14.0451		163.127	60.3519	43.397	69.6438				-0.283928	-1	0.0962667	0.864142	0.0639269	0.224112	-0.00591333	0.251046						50.3406	72.0347	54.5685					-1	-1	-0.169747	0.438804	-0.0146202	-1	-0.457594	0.255944
177			168.421	50.2315	40.9604	65.2168				-1	-1	0.131843	0.551545	0.00419087	0.1463	-0.194354	0.265604						56.25	82.1005	57.7123					-1	-1	-0.0722846	0.639855	0.0421495	-1	-0.39838	0.286599
178			185.812	53.3735		62.4295				-1	-1	0.248722	0.648594	-1	0.0973084	-0.334229	0.306689						57.2156	88.6929	48.2877					-1	-1	-0.0563592	0.77153	-0.128037	-1	-0.402144	0.296901
179						60.4434				-1	-1	-1	-1	-1	0.0623992	-0.822933	0.177067						56.0281	70.4424	46.25					-1	-1	-0.0759443	0.406999	-0.164833	-1	-0.472296	0.249012
180																							53.5312	82.34	47.8493					-1	-1	-0.117125	0.644639	-0.135953	-1	-0.43474	0.277715

## Sheet: B
sucrose concentration(mM)	6.25	12.5	25	50	100	200	400	800				sucrose concentration(mM)	6.25	12.5	25	50	100	200	400	800
w1118	3/10	6/10	7/10	8/10	10/10	10/10	10/10	10/10				w1118	0.3	0.6	0.7	0.8	1	1	1	1		Bonferroni's multiple comparisons test	95% confidence interval	P value	F (DFn, DFd)				Bonferroni's multiple comparisons test	95% confidence interval	P value	F (DFn, DFd)
	1/10	3/10	4/10	9/10	9/10	10/10	10/10	10/10					0.1	0.3	0.4	0.9	0.9	1	1	1		w1118 vs. TH	0.3551 to 0.4567	<0.0001	F (14, 72) = 15.05				w1118 - TH			F (7, 48) = 20.71
	3/10	7/10	7/10	8/10	10/10	10/10	10/10	10/10					0.3	0.7	0.7	0.8	1	1	1	1									Row 1	7.336e-005 to 0.3749	0.0498
	3/12	3/12	8/12	11/12	12/12	12/12	12/12	12/12					0.25	0.25	0.666667	0.916667	1	1	1	1									Row 2	0.2001 to 0.5749	<0.0001
																													Row 3	0.3301 to 0.7049	<0.0001
												mean	0.2375	0.4625	0.616667	0.854167	0.975	1	1	1									Row 4	0.5926 to 0.9674	<0.0001
												SEM	0.0473242	0.110633	0.0726483	0.0314576	0.025	0	0	0									Row 5	0.6626 to 1.037	<0.0001
																													Row 6	0.1876 to 0.5624	<0.0001
																													Row 7	-0.06243 to 0.3124	0.4995
																													Row 8	-0.1624 to 0.2124	>0.9999
TH	1/10	1/10	1/10	0/10	0/10	6/10	8/10	10/10				TH	0.1	0.1	0.1	0	0	0.6	0.8	1
	0/10	0/10	0/10	0/10	2/10	7/10	9/10	10/10					0	0	0	0	0.2	0.7	0.9	1
	0/10	0/10	1/10	1/10	1/10	5/10	9/10	10/10					0	0	0.1	0.1	0.1	0.5	0.9	1
	1/10	2/10	2/10	2/10	2/10	7/10	9/10	9/10					0.1	0.2	0.2	0.2	0.2	0.7	0.9	0.9
												Mean	0.05	0.075	0.1	0.075	0.125	0.625	0.875	0.975
												SEM	0.0288675	0.0478714	0.0408248	0.0478714	0.0478714	0.0478714	0.025	0.025

## Sheet: C
TH-KO ST12h PER
sucrose concentration(mM)	6.25	12.5	25	50	100	200	400	800
fed	0/10	0/10	0/10	0/10	1/10	1/10	3/10	9/10								Bonferroni's multiple comparisons test	95% confidence interval	P value	F (DFn, DFd)
	0/10	0/10	0/10	0/10	0/10	1/10	4/10	9/10		Bonferroni's multiple comparisons test	95% confidence interval	P value	F (DFn, DFd)			fed - ST-12h			F (7, 48) = 18.29
	0/10	0/10	0/10	0/10	0/10	2/10	5/10	10/10		fed vs. ST-12h	-0.2217 to -0.1408	<0.0001	F (14, 72) = 10.42			Row 1	-0.1822 to 0.08217	>0.9999
	0/10	0/10	0/10	0/10	0/10	1/10	3/10	9/10								Row 2	-0.2072 to 0.05717	0.8891
																Row 3	-0.2322 to 0.03217	0.2838
																Row 4	-0.2072 to 0.05717	0.8891
																Row 5	-0.2322 to 0.03217	0.2838
																Row 6	-0.6322 to -0.3678	<0.0001
																Row 7	-0.6322 to -0.3678	<0.0001
ST-12h	1/10	1/10	1/10	0/10	0/10	6/10	8/10	10/10								Row 8	-0.1822 to 0.08217	>0.9999
	0/10	0/10	0/10	0/10	2/10	7/10	9/10	10/10
	0/10	0/10	1/10	1/10	1/10	5/10	9/10	10/10
	1/10	2/10	2/10	2/10	2/10	7/10	9/10	9/10
sucrose concentration(mM)	6.25	12.5	25	50	100	200	400	800
fed	0	0	0	0	0.1	0.1	0.3	0.9
	0	0	0	0	0	0.1	0.4	0.9
	0	0	0	0	0	0.2	0.5	1
	0	0	0	0	0	0.1	0.3	0.9
Mean	0	0	0	0	0.025	0.125	0.375	0.925
SEM	0	0	0	0	0.025	0.025	0.0478714	0.025
ST-12h	0.1	0.1	0.1	0	0	0.6	0.8	1
	0	0	0	0	0.2	0.7	0.9	1
	0	0	0.1	0.1	0.1	0.5	0.9	1
	0.1	0.2	0.2	0.2	0.2	0.7	0.9	0.9
Mean	0.05	0.075	0.1	0.075	0.125	0.625	0.875	0.975
SEM	0.0288675	0.0478714	0.0408248	0.0478714	0.0478714	0.0478714	0.025	0.025

## Sheet: D
TH-KO ST12h PER
sucrose concentration(mM)	6.25	12.5	25	50	100	200	400	800
fed	0/10	0/10	0/10	0/10	1/10	1/10	3/10	9/10
	0/10	0/10	0/10	0/10	0/10	1/10	4/10	9/10
	0/10	0/10	0/10	0/10	0/10	2/10	5/10	10/10
	0/10	0/10	0/10	0/10	0/10	1/10	3/10	9/10
ST-12h	1/10	1/10	1/10	0/10	0/10	6/10	8/10	10/10
	0/10	0/10	0/10	0/10	2/10	7/10	9/10	10/10
	0/10	0/10	1/10	1/10	1/10	5/10	9/10	10/10
	1/10	2/10	2/10	2/10	2/10	7/10	9/10	9/10
sucrose concentration(mM)	6.25	12.5	25	50	100	200	400	800					95% confidence interval	P value	F (DFn, DFd)
fed	0	0	0	0	0.1	0.1	0.3	0.9					1.187 to 1.602	<0.0001	3.161,3,3
	0	0	0	0	0	0.1	0.4	0.9
	0	0	0	0	0	0.2	0.5	1
	0	0	0	0	0	0.1	0.3	0.9
Mean	0	0	0	0	0.025	0.125	0.375	0.925
SEM	0	0	0	0	0.025	0.025	0.0478714	0.025
ST-12h	0.1	0.1	0.1	0	0	0.6	0.8	1
	0	0	0	0	0.2	0.7	0.9	1
	0	0	0.1	0.1	0.1	0.5	0.9	1
	0.1	0.2	0.2	0.2	0.2	0.7	0.9	0.9
Mean	0.05	0.075	0.1	0.075	0.125	0.625	0.875	0.975
SEM	0.0288675	0.0478714	0.0408248	0.0478714	0.0478714	0.0478714	0.025	0.025
