# Supplementary material for: Hugin-AstA circuitry is a novel central energy sensor that directly regulates sweet sensation in Drosophila and mouse
Source: eLife. 2026 May 5;14:RP108551. doi: 10.7554/eLife.108551 (PMC13143273; doi:10.7554/eLife.108551)
Supplement: Figure 1—figure supplement 2—source data 1. [file elife-108551-fig1-figsupp2-data1.xlsx]

## Sheet: A
	6.25	12.5	25	50	100	200	400	800					6.25	12.5	25	50	100	200	400	800
w1118/TRPA1 fed 30℃	0/10	0/10	0/10	0/10	0/10	0/10	3/10	7/10				w1118/TRPA1 fed 30℃	0	0	0	0	0	0	0.3	0.7			Bonferroni's multiple comparisons test	95% confidence interval	P value	F (DFn, DFd)
	0/10	0/10	0/10	0/10	0/10	0/10	2/10	5/10					0	0	0	0	0	0	0.2	0.5			+/TRPA1 fed 30℃ vs. CCHa1/TRPA1 fed 30℃	-0.008476 to 0.05223	0.3826	F (56, 216) = 24.25
	0/10	0/10	0/10	0/10	0/10	0/10	1/10	5/10					0	0	0	0	0	0	0.1	0.5			+/TRPA1 fed 30℃ vs. CCHa2/TRPA1 fed 30℃	-0.002226 to 0.05848	0.0895
	0/10	0/10	0/10	0/10	0/10	1/10	2/10	6/10					0	0	0	0	0	0.1	0.2	0.6			+/TRPA1 fed 30℃ vs. LK/TRPA1 fed 30℃	0.04465 to 0.1054	<0.0001
																							+/TRPA1 fed 30℃ vs. TK/TRPA1 fed 30℃	0.02277 to 0.08348	<0.0001
												mean	0	0	0	0	0	0.025	0.2	0.575			+/TRPA1 fed 30℃ vs. Hugin/TRPA1 fed 30℃	0.01652 to 0.07723	0.0002
												SEM	0	0	0	0	0	0.025	0.0408248	0.0478714			+/TRPA1 fed 30℃ vs. ASTA/TRPA1 fed 30℃	0.04152 to 0.1022	<0.0001
CCHa1/TRPA1 fed 30℃	0/10	0/10	0/10	0/10	0/10	0/10	2/10	6/10				CCHa1/TRPA1 fed 30℃	0	0	0	0	0	0	0.2	0.6			+/TRPA1 fed 30℃ vs. TH/TRPA1 fed 30℃	-0.1304 to -0.06965	<0.0001
	0/10	0/10	0/10	0/10	0/10	0/10	1/10	4/10					0	0	0	0	0	0	0.1	0.4
	0/10	0/10	0/10	0/10	0/10	0/10	0/10	4/10					0	0	0	0	0	0	0	0.4
	0/10	0/10	0/10	0/10	0/10	1/10	2/10	5/10					0	0	0	0	0	0.1	0.2	0.5
												mean	0	0	0	0	0	0.025	0.125	0.475
												SEM	0	0	0	0	0	0.025	0.0478714	0.0478714			Bonferroni's multiple comparisons test	95% confidence interval	P value	F (DFn, DFd)
CCHa2/TRPA1 fed 30℃	0/10	0/10	0/10	0/10	0/10	1/10	2/10	5/10															Row 6			F (56, 216) = 24.25
	0/10	0/10	0/10	0/10	0/10	0/10	1/10	4/10				CCHa2/TRPA1 fed 30℃	0	0	0	0	0	0.1	0.2	0.5			+/TRPA1 fed 30℃ vs. CCHa1/TRPA1 fed 30℃	-0.08585 to 0.08585	>0.9999
	0/10	0/10	0/10	0/10	0/10	0/10	2/10	4/10					0	0	0	0	0	0	0.1	0.4			+/TRPA1 fed 30℃ vs. CCHa2/TRPA1 fed 30℃	-0.08585 to 0.08585	>0.9999
	0/10	0/10	0/10	0/10	0/10	0/10	1/10	3/10					0	0	0	0	0	0	0.2	0.4			+/TRPA1 fed 30℃ vs. LK/TRPA1 fed 30℃	-0.06085 to 0.1108	>0.9999
													0	0	0	0	0	0	0.1	0.3			+/TRPA1 fed 30℃ vs. TK/TRPA1 fed 30℃	-0.1108 to 0.06085	>0.9999
																							+/TRPA1 fed 30℃ vs. Hugin/TRPA1 fed 30℃	-0.1108 to 0.06085	>0.9999
												mean	0	0	0	0	0	0.025	0.15	0.4			+/TRPA1 fed 30℃ vs. ASTA/TRPA1 fed 30℃	-0.06085 to 0.1108	>0.9999
												SEM	0	0	0	0	0	0.025	0.0288675	0.0408248			+/TRPA1 fed 30℃ vs. TH/TRPA1 fed 30℃	-0.2608 to -0.08915	<0.0001
LK/TRPA1 fed 30℃	0/10	0/10	0/10	0/10	0/10	0/10	0/10	2/10				LK/TRPA1 fed 30℃	0	0	0	0	0	0	0	0.2			Row 7
	0/10	0/10	0/10	0/10	0/10	0/10	1/10	2/10					0	0	0	0	0	0	0.1	0.2			+/TRPA1 fed 30℃ vs. CCHa1/TRPA1 fed 30℃	-0.01085 to 0.1608	0.1334
	0/10	0/10	0/10	0/10	0/10	0/10	0/10	1/10					0	0	0	0	0	0	0	0.1			+/TRPA1 fed 30℃ vs. CCHa2/TRPA1 fed 30℃	-0.03585 to 0.1358	0.8737
	0/10	0/10	0/10	0/10	0/10	0/10	1/10	1/10					0	0	0	0	0	0	0.1	0.1			+/TRPA1 fed 30℃ vs. LK/TRPA1 fed 30℃	0.06415 to 0.2358	<0.0001
																							+/TRPA1 fed 30℃ vs. TK/TRPA1 fed 30℃	0.01415 to 0.1858	0.012
												mean	0	0	0	0	0	0	0.05	0.15			+/TRPA1 fed 30℃ vs. Hugin/TRPA1 fed 30℃	0.03915 to 0.2108	0.0006
												SEM	0	0	0	0	0	0	0.0288675	0.0288675			+/TRPA1 fed 30℃ vs. ASTA/TRPA1 fed 30℃	0.06415 to 0.2358	<0.0001
TK/TRPA1 fed 30℃	0/10	0/10	0/10	0/10	0/10	0/10	1/10	2/10				TK/TRPA1 fed 30℃	0	0	0	0	0	0	0.1	0.2			+/TRPA1 fed 30℃ vs. TH/TRPA1 fed 30℃	-0.3358 to -0.1642	<0.0001
	0/10	0/10	0/10	0/10	1/10	1/10	1/10	2/10					0	0	0	0	0.1	0.1	0.1	0.2			Row 8
	0/10	0/10	0/10	0/10	0/10	1/10	1/10	1/10					0	0	0	0	0	0.1	0.1	0.1			+/TRPA1 fed 30℃ vs. CCHa1/TRPA1 fed 30℃	0.01415 to 0.1858	0.012
	0/10	0/10	0/10	0/10	0/10	0/10	1/10	3/10					0	0	0	0	0	0	0.1	0.3			+/TRPA1 fed 30℃ vs. CCHa2/TRPA1 fed 30℃	0.08915 to 0.2608	<0.0001
																							+/TRPA1 fed 30℃ vs. LK/TRPA1 fed 30℃	0.3392 to 0.5108	<0.0001
												mean	0	0	0	0	0.025	0.05	0.1	0.2			+/TRPA1 fed 30℃ vs. TK/TRPA1 fed 30℃	0.2892 to 0.4608	<0.0001
												SEM	0	0	0	0	0.025	0.0288675	0	0.0408248			+/TRPA1 fed 30℃ vs. Hugin/TRPA1 fed 30℃	0.1892 to 0.3608	<0.0001
Hugin/TRPA1 fed 30℃	0/10	0/10	0/10	0/10	0/10	0/10	0/10	2/10				Hugin/TRPA1 fed 30℃	0	0	0	0	0	0	0	0.2			+/TRPA1 fed 30℃ vs. ASTA/TRPA1 fed 30℃	0.3142 to 0.4858	<0.0001
	0/10	0/10	0/10	0/10	0/10	0/10	1/10	2/10					0	0	0	0	0	0	0.1	0.2			+/TRPA1 fed 30℃ vs. TH/TRPA1 fed 30℃	-0.3858 to -0.2142	<0.0001
	0/10	0/10	0/10	0/10	0/10	1/10	1/10	4/10					0	0	0	0	0	0.1	0.1	0.4
	0/10	0/10	0/10	0/10	0/10	1/10	1/10	4/10					0	0	0	0	0	0.1	0.1	0.4
												mean	0	0	0	0	0	0.05	0.075	0.3
												SEM	0	0	0	0	0	0.0288675	0.025	0.057735
ASTA/TRPA1 fed 30℃	0/10	0/10	0/10	0/10	0/10	0/10	1/10	2/10				ASTA/TRPA1 fed 30℃	0	0	0	0	0	0	0.1	0.2
	0/10	0/10	0/10	0/10	0/10	0/10	0/10	2/10					0	0	0	0	0	0	0	0.2
	0/10	0/10	0/10	0/10	0/10	0/10	0/10	1/10					0	0	0	0	0	0	0	0.1
	0/10	0/10	0/10	0/10	0/10	0/10	1/10	2/10					0	0	0	0	0	0	0.1	0.2
												mean	0	0	0	0	0	0	0.05	0.175
												SEM	0	0	0	0	0	0	0.0288675	0.025
ilp2/TRPA1 fed 30℃	0/10	0/10	0/10	0/10	1/10	3/10	5/10	9/10				ilp2/TRPA1 fed 30℃	0	0	0	0	0.1	0.3	0.5	0.9
	0/10	0/10	0/10	0/10	0/10	0/10	4/10	10/10					0	0	0	0	0	0	0.4	1
	0/10	0/10	0/10	0/10	1/10	2/10	6/10	9/10					0	0	0	0	0.1	0.2	0.6	0.9
	0/10	0/10	0/10	0/10	0/10	2/10	5/10	9/10					0	0	0	0	0	0.2	0.5	0.9
												mean	0	0	0	0	0.05	0.175	0.5	0.925
												SEM	0	0	0	0	0.0288675	0.0629153	0.0408248	0.025
TH/TRPA1 fed 30℃	0/10	0/10	0/10	0/10	1/10	2/10	5/10	8/10				TH/TRPA1 fed 30℃	0	0	0	0	0.1	0.2	0.5	0.8
	0/10	0/10	0/10	0/10	1/10	3/10	4/10	9/10					0	0	0	0	0.1	0.3	0.4	0.9
	0/10	0/10	0/10	0/10	1/10	2/10	4/10	9/10					0	0	0	0	0.1	0.2	0.4	0.9
	0/10	0/10	0/10	0/10	0/10	1/10	5/10	9/10					0	0	0	0	0	0.1	0.5	0.9
												mean	0	0	0	0	0.075	0.2	0.45	0.875
												SEM	0	0	0	0	0.025	0.0408248	0.0288675	0.025

## Sheet: B
	6.25	12.5	25	50	100	200	400	800					6.25	12.5	25	50	100	200	400	800
w1118/TRPA1 ST 30℃	0/10	0/10	1/10	1/10	2/10	4/10	9/10	10/10				/TRPA1 ST 30℃	0	0	0.1	0.1	0.2	0.4	0.9	1
	0/10	0/10	0/10	0/10	1/10	3/10	8/10	10/10					0	0	0	0	0.1	0.3	0.8	1
	0/10	0/10	1/10	1/10	3/10	4/10	10/10	10/10					0	0	0.1	0.1	0.3	0.4	1	1
	0/10	0/10	0/10	0/10	1/10	4/10	9/10	10/10					0	0	0	0	0.1	0.4	0.9	1				Bonferroni's multiple comparisons test	95% confidence interval	P value	F (DFn, DFd)
																								/TRPA1 ST 30℃ vs. CCHa1/TRPA1 ST 30℃	0.1404 to 0.2283	<0.0001	F (56, 224) = 18.74
												Mean	0	0	0.05	0.05	0.175	0.375	0.9	1				/TRPA1 ST 30℃ vs. CCHa2/TRPA1 ST 30℃	0.09040 to 0.1783	<0.0001
												SEM	0	0	0.0288675	0.0288675	0.0478714	0.025	0.0408248	0				/TRPA1 ST 30℃ vs. LK/TRPA1 ST 30℃	0.1904 to 0.2783	<0.0001
CCHa1/TRPA1 ST 30℃	0/10	0/10	0/10	0/10	0/10	0/10	2/10	5/10				CCHa1/TRPA1 ST 30℃	0	0	0	0	0	0	0.2	0.5				/TRPA1 ST 30℃ vs. TK/TRPA1 ST 30℃	0.1810 to 0.2690	<0.0001
	0/10	0/10	0/10	0/10	1/10	2/10	3/10	9/10					0	0	0	0	0.1	0.2	0.3	0.9				/TRPA1 ST 30℃ vs. Hugin/TRPA1 ST 30℃	0.1670 to 0.2505	<0.0001
	0/10	0/10	0/10	0/10	0/10	1/10	3/10	8/10					0	0	0	0	0	0.1	0.3	0.8				/TRPA1 ST 30℃ vs. ASTA/TRPA1 ST 30℃	0.1935 to 0.2815	<0.0001
	0/10	0/10	0/10	0/10	0/10	1/10	2/10	6/10					0	0	0	0	0	0.1	0.2	0.6				/TRPA1 ST 30℃ vs. TH/TRPA1 ST 30℃	-0.09397 to -0.006026	0.0154
												Mean	0	0	0	0	0.025	0.1	0.25	0.7
												SEM	0	0	0	0	0.025	0.0408248	0.0288675	0.0912871
CCHa2/TRPA1 ST 30℃	0/10	0/10	0/10	0/10	0/10	2/10	3/10	8/10				CCHa2/TRPA1 ST 30℃	0	0	0	0	0	0.2	0.3	0.8
	0/10	0/10	0/10	0/10	1/10	2/10	3/10	8/10					0	0	0	0	0.1	0.2	0.3	0.8
	0/10	0/10	0/10	0/10	2/10	3/10	6/10	9/10					0	0	0	0	0.2	0.3	0.6	0.9
	0/10	0/10	0/10	0/10	0/10	2/10	3/10	7/10					0	0	0	0	0	0.2	0.3	0.7
												Mean	0	0	0	0	0.075	0.225	0.375	0.8
												SEM	0	0	0	0	0.0478714	0.025	0.075	0.0408248				Bonferroni's multiple comparisons test	95% confidence interval	P value	F (DFn, DFd)
LK/TRPA1 ST 30℃	0/10	0/10	0/10	0/10	0/10	0/10	1/10	3/10				LK/TRPA1 ST 30℃	0	0	0	0	0	0	0.1	0.3				Row 5			F (56, 224) = 18.74
	0/10	0/10	0/10	0/10	0/10	1/10	2/10	6/10					0	0	0	0	0	0.1	0.2	0.6				/TRPA1 ST 30℃ vs. CCHa1/TRPA1 ST 30℃	0.02562 to 0.2744	0.0081
	0/10	0/10	0/10	0/10	0/10	1/10	0/10	4/10					0	0	0	0	0	0.1	0	0.4				/TRPA1 ST 30℃ vs. CCHa2/TRPA1 ST 30℃	-0.02438 to 0.2244	0.2197
	0/10	0/10	0/10	0/10	0/10	0/10	3/10	6/10					0	0	0	0	0	0	0.3	0.6				/TRPA1 ST 30℃ vs. LK/TRPA1 ST 30℃	0.05062 to 0.2994	0.0011
																								/TRPA1 ST 30℃ vs. TK/TRPA1 ST 30℃	0.02562 to 0.2744	0.0081
												Mean	0	0	0	0	0	0.05	0.15	0.475				/TRPA1 ST 30℃ vs. Hugin/TRPA1 ST 30℃	0.05700 to 0.2930	0.0005
												SEM	0	0	0	0	0	0.0288675	0.0645497	0.075				/TRPA1 ST 30℃ vs. ASTA/TRPA1 ST 30℃	0.05062 to 0.2994	0.0011
TK/TRPA1 ST 30℃	0/10	0/10	0/10	0/10	1/10	0/10	2/10	6/10				TK/TRPA1 ST 30℃	0	0	0	0	0.1	0	0.2	0.6				/TRPA1 ST 30℃ vs. ilp2/TRPA1 ST 30℃	-0.1494 to 0.09938	>0.9999
	0/10	0/10	0/10	0/10	0/10	1/10	3/10	5/10					0	0	0	0	0	0.1	0.3	0.5				/TRPA1 ST 30℃ vs. TH/TRPA1 ST 30℃	-0.2244 to 0.02438	0.2197
	0/10	0/10	0/10	0/10	0/10	1/10	2/10	4/10					0	0	0	0	0	0.1	0.2	0.4				Row 6
	0/10	0/10	0/10	0/10	0/10	0/10	1/10	4/10					0	0	0	0	0	0	0.1	0.4				/TRPA1 ST 30℃ vs. CCHa1/TRPA1 ST 30℃	0.1506 to 0.3994	<0.0001
																								/TRPA1 ST 30℃ vs. CCHa2/TRPA1 ST 30℃	0.02562 to 0.2744	0.0081
												Mean	0	0	0	0	0.025	0.05	0.2	0.475				/TRPA1 ST 30℃ vs. LK/TRPA1 ST 30℃	0.2006 to 0.4494	<0.0001
												SEM	0	0	0	0	0.025	0.0288675	0.0408248	0.0478714				/TRPA1 ST 30℃ vs. TK/TRPA1 ST 30℃	0.2006 to 0.4494	<0.0001
Hugin/TRPA1 ST 30℃	0/10	0/10	0/10	0/10	0/10	0/10	1/10	5/10				Hugin/TRPA1 ST 30℃	0	0	0	0	0	0	0.1	0.5				/TRPA1 ST 30℃ vs. Hugin/TRPA1 ST 30℃	0.1970 to 0.4330	<0.0001
	0/10	0/10	0/10	0/10	0/10	1/10	4/10	6/10					0	0	0	0	0	0.1	0.4	0.6				/TRPA1 ST 30℃ vs. ASTA/TRPA1 ST 30℃	0.2006 to 0.4494	<0.0001
	0/10	0/10	0/10	0/10	0/10	0/10	2/10	7/10					0	0	0	0	0	0	0.2	0.7				/TRPA1 ST 30℃ vs. ilp2/TRPA1 ST 30℃	-0.2744 to -0.02562	0.0081
	0/10	0/10	0/10	0/10	0/10	2/10	3/10	5/10					0	0	0	0	0	0.2	0.3	0.5				/TRPA1 ST 30℃ vs. TH/TRPA1 ST 30℃	-0.3494 to -0.1006	<0.0001
	0/10	0/10	0/10	0/10	0/10	0/10	2/10	6/10					0	0	0	0	0	0	0.2	0.6				Row 7
												Mean	0	0	0	0	0	0.06	0.24	0.58				/TRPA1 ST 30℃ vs. CCHa1/TRPA1 ST 30℃	0.5256 to 0.7744	<0.0001
												SEM	0	0	0	0	0	0.04	0.0509902	0.0374166				/TRPA1 ST 30℃ vs. CCHa2/TRPA1 ST 30℃	0.4006 to 0.6494	<0.0001
ASTA/TRPA1 ST 30℃	0/10	0/10	0/10	0/10	0/10	0/10	1/10	3/10				ASTA/TRPA1 ST 30℃	0	0	0	0	0	0	0.1	0.3				/TRPA1 ST 30℃ vs. LK/TRPA1 ST 30℃	0.6256 to 0.8744	<0.0001
	0/10	0/10	0/10	0/10	0/10	0/10	1/10	6/10					0	0	0	0	0	0	0.1	0.6				/TRPA1 ST 30℃ vs. TK/TRPA1 ST 30℃	0.5756 to 0.8244	<0.0001
	0/10	0/10	0/10	0/10	0/10	1/10	2/10	4/10					0	0	0	0	0	0.1	0.2	0.4				/TRPA1 ST 30℃ vs. Hugin/TRPA1 ST 30℃	0.5420 to 0.7780	<0.0001
	0/10	0/10	0/10	0/10	0/10	1/10	2/10	5/10					0	0	0	0	0	0.1	0.2	0.5				/TRPA1 ST 30℃ vs. ASTA/TRPA1 ST 30℃	0.6256 to 0.8744	<0.0001
																								/TRPA1 ST 30℃ vs. ilp2/TRPA1 ST 30℃	-0.1494 to 0.09938	>0.9999
												Mean	0	0	0	0	0	0.05	0.15	0.45				/TRPA1 ST 30℃ vs. TH/TRPA1 ST 30℃	-0.1744 to 0.07438	>0.9999
												SEM	0	0	0	0	0	0.0288675	0.0288675	0.0645497				Row 8
ilp2/TRPA1 ST 30℃	0/10	0/10	0/10	1/10	3/10	7/10	10/10	10/10				ilp2/TRPA1 ST 30℃	0	0	0	0.1	0.3	0.7	1	1				/TRPA1 ST 30℃ vs. CCHa1/TRPA1 ST 30℃	0.1756 to 0.4244	<0.0001
	0/10	0/10	0/10	0/10	2/10	4/10	9/10	10/10					0	0	0	0	0.2	0.4	0.9	1				/TRPA1 ST 30℃ vs. CCHa2/TRPA1 ST 30℃	0.07562 to 0.3244	0.0001
	0/10	0/10	0/10	0/10	1/10	5/10	9/10	10/10					0	0	0	0	0.1	0.5	0.9	1				/TRPA1 ST 30℃ vs. LK/TRPA1 ST 30℃	0.4006 to 0.6494	<0.0001
	0/10	0/10	0/10	1/10	2/10	5/10	9/10	10/10					0	0	0	0.1	0.2	0.5	0.9	1				/TRPA1 ST 30℃ vs. TK/TRPA1 ST 30℃	0.4006 to 0.6494	<0.0001
																								/TRPA1 ST 30℃ vs. Hugin/TRPA1 ST 30℃	0.3020 to 0.5380	<0.0001
												Mean	0	0	0	0.05	0.2	0.525	0.925	1				/TRPA1 ST 30℃ vs. ASTA/TRPA1 ST 30℃	0.4256 to 0.6744	<0.0001
												SEM	0	0	0	0.0288675	0.0408248	0.0629153	0.025	0				/TRPA1 ST 30℃ vs. ilp2/TRPA1 ST 30℃	-0.1244 to 0.1244	>0.9999
TH/TRPA1 ST 30℃	0/10	0/10	0/10	1/10	4/10	7/10	10/10	10/10				TH/TRPA1 ST 30℃	0	0	0	0.1	0.4	0.7	1	1				/TRPA1 ST 30℃ vs. TH/TRPA1 ST 30℃	-0.1244 to 0.1244	>0.9999
	0/10	0/10	1/10	1/10	2/10	5/10	8/10	10/10					0	0	0.1	0.1	0.2	0.5	0.8	1
	0/10	0/10	0/10	0/10	2/10	7/10	10/10	10/10					0	0	0	0	0.2	0.7	1	1
	0/10	0/10	1/10	1/10	3/10	5/10	10/10	10/10					0	0	0.1	0.1	0.3	0.5	1	1
												Mean	0	0	0.05	0.075	0.275	0.6	0.95	1
												SEM	0	0	0.0288675	0.025	0.0478714	0.057735	0.05	0
