# Supplementary material for: Hugin-AstA circuitry is a novel central energy sensor that directly regulates sweet sensation in Drosophila and mouse
Source: eLife. 2026 May 5;14:RP108551. doi: 10.7554/eLife.108551 (PMC13143273; doi:10.7554/eLife.108551)
Supplement: Figure 1—figure supplement 3—source data 1. [file elife-108551-fig1-figsupp3-data1.xlsx]

## Sheet: A
			20℃							20℃
			w/TRPA1	ilp2/TRPA1						ilp2/TRPA1	w/TRPA1
			4	5	6					1	2	3	4
			1.731	1.378	0.159				A	1.661	2.064	0.217
			1.683	1.633	0.158				B	1.651	2.181	0.204	0.2105
			1.553	1.522	0.051				C	1.711	1.974	0.05
			1.394	1.667	0.05				D	1.809	2.005	0.05	0.05
			1.426	1.425	0.047				E	1.792	2.071	0.047
			1.67	1.534	0.046				F	1.749	2.012	0.047
			1.458	1.523	0.047				G	1.797	2.096	0.047
			1.54	1.642	0.047				H	1.665	2.066	0.047
										ilp2/TRPA1	w/TRPA1
			w/TRPA1	ilp2/TRPA1						55.7075	69.643
			78.5789	62.0729						55.3617	73.6888
			76.3345	73.9965						57.4364	66.5308
			70.2558	68.8062						60.8252	67.6028
			62.8211	75.5863						60.2374	69.885
			64.3174	64.2706						58.7505	67.8449
			75.7266	69.3674						60.4103	70.7495
			65.8137	68.853						55.8458	69.7121
			69.6479	74.4174					Mean	58.0718	69.4571
									TTEST		8.11066e-08
		mean	70.437	69.6713							****
		TTEST		0.781638					SEM	0.807263	0.784459
		SEM	2.09819	1.71461
					Bonferroni's multiple comparisons test	95% confidence interval	P value	F (DFn, DFd)
					w/TRPA1 20℃ vs. ilp2/TRPA1 20℃	-4.148 to 5.680	>0.9999	F (3, 28) = 16.21
					w/TRPA1 30℃ vs. ilp2/TRPA1 30℃	-16.30 to -6.471	<0.0001

## Sheet: B
	6.25	12.5	25	50	100	200	400	800					6.25	12.5	25	50	100	200	400	800
w1118/TRPA1 fed 30℃	0/10	0/10	0/10	0/10	0/10	0/10	3/10	7/10				w1118/TRPA1 fed 30℃	0	0	0	0	0	0	0.3	0.7
	0/10	0/10	0/10	0/10	0/10	0/10	2/10	5/10					0	0	0	0	0	0	0.2	0.5
	0/10	0/10	0/10	0/10	0/10	0/10	1/10	5/10					0	0	0	0	0	0	0.1	0.5
	0/10	0/10	0/10	0/10	0/10	1/10	2/10	6/10					0	0	0	0	0	0.1	0.2	0.6
												mean	0	0	0	0	0	0.025	0.2	0.575
												SEM	0	0	0	0	0	0.025	0.0408248	0.0478714
ilp2/TRPA1 fed 30℃	0/10	0/10	0/10	0/10	1/10	3/10	5/10	9/10				ilp2/TRPA1 fed 30℃	0	0	0	0	0.1	0.3	0.5	0.9
	0/10	0/10	0/10	0/10	0/10	0/10	4/10	10/10					0	0	0	0	0	0	0.4	1
	0/10	0/10	0/10	0/10	1/10	2/10	6/10	9/10					0	0	0	0	0.1	0.2	0.6	0.9
	0/10	0/10	0/10	0/10	0/10	2/10	5/10	9/10					0	0	0	0	0	0.2	0.5	0.9
												mean	0	0	0	0	0.05	0.175	0.5	0.925
												SEM	0	0	0	0	0.0288675	0.0629153	0.0408248	0.025
													Bonferroni's multiple comparisons test	95% confidence interval	P value	F (DFn, DFd)
													w1118/TRPA1 fed 30℃ - ilp2/TRPA1 fed 30℃			F (7, 48) = 14.42			Bonferroni's multiple comparisons test	95% confidence interval	P value	F (DFn, DFd)
													Row 1	-0.1092 to 0.1092	>0.9999				w1118/TRPA1 fed 30℃ vs. ilp2/TRPA1 fed 30℃	-0.1382 to -0.07426	<0.0001	F (14, 72) = 8.971
													Row 2	-0.1092 to 0.1092	>0.9999
													Row 3	-0.1092 to 0.1092	>0.9999
													Row 4	-0.1092 to 0.1092	>0.9999
													Row 5	-0.1592 to 0.05923	>0.9999
													Row 6	-0.2592 to -0.04077	0.0022
													Row 7	-0.4092 to -0.1908	<0.0001
													Row 8	-0.4592 to -0.2408	<0.0001

## Sheet: C
	6.25	12.5	25	50	100	200	400	800					6.25	12.5	25	50	100	200	400	800
w1118/TRPA1 ST 30℃	0/10	0/10	1/10	1/10	2/10	4/10	9/10	10/10				/TRPA1 ST 30℃	0	0	0.1	0.1	0.2	0.4	0.9	1
	0/10	0/10	0/10	0/10	1/10	3/10	8/10	10/10					0	0	0	0	0.1	0.3	0.8	1
	0/10	0/10	1/10	1/10	3/10	4/10	10/10	10/10					0	0	0.1	0.1	0.3	0.4	1	1
	0/10	0/10	0/10	0/10	1/10	4/10	9/10	10/10					0	0	0	0	0.1	0.4	0.9	1
												Mean	0	0	0.05	0.05	0.175	0.375	0.9	1
												SEM	0	0	0.0288675	0.0288675	0.0478714	0.025	0.0408248	0
ilp2/TRPA1 ST 30℃	0/10	0/10	0/10	1/10	3/10	7/10	10/10	10/10				ilp2/TRPA1 ST 30℃	0	0	0	0.1	0.3	0.7	1	1
	0/10	0/10	0/10	0/10	2/10	4/10	9/10	10/10					0	0	0	0	0.2	0.4	0.9	1
	0/10	0/10	0/10	0/10	1/10	5/10	9/10	10/10					0	0	0	0	0.1	0.5	0.9	1
	0/10	0/10	0/10	1/10	2/10	5/10	9/10	10/10					0	0	0	0.1	0.2	0.5	0.9	1
												Mean	0	0	0	0.05	0.2	0.525	0.925	1
												SEM	0	0	0	0.0288675	0.0408248	0.0629153	0.025	0
												Bonferroni's multiple comparisons test	95% confidence interval	P value	F (DFn, DFd)			Bonferroni's multiple comparisons test	95% confidence interval	P value	F (DFn, DFd)
												/TRPA1 ST 30℃ - ilp2/TRPA1 ST 30℃			F (14, 72) = 1.312			/TRPA1 ST 30℃ vs. ilp2/TRPA1 ST 30℃	-0.05213 to 0.01463	0.4053	F (14, 72) = 1.312
												Row 1	-0.1168 to 0.1168	>0.9999
												Row 2	-0.1168 to 0.1168	>0.9999
												Row 3	-0.06677 to 0.1668	>0.9999
												Row 4	-0.1168 to 0.1168	>0.9999
												Row 5	-0.1418 to 0.09177	>0.9999
												Row 6	-0.2668 to -0.03323	0.0048
												Row 7	-0.1418 to 0.09177	>0.9999
												Row 8	-0.1168 to 0.1168	>0.9999
