# Supplementary material for: Hugin-AstA circuitry is a novel central energy sensor that directly regulates sweet sensation in Drosophila and mouse
Source: eLife. 2026 May 5;14:RP108551. doi: 10.7554/eLife.108551 (PMC13143273; doi:10.7554/eLife.108551)
Supplement: Figure 1—figure supplement 4—source data 1. [file elife-108551-fig1-figsupp4-data1.xlsx]

## Sheet: A
		6.25	12.5	25	50	100	200	400	800					6.25	12.5	25	50	100	200	400	800
	st	0/10	2/10	4/10	8/10	10/10	10/10	10/10	10/10				st	0	0.2	0.4	0.8	1	1	1	1
		1/10	1/10	6/10	9/10	10/10	10/10	10/10	10/10					0.1	0.1	0.6	0.9	1	1	1	1
		0/10	0/10	3/10	5/10	9/10	10/10	10/10	10/10					0	0	0.3	0.5	0.9	1	1	1
		0/10	0/10	3/10	6/10	9/10	10/10	10/10	10/10					0	0	0.3	0.6	0.9	1	1	1
	refed sucrose	0/10	0/10	0/10	0/10	0/10	2/10	7/10	8/10				refed sucrose	0	0	0	0	0	0.2	0.7	0.8
		0/10	0/10	0/10	0/10	2/10	4/10	8/10	10/10					0	0	0	0	0.2	0.4	0.8	1
		0/10	0/10	0/10	0/10	0/10	3/10	8/10	9/10					0	0	0	0	0	0.3	0.8	0.9
		0/10	0/10	0/10	0/10	1/10	3/10	9/10	10/10					0	0	0	0	0.1	0.3	0.9	1
	refed fructose	0/10	0/10	0/10	1/10	3/10	6/10	9/10	10/10				refed 果	0	0	0	0.1	0.3	0.6	0.9	1
		0/10	0/10	0/10	0/10	2/10	4/10	8/10	10/10					0	0	0	0	0.2	0.4	0.8	1
		0/10	0/10	0/10	0/10	2/10	5/10	10/10	10/10					0	0	0	0	0.2	0.5	1	1
		0/10	0/10	0/10	1/10	2/10	5/10	9/10	10/10					0	0	0	0.1	0.2	0.5	0.9	1
	refed trehalose	0/10	0/10	0/10	0/10	1/10	3/10	9/10	10/10				refed 海	0	0	0	0	0.1	0.3	0.9	1
		0/10	0/10	0/10	0/10	3/10	5/10	9/10	10/10					0	0	0	0	0.3	0.5	0.9	1
		0/10	0/10	0/10	0/10	3/10	6/10	9/10	10/10					0	0	0	0	0.3	0.6	0.9	1
		0/10	0/10	0/10	0/10	1/10	4/10	8/10	10/10					0	0	0	0	0.1	0.4	0.8	1
	refed sorbitol	0/10	0/10	0/10	0/10	5/10	10/10	10/10	10/10				refed 山	0	0	0	0	0.5	1	1	1
		0/10	0/10	0/10	0/10	4/10	9/10	10/10	10/10					0	0	0	0	0.4	0.9	1	1
		0/10	0/10	0/10	2/10	3/10	9/10	10/10	10/10					0	0	0	0.2	0.3	0.9	1	1
		0/10	0/10	0/10	3/10	6/10	10/10	10/10	10/10					0	0	0	0.3	0.6	1	1	1
		Bonferroni's multiple comparisons test	95% confidence interval	P value	F (DFn, DFd)
		ST vs. refed sucrose	0.3371 to 0.4254	<0.0001	F (28, 120) = 19.63							Bonferroni's multiple comparisons test	95% confidence interval	P value	F (DFn, DFd)			Row 1	95% confidence interval			P value	F (DFn, DFd)
		ST vs. refed fructose	0.2652 to 0.3535	<0.0001								refed sucrose vs. refed fructose	-0.1160 to -0.02770	0.0003	F (28, 120) = 19.63			st vs. refed sucrose	-0.09993 to 0.1499	No	ns	>0.9999	F (28, 120) = 19.63
		ST vs. refed trehalose	0.2840 to 0.3723	<0.0001								refed sucrose vs. refed trehalose	-0.09730 to -0.008955	0.0113				st vs. refed fructose	-0.09993 to 0.1499	No	ns	>0.9999
		ST vs. refed sorbitol	0.1590 to 0.2473	<0.0001								refed sucrose vs. refed sorbitol	-0.2223 to -0.1340	<0.0001				st vs. refed trehalose	-0.09993 to 0.1499	No	ns	>0.9999
																		st vs. refed sorbitol	-0.09993 to 0.1499	No	ns	>0.9999
																		Row 2
																		st vs. refed sucrose	-0.04993 to 0.1999	No	ns	0.5222
																		st vs. refed fructose	-0.04993 to 0.1999	No	ns	0.5222
																		st vs. refed trehalose	-0.04993 to 0.1999	No	ns	0.5222
																		st vs. refed sorbitol	-0.04993 to 0.1999	No	ns	0.5222
																		Row 3
																		st vs. refed sucrose	0.2751 to 0.5249	Yes	****	<0.0001
																		st vs. refed fructose	0.2751 to 0.5249	Yes	****	<0.0001
																		st vs. refed trehalose	0.2751 to 0.5249	Yes	****	<0.0001
																		st vs. refed sorbitol	0.2751 to 0.5249	Yes	****	<0.0001
																		Row 4
																		st vs. refed sucrose	0.5751 to 0.8249	Yes	****	<0.0001
																		st vs. refed fructose	0.5251 to 0.7749	Yes	****	<0.0001
																		st vs. refed trehalose	0.5751 to 0.8249	Yes	****	<0.0001
																		st vs. refed sorbitol	0.4501 to 0.6999	Yes	****	<0.0001
																		Row 5
																		st vs. refed sucrose	0.7501 to 0.9999	Yes	****	<0.0001
																		st vs. refed fructose	0.6001 to 0.8499	Yes	****	<0.0001
																		st vs. refed trehalose	0.6251 to 0.8749	Yes	****	<0.0001
																		st vs. refed sorbitol	0.3751 to 0.6249	Yes	****	<0.0001
																		Row 6
																		st vs. refed sucrose	0.5751 to 0.8249	Yes	****	<0.0001
																		st vs. refed fructose	0.3751 to 0.6249	Yes	****	<0.0001
																		st vs. refed trehalose	0.4251 to 0.6749	Yes	****	<0.0001
																		st vs. refed sorbitol	-0.07493 to 0.1749	No	ns	>0.9999
																		Row 7
																		st vs. refed sucrose	0.07507 to 0.3249	Yes	***	0.0004
																		st vs. refed fructose	-0.02493 to 0.2249	No	ns	0.1783
																		st vs. refed trehalose	6.705e-005 to 0.2499	Yes	*	0.0498
																		st vs. refed sorbitol	-0.1249 to 0.1249	No	ns	>0.9999
																		Row 8
																		st vs. refed sucrose	-0.04993 to 0.1999	No	ns	0.5222
																		st vs. refed fructose	-0.1249 to 0.1249	No	ns	>0.9999
																		st vs. refed trehalose	-0.1249 to 0.1249	No	ns	>0.9999
																		st vs. refed sorbitol	-0.1249 to 0.1249	No	ns	>0.9999

## Sheet: B
			6.25	12.5	25	50	100	200	400	800					6.25	12.5	25	50	100	200	400	800
		st	0/10	2/10	4/10	8/10	10/10	10/10	10/10	10/10				st	0	0.2	0.4	0.8	1	1	1	1
			1/10	1/10	6/10	9/10	10/10	10/10	10/10	10/10					0.1	0.1	0.6	0.9	1	1	1	1
			0/10	0/10	3/10	5/10	9/10	10/10	10/10	10/10					0	0	0.3	0.5	0.9	1	1	1
			0/10	0/10	3/10	6/10	9/10	10/10	10/10	10/10					0	0	0.3	0.6	0.9	1	1	1
		refed sucrose	0/10	0/10	0/10	0/10	0/10	2/10	7/10	8/10				refed sucrose	0	0	0	0	0	0.2	0.7	0.8
			0/10	0/10	0/10	0/10	2/10	4/10	8/10	10/10					0	0	0	0	0.2	0.4	0.8	1
			0/10	0/10	0/10	0/10	0/10	3/10	8/10	9/10					0	0	0	0	0	0.3	0.8	0.9
			0/10	0/10	0/10	0/10	1/10	3/10	9/10	10/10					0	0	0	0	0.1	0.3	0.9	1
		refed 阿	0/10	0/10	0/10	0/10	4/10	6/10	10/10	10/10				refed 阿	0	0	0	0	0.4	0.6	1	1
			0/10	0/10	0/10	2/10	3/10	6/10	10/10	10/10					0	0	0	0.2	0.3	0.6	1	1
			0/10	0/10	0/10	0/10	3/10	8/10	10/10	10/10					0	0	0	0	0.3	0.8	1	1
			0/10	0/10	0/10	1/10	2/10	4/10	10/10	10/10					0	0	0	0.1	0.2	0.4	1	1
		refed 山	0/10	0/10	0/10	0/10	5/10	10/10	10/10	10/10				refed 山	0	0	0	0	0.5	1	1	1
			0/10	0/10	0/10	0/10	4/10	9/10	10/10	10/10					0	0	0	0	0.4	0.9	1	1
			0/10	0/10	0/10	2/10	3/10	9/10	10/10	10/10					0	0	0	0.2	0.3	0.9	1	1
			0/10	0/10	0/10	3/10	6/10	10/10	10/10	10/10					0	0	0	0.3	0.6	1	1	1
											Bonferroni's multiple comparisons test	95% confidence interval	P value	F (DFn, DFd)			Row 1	95% confidence interval			P value	F (DFn, DFd)
		Bonferroni's multiple comparisons test	95% confidence interval	P value	F (DFn, DFd)						refed sucrose vs. refed sorbitol	-0.2244 to -0.1318	<0.0001	F (21, 96) = 19.26			st vs. refed sucrose	-0.1060 to 0.1560	No	ns	>0.9999	F (21, 96) = 19.26
		ST vs. refed sucrose	0.3349 to 0.4276	<0.0001	F (21, 96) = 19.26						refed sucrose vs. refed arabinose	-0.1557 to -0.06306	<0.0001				st vs. refed 阿	-0.1060 to 0.1560	No	ns	>0.9999
		ST vs. refed sorbitol	0.1568 to 0.2494	<0.0001													st vs. refed 山	-0.1060 to 0.1560	No	ns	>0.9999
		ST vs. refed arabinose	0.2256 to 0.3182	<0.0001													Row 2
																	st vs. refed sucrose	-0.05601 to 0.2060	No	ns	0.4987
																	st vs. refed 阿	-0.05601 to 0.2060	No	ns	0.4987
																	st vs. refed 山	-0.05601 to 0.2060	No	ns	0.4987
																	Row 3
																	st vs. refed sucrose	0.2690 to 0.5310	Yes	****	<0.0001
																	st vs. refed 阿	0.2690 to 0.5310	Yes	****	<0.0001
																	st vs. refed 山	0.2690 to 0.5310	Yes	****	<0.0001
																	Row 4
																	st vs. refed sucrose	0.5690 to 0.8310	Yes	****	<0.0001
																	st vs. refed 阿	0.4940 to 0.7560	Yes	****	<0.0001
																	st vs. refed 山	0.4440 to 0.7060	Yes	****	<0.0001
																	Row 5
																	st vs. refed sucrose	0.7440 to 1.006	Yes	****	<0.0001
																	st vs. refed 阿	0.5190 to 0.7810	Yes	****	<0.0001
																	st vs. refed 山	0.3690 to 0.6310	Yes	****	<0.0001
																	Row 6
																	st vs. refed sucrose	0.5690 to 0.8310	Yes	****	<0.0001
																	st vs. refed 阿	0.2690 to 0.5310	Yes	****	<0.0001
																	st vs. refed 山	-0.08101 to 0.1810	No	ns	>0.9999
																	Row 7
																	st vs. refed sucrose	0.06899 to 0.3310	Yes	**	0.001
																	st vs. refed 阿	-0.1310 to 0.1310	No	ns	>0.9999
																	st vs. refed 山	-0.1310 to 0.1310	No	ns	>0.9999
																	Row 8
																	st vs. refed sucrose	-0.05601 to 0.2060	No	ns	0.4987
																	st vs. refed 阿	-0.1310 to 0.1310	No	ns	>0.9999
																	st vs. refed 山	-0.1310 to 0.1310	No	ns	>0.9999

## Sheet: C
fructose		6.25	12.5	25	50	100	200	400	800					fructose		6.25	12.5	25	50	100	200	400	800			Bonferroni's multiple comparisons test	95% confidence interval	P value	F (DFn, DFd)
	ST	0/10	1/10	2/10	3/10	6/10	8/10	10/10	10/10						ST	0	0.1	0.2	0.3	0.6	0.8	1	1			ST vs. fed	0.1323 to 0.2115	<0.0001	F (14, 72) = 4.140
		1/10	2/10	2/10	5/10	7/10	10/10	10/10	10/10							0.1	0.2	0.2	0.5	0.7	1	1	1			ST vs. refed	0.1385 to 0.2177	<0.0001
		2/10	2/10	2/10	3/10	5/10	8/10	9/10	10/10							0.2	0.2	0.2	0.3	0.5	0.8	0.9	1
		1/10	1/10	2/10	4/10	5/10	6/10	9/10	10/10							0.1	0.1	0.2	0.4	0.5	0.6	0.9	1			Bonferroni's multiple comparisons test	95% confidence interval	P value	F (DFn, DFd)
																										Row 1			F (14, 72) = 4.140
															Mean	0.1	0.15	0.2	0.375	0.575	0.8	0.95	1			ST vs. fed	-0.03705 to 0.1871	0.2597
															SEM	0.0408248	0.0288675	0	0.0478714	0.0478714	0.0816497	0.0288675	0			ST vs. refed	-0.01205 to 0.2121	0.0894
																										Row 2
																										ST vs. fed	0.01295 to 0.2371	0.0255
		6.25	12.5	25	50	100	200	400	800							6.25	12.5	25	50	100	200	400	800			ST vs. refed	0.01295 to 0.2371	0.0255
	fed	0/10	0/10	1/10	1/10	3/10	5/10	9/10	9/10						fed	0	0	0.1	0.1	0.3	0.5	0.9	0.9			Row 3
		0/10	0/10	0/10	1/10	2/10	4/10	8/10	10/10							0	0	0	0.1	0.2	0.4	0.8	1			ST vs. fed	0.01295 to 0.2371	0.0255
		0/10	0/10	1/10	1/10	4/10	5/10	9/10	9/10							0	0	0.1	0.1	0.4	0.5	0.9	0.9			ST vs. refed	0.01295 to 0.2371	0.0255
		1/10	1/10	1/10	2/10	3/10	3/10	8/10	10/10							0.1	0.1	0.1	0.2	0.3	0.3	0.8	1			Row 4
																										ST vs. fed	0.1379 to 0.3621	<0.0001
															Mean	0.025	0.025	0.075	0.125	0.3	0.425	0.85	0.95			ST vs. refed	0.08795 to 0.3121	0.0002
															SEM	0.025	0.025	0.025	0.025	0.0408248	0.0478714	0.0288675	0.0288675			Row 5
																										ST vs. fed	0.1629 to 0.3871	<0.0001
		6.25	12.5	25	50	100	200	400	800							6.25	12.5	25	50	100	200	400	800			ST vs. refed	0.2379 to 0.4621	<0.0001
	refed	0/10	0/10	1/10	2/10	3/10	4/10	8/10	10/10						refed	0	0	0.1	0.2	0.3	0.4	0.8	1			Row 6
		0/10	0/10	0/10	1/10	1/10	4/10	8/10	10/10							0	0	0	0.1	0.1	0.4	0.8	1			ST vs. fed	0.2629 to 0.4871	<0.0001
		0/10	1/10	1/10	2/10	3/10	5/10	9/10	9/10							0	0.1	0.1	0.2	0.3	0.5	0.9	0.9			ST vs. refed	0.2629 to 0.4871	<0.0001
		0/10	0/10	1/10	2/10	2/10	4/10	8/10	10/10							0	0	0.1	0.2	0.2	0.4	0.8	1			Row 7
																										ST vs. fed	-0.01205 to 0.2121	0.0894
															Mean	0	0.025	0.075	0.175	0.225	0.425	0.825	0.975			ST vs. refed	0.01295 to 0.2371	0.0255
															SEM	0	0.025	0.025	0.025	0.0478714	0.025	0.025	0.025			Row 8
																										ST vs. fed	-0.06205 to 0.1621	0.6209
																										ST vs. refed	-0.08705 to 0.1371	>0.9999

## Sheet: D
trehalose		6.25	12.5	25	50	100	200	400	800					trehalose		6.25	12.5	25	50	100	200	400	800		Bonferroni's multiple comparisons test	95% confidence interval	P value	F (DFn, DFd)
	ST	0/10	0/10	0/10	0/10	2/10	3/10	6/10	9/10						ST	0	0	0	0	0.2	0.3	0.6	0.9		ST vs. fed	0.1003 to 0.1684	<0.0001	F (14, 72) = 4.987
		0/10	0/10	0/10	2/10	3/10	3/10	5/10	8/10							0	0	0	0.2	0.3	0.3	0.5	0.8		ST vs. refed	0.07844 to 0.1466	<0.0001
		0/10	0/10	0/10	1/10	1/10	1/10	6/10	7/10							0	0	0	0.1	0.1	0.1	0.6	0.7
		0/10	0/10	0/10	2/10	3/10	4/10	5/10	8/10							0	0	0	0.2	0.3	0.4	0.5	0.8
															Mean	0	0	0	0.125	0.225	0.275	0.55	0.8		Bonferroni's multiple comparisons test	95% confidence interval	P value	F (DFn, DFd)
															SEM	0	0	0	0.0478714	0.0478714	0.0629153	0.0288675	0.0408248		Row 1			F (14, 72) = 4.987
																									ST vs. fed	-0.09633 to 0.09633	>0.9999
		6.25	12.5	25	50	100	200	400	800							6.25	12.5	25	50	100	200	400	800		ST vs. refed	-0.09633 to 0.09633	>0.9999
	fed	0/10	0/10	0/10	0/10	1/10	1/10	3/10	7/10						fed	0	0	0	0	0.1	0.1	0.3	0.7		Row 2
		0/10	0/10	0/10	0/10	0/10	0/10	1/10	5/10							0	0	0	0	0	0	0.1	0.5		ST vs. fed	-0.09633 to 0.09633	>0.9999
		0/10	0/10	0/10	0/10	0/10	1/10	2/10	5/10							0	0	0	0	0	0.1	0.2	0.5		ST vs. refed	-0.09633 to 0.09633	>0.9999
		0/10	0/10	0/10	0/10	0/10	1/10	3/10	6/10							0	0	0	0	0	0.1	0.3	0.6		Row 3
																									ST vs. fed	-0.09633 to 0.09633	>0.9999
															Mean	0	0	0	0	0.025	0.075	0.225	0.575		ST vs. refed	-0.09633 to 0.09633	>0.9999
															SEM	0	0	0	0	0.025	0.025	0.0478714	0.0478714		Row 4
																									ST vs. fed	0.02867 to 0.2213	0.0081
																									ST vs. refed	0.02867 to 0.2213	0.0081
		6.25	12.5	25	50	100	200	400	800							6.25	12.5	25	50	100	200	400	800		Row 5
	refed	0/10	0/10	0/10	0/10	1/10	2/10	3/10	6/10						refed	0	0	0	0	0.1	0.2	0.3	0.6		ST vs. fed	0.1037 to 0.2963	<0.0001
		0/10	0/10	0/10	0/10	0/10	1/10	2/10	5/10							0	0	0	0	0	0.1	0.2	0.5		ST vs. refed	0.07867 to 0.2713	0.0002
		0/10	0/10	0/10	0/10	0/10	1/10	3/10	7/10							0	0	0	0	0	0.1	0.3	0.7		Row 6
		0/10	0/10	0/10	0/10	1/10	1/10	3/10	7/10							0	0	0	0	0.1	0.1	0.3	0.7		ST vs. fed	0.1037 to 0.2963	<0.0001
																									ST vs. refed	0.05367 to 0.2463	0.0013
															Mean	0	0	0	0	0.05	0.125	0.275	0.625		Row 7
															SEM	0	0	0	0	0.0288675	0.025	0.025	0.0478714		ST vs. fed	0.2287 to 0.4213	<0.0001
																									ST vs. refed	0.1787 to 0.3713	<0.0001
																									Row 8
																									ST vs. fed	0.1287 to 0.3213	<0.0001
																									ST vs. refed	0.07867 to 0.2713	0.0002
