# Supplementary material for: Hugin-AstA circuitry is a novel central energy sensor that directly regulates sweet sensation in Drosophila and mouse
Source: eLife. 2026 May 5;14:RP108551. doi: 10.7554/eLife.108551 (PMC13143273; doi:10.7554/eLife.108551)
Supplement: Figure 1—figure supplement 5—source data 1. [file elife-108551-fig1-figsupp5-data1.xlsx]

## Sheet: Sheet1
				ST	fed											refed glucose
		1	2	3	4	5	6	7	8	9	10	11	12			2
	A				0.181	0.048								505		0.535	0.406
	B			0.118	0.2	0.054	0.051							505		0.71	0.414	0.41
	C			0.119	0.228	0.313								505		0.841	0.044
	D			0.155	0.231	0.312	0.3125							505		0.746	0.045	0.0445
	E			0.101	0.205	0.049								505		0.758	0.057
	F			0.15	0.204	0.053								505		0.761	0.053
	G			0.069	0.17	0.048								505		0.601	0.049
	H					0.048								505			0.05
w1118果蝇饥饿12h提取血淋巴测血糖																refed glucose
																53.6799
																72.8317
																87.1683
				ST	fed	refed										76.7715
			mM	28.4398	55.1816	53.6799										78.0848
				28.8642	63.2467	72.8317										78.4131
				44.1453	75.1319	87.1683										60.9029
				21.2237	76.4054	76.7715
				42.0229	65.369	78.0848
				7.64054	64.9446	78.4131
					50.5124	60.9029
			Mean	28.7228	65.935
			TTEST		0.000166376
					***
			SEM	5.52433	3.58473
								Bonferroni's multiple comparisons test	95% confidence interval	P value	F (DFn, DFd)
								ST vs. fed	-51.39 to -19.97	<0.0001	F (2, 17) = 26.03
								ST vs. refed	-59.54 to -28.12	<0.0001
