# Supplementary material for: Hugin-AstA circuitry is a novel central energy sensor that directly regulates sweet sensation in Drosophila and mouse
Source: eLife. 2026 May 5;14:RP108551. doi: 10.7554/eLife.108551 (PMC13143273; doi:10.7554/eLife.108551)
Supplement: Figure 1—figure supplement 6—source data 1. [file elife-108551-fig1-figsupp6-data1.xlsx]

## Sheet: B
	LK-GC6m 50mM glucose001.nd2	LK-GC6m50 mM glucose002.nd2	LK-GC6m 50mM glucose003.nd2	LK-GC6m 50mM glucose004.nd2	LK-GC6m 50mM glucose007.nd2	LK-GC6m 50mM glucose008.nd2					LK-GC6m 50mM glucose001.nd2	LK-GC6m50 mM glucose002.nd2	LK-GC6m 50mM glucose003.nd2	LK-GC6m 50mM glucose004.nd2	LK-GC6m 50mM glucose007.nd2	LK-GC6m 50mM glucose008.nd2						Peak
time（sec）	raw data	raw data	raw data	raw data	raw data	raw data					F/F0	F/F0	F/F0	F/F0	F/F0	F/F0	mean	SEM				0.131429
0	164.698	653.958	39.4542	114.43	161.325	299.835					0.118925	0.0591261	-0.0325429	-0.0353226	0.165573	0.155146	0.0718174	0.0367351				-0.112925
3	146.26	640.76	40.292	146.882	122.65	275.626					-0.00634018	0.0377503	-0.0119992	0.238253	-0.113854	0.0618794	0.0342816	0.0476495				0.0728877
6	135.05	681.855	36.1889	110.172	140.775	277.6					-0.0824954	0.104307	-0.112611	-0.0712195	0.0170992	0.0694841	-0.0125727	0.0363368				0.448104
9	139.902	627.042	41.7137	152.882	143.575	306.626					-0.0495291	0.015534	0.0228623	0.288835	0.0373292	0.18131	0.0827236	0.0515915				0.566741
12	156.019	653.794	39.2805	129.527	168.475	277.313					0.059964	0.0588603	-0.0368022	0.0919476	0.217232	0.0683784	0.0765966	0.0334325				0.0142412
15	144.495	674.943	45.8779	143.495	140.975	305.539					-0.0183265	0.0931121	0.124973	0.209699	0.0185442	0.177123	0.100854	0.0361869
18	156.331	640.687	39.376	110.505	157.162	268.017					0.062083	0.0376329	-0.0344604	-0.0684089	0.135499	0.0325661	0.0274853	0.0294537
21	132.748	629.924	45.8893	106.086	176.95	245.6					-0.0981375	0.0202009	0.125252	-0.105666	0.278463	-0.0537994	0.027719	0.0612967
24	145.964	611.195	43.4294	115.462	154.787	233.13					-0.00834572	-0.0101319	0.0649331	-0.02662	0.118339	-0.10184	0.00605584	0.0312265
27	154.581	665.279	45.7977	114.925	129.863	254.861					0.0501939	0.0774605	0.123006	-0.031153	-0.0617436	-0.0181207	0.0232739	0.0291612
30	151.262	572.53	36.4408	94.871	103.812	260.678					0.0276452	-0.0727508	-0.106435	-0.200211	-0.249955	0.00429142	-0.0995691	0.0449005
33	139.531	627.473	45.6718	109.011	121.375	236.678					-0.052053	0.0162325	0.119919	-0.0810096	-0.123066	-0.0881712	-0.0346914	0.0363385
36	146.812	612.134	38.3511	134.107	128.012	242.765					-0.00258728	-0.00861114	-0.059592	0.130563	-0.0751099	-0.0647207	-0.013343	0.0313267
39	157.295	600.878	39.8435	120.71	145.4	256.452					0.0686343	-0.0268405	-0.0229969	0.0176162	0.0505148	-0.0119901	0.0124896	0.0163603
42	146.419	573.779	43.313	110.312	125.775	246.07					-0.00525589	-0.0707295	0.0620788	-0.070041	-0.0912758	-0.0519902	-0.0378689	0.023252
45	147.062	585.683	36.9599	95.6344	139.988	239.261					-0.000888825	-0.0514492	-0.0937057	-0.193776	0.0114095	-0.0782214	-0.0677719	0.0303689
48	153.048	611.58	44.7557	114.527	153.363	255.8					0.0397769	-0.00950757	0.0974553	-0.0345065	0.108044	-0.0145028	0.0311265	0.0247867
51	144.433	584	45.0763	102.925	125.162	233.096					-0.018747	-0.0541753	0.105317	-0.132316	-0.0957011	-0.101974	-0.0495994	0.0349678
54	138.286	591.504	31.5782	147.118	118.237	240.191					-0.0605127	-0.0420224	-0.22567	0.240248	-0.145734	-0.074637	-0.0513881	0.0645597
57	147.195	591.172	37.8015	112.624	119.65	232.452					1.67904e-05	-0.0425601	-0.0730688	-0.050551	-0.135529	-0.104453	-0.0676908	0.0195721
60	143.657	536.294	39.3168	104.817	129.262	263.261					-0.0240197	-0.131438	-0.0359121	-0.116362	-0.0660786	0.0142412	-0.0599283	0.0228791
63	160.798	547.725	38.7481	135.43	118.688	186.687					0.092429	-0.112925	-0.0498572	0.141713	-0.142483	-0.280768	-0.0586484	0.0638638
66	163.888	485.496	36.6985	120.828	149.15	236.904					0.113425	-0.213708	-0.100115	0.0186135	0.0776085	-0.0873005	-0.0319128	0.0504777
69	148.955	474.26	38.7405	99.7097	119.75	252.009					0.0119712	-0.231907	-0.0500435	-0.15942	-0.134806	-0.0291092	-0.0988857	0.0375024
72	143.269	478.458	43.7538	86.3011	105.612	231.357					-0.0266571	-0.225107	0.0728877	-0.272458	-0.23695	-0.108674	-0.132826	0.055686
75	118.471	508.534	41.5859	126.86	100.812	234.052					-0.195127	-0.176397	0.0197286	0.0694666	-0.27163	-0.0982885	-0.108708	0.0538344
78	125.691	476.389	39.9237	107.882	113.45	232.313					-0.146082	-0.228458	-0.0210303	-0.0905274	-0.180324	-0.104989	-0.128568	0.0297382
81	137.469	477.79	38.126	111.645	113.225	220.261					-0.0660605	-0.226189	-0.0651117	-0.0588001	-0.18195	-0.151421	-0.124922	0.0292252
84	141.255	493.195	31.8893	107.258	115.312	210.591					-0.0403412	-0.20124	-0.218042	-0.0957845	-0.166867	-0.188674	-0.151825	0.0282724
87	134.012	497.55	36.2672	99.9785	149.113	228.043					-0.0895481	-0.194187	-0.110691	-0.157154	0.0773376	-0.121438	-0.09928	0.0384128
90	134.588	506.126	35.0725	83.1075	123.45	200.104					-0.0856335	-0.180297	-0.139987	-0.299381	-0.108074	-0.229076	-0.173741	0.0327133
93	164.333	517.679	36.4714	79.8495	122.875	182.27					0.11645	-0.161586	-0.105684	-0.326847	-0.112228	-0.297787	-0.147947	0.0652203
96	142.336	502.973	32.7595	80.0538	103.737	243.87					-0.0329977	-0.185403	-0.196704	-0.325124	-0.250497	-0.0604659	-0.175199	0.0454968
99	131.236	487.561	25.4618	96.4624	103.537	248.278					-0.108409	-0.210364	-0.375651	-0.186795	-0.251942	-0.0434809	-0.196107	0.0471272
102	146.643	470.378	26.3378	47.6559	100.725	195.756					-0.00373543	-0.238193	-0.35417	-0.598248	-0.272262	-0.245827	-0.285406	0.07872
105	166.538	456.519	26.1756	59.6237	117.737	219.365					0.131429	-0.260639	-0.358148	-0.497356	-0.149347	-0.154872	-0.214822	0.0876047
108	155.083	474.966	27.6813	56.086	92.85	207.948					0.0536071	-0.230763	-0.321226	-0.527179	-0.329159	-0.198859	-0.25893	0.0780709
111	111.829	501.244	22.458	48.914	118.362	184.174					-0.240257	-0.188203	-0.449307	-0.587641	-0.144831	-0.29045	-0.316782	0.0691801
114	146.31	474.16	20.5592	51.4731	113.438	200.791					-0.00600049	-0.232068	-0.495868	-0.566068	-0.180414	-0.22643	-0.284475	0.0853373
117	147.357	462.702	24.7786	45.1075	110.85	186.887					0.00111671	-0.250625	-0.392404	-0.619731	-0.199109	-0.279998	-0.290125	0.0844333
120	120.543	469.29	22.7004	66.3333	99.45	257.93					-0.181054	-0.239955	-0.443363	-0.440792	-0.281474	-0.00629516	-0.265489	0.0677221
123	131.59	445.382	20.5687	43.6882	94.3375	225.739					-0.105999	-0.278676	-0.495635	-0.631696	-0.318412	-0.130316	-0.326789	0.0839072
126	126.674	480.813	19.3645	41.8495	119.487	188.2					-0.139402	-0.221293	-0.525163	-0.647197	-0.136703	-0.274939	-0.324116	0.0869933
129	115.457	401.187	21.2176	39.7742	85.9625	205.078					-0.215606	-0.350252	-0.479723	-0.664692	-0.378921	-0.209914	-0.383185	0.0701842
132	118.167	441.366	19.1927	65.4731	81.4125	224.661					-0.197197	-0.285179	-0.529375	-0.448044	-0.411795	-0.13447	-0.334343	0.0627534
135	110.907	451.489	16.8034	60.2258	118.938	231.713					-0.246518	-0.268786	-0.587964	-0.49228	-0.140677	-0.107301	-0.307254	0.0787254
138	121.124	421.718	27.0248	55.4086	94.6625	217.835					-0.177107	-0.317002	-0.337324	-0.53289	-0.316064	-0.160768	-0.306859	0.054889
141	99.5048	421.221	20.0515	51.0645	77.825	195.896					-0.323983	-0.317805	-0.508317	-0.569512	-0.437714	-0.245291	-0.400437	0.0511069
144	95.3214	366.721	18.395	61.9785	97.0875	185.035					-0.352404	-0.406072	-0.548936	-0.477504	-0.298543	-0.287133	-0.395099	0.0421819
147	97.9286	401.569	16.3187	42.3871	81.1875	195.548					-0.334691	-0.349634	-0.599849	-0.642665	-0.41342	-0.246631	-0.431148	0.0641635
150	102.326	394.626	22.3149	35.2796	104.4	252.809					-0.304815	-0.360879	-0.452816	-0.702583	-0.24571	-0.0260271	-0.348805	0.09181
153	104.769	384.305	17.6355	37.4086	175.812	191.913					-0.288218	-0.377593	-0.56756	-0.684635	0.270245	-0.260634	-0.318066	0.135458
156	86.6333	440.084	18.645	28.4301	112.688	223.261					-0.411429	-0.287256	-0.542806	-0.760326	-0.185833	-0.139863	-0.387919	0.0958703
159	96.1952	410.301	19.166	29.7312	110.425	206.722					-0.346468	-0.335491	-0.53003	-0.749358	-0.20218	-0.203582	-0.394518	0.0863169
162	77.8333	427.244	17.8969	46.0968	93.825	181.826					-0.471215	-0.308051	-0.56115	-0.611391	-0.322115	-0.299495	-0.428903	0.0563728
165	79.6429	407.546	18.1279	36.5161	118.875	206.922					-0.458921	-0.339954	-0.555485	-0.692159	-0.141128	-0.202812	-0.39841	0.0861186
168	82.2786	401.389	20.6374	19.6452	109.75	219.765					-0.441015	-0.349925	-0.49395	-0.834386	-0.207056	-0.153331	-0.413277	0.0997868
171	85.3524	350.405	15.4466	27.0538	92.325	176.844					-0.420132	-0.432498	-0.621234	-0.771929	-0.332952	-0.318691	-0.482906	0.0727102
174	89.7071	383.798	19.9046	30.0323	126.5	211.6					-0.390547	-0.378415	-0.511919	-0.746819	-0.0860377	-0.184788	-0.383088	0.0960099
177	80.4333	355.859	20.8645	30.8925	123.713	215.235					-0.453551	-0.423664	-0.488381	-0.739568	-0.106177	-0.170785	-0.397021	0.0940502
180	103.531	398.485	21.5592	21.2473	113.787	201.835					-0.29663	-0.354629	-0.471346	-0.820879	-0.177885	-0.22241	-0.39063	0.0957984
183	81.5024	363.374	23.7786	24.7419	110.05	187.426					-0.446288	-0.411493	-0.416925	-0.791419	-0.204889	-0.277921	-0.424822	0.082673
186	97.6286	384.592	21.9237	40.6344	136.925	197.939					-0.336729	-0.37713	-0.462409	-0.657441	-0.0107171	-0.237418	-0.346974	0.0886567
189	89.2095	407.523	16.979	34.9462	163.512	160.217					-0.393927	-0.339991	-0.583658	-0.705394	0.181378	-0.382745	-0.370723	0.124337
192	86.5786	384.637	27.5076	32.3979	100.75	212.244					-0.411801	-0.377056	-0.325486	-0.726877	-0.272081	-0.182309	-0.382602	0.0763769
195	86.4167	390.905	25.2386	24.9785	138.3	170.313					-0.412901	-0.366905	-0.381124	-0.789424	-0.000782708	-0.343851	-0.382498	0.1023
198	91.8071	400.519	24.8664	7.1398	123.963	189.217					-0.37628	-0.351334	-0.390251	-0.93981	-0.104371	-0.271019	-0.405511	0.11522
201	91.3071	356.931	24.4408	41.8387	122.638	205.313					-0.379677	-0.421927	-0.400687	-0.647288	-0.113944	-0.209009	-0.362089	0.0756588
204	81.7167	396.908	30.0496	24.5376	112.925	192.061					-0.444832	-0.357182	-0.263153	-0.793141	-0.184117	-0.260065	-0.383748	0.0897651
207	82.8667	372.26	23.5668	31.6989	117.513	185.513					-0.437019	-0.397102	-0.422118	-0.732769	-0.150972	-0.285291	-0.404212	0.0790928
210	82.6881	355.832	23.4084	11.3656	106.537	177.878					-0.438232	-0.423708	-0.426002	-0.904185	-0.230267	-0.314705	-0.456183	0.0955768
213	83.4238	348.863	35.0344	37.6237	124.8	191.765					-0.433234	-0.434995	-0.140921	-0.682822	-0.0983202	-0.261204	-0.341916	0.0893443
216	86.0119	355.214	27.5324	16.3979	109.312	188.035					-0.415651	-0.424709	-0.324878	-0.861761	-0.210217	-0.275576	-0.418799	0.0947102
219	86.3143	397.989	29.4065	28.8172	111.375	169.765					-0.413597	-0.355432	-0.278923	-0.757063	-0.195316	-0.345961	-0.391049	0.0793011
222	81.281	401.309	33.9828	21.8065	116.475	176.591					-0.447792	-0.350055	-0.166707	-0.816165	-0.158468	-0.319663	-0.376475	0.0989728
225	91.6762	407.466	32.979	35.7097	116.763	215.783					-0.377169	-0.340084	-0.191321	-0.698957	-0.156391	-0.168674	-0.322099	0.0843563
228	94.0952	363.248	29.2443	26.0968	136.137	188.635					-0.360735	-0.411697	-0.2829	-0.779997	-0.0164068	-0.273264	-0.354167	0.101717
231	108.341	402.763	26.1851	23.6774	132.488	180.591					-0.263955	-0.347699	-0.357915	-0.800393	-0.042778	-0.304252	-0.352832	0.10112
234	105.483	399.801	33.9065	17.5376	104.987	180.904					-0.283366	-0.352496	-0.168578	-0.852153	-0.241465	-0.303047	-0.366851	0.100299
237	89.5191	420.935	29.3702	35.5699	138.887	178.322					-0.391824	-0.318269	-0.279813	-0.700136	0.00346198	-0.312996	-0.333263	0.0921776
240	87.4214	363.958	28.0802	28.3333	154.188	177.522					-0.406075	-0.410547	-0.311445	-0.761142	0.114004	-0.316078	-0.348547	0.114568
243	81.0357	377.397	30.0267	29.5699	166.438	192.452					-0.449459	-0.388782	-0.263715	-0.750718	0.202511	-0.258557	-0.31812	0.127403
246	66.0119	378.023	36.9599	31.6021	156.475	152.687					-0.551527	-0.387768	-0.0937057	-0.733586	0.130532	-0.411757	-0.341302	0.127689
249	77.4119	417.508	28.6126	46.3118	133.262	197.826					-0.474078	-0.32382	-0.29839	-0.609579	-0.0371786	-0.237853	-0.33015	0.0804561
252	84.3071	445.496	33.8588	48.6344	138.975	173.043					-0.427233	-0.278491	-0.169748	-0.589999	0.00409417	-0.333331	-0.299118	0.0839236
255	86.5881	421.355	33.4046	40.7957	101.862	178.33					-0.411737	-0.317589	-0.180885	-0.656081	-0.264044	-0.312963	-0.357216	0.0672297
258	85.6429	411.477	33.2385	50.8817	142.188	153.53					-0.418158	-0.333587	-0.184958	-0.571053	0.0273045	-0.408507	-0.314827	0.0855135
261	87.6429	417.676	29.8855	64.2903	143.55	183.756					-0.40457	-0.323548	-0.267177	-0.458015	0.0371485	-0.292058	-0.284703	0.0706786
264	89.3833	424.996	33.2576	65.0645	139.225	170.922					-0.392746	-0.311692	-0.18449	-0.451488	0.00590042	-0.341506	-0.279337	0.0677658
267	77.8881	402.504	31.645	69.129	120.975	178.844					-0.470843	-0.34812	-0.224032	-0.417223	-0.125956	-0.310986	-0.316193	0.0515926
270	89.3643	489.733	36.0134	59.8172	153.688	181.278					-0.392876	-0.206847	-0.116915	-0.495724	0.110392	-0.301606	-0.233929	0.0878187
273	87.3286	425.424	31.9122	70.828	150.125	199.261					-0.406706	-0.311	-0.21748	-0.4029	0.0846529	-0.232326	-0.247626	0.0741586
276	83.5429	407.263	32.624	76.2258	129.65	183.235					-0.432425	-0.340411	-0.200026	-0.357395	-0.0632789	-0.294068	-0.281268	0.0536734
279	88.7619	423.817	38.1603	67.3871	155.387	139.278					-0.396968	-0.313602	-0.0642706	-0.431908	0.122674	-0.463415	-0.257915	0.09614
282	92.1024	450.244	33.3874	71.9032	130.088	198.244					-0.374273	-0.270801	-0.181307	-0.393836	-0.060118	-0.236245	-0.252764	0.0508208
285	96.5405	463.508	34.5649	78.8172	144.637	198					-0.344122	-0.24932	-0.152434	-0.335549	0.0450057	-0.237184	-0.212267	0.0589766
288	90.9595	417.122	33.5324	100.14	153.312	152.026					-0.382038	-0.324445	-0.177751	-0.155794	0.107683	-0.414303	-0.224441	0.0791799
291	94.2429	477.878	38.5477	91.1505	141.863	168.957					-0.359731	-0.226047	-0.0547712	-0.231576	0.0249563	-0.349077	-0.199374	0.0635368
294	88.5119	454.519	34.8225	75.7634	160.425	183.113					-0.398667	-0.263878	-0.146117	-0.361294	0.15907	-0.294537	-0.21757	0.0833635
297	84.7548	448.992	36.2252	95.957	163.2	169.374					-0.424192	-0.272829	-0.111721	-0.191056	0.17912	-0.347469	-0.194691	0.087321
300	98.7595	458.385	37.0057	81.8602	195.475	189.8					-0.329046	-0.257616	-0.0925826	-0.309896	0.412307	-0.268775	-0.140935	0.115802
303	90.3143	433.015	30.2424	105.484	149.925	175.504					-0.386421	-0.298704	-0.258426	-0.110742	0.0832079	-0.323851	-0.215823	0.0706918
306	89.1071	464.221	29.145	77.4516	165.387	140.035					-0.394623	-0.248164	-0.285335	-0.347062	0.194924	-0.460501	-0.256793	0.0954952
309	107.548	481.447	38.2195	76.8064	169.25	195.47					-0.269342	-0.220267	-0.062819	-0.352501	0.222831	-0.246932	-0.154838	0.0848617
312	85.3738	444.218	31.3378	66.2688	178.887	135.278					-0.419986	-0.280562	-0.231565	-0.441336	0.292462	-0.478826	-0.259969	0.117304
315	95.3333	511.118	33.1947	149.796	196.025	150.339					-0.352323	-0.172212	-0.186032	0.262819	0.41628	-0.420802	-0.0753783	0.138292
318	104.879	394.095	34.6927	135.032	156.562	202.235					-0.287474	-0.361738	-0.1493	0.13836	0.131164	-0.220869	-0.124976	0.0870253
321	89.8857	435.233	30.3912	118.172	171.938	188.904					-0.389333	-0.295113	-0.254777	-0.00377733	0.242248	-0.272226	-0.162163	0.0963687
324	84.9524	426.511	35.8588	149.946	150.412	153.974					-0.422849	-0.309238	-0.120706	0.264088	0.0867301	-0.406799	-0.151462	0.114616
327	94.0381	448.576	29.0458	118.645	173.175	147.513					-0.361123	-0.273502	-0.287767	0.000211881	0.251189	-0.43169	-0.18378	0.105645
330	92.0095	464.122	35.2786	150.032	152.938	173.904					-0.374905	-0.248325	-0.134933	0.264814	0.104973	-0.330015	-0.119732	0.103998
333	91.069	479.954	36.0611	105.462	156.963	195.93					-0.381294	-0.222684	-0.115745	-0.110923	0.134054	-0.245157	-0.156958	0.0709298
336	90.5429	500.164	31.4847	139.645	155.012	162.556					-0.384868	-0.189953	-0.227963	0.177248	0.119965	-0.373733	-0.146551	0.0987919
339	98.2238	434.824	29.2252	125.978	174.787	143.017					-0.332686	-0.295775	-0.283368	0.0620336	0.262839	-0.44901	-0.172661	0.111674
342	109.171	444.183	37.1412	142.774	159.85	180.556					-0.25831	-0.280617	-0.08926	0.203626	0.154916	-0.304387	-0.0956719	0.0924901
345	100.214	459.233	33.6889	140.538	174.588	181					-0.319163	-0.256244	-0.173914	0.184771	0.261394	-0.302678	-0.100972	0.104989
348	98.3929	504.328	34.5515	140.71	144.912	175.435					-0.331537	-0.183209	-0.152762	0.186222	0.0469926	-0.324118	-0.126402	0.0842404
351	114.617	407.977	33.9027	147.107	157.65	191.435					-0.221315	-0.339255	-0.168671	0.240157	0.139021	-0.262477	-0.10209	0.0958969
354	97.2476	488.13	32.5534	156.699	214.575	156.209					-0.339318	-0.209443	-0.201758	0.321015	0.550304	-0.398189	-0.0462314	0.158253
357	94.5619	465.908	29.7557	140.258	157.25	193.174					-0.357564	-0.245432	-0.27036	0.182415	0.136131	-0.255777	-0.135098	0.0946755
360	97.0071	450	36.4828	144.161	139.575	170.2					-0.340952	-0.271197	-0.105405	0.21532	0.00842916	-0.344286	-0.139682	0.0910689
363	84.7048	478.107	34.4218	152.893	202.963	189.078					-0.424531	-0.225676	-0.155942	0.288926	0.466404	-0.271555	-0.0537292	0.142934
366	110.252	461.492	29.5267	148.323	173.55	172.87					-0.250966	-0.252584	-0.275975	0.250401	0.253898	-0.334001	-0.101538	0.112518
369	102.579	493.317	34.3454	132.28	196.8	183.713					-0.3031	-0.201042	-0.157816	0.115154	0.42188	-0.292226	-0.0695251	0.116165
372	99.4738	437.08	31.1374	124.14	164.188	212.817					-0.324194	-0.292121	-0.236479	0.0465329	0.186254	-0.180098	-0.133351	0.0834577
375	92.8119	453.344	34	119.591	203.975	154.252					-0.369453	-0.265782	-0.166285	0.00818861	0.473719	-0.405727	-0.12089	0.13369
378	102.45	469.084	33.813	144.409	179.125	170.696					-0.303974	-0.240289	-0.170871	0.217404	0.294178	-0.342377	-0.090988	0.112648
381	98.2286	415.935	33.2443	130.763	183.075	151.852					-0.332653	-0.326367	-0.184816	0.102372	0.322717	-0.414973	-0.138953	0.118647
384	103.638	432.561	38.0363	108.613	146.8	148.043					-0.295902	-0.29944	-0.0673112	-0.0843632	0.0606298	-0.429646	-0.186006	0.0751784
387	104.431	473.469	38.124	138.441	150.512	176.348					-0.290515	-0.233186	-0.0651607	0.167095	0.0874526	-0.320601	-0.109153	0.0836439
390	108.983	457.042	38.3531	123.871	175.775	157.896					-0.259588	-0.259792	-0.059543	0.0442668	0.269974	-0.39169	-0.109395	0.0991439
393	103.6	479.164	38.9256	153.29	153.55	182.339					-0.296161	-0.223964	-0.0455047	0.29228	0.109399	-0.297519	-0.0769116	0.0983806
396	109.54	447.149	28.5134	119.473	186.675	158.304					-0.255802	-0.275814	-0.300822	0.00719131	0.348727	-0.390115	-0.144439	0.112647
399	99.5262	423.885	29.9313	139.118	132.375	187.304					-0.323838	-0.313491	-0.266054	0.172806	-0.0435908	-0.278389	-0.175426	0.0813529
402	102.986	419.859	39.2462	141.989	146.5	136.061					-0.300334	-0.320012	-0.0376433	0.197008	0.0584623	-0.475811	-0.146388	0.105526
405	111.479	477.538	36.5496	171.774	155.6	155.478					-0.242635	-0.226597	-0.103767	0.448104	0.12421	-0.401003	-0.066948	0.125316
408	113.71	428.24	33.1622	153.57	213.175	152.417					-0.227479	-0.306438	-0.186829	0.294637	0.540189	-0.412795	-0.0497859	0.154348
411	108.483	425.897	36.2615	166.172	155.838	189.643					-0.262985	-0.310233	-0.110831	0.400876	0.125926	-0.269378	-0.0711042	0.114961
414	109.262	425.221	29.4237	151.226	175.725	167.27					-0.257695	-0.311327	-0.278501	0.274875	0.269613	-0.355576	-0.109768	0.121557
417	108.283	437.309	31.5019	144.215	187.512	165.191					-0.264343	-0.29175	-0.227541	0.215773	0.354778	-0.363583	-0.0961111	0.123283
420	109.543	439.695	36.3053	163.473	142.688	154.165					-0.255786	-0.287887	-0.109757	0.378123	0.030917	-0.406062	-0.108409	0.115276
423	113.071	449.072	32.9637	165.57	153.363	136.017					-0.231814	-0.272699	-0.191697	0.3958	0.108044	-0.475978	-0.111391	0.127186
426	102.612	442.428	31.9294	130.57	191.562	166.67					-0.302874	-0.283461	-0.217059	0.10074	0.384039	-0.357887	-0.11275	0.119532
429	95.7833	423.813	29.3263	146.624	161.4	152.939					-0.349266	-0.313608	-0.280889	0.236078	0.166115	-0.410786	-0.158726	0.115491
432	106.29	477.939	34.2595	161.785	172.65	179.113					-0.277882	-0.225948	-0.159922	0.363891	0.247396	-0.309948	-0.0604021	0.118553
435	113.262	456.561	29.6546	145.893	159.525	150.322					-0.23052	-0.260571	-0.272839	0.229914	0.152568	-0.420869	-0.133719	0.106687
438	109.719	456.58	35.9294	168.022	164.363	152.487					-0.25459	-0.26054	-0.118975	0.416468	0.187519	-0.412527	-0.0737741	0.12819
441	106.267	424.023	31.5859	120.656	188.35	173.278					-0.278044	-0.313268	-0.225482	0.0171626	0.360828	-0.332427	-0.128538	0.110778
444	110.238	460.24	30.1641	149.806	139.588	152.035					-0.251063	-0.254612	-0.260346	0.26291	0.00851948	-0.414269	-0.151477	0.0997968
447	104.081	454.37	36.2195	146.107	179.613	163.861					-0.292893	-0.264119	-0.111861	0.231727	0.2977	-0.368708	-0.0846924	0.115944
450	128.424	448.679	38.4065	150.022	162.262	141.522					-0.127513	-0.273335	-0.0582336	0.264723	0.172346	-0.454772	-0.0794641	0.110011
453	109.29	434.79	34.8168	148.677	177.463	133.139					-0.257501	-0.29583	-0.146257	0.253392	0.282166	-0.487067	-0.108516	0.127229
456	106.479	442.557	34.292	153.645	147.65	154.035					-0.276604	-0.283251	-0.159125	0.295272	0.066771	-0.406564	-0.12725	0.106746
459	105.379	493.477	32.7939	121.989	148.438	132.791					-0.284077	-0.200783	-0.19586	0.0284036	0.0724607	-0.488407	-0.178044	0.0844149
462	105.564	439.191	32.3531	135.591	164.2	166.096					-0.282816	-0.288703	-0.206669	0.143073	0.186345	-0.360098	-0.134811	0.0969307
465	110.402	462.924	33.2939	125.054	152.825	156.53					-0.249947	-0.250266	-0.1836	0.0542382	0.10416	-0.39695	-0.153727	0.0792429
468	107.829	459.088	30.6966	152.871	181.05	153.096					-0.267433	-0.256478	-0.247288	0.288745	0.308086	-0.410182	-0.0974251	0.127546
471	103.262	450.645	32.5038	156.258	146.425	161.513					-0.298458	-0.270152	-0.202974	0.317299	0.0579204	-0.377754	-0.12902	0.10803
474	107.612	429.756	30.75	144.086	138.9	140.6					-0.268905	-0.303984	-0.245979	0.214685	0.00355229	-0.458323	-0.176492	0.0990769
477	113.931	445.057	34.5725	133.075	216.85	203.983					-0.225974	-0.279202	-0.152247	0.121862	0.566741	-0.214135	-0.0304925	0.13273
480	103.9	436.08	26.8263	155.957	172.125	140.496					-0.294123	-0.293741	-0.342192	0.314761	0.243603	-0.458725	-0.138403	0.134635
483	118.714	437.088	35.4656	158.172	160.95	130.365					-0.193477	-0.292109	-0.130347	0.333434	0.162864	-0.497754	-0.102898	0.124054
486	113.817	416.763	38.2538	142.957	174	154.052					-0.226751	-0.325025	-0.0619779	0.205167	0.25715	-0.406497	-0.092989	0.112912
489	114.986	447.615	38.5496	115.054	147.7	131.13					-0.218809	-0.27506	-0.0547246	-0.0300646	0.0671323	-0.494806	-0.167722	0.0832646
492	104.469	438.244	27.7653	126.871	172.338	182.287					-0.290257	-0.290236	-0.319167	0.0695577	0.245138	-0.29772	-0.147114	0.0990061
495	122.969	417.55	33.8302	133.753	98.275	156.461					-0.164572	-0.323752	-0.170449	0.127572	-0.289963	-0.397217	-0.203064	0.075648
498	106.007	428.542	37.6221	144.086	172.113	142.417					-0.279807	-0.305949	-0.0774678	0.214685	0.243513	-0.451322	-0.109391	0.11764
501	122.345	440.481	35.9962	122.699	205.5	144.217					-0.168809	-0.286613	-0.117337	0.0343857	0.484737	-0.444387	-0.0830039	0.131238
504	110.35	430.038	33.8855	125.634	123.362	166.556					-0.250303	-0.303526	-0.169093	0.0591328	-0.108706	-0.358323	-0.18847	0.0616323
507	130.052	449.683	35.75	122.064	179.088	176.696					-0.116448	-0.27171	-0.123374	0.0290375	0.293907	-0.319261	-0.0846414	0.0910631
510	109.295	463.756	32.5954	137.312	169.363	187.835					-0.257469	-0.248918	-0.200728	0.157576	0.223644	-0.276346	-0.100373	0.0929708
513	124.833	415.168	36.3989	135.237	182.15	151.009					-0.151906	-0.327609	-0.107462	0.140082	0.316033	-0.418223	-0.0915141	0.113448
516	123.857	482.412	32.6832	122.613	144.938	144.522					-0.158538	-0.218703	-0.198575	0.0336607	0.0471732	-0.443214	-0.156366	0.0742726
519	119.869	420.508	31.2824	116.301	140.713	161.817					-0.185632	-0.318961	-0.232924	-0.0195495	0.0166476	-0.376581	-0.186167	0.0645429
522	117.829	450.126	29.7767	160.796	154.625	128.4					-0.199494	-0.270993	-0.269845	0.355552	0.117165	-0.505325	-0.128823	0.126751
525	112.848	448.74	29.0821	133.839	152.738	134.626					-0.233334	-0.273237	-0.286877	0.128297	0.103528	-0.481338	-0.173827	0.0981448
528	102.302	423.553	31.9542	111.731	156.15	188.47					-0.304977	-0.314029	-0.216451	-0.0580751	0.128184	-0.2739	-0.173208	0.071483
531	121.969	477.405	37.0382	106.72	143.812	160.904					-0.171365	-0.226813	-0.0917857	-0.100317	0.0390451	-0.380099	-0.155223	0.0579465
534	128.193	416.084	31.5935	125.495	207.162	154.896					-0.129081	-0.326126	-0.225295	0.0579542	0.496749	-0.403248	-0.0881745	0.134146
537	119.598	414.699	33.6851	136.624	152.012	140.365					-0.187476	-0.32837	-0.174007	0.151776	0.0982901	-0.459228	-0.149836	0.0969768
540	112.657	464.344	31.624	144.935	182.238	156.156					-0.234629	-0.247966	-0.224547	0.221846	0.316666	-0.39839	-0.0945034	0.118544
543	118.412	447.576	29.5401	110.269	138.825	137.374					-0.195532	-0.275122	-0.275647	-0.0704035	0.00301042	-0.470752	-0.214074	0.068681
546	125.359	423.557	33.1603	137.871	179.387	166.339					-0.148331	-0.314022	-0.186876	0.162291	0.296074	-0.359161	-0.0916707	0.10772
549	120.662	448.996	31.292	109.946	184.95	173.183					-0.180246	-0.272822	-0.232688	-0.0731231	0.336263	-0.332795	-0.125902	0.0991849
552	119.217	483.202	30.6412	141.129	151.425	161.53					-0.190064	-0.217423	-0.248647	0.189757	0.0940454	-0.377687	-0.125003	0.08925
555	114.693	465.115	35.7214	124.215	170.488	156.339					-0.220798	-0.246718	-0.124075	0.0471677	0.231772	-0.397687	-0.11839	0.0921985
558	125.059	432.882	25.4198	95.871	174.438	130.583					-0.150369	-0.298921	-0.376681	-0.191781	0.260311	-0.496916	-0.20906	0.10694
561	116.302	407.935	32.437	110.602	133.238	144.017					-0.209863	-0.339323	-0.204612	-0.0675937	-0.0373593	-0.445157	-0.217318	0.0637222
564	132.26	453.286	27.1374	130.774	156.562	149.478					-0.101454	-0.265874	-0.334563	0.102463	0.131164	-0.424119	-0.148731	0.0944756
567	127.231	444.794	27.6107	117.118	153.45	142.826					-0.135617	-0.279628	-0.322958	-0.0126603	0.108676	-0.449747	-0.181989	0.084933
570	136.219	435.111	29.8931	103.387	144.887	142.096					-0.0745528	-0.295311	-0.266991	-0.128418	0.046812	-0.452561	-0.19517	0.0728002
573	117.631	427.981	32.1851	130.065	161.05	132.635					-0.200837	-0.306858	-0.210789	0.0964797	0.163586	-0.48901	-0.157905	0.100751
576	116.788	447.397	29.7004	116.323	168.45	166.861					-0.206563	-0.275413	-0.271716	-0.0193683	0.217051	-0.35715	-0.152193	0.0872575
579	121.974	408.34	35.8893	108.473	185.45	123.217					-0.171333	-0.338668	-0.119958	-0.0855417	0.339876	-0.525292	-0.150153	0.118593
582	138.269	417.538	31.1756	108.409	127.05	125.957					-0.0606262	-0.323771	-0.235543	-0.0860855	-0.0820639	-0.514739	-0.217138	0.0730733
585	135.636	454.985	32.3015	114.957	161.75	158.2					-0.0785163	-0.263124	-0.207934	-0.0308807	0.168644	-0.390517	-0.133721	0.080259
588	121.76	425.107	26.1508	117.409	161.562	156.939					-0.172789	-0.311513	-0.358756	-0.010213	0.167289	-0.395375	-0.180226	0.0903926
591	130.183	449	30.5095	96.1183	132.05	137.391					-0.115559	-0.272816	-0.251876	-0.189696	-0.0459389	-0.470685	-0.224429	0.0601815
594	130.636	398.569	32.5305	93.1398	140.387	138.939					-0.112485	-0.354493	-0.202319	-0.214806	0.0142995	-0.464722	-0.222421	0.0694592
597	124.307	460.134	33.0115	109.839	170.662	164.148					-0.155481	-0.254785	-0.190524	-0.0740294	0.233036	-0.367603	-0.134898	0.0838894
600	131.171	387.557	38.4179	142.247	152.475	125.844					-0.108846	-0.372327	-0.057954	0.199184	0.101632	-0.515174	-0.125581	0.111746
603	126.969	421.031	25.4752	90.6667	160.525	163.043					-0.137396	-0.318115	-0.375322	-0.235655	0.159793	-0.371857	-0.213092	0.083234
606	127.626	444.149	30.1088	122.505	130.713	157.104					-0.132931	-0.280673	-0.261702	0.0327544	-0.0556024	-0.394738	-0.182149	0.0647687
609	123.031	472.088	32.0019	120.462	112.662	140.113					-0.16415	-0.235424	-0.215281	0.0155314	-0.186014	-0.460199	-0.207589	0.0623915
612	136.064	441.332	31.6565	108.28	156.275	137.339					-0.0756045	-0.285235	-0.22375	-0.087173	0.129087	-0.470886	-0.168927	0.0840471
615	117.529	404.111	29.4523	110.172	172.188	155.139					-0.201533	-0.345517	-0.2778	-0.0712195	0.244054	-0.40231	-0.175721	0.0963313
618	126.955	429.931	28.376	112.516	162.438	168.574					-0.137493	-0.303699	-0.304192	-0.0514581	0.173611	-0.350551	-0.162297	0.0819151
621	128.633	392.962	29.6489	102.15	181.838	145.304					-0.126089	-0.363574	-0.272979	-0.138843	0.313776	-0.440199	-0.171318	0.109241
624	132.612	410.817	30.8989	125.968	154.387	139.522					-0.0990594	-0.334656	-0.242328	0.0619426	0.115449	-0.462478	-0.160188	0.0926678
627	134.195	420.817	29.5382	118.441	184.738	149.183					-0.0883028	-0.318461	-0.275693	-0.00151042	0.334728	-0.425258	-0.129083	0.11227
630	129.221	435.397	34.0782	108.215	152.875	146.609					-0.122094	-0.294847	-0.164368	-0.0877167	0.104522	-0.435174	-0.166613	0.0753425
633	134.945	490.58	31.7614	117.72	177.387	157.348					-0.0832074	-0.205475	-0.221178	-0.00758444	0.281624	-0.393801	-0.104937	0.0942411
636	136.652	425.767	32.3683	75.1505	120.737	164.139					-0.071609	-0.310443	-0.206296	-0.36646	-0.127672	-0.367636	-0.241686	0.0514255
639	130.117	457.924	32.9408	102.108	145.838	135.287					-0.116011	-0.258364	-0.192258	-0.139206	0.0536757	-0.478792	-0.188493	0.071995
642	134.91	484.469	25.1813	122.022	166.562	116.426					-0.08345	-0.215371	-0.382529	0.028675	0.203414	-0.551456	-0.166786	0.112409
645	131.436	431.897	34.5382	119.15	138.925	160.217					-0.10705	-0.300516	-0.153088	0.0044717	0.00373292	-0.382745	-0.155866	0.0647993
648	138.971	386.786	29.4294	101.054	156.5	140.583					-0.0558542	-0.373575	-0.278361	-0.148088	0.130712	-0.45839	-0.19726	0.0886628
651	145.193	461.653	32.7156	127.677	181.3	121.835					-0.0135865	-0.252324	-0.19778	0.0763558	0.309892	-0.530618	-0.101344	0.118991
654	129.736	452.721	28.8302	110.312	150.225	124.739					-0.1186	-0.266789	-0.293054	-0.070041	0.0853754	-0.519429	-0.19709	0.0856463
657	136.207	408.301	40.0706	94.0538	143.812	132.391					-0.0746343	-0.33873	-0.0174281	-0.2071	0.0390451	-0.489948	-0.181466	0.0831659
660	125.974	406.359	29.8721	90.6129	126.525	164.722					-0.144157	-0.341876	-0.267506	-0.236108	-0.0858571	-0.365392	-0.240149	0.044654
663	135.9	428.053	27.4084	99.1936	123.55	154.643					-0.0767207	-0.306741	-0.327918	-0.16377	-0.107351	-0.404219	-0.23112	0.0543892
666	146.198	414.233	33.7252	102.355	133	138.417					-0.00676072	-0.329124	-0.173024	-0.137121	-0.0390752	-0.466732	-0.191973	0.0719611
669	113.733	411.721	27.2653	115.398	132.6	144.939					-0.227317	-0.333191	-0.331427	-0.0271638	-0.0419652	-0.441606	-0.233778	0.0688318
672	137.012	408.779	33.126	143.925	129.387	146.252					-0.0691667	-0.337957	-0.187717	0.213325	-0.0651755	-0.436548	-0.147206	0.0939055
675	154.057	404.989	36.0916	84.4516	97.05	119.217					0.0466353	-0.344095	-0.114997	-0.28805	-0.298814	-0.540702	-0.256671	0.0822888
678	134.943	433.099	29.0687	112.194	142.537	104.678					-0.0832231	-0.298569	-0.287206	-0.0541769	0.0298332	-0.596715	-0.215009	0.0932875
681	131.186	426.027	22.9141	96.3763	138.2	135.678					-0.108749	-0.310023	-0.438123	-0.187521	-0.00150521	-0.477285	-0.253868	0.0766304
684	128.833	400.229	26.7309	107.355	152.037	108.965					-0.124731	-0.351804	-0.344531	-0.0949693	0.0984707	-0.5802	-0.232961	0.0979369
687	143.474	421.397	32.9313	87.3548	117.025	123.113					-0.0252657	-0.317521	-0.192491	-0.263575	-0.154495	-0.525694	-0.246507	0.0691885
690	116.26	383.031	37.9141	127.903	168.738	140.009					-0.210155	-0.379658	-0.0703077	0.0782594	0.219128	-0.460601	-0.137222	0.107481
693	141.407	435.821	32.6489	104.247	156.875	127.191					-0.0393058	-0.294161	-0.199416	-0.121166	0.133422	-0.509982	-0.171768	0.0900704
696	140.576	388.615	33.0725	94.3226	140.137	122.835					-0.0449515	-0.370614	-0.189029	-0.204834	0.0124932	-0.526766	-0.220617	0.0821932
699	141.238	416.553	30.4256	97.7204	146.562	115.148					-0.0404546	-0.325366	-0.253933	-0.17619	0.0589138	-0.556381	-0.215568	0.0889262
702	151.067	413.519	28.8779	84.3979	147.338	128.609					0.026319	-0.33028	-0.291885	-0.288502	0.0645132	-0.504521	-0.220726	0.0902942
705	148.879	387.431	34.7634	103.903	169.887	133.574					0.0114535	-0.372531	-0.147566	-0.124067	0.227437	-0.485392	-0.148444	0.105071
708	152.819	423.057	30.874	91.4301	134.6	122.548					0.0382238	-0.314832	-0.242938	-0.229219	-0.0275152	-0.527871	-0.217359	0.0832821
711	162.75	411.58	34.8531	85.6344	136.062	134.991					0.105693	-0.33342	-0.145367	-0.278078	-0.0169486	-0.479931	-0.191342	0.087892
714	138.029	426.546	30	79.0107	155.775	130.87					-0.0622594	-0.309182	-0.264369	-0.333918	0.125474	-0.495811	-0.223344	0.0900256
717	147.648	428.13	30.9332	60.1505	146.05	147.374					0.00309031	-0.306617	-0.241486	-0.492915	0.055211	-0.432226	-0.235824	0.0915595
720	146.619	422.008	26.5	84.3011	128.113	147.478					-0.00389781	-0.316532	-0.350193	-0.289318	-0.0743874	-0.431824	-0.244359	0.0683828
723	135.288	422.66	34.6317	88.4946	100.475	128.017					-0.0808778	-0.315475	-0.150795	-0.253966	-0.274068	-0.506799	-0.263664	0.0600421
726	156.033	408.233	39.5248	105.269	131.562	125.478					0.0600612	-0.338841	-0.0308117	-0.112555	-0.0494611	-0.516581	-0.164698	0.0891793
729	154.698	406.393	26.5859	84.8387	163.075	150.626					0.0509867	-0.341821	-0.348087	-0.284786	0.178217	-0.419697	-0.194198	0.100555
732	144.024	386.496	40.4103	79.3548	146.912	105.252					-0.0215291	-0.374045	-0.00909835	-0.331017	0.0614426	-0.594504	-0.211459	0.106294
735	148.821	397.668	33.8683	128.161	146.812	113.339					0.0110649	-0.355952	-0.169515	0.0804352	0.0607201	-0.563349	-0.156099	0.105968
738	146.245	384.332	26.7996	96.7312	166.55	130.043					-0.00643733	-0.37755	-0.342847	-0.184529	0.203323	-0.498993	-0.201172	0.106723
741	142.209	414.618	31.2595	86.4731	122.675	127.165					-0.0338551	-0.3285	-0.233485	-0.271008	-0.113673	-0.510082	-0.248434	0.0682661
744	145.357	383.122	27.1908	83.3548	136.863	130.583					-0.0124709	-0.37951	-0.333254	-0.297296	-0.0111686	-0.496916	-0.255103	0.0816931
747	157.495	453.95	33.1966	98.6774	109.763	164.061					0.0699931	-0.264799	-0.185986	-0.168122	-0.206966	-0.367938	-0.187303	0.0593273
750	154.793	399.076	26.6851	74.0538	143.575	137.339					0.0516342	-0.353671	-0.345654	-0.375706	0.0373292	-0.470886	-0.242826	0.0926863
753	151.588	429.637	33.5439	88.828	121.8	140.583					0.0298613	-0.304175	-0.177469	-0.251155	-0.119995	-0.45839	-0.213554	0.0680385
756	155.298	390.668	42.1031	95.1075	137.825	148.313					0.055063	-0.367289	0.0324108	-0.198217	-0.00421458	-0.428608	-0.151809	0.0863559
759	159.281	377.634	30.0553	97.9355	168.037	132.052					0.0821248	-0.388399	-0.263013	-0.174377	0.214071	-0.491255	-0.170141	0.111153
762	161.998	400.393	26.7939	81.9462	139.162	137.974					0.100582	-0.351538	-0.342986	-0.309171	0.00544885	-0.468441	-0.227684	0.0922582
765	136.136	374.515	22.5363	75.043	96.85	150.156					-0.0751194	-0.393449	-0.447387	-0.367367	-0.300259	-0.421506	-0.334181	0.055773
768	157.643	361.523	32.3111	106.645	126.975	134.009					0.0709965	-0.414491	-0.207699	-0.100951	-0.0826058	-0.483717	-0.203078	0.0863202
771	163.895	391.122	26.1355	85.4409	125.037	135.209					0.113473	-0.366553	-0.359131	-0.27971	-0.0966043	-0.479094	-0.244603	0.0883797
774	176.474	361.847	25.3492	63.5914	117.088	107.861					0.19893	-0.413966	-0.378412	-0.463907	-0.154043	-0.584454	-0.299309	0.115058
777	181.776	380.023	31.2252	93.5914	141.562	137.687					0.234954	-0.384529	-0.234326	-0.210999	0.0227888	-0.469546	-0.17361	0.106872
780	156.948	359.038	27.0916	81.9893	173.387	130.035					0.0662728	-0.418515	-0.335686	-0.308808	0.252724	-0.499027	-0.207173	0.121514

## Sheet: D
	TK-GC6m 50mM glucose009.nd2	TK-GC6m50mM glucose010.nd2	TK-GC6m 50mM glucose011.nd2	TK-GC6m 50mM glucose012.nd2	TK-GC6m 50mM glucose013.nd2	TK-GC6m 50mM glucose014.nd2					TK-GC6m 50mM glucose009.nd2	TK-GC6m50mM glucose010.nd2	TK-GC6m 50mM glucose011.nd2	TK-GC6m 50mM glucose012.nd2	TK-GC6m 50mM glucose013.nd2	TK-GC6m 50mM glucose014.nd2
time（sec）	raw data	raw data	raw data	raw data	raw data	raw data					F/F0	F/F0	F/F0	F/F0	F/F0	F/F0	mean	SEM
0	325.248	89.7692	92.3613	120.507	170.499	53.8478					0.081312	0.0987977	0.214309	-0.101803	0.0638679	-0.0699808	0.0477503	0.0475957
3	293.81	93.8107	85.5588	145.088	164.635	63.811					-0.0232038	0.148267	0.124874	0.081414	0.0272787	0.102096	0.0767875	0.0261616
6	310.634	87.2367	72.3613	127.774	195.965	54.3161					0.0327263	0.0677992	-0.048639	-0.0476388	0.222769	-0.0618927	0.0275207	0.044428
9	309.81	83.7929	77.5924	130.244	134.859	49.2258					0.0299895	0.0256462	0.0201363	-0.0292249	-0.158515	-0.149809	-0.0436295	0.0360394
12	277.109	81.6331	68.6092	136.421	155.237	52.1438					-0.0787277	-0.000790254	-0.0979692	0.0168116	-0.0313624	-0.0994111	-0.0485748	0.0206465
15	313.18	96.6982	75.458	127.428	154.723	57.9448					0.0411926	0.18361	-0.00792549	-0.0502192	-0.034569	0.000779509	0.0221448	0.03476
18	312.608	83.5207	62.9202	122.805	154.602	61.1154					0.0392896	0.0223144	-0.172765	-0.0846707	-0.0353234	0.0555398	-0.0292691	0.0357075
21	302.813	67.2012	90.0084	149.652	138.622	62.1823					0.00672803	-0.17744	0.183374	0.115427	-0.135033	0.0739665	0.0111704	0.0581481
24	303.711	97.7101	92.1975	129.131	151.851	56.6237					0.00971052	0.195996	0.212155	-0.0375214	-0.0524865	-0.0220375	0.0509694	0.0491866
27	311.093	83.9053	67.1555	122.742	169.547	61.3662					0.0342549	0.027022	-0.117082	-0.0851425	0.057927	0.0598714	-0.00385812	0.0314705
30	302.711	70.1124	84.5126	137.921	165.227	58.2676					0.00638593	-0.141807	0.111119	0.0279918	0.030972	0.00635467	0.0068361	0.033665
33	285.842	85.432	74.2311	141.683	158.776	58.5468					-0.0496938	0.0457092	-0.024056	0.0560356	-0.00927998	0.0111768	0.00498199	0.0166729
36	280.939	83.4911	63.0924	138.95	173.073	63.3027					-0.0659958	0.0219521	-0.170501	0.0356645	0.0799309	0.0933172	-0.000938643	0.0409355
39	298.556	91.7574	72.521	135.034	167.176	55.9415					-0.00742537	0.123134	-0.0465393	0.00647435	0.043137	-0.03382	0.0141601	0.0253156
42	296.235	84.0118	75.7101	138.665	181.227	62.7492					-0.0151437	0.0283256	-0.00461103	0.0335402	0.130808	0.0837575	0.0427794	0.0226005
45	287.669	94.3195	77.2857	147.946	150.237	54.3612					-0.0436217	0.154494	0.016104	0.102712	-0.0625611	-0.0611138	0.017669	0.0375749
48	290.235	64.6864	63.7815	134.4	157.149	61.5853					-0.0350912	-0.208222	-0.161441	0.00175331	-0.0194333	0.0636555	-0.0597964	0.0422808
51	297.54	80.0828	75.6261	126.337	149.962	62.7642					-0.0108035	-0.0197663	-0.00571541	-0.0583472	-0.0642746	0.0840166	-0.0124817	0.021756
54	327.617	66.2012	82.2353	130.633	154.831	46.9197					0.0891906	-0.189681	0.0811782	-0.026324	-0.0338933	-0.189638	-0.0448611	0.0504158
57	284.17	66.2249	59.584	140.731	159.413	55.0903					-0.0552525	-0.189391	-0.216627	0.0489362	-0.00530339	-0.0485213	-0.0776931	0.0425867
60	305.055	64.0533	84.4748	133.378	157.914	63.7876					0.0141791	-0.215971	0.110622	-0.00586938	-0.0146549	0.101692	-0.00166715	0.0481856
63	320.067	71.8817	72.9118	135.262	168.922	57.3997					0.0640904	-0.12015	-0.0414013	0.00817748	0.0540291	-0.00863505	-0.00731489	0.027687
66	267.608	75.3432	71.605	139.17	164.809	64.7308					-0.110317	-0.0777802	-0.0585823	0.0373005	0.0283631	0.117982	-0.0105055	0.0351685
69	203.132	59.8757	78.4706	123.029	173.358	60.1003					-0.324672	-0.267106	0.0316823	-0.0830011	0.0817073	0.0380077	-0.0872303	0.0700277
72	258.826	65.929	80.521	121.373	156.887	66.408					-0.139511	-0.193012	0.0586397	-0.0953448	-0.0210681	0.14695	-0.0405578	0.0520944
75	241.019	65.0651	59.8319	138.507	166.592	62.3595					-0.198712	-0.203587	-0.213368	0.0323596	0.0394905	0.0770269	-0.0777982	0.0573539
78	181.91	72.0414	52.1092	136.704	146.141	54.2592					-0.395225	-0.118195	-0.314901	0.0189195	-0.0881172	-0.0628754	-0.160066	0.0652394
81	139.743	84.432	67.3403	154.78	152.962	55.7977					-0.535414	0.033469	-0.114652	0.153656	-0.0455553	-0.0363036	-0.0908	0.0963446
84	171.955	78.6509	56.2269	145.084	165.844	61.995					-0.428322	-0.0372931	-0.260764	0.0813805	0.0348225	0.0707316	-0.0899074	0.0850855
87	232.354	78.7101	54.2563	121.805	175.269	59.6957					-0.227521	-0.0365685	-0.286672	-0.0921242	0.0936364	0.0310198	-0.0863717	0.0602054
90	264.878	68.5562	63.3613	121.21	145.841	55.0786					-0.119392	-0.160855	-0.166965	-0.096559	-0.0899879	-0.0487234	-0.113747	0.018413
93	205.981	69.2071	47.4076	124.796	147.597	55.4716					-0.3152	-0.152888	-0.376715	-0.0698308	-0.0790328	-0.0419358	-0.1726	0.0573805
96	179.408	76.3077	56.1723	119.283	150.751	61.9214					-0.403542	-0.0659745	-0.261482	-0.110926	-0.0593552	0.0694604	-0.138637	0.0685331
99	246.92	66.8225	49.5126	126.719	169.458	51.6589					-0.179096	-0.182076	-0.349039	-0.055497	0.0573767	-0.107786	-0.13602	0.0559873
102	178.183	56.7337	45.8445	113.968	153.723	60.1288					-0.407615	-0.305565	-0.397265	-0.150538	-0.0408088	0.0384999	-0.210549	0.0768472
105	256.434	71.1953	65.6723	124.563	167.723	44.8796					-0.147464	-0.128552	-0.136582	-0.0715682	0.0465476	-0.224873	-0.110415	0.0372528
108	256.36	64.4675	55.0252	142.242	157.025	50.204					-0.14771	-0.210902	-0.276563	0.0602006	-0.0202033	-0.132914	-0.121349	0.0503754
111	183.82	73.3669	60.8025	127.695	156.723	49.592					-0.388876	-0.101971	-0.200607	-0.0482291	-0.0220895	-0.143484	-0.150876	0.0543709
114	210.077	52.5917	51.7857	117.894	162.191	54.0502					-0.301581	-0.356264	-0.319154	-0.12128	0.0120325	-0.0664851	-0.192122	0.0625948
117	205.752	69.2544	49.1303	131.38	185.829	61.7759					-0.315959	-0.152309	-0.354066	-0.0207592	0.159523	0.0669474	-0.10277	0.0847311
120	267.566	70.645	41.4832	129.548	175.894	54.3344					-0.110455	-0.135287	-0.454605	-0.0344185	0.0975344	-0.0615766	-0.116468	0.0753368
123	257.373	76.0651	50.0252	132.812	162.121	54.8528					-0.144343	-0.068944	-0.3423	-0.0100851	0.0115926	-0.0526232	-0.101117	0.0530455
126	239.563	65.3964	53.8277	117.876	169.023	50.1789					-0.203554	-0.199532	-0.292307	-0.121415	0.054658	-0.133347	-0.14925	0.0478012
129	264.28	62.0355	51.7395	122.654	159.761	53.5836					-0.12138	-0.24067	-0.319761	-0.0858006	-0.00313446	-0.0745439	-0.140882	0.0478696
132	221.325	68.1893	53.5336	123.918	167.214	59.8729					-0.264188	-0.165346	-0.296174	-0.0763742	0.0433728	0.0340802	-0.120771	0.059502
135	201.428	70.2367	50.2521	125.98	172.196	53.1421					-0.330337	-0.140285	-0.339317	-0.0610118	0.0744617	-0.0821692	-0.146443	0.0661523
138	193.981	81.0769	61.6975	131.572	174.635	50.097					-0.355095	-0.00759828	-0.18884	-0.0193259	0.0896761	-0.134762	-0.102658	0.0645899
141	231.087	77.0473	74.3025	121.76	134.731	46.1689					-0.231733	-0.0569216	-0.0231173	-0.0924611	-0.159316	-0.202605	-0.127692	0.0339716
144	195.299	58.9112	61.7563	125.708	163.579	47.0067					-0.350713	-0.278912	-0.188067	-0.0630354	0.0206926	-0.188135	-0.174695	0.0556318
147	143.434	76.716	60.7479	122.814	165.71	50.6171					-0.523142	-0.0609768	-0.201325	-0.0846029	0.0339895	-0.125779	-0.160306	0.0791354
150	105.849	77.3669	58.3529	127.152	147.809	49.9615					-0.648097	-0.0530096	-0.232813	-0.0522763	-0.0777125	-0.137102	-0.200168	0.0938449
153	154.129	80.858	52.1008	128.706	155.058	60.8645					-0.487587	-0.0102777	-0.315011	-0.0406914	-0.0324787	0.0512064	-0.13914	0.0868432
156	157.701	71.0651	78.5378	135.428	140.806	49.4749					-0.47571	-0.130145	0.0325658	0.00940879	-0.121407	-0.145506	-0.138466	0.0742209
159	196.151	57.7633	73.8866	129.853	155.718	40.5017					-0.34788	-0.292963	-0.0285853	-0.0321422	-0.0283605	-0.300485	-0.171736	0.063988
162	160.261	52.5444	72.2563	130.495	175.617	39.8679					-0.467201	-0.356843	-0.0500194	-0.0273526	0.0958054	-0.311431	-0.186174	0.0907502
165	182.576	61.6864	59.9538	127.348	164.758	45.3729					-0.393013	-0.244943	-0.211765	-0.0508095	0.0280487	-0.216353	-0.181472	0.0610693
168	143.119	69.8698	53.8277	127.518	173.317	47.2659					-0.524189	-0.144776	-0.292307	-0.0495446	0.0814558	-0.183659	-0.185503	0.0851527
171	154.379	57.3669	78.6849	135.136	148.693	44.5702					-0.486753	-0.297815	0.0344998	0.00723312	-0.0721959	-0.230217	-0.174208	0.082257
174	134.463	71.6864	76.4538	128.966	159.526	47.806					-0.552967	-0.12254	0.00516667	-0.038752	-0.00459643	-0.17433	-0.148003	0.0858874
177	159.087	76.0947	75.3529	136.837	175.239	49.7525					-0.471103	-0.0685817	-0.00930728	0.0199145	0.093448	-0.140712	-0.0960569	0.08171
180	124.961	78.2722	66.063	127.5	183.055	49.1973					-0.584556	-0.0419285	-0.131445	-0.0496795	0.142218	-0.150301	-0.135949	0.0991856
183	154.386	62.2604	68.0462	125.466	191.839	47.888					-0.486732	-0.237917	-0.105371	-0.0648392	0.197025	-0.172914	-0.145125	0.0915005
186	113.746	66.9941	65.1807	137.683	171.738	46.1739					-0.621842	-0.179975	-0.143045	0.0262216	0.0716008	-0.202519	-0.174926	0.100461
189	117.955	63.0651	63.1513	126.253	176.856	45.5017					-0.607849	-0.228067	-0.169726	-0.0589711	0.103538	-0.214128	-0.195867	0.096638
192	107.209	65.5089	65.2521	120.462	193.924	51.4565					-0.643575	-0.198155	-0.142106	-0.102141	0.210038	-0.111282	-0.164537	0.112271
195	112.132	87.0059	58.437	125.032	184.94	45.0435					-0.627209	0.0649742	-0.231707	-0.068077	0.153975	-0.222042	-0.155014	0.11325
198	109.476	77.2012	57.105	126.638	189.196	48.3997					-0.636038	-0.0550378	-0.249219	-0.0561044	0.180537	-0.164076	-0.163323	0.1114
201	102.26	69.8639	53.2899	124.247	186.345	39.6321					-0.660027	-0.144848	-0.299378	-0.0739287	0.162745	-0.315504	-0.221823	0.112916
204	93.3891	71.8166	64.6471	127.201	204.72	44.3278					-0.68952	-0.120947	-0.15006	-0.0519051	0.277402	-0.234403	-0.161572	0.127873
207	113.122	77.2071	53.7185	134.283	173.531	45.8729					-0.623916	-0.0549656	-0.293743	0.000876034	0.0827918	-0.207717	-0.182779	0.104583
210	86.0611	77.8876	81.4664	122.767	208.315	47.7575					-0.713883	-0.0466361	0.0710692	-0.0849569	0.299831	-0.175168	-0.108291	0.138359
213	93.5949	70.1598	68.6555	131.738	194.234	45.1538					-0.688836	-0.141226	-0.0973605	-0.0180946	0.211972	-0.220137	-0.158947	0.121936
216	92.9132	62.7574	69.4202	134.697	142.063	43.6622					-0.691103	-0.231834	-0.0873067	0.00396178	-0.113564	-0.245899	-0.227624	0.100249
219	80.7106	83.6272	64.6597	118.889	172.363	46.3863					-0.731671	0.023618	-0.149895	-0.113861	0.0754988	-0.19885	-0.182527	0.117853
222	83.3923	79.9586	72.5714	137.821	164.116	48.0301					-0.722756	-0.0212866	-0.0458767	0.0272502	0.0240409	-0.17046	-0.151515	0.117979
225	106.698	66.8817	54.4958	144.722	174.516	47.0284					-0.645275	-0.181351	-0.283523	0.0786823	0.0889373	-0.18776	-0.188382	0.110466
228	91.881	95.1361	66.9748	125.443	179.887	36.1806					-0.694534	0.16449	-0.119457	-0.0650084	0.122446	-0.375116	-0.161197	0.132631
231	102.855	83.6036	70.7899	134.305	181.433	45.5535					-0.658049	0.0233292	-0.0692987	0.00104448	0.132096	-0.213234	-0.130685	0.1153
234	92.1415	101.953	79.1218	134.043	184.723	41.01					-0.693668	0.247927	0.0402439	-0.000911314	0.152623	-0.291706	-0.0909152	0.141781
237	97.9068	78.0414	66.0378	126.12	208.486	44.5585					-0.674501	-0.0447536	-0.131776	-0.0599661	0.300899	-0.230419	-0.140086	0.12959
240	100.447	65.568	75.7311	121.864	173.99	42.8863					-0.666056	-0.197431	-0.00433494	-0.0916852	0.0856521	-0.2593	-0.188859	0.108259
243	104.424	84.0947	71.3613	126.054	187.138	46.2341					-0.652833	0.0293404	-0.0617863	-0.060455	0.167696	-0.201479	-0.129919	0.115753
246	105.949	96.8107	73.4538	118.882	206.443	50.9783					-0.647765	0.184987	-0.0342755	-0.113911	0.288153	-0.119541	-0.0737253	0.133252
249	86.2315	83.3728	64.5966	111.582	177.788	43.8779					-0.713316	0.0205041	-0.150724	-0.168328	0.109354	-0.242174	-0.190781	0.117263
252	94.5852	71.0296	61.7017	127.412	195.977	49.9314					-0.685544	-0.13058	-0.188785	-0.0503369	0.222848	-0.137622	-0.16167	0.120689
255	77.254	92.6686	69.9622	129.604	179.008	41.4381					-0.743163	0.134287	-0.0801808	-0.0339966	0.116961	-0.284312	-0.148401	0.1342
258	90.3601	68.8402	69.5084	121.063	190.446	43.4866					-0.699591	-0.157379	-0.0861471	-0.0976554	0.188333	-0.248932	-0.183562	0.119222
261	91.6656	83.4083	77.3866	132.525	202.809	42.6154					-0.69525	0.0209386	0.0174305	-0.0122265	0.265473	-0.263978	-0.111269	0.135418
264	93.0836	85.7811	66.8529	123.839	184.945	41.3813					-0.690536	0.0499823	-0.12106	-0.0769638	0.154007	-0.285293	-0.161644	0.122237
267	99.328	78.8994	48.0798	126.403	192.264	47.1505					-0.669776	-0.0342514	-0.367877	-0.0578582	0.199681	-0.185652	-0.185956	0.123196
270	103.543	95.6982	53.3571	119.265	199.494	43.3512					-0.655762	0.17137	-0.298494	-0.111061	0.244789	-0.25127	-0.150071	0.135247
273	113.958	89.8462	44.416	122.486	193.385	48.5067					-0.621137	0.0997402	-0.416046	-0.0870484	0.206675	-0.162228	-0.163341	0.127198
276	106.54	79.9586	45.4622	123.814	206.166	40.1823					-0.645798	-0.0212866	-0.402291	-0.0771494	0.286424	-0.306001	-0.194351	0.133459
279	117.637	119.823	47.0546	116.69	190.579	41.6639					-0.608907	0.466658	-0.381356	-0.130252	0.189166	-0.280412	-0.124184	0.160501
282	92.3762	85.2308	48.4664	123.649	200.413	47.6338					-0.692888	0.0432465	-0.362794	-0.0783807	0.250526	-0.177304	-0.169599	0.134331
285	111.051	83.8994	52.5798	116.536	196.186	50.5569					-0.630801	0.0269498	-0.308714	-0.131398	0.224153	-0.126819	-0.157771	0.119468
288	92.7203	91.2012	84.5168	134.468	210	40.7559					-0.691744	0.116326	0.111174	0.00225866	0.310346	-0.296094	-0.0746224	0.147759
291	109.035	90.1538	63.8782	123.486	225.746	38.9565					-0.637503	0.103505	-0.160169	-0.0795949	0.408594	-0.327172	-0.11539	0.146426
294	111.051	102.811	58.6933	119.213	185.511	49.2575					-0.630801	0.258429	-0.228337	-0.111449	0.157543	-0.149261	-0.117313	0.128294
297	102.682	62.1657	56.7731	129.59	176.804	50.4298					-0.658626	-0.239076	-0.253583	-0.034098	0.103208	-0.129014	-0.201865	0.106335
300	106.119	93.1775	48.7479	127.133	158.509	43.9281					-0.647199	0.140516	-0.359093	-0.0524112	-0.010946	-0.241307	-0.195073	0.115518
303	117.952	82.1124	75.9328	127.821	190.605	43.1371					-0.60786	0.0050765	-0.00168311	-0.0472847	0.189323	-0.254968	-0.119566	0.113554
306	95.9871	78.142	55.1639	140.751	190.871	48.388					-0.680883	-0.0435222	-0.27474	0.0490875	0.190989	-0.164278	-0.153891	0.124466
309	106.576	98.6568	73.7353	136.396	180.065	42.9565					-0.645681	0.207584	-0.0305745	0.016626	0.123562	-0.258087	-0.0977617	0.127245
312	98.3923	95.4793	52.8445	126.869	151.35	43.5936					-0.672887	0.168691	-0.305234	-0.0543842	-0.0556144	-0.247084	-0.194419	0.117574
315	110.421	105.598	57.5	123.774	183.169	42.1538					-0.632896	0.292541	-0.244026	-0.0774527	0.142926	-0.271951	-0.13181	0.134391
318	101.447	66.7456	66.5966	120.543	200.234	43.806					-0.662732	-0.183017	-0.12443	-0.101533	0.24941	-0.243415	-0.177619	0.119814
321	98.2894	86.5621	51.1303	131.738	180.232	40.5719					-0.673229	0.0595419	-0.327771	-0.0180946	0.124599	-0.299272	-0.189038	0.123183
324	133.071	78.568	60.9034	142.9	201.69	42.1923					-0.557596	-0.0383079	-0.19928	0.065108	0.258495	-0.271286	-0.123811	0.116157
327	113.933	110.562	63.8866	143.885	186.151	37.0217					-0.621222	0.353308	-0.160059	0.072443	0.161535	-0.360589	-0.0924307	0.146795
330	111.875	107.148	64.4538	116.722	194.547	43.1689					-0.628064	0.311517	-0.152602	-0.130016	0.213921	-0.254419	-0.10661	0.138323
333	117.476	106.296	53.542	119.679	183.592	41.7224					-0.609442	0.301089	-0.296063	-0.107976	0.145566	-0.279402	-0.141038	0.134324
336	105.158	82.7337	51.0336	127.918	210.199	40.6555					-0.650395	0.0126814	-0.329042	-0.0465602	0.311588	-0.297828	-0.166593	0.135755
339	122.669	91.2249	56.9286	110.989	204.657	45.413					-0.592178	0.116616	-0.251538	-0.172746	0.277009	-0.21566	-0.13975	0.124291
342	102.627	96.7041	63.0336	125.645	202.612	43.796					-0.658808	0.183683	-0.171274	-0.0635072	0.264247	-0.243588	-0.114875	0.135538
345	120.441	96.4556	65.4958	137.699	218.673	43.1405					-0.599586	0.180641	-0.138902	0.0263394	0.36446	-0.254909	-0.0703262	0.139075
348	108.868	102.834	62.2521	129.557	207.025	48.1572					-0.638059	0.258718	-0.181548	-0.0343507	0.291784	-0.168265	-0.0786202	0.13959
351	99.4566	110.379	62.3487	132	217.914	43.8278					-0.669348	0.351063	-0.180278	-0.0161388	0.35973	-0.243039	-0.0663353	0.159802
354	108.534	102.095	57.5126	132.624	222.423	39.704					-0.639171	0.249665	-0.24386	-0.0114848	0.387863	-0.314262	-0.0952083	0.155487
357	106.502	107.84	58.2899	131.95	199.894	39.9799					-0.645927	0.319991	-0.233641	-0.01651	0.247288	-0.309497	-0.106383	0.148718
360	112.695	91.8462	52.7395	127.124	182.935	34.3445					-0.625338	0.124221	-0.306614	-0.0524791	0.141464	-0.406827	-0.187596	0.126176
363	106.65	83.5858	48.9244	139.738	209.96	34.9214					-0.645435	0.0231113	-0.356773	0.0415334	0.310094	-0.396864	-0.170722	0.144328
366	108.19	94.3728	63.0546	125.957	190.796	39.9833					-0.640315	0.155147	-0.170998	-0.0611803	0.190518	-0.309438	-0.139378	0.126826
369	113.37	81.4911	57.2101	140.557	217.05	45.413					-0.623093	-0.00252837	-0.247837	0.0476378	0.354338	-0.21566	-0.114524	0.134823
372	123.058	114.16	67.2227	127.688	218.048	41.5251					-0.590884	0.397345	-0.116198	-0.0482798	0.360563	-0.282809	-0.0467106	0.154893
375	109.746	105.166	52.9832	112.805	200.995	50.7592					-0.635141	0.287255	-0.30341	-0.159206	0.254157	-0.123325	-0.113278	0.142143
378	111.83	88.1065	73.1345	134.697	206.602	42.1605					-0.628213	0.0784458	-0.0384734	0.00396178	0.289143	-0.271835	-0.0944952	0.1299
381	118.476	81.1598	66.9832	123.858	195.632	36.8796					-0.606117	-0.00658357	-0.119347	-0.0768289	0.220694	-0.363043	-0.158538	0.117936
384	137.045	99.5148	58.563	128.81	214.945	40.6756					-0.544383	0.218086	-0.23005	-0.0399154	0.341199	-0.297481	-0.0920908	0.135703
387	122.145	103.846	52.6975	132.656	210.589	43.3043					-0.59392	0.271104	-0.307166	-0.0112486	0.314024	-0.25208	-0.096548	0.144562
390	107.958	93.3669	68.1765	124.538	220.657	48.0836					-0.641084	0.142834	-0.103658	-0.071753	0.376845	-0.169536	-0.0777252	0.139259
393	125.276	93.355	47.895	126.21	213.305	43.6656					-0.583508	0.142689	-0.370307	-0.0592916	0.330967	-0.24584	-0.130882	0.137681
396	121.418	95.9112	67.7059	126.079	212.146	44.1237					-0.596336	0.173977	-0.109845	-0.0602694	0.323737	-0.237928	-0.0844441	0.131683
399	128.553	119.787	64.1597	137.369	225.758	46.8161					-0.572615	0.466223	-0.156468	0.0238775	0.408673	-0.191427	-0.00362281	0.160612
402	113.174	117.367	63.3025	124.396	222.232	41.2876					-0.623745	0.4366	-0.167738	-0.0728159	0.386668	-0.286911	-0.054657	0.166034
405	110.797	97.2781	66.8655	132.916	205.965	39.6254					-0.631645	0.190708	-0.120894	-0.00930917	0.285167	-0.31562	-0.100265	0.137921
408	130.331	118.237	59.6513	131.228	206.851	42.3378					-0.566703	0.447247	-0.215742	-0.0218892	0.290699	-0.268773	-0.0558602	0.153431
411	121.801	75.8107	66.3571	134.529	222.511	37.7207					-0.595064	-0.0720579	-0.127578	0.00271407	0.388413	-0.348516	-0.125348	0.135847
414	145.248	113.793	67.6134	126.249	215.685	38.6288					-0.517113	0.392854	-0.111061	-0.0590046	0.345819	-0.332832	-0.0468896	0.147731
417	128.289	123.095	70.4286	145.57	217.756	47.1639					-0.573491	0.50671	-0.0740489	0.0850059	0.358739	-0.18542	0.0195825	0.159073
420	133.244	92.5266	58.1345	138.934	204.433	49.1806					-0.557018	0.132549	-0.235684	0.0355467	0.27561	-0.150589	-0.0832642	0.121338
423	132.299	91.0414	63.7017	128.357	196.322	43.9666					-0.560161	0.11437	-0.16249	-0.0432882	0.225001	-0.240642	-0.111202	0.113941
426	128.913	85.5858	60.8109	140.448	221.033	41.0953					-0.571418	0.0475918	-0.200496	0.0468283	0.379187	-0.290233	-0.0980899	0.134346
429	141.376	103.663	80.8698	146.188	211.806	40.286					-0.529983	0.268858	0.0632255	0.0896099	0.321615	-0.30421	-0.0151476	0.136601
432	135.871	121.408	69.1891	134.76	210.501	47.8913					-0.548285	0.486068	-0.0903451	0.00443433	0.313474	-0.172857	-0.00125171	0.149799
435	148.113	90.8521	81.6891	131.188	209.72	40.0886					-0.507588	0.112053	0.0739971	-0.0221925	0.308601	-0.30762	-0.0571248	0.121991
438	136.264	107.219	58.6008	136.201	221.101	46.1538					-0.54698	0.312386	-0.229553	0.0151763	0.379612	-0.202866	-0.0453708	0.144061
441	144.727	93.7456	85.6849	134.559	206.453	43.796					-0.518844	0.14747	0.126531	0.0029332	0.288216	-0.243588	-0.0328803	0.121502
444	122.186	90.7041	86.042	128.22	208.343	41.388					-0.593781	0.110241	0.131226	-0.0443167	0.300004	-0.285177	-0.0636339	0.133035
447	140.907	101.728	91.7185	131.421	194.627	48.1137					-0.531544	0.245174	0.205857	-0.0204559	0.214424	-0.169016	-0.00926015	0.123757
450	152.1	121.87	95.5	129.923	217.723	43.9766					-0.494332	0.491717	0.255574	-0.031619	0.358535	-0.240469	0.0565677	0.154881
453	137.63	112.799	89.8698	123.882	208.511	43.9649					-0.542437	0.380686	0.181552	-0.0766433	0.301057	-0.240671	0.000590476	0.144517
456	154.412	85.3195	93.6134	144.966	219.098	38.1388					-0.486646	0.0443322	0.23077	0.0805039	0.367116	-0.341295	-0.0175364	0.135146
459	133.019	90.213	106.861	131.548	218.569	39.0217					-0.557767	0.10423	0.404945	-0.0195115	0.363816	-0.326046	-0.00505549	0.15544
462	141.199	96.9822	113.294	138.052	214.146	44.403					-0.530571	0.187087	0.48952	0.0289697	0.336216	-0.233104	0.0463528	0.153998
465	156.347	93.8462	110.912	130.826	201.005	39.8278					-0.480211	0.148701	0.458199	-0.0248907	0.254219	-0.312124	0.00731568	0.144338
468	139.955	98.7396	94.4496	140.921	227.383	35.7408					-0.534708	0.208598	0.241764	0.0503523	0.418811	-0.382711	0.000350835	0.154087
471	152.013	106.538	121.592	121.041	230.335	44.0468					-0.494621	0.304058	0.598621	-0.0978239	0.437231	-0.239256	0.0847015	0.174202
474	148.142	97.7574	112.156	137.74	222.161	39.0535					-0.507492	0.196575	0.47455	0.0266428	0.386229	-0.325497	0.0418347	0.159866
477	133.238	97.6331	121.471	132.138	210.952	38.4783					-0.55704	0.195054	0.597019	-0.0151102	0.316287	-0.335431	0.0334631	0.174244
480	148.344	105.154	122.685	138.921	203.149	37.0652					-0.506818	0.287109	0.612984	0.0354453	0.267595	-0.359837	0.0560797	0.173063
483	139.971	90.0651	131.677	146.315	204.746	40.704					-0.534655	0.10242	0.7312	0.0905542	0.27756	-0.296991	0.0616814	0.180888
486	154.855	72.6568	125.689	142.199	216.269	43.7559					-0.485171	-0.110662	0.652482	0.0598801	0.349466	-0.244281	0.0369522	0.168381
489	157.158	87.5858	129.445	149.233	189.491	44.898					-0.477517	0.0720723	0.701867	0.112307	0.182376	-0.224555	0.0610918	0.163273
492	156.881	92.5385	114.622	141.613	201.605	44.7809					-0.478436	0.132695	0.506976	0.0555124	0.25796	-0.226578	0.0413548	0.143089
495	130.707	88.9231	101.29	138.665	226.461	40.0669					-0.565453	0.0884412	0.331696	0.0335402	0.413058	-0.307994	-0.00111853	0.153207
498	113.331	95.5207	97.895	122.328	188.312	44.8294					-0.623221	0.169197	0.287062	-0.0882282	0.17502	-0.22574	-0.0509849	0.138229
501	148.955	69.9704	79.7479	151.808	207.033	43.4799					-0.504787	-0.143545	0.0484754	0.131498	0.291831	-0.249047	-0.0709292	0.117198
504	141.736	98.7337	85.2479	148.977	250.635	36.9783					-0.528786	0.208525	0.120786	0.110402	0.563896	-0.361338	0.0189143	0.162919
507	128.579	77.2189	83.3866	148.726	229.36	36.6739					-0.572529	-0.0548212	0.0963148	0.10853	0.431148	-0.366596	-0.0596589	0.147284
510	147.521	87.0473	94.105	141.011	205.516	45.0502					-0.509555	0.0654809	0.237234	0.0510269	0.282369	-0.221926	-0.0158951	0.122513
513	128.19	78.4911	92.5462	129.778	196.882	43.9465					-0.573823	-0.0392491	0.216739	-0.0326982	0.22849	-0.240989	-0.0735882	0.123376
516	130.875	95.4083	101.844	136.731	191.602	37.0535					-0.564897	0.167822	0.338988	0.0191222	0.195547	-0.360039	-0.0339096	0.144166
519	123.981	85.5858	94.6134	127.312	190.652	38.8411					-0.587816	0.0475918	0.243918	-0.0510793	0.189622	-0.329165	-0.0811549	0.130982
522	126.994	92.213	78.0924	126.464	150.416	43.1739					-0.577799	0.12871	0.02671	-0.0574028	-0.0614455	-0.254332	-0.132593	0.102859
525	130.064	118.243	70.9496	132.986	199.048	44.5485					-0.567591	0.447319	-0.0671991	-0.00878668	0.242008	-0.230591	-0.0308069	0.145246
528	127.373	84.0533	89.1765	126.038	200.763	37.4482					-0.576538	0.0288336	0.172437	-0.0605728	0.252711	-0.353223	-0.0893921	0.13004
531	115.283	76.6272	79.2857	135.593	214.363	40.9515					-0.616732	-0.0620637	0.0423987	0.0106401	0.337568	-0.292716	-0.0968176	0.132855
534	132.762	97.3846	84.9118	136.423	198.466	44.5368					-0.558622	0.192012	0.116367	0.0168287	0.238377	-0.230793	-0.0376384	0.124411
537	133.373	90.4615	81.0168	134.631	228.426	44.4548					-0.556591	0.107272	0.0651581	0.00347283	0.425317	-0.23221	-0.0312634	0.135955
540	126.276	95.0059	83.6933	138.495	232.04	45.2826					-0.580184	0.162896	0.100347	0.0322754	0.447872	-0.217913	-0.00911765	0.143972
543	149.83	92.9586	79.9622	137.45	227.285	54.0368					-0.501879	0.137837	0.0512929	0.0244842	0.418197	-0.0667166	0.0105359	0.122853
546	133.99	88.4497	79.2395	138.147	213.705	46.7391					-0.554538	0.0826467	0.0417913	0.0296786	0.333466	-0.192757	-0.0432854	0.123029
549	136.347	84.6627	73.2059	137.299	220.055	40.8963					-0.546702	0.0362928	-0.0375347	0.0233543	0.373089	-0.29367	-0.0741951	0.128396
552	140.601	105.598	71.6765	137.093	214.395	43.0401					-0.53256	0.292541	-0.0576423	0.0218204	0.337773	-0.256643	-0.0324518	0.134986
555	118.469	86.2071	63.4328	142.364	219.572	46.7843					-0.606139	0.0551967	-0.166025	0.0611114	0.370071	-0.191976	-0.0796268	0.133855
558	118.357	89.8462	79.9664	146.418	211.413	45.9298					-0.606513	0.0997402	0.0513481	0.0913294	0.319163	-0.206735	-0.0419444	0.132014
561	129.936	70.0533	60.2479	135.851	202.975	35.7692					-0.568018	-0.14253	-0.207898	0.0125624	0.26651	-0.382221	-0.170266	0.119655
564	142.421	100.627	72.3992	136.253	198.398	40.2107					-0.526509	0.231702	-0.0481407	0.0155639	0.237952	-0.305511	-0.0658237	0.12348
567	140.81	86.858	61.5168	154.867	189.106	50.092					-0.531865	0.0631638	-0.191216	0.154297	0.179971	-0.134848	-0.0767495	0.10992
570	114.592	85.9704	57.7437	131.45	198.383	47.7241					-0.619031	0.0522994	-0.240822	-0.0202367	0.237858	-0.175745	-0.127613	0.12029
573	123.984	81.2426	67.395	138.181	213.97	42.6087					-0.587805	-0.00557007	-0.113933	0.0299312	0.335116	-0.264094	-0.101059	0.126517
576	137.939	83.3905	54.3277	131.446	205.579	42.3829					-0.541411	0.0207208	-0.285733	-0.0202703	0.282762	-0.267994	-0.135321	0.117971
579	124.022	108.456	68.8908	135.45	249.199	44.3328					-0.587677	0.327524	-0.0942669	0.00957724	0.554937	-0.234317	-0.00403705	0.165769
582	142.067	100.615	68.2227	130.769	217.02	49.2191					-0.527685	0.231558	-0.103051	-0.0253126	0.35415	-0.149924	-0.0367108	0.126905
585	134.032	100.379	62.2899	139.785	217.879	44.6187					-0.554399	0.228661	-0.181051	0.0418874	0.359509	-0.229379	-0.0557954	0.136304
588	127.794	77.8521	52.126	141.351	199.894	33.602					-0.575138	-0.0470706	-0.31468	0.0535566	0.247288	-0.419651	-0.175949	0.127332
591	137.556	102.272	60.8193	129.02	206.466	45.2258					-0.542683	0.251838	-0.200386	-0.0383472	0.288295	-0.218894	-0.0766963	0.128489
594	114.196	88.4911	63.9034	126.796	211.013	45.8595					-0.620346	0.0831534	-0.159838	-0.0549238	0.316664	-0.207949	-0.107206	0.128435
597	130.868	88.5266	72.6134	140.738	220.101	43.0585					-0.564918	0.0835879	-0.0453245	0.0489868	0.373372	-0.256326	-0.0601035	0.130895
600	119.495	70.3254	48.3908	155.674	217.338	45.4766					-0.602729	-0.139199	-0.363788	0.160317	0.35613	-0.214562	-0.133972	0.142112
603	130.775	97.3905	47.1134	136.733	219.433	41.4632					-0.565228	0.192084	-0.380583	0.0191386	0.369207	-0.283878	-0.10821	0.146996
606	111.871	77.497	56.6218	144.244	208.902	47					-0.628074	-0.0514172	-0.255572	0.075124	0.303493	-0.188251	-0.124116	0.129512
609	125.325	110.237	58.1891	140.991	217.063	37.3127					-0.583348	0.349325	-0.234966	0.0508756	0.354417	-0.355563	-0.0698765	0.157359
612	133.048	97.355	61.2941	140.796	217.275	33.1472					-0.55767	0.19165	-0.194144	0.0494251	0.355737	-0.427506	-0.0970847	0.14613
615	124.196	109.136	60.3403	141.185	200.481	42.6555					-0.5871	0.335853	-0.206684	0.0523253	0.25095	-0.263286	-0.0696567	0.142141
618	124.675	100.68	66.1134	140.71	222.662	46.3328					-0.585507	0.232355	-0.130782	0.0487841	0.389357	-0.199774	-0.0409281	0.141156
621	130.543	87.503	56.563	145.543	217.428	46.5268					-0.565998	0.0710588	-0.256345	0.0848039	0.356696	-0.196424	-0.084368	0.131835
624	122.026	99.0592	57.563	129.837	217.819	38.0552					-0.594316	0.21251	-0.243198	-0.03226	0.359132	-0.342739	-0.106812	0.145665
627	126.026	87.9882	48.563	123.835	213.025	46.3043					-0.581017	0.0769978	-0.361524	-0.0769981	0.329222	-0.200267	-0.135598	0.131442
630	145.849	98.1893	61.2017	142.618	233.096	42.2993					-0.515114	0.201862	-0.195358	0.0629994	0.454457	-0.269438	-0.0434319	0.143299
633	127.379	97.3491	59.0252	137.699	210.113	42.4883					-0.576517	0.191578	-0.223974	0.0263394	0.311053	-0.266174	-0.0896156	0.134083
636	126.939	93.6864	71.9622	142.509	226.597	48.5903					-0.577981	0.146745	-0.0538861	0.06219	0.413907	-0.160784	-0.0283017	0.135982
639	139.611	94.355	42.2311	142.208	201.091	48.5117					-0.535852	0.154929	-0.444772	0.0599472	0.254754	-0.162142	-0.112189	0.132694
642	124.434	90.9882	62.542	134.516	228.315	42.4816					-0.586309	0.113719	-0.177737	0.0026127	0.424626	-0.266289	-0.081563	0.141373
645	131.624	99.3077	51.9118	133.124	237.154	41.7391					-0.562406	0.215551	-0.317496	-0.00775809	0.479778	-0.279113	-0.0785741	0.15649
648	141.717	106.941	57.5588	139.344	238.295	48.2475					-0.52885	0.308982	-0.243253	0.0385989	0.486897	-0.166705	-0.0173883	0.152628
651	147.479	88.2604	54.8025	141.41	216.929	40.2926					-0.509694	0.0803296	-0.279491	0.0539948	0.353584	-0.304096	-0.100895	0.129575
654	119.035	86.3136	60.4202	127.536	212.35	47.6689					-0.604257	0.0565002	-0.205633	-0.0494097	0.32501	-0.176698	-0.109081	0.126294
657	130.276	96.0592	67.0882	133.808	204.758	45.413					-0.566885	0.175789	-0.117966	-0.00266512	0.277638	-0.21566	-0.0749583	0.123297
660	117.521	118.651	49.374	136.299	257.421	40.1438					-0.609292	0.452317	-0.350862	0.0159008	0.606239	-0.306666	-0.0320606	0.196179
663	115.154	89.1479	57.0546	151.932	235.131	39.8027					-0.61716	0.0911928	-0.249882	0.132425	0.467157	-0.312557	-0.0814708	0.157616
666	136.521	85.1775	50.0504	135.425	218.539	35.2174					-0.546125	0.0425941	-0.341969	0.00939165	0.363627	-0.391751	-0.144039	0.138841
669	130.511	101.373	66.063	126.679	225.302	39.8696					-0.566105	0.240829	-0.131445	-0.0558011	0.405828	-0.311402	-0.0696826	0.145074
672	131.424	103.74	67.2143	146.995	213.788	40.8863					-0.563069	0.269799	-0.116308	0.0956301	0.333984	-0.293842	-0.0456344	0.141174
675	121.154	107.68	64.6471	132.448	218.071	50.1789					-0.597213	0.318036	-0.15006	-0.0127996	0.360704	-0.133347	-0.03578	0.14384
678	124.518	97.1124	69.2731	130.873	201.856	50.8528					-0.586031	0.18868	-0.0892407	-0.0245367	0.259532	-0.121708	-0.0622174	0.122003
681	141.543	93.5976	66.3824	131.412	210.703	40.9097					-0.529427	0.145658	-0.127246	-0.0205229	0.314731	-0.293438	-0.0850408	0.123813
684	136.508	112.574	59.6176	145.357	228.809	44.2308					-0.546168	0.377934	-0.216185	0.0834212	0.427707	-0.236079	-0.0182283	0.156152
687	134.479	105.219	66.3361	148.631	208.373	53.5067					-0.552913	0.287906	-0.127855	0.107822	0.300192	-0.0758721	-0.01012	0.130618
690	123.158	114.923	52.2563	139.224	207.431	41.0217					-0.590553	0.406688	-0.312967	0.0377052	0.294314	-0.291504	-0.0760527	0.158157
693	141.003	91.8107	61.979	135.088	235.229	47.6806					-0.531223	0.123786	-0.185139	0.00687908	0.46777	-0.176496	-0.0490706	0.137521
696	128.334	97.9586	52.2857	129.568	231.111	37.6906					-0.573342	0.199038	-0.31258	-0.0342664	0.442072	-0.349036	-0.104686	0.154781
699	139.984	97.0533	62.2857	149.471	209.781	44.1706					-0.534612	0.187957	-0.181107	0.114078	0.308979	-0.237118	-0.0569705	0.128992
702	129.791	110.284	51.063	151.5	217.103	43.4766					-0.568499	0.349904	-0.328656	0.129204	0.354669	-0.249104	-0.0520804	0.157258
705	127.891	87.9172	59.6555	136.823	204.239	40.2057					-0.574817	0.0761287	-0.215687	0.0198131	0.274401	-0.305597	-0.12096	0.124368
708	135.408	86.8166	47.8824	143.136	209.191	41.7308					-0.549824	0.0626571	-0.370472	0.0668611	0.3053	-0.279257	-0.127456	0.131868
711	128.588	75.6272	56.2059	131.093	215.987	45.7542					-0.572497	-0.074304	-0.26104	-0.0229006	0.347706	-0.209767	-0.132134	0.124108
714	118.92	134.397	61.3571	138.921	225.521	43.5301					-0.604642	0.645047	-0.193315	0.0354453	0.407195	-0.24818	0.00692497	0.186853
717	137.675	97.8402	74.2605	138.871	213.7	44.4314					-0.542288	0.197589	-0.0236695	0.0350742	0.333435	-0.232614	-0.0387456	0.127957
720	136.167	93.1302	62.7647	161.855	234.118	38.6555					-0.547301	0.139937	-0.174809	0.206387	0.460838	-0.332371	-0.0412198	0.153289
723	135.331	90.5444	54.0924	141.602	203.97	39.9415					-0.55008	0.108286	-0.288827	0.0554282	0.272719	-0.31016	-0.118772	0.127376
726	132.768	102.515	52.3361	142.794	220.657	36.2993					-0.5586	0.254807	-0.311918	0.064315	0.376845	-0.373065	-0.0912694	0.153796
729	132.244	77.9172	59.2353	143.726	208.121	47.2542					-0.560343	-0.0462738	-0.221211	0.0712624	0.298621	-0.183861	-0.106968	0.118949
732	145.318	95.9172	62.5168	145.622	211.675	43.5953					-0.516878	0.174051	-0.178068	0.0853942	0.320798	-0.247054	-0.0602929	0.126305
735	151.83	82.6686	71.7647	151.084	225.159	45.4097					-0.49523	0.0118845	-0.0564827	0.126101	0.404932	-0.215717	-0.0374187	0.124712
738	141.254	94.0059	64.7899	132.9	224.862	38.7508					-0.53039	0.150656	-0.148183	-0.00942693	0.403078	-0.330725	-0.0774985	0.136854
741	146.08	88.9704	55.4748	158.093	241.811	41.1839					-0.514344	0.0890201	-0.270652	0.178344	0.508839	-0.288702	-0.0495826	0.153302
744	152.357	89.503	59.9748	137.315	218.572	39.9097					-0.493477	0.0955393	-0.211489	0.0234728	0.363832	-0.310709	-0.0888053	0.126428
747	153.473	79.5917	49.0084	138.568	229.935	42.0217					-0.489768	-0.0257775	-0.355668	0.032815	0.434732	-0.274232	-0.112983	0.136103
750	139.717	93.2722	61.8529	142.923	221.224	50.8411					-0.5355	0.141675	-0.186797	0.0652765	0.380382	-0.12191	-0.0428122	0.128393
753	149.666	96.3787	62.0924	153.172	255.345	47.296					-0.502425	0.1797	-0.183648	0.141667	0.593288	-0.183139	0.00757374	0.155317
756	146.087	91.3195	67.8277	147.862	245.264	45.3746					-0.514323	0.117774	-0.108244	0.102089	0.530387	-0.216324	-0.0147734	0.144607
759	141.379	114.314	66.8992	158.511	229.97	49.5217					-0.529973	0.399227	-0.120451	0.181463	0.434952	-0.144698	0.0367534	0.151625
762	131.858	106.675	64.0588	134.333	225.348	54.7709					-0.561626	0.305724	-0.157795	0.00124722	0.406111	-0.0540377	-0.0100627	0.141543
765	135.518	86.8876	70.1933	152.64	214.146	47.1906					-0.54946	0.0635262	-0.0771425	0.137704	0.336216	-0.184959	-0.045686	0.124577
768	147.794	86.6686	65.8698	142.473	208.587	50.2759					-0.508646	0.0608455	-0.133985	0.0619209	0.301528	-0.131672	-0.0583348	0.111363
771	149.408	82.2485	54.7437	137.464	217.506	48.8211					-0.50328	0.0067424	-0.280264	0.0245856	0.357183	-0.156798	-0.0919718	0.120264
774	143.56	105.385	67.979	153.873	204.4	39.1271					-0.522725	0.289934	-0.106255	0.146894	0.275406	-0.324226	-0.0401619	0.136804
777	153.73	105.929	63.7899	143.319	223.123	44.6522					-0.488912	0.296598	-0.16133	0.0682273	0.392232	-0.2288	-0.020331	0.136797
780	129.608	86.2485	51.1134	139.339	229.627	53.1171					-0.569109	0.0557034	-0.327993	0.0385654	0.432814	-0.0826009	-0.0754366	0.140956

## Sheet: F
	CCHa1-GC6m 50mM glucose001-1.tif	CCHa1-GC6m 50mM glucose002-1.tif	CCHa1-GC6m 50mM glucose003-1.tif	CCHa1-GC6m 50mM glucose005.tif	CCHa1-GC6m 50mM glucose006-1.tif	CCHa1-GC6m 50mM glucose009-1.tif				CCHa1-GC6m 50mM glucose001-1.tif	CCHa1-GC6m 50mM glucose002-1.tif	CCHa1-GC6m 50mM glucose003-1.tif	CCHa1-GC6m 50mM glucose005.tif	CCHa1-GC6m 50mM glucose006-1.tif	CCHa1-GC6m 50mM glucose009-1.tif
time（sec）	Mean1	Mean1	Mean1	Mean1	Mean1	Mean1				F/F0	F/F0	F/F0	F/F0	F/F0	F/F0	mean	SEM
0	7.2436	542.89	983.883	6.3	76.5341	24.3506				-0.055131	-0.009089	0.0354002	0.840693	0.0063578	-0.0265723	0.131943	0.142295
3	11.3711	506.896	981.964	6.9625	81.2557	28.8417				0.483268	-0.0747862	0.0333808	1.03426	0.0684428	0.152962	0.282921	0.169092
6	6.3654	534.825	865.442	2.225	86.9091	24.6737				-0.169685	-0.0238097	-0.089243	-0.349914	0.14278	-0.0136562	-0.0839213	0.0678429
9	8.7054	518.039	986.171	5.9625	67.1193	25.5444				0.135549	-0.0544478	0.0378082	0.742085	-0.117439	0.0211505	0.127451	0.127832
12	9.0255	600.097	950.595	3.325	81.3636	21.4863				0.177303	0.0953297	0.000368858	-0.0285231	0.0698616	-0.141074	0.0288777	0.0451357
15	8.7025	570.357	920.793	2.7625	79.3182	25.0662				0.135171	0.0410461	-0.0309934	-0.192871	0.0429663	0.00203418	-0.000441115	0.0447082
18	6.847	497.669	951.703	1.55	92.7955	23.5057				-0.106864	-0.0916284	0.00153498	-0.547131	0.220181	-0.0603476	-0.0973758	0.102372
21	6.9858	540.812	1013.15	3.3375	75.6705	25.1357				-0.0887589	-0.0128817	0.066203	-0.0248709	-0.0049978	0.00481248	-0.0100823	0.0203991
24	10.1926	517.669	973.117	3.7687	67.7727	23.0808				0.329542	-0.0551233	0.0240707	0.101114	-0.108847	-0.0773332	0.0355706	0.0665023
27	7.5892	566.195	1048.41	2.05	90.2557	22.2956				-0.0100502	0.0334489	0.103311	-0.401044	0.186785	-0.108722	-0.032712	0.0842651
30	5.3711	540.604	919.144	4.7375	87.8807	22.9919				-0.299383	-0.013261	-0.0327283	0.384172	0.155556	-0.080887	0.0189113	0.0943504
33	9.0708	534.39	917.514	3.325	76.9545	25.643				0.183212	-0.0246036	-0.0344444	-0.0285231	0.0118857	0.0250921	0.0221032	0.0336708
36	6.9972	534.571	963.072	1.5438	68.2386	29.105				-0.0872719	-0.0242718	0.0134997	-0.548943	-0.102721	0.163487	-0.0977034	0.0982734
39	6.7535	507.461	897.045	3.35	71.517	22.7754				-0.119061	-0.0737552	-0.0559847	-0.0212188	-0.0596128	-0.0895417	-0.0698623	0.0135237
42	7.2691	523.578	954.586	1.2188	76.8295	29.7835				-0.0518047	-0.0443377	0.00456883	-0.643899	0.0102421	0.190611	-0.0891033	0.11663
45	6.1473	582.656	973.09	1.3625	65.9489	24.6769				-0.198134	0.0634944	0.0240422	-0.601914	-0.132829	-0.0135283	-0.143145	0.100175
48	9.8414	548.513	953.514	5.8562	69.2045	24.2375				0.283731	0.00117513	0.00344059	0.711026	-0.0900202	-0.0310935	0.146377	0.124712
51	8.5354	598.084	939.991	2	65.2727	22.3893				0.113374	0.0916555	-0.01079	-0.415653	-0.14172	-0.104976	-0.0780183	0.0793141
54	5.3654	585.091	915.243	5.1875	62.9545	29.5687				-0.300127	0.0679391	-0.0368336	0.51565	-0.172202	0.182024	0.0427417	0.117441
57	7.2805	565.883	902.856	2.8063	81.5	26.7771				-0.0503177	0.03288	-0.0498696	-0.180073	0.0716551	0.0704283	-0.0175496	0.0394855
60	5.3314	588.974	943.838	2.2438	71.767	23.3926				-0.304562	0.0750267	-0.00674174	-0.344421	-0.0563255	-0.0648688	-0.116982	0.0688791
63	10.6516	542.214	906.712	3.6437	71.6705	25.3037				0.389415	-0.0103216	-0.0458118	0.0645926	-0.0575944	0.0115284	0.0586347	0.0685185
66	7.6006	476.195	966.532	6.0875	81.375	21.0533				-0.0085632	-0.130824	0.0171403	0.778606	0.0700115	-0.158384	0.0946646	0.141413
69	10.3484	525.429	915.901	5.0312	65.9432	25.3312				0.349865	-0.0409597	-0.0361414	0.469983	-0.132903	0.0126277	0.103745	0.0999197
72	7.8555	530.909	682.036	1.7938	61.983	23.7674				0.0246864	-0.0309564	-0.282252	-0.475899	-0.184977	-0.049886	-0.166547	0.0770261
75	10.3059	531.494	684.468	3.7125	43.1023	27.6866				0.344321	-0.0298898	-0.279692	0.0846941	-0.433242	0.106786	-0.0345037	0.115009
78	12.6657	531.831	688.18	2.4625	57.6818	20.252				0.652138	-0.0292734	-0.275786	-0.280523	-0.241534	-0.190416	-0.0608989	0.147562
81	5.8499	472.929	535.558	4.3187	51.6591	21.2617				-0.236928	-0.136786	-0.436399	0.26181	-0.320727	-0.150053	-0.169847	0.0976605
84	6.3201	457.708	341.595	1.7125	36.0682	24.42				-0.175594	-0.164567	-0.640519	-0.499653	-0.525734	-0.023798	-0.338311	0.101336
87	6.6714	401.682	206.775	2.3688	48.1705	19.7205				-0.12977	-0.266829	-0.782398	-0.307899	-0.366599	-0.211663	-0.344193	0.0936963
90	8.8244	513.299	251.189	0.35	39.7443	24.7189				0.151072	-0.0630999	-0.735658	-0.897739	-0.477397	-0.0118493	-0.339112	0.174356
93	5.3569	388.305	228.604	2.225	37.6534	23.7754				-0.301236	-0.291245	-0.759426	-0.349914	-0.50489	-0.0495662	-0.376046	0.0972353
96	8.5042	429.61	141.027	1.0688	29.875	21.5218				0.109304	-0.215852	-0.851589	-0.687725	-0.607169	-0.139655	-0.398781	0.151735
99	5.0142	359.591	160.36	1.7938	31.0227	22.2989				-0.345938	-0.343656	-0.831243	-0.475899	-0.592078	-0.10859	-0.449567	0.100813
102	6.745	390.455	156.676	2.9375	37.4318	25.3037				-0.120169	-0.287321	-0.835121	-0.14174	-0.507804	0.0115284	-0.313438	0.126892
105	3.6771	307.682	117.09	1.525	41.8807	20.1244				-0.520352	-0.438403	-0.876779	-0.554435	-0.449305	-0.195517	-0.505798	0.0902242
108	5.6884	357.279	113.036	1.4937	29.358	17.8756				-0.257994	-0.347875	-0.881045	-0.56358	-0.613967	-0.285414	-0.491646	0.0982453
111	7.7224	342.396	116.126	1.0562	27.9205	22.8998				0.00732462	-0.37504	-0.877793	-0.691406	-0.632869	-0.0845688	-0.442392	0.14407
114	6.2833	341.37	82.0811	0.2562	36.7955	18.42				-0.180394	-0.376913	-0.913621	-0.925145	-0.516171	-0.263651	-0.529316	0.131668
117	4.6402	364.967	91.8018	2.7188	25.9773	15.0953				-0.394723	-0.333842	-0.903391	-0.205639	-0.658421	-0.396558	-0.482096	0.103592
120	5.255	286.052	75.2883	2.1063	23.4716	17.4733				-0.314528	-0.477883	-0.92077	-0.384595	-0.691369	-0.301496	-0.515107	0.0999852
123	7.2323	312.695	67.8468	2.7625	29.7784	14.7108				-0.056605	-0.429253	-0.928601	-0.192871	-0.60844	-0.411928	-0.437949	0.125969
126	5.881	299.201	77.7477	3.6063	51.6818	21.5202				-0.232871	-0.453882	-0.918181	0.0536653	-0.320429	-0.139719	-0.335236	0.135901
129	5.7025	292.539	76.9279	5.2875	24.3409	17.4863				-0.256155	-0.466042	-0.919044	0.544867	-0.679938	-0.300976	-0.346215	0.20478
132	6.5354	357.292	93.036	3.2313	35.0852	15.3215				-0.14751	-0.347851	-0.902093	-0.0558997	-0.53866	-0.387515	-0.396588	0.123327
135	6.0057	309.481	78.7117	2.8812	30.5682	17.7254				-0.216605	-0.43512	-0.917167	-0.15819	-0.598054	-0.291418	-0.436092	0.116046
138	4.5127	309.169	54.018	4.3812	24.3011	16.1115				-0.411355	-0.435689	-0.943154	0.280071	-0.680461	-0.355935	-0.42442	0.166927
141	7.3513	283.481	71.2883	0.65	31.4375	16.8061				-0.0410824	-0.482576	-0.924979	-0.810087	-0.586624	-0.328168	-0.528919	0.131616
144	4.1983	322.104	68.8288	4.7188	37.0341	19.3538				-0.452366	-0.412079	-0.927567	0.378708	-0.513033	-0.226322	-0.358776	0.175152
147	6.9065	275.688	60.9009	1.6812	23.7614	18.6446				-0.0991029	-0.496799	-0.93591	-0.508798	-0.687558	-0.254673	-0.49714	0.121948
150	6.3343	271.467	68.4414	4.625	24.8182	19.4152				-0.173742	-0.504503	-0.927975	0.351302	-0.673662	-0.223867	-0.358741	0.182668
153	7.5127	296.344	61.9369	3.1437	26.9545	17.2439				-0.020029	-0.459097	-0.93482	-0.0814941	-0.645571	-0.310666	-0.408613	0.141797
156	5.8244	269.552	80.4504	1.7875	22.6477	16.7383				-0.240254	-0.508	-0.915337	-0.47774	-0.702202	-0.330878	-0.529068	0.100822
159	5.4051	335.604	71.4234	3.9562	37.0966	20.0081				-0.294948	-0.387438	-0.924837	0.155897	-0.512212	-0.200166	-0.360617	0.145932
162	6.2748	308.533	59.955	3.1875	30.733	19.0307				-0.181503	-0.43685	-0.936906	-0.0686969	-0.595887	-0.239238	-0.409847	0.130482
165	7	288.942	81.5225	0.6687	34.3636	15.5347				-0.0869066	-0.472608	-0.914209	-0.804624	-0.548148	-0.378992	-0.534248	0.121886
168	2.5552	294.208	63.5135	1.6875	24.392	17.525				-0.666695	-0.462996	-0.933161	-0.506957	-0.679266	-0.299429	-0.591417	0.0892665
171	3.2096	293.338	82.7838	2.2188	26.4318	17.433				-0.581334	-0.464584	-0.912882	-0.351725	-0.652444	-0.303107	-0.544346	0.0913843
174	7.6006	325.552	61.8829	2.5438	19.483	16.6171				-0.0085632	-0.405785	-0.934877	-0.256769	-0.743815	-0.335723	-0.447589	0.137673
177	5.8697	304.403	46.4955	1.8	31.9659	19.1389				-0.234345	-0.444388	-0.95107	-0.474088	-0.579676	-0.234913	-0.486413	0.108522
180	6.2096	293.253	58.4685	2.2062	22.6307	14.3796				-0.190008	-0.464739	-0.93847	-0.355407	-0.702426	-0.425168	-0.512703	0.108951
183	8.7904	332.091	39	0.5688	30.5568	13.4879				0.146637	-0.39385	-0.958958	-0.833812	-0.598204	-0.460814	-0.5165	0.159272
186	6.0878	285.377	63.036	1.3625	30.0909	13.2246				-0.205896	-0.479115	-0.933663	-0.601914	-0.60433	-0.47134	-0.549376	0.097033
189	8.5609	320.279	49.4234	2.2625	33.0057	15.8094				0.1167	-0.415409	-0.947989	-0.338957	-0.566003	-0.368011	-0.419945	0.141118
192	4.2521	329.987	32.1892	3.2938	27.8352	11.4426				-0.445348	-0.39769	-0.966125	-0.0376389	-0.633991	-0.542576	-0.503895	0.124389
195	5.0737	308.377	48.018	4.5563	39.2557	18.378				-0.338177	-0.437135	-0.949468	0.33123	-0.483821	-0.26533	-0.357117	0.168912
198	7.0425	295.818	50.1802	1.675	35.4545	14.168				-0.0813628	-0.460057	-0.947192	-0.510609	-0.533804	-0.433627	-0.494442	0.112888
201	9.4816	317.844	41.7568	2.8625	29.8295	14.4443				0.236798	-0.419854	-0.956057	-0.163653	-0.607768	-0.422582	-0.388853	0.164712
204	4.0142	309.429	65.7838	2.1375	34.4489	14.3861				-0.47638	-0.435214	-0.930772	-0.375479	-0.547026	-0.424908	-0.53163	0.083201
207	9.102	315.11	47.2883	2.175	36.983	15.4927				0.187282	-0.424844	-0.950236	-0.364523	-0.513705	-0.380671	-0.407783	0.148602
210	4.9943	334.519	51.5045	1.4937	40.9432	15.3166				-0.348534	-0.389417	-0.945799	-0.56358	-0.461632	-0.387711	-0.516112	0.0913734
213	4.6346	305.143	55.4775	1.2563	29.9375	10.3554				-0.395454	-0.443037	-0.941618	-0.632942	-0.606348	-0.586038	-0.600906	0.0784208
216	6.3768	279.877	76.8018	1.8062	34.9375	18.7447				-0.168198	-0.489154	-0.919177	-0.472276	-0.540602	-0.250671	-0.473346	0.10743
219	5.8074	263.766	44.6126	5.275	46.4489	15.4459				-0.242472	-0.51856	-0.953051	0.541215	-0.389237	-0.382542	-0.324108	0.199707
222	5.0085	289.649	52.7838	4.5875	32.9943	18.4733				-0.346682	-0.471316	-0.944452	0.340346	-0.566153	-0.26152	-0.374963	0.172771
225	8.2833	322.461	65.2793	2.3438	33.142	19.3489				0.0804895	-0.411427	-0.931303	-0.315204	-0.564211	-0.226518	-0.394695	0.138728
228	3.6147	300.312	77.1532	6.0813	35.5511	19.1826				-0.528492	-0.451855	-0.918807	0.776795	-0.532534	-0.233166	-0.314676	0.236285
231	8.4108	320.071	49.2162	1.475	32.1534	14.9241				0.0971208	-0.415789	-0.948207	-0.569044	-0.57721	-0.403401	-0.469422	0.138922
234	6.9745	312.214	62.1081	2.4	31.6648	17.609				-0.0902329	-0.43013	-0.93464	-0.298784	-0.583635	-0.296071	-0.438915	0.119497
237	5.2323	326.675	37.4685	0.325	37.3977	16.8207				-0.317489	-0.403735	-0.96057	-0.905044	-0.508252	-0.327584	-0.570446	0.11815
240	3.5779	314.773	61.7207	4.5687	33.3523	18.2391				-0.533292	-0.42546	-0.935048	0.334853	-0.561446	-0.270883	-0.398546	0.171991
243	8.1331	297.156	40.8378	0.875	36.8068	16.0824				0.0608971	-0.457615	-0.957024	-0.744348	-0.516022	-0.357098	-0.495202	0.14207
246	5.8839	313.318	48.0631	2.175	28.1023	18.2908				-0.232493	-0.428115	-0.94942	-0.364523	-0.630479	-0.268816	-0.478974	0.110284
249	3.762	278.422	65.009	0.5562	37.2727	12.916				-0.509278	-0.491809	-0.931587	-0.837493	-0.509896	-0.483676	-0.62729	0.082355
252	5.1501	312.052	52.1171	3.8063	38.2841	17.5057				-0.328211	-0.430426	-0.945154	0.1121	-0.496597	-0.300201	-0.398081	0.139617
255	6.187	304.493	58.3514	2.1125	50.8295	17.4976				-0.192956	-0.444222	-0.938593	-0.382783	-0.331636	-0.300524	-0.431786	0.107037
258	4.6516	324.526	56.5225	2.325	34.1307	17.9386				-0.393236	-0.407658	-0.940518	-0.320697	-0.551211	-0.282895	-0.482702	0.0990106
261	5.1048	306.403	48.3604	3.15	43.8182	15.8885				-0.33412	-0.440738	-0.949107	-0.0796535	-0.423828	-0.364849	-0.432049	0.116301
264	6.6147	342.058	56.1261	2.6437	33.858	17.9386				-0.137166	-0.375657	-0.940935	-0.227581	-0.554796	-0.282895	-0.419838	0.119349
267	2.7337	295.195	55.1892	2.4688	44.9659	13.1309				-0.643411	-0.461195	-0.941921	-0.278682	-0.408737	-0.475086	-0.534839	0.0945191
270	3.9292	327.221	66.6487	1.725	50.625	17.4297				-0.487468	-0.402739	-0.929861	-0.496001	-0.334325	-0.303239	-0.492272	0.0931341
273	10.034	305.487	61.8559	1.8625	50.6989	16.9774				0.308854	-0.442409	-0.934905	-0.455827	-0.333353	-0.32132	-0.36316	0.162891
276	9.7932	325.649	80.3604	3.3312	36.6307	17.2682				0.277444	-0.405607	-0.915432	-0.0267116	-0.518338	-0.309695	-0.31639	0.167749
279	3.9065	343.214	79.7838	1.2687	50.7045	16.3554				-0.490429	-0.373547	-0.916039	-0.629319	-0.333279	-0.346185	-0.5148	0.0923823
282	5.5977	335.831	68.5586	1.3563	60.8125	17.4346				-0.269825	-0.387023	-0.927852	-0.603725	-0.200368	-0.303043	-0.448639	0.111401
285	7.6261	360.455	123.649	1.4688	52.9886	15.3603				-0.00523693	-0.342079	-0.869877	-0.570856	-0.303245	-0.385964	-0.412876	0.118002
288	6.5014	378.383	113.306	2.7875	51.0227	16.8708				-0.151945	-0.309355	-0.880761	-0.185566	-0.329095	-0.325581	-0.363717	0.107939
291	6.5467	401.526	173.477	2.8625	48.4432	12.9208				-0.146036	-0.267113	-0.817439	-0.163653	-0.363013	-0.483484	-0.373457	0.102694
294	7.8952	410.838	214.297	2.6875	41.0568	13.7221				0.029865	-0.250117	-0.774482	-0.214784	-0.460138	-0.451452	-0.353518	0.111817
297	6.3796	389.786	290.505	5.8875	55.0284	11.8368				-0.167833	-0.288542	-0.694284	0.720172	-0.276424	-0.526818	-0.205622	0.201028
300	5.966	405.883	335.505	1.6625	66.5795	12.3635				-0.221784	-0.259161	-0.646928	-0.514262	-0.124537	-0.505763	-0.378739	0.0836619
303	9.1955	478.266	393.189	2.5312	65.1364	15.3893				0.199479	-0.127043	-0.586223	-0.26045	-0.143512	-0.384805	-0.217092	0.108523
306	8.5552	456.221	427.198	1.6562	77.6193	17.2989				0.115957	-0.167282	-0.550433	-0.516102	0.0206272	-0.308468	-0.234283	0.112103
309	9.6714	385.279	488.396	1.075	85.8523	16.609				0.261556	-0.296768	-0.486031	-0.685913	0.128884	-0.336047	-0.23572	0.14825
312	7.4136	485.318	539.387	3.975	102.29	14.1971				-0.0329558	-0.114171	-0.43237	0.16139	0.345023	-0.432464	-0.0842579	0.127878
315	9.8215	491.11	555.784	3.05	73.2045	18.546				0.281135	-0.103599	-0.415115	-0.108871	-0.0374236	-0.258614	-0.107081	0.0954684
318	10.9773	444.682	624.144	0.4437	64.1193	18.3974				0.4319	-0.188343	-0.343175	-0.870363	-0.156886	-0.264555	-0.231904	0.170219
321	6.2918	498.967	616.45	1.5562	72.5398	19.0129				-0.179286	-0.089258	-0.351272	-0.54532	-0.0461638	-0.23995	-0.241875	0.0751803
324	7.3314	430.039	668.558	1.9813	80.2159	15.5574				-0.0436782	-0.21507	-0.296435	-0.421117	0.0547703	-0.378085	-0.216602	0.0769901
327	9.728	462.955	658.811	3.6375	81	15.4087				0.268939	-0.154991	-0.306693	0.0627811	0.0650806	-0.384029	-0.0748187	0.102059
330	8.1643	511.545	668.261	0.6938	74.8693	17.7415				0.0649669	-0.0663001	-0.296748	-0.79729	-0.0155329	-0.290774	-0.233613	0.127761
333	9.0737	477.87	689.279	1.0625	101.239	19.0291				0.183591	-0.127766	-0.274629	-0.689566	0.331201	-0.239302	-0.136079	0.147965
336	7.4249	468.61	712.694	1.3062	76.3807	15.9855				-0.0314818	-0.144667	-0.249989	-0.618363	0.00434072	-0.360971	-0.233522	0.0948527
339	6.0793	472.071	609.486	3.4125	96.6307	15.9645				-0.207004	-0.13835	-0.3586	-0.00295791	0.270611	-0.361811	-0.133019	0.0980761
342	5.5977	495.662	744.793	0.1937	86.9773	17.7916				-0.269825	-0.0952908	-0.216209	-0.943406	0.143677	-0.288772	-0.278304	0.148095
345	6.1246	480.623	669.243	0.3562	86.0398	18.0905				-0.201095	-0.122741	-0.295714	-0.895928	0.13135	-0.276823	-0.276825	0.139012
348	4.3768	520.292	666.847	1.6688	94.1989	17.0646				-0.429082	-0.050335	-0.298236	-0.512421	0.238635	-0.317834	-0.228212	0.113085
351	7.5411	499.162	731.685	1.0875	73.7841	18.9709				-0.0163245	-0.0889024	-0.230003	-0.682261	-0.0298023	-0.241629	-0.21482	0.101479
354	7.1671	480.403	661.46	1.3312	83.9602	18.0533				-0.0651098	-0.123144	-0.303906	-0.611059	0.104005	-0.27831	-0.212921	0.100236
357	8.8839	510.091	661.054	2.575	95.0227	15.4426				0.158833	-0.0689549	-0.304332	-0.247653	0.249467	-0.382674	-0.0992191	0.105442
360	8.3399	498.084	643.865	3.1188	76.3182	20.3279				0.0878725	-0.0908698	-0.322422	-0.0887693	0.0035189	-0.187382	-0.0996752	0.0586879
363	10.9065	461.682	696.558	1.8563	86.517	12.9548				0.422665	-0.157314	-0.266969	-0.457638	0.137624	-0.482125	-0.13396	0.144662
366	4.7564	498.643	700.712	4.2188	80.9886	17.1099				-0.379566	-0.0898504	-0.262598	0.232622	0.0649307	-0.316023	-0.125081	0.0975413
369	11.2153	481.149	685.712	1.3563	99.2784	14.1438				0.462945	-0.12178	-0.278384	-0.603725	0.305426	-0.434594	-0.111685	0.171118
372	8.0312	507.766	661.198	2.825	84.8068	17.1502				0.0476051	-0.0731981	-0.304181	-0.17461	0.115137	-0.314412	-0.117276	0.0730816
375	6.4419	498.695	669.54	0.5188	103.835	19.7399				-0.159706	-0.0897557	-0.295402	-0.84842	0.365344	-0.210887	-0.206471	0.159458
378	4.0057	494.714	609.108	2.5375	70.5625	14.6737				-0.477489	-0.0970211	-0.358998	-0.25861	-0.0721636	-0.413411	-0.279615	0.0683557
381	10.5694	468.117	666.432	1.1688	82.267	19.0759				0.378693	-0.145568	-0.298672	-0.658508	0.0817405	-0.237431	-0.146624	0.143933
384	8.1926	470.688	659.937	1.925	81.4034	18.5945				0.0686584	-0.140875	-0.305508	-0.437566	0.0703849	-0.256675	-0.16693	0.0842617
387	7.796	467.662	641.288	3.125	78.0852	14.4491				0.0169251	-0.146398	-0.325133	-0.0869578	0.0267534	-0.42239	-0.1562	0.074773
390	4.0142	357.234	692.225	1.0187	101.892	15.2795				-0.47638	-0.347958	-0.271529	-0.702363	0.339792	-0.389194	-0.307939	0.142948
393	5.9405	318.857	629.955	0.5437	70.2727	14.8885				-0.22511	-0.418005	-0.33706	-0.841145	-0.0759742	-0.404825	-0.383686	0.105341
396	7.864	403.26	684.676	1.95	92.3409	12.6187				0.0257952	-0.263949	-0.279474	-0.430262	0.214204	-0.495561	-0.204874	0.111533
399	8.153	310.493	679.279	0.6562	91.517	21.6688				0.0634929	-0.433271	-0.285153	-0.808276	0.20337	-0.133779	-0.232269	0.148542
402	14.3569	266.26	643.072	2.975	74.7898	18.2811				0.872741	-0.514009	-0.323256	-0.130784	-0.0165783	-0.269204	-0.0635148	0.199668
405	7.3541	290.208	618.081	0	72.0455	17.1454				-0.0407171	-0.470297	-0.349555	-1	-0.0526634	-0.314604	-0.371306	0.143709
408	3.3541	275.286	661.234	2.2375	78.483	14.5994				-0.562485	-0.497534	-0.304143	-0.346262	0.0319842	-0.416382	-0.349137	0.0855077
411	7.9093	241.584	627.586	1.2	76.2443	17.1696				0.0317042	-0.559047	-0.339553	-0.649392	0.00254718	-0.313636	-0.304563	0.114363
414	8.1133	219.792	683.342	0.4	107.284	14.6236				0.0583144	-0.598824	-0.280877	-0.883131	0.410694	-0.415414	-0.284873	0.189308
417	10.2578	204.403	646.847	2.3312	87.8864	16.21				0.338047	-0.626913	-0.319283	-0.318885	0.155631	-0.351997	-0.187234	0.14705
420	8.3456	197.727	464.631	2.225	93.7727	16.6543				0.088616	-0.639098	-0.511041	-0.349914	0.233031	-0.334236	-0.252107	0.139591
423	6.0878	184.552	791.486	1.6688	74.3864	17.1244				-0.205896	-0.663146	-0.16707	-0.512421	-0.0218826	-0.315443	-0.31431	0.0965889
426	6.2493	160.643	681.108	1.9312	71.8466	15.8772				-0.184829	-0.706786	-0.283228	-0.435755	-0.0552788	-0.365301	-0.33853	0.0917778
429	7.0057	176.377	678.189	1.7	93.4943	16.1955				-0.0861631	-0.678068	-0.2863	-0.503305	0.22937	-0.352577	-0.279507	0.130468
432	7.949	126.468	826.558	1.3	75.8864	15.517				0.0368828	-0.769165	-0.130162	-0.620174	-0.0021589	-0.3797	-0.310746	0.136544
435	7.0198	170.273	707.685	0.3125	73.767	16.0517				-0.0843239	-0.689209	-0.25526	-0.908696	-0.0300272	-0.358325	-0.38764	0.141506
438	3.8697	136.429	657.477	0.5063	61.8864	14.0743				-0.495229	-0.750983	-0.308096	-0.852073	-0.186247	-0.437373	-0.505	0.104245
441	7.8215	101.831	702.486	2.075	68.9489	11.6704				0.0202514	-0.814132	-0.26073	-0.39374	-0.0933811	-0.53347	-0.345867	0.12407
444	6.7762	111.481	667	0.6438	67.5227	13.9192				-0.1161	-0.79652	-0.298075	-0.811899	-0.112134	-0.443573	-0.429717	0.128756
447	8.0935	122.773	681.811	0.4875	45.3636	10.2278				0.0557316	-0.775909	-0.282489	-0.857565	-0.403508	-0.591138	-0.475813	0.138352
450	6.4108	100.682	610.883	2.7875	37.2614	16.7189				-0.163763	-0.81623	-0.357131	-0.185566	-0.510045	-0.331653	-0.394065	0.0989014
453	11.8357	119.156	538.054	0.5562	43.6534	15.0307				0.543871	-0.78251	-0.433773	-0.837493	-0.425995	-0.39914	-0.389173	0.202462
456	6.3088	138.5	600.901	1.3687	32.7614	11.1922				-0.177068	-0.747202	-0.367635	-0.600102	-0.569216	-0.552586	-0.502302	0.0817434
459	5.9547	134.013	505.658	3.075	36.8239	16.2019				-0.223258	-0.755392	-0.467865	-0.101566	-0.515797	-0.352321	-0.4027	0.094313
462	6.3626	119.604	525.036	0.15	35.3182	8.0743				-0.17005	-0.781693	-0.447472	-0.956174	-0.535596	-0.677226	-0.594702	0.11224
465	7.8697	106.779	414.216	5.1188	35.3182	13.441				0.0265387	-0.805101	-0.564095	0.495578	-0.535596	-0.462689	-0.307561	0.195455
468	7.1445	124.857	342.207	0.725	31.3068	14.6559				-0.0680578	-0.772104	-0.639874	-0.788174	-0.588342	-0.414123	-0.545113	0.110483
471	11.4731	112.812	322.649	0.2937	25.483	13.6268				0.496573	-0.79409	-0.660457	-0.914189	-0.66492	-0.455262	-0.498724	0.208657
474	8.8555	90.2533	265.766	2.5625	31.9205	13.4362				0.155128	-0.835265	-0.720318	-0.251305	-0.580273	-0.462881	-0.449152	0.146548
477	9.6147	110.701	266.748	1.4062	33.0455	14.4039				0.25416	-0.797942	-0.719285	-0.589146	-0.56548	-0.424197	-0.473648	0.154858
480	7.051	102.591	288.225	1.675	31.6534	15.2989				-0.0802541	-0.812746	-0.696683	-0.510609	-0.583785	-0.388419	-0.512083	0.105101
483	6.7365	120.013	248.631	0.5813	29.5909	19.538				-0.121278	-0.780946	-0.738351	-0.83016	-0.610905	-0.218958	-0.5501	0.124419
486	8.1048	106.403	252.135	3.5062	54.5284	12.8772				0.0572056	-0.805788	-0.734663	0.0244187	-0.282998	-0.485227	-0.371175	0.150754
489	11.136	79.9675	226.685	1.9562	41.3636	16.2132				0.452601	-0.854039	-0.761446	-0.42845	-0.456104	-0.351869	-0.399885	0.188856
492	8.221	58.3571	239.523	0.1125	34.6477	16.6236				0.072363	-0.893484	-0.747936	-0.96713	-0.544412	-0.335463	-0.569344	0.159406
495	5.3881	64.3506	310.459	2.6437	38.9205	10.3651				-0.297166	-0.882544	-0.673284	-0.227581	-0.488229	-0.58565	-0.525742	0.0992001
498	9.8442	82.3636	326.036	0.4125	49.0227	12.5363				0.284096	-0.849666	-0.656892	-0.879478	-0.355394	-0.498855	-0.492698	0.175716
501	7.7649	74.0714	336.586	0.2062	41.7102	10.9952				0.0128684	-0.864801	-0.64579	-0.939754	-0.451547	-0.560461	-0.574914	0.139413
504	8.949	77.7662	350.649	1.1313	40.4432	10.8821				0.167325	-0.858057	-0.630991	-0.669464	-0.468207	-0.564982	-0.504063	0.144284
507	6.6232	96.3896	323.27	2	45.3125	13.8821				-0.136057	-0.824065	-0.659803	-0.415653	-0.404179	-0.445056	-0.480802	0.0966286
510	6.3428	60.0714	309.766	0.3688	47.1591	13.7221				-0.172633	-0.890354	-0.674014	-0.892246	-0.379898	-0.451452	-0.576766	0.119039
513	11.7989	66.9545	360.676	0	51.0739	13.1002				0.539071	-0.877791	-0.620439	-1	-0.328422	-0.476313	-0.460649	0.224173
516	10.8697	87.4026	275.784	0	66.5057	17.9919				0.417864	-0.840468	-0.709776	-1	-0.125507	-0.280765	-0.423109	0.216428
519	8.9632	91.8766	352.117	2.85	32.6591	13.4443				0.169177	-0.832302	-0.629446	-0.167306	-0.570561	-0.462557	-0.415499	0.147106
522	6.5467	84.0649	375.901	1.6187	42.7557	14.1874				-0.146036	-0.84656	-0.604416	-0.527059	-0.437799	-0.432851	-0.49912	0.0940572
525	5.745	67.9026	344.838	2.7687	48.9205	12.9225				-0.250611	-0.876061	-0.637106	-0.191059	-0.356737	-0.483416	-0.465832	0.105143
528	7.0368	74.3831	375.82	1.2	38.5682	10.9031				-0.0821064	-0.864232	-0.604502	-0.649392	-0.492861	-0.564143	-0.542873	0.105463
531	8.5326	80.0844	411.541	3.375	47.017	16.5977				0.113009	-0.853826	-0.566911	-0.0139144	-0.381767	-0.336498	-0.339985	0.144777
534	6.9943	59.2208	362.171	0.0125	38.7443	10.9305				-0.0876501	-0.891907	-0.618865	-0.996348	-0.490546	-0.563048	-0.608061	0.131417
537	8.6346	64.7208	339.541	0.2562	56.5398	14.8498				0.126314	-0.881868	-0.642681	-0.925145	-0.25655	-0.406372	-0.497717	0.164033
540	8.7875	71.3961	306.775	0	58.1534	12.7205				0.146258	-0.869684	-0.677162	-1	-0.235333	-0.491491	-0.521235	0.173505
543	8.3569	65.7922	428.541	2.5625	41.9318	18.0598				0.09009	-0.879913	-0.549021	-0.251305	-0.448633	-0.27805	-0.386139	0.13303
546	6.6657	66.1623	306.459	2.0062	42.358	12.4798				-0.130513	-0.879237	-0.677494	-0.413842	-0.443029	-0.501114	-0.507538	0.10363
549	8.5751	55.026	365.766	1.5875	34.6591	17.8174				0.118552	-0.899564	-0.615082	-0.536175	-0.544263	-0.28774	-0.460712	0.140779
552	5.5212	69.3636	320.126	2.3875	50.4091	16.0727				-0.279804	-0.873394	-0.663112	-0.302436	-0.337164	-0.357486	-0.468899	0.0990907
555	6.3994	54.2532	344.459	1.575	51.6932	15.5186				-0.16525	-0.900974	-0.637504	-0.539827	-0.320279	-0.379636	-0.490578	0.106393
558	14.1501	64.4481	275.144	2.1375	57.9205	14.874				0.845766	-0.882366	-0.710449	-0.375479	-0.238395	-0.405404	-0.294388	0.24771
561	11.7762	60.0584	317.45	2.7062	71.1761	13.4847				0.53611	-0.890378	-0.665928	-0.20932	-0.0640953	-0.460942	-0.292426	0.205829
564	8.9263	69.8377	296.838	2.2562	73.3693	18.2843				0.164364	-0.872529	-0.687619	-0.340798	-0.0352566	-0.269076	-0.340152	0.158819
567	6.3173	75.3896	281.414	7.1813	61.2045	16.6446				-0.175959	-0.862395	-0.70385	1.09819	-0.195213	-0.334624	-0.195643	0.282638
570	8.2493	77.9156	263.144	3.125	68.5455	14.0759				0.0760545	-0.857784	-0.723077	-0.0869578	-0.0986854	-0.437309	-0.354627	0.154747
573	5.4533	67.474	264.622	0.0938	75.9318	16.5396				-0.288661	-0.876843	-0.721523	-0.972594	-0.00156193	-0.338821	-0.533334	0.155654
576	5.238	75.4026	264.108	4.8125	69.4318	15.6817				-0.316745	-0.862371	-0.722063	0.406085	-0.0870314	-0.373116	-0.325874	0.186183
579	7.7252	69.7143	229.144	0.4563	80.0966	9.5751				0.00768986	-0.872754	-0.758858	-0.866681	0.0532016	-0.61723	-0.509105	0.174875
582	8.5836	77.0065	302.784	0	82.3523	12.6317				0.119661	-0.859444	-0.681362	-1	0.0828621	-0.495041	-0.472221	0.194182
585	3.4929	78.8831	237.577	0	83.7898	17.4152				-0.544379	-0.856018	-0.749984	-1	0.101764	-0.303818	-0.558739	0.16544
588	10.8867	80.9675	284.432	0.4125	79.6193	13.6898				0.420082	-0.852214	-0.700674	-0.879478	0.0469255	-0.452743	-0.403017	0.21601
591	9.9292	66.6494	245.775	1.6	94.2386	14.105				0.295184	-0.878348	-0.741356	-0.532522	0.239157	-0.436145	-0.342339	0.202983
594	5.3513	57.6753	259.387	2.3937	69.983	13.0662				-0.301966	-0.894728	-0.727031	-0.300624	-0.0797836	-0.477672	-0.463634	0.123216
597	8.6034	93.2922	286.73	5.2875	85.0966	16.1099				0.122244	-0.829718	-0.698257	0.544867	0.118947	-0.355998	-0.182986	0.218159
600	9.3173	72.3896	221.414	3.2812	93.3409	14.7221				0.215366	-0.867871	-0.766992	-0.0413203	0.227353	-0.411477	-0.274157	0.196604
603	8.3173	86	247.216	4.7875	84.0511	12.8449				0.0849245	-0.843028	-0.739839	0.398781	0.1052	-0.486519	-0.246747	0.208707
606	5.2323	110.5	256.892	1.6125	115.665	16.0016				-0.317489	-0.79831	-0.729657	-0.52887	0.520893	-0.360328	-0.36896	0.194472
609	6.2408	123.325	308.613	0.2375	122.296	14.8191				-0.185938	-0.774901	-0.675228	-0.930609	0.608081	-0.407599	-0.394366	0.228018
612	7.2918	108.364	303.18	0.1875	123.097	14.0162				-0.0488437	-0.802209	-0.680945	-0.945217	0.618615	-0.439695	-0.383049	0.237957
615	9.0425	97.987	275.586	1.3312	90.983	15.0582				0.179521	-0.821149	-0.709984	-0.611059	0.196348	-0.398041	-0.360727	0.182595
618	8.1558	105.825	320.054	3.25	105.733	17.874				0.0638581	-0.806843	-0.663188	-0.0504361	0.390298	-0.285478	-0.225298	0.184996
621	8.4363	104.195	288.703	0.025	97.2443	12.6607				0.100447	-0.809818	-0.69618	-0.992696	0.278679	-0.493882	-0.435575	0.209701
624	7.1926	102.838	327.928	0.9062	109.449	10.9548				-0.0617835	-0.812295	-0.654901	-0.735232	0.439159	-0.562076	-0.397855	0.199346
627	9.6459	152.766	297.892	1.6562	110.159	13.601				0.25823	-0.721163	-0.68651	-0.516102	0.448498	-0.456293	-0.27889	0.205515
630	8.2975	133.617	315.261	0	103.006	17.2488				0.0823418	-0.756115	-0.668231	-1	0.354437	-0.31047	-0.383006	0.213454
633	6.6204	161.649	276.369	1.3188	128.796	13.7351				-0.136422	-0.704949	-0.70916	-0.614682	0.69355	-0.450932	-0.320432	0.220952
636	7.3853	156.058	304.144	0.9187	115.375	14.6042				-0.0366473	-0.715154	-0.679931	-0.73158	0.517082	-0.41619	-0.343737	0.203467
639	7.1983	160.312	333.531	4.25	102.591	14.0889				-0.06104	-0.707391	-0.649004	0.241737	0.348982	-0.436789	-0.210584	0.185317
642	8.6431	171.11	341.775	1.15	109.881	14.9289				0.127422	-0.68768	-0.640329	-0.664	0.444837	-0.40321	-0.303827	0.195504
645	9.1955	201.675	334.306	3.1063	113.347	14.5509				0.199479	-0.631892	-0.648189	-0.0924214	0.490411	-0.41832	-0.183489	0.189847
648	11.9093	203.994	302.378	0.5063	104.051	14.9031				0.553472	-0.62766	-0.681789	-0.852073	0.368183	-0.404241	-0.274018	0.240805
651	7.5354	193.546	336.541	0	105.75	13.6979				-0.017068	-0.64673	-0.645838	-1	0.390522	-0.452419	-0.395256	0.204572
654	10.136	178.182	312.414	2.4	119.04	14.9467				0.322159	-0.674773	-0.671227	-0.298784	0.565271	-0.402498	-0.193309	0.212623
657	8.3229	183.143	310.784	2.5812	115.102	13.7221				0.085655	-0.665718	-0.672943	-0.245842	0.513497	-0.451452	-0.239467	0.190371
660	8.4164	194.123	323.387	0.3	129.278	15.21				0.0978513	-0.645676	-0.65968	-0.912348	0.6999	-0.391972	-0.301987	0.244292
663	5.6856	160.123	337.604	0.4187	128.631	12.433				-0.258359	-0.707734	-0.644719	-0.877667	0.691383	-0.502984	-0.383347	0.231148
666	8.5212	178.617	349.216	0.1375	134.807	17.5961				0.111522	-0.673979	-0.632498	-0.959826	0.772594	-0.296587	-0.279796	0.258403
669	7.0368	210.104	370.694	0.6625	106.284	12.8643				-0.0821064	-0.616507	-0.609896	-0.806435	0.397545	-0.485743	-0.367191	0.182039
672	9.2578	165.766	351.856	5.05	113.568	17.9015				0.207605	-0.697435	-0.629721	0.475476	0.493324	-0.284378	-0.0725213	0.219456
675	8.6742	233.097	395.495	0.725	107.165	15.8982				0.131479	-0.574538	-0.583796	-0.788174	0.409125	-0.364461	-0.295061	0.190374
678	9.0708	222.792	369.27	1.6812	114.216	12.4637				0.183212	-0.593348	-0.611394	-0.508798	0.501841	-0.501757	-0.255041	0.19422
681	12.5581	207.221	365.703	2.8688	113.841	15.1034				0.638103	-0.62177	-0.615149	-0.161813	0.49691	-0.396234	-0.109992	0.225809
684	6.7989	237.539	409.198	3.6562	99.9545	13.2439				-0.113138	-0.566431	-0.569376	0.0682448	0.314316	-0.470568	-0.222825	0.151086
687	7.881	207.305	406.072	2.3688	106.483	13.9305				0.0280127	-0.621616	-0.572665	-0.307899	0.40016	-0.443121	-0.252855	0.161535
690	4.7507	259.247	404.955	2.175	111.142	15.4507				-0.38031	-0.526809	-0.573841	-0.364523	0.461422	-0.38235	-0.294402	0.155285
693	3.7507	226.851	398.108	2.1312	103.324	15.4701				-0.510752	-0.58594	-0.581046	-0.37732	0.358621	-0.381575	-0.346335	0.145911
696	6.3343	238.422	388.441	0.775	144.682	14.2375				-0.173742	-0.564819	-0.591219	-0.773566	0.902442	-0.430849	-0.271959	0.248557
699	10.1501	245.221	418.081	0.2875	114.46	12.9903				0.323998	-0.55241	-0.560028	-0.916	0.505053	-0.480706	-0.280015	0.229385
702	11.1246	241.331	434.081	1.775	128.653	16.9144				0.451114	-0.559509	-0.54319	-0.481392	0.691682	-0.323838	-0.127522	0.225763
705	6.017	221.903	399.414	4.8562	109.227	15.8191				-0.215131	-0.594972	-0.579672	0.418853	0.436245	-0.367623	-0.150383	0.191616
708	4.9887	208.351	457.604	1.3813	127.136	18.2294				-0.349264	-0.619707	-0.518436	-0.596421	0.671735	-0.27127	-0.280561	0.198582
711	9.17	240.494	498.946	1.0562	117.062	13.042				0.196152	-0.561038	-0.474929	-0.691406	0.539272	-0.478639	-0.245098	0.201355
714	7.4816	236.104	421.955	2.8625	124.562	12.4103				-0.0240858	-0.569051	-0.555951	-0.163653	0.63789	-0.503892	-0.196457	0.190569
717	11.3173	247.597	487.495	0	124.284	12.3845				0.47625	-0.548072	-0.486979	-1	0.634229	-0.504923	-0.238249	0.263373
720	8.9405	244.325	454.441	1.4813	113.739	15.4265				0.166216	-0.554046	-0.521764	-0.567203	0.495565	-0.383318	-0.227425	0.183552
723	7.4504	265.195	449.297	1.7062	111.943	16.9758				-0.0281556	-0.515952	-0.527177	-0.501494	0.471957	-0.321384	-0.237034	0.161795
726	4.3654	243.325	434.712	0.4313	116.148	11.8191				-0.430569	-0.555871	-0.542526	-0.873986	0.527243	-0.527525	-0.400539	0.195469
729	6.3739	220.513	414.414	0.3375	140.699	14.8304				-0.168576	-0.597508	-0.563886	-0.901391	0.85007	-0.407147	-0.298073	0.249747
732	6.847	260.058	485.676	2.5375	145.767	14.8675				-0.106864	-0.525328	-0.488894	-0.25861	0.916711	-0.405664	-0.144775	0.221544
735	9.3399	243.662	479.676	3.4	119.881	14.1357				0.218314	-0.555255	-0.495208	-0.00661008	0.576328	-0.434918	-0.116225	0.186324
738	7.6686	301.305	480.946	4.8875	140.403	12.8271				0.000306849	-0.450042	-0.493871	0.427998	0.846184	-0.48723	-0.026109	0.229417
741	11.0198	256.409	506.261	0	149.574	14.063				0.437444	-0.531988	-0.46723	-1	0.966769	-0.437824	-0.172138	0.296716
744	12.8074	268.507	454.234	0.1	151.165	13.4297				0.670622	-0.509908	-0.521982	-0.970783	0.987688	-0.463141	-0.134584	0.316542
747	9.5977	258.033	491.631	0.6938	157.023	14.9806				0.251942	-0.529025	-0.482627	-0.79729	1.06471	-0.401143	-0.148905	0.281273
750	6.9292	211.084	456.396	2.0938	154.858	15.8013				-0.0961419	-0.614718	-0.519706	-0.388247	1.03625	-0.368335	-0.158483	0.249448
753	7.915	240.656	451.64	1.55	165.176	14.0469				0.0324477	-0.560742	-0.524712	-0.547131	1.17192	-0.438468	-0.144447	0.278725
756	10.3768	257.071	462.342	4.0375	189.807	15.2601				0.35357	-0.53078	-0.513449	0.179651	1.4958	-0.38997	0.0991364	0.317971
759	7.1161	244.344	457.919	1.4625	188.091	14.273				-0.0717623	-0.55401	-0.518104	-0.572696	1.47323	-0.42943	-0.112128	0.32598
762	4.6686	204.5	452.189	4.2937	213.312	20.1325				-0.391019	-0.626736	-0.524134	0.254505	1.80488	-0.195193	0.0537168	0.372539
765	6.6317	242.312	480.009	3.375	189.307	20.8611				-0.134948	-0.55772	-0.494857	-0.0139144	1.48922	-0.166067	0.0202859	0.306444
768	9.6516	269.416	466.73	0	198.017	14.6575				0.258973	-0.508248	-0.508832	-1	1.60375	-0.414059	-0.0947353	0.377444
771	6.6006	271.091	519.622	5.1438	204.71	12.6317				-0.139005	-0.50519	-0.45317	0.502882	1.69176	-0.495041	0.100373	0.35494
774	8.1275	250.318	473.162	2.3937	197.193	14.9725				0.0601666	-0.543106	-0.502062	-0.300624	1.59292	-0.401467	-0.0156952	0.333573
777	7.898	240.26	455.027	1.9062	186.597	19.3296				0.0302302	-0.561465	-0.521147	-0.443059	1.45359	-0.227289	-0.0448575	0.312866
780	7.0907	259.565	469.486	6.1062	169.46	14.2278				-0.0750755	-0.526228	-0.505931	0.78407	1.22826	-0.431236	0.0789759	0.306074
783	5.7989	256.344	529.162	3.1437	162.102	14.2908				-0.24358	-0.532107	-0.44313	-0.0814941	1.13151	-0.428718	-0.0995873	0.254956
786	8.0113	264.5	451.171	0.2062	173.046	16.378				0.0450093	-0.517221	-0.525205	-0.939754	1.2754	-0.345281	-0.167842	0.31651
789	11.9575	275.487	503.469	1.95	184.75	20.168				0.559759	-0.497166	-0.470169	-0.430262	1.4293	-0.193774	0.066282	0.317321
792	5.745	251	496.613	0.3187	201.079	19.0565				-0.250611	-0.541861	-0.477384	-0.906884	1.64402	-0.238207	-0.128487	0.368205
795	3.4079	235.584	463.865	0.0688	201.074	13.8045				-0.555467	-0.569999	-0.511847	-0.979898	1.64395	-0.448158	-0.236903	0.38394
798	5.711	252.312	434.631	1.3625	183.097	13.7577				-0.255046	-0.539467	-0.542612	-0.601914	1.40756	-0.450029	-0.163584	0.31812
801	7.5411	221.734	452.396	2.6063	153.994	13.9693				-0.0163245	-0.59528	-0.523916	-0.238508	1.02489	-0.44157	-0.131784	0.246792
804	7.9632	250.708	427.027	0.2375	201.733	15.8691				0.038735	-0.542395	-0.550613	-0.930609	1.65262	-0.365625	-0.116315	0.376322
807	8.5694	271.967	465.667	0.6625	177.051	16.0436				0.117809	-0.50359	-0.50995	-0.806435	1.32807	-0.358649	-0.122124	0.315213
810	5.8952	223.844	381.55	1.0125	179.199	13.546				-0.231019	-0.591428	-0.598472	-0.704174	1.35631	-0.458492	-0.204545	0.319163
813	4.9802	240.208	398.478	2.4125	170.261	13.6769				-0.350373	-0.56156	-0.580658	-0.295131	1.23879	-0.453259	-0.167032	0.284899
816	5.8867	233.026	424.901	1.2062	198.364	15.4863				-0.232128	-0.574669	-0.552851	-0.64758	1.60831	-0.380927	-0.129974	0.35306
819	10.1275	238.026	421.577	0.05	181.074	12.546				0.32105	-0.565542	-0.556349	-0.985391	1.38097	-0.498467	-0.150622	0.352271
822	6.4136	247.149	421.541	0	172.568	14.8061				-0.163398	-0.54889	-0.556387	-1	1.26912	-0.408119	-0.234612	0.320652
825	6.1388	210.786	434.063	2.8375	164.483	14.2827				-0.199243	-0.615263	-0.543209	-0.170958	1.16281	-0.429042	-0.132484	0.269162
828	6.983	246.338	431.243	0.4688	169.449	13.6769				-0.0891241	-0.550371	-0.546176	-0.863029	1.22811	-0.453259	-0.212309	0.305353
831	7.0142	252.786	436.09	2.525	204.261	14.5961				-0.0850543	-0.538602	-0.541076	-0.262262	1.68586	-0.416513	-0.0262742	0.349778
834	8.7819	200.429	458.469	2.0687	198.222	16.8368				0.145528	-0.634167	-0.517526	-0.395581	1.60644	-0.32694	-0.0203736	0.343158
837	5.5694	246.844	471.126	1.05	161.994	18.6268				-0.273517	-0.549447	-0.504205	-0.693218	1.13009	-0.255384	-0.190947	0.272949
840	10.6459	247.526	407.054	1.4312	167.898	15.0759				0.388672	-0.548202	-0.571632	-0.581841	1.20771	-0.397333	-0.0837711	0.299512

## Sheet: H
	CCHa2-GC6m50mM glucose-1.tif	CCHa2-GC6m 50mM glucose001-1.tif	CCHa2-GC6m 50mM glucose002-1.tif	CCHa2-GC6m 50mM glucose004-1.tif	CCHa2-GC6m 50mM glucose005-1.tif	CCHa2-GC6m 50mM glucose006-1.tif					CCHa2-GC6m50mM glucose-1.tif	CCHa2-GC6m 50mM glucose001-1.tif	CCHa2-GC6m 50mM glucose002-1.tif	CCHa2-GC6m 50mM glucose004-1.tif	CCHa2-GC6m 50mM glucose005-1.tif	CCHa2-GC6m 50mM glucose006-1.tif
time（sec）	Mean1	Mean1	Mean1	Mean1	Mean1	Mean1					F/F0	F/F0	F/F0	F/F0	F/F0	F/F0	mean	SEM
0	22.9865	24.8618	21.1354	15.2731	18.673	25.3594					0.194584	0.105636	0.0269311	0.208721	-0.0073683	0.195364	0.120645	0.038385
3	19.2406	24.6019	21.1417	13.1412	22.9392	21.703					-8.63674e-05	0.0940782	0.0272372	0.040001	0.219417	0.0230127	0.0672766	0.0330198
6	18.475	24.5937	20.9651	13.1662	22.1916	24.5658					-0.0398738	0.0937135	0.0186565	0.0419795	0.179676	0.157956	0.0753513	0.0344718
9	18.9458	25.1806	22.7948	13.7863	19.654	21.4938					-0.0154068	0.119814	0.107558	0.0910545	0.0447804	0.0131517	0.0601586	0.0222982
12	16.1635	27.8016	17.624	14.1003	20.0942	23.8539					-0.16	0.236373	-0.143682	0.115905	0.0681808	0.1244	0.0401961	0.0648023
15	21.4021	26.8605	18.4141	11.5686	19.9091	22.4547					0.112245	0.194521	-0.105292	-0.0844553	0.0583411	0.0584455	0.0389675	0.0470337
18	20.3146	23.3625	19.9937	14.1332	20.7999	20.751					0.0557283	0.0389604	-0.0285421	0.118508	0.105695	-0.0218617	0.044748	0.0252438
21	16.7938	24.1505	19.7979	14.9248	17.8025	18.5377					-0.127244	0.0740038	-0.0380557	0.181156	-0.0536429	-0.12619	-0.0149954	0.0494589
24	13.8479	23.2462	20.9901	10.4182	18.3944	21.7846					-0.280339	0.0337884	0.0198712	-0.175499	-0.0221783	0.0268591	-0.0662496	0.0534807
27	19.9885	22.7264	19.0896	10.7876	19.0451	21.7826					0.0387812	0.0106723	-0.0724707	-0.146264	0.012412	0.0267648	-0.0216841	0.0296155
30	22.1115	18.3051	20.8026	11.7863	17.8954	19.8374					0.149111	-0.185949	0.0107609	-0.0672265	-0.0487045	-0.064926	-0.0344889	0.0450544
33	21.2635	21.3858	20.425	12.8826	18.8391	22.4321					0.105042	-0.0489459	-0.00758601	0.0195353	0.00146136	0.0573802	0.0211478	0.0219696
36	22.149	23.6306	22.7078	11.0726	20.1046	17.6776					0.15106	0.0508832	0.103331	-0.123709	0.0687336	-0.166732	0.0139278	0.0525197
39	19.7844	19.9713	20.2969	12.9208	19.4925	18.9835					0.0281743	-0.111851	-0.0138102	0.0225584	0.0361952	-0.105176	-0.0239848	0.0276432
42	17.8635	22.3311	21.337	12.2018	18.172	22.4712					-0.0716528	-0.00690724	0.0367264	-0.0343436	-0.0340008	0.0592233	-0.00849245	0.0199507
45	18.9	17.8741	17.5578	13.2929	15.6906	20.561					-0.017787	-0.205116	-0.146898	0.0520066	-0.165909	-0.0308177	-0.0857534	0.0412416
48	19.7656	15.3858	21.001	13.4815	17.7384	20.6824					0.0271973	-0.315774	0.0204008	0.0669325	-0.0570504	-0.0250953	-0.0472314	0.0565239
51	22.4698	17.2572	21.9979	10.5303	18.0844	19.2593					0.167732	-0.23255	0.0688384	-0.166627	-0.0386575	-0.0921758	-0.0489067	0.060651
54	17.8823	18.0397	21.2563	12.2546	16.9274	21.5336					-0.0706758	-0.197751	0.0328054	-0.030165	-0.100162	0.0150277	-0.0584868	0.0345547
57	17.3219	23.3297	20.6693	14.9578	16.6566	19.6701					-0.0997992	0.0375018	0.00428409	0.183768	-0.114557	-0.072812	-0.0102692	0.0458066
60	16.4177	27.3187	22.2057	8.6702	15.9398	20.1159					-0.146789	0.214898	0.078935	-0.313836	-0.152662	-0.0517983	-0.0618755	0.0764786
63	20.4365	22.1436	19.6536	8.5	16.9104	20.3525					0.0620633	-0.0152456	-0.0450669	-0.327306	-0.101066	-0.0406457	-0.0778778	0.0543817
66	16.9562	22.4391	22.0073	9.7137	15.775	18.0974					-0.118804	-0.00210434	0.0692951	-0.231253	-0.161422	-0.146944	-0.0985388	0.0453832
69	17.8563	16.1669	18.4458	12.3852	17.3905	19.1866					-0.072027	-0.281037	-0.103752	-0.0198292	-0.0755443	-0.0956027	-0.107965	0.036622
72	17.3385	20.2914	26.3068	12.7243	18.1609	18.9829					-0.0989365	-0.0976153	0.2782	0.00700733	-0.0345908	-0.105204	-0.00852329	0.0601637
75	16.3635	15.275	21.3469	11.5594	12.4683	18.0782					-0.149606	-0.320701	0.0372075	-0.0851834	-0.337202	-0.147849	-0.167222	0.0582112
78	14.6854	21.7319	19.0542	11.4683	12.2178	17.7476					-0.236815	-0.0335544	-0.0741907	-0.0923931	-0.350518	-0.163433	-0.158484	0.0483453
81	17.9344	17.7907	19.7542	13.777	13.0052	20.0048					-0.0679682	-0.208825	-0.040179	0.0903185	-0.308661	-0.0570352	-0.0987249	0.0571676
84	18.1646	15.948	20.5151	14.0383	12.7508	18.0823					-0.0560049	-0.290772	-0.00320821	0.110998	-0.322185	-0.147656	-0.118138	0.0687705
87	14.8635	18.3967	20.474	11.1042	9.6972	17.9451					-0.22756	-0.181875	-0.00520518	-0.121208	-0.48451	-0.154123	-0.195747	0.0653665
90	15.0865	16.4487	19.2911	12.5765	12.6161	19.8093					-0.215971	-0.268505	-0.0626802	-0.00468964	-0.329345	-0.0662505	-0.157907	0.0535222
93	14.4021	17.2339	15.9417	9.3971	12.0209	18.9671					-0.251538	-0.233586	-0.225421	-0.256309	-0.360985	-0.105949	-0.238965	0.0332933
96	16.0312	13.9289	18.6667	12.9974	10.1543	16.8903					-0.166875	-0.380564	-0.0930186	0.0286206	-0.460211	-0.203843	-0.212649	0.0739769
99	13.299	16.3926	16.6307	14.2071	8.1714	18.4959					-0.308865	-0.271	-0.191944	0.124357	-0.565619	-0.12816	-0.223539	0.0926785
102	13.1729	14.2927	18.6562	12.6887	9.5114	18.8045					-0.315418	-0.364385	-0.0935288	0.00418992	-0.494387	-0.113614	-0.229524	0.0779465
105	15.974	17.4501	15.7151	9.6266	9.964	17.5645					-0.169848	-0.223972	-0.236432	-0.238146	-0.470327	-0.172063	-0.251798	0.0454698
108	12.3042	18.1505	16.099	9.6834	10.8555	18.7284					-0.360564	-0.192824	-0.217779	-0.233651	-0.422936	-0.117201	-0.257492	0.0461897
111	12.4979	10.0492	16.5734	12.0396	8.7253	20.0542					-0.350497	-0.553099	-0.194728	-0.0471802	-0.536175	-0.0547067	-0.289398	0.092535
114	10.6198	14.3653	16.3599	13.0066	8.8927	17.7298					-0.4481	-0.361157	-0.205102	0.0293487	-0.527276	-0.164272	-0.279426	0.0838027
117	9.9604	12.4747	14.8984	12.1135	8.3748	16.6488					-0.482369	-0.445234	-0.276114	-0.0413317	-0.554807	-0.215227	-0.335847	0.0787896
120	12.576	13.9494	15.4536	11.7718	8.4362	18.9568					-0.346439	-0.379652	-0.249137	-0.068374	-0.551543	-0.106435	-0.283597	0.0739066
123	10.6021	15.6443	15.9661	10.1887	10.1629	16.607					-0.44902	-0.304278	-0.224236	-0.193661	-0.459754	-0.217197	-0.308024	0.048739
126	12.2677	12.8782	13.5146	12.8404	11.5285	14.9506					-0.362461	-0.42729	-0.34335	0.0161955	-0.38716	-0.295275	-0.29989	0.0657222
129	12.7208	13.3447	18.6536	13.0818	6.8103	16.8326					-0.338913	-0.406544	-0.0936551	0.0353	-0.637974	-0.206563	-0.274725	0.0978083
132	11.8479	15.3762	15.2969	13.2691	8.8914	16.513					-0.384277	-0.316201	-0.256751	0.0501231	-0.527345	-0.221628	-0.276013	0.0787819
135	9.0781	12.7852	15.7208	10.3259	8.4075	16.8429					-0.528221	-0.431426	-0.236155	-0.182803	-0.553069	-0.206077	-0.356292	0.0685617
138	12.2271	15.119	17.6745	8.2507	7.4774	18.6749					-0.364571	-0.327639	-0.141228	-0.347036	-0.602511	-0.119723	-0.317118	0.0717888
141	10.9906	15.8796	16.8661	11.5726	7.9791	16.3121					-0.42883	-0.293814	-0.180507	-0.0841388	-0.575842	-0.231098	-0.299038	0.07265
144	10.5208	16.5349	18.1979	8.0515	8.6514	17.0727					-0.453245	-0.264672	-0.115797	-0.3628	-0.540103	-0.195245	-0.321977	0.0654044
147	12.3531	13.2955	17.3635	10.7018	8.7822	14.4053					-0.358022	-0.408732	-0.156339	-0.153054	-0.53315	-0.320978	-0.321713	0.0603852
150	11.1156	15.1368	15.312	11.4077	7.465	14.072					-0.422334	-0.326847	-0.256017	-0.097189	-0.603171	-0.336689	-0.340375	0.0688552
153	10.6635	13.2585	19.451	12.8839	7.5625	15.7428					-0.445829	-0.410377	-0.0549109	0.0196381	-0.597988	-0.257933	-0.291233	0.0976032
156	12.8313	14.974	17.475	12.314	7.6488	15.6077					-0.333171	-0.334087	-0.150921	-0.025464	-0.5934	-0.264301	-0.283557	0.0786538
159	13.149	11.5267	15.174	10.3602	7.2256	12.3285					-0.31666	-0.487393	-0.262723	-0.180089	-0.615897	-0.418872	-0.380272	0.0649157
162	8.6073	14.9425	17.3698	10.6412	9.1589	14.6056					-0.552688	-0.335488	-0.156033	-0.15785	-0.513125	-0.311537	-0.337787	0.0690488
165	10.5167	16.4966	17.2719	11.3971	8.0209	16.1001					-0.453458	-0.266375	-0.160789	-0.0980279	-0.57362	-0.241091	-0.298894	0.0737525
168	9.9896	13.3256	16.5896	11.6504	9.3564	14.5857					-0.480851	-0.407393	-0.193941	-0.0779816	-0.502626	-0.312475	-0.329211	0.068526
171	12.1938	11.7715	14.5417	12.876	10.2112	14.9678					-0.366301	-0.476506	-0.293445	0.0190129	-0.457186	-0.294464	-0.311482	0.073328
174	9.724	14.9439	16.8797	13.2098	9.0647	14.1324					-0.494654	-0.335426	-0.179846	0.04543	-0.518133	-0.333842	-0.302745	0.085943
177	10.2146	12.1026	17.2641	14.1161	9.9163	17.9417					-0.469158	-0.461782	-0.161168	0.117155	-0.472863	-0.154283	-0.267017	0.0987704
180	11.7906	14.632	16.5307	12.5251	10.3584	13.6289					-0.387255	-0.349296	-0.196803	-0.00875746	-0.449361	-0.357576	-0.291508	0.0660067
183	9.8885	16.6498	18.2849	11.566	10.0536	16.7538					-0.486105	-0.259562	-0.11157	-0.0846611	-0.465564	-0.210277	-0.269623	0.0702548
186	11.0469	16.4815	17.4438	13.8654	10.7319	14.2654					-0.425904	-0.267046	-0.152437	0.0973145	-0.429507	-0.327573	-0.250859	0.0815709
189	11.2844	17.1915	15.8833	8.6003	9.8934	13.2997					-0.413562	-0.235472	-0.228259	-0.319368	-0.47408	-0.373093	-0.340639	0.0401328
192	10.524	14.8276	18.412	10.7296	9.4774	14.2058					-0.453079	-0.340598	-0.105394	-0.150854	-0.496194	-0.330382	-0.31275	0.0641968
195	10.6052	15.3311	17.6464	11.7586	10.1295	14.987					-0.448859	-0.318206	-0.142593	-0.0694186	-0.461529	-0.293559	-0.289028	0.0647678
198	14.3854	16.9685	17.2573	12.5079	10.4585	16.6283					-0.252406	-0.245389	-0.161499	-0.0101187	-0.44404	-0.216193	-0.221608	0.0575501
201	11.2708	18.1778	13.9594	13.8259	12.0222	15.9239					-0.414268	-0.19161	-0.321738	0.0941885	-0.360916	-0.249396	-0.240623	0.0743372
204	12.5344	14.8263	17.5068	11.1201	8.535	15.9664					-0.3486	-0.340655	-0.149376	-0.11995	-0.546291	-0.247393	-0.292044	0.0638142
207	13.2177	16.0876	16.5547	12.5383	12.155	16.0343					-0.31309	-0.284564	-0.195637	-0.00771281	-0.353856	-0.244192	-0.233175	0.0503173
210	12.8365	17.2421	15.8844	10.029	10.9758	15.334					-0.332901	-0.233222	-0.228206	-0.2063	-0.416541	-0.277202	-0.282395	0.0325156
213	13.7	15.8372	15.4479	10.3826	14.3833	13.2963					-0.288025	-0.295699	-0.249414	-0.178316	-0.235403	-0.373253	-0.270019	0.0268783
216	11.9531	13.5185	13.4495	10.128	10.0733	12.4369					-0.37881	-0.398815	-0.346513	-0.198465	-0.464517	-0.413763	-0.366814	0.0372699
219	10.7146	18.2066	15.1661	10.9063	13.0726	15.677					-0.443174	-0.190329	-0.263106	-0.13687	-0.305078	-0.261034	-0.266599	0.0429531
222	10.5604	19.4268	16.5568	11.7164	9.1458	13.273					-0.451187	-0.136065	-0.195535	-0.0727584	-0.513822	-0.374352	-0.29062	0.073712
225	8.5198	21.8509	16.9813	10.942	10.8215	12.1776					-0.557235	-0.0282624	-0.174909	-0.134045	-0.424744	-0.425985	-0.290863	0.0844852
228	12.6302	15.6594	15.7083	9.562	13.0392	13.1207					-0.343622	-0.303606	-0.236762	-0.243259	-0.306854	-0.381531	-0.302605	0.0229405
231	12.5219	21.1313	16.599	10.0132	11.9411	13.7565					-0.34925	-0.0602639	-0.193484	-0.20755	-0.365227	-0.351561	-0.254556	0.0497707
234	10.399	19.4596	16.2443	11.4248	10.2446	13.1351					-0.459575	-0.134607	-0.210719	-0.0958357	-0.455411	-0.380852	-0.2895	0.0664583
237	11.4042	19.9658	18.2286	8.3153	11.7829	14.0391					-0.407336	-0.112095	-0.114305	-0.341923	-0.373637	-0.33824	-0.281256	0.0541128
240	11.7625	17.5759	14.8635	10.6174	11.9261	15.1049					-0.388715	-0.218377	-0.277809	-0.159734	-0.366024	-0.288001	-0.28311	0.0353513
243	13.426	16.6689	16.7464	11.777	12.0177	13.6824					-0.302265	-0.258713	-0.186323	-0.0679625	-0.361155	-0.355054	-0.255245	0.0459081
246	11.7812	22.2955	18.6083	7.8734	11.8005	14.9588					-0.387743	-0.00849042	-0.0958562	-0.376895	-0.372701	-0.294888	-0.256096	0.0668357
249	11.5917	20.4952	15.3089	9.0871	10.7273	13.6934					-0.397592	-0.0885521	-0.256168	-0.280842	-0.429751	-0.354535	-0.30124	0.050439
252	10.725	28.4856	18.6505	11.434	10.7731	14.1852					-0.442633	0.266791	-0.0938058	-0.0951076	-0.427316	-0.331353	-0.187237	0.110603
255	11.6365	23.6115	17.8839	9.3193	10.5278	13.2407					-0.395263	0.0500338	-0.131053	-0.262466	-0.440356	-0.375874	-0.259163	0.0768118
258	11.7031	22.9617	18.9859	11.4894	12.5278	13.9102					-0.391802	0.0211364	-0.0775093	-0.0907233	-0.334039	-0.344316	-0.202876	0.0710349
261	12.4906	22.7948	18.4828	9.8694	11.4559	14.0014					-0.350877	0.0137141	-0.101954	-0.218931	-0.39102	-0.340017	-0.231514	0.0654582
264	11.1521	22.1696	17.1448	11.6425	14.8954	13.7311					-0.420437	-0.0140894	-0.166965	-0.0786069	-0.20818	-0.352758	-0.20684	0.0637977
267	13.3438	20.8755	16.95	10.8707	12.9163	12.3086					-0.306537	-0.0716396	-0.17643	-0.139687	-0.313387	-0.41981	-0.237915	0.0530935
270	12.7729	22.6375	18.1292	10.223	11.3205	12.4609					-0.336206	0.00671876	-0.119135	-0.190947	-0.398217	-0.412631	-0.241736	0.0687887
273	12.501	21.2627	16.4833	9.9749	12.86	10.8045					-0.350336	-0.0544204	-0.199106	-0.210582	-0.31638	-0.490709	-0.270255	0.0611959
276	11.5125	22.4364	19.7458	8.2282	9.7842	14.9143					-0.401708	-0.00222441	-0.0405871	-0.348816	-0.479885	-0.296986	-0.261701	0.0800541
279	16.3219	23.643	19.6865	12.5541	12.3139	15.7716					-0.151768	0.0514346	-0.0434684	-0.00646239	-0.34541	-0.256575	-0.125375	0.062832
282	11.7375	27.2859	15.337	9.1174	12.015	16.3978					-0.390015	0.213439	-0.254803	-0.278445	-0.361299	-0.227058	-0.216363	0.0896915
285	13.6448	25.3995	18.5542	9.4697	12.1504	11.2894					-0.290894	0.129548	-0.0984848	-0.250563	-0.354101	-0.467852	-0.222058	0.0860811
288	13.15	22.9453	20.6797	8.1609	12.2054	12.3141					-0.316608	0.020407	0.00478941	-0.354142	-0.351177	-0.419551	-0.236047	0.0798199
291	11.476	25.7469	18.7818	11.4354	10.3008	13.3759					-0.403604	0.144998	-0.0874261	-0.0949969	-0.452423	-0.369501	-0.210492	0.0959104
294	15.2167	27.4118	20.4609	9.1359	12.0484	11.9588					-0.209204	0.219038	-0.00584169	-0.27698	-0.359523	-0.436299	-0.178135	0.0996188
297	11.8094	24.368	19.962	10.9908	10.6547	11.1008					-0.386278	0.0836763	-0.0300823	-0.130183	-0.43361	-0.476742	-0.22887	0.0957562
300	11.2344	25.974	20.2089	10.9894	10.9686	11.6701					-0.41616	0.155097	-0.0180859	-0.130294	-0.416924	-0.449907	-0.212712	0.103168
303	11.4875	27.7141	19.5453	8.157	11.4657	12.0789					-0.403007	0.232482	-0.050329	-0.354451	-0.390499	-0.430638	-0.23274	0.109173
306	13.7927	29.0657	18.7792	10.3298	10.9902	12.0508					-0.283208	0.292589	-0.0875525	-0.182495	-0.415776	-0.431962	-0.184734	0.10977
309	17.1635	28.5185	19.2974	9.7942	10.5121	12.2737					-0.108031	0.268254	-0.0623741	-0.224882	-0.441191	-0.421456	-0.164947	0.107568
312	13.7385	27.0205	19.5875	8.2942	11.0824	12.8217					-0.286025	0.201636	-0.0482786	-0.343593	-0.410874	-0.395624	-0.213793	0.0989858
315	14.2031	30.8057	18.7646	6.909	12.5435	10.7647					-0.26188	0.369969	-0.0882619	-0.453218	-0.333204	-0.492585	-0.209863	0.130136
318	13.9219	30.0561	18.1469	10.8351	14.3434	11.2078					-0.276494	0.336633	-0.118275	-0.142505	-0.237524	-0.471699	-0.151644	0.110304
321	15.0729	28.1943	18.6125	8.2942	9.7377	12.1324					-0.216677	0.253837	-0.0956521	-0.343593	-0.482357	-0.428116	-0.21876	0.110665
324	11.0417	27.4323	18.0833	9.1464	11.5114	11.4554					-0.426175	0.21995	-0.121365	-0.276149	-0.388069	-0.460028	-0.241973	0.105184
327	12.0479	32.2681	19.1276	12.405	12.6906	10.5123					-0.373883	0.435004	-0.0706243	-0.0182622	-0.325385	-0.504482	-0.142939	0.138097
330	12.8073	31.4378	18.812	8.81	13.1406	12.7037					-0.334418	0.398079	-0.0859588	-0.302772	-0.301463	-0.401187	-0.171287	0.121814
333	11.7198	33.2969	18.0734	12.4182	12.6037	13.3669					-0.390934	0.480756	-0.121846	-0.0172176	-0.330004	-0.369925	-0.124862	0.135561
336	12.8646	29.4856	19.1651	8.7678	12.1969	13.0274					-0.33144	0.311263	-0.0688023	-0.306112	-0.351629	-0.385928	-0.188775	0.110143
339	13.224	27.8482	18.9161	10.5369	10.7999	13.1207					-0.312763	0.238445	-0.0809007	-0.166105	-0.425892	-0.381531	-0.188124	0.100568
342	13.0052	31.6101	17.9432	8.8602	13.0242	11.4095					-0.324134	0.405742	-0.128172	-0.298799	-0.307651	-0.462191	-0.185868	0.126014
345	13.0792	36.2955	19.7005	9.405	14.399	10.1632					-0.320288	0.614108	-0.0427882	-0.255684	-0.234568	-0.520938	-0.126693	0.160936
348	12.4125	35.264	20.2687	6.6781	12.1602	11.3875					-0.354936	0.568235	-0.0151803	-0.471492	-0.35358	-0.463228	-0.181697	0.164613
351	12.3406	35.2886	20.3036	9.1253	9.2322	12.4129					-0.358672	0.569329	-0.0134846	-0.277819	-0.509229	-0.414894	-0.167462	0.162618
354	8.826	39.2695	24.0359	7.2335	11.0929	8.6632					-0.541322	0.746365	0.167861	-0.427537	-0.410316	-0.591643	-0.176099	0.215514
357	10.4865	36.3242	20.8818	7.3997	10.864	8.8608					-0.455028	0.615384	0.0146091	-0.414384	-0.422484	-0.582329	-0.207372	0.184143
360	12.6135	26.6717	19.1344	7.1029	10.894	11.3388					-0.34449	0.186125	-0.0702939	-0.437873	-0.42089	-0.465524	-0.258824	0.106757
363	11.8313	32.8317	20.5286	7.9591	10.6586	8.8628					-0.38514	0.460068	-0.00255227	-0.370113	-0.433403	-0.582235	-0.218896	0.156666
366	13.225	33.4296	18.9036	10.8971	12.0065	10.2503					-0.312711	0.486657	-0.0815081	-0.137598	-0.361751	-0.516832	-0.153957	0.14329
369	15.6552	29.2339	22.4458	8.471	9.9372	14.1571					-0.186416	0.300069	0.090601	-0.329601	-0.471752	-0.332678	-0.154963	0.119831
372	10.9698	27.5089	20.087	10.9459	12.2446	11.4287					-0.429911	0.223356	-0.0240088	-0.133736	-0.349093	-0.461286	-0.19578	0.109216
375	11.1115	28.0342	20.9219	7.4789	9.8777	11.692					-0.422547	0.246717	0.0165575	-0.408116	-0.474915	-0.448875	-0.24853	0.124188
378	12.2437	32.7442	20.7385	9.8602	12.0935	12.5597					-0.363708	0.456177	0.00764639	-0.219659	-0.357126	-0.407974	-0.147441	0.135676
381	10.3698	24.487	20.7958	7.9578	12.1354	12.559					-0.461092	0.0889684	0.0104305	-0.370216	-0.354898	-0.408007	-0.249136	0.0962117
384	11.6802	25.5964	17.6557	7.5013	9.3545	12.0055					-0.392992	0.138305	-0.142141	-0.406343	-0.502727	-0.434098	-0.29	0.0992417
387	12.0615	24.9425	18.3411	8.442	11.2557	11.9444					-0.373177	0.109225	-0.108839	-0.331896	-0.401662	-0.436978	-0.257221	0.0872731
390	13.3156	29.1888	20.5365	8.7216	10.2158	10.7503					-0.308002	0.298064	-0.00216842	-0.309768	-0.456942	-0.493264	-0.212014	0.124107
393	12.8385	27.606	19.9177	10.31	10.896	10.6879					-0.332797	0.227674	-0.0322348	-0.184062	-0.420783	-0.496205	-0.206401	0.110329
396	13.125	27.7319	18.6469	10.6346	10.2302	8.9911					-0.317908	0.233273	-0.0939807	-0.158373	-0.456176	-0.576187	-0.228225	0.117893
399	13.9854	30.4856	17.5026	7.7296	11.8424	11.0974					-0.273194	0.355734	-0.14958	-0.388276	-0.370474	-0.476903	-0.217115	0.123311
402	12.5604	24.6471	19.2802	10.9736	10.4264	10.5658					-0.347249	0.0960883	-0.0632098	-0.131544	-0.445747	-0.501961	-0.23227	0.096276
405	10.8188	26.2107	17.9323	11.6359	9.877	13.1454					-0.437758	0.165624	-0.128702	-0.0791292	-0.474952	-0.380366	-0.222547	0.102467
408	10.7396	27.5773	20.5464	9.752	10.1504	10.168					-0.441874	0.226398	-0.0016874	-0.228222	-0.460418	-0.520712	-0.237753	0.121458
411	12.3875	21.7934	20.4828	14.343	8.5782	11.4781					-0.356235	-0.0308194	-0.00477761	0.135112	-0.543994	-0.458958	-0.209945	0.11376
414	14.3385	25.1464	18.4891	12.2612	11.0334	10.1475					-0.254843	0.118293	-0.101648	-0.0296426	-0.413479	-0.521678	-0.2005	0.098668
417	11.9115	25.8523	18.7932	12.2401	10.0307	10.5103					-0.380972	0.149685	-0.0868722	-0.0313125	-0.466781	-0.504577	-0.220138	0.109208
420	11.2594	24.5157	18.3594	13.6069	10.2786	11.1152					-0.414861	0.0902447	-0.10795	0.0768567	-0.453603	-0.476064	-0.214229	0.108757
423	13.3635	23.5855	18.2687	9.0409	11.465	13.8477					-0.305513	0.0488775	-0.112357	-0.284499	-0.390536	-0.347262	-0.231881	0.0682607
426	12.3219	22.9138	17.5208	7.8879	8.0026	10.3224					-0.359644	0.0190062	-0.148696	-0.375748	-0.574592	-0.513434	-0.325518	0.0914697
429	12.001	23.788	17.787	11.2612	9.3931	10.3361					-0.376321	0.057883	-0.135762	-0.108783	-0.500675	-0.512788	-0.262741	0.0956841
432	15.05	17.3789	16.687	12.1992	11.8149	12.1303					-0.217867	-0.227138	-0.189209	-0.0345493	-0.371936	-0.428215	-0.244819	0.0571949
435	13.9375	19.5896	19.9255	10.2388	9.3512	10.8628					-0.275683	-0.128825	-0.0318558	-0.189696	-0.502903	-0.487961	-0.269487	0.0785012
438	9.7708	21.5527	17.3141	10.8338	10.9313	9.1776					-0.492222	-0.0415237	-0.158739	-0.142608	-0.418907	-0.567396	-0.303566	0.0883269
441	11.8875	24.844	19.7818	10.3259	10.2283	12.1022					-0.382219	0.104845	-0.0388379	-0.182803	-0.456277	-0.429539	-0.230805	0.0939992
444	13.5604	18.078	17.8943	8.4657	10.5612	11.4053					-0.29528	-0.196048	-0.130548	-0.33002	-0.438581	-0.462389	-0.308811	0.0534018
447	12.2042	22.4131	16.025	8.8325	11.9653	10.5055					-0.365761	-0.00326059	-0.221374	-0.300992	-0.363941	-0.504803	-0.293355	0.0693613
450	14.2854	20.7223	17.7859	8.5303	11.5997	11.7174					-0.257603	-0.0784526	-0.135815	-0.324908	-0.383375	-0.447678	-0.271305	0.0583888
453	12.4844	18.3352	18.2354	11.8153	10.6285	12.9664					-0.351199	-0.18461	-0.113975	-0.0649314	-0.435003	-0.388804	-0.25642	0.0633813
456	10.0771	18.8523	17.9104	12.1807	10.4578	11.0316					-0.476304	-0.161614	-0.129766	-0.0360134	-0.444077	-0.480004	-0.287963	0.0818928
459	14.7458	17.7565	17.0182	9.1438	9.4284	9.3765					-0.233676	-0.210346	-0.173116	-0.276355	-0.498799	-0.558021	-0.325052	0.0661879
462	9.9302	19.5828	19.0406	10.157	11.121	10.2579					-0.483938	-0.129128	-0.0748515	-0.19617	-0.408823	-0.516474	-0.301564	0.0781434
465	12.9656	18.0862	17.9073	10.0449	8.7652	8.1728					-0.326191	-0.195683	-0.129917	-0.205042	-0.534054	-0.614759	-0.334274	0.0808949
468	13.2365	19.3215	17.363	11.314	9.3846	9.6104					-0.312113	-0.140748	-0.156363	-0.104605	-0.501127	-0.546995	-0.293659	0.0786419
471	9.6948	16.3256	17.9406	7.2111	9.1118	11.2723					-0.496171	-0.27398	-0.128299	-0.42931	-0.515629	-0.468658	-0.385341	0.0623446
474	11.9271	21.067	18.8448	6.1266	9.9182	9.1015					-0.380161	-0.0631234	-0.0843651	-0.515138	-0.472762	-0.570983	-0.347755	0.0903538
477	12.8198	16.9384	18.0693	9.7665	9.0955	10.3155					-0.333769	-0.246728	-0.122045	-0.227074	-0.516495	-0.513759	-0.326645	0.0656424
480	13.1115	16.0616	15.9552	7.5686	10.1923	9.3498					-0.318609	-0.28572	-0.224766	-0.401017	-0.458191	-0.559279	-0.374597	0.0500922
483	11.4823	19.1436	16.5526	7.1887	10.7338	10.8738					-0.403277	-0.148659	-0.195739	-0.431083	-0.429406	-0.487442	-0.349268	0.0574282
486	14.2552	19.9398	16.525	10.6689	7.6854	10.7298					-0.259172	-0.113251	-0.19708	-0.155658	-0.591454	-0.49423	-0.301808	0.0797121
489	12.3823	17.3899	16.151	9.5171	9.3761	11.4664					-0.356505	-0.226649	-0.215252	-0.246812	-0.501579	-0.459509	-0.334384	0.0508488
492	11.8979	19.0342	17.6052	9.3931	7.4356	10.3217					-0.381679	-0.153525	-0.144595	-0.256625	-0.604733	-0.513467	-0.342437	0.0778425
495	14.101	24.6115	15.2589	9.5607	8.3754	9.7757					-0.267186	0.0945051	-0.258598	-0.243362	-0.554775	-0.539204	-0.29477	0.0972278
498	11.2479	13.8399	17.1667	9.3166	9.7809	10.6276					-0.415459	-0.384522	-0.165901	-0.26268	-0.48006	-0.499048	-0.367945	0.0529757
501	13.1615	17.6539	16.6411	9.1174	10.0811	11.6289					-0.316011	-0.214908	-0.191439	-0.278445	-0.464102	-0.451849	-0.319459	0.0474211
504	10.1667	14.8427	17.1349	8.847	11.5396	10.5953					-0.471647	-0.339926	-0.167446	-0.299844	-0.38657	-0.50057	-0.361001	0.0496735
507	11.2271	17.6621	17.662	9.5422	10.344	9.2682					-0.416539	-0.214544	-0.141835	-0.244826	-0.450127	-0.563126	-0.338499	0.0662884
510	12.5271	19.8878	16.0469	6.7137	9.2832	10.323					-0.34898	-0.115564	-0.22031	-0.468674	-0.506518	-0.513406	-0.362242	0.0673707
513	14.6073	19.7291	17.7932	10.8694	8.9621	12.2531					-0.240874	-0.122622	-0.13546	-0.13979	-0.523587	-0.422427	-0.264127	0.0695119
516	13.4979	16.316	18.6938	7.6319	10.5056	11.072					-0.298528	-0.274406	-0.0917019	-0.396008	-0.441536	-0.4781	-0.330047	0.0576189
519	12.8292	17.5499	17.6828	10.0871	7.7835	10.1502					-0.33328	-0.219533	-0.140825	-0.201702	-0.58624	-0.521551	-0.333855	0.0745481
522	14.3125	21.2408	15.3156	8.7071	9.8679	8.5823					-0.256195	-0.0553943	-0.255843	-0.310916	-0.475436	-0.595457	-0.324873	0.0770671
525	9.3833	15.8564	17.6943	10.7296	8.4846	9.7414					-0.51236	-0.294845	-0.140266	-0.150854	-0.54897	-0.54082	-0.364686	0.0791112
528	11.6302	16.7414	15.6479	9.3219	9.8221	10.2881					-0.395591	-0.255488	-0.239697	-0.26226	-0.47787	-0.515051	-0.35766	0.0497046
531	10.2427	15.6785	18.1073	7.8496	9.3937	10.1468					-0.467698	-0.302757	-0.120199	-0.378779	-0.500643	-0.521711	-0.381964	0.0621206
534	13.8365	13.42	16.0323	7.1491	9.2636	8.5021					-0.280932	-0.403195	-0.221019	-0.434217	-0.507559	-0.599237	-0.407693	0.0572427
537	14.45	18.7182	14.2469	9.9829	9.1321	9.8038					-0.249049	-0.167578	-0.307769	-0.209948	-0.51455	-0.537879	-0.331129	0.0645769
540	12.2396	16.87	16.6693	7.6372	7.7489	9.3909					-0.363921	-0.249769	-0.190069	-0.395588	-0.588079	-0.557342	-0.390795	0.0652133
543	12.4281	15.3858	17.6875	11.1187	11.0504	9.6509					-0.354125	-0.315774	-0.140596	-0.120061	-0.412576	-0.545086	-0.314703	0.0664353
546	11.3031	17.5103	15.7521	9.0541	10.9071	10.738					-0.41259	-0.221294	-0.234634	-0.283454	-0.420193	-0.493844	-0.344335	0.0460601
549	11.6625	19.7811	14.9458	8.8153	8.2544	8.5741					-0.393912	-0.120309	-0.27381	-0.302353	-0.561207	-0.595843	-0.374572	0.0739788
552	15.9073	15.316	17.2359	7.9103	7.9673	11.8004					-0.173314	-0.318878	-0.162539	-0.373975	-0.576469	-0.443765	-0.34149	0.0652044
555	13.8542	18.6293	17.8797	11.4512	8.9653	11.797					-0.280012	-0.171531	-0.131258	-0.0937464	-0.523417	-0.443926	-0.273982	0.0717603
558	12.4854	19.8988	16.7469	10.2625	7.8306	9.6893					-0.351147	-0.115075	-0.186298	-0.187821	-0.583736	-0.543276	-0.327892	0.0811063
561	16.2427	14.844	17.3115	8.153	8.0661	11.7263					-0.155884	-0.339868	-0.158865	-0.354768	-0.571217	-0.447258	-0.337977	0.0662992
564	11.8365	19.4829	15.6052	10.6201	9.9555	10.6043					-0.38487	-0.13357	-0.241771	-0.15952	-0.470779	-0.500146	-0.315109	0.0647768
567	11.599	20.0588	15.9255	7.0185	9.0013	9.9739					-0.397212	-0.107959	-0.226209	-0.444552	-0.521503	-0.529861	-0.371216	0.0693156
570	11.8323	17.1614	18.5271	8.4908	7.7927	8.9369					-0.385088	-0.23681	-0.0998016	-0.328034	-0.58575	-0.578742	-0.369038	0.0780708
573	11.826	17.829	13.7682	9.7797	8.898	10.9438					-0.385415	-0.207121	-0.331028	-0.22603	-0.526994	-0.484143	-0.360122	0.0535735
576	13.0427	18.1819	18.1094	7.0026	8.8169	10.3512					-0.322185	-0.191428	-0.120097	-0.445811	-0.531305	-0.512076	-0.353817	0.0700017
579	12.3948	15.5363	18.5938	6.8879	9.208	9.6454					-0.355855	-0.309081	-0.0965607	-0.454888	-0.510515	-0.545345	-0.378708	0.0673107
582	14.7406	17.5103	17.7719	9.1266	7.4787	9.6975					-0.233947	-0.221294	-0.136495	-0.277716	-0.602442	-0.54289	-0.335797	0.0775813
585	11.3531	19.6881	17.5953	6.9828	10.3303	8.8731					-0.409991	-0.124445	-0.145076	-0.447378	-0.450855	-0.581749	-0.359916	0.0751088
588	13.176	19.4637	16.1141	6.1662	9.8398	10.0741					-0.315257	-0.134424	-0.217045	-0.512004	-0.476929	-0.525138	-0.363466	0.0676507
591	11.2042	16.9973	15.5323	6.3997	7.2982	10.8416					-0.41773	-0.244108	-0.245313	-0.493525	-0.612037	-0.48896	-0.416946	0.0601227
594	11.426	21.119	17.9307	9.5633	10.2878	10.0021					-0.406203	-0.0608109	-0.12878	-0.243156	-0.453114	-0.528532	-0.303433	0.0767329
597	13.476	22.5021	15.526	7.3588	7.3355	9.6523					-0.299667	0.000697352	-0.24562	-0.417621	-0.610055	-0.54502	-0.352881	0.0906645
600	12.4917	17.0274	16.0292	8.9763	9.0883	11.1742					-0.35082	-0.24277	-0.22117	-0.289611	-0.516878	-0.473283	-0.349089	0.0499283
603	12.5115	19.6252	16.0807	8.843	9.2806	7.9074					-0.349791	-0.127242	-0.218668	-0.300161	-0.506656	-0.627269	-0.354964	0.0754155
606	11.9844	15.9398	14.5995	9.1702	8.467	10.1481					-0.377183	-0.291137	-0.290637	-0.274266	-0.549906	-0.52165	-0.38413	0.0502992
609	9.9104	17.4774	14.5177	8.4235	8.3754	10.251					-0.484967	-0.222758	-0.294611	-0.33336	-0.554775	-0.516799	-0.401212	0.0553084
612	13.0833	19.4911	15.6344	5.1953	10.2191	8.1831					-0.320075	-0.133206	-0.240353	-0.588841	-0.456766	-0.614274	-0.392252	0.0790551
615	9.2844	19.9822	14.4917	7.6821	9.8345	10.6591					-0.5175	-0.111366	-0.295874	-0.392035	-0.477211	-0.497563	-0.381925	0.0636504
618	10.2437	16.3379	16.6484	6.4723	9.3067	9.8882					-0.467646	-0.273433	-0.191084	-0.487779	-0.505268	-0.533901	-0.409852	0.0578431
621	11.8635	16.7168	17.3182	7.6438	11.4127	11.8896					-0.383466	-0.256582	-0.15854	-0.395066	-0.393316	-0.439561	-0.337755	0.0437922
624	10.7656	17.2148	17.5938	7.7757	8.8254	15.0199					-0.440523	-0.234436	-0.145149	-0.384627	-0.530854	-0.292008	-0.337933	0.057709
627	13.5885	21.3707	18.1792	6.3879	8.3996	10.0645					-0.29382	-0.0496175	-0.116705	-0.494458	-0.553488	-0.52559	-0.338947	0.0894776
630	11.2312	20.3488	15.4266	6.7797	9.0203	10.2401					-0.416326	-0.0950627	-0.250449	-0.463451	-0.520493	-0.517313	-0.377183	0.0694747
633	9.3708	19.4186	15.7411	7.4011	9.1733	10.5364					-0.513009	-0.13643	-0.235168	-0.414273	-0.51236	-0.503346	-0.385765	0.0662578
636	10.4438	22.5705	16.4865	5.9565	9.7842	10.6968					-0.457247	0.00373919	-0.198951	-0.5286	-0.479885	-0.495786	-0.359455	0.0873564
639	9.9854	20.5376	14.5453	9.9789	9.5736	10.7455					-0.481069	-0.0866665	-0.29327	-0.210265	-0.49108	-0.49349	-0.34264	0.0705776
642	12.8396	19.632	15.0031	7.4261	10.3741	11.2298					-0.33274	-0.12694	-0.271026	-0.412295	-0.448527	-0.470662	-0.343698	0.0529779
645	14.5188	18.4692	17.5953	8.5	8.5193	12.4684					-0.245473	-0.178651	-0.145076	-0.327306	-0.547125	-0.412278	-0.309318	0.0620758
648	10.1104	21.4925	14.6521	11.2625	8.3676	8.7078					-0.474573	-0.0442009	-0.288081	-0.10868	-0.55519	-0.589541	-0.343378	0.0949246
651	10.7219	21.5103	17.9406	6.5488	9.9222	10.3909					-0.442794	-0.0434093	-0.128299	-0.481725	-0.472549	-0.510205	-0.346497	0.0836106
654	12.049	20.238	15.2594	5.4433	11.225	10.0007					-0.373826	-0.0999901	-0.258573	-0.569215	-0.403294	-0.528598	-0.372249	0.0710056
657	15.9781	17.8071	16.6995	7.5501	8.584	8.4033					-0.169635	-0.208095	-0.188601	-0.402481	-0.543686	-0.603894	-0.352732	0.0781887
660	12.349	21.9357	13.7625	8.3879	8.8816	10.5508					-0.358236	-0.0244912	-0.331305	-0.336177	-0.527866	-0.502668	-0.34679	0.073359
663	11.0146	15.8824	15.8042	8.6544	9.6906	9.9067					-0.427583	-0.293689	-0.232102	-0.315087	-0.484861	-0.533029	-0.381058	0.0483763
666	11.5781	22.6744	17.5917	8.186	9.535	11.0178					-0.398298	0.00835975	-0.145251	-0.352156	-0.493132	-0.480655	-0.310189	0.0817984
669	13.2625	20.7414	16.9859	6.8232	9.3329	9.3251					-0.310762	-0.0776032	-0.174686	-0.460009	-0.503876	-0.560443	-0.347896	0.0788488
672	10.174	17.3338	16.5734	8.8417	8.9588	12.3313					-0.471268	-0.229144	-0.194728	-0.300264	-0.523762	-0.41874	-0.356318	0.0549467
675	10.5406	21.7948	15.4062	8.6398	10.4572	10.9513					-0.452216	-0.0307572	-0.25144	-0.316242	-0.444109	-0.483789	-0.329759	0.0701227
678	10.9875	21.3516	15.1964	6.9235	9.6423	10.1818					-0.428991	-0.0504669	-0.261634	-0.452071	-0.487428	-0.520061	-0.366775	0.0730994
681	12.5865	19.1231	14.6885	8.6596	10.7959	10.2606					-0.345893	-0.149571	-0.286312	-0.314675	-0.426104	-0.516347	-0.339817	0.0510991
684	10.999	17.7373	14.0182	6.2071	8.3623	10.749					-0.428394	-0.211199	-0.318881	-0.508767	-0.555471	-0.493325	-0.41934	0.0533852
687	10.8271	19.9207	16.513	7.0541	10.5827	9.8416					-0.437327	-0.114101	-0.197663	-0.441735	-0.437438	-0.536097	-0.360727	0.0674496
690	12.0844	22.4637	16.0464	8.3232	8.6122	8.5062					-0.371987	-0.00101035	-0.220334	-0.341298	-0.542187	-0.599044	-0.345977	0.0890744
693	13.4667	22.6142	15.4255	7.2955	8.6736	9.4383					-0.30015	0.00568258	-0.250503	-0.422631	-0.538923	-0.555108	-0.343605	0.0859623
696	12.5156	22.223	18.1109	6.8681	9.8888	9.3052					-0.349578	-0.0117146	-0.120024	-0.456455	-0.474325	-0.561381	-0.328913	0.0887186
699	13.3208	18.9001	18.2464	5.2164	9.5317	9.4177					-0.307732	-0.159488	-0.11344	-0.587172	-0.493308	-0.556079	-0.369536	0.0838665
702	11.9406	20.0889	17.5349	6.4776	9.3015	10.2305					-0.37946	-0.106621	-0.148011	-0.48736	-0.505545	-0.517766	-0.35746	0.0756691
705	11.2615	17.7852	14.5318	9.7348	9.6998	11.5254					-0.414752	-0.209069	-0.293926	-0.229583	-0.484372	-0.456728	-0.348072	0.0486905
708	13.9927	18.0711	14.4286	8.3245	9.5867	9.6413					-0.272814	-0.196355	-0.29894	-0.341195	-0.490384	-0.545539	-0.357538	0.054727
711	13.2104	20.4815	16.5734	7.8865	10.0373	8.2106					-0.313469	-0.0891613	-0.194728	-0.375859	-0.466431	-0.612978	-0.342104	0.0767004
714	12.9781	15.2298	17.1229	7.3153	9.5572	8.6852					-0.325542	-0.322711	-0.168029	-0.421064	-0.491952	-0.590606	-0.386651	0.0604121
717	12.1146	16.6238	15.2953	6.0396	8.7273	10.1063					-0.370417	-0.260718	-0.256829	-0.522023	-0.536068	-0.52362	-0.411613	0.0543598
720	14.4927	15.7415	14.7495	6.5989	9.3532	9.6372					-0.24683	-0.299955	-0.283348	-0.47776	-0.502796	-0.545732	-0.392737	0.0531077
723	11.8458	16.2572	15.8734	7.1794	8.1478	8.9088					-0.384386	-0.277021	-0.22874	-0.431819	-0.566874	-0.580067	-0.411484	0.0592141
726	13.026	15.0999	14.7714	8.4314	10.1707	10.5151					-0.323053	-0.328488	-0.282284	-0.332735	-0.459339	-0.504351	-0.371708	0.0360666
729	10.4563	19.3215	16.7839	7.2375	9.0929	9.9143					-0.456597	-0.140748	-0.184501	-0.427221	-0.516634	-0.53267	-0.376395	0.0696318
732	11.2573	16.5171	16.074	7.3232	9.1524	9.9431					-0.41497	-0.265463	-0.218993	-0.420438	-0.513471	-0.531313	-0.394108	0.0520947
735	9.3042	13.8222	16.4859	8.5818	7.9974	9.1756					-0.516471	-0.385309	-0.19898	-0.320832	-0.574869	-0.56749	-0.427325	0.0618089
738	9.7948	14.0657	16.2437	4.6834	9.2217	11.9849					-0.490975	-0.37448	-0.210748	-0.629353	-0.509787	-0.435069	-0.441735	0.0577867
741	12.1438	18.4405	16.9521	6.281	9.5376	10.1975					-0.3689	-0.179927	-0.176328	-0.502919	-0.492994	-0.519321	-0.373398	0.0654879
744	10.025	13.5499	14.9161	6.0646	9.0824	8.749					-0.479011	-0.397419	-0.275254	-0.520045	-0.517192	-0.587599	-0.462753	0.0452848
747	11.2844	14.4952	16.6359	5.9565	7.2963	10.0261					-0.413562	-0.35538	-0.191692	-0.5286	-0.612138	-0.5274	-0.438129	0.0618105
750	11.8958	18.8947	15.4401	6.8285	10.692	9.5171					-0.381788	-0.159728	-0.249793	-0.459589	-0.431628	-0.551393	-0.37232	0.0587362
753	13.9281	13.4774	16.913	8.591	8.0438	9.3196					-0.276171	-0.400643	-0.178228	-0.320104	-0.572402	-0.560703	-0.384708	0.0645614
756	13.1479	14.1518	14.5005	9.2137	9.1445	9.3882					-0.316718	-0.370651	-0.295447	-0.270823	-0.513891	-0.557469	-0.3875	0.0490732
759	11.5406	14.041	14.9094	9.1979	7.325	9.6214					-0.400247	-0.375579	-0.275579	-0.272074	-0.610613	-0.546477	-0.413428	0.0569132
762	10.1573	14.4077	14.412	9.5501	7.6985	11.751					-0.472136	-0.359271	-0.299747	-0.2442	-0.590758	-0.446094	-0.402034	0.0515348
765	11.4573	16.9111	16.299	6.4274	10.8339	10.9211					-0.404576	-0.247942	-0.208061	-0.491332	-0.424084	-0.485213	-0.376868	0.0493139
768	11.4302	17.5349	18.1661	8.0462	9.9765	8.6145					-0.405985	-0.2202	-0.117342	-0.36322	-0.469663	-0.593939	-0.361725	0.0700684
771	11.8292	16.6306	18.3755	7.128	9.363	11.5233					-0.385249	-0.260416	-0.107168	-0.435887	-0.502275	-0.456827	-0.35797	0.0605064
774	11.251	13.5581	18.3891	6.1847	9.4801	8.8573					-0.415297	-0.397054	-0.106507	-0.51054	-0.496051	-0.582494	-0.41799	0.0681146
777	11.2104	17.2558	18.1089	9.0053	8.7338	10.6907					-0.417407	-0.232612	-0.120121	-0.287316	-0.535723	-0.496073	-0.348209	0.0660576
780	14.0802	16.5103	16.5688	7.8338	7.5834	8.2984					-0.268267	-0.265766	-0.194952	-0.380029	-0.596877	-0.608839	-0.385788	0.0727961
783	9.1	13.6922	17.7984	7.8087	7.4153	8.6804					-0.527083	-0.39109	-0.135208	-0.382016	-0.605813	-0.590833	-0.438674	0.0722195
786	13.5552	14.6088	15.8146	7.7256	10.3819	9.465					-0.295551	-0.350328	-0.231597	-0.388592	-0.448112	-0.553849	-0.378005	0.0465289
789	13.7656	12.5951	14.3901	8.1201	8.8483	9.954					-0.284616	-0.43988	-0.300811	-0.357371	-0.529636	-0.530799	-0.407186	0.0447823
792	9.8604	15.093	17.8146	7.7625	7.6913	8.1612					-0.487565	-0.328795	-0.134421	-0.385672	-0.591141	-0.615306	-0.423817	0.0737029
795	12.1979	13.6101	16.2656	8.0818	8.7959	11.3032					-0.366088	-0.394741	-0.209684	-0.360402	-0.532422	-0.467202	-0.388423	0.0448008
798	11.3052	14.6005	16.6286	5.7282	9.9366	10.0741					-0.412481	-0.350697	-0.192046	-0.546667	-0.471784	-0.525138	-0.416469	0.0537053
801	12.8948	12.0397	16.5677	6.6227	11.0693	7.6269					-0.329871	-0.464579	-0.195005	-0.475876	-0.411571	-0.640491	-0.419566	0.0612486
804	10.3073	15.5308	16.7214	5.9433	9.3643	10.6529					-0.464341	-0.309325	-0.187537	-0.529644	-0.502206	-0.497855	-0.415151	0.0556639
807	11.8531	12.0944	17.6297	7.3641	8.9241	10.1132					-0.384007	-0.462146	-0.143405	-0.417202	-0.525607	-0.523295	-0.409277	0.0579417
810	12.4573	16.9644	17.7807	8.686	9.9529	9.6968					-0.352607	-0.245571	-0.136068	-0.312586	-0.470917	-0.542923	-0.343445	0.0604597
813	10.4573	14.3707	16.6359	7.6794	9.0026	9.537					-0.456545	-0.360916	-0.191692	-0.392249	-0.521434	-0.550455	-0.412215	0.0531241
816	12.576	14.8386	16.25	7.215	9.6756	9.3121					-0.346439	-0.340108	-0.210442	-0.429001	-0.485658	-0.561056	-0.395451	0.0504584
819	9.501	15.0465	15.3938	6.8799	10.1269	10.19					-0.506243	-0.330863	-0.252043	-0.455521	-0.461668	-0.519675	-0.421002	0.043405
822	15.274	17.5404	16.2141	9.2678	9.2106	9.3265					-0.206226	-0.219956	-0.212186	-0.266542	-0.510377	-0.560377	-0.329277	0.0660664
825	11.6375	17.8098	17.4849	9.7177	7.4624	10.3649					-0.395211	-0.207975	-0.15044	-0.230936	-0.603309	-0.51143	-0.349884	0.074485
828	10.8667	19.3899	14.6599	7.3931	11.6037	9.321					-0.435269	-0.137706	-0.287702	-0.414906	-0.383163	-0.560637	-0.369897	0.058744
831	11.7125	15.0055	16.8589	8.5541	8.5023	9.2147					-0.391314	-0.332686	-0.180856	-0.323024	-0.548029	-0.565647	-0.39026	0.0598159
834	10.1062	16.4118	14.9661	8.967	8.1766	11.8683					-0.474791	-0.270146	-0.272824	-0.290347	-0.565343	-0.440565	-0.385669	0.0511223
837	12.0281	18.7962	19.824	9.9723	10.881	11.0014					-0.374912	-0.164109	-0.0367875	-0.210787	-0.421581	-0.481428	-0.281601	0.0699964
840	11.8021	15.6731	15.6776	4.8549	9.9235	10.2359					-0.386657	-0.302997	-0.238254	-0.615781	-0.47248	-0.517511	-0.42228	0.0572697
