# Supplementary material for: Hugin-AstA circuitry is a novel central energy sensor that directly regulates sweet sensation in Drosophila and mouse
Source: eLife. 2026 May 5;14:RP108551. doi: 10.7554/eLife.108551 (PMC13143273; doi:10.7554/eLife.108551)
Supplement: Figure 1—figure supplement 7—source data 1. [file elife-108551-fig1-figsupp7-data1.xlsx]

## Sheet: B
	hugin lateral 50glucose.oir	huginlateral 50glucose_0001.oir	hugin lateral 50glucose_0002.oir	hugin lateral 50glucose_0003.oir	hugin lateral 50glucose_0004.oir	hugin lateral 50glucose_0009.oir	hugin lateral 50glucose15.oir				hugin lateral 50glucose.oir	huginlateral 50glucose_0001.oir	hugin lateral 50glucose_0002.oir	hugin lateral 50glucose_0003.oir	hugin lateral 50glucose_0004.oir	hugin lateral 50glucose_0009.oir	hugin lateral 50glucose15.oir							hugin intermediate 50glucose_0004.oir	hugin intermediate 50glucose_0005.oir	hugin intermediate 50glucose_0006.oir	hugin intermediate 50glucose_0007.oir	hugin intermediate 50glucose_0009.oir	hugin intermediate 50glucose_0010.oir					hugin intermediate 50glucose_0004.oir	hugin intermediate 50glucose_0005.oir	hugin intermediate 50glucose_0006.oir	hugin intermediate 50glucose_0007.oir	hugin intermediate 50glucose_0009.oir	hugin intermediate 50glucose_0010.oir						peak
time(sec)	raw data	raw data	raw data	raw data	raw data	raw data	raw data				F/F0	F/F0	F/F0	F/F0	F/F0	F/F0	F/F0	mean	SEM					raw data	raw data	raw data	raw data	raw data	raw data					F/F0	F/F0	F/F0	F/F0	F/F0	F/F0	Mean	SEM				lateral	intermediate
0	592.903	187.165	226.906	46.1233	136.055	275.024	167.866				-0.00798929	0.00520639	-0.010284	-0.0865128	-0.0488079	0.191868	0.0641859	0.0153808	0.0342749					228.054	114.575	227.999	83.9798	282.727	57.5795					0.0213582	0.0350047	-0.000896217	0.0800705	-0.0545905	-0.0185598	0.0103978	0.0189469				0.107779
3	614.674	199.246	225.524	49.0149	131.017	223.827	176.872				0.0284367	0.0700899	-0.0163098	-0.0292437	-0.0840311	-0.0300017	0.121282	0.00860318	0.0262746					221.952	105.312	226.975	75.3256	288.409	60.3976					-0.00596881	-0.0486789	-0.00538344	-0.0312318	-0.0355915	0.0294746	-0.01623	0.0114959				0.659098	1.74421
6	607.613	199.968	239.143	55.6883	131.478	241.854	155.192				0.0166221	0.0739702	0.0430913	0.102925	-0.0808102	0.0481209	-0.0161616	0.0268225	0.0230265					218.405	112.058	230.39	79.3377	294.365	53.2934					-0.0218562	0.0122631	0.00957863	0.0203681	-0.0156739	-0.0916162	-0.0144894	0.0168466				0.532042	1.37587
9	596.879	182.652	228.833	52.771	147.698	234.31	165.136				-0.00133722	-0.0190316	-0.00187579	0.0451471	0.032593	0.0154245	0.046879	0.0168284	0.00966247					216.574	107.948	229.452	75.5136	294.317	63.181					-0.030056	-0.0248669	0.00546827	-0.0288139	-0.0158358	0.0769175	-0.00286446	0.0168322				0.927906	0.379545
12	597.334	190.821	231.241	48.3997	142.745	227.431	160.807				-0.000576104	0.0248422	0.00862611	-0.0414279	-0.00203665	-0.0143826	0.0194347	-0.000788612	0.00844098					215.973	108.39	226.381	81.1284	300.373	61.6252					-0.0327481	-0.0208732	-0.00798681	0.0433985	0.00441551	0.050399	0.00610081	0.0138943				0.878116	2.60269
15	600.066	189.869	229.868	48.9431	139.775	230.476	172.947				0.00399525	0.0197277	0.00263518	-0.0306657	-0.0228027	-0.00118784	0.0964	0.00972885	0.0158146					219.807	99.8511	234.849	79.7553	286.941	59.8766					-0.0155758	-0.0980057	0.0291199	0.0257389	-0.0405004	0.0205941	-0.0131048	0.0203242				0.0559497	1.2188
18	598.431	183.851	231.363	51.4783	149.236	234.515	160.649				0.001259	-0.0125894	0.00915999	0.0195448	0.0433399	0.0163146	0.0184324	0.0136373	0.00656182					209.758	100.519	233.743	77.1618	287.084	55.9872					-0.060582	-0.0919696	0.0242725	-0.00761626	-0.0400205	-0.0457005	-0.0369361	0.0166135				0.52698	1.16811
21	597.844	185.371	221.556	45.6382	133.127	242.774	157.243				0.000276696	-0.0044249	-0.033617	-0.0961203	-0.0692768	0.0521061	-0.00315869	-0.0220307	0.0185907					208.882	104.536	216.704	78.2983	306.668	60.4534					-0.0645026	-0.055687	-0.0503919	0.00700035	0.0254647	0.0304257	-0.0179485	0.0177869			Mean	0.526839	1.41487
24	592.487	194.327	234.986	51.8076	136.163	211.658	145.947				-0.00868548	0.0436708	0.0249606	0.0260667	-0.0480508	-0.0827414	-0.0747666	-0.017078	0.019511					213.763	106.052	221.256	86.7472	282.708	52.4214					-0.0426422	-0.0419869	-0.030447	0.115662	-0.0546531	-0.106479	-0.0267577	0.0305041			TTEST		0.015113
27	599.656	186.565	240.797	48.9241	143.992	239.738	159.893				0.00330977	0.00198558	0.0503083	-0.031042	0.00667651	0.0389504	0.0136423	0.0119758	0.0100633					212.317	109.106	230.793	81.5561	303.31	57.6718					-0.0491218	-0.0144053	0.0113472	0.0488992	0.0142385	-0.0169866	-0.00100479	0.0136938					*
30	581.04	177.77	239.026	50.0894	155.132	235.069	149.177				-0.0278376	-0.0452487	0.0425831	-0.00796283	0.0845594	0.0187138	-0.05429	0.00150246	0.0189807					226.894	115.488	221.201	91.001	298.223	53.6335					0.016163	0.0432494	-0.030688	0.170371	-0.00277319	-0.0858192	0.0184171	0.0353257			SEM	0.129018	0.299562
33	593.568	198.517	230.556	57.2737	142.641	246.018	156.824				-0.00687749	0.0661779	0.00563915	0.134325	-0.00276373	0.0661651	-0.00581177	0.0366934	0.0204101					225.914	108.019	235.006	73.5753	303.791	58.9735					0.0117767	-0.0242192	0.0298088	-0.0537425	0.0158453	0.00520084	-0.00255501	0.0125712
36	607.019	181.075	212.512	46.9986	145.038	226.545	154.155				0.0156289	-0.0274991	-0.0730655	-0.0691772	0.0139942	-0.0182262	-0.0227338	-0.0258684	0.0133498					227.129	109.206	230.83	73.8241	298.914	57.6463					0.0172177	-0.0135001	0.0115102	-0.0505427	-0.000462227	-0.0174212	-0.00886638	0.00999631
39	598.332	186.322	230.924	53.416	154.571	221.009	151.859				0.00109436	0.000682106	0.00724211	0.0579216	0.0806408	-0.0422162	-0.0372868	0.00972544	0.017198					228.088	117.097	231.589	76.3519	299.473	57.5356					0.0215118	0.0577869	0.0148367	-0.0180324	0.00140534	-0.0193081	0.00970002	0.0117723			P value	0.0151
42	589.231	179.623	218.446	51.9201	127.541	212.488	153.61				-0.0141339	-0.0352989	-0.0471839	0.0282948	-0.10833	-0.0791427	-0.0261876	-0.0402831	0.0167604					229.321	117.582	225.94	75.3104	294.247	61.1545					0.0270343	0.0621627	-0.00991798	-0.0314273	-0.0160705	0.0423759	0.0123595	0.0150759			95% confidence interval	0.2081 to 1.568
45	626.739	175.074	241.623	51.1667	142.868	226.259	145.679				0.0486223	-0.0597308	0.0539081	0.0133735	-0.00117533	-0.0194643	-0.0764681	-0.00584781	0.0189014					217.341	111.011	228.201	72.3145	316.371	59.2249					-0.0266214	0.00280604	-1.3672e-05	-0.0699578	0.0579125	0.00948595	-0.00439805	0.0172612			F, DFn, Dfd	4.621, 5, 6
48	581.147	171.851	226.086	46.7154	154.671	215.774	167.759				-0.0276594	-0.0770379	-0.0138576	-0.074786	0.0813386	-0.0649035	0.0635075	-0.0161998	0.0246448					231.171	112.019	231.626	75.7543	299.674	58.0375					0.0353211	0.0119144	0.0149962	-0.0257182	0.00207846	-0.0107532	0.00463977	0.0086922
51	590.961	180.87	221.904	48.2263	147.338	244.158	149.12				-0.0112384	-0.0286011	-0.0321017	-0.0448621	0.0300698	0.0581035	-0.0546545	-0.0118978	0.0156326					241.522	115.463	217.76	71.7371	320.789	66.6481					0.0816785	0.0430245	-0.0457653	-0.0773837	0.0726862	0.136014	0.0350424	0.0331765
54	608.663	182.241	232.207	54.9919	151.696	215.08	157.663				0.0183789	-0.0212357	0.0128387	0.0891328	0.0605432	-0.0679085	-0.000495464	0.0130363	0.0195094					232.731	117.849	238.774	70.0253	312.852	58.4799					0.0423077	0.0645791	0.0463186	-0.0993993	0.0461436	-0.00321255	0.0161229	0.024877
57	578.977	190.728	221.767	50.2425	147.947	211	146.423				-0.0312891	0.0243454	-0.0326971	-0.00493064	0.0343296	-0.0855916	-0.0717489	-0.0239403	0.0171169					240.099	121.926	224.606	76.3822	309.813	59.5466					0.0753059	0.101402	-0.0157667	-0.0176428	0.0359816	0.0149693	0.0323749	0.0197848
60	564.973	179.292	214.508	50.0298	153.83	212.039	139.591				-0.0547211	-0.0370761	-0.0643598	-0.00914323	0.075461	-0.0810902	-0.115062	-0.040856	0.0231042					229.229	117.218	228.301	73.3772	309.964	64.6389					0.0266201	0.0588745	0.0004276	-0.0562903	0.0364875	0.101767	0.0279811	0.0218586
63	580.048	175.241	213.887	43.0149	153.304	214.327	140.821				-0.0294972	-0.0588307	-0.0670663	-0.148076	0.0717795	-0.0711717	-0.107264	-0.0585895	0.0260264					231.543	115.213	225.991	72.2548	293.209	60.7852					0.0369849	0.0407662	-0.00969756	-0.0707256	-0.0195398	0.0360812	0.00231155	0.0180532
66	593.568	174.196	215.902	51	162.459	219.58	134.192				-0.00687749	-0.064442	-0.0582812	0.0100719	0.135784	-0.0484069	-0.149291	-0.0259204	0.0331172					220.59	119.595	225.708	78.5369	312.998	60.5658					-0.01207	0.080346	-0.0109364	0.010069	0.0466339	0.0323415	0.0243973	0.0146873
69	574.521	169.295	215.44	55.2033	137.221	224.229	142.521				-0.0387453	-0.0907676	-0.0602955	0.0933197	-0.040659	-0.0282604	-0.0964889	-0.0374138	0.0239282					233.333	123.527	221.305	75.365	304.172	69.5302					0.0450002	0.115865	-0.0302297	-0.030725	0.017118	0.185139	0.0503613	0.034957
72	579.134	167.525	236.233	56.065	144.355	238.033	142.99				-0.0310273	-0.100275	0.0303998	0.110386	0.00921502	0.0315597	-0.0935118	-0.00617908	0.02832					233.723	115.523	220.038	68.6087	307.117	64.9634					0.0467504	0.0435647	-0.035783	-0.117618	0.0269671	0.107298	0.0118632	0.0319342
75	568.123	180.906	224.428	53.5488	145.813	225.39	138.144				-0.0494507	-0.0284067	-0.0210921	0.0605517	0.0194124	-0.0232303	-0.124237	-0.0237789	0.0216888					238.234	122.046	224.65	67.1951	298.148	54.7532					0.0669529	0.10249	-0.015573	-0.135799	-0.00302365	-0.066734	-0.0086145	0.0354438
78	554.573	164.381	225.865	48.2859	148.794	204.622	142.639				-0.0721218	-0.117155	-0.0148207	-0.0436817	0.0402526	-0.113232	-0.0957395	-0.0594998	0.0217567					236.765	119.278	217.381	70.087	326.379	62.6554					0.0603707	0.0774815	-0.0474253	-0.0986058	0.0913775	0.0679587	0.0251929	0.0320314
81	561.292	160.337	225.574	43.4214	161.017	220.253	142.276				-0.0608795	-0.138879	-0.0160909	-0.140025	0.125706	-0.045492	-0.0980382	-0.0533855	0.0346384					236.982	112.345	229.536	68.0283	291.724	64.4223					0.061343	0.0148539	0.00583812	-0.125083	-0.0245058	0.0980754	0.00508694	0.0314788
84	569.365	174.421	221.428	50.8957	155.662	224.982	140.016				-0.0473729	-0.063239	-0.0341775	0.00800621	0.0882704	-0.0249976	-0.112368	-0.0265541	0.0236959					225.72	114.91	219.023	72.4439	298.93	61.0091					0.0109065	0.0380263	-0.0402326	-0.0682935	-0.000410062	0.0398976	-0.00335096	0.0176751
87	553.005	165.366	213.199	49.706	156.645	218.908	132.466				-0.0747449	-0.11187	-0.0700703	-0.0155562	0.0951427	-0.0513221	-0.160228	-0.0555213	0.0304859					221.351	126.324	224.105	74.453	305.69	63.0192					-0.00866089	0.141138	-0.0179625	-0.0424543	0.0221937	0.0741596	0.0280689	0.0279195
90	532.839	155.387	224.353	51.6626	145.609	208.783	134.311				-0.108486	-0.165461	-0.0214162	0.0231949	0.0179869	-0.0952007	-0.148532	-0.0711305	0.0293479					229.886	113.992	223.869	70.6532	306.663	51.0731					0.0295629	0.0297319	-0.0189945	-0.0913239	0.0254489	-0.129461	-0.0258393	0.028202
93	548.723	152.637	198.625	51.5434	129.822	238.908	132.77				-0.0819097	-0.18023	-0.13364	0.0208341	-0.0923877	0.0353517	-0.158304	-0.0843266	0.0318308					222.302	122.53	188.225	57.4115	246.295	53.4104					-0.00440265	0.106864	-0.17519	-0.261626	-0.176416	-0.089622	-0.100066	0.0546673
96	565.256	165.201	185.898	55.2656	144.764	204.777	121.048				-0.0542461	-0.112755	-0.189153	0.0945535	0.0120793	-0.112561	-0.232616	-0.0849569	0.0427557					243.461	118.16	179.305	89.277	314.64	62.4625					0.0903593	0.0673849	-0.214276	0.148198	0.0521219	0.0646707	0.0347432	0.0517168
99	515.193	160.091	198.938	58.4553	160.106	181.565	153.554				-0.138009	-0.140198	-0.132274	0.157727	0.119338	-0.213152	-0.0265419	-0.0533015	0.0538004					256.926	131.653	226.215	99.0566	374.699	56.6271					0.150664	0.18927	-0.00871642	0.273974	0.252954	-0.0347934	0.137225	0.0535014
102	538.429	203.832	223.606	56.1816	138.667	113.634	148.323				-0.0991323	0.0947237	-0.0246745	0.112695	-0.0305503	-0.507546	-0.0597077	-0.073456	0.078139					285.05	138.573	245.445	84.8645	380.959	65.1993					0.276622	0.251789	0.0755504	0.0914487	0.273888	0.111319	0.180103	0.0394853
105	513.684	222.964	243.267	53.4621	193.652	140.271	126.803				-0.140534	0.197473	0.0610815	0.0588346	0.353863	-0.39211	-0.196129	-0.00821728	0.0954814					299.409	152.835	223.893	77.6471	425.98	69.7934					0.340929	0.380615	-0.0188894	-0.00137478	0.424431	0.189626	0.219223	0.0794161
108	483.827	218.263	267.02	57.042	215.947	148.542	122.498				-0.190488	0.172226	0.164687	0.129736	0.509733	-0.356266	-0.223421	0.029458	0.113441					347.179	148.959	265.546	71.3134	523.616	74.3455					0.554873	0.345602	0.163636	-0.082833	0.750918	0.267216	0.333235	0.119718
111	514.147	258.35	253.03	78.729	222.512	120.286	143.952				-0.13976	0.38752	0.103666	0.559254	0.555629	-0.478719	-0.0874151	0.128596	0.148243					335.317	157.396	266.667	80.458	569.807	74.6353					0.501744	0.421821	0.168548	0.0347764	0.905374	0.272156	0.38407	0.124901
114	333.327	238.74	281.564	72.3957	220.011	118.601	159.157				-0.442296	0.282202	0.228126	0.433821	0.538143	-0.486019	0.00897385	0.0804214	0.154004					383.894	159.955	252.352	105.384	600.85	85.0037					0.719301	0.444936	0.105818	0.355354	1.00918	0.448885	0.513912	0.12756
117	416.25	269.759	275.87	80.4512	247.616	93.4732	171.492				-0.303555	0.448794	0.203287	0.593363	0.731136	-0.594916	0.0871742	0.166469	0.18186					451.113	179.232	271.076	87.8726	588.741	85.3218					1.02035	0.61907	0.187868	0.130136	0.968688	0.454307	0.563403	0.154575
120	517.168	277.499	261.946	89.313	233.713	93.3214	178.764				-0.134705	0.490363	0.142554	0.768874	0.633942	-0.595574	0.133273	0.205532	0.1792					488.894	186.427	280.906	130.859	621.165	89.3254					1.18955	0.684072	0.230942	0.682994	1.07711	0.522548	0.731203	0.144693
123	548.927	254.149	292.761	82.9959	230.89	86.7083	165.987				-0.081567	0.364958	0.276964	0.643761	0.6142	-0.624233	0.0522765	0.178051	0.167525					501.349	192.204	279.211	159.323	623.151	94.9717					1.24533	0.736254	0.223515	1.04906	1.08375	0.618789	0.826117	0.153407
126	557.942	251.009	267.41	92.9837	230.157	87.2887	182.227				-0.0664843	0.348094	0.166386	0.841573	0.609079	-0.621718	0.155227	0.204594	0.179292					495.121	204.392	290.339	169.365	623.013	94.0996					1.21744	0.846349	0.272281	1.17822	1.08329	0.603924	0.866917	0.151633
129	538.776	264.997	268.44	97.3428	229.811	103.905	164.342				-0.0985521	0.423221	0.17088	0.927906	0.60666	-0.549709	0.0418461	0.217465	0.183872					516.747	229.166	296.601	197.373	638.894	99.5146					1.3143	1.07015	0.299721	1.53843	1.13639	0.696222	1.0092	0.18206
132	587.276	262.97	284.588	81.6436	199.04	91.2738	217.573				-0.0174047	0.412333	0.241316	0.616979	0.391535	-0.604448	0.379308	0.202803	0.153052					567.898	215.94	294.074	201.17	606.279	99.8501					1.54338	0.950674	0.288649	1.58726	1.02733	0.701941	1.01654	0.203022
135	609.753	249.069	288.504	88.3496	198.834	79.8095	203.818				0.0202031	0.337678	0.258396	0.749793	0.390095	-0.65413	0.292104	0.199163	0.164108					584.634	223.487	306.346	195.698	618.14	97.8803					1.61834	1.01885	0.342421	1.51688	1.067	0.668366	1.03864	0.198979
138	591.982	278.741	262.271	89.0854	197.259	90.5982	211.062				-0.00953025	0.497037	0.143973	0.764366	0.379081	-0.607376	0.33803	0.215083	0.165843					572.377	229.667	298.792	197.527	643.663	109.907					1.56344	1.07468	0.309323	1.54041	1.15234	0.873357	1.08559	0.190386
141	581.424	292.01	282.185	90.5515	177.624	72.5595	221.842				-0.0271953	0.5683	0.230833	0.793402	0.24181	-0.68555	0.406368	0.218281	0.180379					600.336	227.539	301.568	194.066	614.117	106.453					1.68866	1.05545	0.321485	1.49589	1.05354	0.814478	1.07158	0.199178
144	599.724	258.269	287.026	84.9472	179.915	76.4405	195.612				0.0034232	0.387086	0.251949	0.682407	0.257826	-0.668731	0.240082	0.164863	0.15887					593.538	238.046	288.599	185.518	651.992	107.151					1.65821	1.15036	0.264654	1.38596	1.18019	0.826381	1.07763	0.197653
147	592.763	258.514	273.03	82.2981	195.123	79.4881	219.311				-0.00822403	0.388405	0.190902	0.629941	0.364149	-0.655523	0.390326	0.185711	0.158673					596.139	238.391	301.626	200.681	634	97.8675					1.66986	1.15348	0.32174	1.58098	1.12003	0.668147	1.08571	0.212156
150	597.474	271.185	278.283	81.8604	177.917	85.6042	229.089				-0.000341363	0.456455	0.213814	0.621272	0.243859	-0.629018	0.452314	0.194051	0.15707					598.589	240.185	301.199	173.506	651.033	109.308					1.68083	1.16968	0.319869	1.23147	1.17699	0.86315	1.07366	0.18493
153	571.961	297.078	280.918	89.8943	186.31	71.7708	233.093				-0.043028	0.595518	0.225306	0.780386	0.302535	-0.688968	0.477692	0.235634	0.184002					592.794	233.846	303.533	176.49	559.133	118.173					1.65488	1.11243	0.330096	1.26986	0.869681	1.01425	1.04187	0.179794
156	580.047	266.692	282.723	92.2656	165.325	82.8095	228.602				-0.0294999	0.432325	0.23318	0.827351	0.155822	-0.641129	0.449224	0.203896	0.174081					612.739	231.272	306.854	178.376	595.768	122.332					1.74421	1.08917	0.344648	1.29411	0.992184	1.08514	1.09158	0.185721
159	595.755	260.929	308.1	86.3984	189.076	77.4464	204.281				-0.00321816	0.401374	0.343871	0.711149	0.321875	-0.664371	0.295041	0.200817	0.164378					579.282	221.431	314.817	191.022	624.473	111.636					1.59437	1.00027	0.379545	1.45675	1.08817	0.902834	1.07032	0.176484
162	542.355	283.209	312.113	85.6707	185.839	76.8333	200.77				-0.0925637	0.521035	0.361371	0.696737	0.299239	-0.667028	0.272782	0.198796	0.171014					584.578	236.815	312.648	143.634	575.378	123.408					1.61808	1.13925	0.370037	0.847288	0.924002	1.10348	1.00036	0.16714
165	555.05	280.231	280.321	94.0135	173.924	76.7113	198.973				-0.071323	0.505039	0.222704	0.861969	0.215938	-0.667557	0.261389	0.189737	0.180035					575.37	228.256	308.728	180.375	639.501	122.376					1.57685	1.06192	0.352862	1.31982	1.13842	1.08589	1.08929	0.166969
168	532.7	271.585	262.598	84.4079	190.017	67.5744	197.891				-0.108718	0.458605	0.145401	0.671726	0.328451	-0.707154	0.254533	0.148978	0.169865					572.464	247.669	300.472	233.184	613.872	108.573					1.56383	1.23729	0.316682	1.999	1.05272	0.850624	1.17002	0.237401
171	514.902	278.025	272.185	85.0799	171.365	70.6071	183.375				-0.138497	0.493188	0.187215	0.685036	0.198052	-0.694011	0.162509	0.127642	0.169029					583.159	244.179	288.138	234.824	659.869	112.455					1.61173	1.20577	0.262635	2.02009	1.20653	0.916794	1.20392	0.245011
174	527.482	270.379	274.293	88.1938	174.27	67.1815	161.861				-0.117448	0.452124	0.196411	0.746707	0.218357	-0.708856	0.0261184	0.116202	0.173937					579.457	237.663	302.467	231.428	619.629	111.697					1.59515	1.1469	0.325426	1.97641	1.07197	0.903862	1.16995	0.232761
177	536.148	268.163	271.588	86.3442	178.546	69.1101	177.885				-0.102948	0.440226	0.184613	0.710075	0.248253	-0.700498	0.127703	0.129632	0.168586					569.502	239.96	298.834	238.698	609.243	120.204					1.55056	1.16766	0.309503	2.06991	1.03725	1.04887	1.19729	0.239649
180	518.811	262.254	288.677	84.164	174.645	74.4732	168.93				-0.131955	0.40849	0.259149	0.666896	0.220985	-0.677256	0.0709305	0.116748	0.162811					572.714	246.58	296.827	265.113	631.131	124.813					1.56495	1.22745	0.300708	2.40964	1.11044	1.12743	1.2901	0.281098
183	532.307	278.194	285.464	81.9309	200.762	58.753	157.973				-0.109376	0.494096	0.245135	0.622669	0.403573	-0.745383	0.00146915	0.130312	0.17617					576.834	228.843	291.176	263.284	621.27	114.887					1.5834	1.06723	0.275947	2.38612	1.07746	0.958239	1.22473	0.288396
186	565.527	253.374	252.289	78.2547	172.535	75.9851	161.062				-0.0537929	0.360799	0.100434	0.54986	0.20623	-0.670704	0.021055	0.0734116	0.146433					586.933	245.261	302.211	247.177	637.864	110.256					1.62863	1.21554	0.324302	2.17896	1.13295	0.879307	1.22661	0.258989
189	506.426	263.887	297.382	81.4011	170.741	61.4048	149.84				-0.152678	0.417261	0.297117	0.612176	0.193688	-0.733891	-0.0500869	0.0833695	0.168355					573.247	244.546	293.631	256.445	615.232	115.397					1.56734	1.20908	0.286707	2.29816	1.05727	0.966932	1.23091	0.273498
192	578.992	268.682	275.749	93.8428	184.312	56.5179	150.885				-0.0312649	0.443012	0.202761	0.858588	0.288567	-0.755069	-0.043464	0.13759	0.188875					554.526	249.486	288.854	265.872	632.764	114.24					1.48349	1.25371	0.265774	2.41939	1.1159	0.947223	1.24758	0.288695
195	627.465	283.517	290.912	89.7764	189.255	63.6131	152.658				0.0498366	0.522688	0.268898	0.778051	0.323122	-0.724321	-0.0322234	0.169436	0.181428					574.656	242.064	278.382	226.486	625.342	124.846					1.57365	1.18666	0.219883	1.91286	1.09108	1.12799	1.18535	0.232691
198	603.063	277.338	311.149	90.2846	183.777	66.7946	155.867				0.00900932	0.489502	0.357167	0.788116	0.284826	-0.710533	-0.011878	0.172316	0.180387					555.843	251.353	300.223	216.714	561.201	118.97					1.48939	1.27057	0.315592	1.78717	0.876598	1.02784	1.12786	0.209657
201	634.193	261.829	285.751	89.1328	190.828	52.4583	179.126				0.0610952	0.406209	0.246388	0.765305	0.334121	-0.772662	0.135571	0.168004	0.178924					534.919	247.775	279.059	221.455	577.445	113.177					1.39568	1.23825	0.22285	1.84815	0.930914	0.929102	1.09416	0.223103
204	617.245	286.717	301.498	72.8442	185.841	58.9137	170.936				0.0327383	0.539871	0.315073	0.442704	0.299254	-0.744686	0.08365	0.138372	0.162193					556.537	250.537	287.149	221.423	658.134	111.016					1.4925	1.2632	0.258303	1.84773	1.20073	0.892255	1.15912	0.222155
207	604.268	262.231	277.685	75.3293	188.259	81.5387	185.703				0.0110253	0.408366	0.211204	0.491922	0.31616	-0.646637	0.177264	0.138472	0.143823					575.089	250.24	298.408	235.381	621.805	127.199					1.57559	1.26052	0.30764	2.02726	1.07925	1.16811	1.23639	0.233312
210	628.865	273.368	303.924	75.3889	176.312	77.25	162.703				0.052179	0.468182	0.325653	0.493102	0.232637	-0.665223	0.0314556	0.133998	0.149846					538.596	241.964	281.366	258.631	645.897	121.335					1.41215	1.18576	0.232961	2.32627	1.15981	1.06816	1.23085	0.2746
213	626.892	264.496	266.819	84.5732	189.423	65.1756	196.249				0.0488786	0.420528	0.163811	0.675	0.324295	-0.717549	0.244123	0.165584	0.165429					576.154	248.762	289.635	244.092	611.616	109.328					1.58036	1.24716	0.269196	2.13929	1.04518	0.863495	1.19078	0.260272
216	654.677	267.984	307.677	83.5014	198.892	67.0506	184.016				0.0953677	0.439264	0.342023	0.653773	0.390496	-0.709424	0.16657	0.196867	0.166094					541.451	240.783	270.475	238.681	646.683	113.665					1.42494	1.17509	0.185234	2.0697	1.16244	0.937407	1.15913	0.251508
219	618.49	271.844	313.829	86.7154	196.868	59.744	190.038				0.0348215	0.459993	0.368859	0.717427	0.376351	-0.741088	0.204749	0.203016	0.176462					558.378	245.54	283.351	242.617	609.285	115.945					1.50075	1.21806	0.241658	2.12031	1.03739	0.976281	1.18241	0.253693
222	647.334	271.078	323.859	86.9323	202.448	77.2381	182.899				0.083081	0.45588	0.412609	0.721723	0.415359	-0.665274	0.159491	0.226124	0.168218					542.073	247.896	282.67	253.275	654.27	111.631					1.42772	1.23934	0.238674	2.25739	1.18781	0.902741	1.20895	0.269793
225	632.363	275.835	287.685	78.7778	201.711	75.8512	192.458				0.0580324	0.48143	0.254822	0.56022	0.410208	-0.671284	0.220091	0.187646	0.156964					563.096	243.012	291.077	246.977	625.782	112.197					1.52187	1.19522	0.275513	2.17639	1.09255	0.9124	1.19566	0.258572
228	646.645	288.532	315.932	76.7846	202.144	69.3899	191.831				0.0819285	0.549619	0.37803	0.520744	0.413236	-0.699286	0.216111	0.208626	0.163639					549.368	242.497	284.603	246.231	654.066	111.409					1.46039	1.19057	0.247146	2.16679	1.18713	0.89897	1.19183	0.258256
231	650.248	271.883	323.984	80.5366	197.807	64.4851	215.225				0.0879573	0.460203	0.413152	0.595054	0.382911	-0.720542	0.364421	0.226165	0.167961					524.953	248.093	277.939	266.78	657.281	111.874					1.35105	1.24112	0.217942	2.43107	1.19788	0.906886	1.22432	0.293647
234	661.611	256.741	326.59	81.393	205.095	73.4256	220.287				0.106969	0.378882	0.424521	0.612015	0.433868	-0.681796	0.396513	0.23871	0.163387					557.813	249.376	289.519	250.574	646.635	114.272					1.49821	1.25271	0.268687	2.22265	1.16228	0.947768	1.22539	0.262428
237	619.402	263.884	317.068	88.9675	205.905	78.878	214.117				0.0363463	0.417245	0.382987	0.762031	0.439524	-0.658167	0.357393	0.248194	0.17083					526.155	232.827	287.702	266.665	663.537	111.577					1.35643	1.10322	0.260727	2.4296	1.2188	0.901822	1.21177	0.289622
240	659.919	249.848	311.522	80.9539	216.161	69.4911	211.238				0.104138	0.341862	0.358796	0.603319	0.511232	-0.698847	0.339144	0.222806	0.164585					532.969	247.74	279.046	242.362	610.098	112.266					1.38695	1.23793	0.222796	2.11704	1.0401	0.913569	1.15306	0.253421
243	642.785	258.574	295.197	87.2127	218.962	73.8244	220.455				0.0754708	0.388723	0.287588	0.727276	0.530811	-0.680068	0.397577	0.246768	0.172136					543.625	253.489	285.82	234.285	660.293	105.469					1.43467	1.28987	0.252475	2.01316	1.20795	0.797713	1.16597	0.243388
246	662.095	275.117	310.604	87.3591	225.603	82.6935	220.935				0.107779	0.477573	0.354793	0.730176	0.577241	-0.641632	0.400615	0.286649	0.171057					559.77	247.54	287.387	225.131	637.644	106.935					1.50698	1.23613	0.259345	1.89543	1.13222	0.822704	1.14213	0.230279
249	641.205	269.53	332.414	76.6734	207.87	70.5089	223.582				0.0728261	0.447568	0.449921	0.518542	0.453269	-0.694436	0.417396	0.237869	0.164951					539.79	242.439	280.022	246.369	643.702	103.184					1.41749	1.19005	0.227069	2.16857	1.15247	0.758762	1.1524	0.265549
252	643.644	272.11	314.618	70.4133	203.853	74.1548	221.177				0.0769066	0.461421	0.372302	0.394559	0.425185	-0.678636	0.402154	0.207699	0.155395					513.296	244.735	282.712	266.909	649.814	109.452					1.29884	1.21079	0.238858	2.43274	1.17291	0.865598	1.20329	0.29245
255	627.758	262.798	323.934	70.7019	234.463	81.0833	222.286				0.0503279	0.411409	0.412933	0.400275	0.639181	-0.64861	0.409182	0.239243	0.161727					539.351	235.851	296.177	225.948	651.877	109.064					1.41553	1.13054	0.297861	1.90594	1.17981	0.858991	1.13144	0.219998
258	621.282	270.884	318.705	84.9919	199.31	72.5298	224.393				0.0394929	0.45484	0.390125	0.683293	0.39342	-0.685678	0.42254	0.242576	0.170371					536.371	243.411	289.31	238.28	632.888	109.035					1.40219	1.19883	0.26777	2.06454	1.11631	0.858492	1.15135	0.242679
261	625.923	251.032	306.49	73.9959	212.113	83.7976	235.549				0.0472568	0.348218	0.336847	0.465513	0.482926	-0.636847	0.493267	0.219597	0.154164					520.854	236.804	276.738	254.443	639.016	106.545					1.33269	1.13915	0.21268	2.27241	1.1368	0.816052	1.15163	0.275895
264	624.937	257.153	298.377	74.1463	198.435	96.872	232.299				0.0456079	0.381094	0.301462	0.468492	0.387304	-0.580187	0.472658	0.210919	0.142787					531.38	252.043	273.02	280.123	623.825	102.99					1.37983	1.27681	0.196388	2.60269	1.08601	0.755459	1.2162	0.327722
267	621.14	257.971	324.078	78.2466	215.134	80.1131	240.867				0.0392554	0.385487	0.413563	0.5497	0.504048	-0.652815	0.52698	0.252317	0.164435					524.654	257.576	289.19	246.745	624.627	106.997					1.34971	1.32679	0.267244	2.17341	1.08869	0.823765	1.1716	0.258531
270	618.381	245.569	316.012	71.7249	221.117	76.3958	214.042				0.034638	0.318881	0.37838	0.420535	0.545877	-0.668924	0.356917	0.198043	0.15593					532.683	250.48	282.421	275.188	610.927	99.0201					1.38567	1.26268	0.237581	2.53921	1.04287	0.687793	1.19264	0.318584
273	615.282	262.47	324.287	77.351	222.953	81.4137	230.029				0.0294541	0.409647	0.414474	0.531962	0.558716	-0.647178	0.458268	0.250763	0.163612					511.35	246.606	268.576	257.868	583.24	102.787					1.29012	1.22769	0.176915	2.31645	0.950294	0.752	1.11891	0.290153
276	603.726	250.055	338.839	69.1247	230.735	100.226	218.861				0.0101184	0.342971	0.477948	0.369038	0.613117	-0.565651	0.38747	0.233573	0.150116					502.466	254.344	273.418	261.603	555.076	101.858					1.25034	1.29759	0.198129	2.36449	0.856117	0.73617	1.11714	0.297995
279	593.037	268.793	308.396	72.8184	226.983	94.3839	217.297				-0.00776526	0.44361	0.345159	0.442193	0.586888	-0.59097	0.377556	0.228096	0.153029					504.473	243.393	260.779	231.757	603.922	95.9186					1.25933	1.19867	0.142744	1.98065	1.01945	0.634929	1.03929	0.253487
282	580.135	275.254	312.321	82.1274	219.586	91.5	206.597				-0.0293515	0.47831	0.362282	0.62656	0.535174	-0.603467	0.309725	0.23989	0.161625					521.606	245.856	268.707	262.274	639.073	105.685					1.33606	1.22091	0.177488	2.37313	1.13699	0.80139	1.17433	0.29437
285	596.992	254.707	311.313	76.187	232.151	94.9167	201.313				-0.00114832	0.367954	0.357885	0.508909	0.623017	-0.588661	0.276225	0.220597	0.153746					511.617	251.903	276.239	237.499	565.632	93.17					1.29132	1.27554	0.210491	2.05449	0.891413	0.588079	1.05189	0.26213
288	607.747	271.004	349.179	73.126	223.909	102.539	191.899				0.0168461	0.455484	0.523046	0.448285	0.565395	-0.555629	0.216547	0.238568	0.151121					505.624	251.379	263.347	207.724	487.27	93.7614					1.26448	1.2708	0.154	1.67155	0.62938	0.598159	0.931396	0.229534
291	591.179	262.721	308.265	70.8157	222.879	104.658	195.289				-0.0108741	0.410998	0.344589	0.402528	0.558197	-0.546446	0.238036	0.199575	0.14124					535.76	251.992	265.947	263.518	472.389	99.425					1.39945	1.27634	0.165394	2.38912	0.579618	0.694695	1.0841	0.320917
294	584.644	239.34	308.673	73.5556	235.157	103.896	182.949				-0.0218088	0.285422	0.346367	0.456793	0.644035	-0.549748	0.159805	0.188695	0.1467					515.378	258.45	284.066	245.859	531.292	91.9479					1.30817	1.33468	0.24479	2.16202	0.776584	0.567248	1.06558	0.279224
297	599.553	263.253	323.715	74.164	253.081	81.9077	189.754				0.0031371	0.413854	0.411978	0.468843	0.769343	-0.645038	0.202946	0.232152	0.171319					494.312	245.627	272.597	197.104	564.841	97.7605					1.21382	1.21884	0.194534	1.53497	0.888769	0.666324	0.952877	0.194848
300	598.102	262.347	313.456	77.0881	227.541	102.577	188.904				0.000708366	0.408987	0.36723	0.526755	0.590792	-0.555461	0.197559	0.21951	0.149516					522.925	243.637	276.34	241.621	527.119	97.862					1.34196	1.20087	0.210936	2.1075	0.762629	0.668054	1.04866	0.268254
303	586.097	270.597	320.41	73.6192	235.798	98.2173	181.811				-0.0193774	0.453296	0.397561	0.458053	0.648518	-0.574357	0.152595	0.216613	0.155764					505.354	239.88	273.991	207.844	523.621	94.6545					1.26327	1.16693	0.200641	1.6731	0.750933	0.613382	0.94471	0.214661
306	598.406	271.973	299.53	76.1355	227.093	118.491	180.104				0.00121834	0.460684	0.306489	0.507889	0.58766	-0.486496	0.141769	0.21703	0.141128					505.766	236.579	270.367	169.377	453.434	95.8894					1.26512	1.13711	0.184762	1.17837	0.516235	0.634431	0.819338	0.178639
309	573.345	277.579	282.819	77.935	231.195	125.497	170.433				-0.0407126	0.490798	0.2336	0.543529	0.616338	-0.456135	0.08046	0.209697	0.144678					502.577	246.279	282.457	160.191	441.571	88.3812					1.25083	1.22473	0.237741	1.06023	0.476567	0.506454	0.792759	0.178696
312	619.161	284.483	304.745	74.6965	236.945	139.069	177.233				0.0359442	0.527873	0.329236	0.479389	0.656534	-0.39732	0.123571	0.250746	0.136469					495.679	246.435	272.669	179.09	446.842	96.5923					1.21994	1.22614	0.19485	1.30329	0.494194	0.646412	0.847471	0.189828
315	591.955	264.773	329.801	73.3591	239.408	123.795	185.668				-0.0095761	0.422018	0.438526	0.452901	0.673752	-0.463513	0.177041	0.241593	0.143691					489.023	249.789	256.269	156.928	427.395	99.936					1.19013	1.25644	0.122983	1.01827	0.429163	0.703405	0.786731	0.183696
318	576.006	271.59	330.613	70.9052	238.518	126.33	184.511				-0.0362599	0.458628	0.442064	0.404301	0.667533	-0.452523	0.169709	0.236207	0.143025					491.151	249.564	265.312	180.333	410.144	95.457					1.19966	1.25441	0.162611	1.31927	0.371477	0.627061	0.822416	0.204341
321	611.581	272.419	342.333	71.6856	239.195	141.449	183.965				0.0232606	0.463083	0.493188	0.419757	0.672267	-0.387002	0.166246	0.2644	0.135789					519.166	233.886	265.529	180.19	428.415	89.958					1.32513	1.11278	0.163562	1.31744	0.432575	0.53333	0.814136	0.204231
324	612	287.749	312.141	70.4133	229.981	135.944	170.257				0.0239624	0.545413	0.361494	0.394559	0.607847	-0.410863	0.0793461	0.228823	0.134737					489.855	248.732	271.687	164.582	372.727	86.6691					1.19386	1.24689	0.190546	1.11671	0.24636	0.477271	0.745272	0.2016
327	621.468	287.079	341.416	74.0041	256.11	145.991	177.593				0.0398031	0.541819	0.489185	0.465676	0.790525	-0.36732	0.12585	0.297934	0.146844					476.616	252.058	276.122	180.39	420.502	94.4616					1.13457	1.27694	0.209979	1.32001	0.406116	0.610094	0.826284	0.195364
330	639.344	298.354	306.578	74.29	262.369	156.295	178.588				0.0697121	0.602371	0.337232	0.471338	0.834283	-0.322668	0.132159	0.30349	0.144458					480.431	242.673	276.771	180.714	426.02	92.3245					1.15165	1.19216	0.212823	1.32418	0.424567	0.573667	0.813174	0.190448
333	587.144	296.587	337.211	68.229	250.015	138.643	175.351				-0.0176259	0.59288	0.470845	0.351298	0.74791	-0.399165	0.111641	0.265397	0.149207					489.501	250.928	256.195	171.917	430.725	96.3693					1.19227	1.26673	0.12266	1.21104	0.440301	0.642611	0.812602	0.196015
336	598.882	289.263	351.241	78.9621	240.73	149.935	198.008				0.00201459	0.553546	0.532042	0.563871	0.683	-0.350231	0.255272	0.319931	0.141863					511.469	247.817	260.215	169.535	417.613	92.5905					1.29066	1.23863	0.140276	1.1804	0.396454	0.578201	0.804103	0.202074
339	624.955	302.262	327.787	77.8266	240.968	150.131	199				0.0456376	0.623358	0.429741	0.541382	0.684662	-0.349379	0.261561	0.319566	0.139114					518.654	249.353	256.562	156.43	413.465	89.8665					1.32284	1.2525	0.124269	1.01185	0.382583	0.531771	0.770969	0.201721
342	593.652	301.736	330.743	74.9797	235.495	136.67	196.752				-0.00673711	0.620532	0.442634	0.484998	0.646396	-0.407716	0.247313	0.289631	0.144278					524.113	240.387	260.435	158.706	325.796	93.075					1.34729	1.17151	0.141237	1.04113	0.0894264	0.586459	0.729508	0.219875
345	606.487	308.916	336.412	82.7724	255.862	147.768	204.137				0.0147385	0.659098	0.467359	0.639335	0.788788	-0.35962	0.29413	0.35769	0.15463					502.613	243.567	248.427	162.475	351.078	93.0384					1.25099	1.20024	0.0886185	1.08961	0.173968	0.585836	0.731543	0.213165
348	603.455	300.889	321.472	88.29	253.909	132.958	201.5				0.00966503	0.615984	0.402195	0.748613	0.775132	-0.4238	0.27741	0.3436	0.164221					495.205	237.449	259.254	152.471	370.97	99.7541					1.21782	1.14497	0.136064	0.960944	0.240486	0.700304	0.733431	0.187679
351	616.748	303.473	307.37	81.3062	249.828	165.935	199.762				0.0319071	0.629861	0.340683	0.610296	0.746603	-0.280891	0.266392	0.334979	0.138708					495.323	260.81	259.93	165.804	321.866	96.3254					1.21835	1.356	0.139024	1.13242	0.0762855	0.641862	0.760656	0.228839
354	599.24	307.228	313.237	75.2019	235.571	177.622	207.473				0.00261357	0.650033	0.366276	0.489399	0.64693	-0.230242	0.315275	0.32004	0.124419					428.777	239.525	258.287	155.909	361.207	88.9095					0.920315	1.16372	0.131828	1.00516	0.20784	0.515459	0.657387	0.177473
357	609.987	297.071	315.37	82.206	206.257	175.789	197.46				0.0205945	0.59548	0.375577	0.628117	0.441988	-0.238186	0.251799	0.296481	0.118602					443.325	251.271	264.625	158.629	325.574	99.2633					0.985467	1.26983	0.1596	1.04014	0.0886857	0.691939	0.705944	0.198954
360	586.166	293.432	332.385	69.7629	236.932	175.735	215.567				-0.0192614	0.575937	0.449798	0.381677	0.656445	-0.238419	0.366588	0.310395	0.122261					470.458	253.884	267.046	132.442	351.764	92.8199					1.10699	1.29344	0.170207	0.703345	0.176263	0.582111	0.672059	0.189913
363	610.207	299.041	313.47	70.7182	247.639	179.378	202.377				0.0209616	0.606058	0.367292	0.400597	0.7313	-0.222632	0.28297	0.312364	0.123882					453.423	258.325	264.351	146.174	349.85	94.9872					1.03069	1.33355	0.158399	0.879954	0.169862	0.619053	0.698586	0.193568
366	606.679	298.6	308.588	70.2832	242.662	184.018	205.85				0.0150596	0.603691	0.345999	0.391982	0.696507	-0.202524	0.304986	0.307957	0.118856					446.387	256.076	264.896	159.812	338.894	90.2532					0.999184	1.31324	0.160788	1.05535	0.133226	0.538362	0.700025	0.202481
369	619.418	287.932	311.53	72.729	248.597	186.598	189.342				0.0363732	0.546398	0.358831	0.440422	0.737994	-0.191341	0.200334	0.304144	0.11917					442.383	263.01	264.883	148.825	297.947	97.5923					0.98125	1.37587	0.16073	0.914051	-0.00369644	0.663457	0.681944	0.213472
372	607.06	266.283	332.201	76.5556	268.639	186.211	216.636				0.0156965	0.430129	0.448992	0.516209	0.878116	-0.193018	0.373363	0.352784	0.131825					427.619	252.738	249.013	148.723	274.535	87.7011					0.91513	1.28308	0.0911882	0.912736	-0.0819834	0.494862	0.602503	0.215926
375	614.168	229.91	324.747	68.6978	234.469	186.607	200.974				0.0275892	0.234781	0.41648	0.360583	0.639226	-0.191303	0.274078	0.251633	0.101939					425.617	257.362	264.542	129.457	310.811	92.4314					0.906163	1.32485	0.159237	0.664956	0.0393201	0.575489	0.61167	0.194232
378	610.247	240.446	321.663	73.0664	229.919	201.577	210.286				0.021029	0.291367	0.403027	0.447104	0.607417	-0.126426	0.333108	0.282375	0.0957949					390.929	234.75	256.589	144.805	302.065	92.4397					0.75081	1.12059	0.124384	0.862347	0.0100754	0.575631	0.573973	0.176383
381	621.266	253.912	300.116	73.6219	240.558	224.36	202.08				0.0394658	0.363685	0.309047	0.458106	0.681797	-0.0276931	0.281086	0.300785	0.0913547					406.234	244.81	238.09	138.701	283.732	83.1216					0.819355	1.21146	0.0433217	0.78384	-0.0512309	0.416804	0.537259	0.199978
384	611.153	188.051	294.932	79.9797	232.323	182.821	219.473				0.0225455	0.0099643	0.286432	0.584024	0.62422	-0.207709	0.391349	0.244404	0.118678					400.827	236.987	246.486	139.393	273.626	88.7806					0.79514	1.1408	0.0801125	0.792748	-0.0850247	0.513262	0.539506	0.190858
387	614.716	251.147	305.373	76.0813	234.524	193.458	200.759				0.0285068	0.348839	0.331977	0.506815	0.639612	-0.161612	0.272711	0.280978	0.103109					377.489	239.156	233.781	138.034	298.878	86.9717					0.690618	1.16039	0.024439	0.775271	-0.000582272	0.482429	0.522094	0.184603
390	617.927	251.289	327.759	72.29	237.306	215.452	207.241				0.0338797	0.349599	0.429618	0.431727	0.659057	-0.0662963	0.313806	0.307342	0.0939023					360.4	218.433	241.601	148.768	263.984	90.4168					0.614083	0.97319	0.058708	0.913322	-0.117264	0.541151	0.497198	0.181214
393	619.814	227.325	331.916	76.9309	205.357	200.199	202.347				0.0370371	0.220896	0.447748	0.523642	0.435694	-0.132398	0.282777	0.259342	0.0901531					359.885	222.791	243.322	148.876	271.646	94.2569					0.611774	1.01256	0.0662499	0.9147	-0.0916446	0.606605	0.520041	0.182056
396	607.193	187.247	323.197	78.2629	222.025	199.262	188.931				0.0159204	0.00564893	0.409719	0.550023	0.55223	-0.136461	0.197731	0.22783	0.105786					371.138	198.28	231.568	150.583	281.847	90.3757					0.662175	0.791144	0.0147416	0.936664	-0.0575328	0.54045	0.481274	0.168086
399	622.977	176.76	308.313	65.3984	199.503	195.232	187.435				0.0423291	-0.0506736	0.3448	0.295237	0.394771	-0.153925	0.188242	0.15154	0.0793774					346.138	194.513	227.532	148.313	282.059	94.9717					0.55021	0.757112	-0.00294263	0.90747	-0.0568232	0.618789	0.462302	0.16363
402	622.742	227.186	321.757	65.6843	194.488	201.131	151.872				0.0419351	0.220151	0.403438	0.300899	0.359711	-0.128361	-0.0372056	0.165795	0.0784316					342.527	193.776	218.878	157.273	269.094	91.5932					0.534036	0.750452	-0.0408675	1.0227	-0.100179	0.561202	0.454557	0.180851
405	607.385	231.225	312.355	67.1856	180.989	201.054	175.775				0.0162416	0.241843	0.362431	0.330633	0.265337	-0.128696	0.114325	0.171731	0.0677922					352.053	205.448	229.503	151.733	265.588	92.2203					0.576698	0.855889	0.00569219	0.951451	-0.111901	0.571891	0.474953	0.17856
408	608.971	179.312	294.048	75.752	207.633	206.732	177.284				0.0188942	-0.0369676	0.282578	0.500293	0.451606	-0.104087	0.123894	0.176602	0.0904595					331.106	202.364	226.997	135.447	252.725	95.9168					0.482888	0.828034	-0.00528834	0.741993	-0.154913	0.634898	0.421269	0.166502
411	620.01	190.081	224.335	81.332	180.955	197.827	158.794				0.0373637	0.0208684	-0.0214951	0.610807	0.265099	-0.142678	0.00667451	0.110949	0.0951053					348.765	187.791	219.579	139.042	242.913	91.5704					0.561972	0.696394	-0.0377922	0.788236	-0.187726	0.560814	0.396983	0.166103
414	616.726	204.708	292.853	75.1965	203.106	185.449	160.144				0.0318693	0.0994268	0.277367	0.489292	0.41996	-0.19632	0.0152322	0.162404	0.0922929					336.805	205.05	211.621	147.906	214.796	88.8336					0.508408	0.852294	-0.0726654	0.90223	-0.281746	0.514165	0.403781	0.197458
417	612.052	212.539	259.954	76.8577	177.134	212.205	148.398				0.0240487	0.141484	0.133865	0.522192	0.238382	-0.0803678	-0.0592316	0.131482	0.0782216					334.611	206.575	223.092	138.68	217.963	82.3995					0.498586	0.866077	-0.0223989	0.78358	-0.271156	0.404496	0.376531	0.182544
420	606.869	200.555	308.01	71.4959	181.234	243.661	140.727				0.0153781	0.0771212	0.343477	0.416	0.267044	0.0559497	-0.107862	0.152444	0.0724765					323.341	193.686	210.294	149.453	229.593	86.341					0.448109	0.749639	-0.07848	0.922126	-0.232266	0.471679	0.380135	0.185171
423	601.761	212.747	332.97	73.5813	195.431	211.571	132.605				0.00683156	0.142602	0.452347	0.457302	0.366301	-0.0831154	-0.159348	0.168989	0.0976755					318.282	195.275	213.012	146.544	240.998	81.926					0.425455	0.763994	-0.0665726	0.884713	-0.194127	0.396425	0.368315	0.176329
426	613.874	225.788	308.99	80.0325	176.52	209.851	143.543				0.0270982	0.212639	0.347751	0.58507	0.234092	-0.0905702	-0.090008	0.175153	0.0932917					308.995	185.605	218.244	136.876	248.041	82.2038					0.383863	0.676641	-0.043644	0.760367	-0.170578	0.40116	0.334635	0.153123
429	609.727	193.267	317.261	82.5474	172.448	235.562	137.361				0.02016	0.0379817	0.383828	0.634879	0.205622	0.0208546	-0.129199	0.167732	0.0993686					304.209	185.93	225.139	150.664	220.27	84.3218					0.362427	0.67958	-0.0134311	0.937705	-0.263441	0.437262	0.356684	0.179807
432	591.644	211.595	299.904	68.8916	169.212	220.586	140.329				-0.0100968	0.136416	0.308118	0.364421	0.183001	-0.0440476	-0.110383	0.118204	0.0683582					315.344	189.183	212.045	139.549	232.647	76.5503					0.412295	0.708964	-0.0708087	0.79475	-0.222051	0.304797	0.321324	0.16653
435	602.816	210.905	301.693	65.519	159.163	233.738	132.628				0.00859639	0.132706	0.315922	0.297626	0.112747	0.0129482	-0.159206	0.103049	0.0636145					322.158	184.317	216.016	150.985	225.062	76.0951					0.442811	0.665009	-0.0534094	0.941827	-0.247415	0.297038	0.340977	0.180745
438	600.606	226.032	290.177	64.1436	169.524	204.402	138.466				0.00489925	0.21395	0.265692	0.270385	0.185183	-0.114186	-0.122191	0.100533	0.0656492					309.997	186.231	211.194	149.958	195.165	80.9506					0.388347	0.682295	-0.0745357	0.928628	-0.347387	0.3798	0.326191	0.19242
441	607.627	205.646	264.877	64.1287	163.928	192.771	138.918				0.0166464	0.104464	0.155342	0.27009	0.146056	-0.164591	-0.119326	0.058383	0.059175					322.225	185.925	212.955	145.552	223.661	79.4717					0.443113	0.67953	-0.0668202	0.871957	-0.252099	0.354592	0.338379	0.175611
444	596.498	219.012	256.958	54.5108	171.437	235.149	139.585				-0.00197401	0.176247	0.120798	0.0796045	0.198557	0.0190618	-0.115102	0.0681701	0.0415481					303.987	182.78	208.264	152.01	221.672	81.0475					0.361434	0.651126	-0.0873764	0.955013	-0.258751	0.381451	0.333816	0.184223
447	581.118	219.321	252.586	56.7073	178.951	214.274	121.837				-0.0277081	0.177907	0.10173	0.123107	0.251088	-0.071404	-0.227613	0.0467295	0.0622187					330.562	182.439	210.766	143.474	229.551	74.2157					0.480452	0.648046	-0.0764125	0.845233	-0.232407	0.265004	0.321652	0.170737
450	570.595	215.487	326.118	62.1043	165.972	215.67	135.917				-0.0453137	0.157317	0.422462	0.229996	0.16035	-0.065355	-0.138354	0.103015	0.0744849					314.304	181.261	204.383	157.713	214.137	75.5439					0.407638	0.637402	-0.104385	1.02836	-0.283947	0.287643	0.328784	0.196268
453	586.85	183.042	304.942	62.3726	172.726	200.696	131.35				-0.0181171	-0.016936	0.330094	0.23531	0.207566	-0.130244	-0.167307	0.0629094	0.0732387					319.702	183.867	212.971	140.469	236.062	71.3272					0.431812	0.66094	-0.0667492	0.806585	-0.210632	0.215769	0.306287	0.16395
456	590.282	139.171	329.733	62.6355	177.083	198.071	134.329				-0.0123744	-0.252556	0.438228	0.240517	0.238025	-0.14162	-0.14842	0.0516855	0.0968394					326.494	169.188	206.347	147.666	244.304	73.9214					0.46223	0.528345	-0.0957772	0.899147	-0.183072	0.259987	0.31181	0.166153
459	568.615	215.39	318.462	66.0176	153.21	208.208	119.414				-0.0486277	0.156797	0.389066	0.3075	0.0711265	-0.09769	-0.242976	0.0764566	0.0853005					304.289	186.876	207.287	156.585	241.913	68.2441					0.362785	0.688124	-0.0916599	1.01386	-0.19107	0.163218	0.324209	0.189201
462	589.179	195.098	336.942	57.5881	155.917	212.551	129.308				-0.0142204	0.0478154	0.469671	0.140551	0.0900517	-0.0788718	-0.18025	0.0678212	0.0782938					319.091	178.619	203.885	142.881	246.961	76.2697					0.429078	0.613532	-0.106568	0.837599	-0.174188	0.300014	0.316578	0.16253
465	595.848	216.869	310.048	59.977	152.257	210.521	136.457				-0.00306156	0.164737	0.352367	0.187864	0.0644618	-0.0876683	-0.134931	0.0776813	0.0644408					313.119	180.396	212.821	157.444	248.117	74.1837					0.40233	0.629589	-0.0674074	1.0249	-0.170323	0.264458	0.347257	0.181534
468	570.524	208.98	313.994	55.7575	167.098	218.396	125.861				-0.0454325	0.122369	0.369578	0.104296	0.168217	-0.0535405	-0.202104	0.0661975	0.0700065					332.794	183.369	201.462	144.615	265.019	72.9881					0.490448	0.656441	-0.117182	0.859902	-0.113805	0.244079	0.336647	0.165041
471	588.847	219.698	306.817	53.2764	155.59	216.089	127.626				-0.0147762	0.179933	0.338275	0.0551568	0.0877656	-0.0635362	-0.190913	0.0559863	0.0647913					330.127	190.011	200.002	151.617	269.863	70.5466					0.478502	0.716444	-0.12358	0.949955	-0.0976074	0.202464	0.354363	0.178608
474	601.356	223.676	273.042	51.6328	174.62	194.229	132.891				0.00615411	0.201299	0.190954	0.0226047	0.220807	-0.158271	-0.157534	0.0465735	0.0619087					318.99	179.78	214.875	150.899	258.451	70.1188					0.428623	0.624026	-0.0584093	0.940722	-0.135767	0.195172	0.332394	0.16883
477	583.098	221.685	327.412	57.8577	181.764	224.94	126.24				-0.0243941	0.190605	0.428103	0.145891	0.270755	-0.0251778	-0.199704	0.112297	0.0797363					346.761	190.726	208.098	147.393	249.646	69.351					0.553	0.722904	-0.088106	0.895636	-0.16521	0.182085	0.350051	0.179217
480	579.118	218.207	299.548	58.9065	181.369	224.324	127.494				-0.0310544	0.171923	0.306568	0.166663	0.267994	-0.0278478	-0.191754	0.0946417	0.068825					338.958	187.072	213.18	161.091	264.342	72.8035					0.518051	0.689892	-0.065836	1.0718	-0.116069	0.240933	0.389796	0.187732
483	564.753	222.146	333.795	66.1301	173.017	206.381	127.067				-0.0550882	0.193081	0.455947	0.309729	0.2096	-0.105609	-0.194458	0.116172	0.0903119					345.647	201.061	206.891	160.448	271.49	71.9488					0.548009	0.81626	-0.0933943	1.06353	-0.0921662	0.226364	0.411434	0.19583
486	576.429	227.689	331.719	59.2927	176.82	210.848	130.979				-0.035553	0.222852	0.44689	0.174312	0.236184	-0.0862495	-0.169657	0.112683	0.082252					336.374	185.426	203.348	159.365	269.34	77.6079					0.506479	0.675022	-0.10892	1.04961	-0.0993549	0.322823	0.390942	0.184642
489	575.965	209.656	327.606	59.1084	177.972	229.812	135.882				-0.0363301	0.126001	0.428952	0.170661	0.244245	-0.00406411	-0.138577	0.112984	0.0723482					353.406	199.404	201.949	164.624	273.913	73.362					0.582758	0.801298	-0.11505	1.11724	-0.084065	0.250452	0.425439	0.202233
492	606.023	229.084	313.327	56.6721	183.023	185.357	130.751				0.0139613	0.230342	0.36667	0.12241	0.279557	-0.19672	-0.171105	0.0921592	0.0830028					351.2	203.367	209.043	167.679	277.175	65.277					0.57288	0.837091	-0.083965	1.15653	-0.0731568	0.112644	0.420336	0.21067
495	575.587	225.809	302.691	52.1992	196.062	221.643	143.832				-0.0369616	0.212755	0.320276	0.0338225	0.37071	-0.0394686	-0.0881746	0.110423	0.071006					347.385	205.758	200.787	164.668	275.964	68.7395					0.555794	0.858696	-0.120141	1.11781	-0.077205	0.171662	0.41777	0.208042
498	582.494	229.783	305.849	56.2046	178.229	223.28	142.577				-0.0254062	0.234098	0.334053	0.113151	0.246041	-0.0323748	-0.0961345	0.110489	0.0627186					342.888	202.69	208.593	173.484	279.941	63.4616					0.535653	0.830981	-0.0859338	1.23119	-0.0639076	0.0817003	0.421615	0.21946
501	569.334	211.828	304.602	54.3875	179.688	218.533	136.553				-0.0474241	0.137666	0.328614	0.0771625	0.256238	-0.0529473	-0.134324	0.0807121	0.0647421					357.24	206.336	208.609	159.421	275.416	65.5859					0.59993	0.863918	-0.0858659	1.05032	-0.0790361	0.117909	0.411196	0.201864
504	609.115	228.649	313.564	58.0298	192.675	199.56	145.915				0.0191345	0.228005	0.367704	0.149299	0.347035	-0.135171	-0.0749694	0.12872	0.0753077					370.034	212.518	206.088	159.376	292.83	74.1344					0.657231	0.919754	-0.0969109	1.04975	-0.0208072	0.263618	0.462105	0.198153
507	630.043	221.049	306.335	57.3035	182.388	195.069	143.096				0.0541517	0.18719	0.336172	0.134915	0.275118	-0.154634	-0.0928436	0.105724	0.0688623					383.659	212.563	205.861	165.201	268.19	72.6298					0.718252	0.920169	-0.0979087	1.12467	-0.1032	0.237972	0.466658	0.215848
510	623.171	234.146	314.04	60.1016	188.834	219.06	137.11				0.042653	0.257529	0.369779	0.190332	0.320183	-0.0506643	-0.130789	0.142718	0.0724923					363.027	208.383	205.297	168.985	284.083	66.9159					0.62585	0.882408	-0.100377	1.17333	-0.0500572	0.140579	0.445288	0.215227
513	618.716	228.237	327.096	59.2764	206.452	191.914	144.32				0.0351993	0.225794	0.426728	0.173989	0.443353	-0.168306	-0.085086	0.150239	0.0898037					383.879	217.732	210.382	173.227	293.877	69.5695					0.719234	0.966863	-0.0780961	1.22789	-0.0173068	0.185809	0.500733	0.223336
516	620.052	232.386	325.735	59.0813	197.355	182.595	150.963				0.0374338	0.248076	0.42079	0.170125	0.37975	-0.208689	-0.0429676	0.143502	0.0865208					378.931	212.653	216.994	166.681	307.71	73.553					0.697077	0.920975	-0.0491224	1.1437	0.0289493	0.253708	0.499215	0.201204
519	620.973	235.173	306.028	52.2168	216.386	198.06	150.891				0.0389748	0.263047	0.334832	0.034171	0.512805	-0.141672	-0.0434234	0.142676	0.0881588					392.168	233.665	217.098	173.354	299.994	70.6353					0.756358	1.11079	-0.0486641	1.22952	0.00314784	0.203976	0.542521	0.230627
522	631.729	232.322	308.014	49.3144	191.289	205.792	140.35				0.0569718	0.247735	0.343495	-0.023312	0.337342	-0.108163	-0.110252	0.106259	0.0758706					386.991	224.648	222.465	176.779	304.387	63.7139					0.733172	1.02933	-0.0251482	1.27356	0.0178379	0.0860008	0.519126	0.231691
525	631.024	238.25	291.253	48.4201	205.622	180.872	150.104				0.0557925	0.27957	0.270386	-0.0410239	0.43755	-0.216157	-0.0484164	0.105386	0.0871286					382.171	215.651	227.007	177.685	291.758	70.0832					0.711588	0.948058	-0.00524409	1.28523	-0.0243911	0.194565	0.5183	0.222384
528	623.542	226.698	324.297	55.1355	207.686	203.051	150.653				0.0432736	0.217528	0.414518	0.0919769	0.451977	-0.120042	-0.0449322	0.150614	0.0832947					388.739	235.934	223.541	179.603	312.821	60.4433					0.741003	1.13128	-0.0204336	1.30988	0.0460393	0.0302535	0.539671	0.244994
531	621.36	225.996	325.681	60.9038	210.454	222.857	150.995				0.0396224	0.213756	0.420553	0.20622	0.471333	-0.0342067	-0.0427654	0.182073	0.0786421					400.393	235.336	218.023	183.999	319.807	64.0027					0.793196	1.12589	-0.0446115	1.36643	0.0693994	0.0909233	0.56687	0.24839
534	608.468	224.824	307.87	59.3198	217.287	187.289	145.617				0.0180523	0.207462	0.342864	0.174848	0.519099	-0.188349	-0.076863	0.142445	0.0926215					379.943	240.013	215.689	175.519	306.568	68.7294					0.701607	1.16813	-0.0548384	1.25736	0.0251309	0.17149	0.544813	0.237336
537	617.24	239.264	346.331	53.416	214.064	209.44	163.003				0.0327301	0.285019	0.510627	0.0579216	0.496567	-0.09235	0.0333594	0.189125	0.0915793					400.856	234.911	222.719	196.378	332.53	73.1655					0.795268	1.12204	-0.0240352	1.52563	0.111947	0.247103	0.62966	0.252608
540	623.64	220.809	304.161	54.3198	205.023	195.58	152.601				0.0434382	0.185901	0.326687	0.0758216	0.433364	-0.152415	-0.0325879	0.125744	0.0772034					424.483	233.087	230.356	192.676	298.317	73.6764					0.901086	1.10557	0.00942921	1.47803	-0.0024602	0.255811	0.624577	0.254542
543	614.1	218.208	300.205	56.8049	218.845	216.464	146.72				0.0274759	0.171931	0.309432	0.12504	0.529994	-0.0619111	-0.0698655	0.147442	0.0815229					403.864	242.38	234.976	185.928	313.125	70.4616					0.80874	1.18951	0.0296765	1.39124	0.0470565	0.201015	0.611206	0.245398
546	632.708	212.273	317.09	49.3062	241.17	193.327	164.495				0.0586099	0.140056	0.383084	-0.0234744	0.686072	-0.162179	0.0428179	0.160712	0.107834					407.757	238.031	229.968	199.357	340.03	66.2322					0.826173	1.15023	0.00772897	1.56394	0.137023	0.128925	0.635671	0.262203
549	613.003	225.114	307.506	49.378	205.813	208.336	167.514				0.0256408	0.209022	0.341278	-0.0220523	0.438886	-0.0971353	0.0619582	0.1368	0.0749922					405.515	251.287	229.098	187.253	344.728	65.8857					0.816136	1.26997	0.00391703	1.40827	0.152736	0.123019	0.629009	0.253423
552	615.307	228.946	297.032	49.958	233.098	202.101	159.561				0.0294946	0.229604	0.295593	-0.0105653	0.629638	-0.124156	0.0115356	0.151592	0.0966345					423.022	242.157	242.567	195.361	324.994	69.7468					0.894539	1.1875	0.0629406	1.51255	0.0867452	0.188831	0.655518	0.256066
555	634.31	242.345	321.48	48.878	214.391	204.723	142.62				0.0612896	0.301566	0.40223	-0.031955	0.498853	-0.112793	-0.0958613	0.14619	0.0949529					405.722	234.718	226.546	185.887	354.144	70.0859					0.817062	1.1203	-0.00726377	1.3907	0.184219	0.194611	0.616605	0.234334
558	612.889	239.551	293.715	52.3509	224.605	187.104	150.957				0.0254493	0.286556	0.281125	0.0368269	0.570264	-0.189149	-0.0430082	0.138295	0.0966214					417.469	239.464	236.95	198.73	356.997	65.3144					0.869669	1.16317	0.0383249	1.55588	0.19376	0.113281	0.655682	0.258354
561	620.823	233.48	293.347	56.2873	224.766	198.804	161.327				0.0387238	0.253951	0.279522	0.114789	0.571392	-0.138447	0.0227363	0.163238	0.0868696					417.75	242.728	237.513	196.657	345.972	66.3236					0.870928	1.19266	0.0407928	1.52922	0.156894	0.130483	0.653496	0.258227
564	620.226	231.543	295.293	63.332	221.565	201.738	156.498				0.0377253	0.243551	0.288009	0.254311	0.549009	-0.12573	-0.00787782	0.177	0.0854041					422.497	239.97	233.476	188.029	333.521	75.4918					0.89219	1.16774	0.0231016	1.41826	0.11526	0.286755	0.650551	0.239988
567	650.342	227.094	310.006	52.6721	233.883	216.777	177.385				0.0881138	0.219654	0.352183	0.0431884	0.635129	-0.0605568	0.124533	0.200321	0.0877736					417.994	251.898	231.008	203.388	341.767	68.574					0.872024	1.27549	0.0122876	1.61579	0.142835	0.168841	0.681212	0.274642
570	644.968	233.383	300.1	57.2791	250.388	185.815	150.799				0.079122	0.253431	0.308977	0.134432	0.750522	-0.194733	-0.0440111	0.183963	0.114463					418.887	240.07	230.941	186.768	358.325	73.9022					0.876021	1.16865	0.0119953	1.40204	0.1982	0.25966	0.652761	0.23446
573	632.543	221.043	283.094	47.4986	226.998	201.845	153.155				0.0583345	0.187159	0.2348	-0.0592745	0.586993	-0.125266	-0.0290733	0.121953	0.0918157					409.807	242.909	234.089	192.644	338.974	73.0823					0.835356	1.19429	0.02579	1.47761	0.133492	0.245685	0.652038	0.247347
576	631.842	226.407	302.9	58.3767	237.656	184.446	171.633				0.0571606	0.215968	0.321186	0.15617	0.661507	-0.200667	0.0880655	0.185627	0.100222					426.345	250.636	242.352	196.251	338.484	76.3382					0.909424	1.26409	0.0619971	1.524	0.131854	0.301181	0.698758	0.253635
579	633.256	241.266	306.813	60.7751	224.187	192.107	166.04				0.0595275	0.295768	0.338257	0.203671	0.56734	-0.167468	0.0526106	0.192815	0.0898896					415.829	251.489	237.117	198.94	368.601	67.2239					0.862324	1.2718	0.0390584	1.55859	0.232562	0.145829	0.685026	0.261507
582	630.74	228.916	292.181	58.5881	239.862	230.143	165.268				0.0553175	0.229441	0.274433	0.160357	0.676928	-0.00263226	0.0477196	0.205938	0.0873382					433.024	250.628	239.227	209.552	339.902	74.6846					0.939335	1.26402	0.0483046	1.69507	0.136596	0.272996	0.726053	0.27604
585	644.545	241.805	294.46	57.5935	229.792	204.681	156.454				0.0784151	0.298663	0.284374	0.140658	0.606526	-0.112974	-0.00816119	0.183929	0.0899599					441.598	250.652	243.669	199.221	369.421	74.8519					0.977733	1.26424	0.0677709	1.5622	0.235306	0.275848	0.730516	0.253565
588	634.432	236.222	289.801	69.6924	225.669	184.717	165.895				0.0614948	0.268681	0.264054	0.380281	0.577701	-0.199493	0.0516894	0.20063	0.0957117					430.496	247.266	246.027	200.128	337.137	68.628					0.928013	1.23365	0.0781029	1.57387	0.127352	0.169761	0.685124	0.264255
591	635.839	233.578	294.215	59.8835	221.972	197.658	160.57				0.0638479	0.254479	0.283305	0.186013	0.551858	-0.143413	0.017936	0.173432	0.0843157					419.616	246.664	233.263	191.683	345.986	75.0192					0.879286	1.22821	0.0221718	1.46524	0.156941	0.278699	0.671758	0.246564
594	651.756	234.279	293.554	56.897	227.996	191.804	165.415				0.0904806	0.258243	0.280424	0.126864	0.593969	-0.168783	0.0486509	0.175693	0.0896005					443.013	246.023	249.213	207.211	379.761	71.6069					0.98407	1.22242	0.0920637	1.66496	0.269882	0.220537	0.742323	0.261948
597	639.3	232.582	283.436	60.3184	249.108	204.253	158.679				0.0696391	0.249131	0.236289	0.194626	0.741571	-0.114831	0.00594547	0.197482	0.1036					424.134	260.211	243.256	189.626	339.076	65.5					0.899519	1.35058	0.0659616	1.43879	0.133836	0.116445	0.667523	0.262402
600	649.04	252.152	294.554	63.0488	220.412	187.429	148.859				0.085936	0.354232	0.284785	0.248702	0.540948	-0.187743	-0.0563053	0.181508	0.0946482					442.465	262.7	245.157	197.227	351.964	77.681					0.981618	1.37308	0.074291	1.53656	0.176931	0.324069	0.744424	0.259921
603	628.647	232.76	313.697	66.5745	236.393	194.393	159.527				0.0518148	0.250086	0.368281	0.31853	0.652674	-0.157562	0.0113233	0.213593	0.101642					431.894	256.063	247.426	200.307	366.537	71.3702					0.934273	1.31312	0.084233	1.57617	0.22566	0.216502	0.724993	0.260299
606	641.142	238.344	290.572	68.084	230.257	194.116	153.554				0.0727209	0.280075	0.267417	0.348426	0.609777	-0.158761	-0.0265419	0.199016	0.0972391					409.799	263.714	250.125	204.834	355.41	71.6389					0.83532	1.38223	0.0960623	1.63439	0.188455	0.221082	0.726257	0.271323
609	637.924	234.126	307.185	59.607	221.011	198.188	168.89				0.0673372	0.25742	0.339877	0.180536	0.545134	-0.141117	0.0706775	0.188552	0.083399					416.712	256.582	243.638	196.716	365.73	76.1161					0.866281	1.3178	0.0676351	1.52998	0.222963	0.297396	0.71701	0.250732
612	642.352	229.936	301.39	76.0799	222.887	204.473	165.166				0.0747449	0.234921	0.3146	0.506788	0.558256	-0.113877	0.0470711	0.231786	0.0935212					415.44	265.485	247.229	206.954	344.381	80.2751					0.860584	1.39823	0.083371	1.66166	0.151573	0.368286	0.753951	0.271519
615	635.466	245.173	282.775	68.4038	232.83	200.622	154.597				0.0632244	0.316754	0.233407	0.35476	0.627768	-0.130567	-0.0199292	0.206488	0.0973138					414.57	267.649	250.674	197.944	330.233	80.3967					0.856689	1.41778	0.0984654	1.54578	0.104263	0.370358	0.732222	0.26295
618	631.742	246.798	294.508	62.771	242.208	200.732	168.633				0.0569933	0.325478	0.284584	0.2432	0.693331	-0.13009	0.069047	0.220363	0.0990186					423.623	267.774	255.961	204.327	342.807	84.3985					0.897232	1.41891	0.121635	1.62786	0.146309	0.438569	0.775085	0.264087
621	651.785	253.75	270.295	64.3238	235.189	207.479	168.466				0.0905291	0.362816	0.178973	0.273954	0.644258	-0.10085	0.067994	0.216811	0.0909903					425.259	266.9	254.258	198.836	352.807	77.9442					0.904561	1.41101	0.114171	1.55725	0.179748	0.328556	0.749216	0.259458
624	658.442	264.428	288.241	67.0854	229.537	202.161	157.225				0.101666	0.420163	0.257248	0.328649	0.604745	-0.123898	-0.00327026	0.226472	0.0955076					420.987	253.319	256.953	205.64	360.847	82.8117					0.885428	1.28833	0.12598	1.64475	0.206635	0.411522	0.760441	0.252143
627	664.469	277.749	280.568	60.9106	240.743	192.131	167.109				0.111751	0.491706	0.223782	0.206355	0.683088	-0.167364	0.0593856	0.229815	0.106387					422.298	253.562	250.447	196.935	343.777	86.2322					0.891299	1.29052	0.0974707	1.5328	0.149554	0.469824	0.738578	0.244196
630	646.198	263.345	290.588	69.4729	234.543	188.86	158.939				0.0811811	0.41435	0.267487	0.375934	0.639746	-0.181539	0.00759628	0.229251	0.105283					409.681	270.338	261.436	189.15	346.332	85.0996					0.834793	1.44207	0.145626	1.43267	0.158099	0.450519	0.743963	0.242024
633	647.237	271.173	271.944	61.1897	231.807	193.214	153.944				0.082919	0.456392	0.186163	0.211882	0.620613	-0.162669	-0.0240708	0.19589	0.102157					432.709	263.763	260.576	201.353	362.014	73.3583					0.937923	1.38267	0.141858	1.58961	0.210537	0.250389	0.752166	0.261469
636	652.331	282.204	282.044	69.4566	261.197	200.283	163.607				0.0914411	0.515633	0.230219	0.375611	0.826089	-0.132037	0.0371872	0.277735	0.122436					416.89	268.989	262.002	200.049	359.158	80.6554					0.867079	1.42988	0.148104	1.57285	0.200985	0.374768	0.765612	0.255347
639	650.014	274.884	287.725	71.4648	233.278	201.205	165.835				0.087566	0.476323	0.254997	0.415384	0.630899	-0.128038	0.0513148	0.255492	0.101447					403.787	256.216	251.254	195.974	367.045	85.8995					0.808397	1.3145	0.101008	1.52043	0.227361	0.464153	0.739309	0.237417
642	642.147	272.711	269.297	74.3252	234.953	184.836	150.446				0.0744022	0.46465	0.174619	0.472035	0.642611	-0.198977	-0.0462489	0.226156	0.116639					406.469	261.324	271.221	194.474	361.811	79.2633					0.820405	1.36064	0.188506	1.50115	0.209859	0.35104	0.738599	0.23857
645	631.982	273.394	269.177	58.8997	230.282	199.551	168.69				0.0573954	0.468321	0.174094	0.166528	0.609955	-0.13521	0.0694115	0.201499	0.0965587					430.639	267.401	263.503	202.852	357.1	83.7623					0.928653	1.41554	0.154685	1.6089	0.194105	0.427725	0.788267	0.256324
648	634.202	294.041	293.201	68.6206	244.726	187.729	160.062				0.0611088	0.579205	0.278882	0.359054	0.710934	-0.18644	0.0147155	0.259637	0.120952					419.81	273.049	258.139	196.182	357.64	79.9177					0.880157	1.46656	0.131176	1.52311	0.195909	0.362194	0.759851	0.256116
651	654.824	285.127	286.914	70.5786	246.437	187.253	171.396				0.0956133	0.531334	0.251459	0.397833	0.722899	-0.188504	0.0865668	0.271029	0.11592					420.264	273.696	260.069	210.709	337.267	83.0027					0.882189	1.4724	0.139635	1.70994	0.127785	0.414778	0.791122	0.278254
654	651.581	281.481	302.476	73.0339	226.635	203.631	166.343				0.0901863	0.511752	0.319338	0.446461	0.584454	-0.117527	0.0545346	0.269886	0.0999802					406.797	268.85	275.347	200.558	363.307	81.8684					0.821874	1.42863	0.206584	1.57939	0.214862	0.395443	0.774464	0.248823
657	654.069	284.254	260.936	74.1789	237.669	190.458	179.591				0.0943502	0.526646	0.138148	0.469138	0.661595	-0.174613	0.138518	0.264826	0.111472					432.083	263.87	271.811	202.465	359.094	79.1764					0.935123	1.38364	0.191089	1.60392	0.200771	0.349558	0.77735	0.253958
660	667.471	285.795	288.47	69.9865	248.652	196.149	168.639				0.116773	0.53492	0.258247	0.386106	0.73838	-0.149952	0.0690876	0.27908	0.113684					420.57	260.124	272.503	203.401	341.649	86.9488					0.88356	1.3498	0.194124	1.61596	0.142438	0.482039	0.777988	0.249848
663	630.703	293.198	292.695	69.4756	219.541	204.747	163.324				0.0552554	0.57468	0.276675	0.375987	0.534863	-0.11269	0.035395	0.248595	0.0998403					415.333	270.328	263.466	190.476	351.329	82.4406					0.860103	1.44198	0.154519	1.44973	0.174808	0.405197	0.747723	0.243918
666	657.781	278.65	275.014	72.2696	230.028	206.753	175.532				0.10056	0.496549	0.199555	0.431323	0.608174	-0.103997	0.112786	0.263564	0.0963233					401.95	255.346	263.923	200.656	332.429	86.4095					0.800166	1.30665	0.156525	1.58065	0.111608	0.472846	0.738074	0.247526
669	648.377	289.894	298.946	67.6626	234.79	200.253	184.182				0.0848269	0.556938	0.303941	0.34008	0.641468	-0.132166	0.167623	0.280387	0.101435					406.75	263.117	259.084	199.161	346.558	82.9406					0.821664	1.37684	0.135321	1.56142	0.158855	0.413719	0.744636	0.25144
672	661.027	288.444	270.841	74.7168	226.272	212.521	176.455				0.105992	0.549145	0.181355	0.479791	0.581916	-0.079001	0.118639	0.276834	0.0973907					419.779	258.396	261.06	193.825	354.354	85.5932					0.880018	1.33419	0.143976	1.4928	0.184923	0.458933	0.74914	0.23673
675	656.681	289.509	258.259	76.5352	238.537	187.375	189.928				0.0987195	0.554866	0.126473	0.515805	0.667666	-0.187975	0.20405	0.282801	0.115737					406.627	274.456	262.565	196.042	357.593	84.6042					0.821116	1.47927	0.150575	1.5213	0.195753	0.442075	0.768349	0.251071
678	669.313	275.442	268.691	70.4946	225.705	200.631	195.847				0.119855	0.479319	0.171975	0.396169	0.577953	-0.130528	0.24157	0.265188	0.0909983					405.175	265.052	254.811	201.328	344.718	86.308					0.814611	1.39432	0.116594	1.58929	0.1527	0.471116	0.756439	0.255554
681	656.216	290.579	264.426	72.1965	223.265	192.842	193.284				0.0979421	0.560617	0.153371	0.429876	0.560898	-0.164281	0.225327	0.26625	0.100988					399.639	271.907	256.333	193.536	345.529	87.1344					0.789817	1.45624	0.123264	1.48908	0.155412	0.485202	0.749837	0.249202
684	662.395	300.431	292.454	72.2615	251.163	208.012	195.214				0.10828	0.613524	0.275624	0.431163	0.75594	-0.0985411	0.237561	0.331936	0.110876					394.171	262.092	259.111	204.387	341.637	95.7514					0.765331	1.36758	0.135436	1.62864	0.142397	0.632079	0.778577	0.252291
687	642.837	297.237	257.729	76.0014	225.832	202.842	204.058				0.0755572	0.596372	0.124161	0.505233	0.578844	-0.120945	0.293623	0.293264	0.105325					414.963	280.825	254.432	190.063	344.856	85.8793					0.858449	1.53681	0.114934	1.44441	0.153164	0.463809	0.761929	0.255187
690	654.345	286.506	267.317	74.6978	224.378	189.08	196.706				0.0948118	0.538738	0.165984	0.479415	0.568676	-0.180584	0.247019	0.273437	0.10354					399.651	276.651	250.459	199.681	353.156	85.5841					0.789873	1.49909	0.0975251	1.56812	0.180917	0.458777	0.765718	0.262358
693	631.327	296.324	271.538	82.3306	249.206	214.518	189.121				0.0562998	0.591467	0.184394	0.630585	0.742254	-0.0703462	0.198936	0.33337	0.119738					397.695	262.772	266.109	199.537	338.819	88.5393					0.781111	1.37372	0.166104	1.56626	0.132975	0.509149	0.754887	0.247373
696	666.097	297.348	264.831	72.5298	226.877	223.929	200.561				0.114474	0.59697	0.15514	0.436477	0.586147	-0.0295631	0.271455	0.304443	0.0917281					401.289	269.142	247.389	195.435	349.384	94.2587					0.797208	1.43126	0.08407	1.5135	0.168303	0.606636	0.76683	0.248326
699	632.793	281.095	269.576	80.7696	225.361	204.039	204.553				0.0587528	0.50968	0.175837	0.599669	0.575548	-0.11576	0.296763	0.30007	0.104218					413.557	276.205	258.356	208.159	339.752	89.2029					0.852149	1.49507	0.132127	1.67715	0.136095	0.52046	0.802174	0.272039
702	635.623	301.012	265.777	72.1396	225.35	197.074	201.816				0.0634863	0.616645	0.159266	0.428749	0.575474	-0.145941	0.279415	0.282442	0.105289					414.577	268.039	260.964	212.033	331.178	82.0146					0.856719	1.42131	0.143559	1.72698	0.107424	0.397935	0.775654	0.277921
705	633.703	283.526	275.329	76.8428	238.921	203.161	217.206				0.0602749	0.522735	0.20093	0.521897	0.670352	-0.119565	0.376979	0.319086	0.107205					397.953	264.09	266.054	205.809	342.221	92.2294					0.782268	1.38563	0.165863	1.64692	0.144353	0.572046	0.782847	0.254477
708	650.24	283.656	254.273	75.103	221.563	196.319	212.013				0.0879438	0.523433	0.109087	0.48744	0.548993	-0.149217	0.344056	0.27882	0.101073					412.602	283.397	258.545	217.16	350.794	90.9762					0.847875	1.56004	0.132958	1.79291	0.173019	0.550686	0.842914	0.286064
711	627.339	285.195	280.384	81.2832	229.843	191.116	208.508				0.0496262	0.531699	0.222976	0.609841	0.606883	-0.171762	0.321837	0.310157	0.112842					393.574	272.867	247.918	201.722	330.744	85.7112					0.762654	1.46491	0.0863885	1.59436	0.105974	0.460944	0.745872	0.268502
714	624.466	288.549	278.177	78.0081	238.858	183.283	209.567				0.0448199	0.549712	0.21335	0.544976	0.669907	-0.20571	0.328551	0.306515	0.11833					401.759	272.846	249.409	225.09	352.601	88.16					0.799312	1.46472	0.0929226	1.8949	0.179059	0.502684	0.822266	0.295048
717	632.54	279.373	260.169	75.0149	240.711	192.28	200.244				0.0583292	0.500429	0.134803	0.485695	0.682866	-0.166719	0.26945	0.280693	0.111599					407.931	279.164	247.607	211.356	329.147	83.0201					0.826956	1.52179	0.0850274	1.71826	0.100632	0.415074	0.777958	0.289279
720	631.856	293.704	269.313	71.3388	233.045	195.25	205.805				0.0571849	0.577396	0.17469	0.412889	0.629266	-0.153847	0.304702	0.28604	0.106615					399.739	265.924	251.448	206.618	340.585	83.5676					0.790267	1.40219	0.10186	1.65733	0.138881	0.424406	0.752489	0.267691
723	634.034	285.686	247.237	74.4268	227.603	195.083	208.034				0.0608282	0.534337	0.0783974	0.474047	0.591223	-0.15457	0.318829	0.27187	0.106657					415.049	286.937	262.267	208.568	316.637	89.4205					0.858833	1.59201	0.149268	1.68241	0.0587993	0.524169	0.810915	0.286216
726	635.792	280.494	245.887	73.9295	216.316	209.009	208.588				0.0637696	0.506452	0.0725112	0.464198	0.512315	-0.0942204	0.322344	0.26391	0.0937332					417.625	264.995	252.348	206.801	335.906	85.479					0.87037	1.3938	0.105801	1.65968	0.123236	0.456986	0.768312	0.267592
729	611.229	294.863	269.783	70.542	228.27	194.137	208.109				0.0226724	0.583621	0.176739	0.397108	0.595883	-0.158671	0.319305	0.276665	0.10651					410.222	271.18	249.668	212.107	319.59	85.0795					0.837213	1.44968	0.0940597	1.72793	0.0686745	0.450177	0.771288	0.284905
732	636.244	284.215	251.976	81.5759	221.42	194.19	199.522				0.0645251	0.526437	0.0990675	0.615638	0.547999	-0.158439	0.264873	0.280014	0.11093					413.105	274.139	252.964	201.438	329.267	85.6655					0.850127	1.4764	0.108503	1.59071	0.101034	0.460165	0.76449	0.268322
735	638.829	276.461	267.484	69.752	217.934	181.732	212.794				0.0688511	0.48479	0.16671	0.381461	0.523626	-0.21243	0.349008	0.251717	0.0988813					411.843	272.298	242.578	203.038	330.819	88.6572					0.844476	1.45977	0.0629884	1.61129	0.106224	0.511158	0.765985	0.270584
738	647.363	271.962	267.46	77.336	230.826	210.19	210.093				0.0831295	0.46063	0.166605	0.531665	0.613755	-0.0890998	0.331883	0.299795	0.0969972					402.097	278.075	259.268	202.339	325.896	85.4671					0.800827	1.51196	0.136125	1.60229	0.0897604	0.456783	0.766292	0.271215
741	617	291.143	255.496	67.4336	246.484	187.482	215.486				0.0323281	0.563644	0.114421	0.335545	0.723225	-0.187511	0.366072	0.278246	0.118994					419.174	277.435	244.744	211.051	314.212	78.6883					0.877306	1.50618	0.0724786	1.71434	0.0506927	0.341239	0.760372	0.296224
744	636.605	283.699	262.251	70.7724	230.815	210.777	215.839				0.0651298	0.523666	0.143885	0.401671	0.613681	-0.0865589	0.36831	0.289969	0.0965703					397.448	275.608	259.372	207.909	338.081	83.6947					0.780005	1.48968	0.13658	1.67393	0.130508	0.426573	0.77288	0.274663
747	653.953	282.022	259.09	74.7642	237.004	206.28	216.331				0.094156	0.514655	0.1301	0.48073	0.656949	-0.106048	0.371429	0.305996	0.103178					403.758	271.045	240.019	213.146	326.395	83.0091					0.808264	1.44846	0.0517769	1.74128	0.0914297	0.414887	0.759349	0.289072
750	652.55	266.478	261.237	74.294	211.541	199.128	210.933				0.0918082	0.431176	0.139462	0.471417	0.478933	-0.137041	0.33721	0.258995	0.0884178					404.463	267.332	250.815	212.306	307.897	87.8327					0.811422	1.41491	0.0990833	1.73049	0.0295753	0.497105	0.763765	0.283594
753	647.95	270.358	263.837	69.8767	238.291	210.128	220.311				0.0841118	0.452015	0.150805	0.383931	0.665945	-0.0893706	0.396666	0.292015	0.0967868					400.808	268.037	246.563	204.082	318.563	79.5484					0.795053	1.42128	0.0804517	1.62471	0.065242	0.355899	0.723773	0.276052
756	636.389	285.929	264.337	72.1518	251.319	210.238	209.422				0.0647681	0.535641	0.152985	0.42899	0.757023	-0.0888935	0.32763	0.311164	0.110099					429.691	279.421	248.722	207.444	322.442	88.8528					0.92441	1.52412	0.0899117	1.66795	0.0782106	0.514492	0.799849	0.282836
759	634.281	284.798	250.578	79.6382	227.285	194.092	223.578				0.0612409	0.529564	0.0929715	0.577261	0.588996	-0.158864	0.417375	0.301221	0.113104					443.417	263.789	229.335	203.259	334.377	82.4726					0.985882	1.38291	0.00495908	1.61413	0.118123	0.405742	0.751957	0.275425
762	641.471	273.077	247.165	76.0366	266.97	184.396	217.427				0.0732713	0.466614	0.078082	0.50593	0.866449	-0.200886	0.378376	0.309691	0.133457					435.241	285.375	248.579	207.711	322.423	85.298					0.949265	1.5779	0.0892872	1.67138	0.0781481	0.453901	0.803315	0.290553
765	631.471	268.874	267.998	72.0813	242.348	196.181	215.184				0.0565399	0.444045	0.168953	0.427594	0.69431	-0.14981	0.364158	0.286541	0.106249					420.299	275.68	243.237	202.942	326.619	88.745					0.882347	1.49033	0.0658766	1.61006	0.0921811	0.512655	0.775574	0.274376
768	634.871	276.717	248.783	71.9417	245.639	193.39	210.933				0.0622288	0.486164	0.0851412	0.424829	0.717317	-0.161908	0.33721	0.278712	0.113249					441.543	288.71	249.483	196.255	319.794	82.7797					0.977488	1.60803	0.0932486	1.52405	0.069358	0.410977	0.780524	0.282315
771	636.782	264.308	240.277	71.4878	253.24	205.482	215.149				0.0654266	0.419519	0.0480397	0.41584	0.770456	-0.109504	0.363935	0.281959	0.113079					436.88	267.497	236.62	199.081	300.092	86.0512					0.956605	1.41641	0.0368827	1.56039	0.00347621	0.466739	0.740084	0.276225
774	625.445	268.65	254.157	75.252	248.609	202.298	214.238				0.0464581	0.442842	0.108579	0.490391	0.738083	-0.123305	0.358163	0.294459	0.11253					424.101	268.779	242.912	202.297	313.534	85.5484					0.899371	1.42799	0.0644511	1.60176	0.0484232	0.458169	0.750028	0.274155
777	627.071	267.35	256.319	72.752	243.098	208.637	238.18				0.0491783	0.435856	0.118013	0.440877	0.69955	-0.0958326	0.509946	0.308227	0.108481					445.574	281.178	249.437	206.607	314.833	80.2495					0.99554	1.53999	0.0930448	1.65718	0.0527689	0.367849	0.784397	0.292348
780	640.598	274.091	260.653	74.7425	244.945	194.649	218.102				0.0718115	0.472062	0.136914	0.4803	0.712463	-0.156453	0.38266	0.299965	0.111919					434.654	271.665	249.123	189.435	322.27	81.2029					0.946634	1.45406	0.0916702	1.43634	0.0776368	0.3841	0.731739	0.259665
783	646.814	259.338	262.41	70.3225	262.448	203.812	217.768				0.0822119	0.392829	0.144577	0.39276	0.834832	-0.11674	0.380544	0.301573	0.114953					426.695	278.698	227.218	210.465	326.349	79.8793					0.91099	1.51759	-0.00431772	1.70681	0.0912785	0.361539	0.76398	0.299067
786	635.834	259.786	238.98	76.7263	249.331	184.824	216.161				0.0638398	0.395235	0.0423816	0.51959	0.74313	-0.199029	0.370355	0.2765	0.122076					441.953	276.5	239.074	207.609	312.949	87.0494					0.979326	1.49773	0.0476359	1.67007	0.046467	0.483753	0.787498	0.289191
789	658.4	243.218	263.797	71.2019	243.512	196.134	200.69				0.101596	0.306253	0.15063	0.410177	0.702444	-0.150017	0.272276	0.256194	0.100672					436.123	276.937	229.067	208.624	309.098	82.2212					0.953216	1.50168	0.00378469	1.68313	0.0335923	0.401457	0.762809	0.298196
792	630.937	254.571	252.544	72.6192	256.465	195.408	212.629				0.0556468	0.367225	0.101546	0.438247	0.793004	-0.153164	0.347965	0.278639	0.116521					430.881	284.62	226.006	208.765	295.897	85.33					0.929738	1.57109	-0.00962964	1.68495	-0.0105514	0.454446	0.770007	0.306651
795	625.952	258.618	248.125	69.6883	252.599	199.815	207.554				0.0473053	0.388964	0.0822685	0.3802	0.765974	-0.134062	0.315791	0.263777	0.111506					421.746	269.453	234.128	204.773	305.686	73.8547					0.888827	1.43408	0.0259596	1.63359	0.0221833	0.25885	0.710582	0.291766
798	632.995	267.829	260.104	70.0583	259.692	211.372	201.735				0.0590903	0.438433	0.134522	0.387528	0.815565	-0.0839795	0.278899	0.290008	0.111829					431.568	271.482	235.002	193.573	318.167	86.3958					0.932815	1.4524	0.0297917	1.48956	0.0639168	0.472613	0.740183	0.267053
801	613.656	266.012	256.823	69.7182	251.202	216.384	219.756				0.0267337	0.42867	0.120211	0.380792	0.756207	-0.0622595	0.393141	0.291928	0.106643					428.273	278.034	227.106	209.009	312.493	81.4424					0.918058	1.51159	-0.00480983	1.68808	0.0449439	0.388182	0.757674	0.299202
804	631.737	244.536	267.269	72.3984	247.367	185.699	204.942				0.0569853	0.313331	0.165773	0.433874	0.7294	-0.195237	0.299234	0.257623	0.110437					449.154	278.413	233.299	199.597	304.034	79.2724					1.01158	1.51501	0.0223278	1.56703	0.0166589	0.351195	0.747299	0.291404
807	609.808	251.461	256.787	78.9499	240.616	205.652	216.546				0.0202948	0.350523	0.120053	0.563629	0.682198	-0.108769	0.372796	0.285818	0.109079					428.656	284.438	230.359	214.546	290.051	76.1161					0.919773	1.56944	0.00944279	1.75929	-0.0300982	0.297396	0.754208	0.320453
810	642.676	239.834	270.606	79.3279	241.539	217.604	224.524				0.0752873	0.288077	0.18033	0.571115	0.688655	-0.0569711	0.423371	0.309981	0.101356					443.354	278.368	249.045	198.418	299.211	78.9525					0.9856	1.5146	0.0913271	1.55186	0.000528904	0.345742	0.748278	0.285311
813	657.336	249.644	257.924	80.8794	252.395	181.554	207.823				0.099815	0.340767	0.125011	0.601843	0.764549	-0.213203	0.317493	0.290896	0.123672					420.76	278.03	230.17	192.268	283.668	88.1965					0.88441	1.51156	0.00861458	1.47277	-0.0514449	0.503306	0.721536	0.280974
816	619.59	259.49	267.207	80.149	267.036	198.241	213.942				0.036662	0.393644	0.165502	0.587378	0.866909	-0.140885	0.356289	0.323643	0.128528					419.761	275.93	233.916	198.73	299.245	82.266					0.879936	1.49259	0.0250332	1.55588	0.0006436	0.402221	0.72605	0.284159
819	623.31	251.373	262.315	73.5718	239.45	214.705	226.883				0.0428851	0.350049	0.144165	0.457114	0.674049	-0.0695336	0.438328	0.291008	0.0991173					413.906	262.413	222.236	207.693	288.195	81.2102					0.853715	1.37048	-0.026153	1.67115	-0.0363061	0.384224	0.702851	0.293565
822	621.474	250.225	255.868	67.3442	244.862	207.881	201.776				0.039814	0.343887	0.116042	0.333774	0.711885	-0.0991084	0.279162	0.246494	0.0992753					440.198	283.171	239.844	208.296	301.716	91.3007					0.971463	1.558	0.0510096	1.67891	0.00890703	0.556217	0.804084	0.295668
825	628.277	241.854	277.851	67.584	237.826	212.964	205.502				0.0511967	0.298926	0.211931	0.338524	0.662694	-0.077079	0.302778	0.255567	0.0887838					412.219	272.108	228.263	210.142	274.995	88.2669					0.84616	1.45806	0.000258015	1.70265	-0.0804445	0.504506	0.738532	0.301627
828	639.353	243.811	271.49	80.9052	243.382	197.801	207.617				0.0697281	0.309435	0.184184	0.602354	0.701539	-0.142794	0.316186	0.291519	0.110734					413.647	277.001	229.829	197.216	292.591	81.9461					0.852553	1.50226	0.00712118	1.53642	-0.0216053	0.396768	0.712252	0.286259
831	628.293	252.517	261.456	69.2425	241.132	190.592	202.974				0.0512237	0.356196	0.140417	0.371371	0.685804	-0.174032	0.286757	0.245391	0.103333					402.223	286.555	234.336	215.467	290.629	83.1645					0.80139	1.58856	0.0268728	1.77114	-0.0281681	0.417535	0.762889	0.315518
834	619.484	259.38	253.219	74.1436	231.469	209.205	205.347				0.036484	0.393054	0.104489	0.468439	0.618253	-0.0933689	0.301796	0.261306	0.0963923					412.821	279.749	233.609	197.858	299.005	80.8565					0.848853	1.52708	0.0236853	1.54467	-0.000159604	0.378196	0.720388	0.286844
837	618.924	255.949	267.673	69.3496	236.875	227.795	209.711				0.0355475	0.374629	0.167534	0.373492	0.656044	-0.0128091	0.329463	0.274843	0.0872199					420.145	273.779	230.382	189.461	285.545	81.9963					0.881656	1.47315	0.00954489	1.43667	-0.0451691	0.397624	0.692246	0.276678
840	625.8	254.871	247.396	77.8482	235.72	214.815	208.896				0.0470517	0.368839	0.0790892	0.541809	0.647969	-0.0690564	0.324298	0.277143	0.101209					408.853	281.8	222.18	198.006	294.746	76.67					0.831082	1.54561	-0.026394	1.54657	-0.0144013	0.306837		0.296732
843	632.931	244.422	255.141	76.9052	245.117	214.146	207.155				0.0589824	0.312718	0.112871	0.523133	0.713666	-0.0719587	0.31326	0.280382	0.103511					416.297	272.302	224.202	198.945	275.354	75.2395					0.864422	1.45981	-0.0175349	1.55865	-0.0792447	0.282454		0.296377
846	602.929	261.519	241.173	66.3577	235.809	221.997	190.927				0.00878529	0.40454	0.0519462	0.314236	0.648592	-0.0379341	0.210379	0.228649	0.0932967					400.763	288.746	223.369	205.525	276.93	76.8044					0.794853	1.60836	-0.0211873	1.64327	-0.0739758	0.309128		0.315974
849	627.973	235.559	268.613	79.8144	246.983	199.074	198.676				0.0506868	0.265119	0.171633	0.580751	0.726713	-0.137273	0.259505	0.273876	0.11221					413.874	281.315	222.53	199.517	292.732	81.0987					0.853572	1.54123	-0.0248634	1.566	-0.0211359	0.382324		0.295861
852	638.885	238.714	246.056	70.1477	245.495	212.747	200.61				0.0689456	0.282062	0.073247	0.389298	0.716308	-0.0780207	0.271769	0.24623	0.0987866					402.294	272.253	227.675	197.493	272.856	83.5082					0.801707	1.45937	-0.00231512	1.53998	-0.0875964	0.423394		0.287628
855	604.348	235.318	265.91	69.8252	240.319	223.089	189.006				0.0111601	0.263823	0.159843	0.382911	0.68012	-0.0332004	0.198207	0.237552	0.0912653					389.085	272.569	229.106	193.034	283.702	79.7815					0.742549	1.46222	0.00395427	1.48263	-0.0513302	0.359872		0.280077
858	612.497	232.308	239.279	65.3279	242.07	223.012	199.615				0.0247936	0.247657	0.0436867	0.293841	0.692366	-0.0335358	0.26546	0.219181	0.0932075					386.458	281.368	231.207	199.959	290.853	80.7898					0.730787	1.5417	0.0131596	1.57169	-0.0274167	0.377059		0.292941
861	643.019	230.649	227.283	73.7927	235.832	203.458	207.641				0.075862	0.238747	-0.00863745	0.461489	0.648756	-0.118275	0.316338	0.230611	0.102176					397.275	277.483	222.792	203.85	285.863	80.8812					0.779232	1.50662	-0.0237162	1.62174	-0.0441051	0.378617		0.299288
864	600.979	244.932	245.004	72.3279	254.212	198.17	196.866				0.00552266	0.315458	0.0686575	0.432478	0.777255	-0.141195	0.248031	0.243744	0.115573					399.19	291.494	227.583	198.207	293.532	80.7962					0.787806	1.63318	-0.00272222	1.54916	-0.0184597	0.377168		0.30062
867	633.057	242.137	255.699	67.3157	245.762	207.551	191.077				0.0591928	0.300448	0.115306	0.33321	0.718178	-0.10054	0.211331	0.233875	0.0982905					414.89	278.011	227.66	185.844	282.719	81.9762					0.858122	1.51138	-0.00238261	1.39016	-0.0546166	0.397281		0.277634
