# Supplementary material for: Hugin-AstA circuitry is a novel central energy sensor that directly regulates sweet sensation in Drosophila and mouse
Source: eLife. 2026 May 5;14:RP108551. doi: 10.7554/eLife.108551 (PMC13143273; doi:10.7554/eLife.108551)
Supplement: Figure 1—figure supplement 8—source data 1. [file elife-108551-fig1-figsupp8-data1.xlsx]

## Sheet: B
	ASTA-GC6m intermediate_0002.oir	ASTA-GC6m intermediate_0003.oir	ASTA-GC6m intermediate_0004.oir	ASTA-GC6m intermediate_0004.oir	ASTA-GC6m intermediate_0006.oir	ASTA-GC6m intermediate_0008.oir						ASTA-GC6m intermediate_0002.oir	ASTA-GC6m intermediate_0003.oir	ASTA-GC6m intermediate_0004.oir	ASTA-GC6m intermediate_0004.oir	ASTA-GC6m intermediate_0006.oir	ASTA-GC6m intermediate_0008.oir						ASTA PLP glucose.oir	ASTA PLP glucose_0001.oir	ASTA PLP glucose_0002.oir	ASTA PLP glucose_0003.oir	ASTA PLP glucose_0004.oir	ASTA PLP glucose_0005.oir	ASTA PLP glucose_0006.oir							ASTA PLP glucose.oir	ASTA PLP glucose_0001.oir	ASTA PLP glucose_0002.oir	ASTA PLP glucose_0003.oir	ASTA PLP glucose_0004.oir	ASTA PLP glucose_0005.oir	ASTA PLP glucose_0006.oir						ASTA DM glucose.oir	ASTA DM glucose_0001.oir
time(sec)	raw data	raw data	raw data	raw data	raw data	raw data						F/F0	F/F0	F/F0	F/F0	F/F0	F/F0	mean	SEM				raw data	raw data	raw data	raw data	raw data	raw data	raw data							F/F0	F/F0	F/F0	F/F0	F/F0	F/F0	F/F0	mean	SEM				raw data	raw data
0	67.1187	71.9869	124.493	211.591	194.071	227.945						0.0459549	-0.0263136	-0.0589219	-0.0206756	-0.104661	-0.00171407	-0.0277218	0.0208561				493.411	328.284	278.266	276.658	262.851	394.46	336.071							0.0382652	0.0854761	0.122044	0.090449	0.0475445	-0.0914481	0.0132904	0.0436601	0.0264136				217.615	227.714
3	61.7968	75.5243	131.946	214.752	220.044	234.361						-0.0369798	0.0215329	-0.00257705	-0.0060467	0.0151648	0.0263848	0.00291316	0.00957355				516.163	318.56	304.98	270.917	231.069	394.528	307.854							0.0861401	0.0533232	0.229763	0.0678212	-0.0791202	-0.0912908	-0.071787	0.0278356	0.0441798				213.694	227.469
6	57.1161	75.2276	127.069	209.075	198.775	231.831						-0.109922	0.0175197	-0.0394469	-0.032322	-0.0829602	0.0153064	-0.0386375	0.0209365				500.312	318.259	291.062	270.729	258.972	407.352	348.685							0.0527867	0.0523279	0.173642	0.067081	0.0320823	-0.0617549	0.0513233	0.0524984	0.0259856				208.095	228.343
9	65.1689	77.4422	126.258	209.843	210.194	225.83						0.0155699	0.0474742	-0.0455782	-0.0287688	-0.0302801	-0.0109763	-0.00875989	0.0141164				501.621	317.986	283.737	281.877	263.386	411.583	355.389							0.0555399	0.0514262	0.144105	0.11102	0.0496763	-0.0520083	0.0715354	0.0616135	0.0231647				211.351	219.969
12	65.2005	71.3946	133.08	212.67	211.719	224.828						0.0160623	-0.034325	0.00599597	-0.015683	-0.0232413	-0.0153646	-0.0110926	0.00765085				498.576	317.591	274.612	276.926	251.209	430.938	370.94							0.0491327	0.0501202	0.107309	0.0915061	0.00114715	-0.00742835	0.118425	0.0586016	0.0188076				206.502	221.85
15	63.0778	72.4394	134.208	215.113	214.671	229.516						-0.0170171	-0.0201931	0.0145229	-0.00437493	-0.00962469	0.00516701	-0.00525333	0.00541955				505.421	299.342	248.694	262.452	244.956	428.383	364.75							0.0635361	-0.0102212	0.00280059	0.0344563	-0.0237738	-0.0133132	0.0997622	0.0218924	0.0173729				204.752	208.187
18	64.9261	70.0793	129.54	222.474	225.69	223.566						0.0117862	-0.0521156	-0.0207648	0.0296955	0.0412092	-0.0208919	-0.0018469	0.0144708				489.411	316.475	248.032	265.86	234.347	449.672	328.407							0.0298482	0.0464301	0.000132037	0.047889	-0.0660524	0.0357199	-0.0098162	0.0120215	0.0154793				208.759	217.805
21	66.3588	69.1558	134.328	216.839	207.55	229.598						0.0341129	-0.0646067	0.01543	0.00361134	-0.0424771	0.00552613	-0.00806725	0.0153114				477.219	298.873	229.892	243.865	246.716	427.043	329.401							0.00419201	-0.0117709	-0.0730117	-0.0388036	-0.0167608	-0.0163996	-0.00682129	-0.022768	0.00971044				194.009	213.039
24	63.2388	77.8237	131.858	214.289	214.184	231.684						-0.0145082	0.0526343	-0.00324453	-0.00818964	-0.0118719	0.0146591	0.0049132	0.0104394				490.307	283.862	246.635	251.53	252.355	446.017	350.622							0.0317321	-0.0614047	-0.00550266	-0.00859396	0.00571432	0.0273014	0.0571624	0.00662984	0.0143257				203.357	212.098
27	69.9195	78.1716	139.318	214.332	217.647	224.093						0.0896016	0.0573399	0.0531464	-0.00799109	0.00410404	-0.0185848	0.0296027	0.0176154				498.037	309.588	254.417	239.244	249.942	427.145	335.226							0.048	0.0236578	0.0258785	-0.0570205	-0.00390383	-0.0161654	0.0107441	0.00445581	0.0129447				197.68	220.676
30	61.2757	76.5905	128.716	225.47	216.262	222.583						-0.0451004	0.0359542	-0.0269967	0.0435621	-0.00228375	-0.0251952	-0.00334329	0.0147492				466.478	288.251	249.131	252.451	257.438	441.955	331.087							-0.0184082	-0.0468934	0.00456149	-0.00496383	0.0259705	0.0179462	-0.00173691	-0.0033606	0.00913365				201.597	204.588
33	69.5185	79.2799	133.874	215.357	231.537	218.025						0.0833525	0.0723307	0.0119943	-0.00324468	0.0681864	-0.0451561	0.0312438	0.0209485				452.97	289.94	250.704	243.829	254.523	448.577	323.397							-0.0468333	-0.0413067	0.0109046	-0.0389467	0.0143545	0.0331978	-0.024924	-0.0133648	0.0121639				190.488	212.972
36	67.9129	78.0382	136.17	213.252	216.214	227.805						0.0583314	0.0555356	0.0293543	-0.0129874	-0.00250705	-0.00232633	0.0209001	0.0127905				467.411	320.301	252.377	268.924	246.764	425.597	317.633							-0.0164455	0.0590808	0.0176514	0.0599638	-0.0165703	-0.0197316	-0.0423022	0.00594949	0.0153327				189.414	218.798
39	65.7124	71.4618	122.499	225.115	211.127	234.555						0.0240396	-0.033416	-0.0739937	0.0419163	-0.0259752	0.0272353	-0.00669896	0.0183247				447.419	300.298	228.531	255.61	253.472	438.432	326.665							-0.0585149	-0.0070598	-0.0785005	0.00748856	0.0101631	0.00983104	-0.0150694	-0.0188088	0.0134897				192.303	215.898
42	69.6412	75.1688	137.657	208.652	223.263	230.767						0.0852647	0.0167244	0.0405904	-0.0342775	0.0300169	0.0106445	0.0248272	0.0160086				459.563	297.497	230.911	239.694	256.421	425.145	308.194							-0.032961	-0.016321	-0.0689065	-0.0552436	0.0219182	-0.0207719	-0.0707606	-0.0347209	0.0125669				181.61	211.831
45	63.7863	66.6194	132.647	215.218	214.396	225.668						-0.0059761	-0.0989138	0.00272052	-0.00388895	-0.0108929	-0.0116858	-0.0214395	0.0156413				453.009	289	218.063	257.953	243.776	453.142	298.774							-0.0467509	-0.0444162	-0.12071	0.0167247	-0.0284749	0.0437123	-0.0991645	-0.0398685	0.0220593				184.748	208.975
48	63.8879	71.9123	129.837	220.014	226.132	236.742						-0.0043928	-0.0273226	-0.0185234	0.0183102	0.0432529	0.0368124	0.00802278	0.0119499				456.394	301.102	227.366	235	263.01	440.932	299.698							-0.0396277	-0.00440103	-0.0831981	-0.0737463	0.0481778	0.0155892	-0.0963788	-0.0333693	0.0207069				196.289	209.874
51	61.2836	70.3256	136.207	215.667	225.607	226.007						-0.0449773	-0.0487841	0.0296347	-0.00180849	0.0408276	-0.0102024	-0.00588501	0.015108				430.946	272.259	209.481	239.13	258.079	460.59	287.118							-0.0931782	-0.0997719	-0.155316	-0.0574698	0.0285242	0.0608678	-0.134309	-0.0643789	0.0307088				189.118	201.751
54	59.223	73.8731	140.572	215.822	220.59	231.803						-0.077089	-0.00080107	0.0626273	-0.00109433	0.0176814	0.0151829	0.00275122	0.0185872				470.219	301.389	220.341	215.428	235.624	469.288	370.694							-0.0105378	-0.00345272	-0.111527	-0.150891	-0.0609651	0.0809024	0.117684	-0.0198268	0.0367388				193.497	207.528
57	57.2322	76.1315	135.466	225.62	235.47	229.519						-0.108113	0.0297458	0.0240302	0.0442578	0.0863316	0.00517883	0.0135719	0.0267608				429.645	279.804	212.754	226.127	253.518	462.49	342.656							-0.0959156	-0.0748226	-0.14212	-0.10872	0.0103484	0.0652441	0.033144	-0.0446916	0.0301967				186.27	204.274
60	55.6464	69.6147	138.657	213.706	229.348	226.983						-0.132826	-0.0583997	0.0481558	-0.0108889	0.0580857	-0.00592584	-0.0169664	0.028967				425.213	282.024	209.655	235.285	242.447	485.15	320.899							-0.105241	-0.0674841	-0.154614	-0.0726229	-0.0337733	0.117436	-0.0324558	-0.0498221	0.0321525				184.4	207.425
63	59.4591	74.5597	135.98	218.344	226.719	232.472						-0.0734097	0.0084858	0.0279135	0.010578	0.0459606	0.0181115	0.00627327	0.0168882				460.406	299.77	205.911	219.683	247.008	480.848	359.981							-0.0311871	-0.0088063	-0.16971	-0.13412	-0.0155971	0.107528	0.0853832	-0.023787	0.0387221				184.628	214.091
66	60.9987	77.6698	142.797	224.523	214.865	238.314						-0.0494171	0.0505527	0.0794476	0.0391768	-0.0087306	0.0436966	0.0257876	0.0190087				436.48	281.248	188.452	206.714	248.459	490.733	351.242							-0.0815319	-0.0700493	-0.240112	-0.185237	-0.00981484	0.130296	0.0590323	-0.0567738	0.0491636				186.746	206.329
69	65.5778	66.6726	127.785	216.97	222.944	246.141						0.021942	-0.0981942	-0.0340291	0.00421905	0.0285448	0.0779737	7.60342e-05	0.0246265				428.065	280.712	200.903	202.924	251.948	470.913	338.472							-0.0992393	-0.0718219	-0.189904	-0.200176	0.0040923	0.0846453	0.0205303	-0.0645533	0.0407004				180.529	207.365
72	52.3997	72.0597	129.983	218.394	224.03	232.154						-0.183421	-0.0253289	-0.017416	0.0108099	0.0335527	0.0167193	-0.027514	0.0324387				422.434	286.506	198.394	213.891	259.123	478.428	368.646							-0.11109	-0.0526616	-0.200021	-0.156947	0.0326845	0.101954	0.111509	-0.0392245	0.0470264				179.831	208.926
75	57.8061	71.7509	130.098	218.466	232.329	226.288						-0.0991695	-0.0295057	-0.0165482	0.011145	0.0718407	-0.00897223	-0.0118683	0.0227301				397.927	303.204	199.415	190.518	243.249	513.352	343.3							-0.162658	0.00254895	-0.195903	-0.249072	-0.0305755	0.182393	0.0350884	-0.0597398	0.0571819				177.672	216.189
78	63.7071	73.3368	133.415	219.453	226.857	231.004						-0.00721032	-0.008055	0.00852456	0.0157109	0.0465977	0.0116833	0.0112085	0.00814541				417.688	280.038	196.805	200.526	247.199	493.633	372.336							-0.121076	-0.0740505	-0.206427	-0.209626	-0.0148351	0.136976	0.122633	-0.0523438	0.0537943				182.287	213.448
81	62.1847	71.7239	133.515	214.702	245.454	232.725						-0.0309349	-0.0298709	0.00927898	-0.00627858	0.132394	0.0192208	0.0156349	0.0247693				393.522	290.669	192.073	184.806	246.087	496.605	354.785							-0.171929	-0.0388966	-0.225509	-0.271587	-0.0192684	0.14382	0.0697158	-0.0733792	0.0585359				186.143	210.942
84	66.3522	72.333	134.728	225.869	242.285	232.333						0.03401	-0.0216323	0.0184522	0.0454103	0.117771	0.0175023	0.0352523	0.0189273				402.37	276.984	192.032	222.552	249.574	496.877	349.461							-0.153309	-0.0841463	-0.225675	-0.122811	-0.00537162	0.144446	0.0536642	-0.0561718	0.0483742				178.556	213.461
87	66.4182	74.6446	138.709	214.109	232.413	227.194						0.0350385	0.00963415	0.0485428	-0.00902183	0.0722282	-0.00500483	0.0252362	0.0131391				377.531	282.906	193.457	178.294	242.381	482.507	342.497							-0.205577	-0.0645664	-0.219931	-0.297253	-0.034036	0.111348	0.0326652	-0.0967644	0.0561122				175.556	211.912
90	65.3602	81.5149	132.569	218.545	229.561	232.855						0.018551	0.102561	0.00213316	0.0115097	0.0590711	0.0197889	0.0356025	0.0155732				383.123	283.357	191.003	227.731	251.413	477.435	355.404							-0.193809	-0.0630735	-0.229823	-0.102399	0.00196055	0.0996666	0.0715836	-0.0594133	0.0476086				179.328	214.396
93	59.0422	76.2584	136.768	218.278	231.47	231.598						-0.0799065	0.0314622	0.0338717	0.0102757	0.0678777	0.0142851	0.0129777	0.0203541				386.908	279.119	179.431	274.854	236.207	508.83	365.376							-0.185844	-0.0770876	-0.276486	0.0833369	-0.0586429	0.171978	0.101648	-0.0344425	0.0615115				186.685	211.808
96	61.0172	69.5196	126.834	224.164	236.872	225.16						-0.0491288	-0.059686	-0.041221	0.0375161	0.0927982	-0.013911	-0.00560542	0.0242894				356.708	270.849	185.771	283.767	245.331	497.115	373.296							-0.249393	-0.104431	-0.250922	0.118468	-0.0222809	0.144995	0.12553	-0.0340048	0.0653348				185.523	214.7
99	65.6623	77.0308	129.682	213.186	217.576	234.007						0.0232588	0.0419096	-0.0196906	-0.0132929	0.00377556	0.0248336	0.0101324	0.00979249				340.643	250.818	182.792	259.141	250.085	525.302	336.582							-0.283199	-0.170665	-0.262932	0.0214064	-0.00333234	0.209917	0.014832	-0.0677104	0.0674577				186.039	212.597
102	57.9908	76.4188	133.948	217.786	207.5	229.118						-0.0962912	0.0336318	0.0125544	0.00799673	-0.0427073	0.00342484	-0.0135651	0.0194561				290.748	271.859	169.925	254.966	239.267	510.702	304.023							-0.388191	-0.101094	-0.314815	0.00495102	-0.046445	0.176289	-0.0833381	-0.10752	0.0722597				177.707	209.127
105	62.0594	74.8479	132.158	216.467	249.276	220.243						-0.0328875	0.012384	-0.000975983	0.0018919	0.150026	-0.0354463	0.0158321	0.027988				253.938	263.835	174.456	260.218	240.275	502.263	267.551							-0.465648	-0.127623	-0.296547	0.0256491	-0.0424286	0.156853	-0.193303	-0.134721	0.0784424				180.039	202.802
108	65.1412	66.5578	136.793	216.922	256.215	246.357						0.0151382	-0.099747	0.0340652	0.00399781	0.182038	0.078924	0.035736	0.0378855				221.981	281.47	167.768	232.153	243.702	508.368	375.312							-0.532894	-0.0693136	-0.323515	-0.0849685	-0.0287734	0.170915	0.131606	-0.105278	0.0939146				175.629	204.626
111	60.0422	70.0681	130.16	226.655	284.44	242.508						-0.0643229	-0.0522671	-0.016081	0.0490445	0.312253	0.0620655	0.0484487	0.0568048				202.83	270.859	170.49	222.523	232.837	506.512	357.935							-0.573193	-0.1044	-0.312538	-0.122923	-0.0720714	0.166638	0.079214	-0.134182	0.0932794				168.021	212.157
114	63.2309	73.9151	130.005	225.795	289.91	231.136						-0.0146313	-0.000232983	-0.0172489	0.0450645	0.337489	0.0122605	0.0604501	0.0561742				198.409	264.047	164.406	222.973	241.698	520.322	315.846							-0.582495	-0.126924	-0.337069	-0.121152	-0.0367595	0.198447	-0.0476881	-0.15052	0.0936198				171.161	206.736
117	58.8311	73.0317	135.241	227.753	296.491	239.379						-0.0831962	-0.0121817	0.0223294	0.054126	0.367851	0.0483616	0.066215	0.0637299				195.267	296.652	170.101	225.996	247.836	546.665	326.223							-0.589107	-0.0191147	-0.314107	-0.109235	-0.0122969	0.259123	-0.0164018	-0.114449	0.101639				171.15	211.424
120	61.9828	74.4076	135.68	228.669	318.182	243.754						-0.0340812	0.00642851	0.0256517	0.0583679	0.467921	0.067522	0.098635	0.0753666				235.308	264.415	171.089	245.513	246.91	494.097	322.354							-0.50485	-0.125706	-0.310121	-0.0323092	-0.0159885	0.138043	-0.0280658	-0.125571	0.0813015				162.911	200.436
123	60.8892	74.25	127.734	232.469	307.587	242.068						-0.0511235	0.00429683	-0.0344161	0.0759534	0.419039	0.0601377	0.0789813	0.0710323				242.602	261.997	165.016	217.711	239.202	522.943	284.476							-0.489503	-0.133702	-0.334609	-0.141891	-0.0467073	0.204485	-0.142274	-0.154886	0.0825048				155.059	194.586
126	57.3879	67.7416	137.116	232.245	320.209	238.163						-0.105687	-0.083735	0.0365001	0.0749185	0.477273	0.0430375	0.0737179	0.0860546				238.404	283.98	163.374	233.987	251.404	513.648	330.601							-0.498337	-0.0610162	-0.34123	-0.077739	0.00192469	0.183076	-0.00320226	-0.113789	0.0869372				146.403	194.926
129	66.9815	70.5289	136.165	227.635	304.362	250.289						0.0438168	-0.0460343	0.0293149	0.0535807	0.404161	0.096142	0.0968301	0.0643174				207.611	261.699	165.535	229.373	243.699	519.662	334.155							-0.563132	-0.134687	-0.33252	-0.0959247	-0.0287837	0.196926	0.00751374	-0.135801	0.0932995				152.109	200.63
132	61.4195	69.806	135.11	223.993	314.819	252.437						-0.0428595	-0.0558122	0.0213414	0.0367242	0.452405	0.105548	0.0862245	0.0770192				184.591	255.229	168.383	254.592	238.893	534.657	339.028							-0.611573	-0.156081	-0.321036	0.00347572	-0.0479379	0.231464	0.0222067	-0.12564	0.103202				142.61	195.678
135	62.496	71.264	141.205	212.105	324.306	257.01						-0.0260837	-0.0360915	0.0674116	-0.0182971	0.496174	0.125577	0.101448	0.0830802				155.041	248.1	147.438	231.042	240.917	517.472	334.901							-0.673753	-0.179652	-0.405489	-0.0893487	-0.0398697	0.191882	0.00976181	-0.169495	0.108674				149.938	192.954
138	54.2005	63.7481	131.088	221.181	320.967	256.641						-0.155358	-0.137751	-0.00906218	0.0237119	0.480769	0.123961	0.0543785	0.0953098				185.043	274.788	138.402	212.299	237.938	501.748	324.104							-0.610621	-0.0914071	-0.441925	-0.163222	-0.0517431	0.155667	-0.0227905	-0.175149	0.0995037				147.172	206.032
141	63.7493	69.584	135.396	196.071	310.889	242.435						-0.00655269	-0.0588149	0.0235033	-0.0925095	0.434273	0.0617445	0.060274	0.0781495				199.497	285.74	150.815	209.51	253.847	551.742	328.124							-0.580206	-0.0551961	-0.391872	-0.174214	0.0116612	0.270815	-0.0106695	-0.132812	0.106203				131.396	204.194
144	62.186	75.8647	138.682	194.454	309.573	250.175						-0.0309146	0.0261371	0.0483433	-0.0999913	0.428201	0.0956445	0.0779033	0.0752915				173.196	288.165	150.042	232.091	254.349	522.508	331.418							-0.63555	-0.0471784	-0.394991	-0.0852133	0.013659	0.203483	-0.000736802	-0.135218	0.107242				132.207	202.446
147	63.6913	71.9356	131.861	177.753	316.469	247.098						-0.00745655	-0.0270075	-0.00322488	-0.177289	0.460015	0.0821675	0.0545341	0.0880812				130.037	277.997	146.787	216.348	258.186	522.28	326.608							-0.726368	-0.0807981	-0.408114	-0.147262	0.0289515	0.202957	-0.0152425	-0.163696	0.117216				131.523	194.069
150	67.3852	78.8881	130.752	158.67	315.235	248.981						0.0501079	0.0670312	-0.0116044	-0.265616	0.454324	0.0904145	0.0641096	0.0944484				171.551	271.882	144.775	217.916	250.964	535.28	321.834							-0.639011	-0.101016	-0.416228	-0.141084	0.000168758	0.2329	-0.0296357	-0.156272	0.108657				130.495	191.071
153	67.5251	63.9011	128.853	165.489	310.409	246.931						0.0522881	-0.135681	-0.0259625	-0.234052	0.432058	0.0814378	0.028348	0.0940005				183.549	257.166	149.957	209.115	247.951	522.072	302.464							-0.613764	-0.149676	-0.395332	-0.175771	-0.0118386	0.202477	-0.0880378	-0.175992	0.0998056				131.877	189.345
156	61.0303	71.4151	125.441	152.311	298.383	246.321						-0.0489247	-0.0340477	-0.0517496	-0.295046	0.376579	0.078765	0.00426258	0.0896641				154.626	265.1	145.197	217.501	253.079	535.558	260.01							-0.674626	-0.123441	-0.414526	-0.142717	0.00859769	0.233541	-0.216041	-0.189888	0.110351				131.834	181.157
159	60.8087	78.4319	128.615	160.804	309.268	244.792						-0.052378	0.0608607	-0.0277571	-0.255736	0.426794	0.0720692	0.0373088	0.0915814				164.478	272.384	143.904	215.284	249.284	533.39	257.806							-0.653895	-0.0993573	-0.419741	-0.151458	-0.00652497	0.228547	-0.222687	-0.189302	0.107746				126.326	189.266
162	59.8206	73.4272	135.769	159.892	307.736	248.832						-0.0677762	-0.00683226	0.0263192	-0.25996	0.41973	0.0897611	0.0335403	0.0913587				144.409	241.776	144.202	219.991	252.705	527.602	306.108							-0.696125	-0.200564	-0.418539	-0.132905	0.00710958	0.215215	-0.0770522	-0.186123	0.112066				120.716	182.623
165	62.4195	70.2817	127.203	157.588	311.39	256.672						-0.0272758	-0.0493779	-0.0384324	-0.270623	0.436586	0.124097	0.0291623	0.0964021				156.789	251.207	141.511	210.373	259.26	528.963	333.385							-0.670076	-0.16938	-0.429391	-0.170813	0.0332305	0.218351	0.00519301	-0.168984	0.113407				137.365	190.221
168	63.9894	73.4795	129.762	172.28	309.291	260.819						-0.00281106	-0.00612486	-0.0190904	-0.202622	0.426899	0.142259	0.0564183	0.0865733				176.624	257.6	150.058	210.686	249.717	542.86	316.865							-0.628337	-0.14824	-0.394924	-0.169578	-0.00479973	0.250359	-0.0446169	-0.162877	0.10696				131.788	182.185
171	69.9578	72.9785	133.39	181.209	316.778	254.727						0.0901984	-0.0129013	0.00833785	-0.161295	0.461441	0.115579	0.0835601	0.0853972				176.585	264.281	134.452	210.873	239.603	527.647	344.415							-0.628419	-0.126151	-0.457852	-0.168843	-0.045106	0.215318	0.0384497	-0.167515	0.109371				138.958	181.678
174	71.8892	80.667	138.875	186.669	311.943	258.372						0.120297	0.0910924	0.0498037	-0.136024	0.439136	0.131543	0.115975	0.0759815				186.426	245.712	142.628	211.106	260.895	550.852	363.862							-0.607711	-0.18755	-0.424885	-0.167924	0.0397493	0.268766	0.0970833	-0.140353	0.115322				129.356	174.815
177	72.5778	74.1278	130.017	200.862	312.802	261.302						0.131028	0.00264397	-0.017162	-0.0703359	0.443099	0.144373	0.105608	0.0758682				216.306	246.995	135.315	229.295	255.474	510.178	370.417							-0.544835	-0.183305	-0.454372	-0.0962314	0.0181441	0.175084	0.116849	-0.138381	0.104284				126.062	177.934
180	70.5633	74.2379	126.668	209.38	301.021	264.718						0.0996344	0.00413317	-0.0424759	-0.0309118	0.38875	0.159333	0.0964104	0.0666952				212.864	248.79	139.066	227.424	229.654	500.613	353.395							-0.55208	-0.177371	-0.43925	-0.103609	-0.0847586	0.153053	0.0655254	-0.162641	0.096321				123.581	171.691
183	67.3865	66.7631	122.566	216.655	291.524	262.988						0.0501282	-0.0969701	-0.0734864	0.00276435	0.344935	0.151757	0.063188	0.0671758				242.899	266.382	140.406	227.12	254.84	517.69	386.388							-0.488877	-0.119202	-0.433847	-0.104803	0.0156158	0.192385	0.165002	-0.110532	0.101345				137.305	164.188
186	64.6794	71.708	131.858	226.301	274.02	257.62						0.00794167	-0.030086	-0.00324453	0.047406	0.264179	0.128246	0.0690738	0.0450322				246.191	280.536	125.788	233.444	232.208	544.99	393.159							-0.481951	-0.0724026	-0.492788	-0.0798781	-0.0745789	0.255265	0.185419	-0.108702	0.1101				132.935	172.359
189	76.8536	66.7603	130.512	239.079	286.231	223.926						0.19766	-0.097008	-0.0134194	0.106548	0.320514	-0.0193144	0.0824967	0.0638437				261.578	275.274	125.89	233.578	225.929	533.587	378.839							-0.449573	-0.0898005	-0.492378	-0.0793523	-0.0996031	0.229	0.142242	-0.119924	0.10245				131.334	174.817
192	63.5792	75.4515	122.733	222.75	286.142	253.456						-0.00920347	0.0205482	-0.0722256	0.0309729	0.320107	0.11001	0.0667015	0.0561423				267.486	257.19	126.41	239.933	254.3	545.083	382.194							-0.43714	-0.149598	-0.490282	-0.0543044	0.0134634	0.25548	0.152356	-0.101432	0.106171				132.294	171.597
195	67.8298	71.3685	121.85	250.166	294.309	253.997						0.0570364	-0.034678	-0.0788974	0.157865	0.357783	0.112383	0.0952486	0.0637198				291.151	252.962	130.424	243.154	234.013	539.163	377.514							-0.387342	-0.163575	-0.474093	-0.0416068	-0.0673858	0.241844	0.138246	-0.107702	0.0981046				133.973	160.733
198	60.8232	70.4851	134.477	182.411	266.353	242.816						-0.052152	-0.0466268	0.0165578	-0.155731	0.22881	0.0634136	0.00904527	0.0533243				260.314	267.011	125.556	257.996	237.287	493.757	360.837							-0.452232	-0.117123	-0.493725	0.016893	-0.0543383	0.13726	0.0879617	-0.125043	0.095414				138.17	161.127
201	61.9987	78.6437	136.413	157.076	307.866	251.757						-0.0338334	0.0637255	0.0311897	-0.272994	0.420328	0.10257	0.0518308	0.0916118				281.981	260.608	122.805	250.707	248.813	471.62	361.249							-0.406638	-0.138294	-0.504819	-0.0118358	-0.00840404	0.086273	0.0892054	-0.127787	0.0900563				139	166.061
204	68.5871	74.945	135.326	164.024	300.12	227.126						0.0688379	0.0136973	0.0229697	-0.240835	0.38459	-0.00529914	0.0406601	0.0819498				255.394	257.494	127.14	236.5	234.014	486.923	382.24							-0.462584	-0.148592	-0.487336	-0.067834	-0.0673807	0.121521	0.152495	-0.137102	0.0962567				138.342	160.905
207	61.5277	70.208	135.212	173.839	306.425	215.008						-0.0411733	-0.0503748	0.0221087	-0.195409	0.413677	-0.0583709	0.0150762	0.0848682				277.032	250.453	133.004	248.395	248.673	469.678	389.164							-0.417053	-0.171873	-0.463692	-0.0209494	-0.00896039	0.0818007	0.173373	-0.118193	0.0923199				138.639	156.113
210	63.0831	71.6138	139.327	156.581	318.155	234.723						-0.0169345	-0.0313601	0.0532137	-0.275285	0.467796	0.0279711	0.037567	0.0984939				271.641	259.908	126.273	238.864	242.749	455.132	384.768							-0.428397	-0.140611	-0.490835	-0.0585163	-0.0325682	0.0482958	0.160119	-0.134645	0.0912565				143.512	163.006
213	59.6979	69.5858	128.113	154.715	297.544	244.419						-0.0696883	-0.0587906	-0.0315534	-0.283919	0.372708	0.070433	-0.000135077	0.088278				275.202	258.791	129.556	245.368	245.674	459.652	364.936							-0.420904	-0.144301	-0.477596	-0.0328811	-0.0209111	0.0587067	0.100322	-0.133938	0.086676				148.989	176.135
216	60.4934	68.5065	132.991	163.819	299.724	247.405						-0.0572915	-0.0733891	0.00532244	-0.241785	0.382762	0.0835124	0.0165219	0.0854401				250.271	248.028	115.166	253.473	230.42	481.707	389.89							-0.473365	-0.17989	-0.53562	-0.000935615	-0.0817051	0.109505	0.175561	-0.140921	0.103946				146.777	167.232
219	65.6741	71.8731	132.084	162.006	314.349	237.317						0.0234427	-0.0278528	-0.00153688	-0.250176	0.450236	0.039332	0.0389075	0.0929324				269.258	234.666	126.511	239.641	236.941	478.353	360.302							-0.433411	-0.224072	-0.489875	-0.0554529	-0.0557181	0.101782	0.0863492	-0.152914	0.0897546				156.301	168.965
222	65.1992	73.7705	124.434	162.116	315.845	232.899						0.0160421	-0.00218883	-0.0593626	-0.249665	0.457136	0.0199802	0.0303237	0.0948638				285.572	246.011	121.152	272.273	246.488	458.658	362.118							-0.399082	-0.18656	-0.511483	0.0731667	-0.0176671	0.0564186	0.0918241	-0.127626	0.0924465				146.935	168.792
225	66.9274	76.4944	121.729	169.326	309.984	232.312						0.0429737	0.0346543	-0.0798121	-0.216294	0.4301	0.0174108	0.0381721	0.0880808				276.877	235.174	121.329	256.452	232.54	450.147	356.404							-0.41738	-0.222393	-0.510768	0.0108073	-0.0732554	0.036814	0.0745987	-0.157368	0.0877766				152.189	166.537
228	66.3615	71.6147	128.796	166.087	328.414	223.524						0.0341549	-0.0313479	-0.0263896	-0.231287	0.515127	-0.0210776	0.0398632	0.102079				320.368	238.361	111.923	262.364	248.796	457.063	350.158							-0.325862	-0.211857	-0.548697	0.0341091	-0.008471	0.0527448	0.0557633	-0.136039	0.0886028				156.46	157.595
231	63.3008	68.4767	126.057	169.115	315	216.314						-0.013542	-0.0737921	-0.0470923	-0.217273	0.453239	-0.0526525	0.0081479	0.0936045				328.645	255.277	115.123	278.14	254.592	497.562	350.241							-0.308446	-0.155921	-0.535792	0.0962899	0.0146271	0.146024	0.0560151	-0.0981718	0.0942395				142.191	157.431
234	64.1636	71.0868	132.771	186.358	312.329	201.345						-9.63849e-05	-0.0384882	0.0036609	-0.137464	0.440917	-0.118209	0.0250534	0.0866038				321.411	235.116	117.085	270.241	263.599	468.542	309.92							-0.323667	-0.222585	-0.527883	0.0651559	0.050526	0.0791828	-0.0655574	-0.134975	0.0876685				139.608	153.145
237	56.2546	72.5075	138.386	185.967	334.211	184.595						-0.123348	-0.019272	0.0461012	-0.139276	0.541868	-0.191563	0.019085	0.110339				315.392	224.767	111.929	262.232	235.351	473.023	300.921							-0.336332	-0.256805	-0.54867	0.0335884	-0.0620515	0.0895052	-0.0926913	-0.167637	0.0852132				131.374	146.961
240	58.8984	68.0308	124.335	181.088	308.557	175.013						-0.0821475	-0.0798233	-0.0601163	-0.161858	0.423515	-0.23353	-0.0323268	0.0949672				340.802	239.547	115.618	281.926	231.235	484.917	298.192							-0.282864	-0.207933	-0.533796	0.111214	-0.0784562	0.116899	-0.10092	-0.139408	0.0865363				148.129	151.59
243	61.6583	69.695	131.65	201.141	339.201	156.77						-0.0391381	-0.0573136	-0.00481234	-0.0690436	0.564889	-0.313424	0.0135263	0.119142				325.073	239.067	119.599	267.977	242.855	472.975	339.959							-0.315962	-0.209519	-0.517743	0.0562316	-0.0321461	0.0893939	0.0250125	-0.129248	0.0855885				147.737	153.834
246	63.9327	74.2901	132.891	185.974	315.224	148.355						-0.00369465	0.00483922	0.00456802	-0.139243	0.454271	-0.350279	-0.00492308	0.107759				339.963	232.356	107.929	277.13	254.319	456.99	339.454							-0.28463	-0.231711	-0.564803	0.0923074	0.0135407	0.052576	0.0234908	-0.128461	0.0913145				146.675	148.149
249	63.6029	69.695	135.076	159.093	318.778	141.91						-0.00883414	-0.0573136	0.0210813	-0.263656	0.470668	-0.378505	-0.0360932	0.119764				340.417	225.071	112.591	270.65	238.479	486.407	355.684							-0.283675	-0.2558	-0.546002	0.0667696	-0.0495859	0.120331	0.0724269	-0.125077	0.0927306				144.588	138.055
252	67.7309	73.1045	129.539	167.353	334.829	136.172						0.0554952	-0.0111971	-0.0207716	-0.225426	0.54472	-0.403634	-0.0101355	0.130828				314.372	244.491	120.042	248.983	246.362	458.545	350.582							-0.33848	-0.191587	-0.515959	-0.0186314	-0.0181716	0.0561576	0.0570436	-0.138518	0.0831324				133.483	142.053
255	70.2084	69.3563	126.205	166.091	326.464	121.55						0.0941037	-0.0618948	-0.0459781	-0.231269	0.50613	-0.467672	-0.0344301	0.133674				315.422	258.726	114.669	257.503	242.271	445.378	352.029							-0.336269	-0.144519	-0.537623	0.0149479	-0.0344736	0.025831	0.0614073	-0.135814	0.0844778				147.49	142.459
258	66.9578	68.7118	122.964	172.973	320.909	105.644						0.0434475	-0.0706122	-0.0704778	-0.199415	0.480499	-0.537332	-0.0589818	0.135442				337.159	250.622	117.378	268.14	240.53	464.413	351.011							-0.29053	-0.171313	-0.526701	0.0568748	-0.0414144	0.0696739	0.0583358	-0.120725	0.0848467				142.55	147.524
261	64.1319	66.4226	124.977	160.36	325.565	73.4449						-0.000590387	-0.101576	-0.0552587	-0.257795	0.501983	-0.678348	-0.0985973	0.15638				324.987	245.376	121.027	263.11	248.894	443.81	362.777							-0.316143	-0.188659	-0.511986	0.0370499	-0.00807964	0.0222188	0.0938125	-0.124541	0.0844912				150.576	143.773
264	64.2296	66.0737	124.158	174.219	310.652	65.2708						0.000932137	-0.106295	-0.0614505	-0.193649	0.433182	-0.714146	-0.106904	0.150738				324.826	217.701	109.621	253.377	246.576	443.007	336.742							-0.316481	-0.280169	-0.55798	-0.00131361	-0.0173172	0.0203686	0.015315	-0.162511	0.0853674				147.209	139.584
267	64.0739	70.278	121.987	177.828	311.174	220.029						-0.00149424	-0.049428	-0.0778633	-0.176943	0.435587	-0.0363822	0.0155794	0.0874492				303.888	238.768	109.966	268.118	252.773	433.8	329.227							-0.360541	-0.210509	-0.556589	0.0567881	0.00737739	-0.000837058	-0.00734442	-0.153094	0.087745				139.367	135.597
270	67.9116	68.8685	135.519	174.185	334.362	233.625						0.0583112	-0.0684927	0.0244309	-0.193807	0.542564	0.023162	0.0643614	0.102682				308.961	240.425	112.581	260.478	241.273	423.225	334.868							-0.349866	-0.205031	-0.546045	0.0266754	-0.0384537	-0.0251942	0.00966322	-0.161179	0.0821841				143.338	141.53
273	58.2797	75.2528	128.372	181.345	328.201	235.72						-0.0917891	0.0178606	-0.0295986	-0.160668	0.514141	0.0323361	0.047047	0.0979015				312.609	235.976	98.5681	266.03	259.226	429.56	345.24							-0.342189	-0.219739	-0.602547	0.0485579	0.0330966	-0.010603	0.0409356	-0.150355	0.094546				147.486	144.782
276	65.6794	76.6716	133.38	192.322	318.469	269.593						0.0235253	0.0370511	0.00826452	-0.109859	0.469242	0.180683	0.101484	0.0826849				321.617	222.733	98.9491	275.78	247.669	436.265	358.445							-0.323235	-0.263528	-0.60101	0.0869875	-0.0129608	0.00484053	0.0807499	-0.146879	0.0973952				145.185	141.468
279	64.2625	71.1101	128.448	198.97	316.668	265.103						0.00144484	-0.0381731	-0.029018	-0.0790918	0.460935	0.161022	0.0795199	0.0834677				318.772	234.172	106.862	271.82	248.301	426.408	377.511							-0.329221	-0.225705	-0.569103	0.0713796	-0.0104433	-0.0178622	0.138236	-0.134674	0.0952291				151.427	143.612
282	65.8865	72.2752	126.924	211.112	324.197	272.454						0.0267527	-0.0224141	-0.0405407	-0.0228922	0.495668	0.193215	0.104965	0.085693				318.185	230.415	115.188	263.282	240.344	447.223	373.122							-0.330456	-0.238127	-0.535531	0.037729	-0.0421556	0.0300806	0.125004	-0.136208	0.0903119				156.648	137.509
285	69.3931	76.8358	125.653	223.827	318.064	272.297						0.0813984	0.0392721	-0.0501486	0.0359549	0.467376	0.192527	0.12773	0.075187				309.007	232.434	106.287	263.141	248.565	434.473	372.707							-0.349768	-0.231452	-0.571424	0.0371724	-0.0093928	0.00071374	0.123752	-0.142914	0.0946481				152.113	136.475
288	63.3852	72.0588	121.891	246.453	316.224	260.943						-0.0122267	-0.0253411	-0.0785845	0.140681	0.458884	0.142801	0.104369	0.0800766				308.821	235.119	93.7307	260.029	236.34	432.495	371.744							-0.350161	-0.222574	-0.622052	0.0249037	-0.0581124	-0.00384284	0.12085	-0.158713	0.0977594				156.086	135.415
291	61.2982	70.9608	126.874	260.204	319.538	278.327						-0.0447498	-0.0401925	-0.0409209	0.204322	0.474178	0.218933	0.128595	0.0857508				309.925	233.158	96.5279	272.067	242.4	473.8	381.075							-0.347837	-0.229058	-0.610773	0.0723551	-0.0339587	0.0912941	0.148982	-0.129856	0.105264				157.814	137.582
294	62.3483	68.5112	128.291	254.446	278.772	271.85						-0.0283854	-0.0733255	-0.0302056	0.177671	0.286104	0.190569	0.0870712	0.0609221				304.09	226.129	104.325	250.617	243.981	445.812	342.492							-0.360116	-0.252302	-0.579333	-0.0121933	-0.0276615	0.0268293	0.032651	-0.167447	0.0893626				148.57	144.53
297	65.6517	67.3451	121.992	246.447	286.222	243.839						0.0230937	-0.089098	-0.0778232	0.140651	0.320474	0.0678929	0.0641985	0.0624221				310.613	248.665	104.975	264.242	251.081	472.685	350.127							-0.346389	-0.177786	-0.576711	0.041512	0.000637431	0.088726	0.0556708	-0.13062	0.0947997				158.691	145.318
300	59.2045	69.417	134.055	240.661	302.979	249.2						-0.0773773	-0.0610738	0.0133618	0.113871	0.397779	0.0913741	0.0796559	0.0710328				316.245	259.564	93.8727	250.045	242.123	465.273	334.857							-0.334539	-0.141746	-0.62148	-0.0144451	-0.0350658	0.0716548	0.00963095	-0.152284	0.0929128				151.562	145.088
303	61.3496	78.0597	113.97	243.206	286.652	263.891						-0.0439488	0.0558264	-0.138465	0.12565	0.322459	0.155713	0.0795391	0.0658979				326.598	240.039	104.965	248.499	242.733	457.3	357.168							-0.312753	-0.206306	-0.576754	-0.0205411	-0.0326351	0.05329	0.0769014	-0.145543	0.0893074				166.148	139.374
306	60.0422	65.5271	124.411	250.29	280.63	269.497						-0.0643229	-0.113688	-0.0595357	0.15844	0.294673	0.180262	0.0659713	0.0680498				361.062	251.476	93.4655	280.824	236.156	437.547	379.266							-0.240232	-0.168488	-0.623122	0.106868	-0.0588437	0.00779264	0.14353	-0.118928	0.098913				171.132	144.091
309	57.5092	70.5933	122.969	251.126	280.507	242.409						-0.103796	-0.0451633	-0.0704378	0.162306	0.294108	0.0616328	0.0497748	0.0631271				415.056	246.643	107.975	243.29	244.567	470.677	352.36							-0.126614	-0.184472	-0.564614	-0.0410704	-0.0253237	0.0841003	0.0624035	-0.113656	0.0833412				179.386	146.923
312	60.3483	71.3097	120.147	250.137	297.363	256.948						-0.0595527	-0.0354733	-0.0917747	0.157729	0.371873	0.125303	0.0780174	0.072013				469.903	244.524	100.235	267.171	240.951	462.472	347.322							-0.0112025	-0.191479	-0.595826	0.0530559	-0.0397358	0.0652019	0.0472152	-0.09611	0.0897102				192.943	148.886
315	57.0211	71.2015	131.628	236.056	273.376	245.524						-0.111403	-0.0369368	-0.0049794	0.0925559	0.261209	0.0752715	0.045953	0.0527865				466.576	233.197	93.9696	256.869	232.191	496.247	369.418							-0.0182036	-0.228928	-0.621089	0.0124513	-0.0746459	0.142995	0.113836	-0.0962264	0.0991401				218.589	147.635
318	66.0343	72.0541	127.501	233.032	278.376	251.62						0.029056	-0.0254047	-0.0361774	0.0785601	0.284277	0.101969	0.0720467	0.0479711				501.157	211.002	98.9056	246.411	250.486	497.988	389.293							0.0545644	-0.302319	-0.601186	-0.0287713	-0.00173622	0.147007	0.173761	-0.0798115	0.10509				229.251	144.017
321	57.6544	71.8675	118.835	237.606	276.036	238.994						-0.101534	-0.0279286	-0.101689	0.0997322	0.273479	0.0466755	0.0314559	0.0584262				481.187	258.422	100.598	258.767	228.854	485.202	383.656							0.0125421	-0.145524	-0.594363	0.0199307	-0.0879457	0.117555	0.156766	-0.0744341	0.095412				239.08	159.529
324	57.0198	64.3965	116.469	234.32	283.416	238.61						-0.111423	-0.12898	-0.119576	0.0845215	0.307528	0.0449947	0.0128441	0.0697858				499.349	242.602	88.9885	258.438	242.594	471.033	383.402							0.050761	-0.197832	-0.641174	0.018634	-0.0331863	0.0849217	0.156001	-0.080268	0.102436				241.893	157.461
327	58.6253	68.2938	122.757	230.451	278.192	237.889						-0.0864034	-0.076266	-0.0720388	0.0666156	0.283429	0.0418366	0.0261954	0.0579868				484.572	240.025	101.795	257.047	230.435	490.188	384.031							0.0196653	-0.206353	-0.589536	0.0131505	-0.0816433	0.129041	0.157895	-0.0796829	0.0969163				224.937	159.969
330	61.0264	72.3228	130.101	228.422	270.999	249.615						-0.0489854	-0.0217702	-0.0165217	0.0572261	0.250241	0.0931898	0.0522299	0.0452248				499.49	243.588	106.417	250.7	231.474	471.993	373.822							0.051056	-0.194572	-0.570898	-0.0118666	-0.0775034	0.0871328	0.127114	-0.0842196	0.0908474				230.423	157.064
333	63.3905	69.6017	120.412	233.944	258.004	227.315						-0.0121441	-0.0585755	-0.0897662	0.0827798	0.190292	-0.00447491	0.0180185	0.0419413				476.37	244.418	107.612	261.953	240.656	438.632	347.324							0.00240634	-0.191826	-0.566077	0.0324907	-0.0409098	0.0102917	0.0472212	-0.100915	0.0832416				229.752	154.738
336	56.0528	68.6521	118.959	227.702	254.11	225.238						-0.126492	-0.0714197	-0.100755	0.0538941	0.172325	-0.0135694	-0.0143363	0.0457544				478.45	226.024	93.9105	269.421	225.021	474.638	320.28							0.00678404	-0.252649	-0.621327	0.0619243	-0.103223	0.093225	-0.0343215	-0.12137	0.0940073				215.699	155.9
339	62.5858	73.6866	126.789	174.516	264.02	236.033						-0.0246843	-0.00332365	-0.0415612	-0.192276	0.218045	0.0337074	-0.00168209	0.0541542				466.172	254.085	97.6765	251.749	233.431	473.022	269.365							-0.0190531	-0.159865	-0.606142	-0.00773116	-0.0697029	0.0895015	-0.187835	-0.137261	0.0858646				221.662	163.261
342	68.1042	67.125	117.804	160.503	254.065	222.617						0.0613126	-0.0920751	-0.109482	-0.257132	0.172121	-0.0250481	-0.0417172	0.0605946				483.372	248.061	92.4984	248.412	242.044	510.262	280.491							0.0171399	-0.179781	-0.627021	-0.0208832	-0.0353798	0.175276	-0.154288	-0.117848	0.0957138				225.979	160.314
345	58.4327	68.8265	124.551	111.418	261.362	216.687						-0.0894048	-0.0690608	-0.0584812	-0.484316	0.205782	-0.051019	-0.0910834	0.0905386				464.092	253.014	87.7759	258.529	254.88	473.217	285.454							-0.0234308	-0.163404	-0.646064	0.0189915	0.0157756	0.0899506	-0.139325	-0.121072	0.0938782				210.073	169.556
348	70.467	73.7276	117.819	101.461	270.909	210.755						0.0981336	-0.00276909	-0.109368	-0.530398	0.249827	-0.0769956	-0.0619284	0.107742				481.639	239.359	97.4672	268.631	231.801	488.392	277.268							0.0134941	-0.208555	-0.606986	0.0588097	-0.076201	0.124903	-0.164005	-0.122649	0.0923985				221.313	167.592
351	64.2322	73.236	117.066	155.586	269.473	199.509						0.000972654	-0.00941841	-0.11506	-0.279887	0.243202	-0.126251	-0.0477402	0.0714322				483.841	244.229	96.7668	252.708	235.372	502.837	284.335							0.0181273	-0.192453	-0.60981	-0.00394811	-0.061969	0.158174	-0.142698	-0.119225	0.0924495				218.004	173.665
354	64.1425	72.6838	122.33	164.176	260.329	196.501						-0.0004252	-0.0168874	-0.0752682	-0.240132	0.201018	-0.139421	-0.0451861	0.060885				497.716	249.807	93.1478	264.858	227.426	485.862	280.947							0.0473234	-0.174008	-0.624403	0.0439372	-0.0936351	0.119076	-0.152915	-0.119232	0.094004				227.283	176.276
357	64.3417	74.6138	121.544	172.518	260.077	203.573						0.00267906	0.00921755	-0.0812128	-0.201521	0.199854	-0.108453	-0.029906	0.0558677				486.049	235.889	92.6223	247.846	246.987	483.565	264.355							0.0227724	-0.22003	-0.626522	-0.0231141	-0.0156796	0.113786	-0.20294	-0.135961	0.0934747				209.856	177.458
360	65.2942	73.9571	123.616	174.439	275.897	199.072						0.0175225	0.000335104	-0.0655469	-0.192629	0.272841	-0.128164	-0.0159401	0.0660942				480.269	258.423	91.8259	237.372	251.203	452.83	257.603							0.0106111	-0.145519	-0.629733	-0.0643978	0.00112125	0.0429944	-0.223299	-0.144032	0.0884382				219.024	179.568
363	54.81	79.43	112.546	194.165	259.366	190.41						-0.14586	0.0743609	-0.149227	-0.101332	0.196575	-0.166099	-0.0485969	0.0609376				496.669	240.986	89.5805	235.548	245.721	454.005	238.38							0.0451209	-0.203176	-0.638787	-0.0715867	-0.0207258	0.0457007	-0.281259	-0.160673	0.0922475				210.311	196.76
366	64.1504	77.9674	110.317	210.932	266.476	187.913						-0.000302089	0.054578	-0.16608	-0.0237243	0.229375	-0.177033	-0.0138643	0.0616237				488.337	252.484	92.3005	252.605	237.983	488.01	235.979							0.0275867	-0.165156	-0.627819	-0.00435645	-0.051563	0.124024	-0.288496	-0.140826	0.0957006				218.825	206.066
369	65.6491	74.0653	124.842	212.855	264.952	190.936						0.0230531	0.0017986	-0.0562799	-0.0148249	0.222343	-0.163794	0.00204938	0.0516919				498.456	252.81	94.4466	242.619	246.557	486.998	235.029							0.048881	-0.164078	-0.619166	-0.0437151	-0.0173941	0.121694	-0.291361	-0.137877	0.0953091				215.194	219.836
372	65.3773	71.8918	119.567	226.492	255.654	181.061						0.0188175	-0.0275999	-0.0961515	0.04829	0.179448	-0.207041	-0.0140395	0.0537209				493.387	269.114	81.4828	246.36	227.694	467.438	217.645							0.0382141	-0.110168	-0.671439	-0.0289704	-0.0925694	0.0766414	-0.343777	-0.161724	0.0993802				207.315	247.189
375	60.2916	70.07	122.29	224.709	261.43	172.993						-0.0604363	-0.0522414	-0.0755683	0.0400381	0.206097	-0.242375	-0.0307476	0.0603447				477.884	319.751	88.6954	240.542	219.45	467.173	209.276							0.00559219	0.0572619	-0.642356	-0.0519044	-0.125425	0.076031	-0.369009	-0.149973	0.0998645				206.027	269.091
378	64.5831	77.944	120.096	225.993	282.312	177.958						0.00644096	0.0542614	-0.0921549	0.0459809	0.302435	-0.220633	0.016055	0.0712254				471.185	336.346	96.344	236.307	252.349	484.958	200.858							-0.00850425	0.112136	-0.611515	-0.0685947	0.00568841	0.116995	-0.39439	-0.121169	0.104402				208.31	298.312
381	66.9103	81.5979	116.515	218.173	259.617	184.109						0.0427072	0.103684	-0.119223	0.00978607	0.197731	-0.193691	0.00683226	0.0586567				478.492	355.825	87.5755	249.519	232.592	472.517	183.484							0.00687052	0.17654	-0.646872	-0.016518	-0.0730498	0.0883383	-0.446776	-0.130209	0.113808				203.175	306.345
384	61.847	72.584	118.526	209.852	276.038	182.562						-0.0361975	-0.0182373	-0.104025	-0.0287248	0.273492	-0.200467	-0.0190264	0.0648336				495.873	380.688	91.9565	237.372	249.975	466.02	182.752							0.0434453	0.258752	-0.629207	-0.0643978	-0.00377032	0.0733746	-0.448982	-0.110112	0.118623				205.201	336.649
387	59.4142	70.1073	122.54	193.243	266.293	184.763						-0.0741094	-0.0517368	-0.07368	-0.105596	0.228534	-0.190828	-0.0445693	0.0581586				476.462	384.365	89.9622	234.424	246.249	485.78	161.491							0.00259909	0.270911	-0.637248	-0.0760181	-0.0186196	0.118887	-0.513086	-0.121796	0.125277				208.378	323.874
390	64.8865	78.0924	116.91	197.38	261.275	180.144						0.011169	0.0562687	-0.11624	-0.0864486	0.205381	-0.211056	-0.0234878	0.0599144				457.781	368.969	89.2299	241.846	237.3	477.298	159.426							-0.0367093	0.220002	-0.640201	-0.0467631	-0.0542869	0.0993517	-0.519313	-0.139703	0.120285				189.189	329.834
393	56.3588	75.7481	111.202	193.472	268.852	179.675						-0.121724	0.02456	-0.159388	-0.104539	0.240337	-0.213111	-0.0556441	0.0674174				466.501	349.498	89.3259	224.582	245.849	475.985	159.089							-0.018361	0.155623	-0.639814	-0.11481	-0.0202161	0.0963268	-0.52033	-0.151654	0.116142				203.426	327.865
396	60.4129	77.3088	120.285	196.718	283.749	173.573						-0.058546	0.0456698	-0.090727	-0.0895122	0.309066	-0.239835	-0.0206474	0.0757719				460.692	345.956	88.2488	236.342	234.291	489.7	149.376							-0.0305853	0.14391	-0.644157	-0.0684568	-0.0662787	0.127916	-0.549616	-0.155324	0.119046				204.016	336.01
399	68.6227	75.6269	119.478	192.858	278.178	178.722						0.0693927	0.0229206	-0.0968251	-0.107381	0.283363	-0.217284	-0.00763572	0.0715085				464.307	344.539	84.8473	235.99	233.82	536.013	167.469							-0.0229786	0.139225	-0.657873	-0.0698457	-0.068153	0.234589	-0.495064	-0.1343	0.123066				192.666	326.683
402	62.4024	84.0373	122.121	189.461	272.523	178.025						-0.0275423	0.136679	-0.0768496	-0.123104	0.257273	-0.220336	-0.00898015	0.0718224				464.101	334.359	83.0427	228.014	220.97	531.695	166.837							-0.0234112	0.105564	-0.665149	-0.10128	-0.119365	0.224643	-0.496968	-0.15371	0.120582				185.314	330.648
405	57.2111	82.2668	117.035	191.502	290.893	179.059						-0.108442	0.112731	-0.115293	-0.113656	0.342024	-0.21581	-0.0164076	0.0841857				440.047	340.382	87.4819	213.544	242.888	515.577	159.441							-0.0740275	0.125481	-0.647249	-0.158315	-0.0320174	0.187518	-0.519269	-0.159697	0.118776				182.381	327.607
408	64.0937	72.8517	108.202	189.269	282.801	181.943						-0.00118568	-0.0146164	-0.182066	-0.123991	0.304689	-0.20318	-0.0367251	0.0763243				454.293	315.069	80.2857	217.566	243.792	525.745	165.164							-0.0440486	0.0417814	-0.676266	-0.142462	-0.0284131	0.210938	-0.502014	-0.162926	0.118806				184.619	326.963
411	58.9208	82.1604	116.097	183.527	287.655	187.455						-0.0817984	0.111292	-0.122385	-0.150568	0.327086	-0.17904	-0.0159024	0.0804672				454.684	317.11	86.5837	213.158	239.824	546.575	164.741							-0.0432266	0.0485291	-0.650871	-0.159837	-0.0442256	0.258915	-0.503288	-0.156286	0.119992				183.396	325.528
414	60.4208	76.0457	122.004	191.912	293.638	186.275						-0.0584229	0.0285853	-0.0777302	-0.111759	0.354688	-0.184208	-0.00814128	0.0779104				443.736	307.418	81.7586	221.042	233.195	530.555	171.111							-0.0662632	0.0164849	-0.670327	-0.128764	-0.070645	0.222017	-0.484082	-0.168797	0.115444				186.29	323.833
417	65.3905	69.6129	119.792	190.751	303.18	183.598						0.0190232	-0.058424	-0.0944567	-0.117132	0.398706	-0.195931	-0.0080357	0.0862912				441.793	314.743	79.4056	228.053	267.392	531.595	183.601							-0.0703539	0.0407035	-0.679815	-0.101127	0.0656382	0.224412	-0.446423	-0.138138	0.11946				186.762	324.751
420	59.3061	70.9151	114.347	197.949	295.538	198.112						-0.075794	-0.0408106	-0.135616	-0.083816	0.363455	-0.132367	-0.0174914	0.0775911				442.678	307.657	84.6732	217.292	225.092	550.81	170.022							-0.0684895	0.0172725	-0.658575	-0.143544	-0.10294	0.26867	-0.487365	-0.167853	0.117757				182.632	322.978
423	55.033	67.8769	106.389	186.594	312.171	200.847						-0.142385	-0.081905	-0.19577	-0.13637	0.440188	-0.120388	-0.0394384	0.0970963				435.32	317.32	80.3079	206.381	252.105	558.383	185.756							-0.0839746	0.0492238	-0.676177	-0.186549	0.0047152	0.286113	-0.439924	-0.14951	0.121541				178.504	321.261
426	63.8826	71.1567	118.375	187.158	291.731	194.938						-0.00447539	-0.0375428	-0.105165	-0.13376	0.345888	-0.14627	-0.0135543	0.0753463				448.316	313.806	78.1888	212.231	239.195	548.667	175.674							-0.056627	0.037604	-0.684722	-0.163492	-0.0467332	0.263733	-0.470325	-0.16008	0.120886				184.641	329.202
429	60.8074	74.5793	111.667	189.792	294.983	195.865						-0.0523983	0.00875091	-0.155872	-0.121568	0.360891	-0.142209	-0.0170674	0.079711				436.94	314.02	76.0936	202.398	258.191	546.953	175.537							-0.0805644	0.0383142	-0.69317	-0.202248	0.0289722	0.259787	-0.470735	-0.159949	0.12346				191.359	328.154
432	61.9551	72.2341	105.853	198.016	311.286	199.847						-0.0345129	-0.02297	-0.199827	-0.0835068	0.436106	-0.124767	-0.00491288	0.0920568				425.408	309.32	83.8892	197.703	258.817	543.733	181.127							-0.104832	0.0227716	-0.661736	-0.220751	0.0314642	0.25237	-0.453883	-0.162085	0.118012				177.041	330.26
435	63.3588	75.3284	104.659	173.762	314.659	209.391						-0.0126381	0.0188831	-0.208847	-0.195763	0.451669	-0.0829732	-0.00494493	0.09886				415.247	302.384	76.2053	209.218	248.256	525.005	182.395							-0.126213	-0.000161738	-0.69272	-0.175368	-0.0106235	0.209234	-0.450058	-0.177987	0.114563				173.617	326.409
438	63.9485	76.9534	111.208	176.562	322.436	212.483						-0.00344843	0.0408627	-0.159341	-0.182805	0.487545	-0.0694287	0.0188973	0.100144				423.019	314.379	77.7783	188.588	251.752	520.568	187.61							-0.109859	0.0395009	-0.686377	-0.256679	0.00330958	0.199015	-0.434335	-0.177918	0.115192				178.685	333.132
441	62.6821	73.5121	109.776	172.874	321.01	217.896						-0.0231836	-0.00568391	-0.17017	-0.199872	0.480966	-0.0457242	0.00605547	0.100445				410.979	303.603	74.2521	206.509	245.331	505.433	180.349							-0.135193	0.00387056	-0.700595	-0.186043	-0.0222809	0.164155	-0.456228	-0.190331	0.111883				179.331	321.654
444	66.8562	75.5728	113.463	182.611	321.177	220.743						0.0418642	0.0221889	-0.142301	-0.154807	0.481735	-0.0332535	0.0359045	0.0952014				430.682	285.872	77.0911	201.828	255.24	492.322	181.316							-0.0937327	-0.0547606	-0.689148	-0.204495	0.0172119	0.133955	-0.453311	-0.19204	0.108464				181.742	323.565
447	70.9248	74.2836	113.487	173.404	326.372	217.673						0.105268	0.0047513	-0.142114	-0.19742	0.505703	-0.0466982	0.0382483	0.103185				422.465	297.045	76.8325	205.728	256.403	512.25	178.909							-0.111023	-0.0178139	-0.690191	-0.189122	0.0218461	0.179855	-0.460569	-0.181002	0.11343				180.661	319.843
450	58.3311	72.4618	116.41	174.772	333.426	224.55						-0.0909881	-0.0198901	-0.120017	-0.19109	0.538247	-0.0165834	0.016613	0.107691				382.426	303.045	68.578	207.598	253.802	505.468	192.959							-0.195276	0.00202519	-0.723475	-0.18175	0.0114811	0.164235	-0.418207	-0.191567	0.113358				177.687	320.35
453	57.5594	73.5765	111.332	184.883	338.658	219.016						-0.103014	-0.00481285	-0.158407	-0.14429	0.562385	-0.0408178	0.0185072	0.11142				387.796	318.135	77.8424	196.415	255.442	534.257	208.076							-0.183976	0.0519186	-0.686118	-0.225831	0.0180154	0.230543	-0.372628	-0.166868	0.115027				179.29	329.418
456	54.5858	70.5093	116.371	174.943	331.275	220.528						-0.149354	-0.0462994	-0.120317	-0.190298	0.528323	-0.0341982	-0.00202395	0.108844				382.695	293.216	77.6338	190.505	258.534	514.135	212.928							-0.19471	-0.0304749	-0.68696	-0.249123	0.0303368	0.184197	-0.357999	-0.18639	0.108303				178.571	322.809
459	61.4802	63.75	107.895	169.777	316.395	214.803						-0.0419136	-0.137725	-0.184388	-0.214206	0.459673	-0.0592687	-0.0296379	0.101678				395.043	303.983	75.2923	210.18	255.105	498.5	203.006							-0.168727	0.00512472	-0.696401	-0.171574	0.0166711	0.148185	-0.387915	-0.179234	0.108095				179.79	321.911
462	55.4776	72.2388	108.477	174.289	331.494	216.359						-0.135456	-0.0229064	-0.179991	-0.193325	0.529335	-0.052455	-0.00913305	0.111219				373.55	290.627	74.8218	191.674	238.069	507.56	216.425							-0.213955	-0.0390365	-0.698298	-0.244517	-0.051223	0.169053	-0.347456	-0.203633	0.10424				173.274	320.333
465	71.3575	71.4608	112.954	163.178	330.561	219.355						0.112011	-0.0334296	-0.146144	-0.244749	0.52503	-0.0393345	0.0288973	0.110622				394.06	296.585	70.8021	195.632	241.552	517.11	266.452							-0.170796	-0.0193376	-0.714507	-0.228915	-0.0373414	0.191049	-0.196618	-0.168067	0.105931				169.142	328.978
468	64.1596	75.4347	113.248	168.067	336.043	214.346						-0.00015872	0.0203209	-0.143923	-0.222123	0.550319	-0.0612701	0.023861	0.111603				389.082	291.175	73.7438	185.756	237.614	492.722	304.033							-0.18127	-0.0372228	-0.702645	-0.26784	-0.0530355	0.134876	-0.0833059	-0.170063	0.100616				165.312	319.603
471	65.0712	70.3573	109.839	175.629	329.699	222.359						0.0140473	-0.0483554	-0.169689	-0.187124	0.521055	-0.0261754	0.0172929	0.105946				374.473	283.602	69.2061	188.096	239.008	524.798	334.037							-0.212012	-0.0622651	-0.720942	-0.258619	-0.0474796	0.208758	0.00715947	-0.155057	0.110524				169.335	327.73
474	54.6029	69.8937	107.949	168.894	316.96	235.163						-0.149087	-0.054626	-0.183981	-0.218293	0.462282	0.0298959	-0.0189682	0.103143				326.301	303.578	70.399	185.95	239.608	531.658	353.492							-0.313378	0.00378757	-0.716132	-0.267079	-0.0450856	0.224558	0.0658172	-0.149645	0.11776				155.153	322.872
477	63.7335	70.625	103.624	161.927	335.709	225.658						-0.00679892	-0.0447345	-0.216673	-0.250541	0.548781	-0.01173	0.00305059	0.117333				341.404	296.161	75.2562	183.36	234.43	538.032	398.054							-0.281598	-0.0207369	-0.696547	-0.277285	-0.0657228	0.239238	0.200177	-0.128925	0.122189				160.789	325.52
480	60.4828	72.9972	109.1	153.36	335.194	223.938						-0.0574567	-0.0126484	-0.175281	-0.29019	0.546402	-0.0192645	-0.00140631	0.117942				349.522	269.313	71.3038	176.693	240.366	519.953	381.861							-0.264516	-0.10951	-0.712484	-0.303564	-0.0420684	0.197598	0.151351	-0.154742	0.117296				163.918	329.348
483	57.3654	74.834	103.627	150.223	341.041	224.613						-0.106037	0.012196	-0.216647	-0.304712	0.57338	-0.0163066	-0.00968783	0.126444				359.25	278.287	74.9975	189.929	249.32	507.258	399.631							-0.244044	-0.0798396	-0.69759	-0.251395	-0.0063807	0.168358	0.204931	-0.129423	0.116383				161.358	322.699
486	56.6504	77.1129	99.7087	151.935	339.328	237.61						-0.11718	0.0430201	-0.24627	-0.296788	0.565474	0.0406152	-0.00185478	0.12724				331.219	296.155	75.697	180.841	230.147	543.797	407.782							-0.30303	-0.0207574	-0.694769	-0.287215	-0.0827915	0.252516	0.229507	-0.129506	0.125674				154.006	338.89
489	62.1201	70.1362	115.268	150.869	348.435	227.444						-0.0319416	-0.0513459	-0.128651	-0.301722	0.607488	-0.00390689	0.0149868	0.126353				340.708	300.732	67.4524	193.219	240.014	535.467	402.003							-0.283061	-0.00562411	-0.728014	-0.238427	-0.0434688	0.23333	0.212084	-0.121883	0.125767				148.54	328.143
492	66.3694	71.0438	112.154	159.29	333.427	226.925						0.034278	-0.0390699	-0.152196	-0.262743	0.538253	-0.00618204	0.0187234	0.112923				319.136	290.613	71.4631	182.479	241.775	490.893	410.315							-0.328454	-0.0390831	-0.711841	-0.280757	-0.0364507	0.130665	0.237145	-0.146968	0.121341				149.818	325.562
495	57.6623	76.6353	107.853	152.798	328.412	217.005						-0.10141	0.0365601	-0.184708	-0.292793	0.515114	-0.0496237	-0.0128102	0.115222				331.206	275.221	76.0181	177.829	253.283	563.027	400.798							-0.303057	-0.0899767	-0.693474	-0.299086	0.00941109	0.296808	0.208451	-0.124418	0.128506				152.669	321.624
498	66.9314	81.8955	113.836	146.594	346.386	231.962						0.0430361	0.107709	-0.139479	-0.321509	0.598037	0.0158775	0.0506119	0.126334				321.905	280.807	65.9975	179.948	245.257	580.842	394.445							-0.322629	-0.0715058	-0.73388	-0.290733	-0.0225742	0.337841	0.189294	-0.130598	0.134819				151.164	316.368
501	63.1069	67.041	105.635	149.953	329.31	231.82						-0.0165636	-0.0932113	-0.201475	-0.30596	0.51926	0.0152565	-0.0137821	0.117174				337.398	283.146	70.2348	187.389	245.966	581.697	404.433							-0.290027	-0.0637732	-0.716794	-0.261407	-0.0197474	0.33981	0.219411	-0.113218	0.133147				148.663	325.946
504	58.7836	72.7966	104.881	147.052	335.67	239.16						-0.0839365	-0.0153617	-0.207173	-0.319389	0.548597	0.0474021	-0.00497671	0.123189				335.503	268.209	66.8695	178.233	258.925	570.272	409.464							-0.294015	-0.113164	-0.730364	-0.297493	0.031897	0.313496	0.234579	-0.122152	0.135494				144.572	318.931
507	54.2876	72.5625	106.427	145.055	338.795	229.301						-0.154001	-0.0185281	-0.195483	-0.328631	0.563016	0.00422541	-0.0215668	0.127081				346.301	271.751	70.523	170.042	258.612	557.123	400.856							-0.271293	-0.101451	-0.715632	-0.329781	0.0306508	0.283211	0.208626	-0.127953	0.130461				154.813	321.512
510	63.0383	81.8125	107.673	140.807	346.979	224.619						-0.0176327	0.106586	-0.186069	-0.348293	0.600771	-0.0162799	0.0231806	0.132359				331.009	267.578	67.5238	171.008	255.664	581.848	405.669							-0.303471	-0.115247	-0.727726	-0.325972	0.0189009	0.34016	0.223136	-0.127174	0.137483				150.928	314.785
513	66.7612	69.4804	112.046	151.689	337.736	233.323						0.0403837	-0.0602162	-0.15301	-0.297926	0.558133	0.0218407	0.018201	0.119364				342.613	283.52	62.4261	167.916	236.797	595.193	401.194							-0.279053	-0.0625346	-0.748281	-0.338159	-0.0562895	0.370897	0.209643	-0.129111	0.140073				153.373	331.591
516	60.5844	78.7789	113.289	149.788	354.969	239.168						-0.0558734	0.0655542	-0.143616	-0.306726	0.637633	0.0474376	0.040735	0.131782				347.91	282.809	68.3514	165.958	256.954	599.355	418.742							-0.267906	-0.0648875	-0.724389	-0.345874	0.0240396	0.380482	0.262554	-0.10514	0.142866				158.552	325.872
519	56.5383	70.5009	105.375	150.379	348.064	239.057						-0.118926	-0.0464131	-0.203436	-0.30399	0.605779	0.0469519	-0.00333911	0.131555				331.736	289.658	67.8186	169.42	255.921	574.58	413.957							-0.30194	-0.0422395	-0.726537	-0.332231	0.0199255	0.323419	0.248127	-0.115925	0.13833				145.164	335.854
522	58.0515	77.6259	97.8252	151.967	328.037	225.501						-0.0953453	0.0499589	-0.260508	-0.296637	0.513385	-0.0124158	-0.0169271	0.119644				332.492	287.718	69.5993	169.383	252.66	583.382	411.79							-0.300351	-0.0486555	-0.719357	-0.332374	0.00692944	0.343692	0.241591	-0.115504	0.13833				148.718	338.104
525	58.9525	72.305	103.303	151.006	343.728	228.984						-0.0813044	-0.022011	-0.219102	-0.301088	0.585774	0.00283623	-0.00581591	0.127631				347.907	276.32	66.1905	171.079	259.262	584.218	411.854							-0.267914	-0.0863435	-0.733102	-0.325691	0.0332409	0.345618	0.241787	-0.113201	0.13905				147.453	356.256
528	57.3338	68.2836	104.343	155.495	339.511	237.946						-0.10653	-0.076404	-0.211236	-0.280311	0.566322	0.042084	-0.0110124	0.124116				358.482	303.008	72.9811	161.486	257.222	575.447	408.767							-0.24566	0.00190087	-0.70572	-0.363503	0.0251104	0.325415	0.232477	-0.104283	0.135837				152.609	308.868
531	62.9578	66.5951	104.411	155.559	338.792	235.622						-0.0188872	-0.0992424	-0.210722	-0.280012	0.563003	0.0319091	-0.0023253	0.122607				332.83	302.837	69.8941	165.14	253.198	533.378	407.557							-0.29964	0.00133611	-0.718168	-0.3491	0.00907154	0.22852	0.22883	-0.12845	0.130621				151.625	271.733
534	59.5976	72.4534	105.891	151.83	351.714	233.255						-0.0712514	-0.0200038	-0.19954	-0.297274	0.622617	0.0215433	0.00934858	0.131815				367.978	312.431	67.1478	165.271	240.567	569.088	400.122							-0.22568	0.0330589	-0.729242	-0.348585	-0.0412649	0.31077	0.20641	-0.113505	0.134167				147.372	274.512
537	66.3839	75.3078	97.1995	150.301	346.333	238.938						0.034504	0.0186045	-0.265238	-0.304351	0.597794	0.0464281	0.0212903	0.131822				353.52	324.395	69.0829	162.119	251.84	553.382	410.495							-0.256103	0.072618	-0.721439	-0.361006	0.00365989	0.274593	0.237688	-0.107141	0.135683				150.098	274.534
540	58.9617	77.972	93.3831	153.157	356.308	236.894						-0.081161	0.0546402	-0.294088	-0.291132	0.643811	0.0374807	0.0115918	0.140938				340.54	309.52	62.2783	150.316	242.938	526.185	408.625							-0.283415	0.0234349	-0.748877	-0.407528	-0.0318165	0.211951	0.232051	-0.143457	0.134827				146.16	270.012
543	56.4182	70.5756	95.4342	154.825	331.567	226.24						-0.120798	-0.0454027	-0.278583	-0.283411	0.529671	-0.00918113	-0.0346175	0.122206				338.916	289.854	69.5435	172.465	242.369	557.05	400.144							-0.286833	-0.0415918	-0.719582	-0.320228	-0.0340822	0.283042	0.206477	-0.1304	0.129947				147.221	265.087
546	60.6174	73.2183	104.063	147.183	325.117	221.089						-0.0553592	-0.00965782	-0.213357	-0.318781	0.499913	-0.0317378	-0.0214967	0.115246				343.353	299.925	64.7143	162.531	245.284	548.877	409.23							-0.277496	-0.00829313	-0.739054	-0.359383	-0.0224662	0.264217	0.233874	-0.1298	0.134475				142.675	270.31
549	59.6201	73.2799	111.571	163.988	328.353	215.344						-0.0709007	-0.00882462	-0.156599	-0.241	0.514844	-0.0568993	-0.00322995	0.108926				331.933	289.98	67.0057	157.817	245.048	555.04	418.449							-0.301527	-0.0411771	-0.729815	-0.377962	-0.0234083	0.278413	0.261669	-0.133401	0.137153				146.146	277.676
552	55.4063	75.0308	100.43	160.967	324.382	224.386						-0.136567	0.0148578	-0.240819	-0.254985	0.496522	-0.0173012	-0.0230488	0.113362				330.733	303.503	63.1814	165.681	241.5	536.295	402.484							-0.304053	0.00353859	-0.745236	-0.346966	-0.0375474	0.235238	0.213533	-0.140213	0.132103				140.294	278.148
555	59.4828	70.5625	93.8773	150.687	335.473	212.747						-0.0730404	-0.0455799	-0.290352	-0.302562	0.54769	-0.068272	-0.0386859	0.126347				324.6	283.953	61.5764	181.962	254.714	532.228	401.876							-0.316957	-0.0611042	-0.751707	-0.282794	0.0151165	0.225871	0.2117	-0.137125	0.130354				144.181	269.266
558	56.1332	68.0653	104.959	153.479	338.286	213.886						-0.125239	-0.0793567	-0.206586	-0.289641	0.56067	-0.063286	-0.0339065	0.123829				333.207	263.556	65.2832	175.11	254.721	556.192	389.917							-0.298845	-0.128546	-0.73676	-0.309803	0.015142	0.281065	0.175641	-0.143158	0.130132				144.004	257.173
561	62.5765	70.5019	96.4307	159.841	332.03	210.134						-0.0248292	-0.0463995	-0.27105	-0.260195	0.531806	-0.0797183	-0.0250643	0.11963				336.17	268.489	62.0501	183.219	264.689	549.227	402.709							-0.292611	-0.112236	-0.749797	-0.277842	0.0548664	0.265023	0.214212	-0.128341	0.132866				142.412	264.445
564	63.1029	72.2509	98.2816	151.811	336.607	209.874						-0.016626	-0.0227428	-0.257058	-0.297362	0.552922	-0.080857	-0.0202874	0.124511				364.131	280.829	64.6683	172.8	240.543	521.922	387.132							-0.233774	-0.0714331	-0.73924	-0.318906	-0.041363	0.202132	0.167244	-0.147906	0.12202				143.687	263.07
567	64.6675	75.8666	92.5543	154.36	337.746	213.719						0.00775622	0.0261628	-0.300353	-0.285561	0.558179	-0.064016	-0.00963867	0.127489				340.937	270.934	65.1232	162.197	233.495	514.375	408.71							-0.282581	-0.104151	-0.737406	-0.3607	-0.0694506	0.18475	0.232304	-0.162462	0.12656				139.846	266.184
570	61.715	74.7519	95.3222	162.088	341.141	216.768						-0.0382545	0.0110855	-0.279429	-0.249793	0.57384	-0.0506629	-0.00553583	0.125663				359.839	285.13	67.3128	170.58	244.076	485.558	410.878							-0.242805	-0.0572121	-0.728577	-0.327657	-0.0272805	0.118377	0.238842	-0.146616	0.121669				137.435	262.622
573	63.0224	72.2472	93.7237	158.484	340.617	206.54						-0.0178805	-0.0227928	-0.291513	-0.266477	0.571422	-0.0954583	-0.02045	0.127796				389.434	280.724	59.1979	162.281	248.186	526.307	390.445							-0.18053	-0.0717803	-0.761298	-0.360368	-0.0109012	0.212232	0.177233	-0.142202	0.127448				147.318	269.022
576	62.7639	73.4104	94.459	157.313	340.838	218.052						-0.0219088	-0.0070595	-0.285955	-0.271894	0.57244	-0.0450383	-0.00990244	0.127195				365.793	278.859	65.4434	161.711	251.133	534.562	397.718							-0.230278	-0.0779479	-0.736115	-0.362615	0.000843471	0.231245	0.199162	-0.139386	0.128137				146.193	259.938
579	65.6332	73	90.8711	157.359	327.758	206.68						0.0228054	-0.0126105	-0.313077	-0.271683	0.512097	-0.0948434	-0.0262186	0.121054				371.142	272.279	64.5287	157.767	232.047	535.215	380.995							-0.219021	-0.0997045	-0.739803	-0.378161	-0.0752226	0.23275	0.148743	-0.161488	0.124176				143.334	263.842
582	56.5211	77.4384	92.8658	167.266	325.405	210.886						-0.119194	0.0474228	-0.297998	-0.22583	0.501241	-0.0764245	-0.028464	0.116688				372.372	263.505	62.064	157.627	236.744	521.645	384.587							-0.216433	-0.128717	-0.749741	-0.378713	-0.0565008	0.201495	0.159571	-0.167005	0.123728				143.133	257.207
585	53.4591	71.4925	88.6196	159.515	329.303	209.397						-0.166912	-0.0330008	-0.330096	-0.261705	0.519228	-0.0829469	-0.0592389	0.124073				380.209	250.752	61.4704	144.639	233.824	505.823	385.573							-0.199941	-0.170883	-0.752135	-0.429906	-0.0681375	0.165053	0.162544	-0.184772	0.123349				142.411	253.264
588	60.7427	67.4347	87.4404	171.729	326.976	193.264						-0.0534065	-0.0878861	-0.33901	-0.205174	0.508489	-0.153599	-0.0550978	0.119936				380.68	243.238	64.0566	136.592	256.234	480.377	378.808							-0.19895	-0.195728	-0.741706	-0.461622	0.0211717	0.106442	0.142149	-0.189749	0.121603				140.284	248.58
591	59.9617	75.4412	80.1527	167.633	334.902	190.331						-0.0655774	0.0204089	-0.3941	-0.224129	0.545055	-0.166443	-0.0474643	0.131851				384.864	257.719	64.3177	134.876	253.455	469.843	386.788							-0.190147	-0.147846	-0.740654	-0.468387	0.0100962	0.0821808	0.16621	-0.184078	0.121817				152.328	247.881
594	63.2467	74.5653	92.1103	167.43	327.167	192.04						-0.014385	0.00856155	-0.303709	-0.225072	0.50937	-0.158961	-0.0306993	0.118638				368.398	256.263	61.4458	121.179	232.532	487.218	385.808							-0.224795	-0.152661	-0.752234	-0.522373	-0.0732865	0.1222	0.163255	-0.205699	0.125673				142.77	249.282
597	63.5106	79.0448	88.1509	178.859	316.511	181.257						-0.0102725	0.0691507	-0.33364	-0.172171	0.460212	-0.206185	-0.032151	0.114594				380.019	241.497	65.89	138.712	244.889	469.115	372.756							-0.200342	-0.201486	-0.734314	-0.453264	-0.0240416	0.0805033	0.123899	-0.201292	0.1159				139.669	241.273
600	56.7071	68.9515	83.7617	166.882	322.399	171.47						-0.116296	-0.0673701	-0.366819	-0.227605	0.487374	-0.249047	-0.0899605	0.12321				372.641	274.116	64.0796	137.233	248.884	490.212	371.351							-0.215866	-0.0936304	-0.741614	-0.459095	-0.00812109	0.129095	0.119664	-0.181367	0.121196				137.502	254.616
603	52.1557	73.5774	81.0477	167.874	322.308	175.954						-0.187223	-0.00480067	-0.387335	-0.223014	0.486953	-0.22941	-0.0908049	0.125846				388.725	265.034	58.9171	131.902	253.655	468.745	357.3							-0.182021	-0.123659	-0.76243	-0.480109	0.010894	0.0796511	0.0772979	-0.197197	0.119569				144.698	244.925
606	56.8338	75.9879	84.2665	166.97	331.288	170.491						-0.114321	0.0278035	-0.363003	-0.2272	0.528383	-0.253332	-0.0669451	0.130857				380.576	250.563	59.8136	127.67	262	490.092	357.634							-0.19917	-0.17151	-0.758815	-0.496789	0.0441514	0.128818	0.0783064	-0.19643	0.124046				147.778	237.442
609	60.4354	71.3041	80.7458	176.843	340.692	167.465						-0.0581954	-0.0355491	-0.389617	-0.181505	0.57177	-0.266586	-0.0599471	0.137334				386.467	254.082	66.9737	114.788	248.026	489.193	361.64							-0.186772	-0.159875	-0.729944	-0.547564	-0.0115401	0.126749	0.0903849	-0.202652	0.122473				149.349	242.155
612	59.5963	77.3134	81.955	170.632	326.159	177.505						-0.0712716	0.045732	-0.380476	-0.210251	0.504723	-0.222614	-0.055693	0.126732				399.03	248.696	63.8851	119.047	253.91	458.608	380.844							-0.160338	-0.177682	-0.742398	-0.530777	0.0119087	0.0563034	0.148286	-0.199242	0.123209				150.176	239.918
615	60.6821	75.4132	68.5993	167.733	335.239	192.954						-0.0543509	0.0200301	-0.481436	-0.223669	0.546613	-0.154959	-0.057962	0.139977				402.17	251.556	70.3473	124.554	251.986	467.265	360.672							-0.15373	-0.168224	-0.716341	-0.509068	0.00424175	0.0762422	0.0874645	-0.197059	0.116075				150.038	233.906
618	62.3945	72.4412	75.1147	166.815	321.805	188.122						-0.0276654	-0.0201688	-0.432184	-0.227915	0.484633	-0.17612	-0.0665701	0.126385				391.11	249.041	66.2373	114.896	267.333	475.16	372.854							-0.177002	-0.176542	-0.732913	-0.547135	0.0654063	0.0944266	0.124197	-0.192795	0.126062				145.032	232.514
621	55.124	74.0485	69.6046	170.468	328.969	196.51						-0.140966	0.00157137	-0.473837	-0.21101	0.517683	-0.139383	-0.0743236	0.134561				401.746	218.378	68.6388	110.216	272.257	478.527	354.824							-0.154623	-0.27793	-0.72323	-0.565582	0.0850292	0.102181	0.0698346	-0.209189	0.125388				145.374	228.957
624	51.566	68.6325	74.4184	180.243	337.796	185.595						-0.196413	-0.0716848	-0.437448	-0.165765	0.558409	-0.187187	-0.083348	0.137566				406.138	227.799	69.2225	110.098	257.536	485.015	361.788							-0.14538	-0.246777	-0.720876	-0.566047	0.0263618	0.117125	0.0908318	-0.206394	0.124076				139.793	222.744
627	60.6847	69.5672	73.1395	172.571	327.467	201.835						-0.0543104	-0.0590422	-0.447115	-0.201275	0.510756	-0.116061	-0.0611746	0.128938				401.978	221.157	67.3801	118.398	258.504	455.46	353.718							-0.154135	-0.268741	-0.728305	-0.533335	0.0302184	0.049052	0.0664995	-0.219821	0.117549				150.218	217.513
630	58.9288	72.7808	67.4395	169.557	311.164	206.679						-0.0816737	-0.0155754	-0.490204	-0.215226	0.435541	-0.0948491	-0.0769977	0.123377				411.946	208.948	71.5969	122.922	257.507	452.318	357.296							-0.133159	-0.309109	-0.711302	-0.515501	0.0262435	0.0418158	0.0772858	-0.217675	0.115646				151.007	216.903
633	57.9274	70.1455	65.045	179.744	326.558	206.421						-0.0972792	-0.0512202	-0.508304	-0.168077	0.506564	-0.0959794	-0.0690494	0.133656				376.237	223.986	72.0148	133.263	261.607	464.458	369.059							-0.208299	-0.259386	-0.709617	-0.474743	0.042586	0.0697776	0.112753	-0.203847	0.116305				151.174	211.468
636	62.6055	64.7826	66.1077	174.236	324.252	200.05						-0.0243773	-0.123758	-0.500271	-0.193572	0.495924	-0.123881	-0.0783226	0.132682				409.978	232.809	67.3013	153.554	270.72	456.388	352.868							-0.137301	-0.230213	-0.728623	-0.394765	0.0789018	0.0511901	0.0639373	-0.185267	0.112466				152.524	210.597
639	60.0013	70.1017	64.9576	178.715	326.316	205.538						-0.0649602	-0.0518126	-0.508965	-0.172838	0.505447	-0.0998439	-0.0654955	0.133608				416.073	221.129	57.8177	135.706	245.888	453.183	353.58							-0.124475	-0.268835	-0.766863	-0.465114	-0.0200615	0.0438081	0.0660829	-0.219351	0.115682				162.685	209.047
642	56.3813	70.1147	65.5666	178.322	330.47	206.679						-0.121373	-0.0516368	-0.504361	-0.174657	0.52461	-0.0948491	-0.0703778	0.136232				429.55	214.176	60.1929	149.78	247.235	421.238	352.398							-0.0961164	-0.291824	-0.757286	-0.409642	-0.0146913	-0.0297702	0.0625184	-0.219545	0.109468				154.573	204.885
645	60.6675	69.5047	64.5975	186.032	324.712	203.321						-0.0545784	-0.0598875	-0.511687	-0.138974	0.498046	-0.109556	-0.0627728	0.132176				426.738	238.602	63.0189	143.851	263.99	434.28	346.454							-0.102032	-0.211058	-0.745891	-0.433011	0.052081	0.000268516	0.0445966	-0.199292	0.111855				161.981	197.908
648	65.4367	76.2743	65.4431	173.452	327.51	195.065						0.0197432	0.0316773	-0.505295	-0.197198	0.510954	-0.145711	-0.0476383	0.137149				402.791	234.945	60.1502	144.276	255.199	442.563	344.111							-0.152424	-0.22315	-0.757458	-0.431336	0.0170473	0.0193473	0.037534	-0.21292	0.111007				157.258	195.625
651	56.0185	73.6465	57.8252	183.914	341.577	209.533						-0.127027	-0.00386604	-0.562881	-0.148775	0.575851	-0.0823495	-0.0581747	0.1498				385.316	222.314	63.8867	122.181	248.726	441.287	341.963							-0.189195	-0.264916	-0.742392	-0.518421	-0.00874917	0.0164069	0.0310569	-0.239459	0.11189				146.01	193.218
654	53.3905	67.2164	59.9982	196.082	314.896	204.385						-0.167981	-0.0908388	-0.546455	-0.0924581	0.45276	-0.104894	-0.0916445	0.130286				387.536	220.708	66.8456	139.464	237.053	473.698	345.304							-0.184523	-0.270223	-0.73046	-0.450303	-0.0552701	0.0910599	0.0411286	-0.222656	0.110132				141.062	188.813
657	56.3575	70.9963	61.5022	190.869	320.768	196.126						-0.121744	-0.0397123	-0.535085	-0.116587	0.479849	-0.141066	-0.0790577	0.132786				413.473	195.798	64.0345	122.772	247.656	462.17	352.579							-0.129946	-0.352591	-0.741796	-0.516094	-0.0130127	0.064507	0.0630656	-0.232267	0.118371				155.222	187.518
660	53.9367	71.8675	57.0274	200.803	323.774	203.267						-0.159469	-0.0279286	-0.568912	-0.0706085	0.493716	-0.109792	-0.0738324	0.138799				404.684	200.116	67.3243	123.982	252.47	467.105	332.984							-0.14844	-0.338313	-0.72853	-0.511325	0.00617263	0.0758737	0.00398335	-0.234368	0.114436				156.344	183.55
663	56.4789	68.4907	52.7158	195.787	351.895	200.901						-0.119852	-0.0736028	-0.601505	-0.093824	0.623451	-0.120152	-0.0642474	0.160079				388.058	211.058	59.6502	123.828	240.979	468.21	344.519							-0.183425	-0.302133	-0.759474	-0.511932	-0.0396226	0.0784188	0.0387635	-0.239915	0.116508				152.109	185.475
666	58.2731	70.3899	52.5852	194.663	321.187	199.097						-0.0918919	-0.0479144	-0.602492	-0.0990267	0.481781	-0.128052	-0.081266	0.140526				423.237	190.81	59.9647	129.828	254.453	448.738	322.995							-0.109399	-0.369082	-0.758206	-0.488283	0.0140763	0.03357	-0.0261337	-0.243351	0.114326				158.398	175.843
669	53.1609	76.4748	20.1836	196.104	325.298	189.417						-0.171559	0.0343892	-0.847426	-0.0923549	0.500747	-0.170449	-0.124442	0.177404				402.781	190.864	62.6002	134.933	260.433	445.205	320.402							-0.152444	-0.368906	-0.747579	-0.468162	0.0379057	0.0254319	-0.0339531	-0.243958	0.111698				153.732	168.915
672	58.9802	76.3563	71.6372	182.037	319.578	192.018						-0.0808727	0.0327864	-0.458472	-0.157465	0.474361	-0.159056	-0.0581196	0.12552				403.295	187.52	64.6445	124.282	249.864	468.883	327.64							-0.151362	-0.37996	-0.739336	-0.51014	-0.00421309	0.0799696	-0.0121288	-0.24531	0.115415				153.088	161.361
675	54.1491	68.8414	42.5896	196.851	330.168	195.614						-0.156159	-0.0688593	-0.678052	-0.0888975	0.523217	-0.143309	-0.10201	0.155846				377.978	181.218	54.5509	121.347	255.262	458.822	320.027							-0.204637	-0.4008	-0.780036	-0.521709	0.0172996	0.0567949	-0.0350822	-0.266881	0.118455				151.848	160.91
678	58.9182	79.278	70.1562	195.849	328.037	193.164						-0.0818389	0.072305	-0.469667	-0.093537	0.513385	-0.154037	-0.035565	0.131778				410.608	184.555	55.5369	129.74	251.093	459.142	309.638							-0.135975	-0.389766	-0.77606	-0.488631	0.00068366	0.057532	-0.0664068	-0.256946	0.115161				146.16	157.391
681	48.2137	68.5868	75.203	199.766	323.369	201.226						-0.248654	-0.0723029	-0.431517	-0.0754062	0.491849	-0.118731	-0.0757935	0.126556				410.471	173.049	54.8851	129.589	262.258	478.958	315.296							-0.136262	-0.427812	-0.778688	-0.489223	0.0451813	0.103175	-0.0493467	-0.247568	0.122802				154.857	153.674
684	57.0303	71.2537	70.3513	198.715	309.741	206.01						-0.111259	-0.0362308	-0.468192	-0.0802702	0.428976	-0.0977776	-0.0607923	0.117011				413.994	174.832	61.1338	125.181	265.801	467.023	319.163							-0.128848	-0.421914	-0.753492	-0.506597	0.0592996	0.0756855	-0.0376888	-0.244794	0.120535				158.597	148.369
687	52.496	67.6483	68.3663	195.777	331.046	196.694						-0.18192	-0.084997	-0.483198	-0.0938679	0.527265	-0.13858	-0.0758829	0.134818				402.626	163.586	60.5213	140.277	240.308	465.348	303.728							-0.15277	-0.459099	-0.755962	-0.447097	-0.0422999	0.0718275	-0.0842279	-0.26709	0.111288				148.403	140.843
690	55.9103	71.8694	70.662	200.539	331.775	200.906						-0.128713	-0.0279029	-0.465844	-0.0718308	0.53063	-0.120132	-0.0472987	0.131921				394.086	160.171	57.6585	123.78	257.371	453.03	310.794							-0.170741	-0.470392	-0.767505	-0.512121	0.0257026	0.043455	-0.0629228	-0.273504	0.117982				148.494	140.161
693	51.2441	75.0429	69.1342	201.096	335.235	204.9						-0.201429	0.0150215	-0.477393	-0.0692496	0.546593	-0.10264	-0.0481829	0.137704				409.581	170.873	64.8612	138.639	248.176	472.27	298.22							-0.138135	-0.435005	-0.738462	-0.453555	-0.0109427	0.0877701	-0.100833	-0.255595	0.111274				148.834	142.187
696	58.6966	72.3582	75.6911	200.566	325.393	201.454						-0.0852922	-0.0212914	-0.427827	-0.0717021	0.501188	-0.11773	-0.0371091	0.12284				414.338	161.197	58.4097	133.804	244.265	470.277	308.967							-0.128125	-0.466997	-0.764476	-0.472609	-0.0265284	0.083179	-0.0684317	-0.263427	0.116377				155.58	137.72
699	57.1517	71.3162	70.9673	200.229	342.82	211.077						-0.109367	-0.0353854	-0.463536	-0.0732633	0.581588	-0.0755889	-0.0292588	0.138114				387.376	147.994	60.298	132.525	249.38	478.565	290.526							-0.184861	-0.510656	-0.756862	-0.477654	-0.00614358	0.102269	-0.124032	-0.279706	0.116922				153.177	136.156
702	53.6412	74.0131	80.2074	199.09	331.402	213.155						-0.164074	0.00109255	-0.393687	-0.078536	0.528908	-0.0664856	-0.028797	0.124802				412.365	144.544	58.1322	145.948	250.987	455.607	291.646							-0.132278	-0.522063	-0.765595	-0.424744	0.000261616	0.0493899	-0.120657	-0.273669	0.114364				146.232	131.011
705	55.3338	67.0149	79.5958	199.868	331.863	209.433						-0.137697	-0.0935643	-0.39831	-0.0749351	0.531038	-0.0827879	-0.0427095	0.125152				409.176	166.912	55.2611	152.175	239.075	476.707	298.772							-0.138988	-0.448102	-0.777172	-0.400202	-0.0472122	0.0979891	-0.0991684	-0.258979	0.113015				145.494	136.216
708	55.5053	73.1716	71.4563	199.791	337.745	205.005						-0.135024	-0.0102895	-0.459839	-0.0752919	0.558173	-0.102178	-0.0374084	0.135285				429.763	153.37	56.5476	152.24	239.809	477.543	289.173							-0.0956679	-0.49288	-0.771985	-0.399947	-0.0442874	0.099916	-0.128112	-0.261852	0.115098				146.123	129.959
711	54.4617	68.7397	76.1315	195.911	341.805	207.804						-0.151287	-0.0702348	-0.424498	-0.0932496	0.576902	-0.0899195	-0.0420478	0.135032				408.551	155.803	58.4122	155.508	255.705	472.28	290.139							-0.140302	-0.484836	-0.764466	-0.387065	0.0190655	0.0877932	-0.125198	-0.25643	0.114687				149.07	129.831
714	55.2361	70.0336	75.4095	204.016	330.984	213.644						-0.139219	-0.0527337	-0.429956	-0.0557365	0.526982	-0.0643458	-0.0358348	0.127053				408.368	161.099	54.7455	159.053	242.808	459.925	284.032							-0.140687	-0.467324	-0.779251	-0.373091	-0.0323366	0.0593361	-0.143612	-0.268138	0.109818				147.303	129.46
717	58.3839	74.3694	76.9488	198.978	342.877	208.417						-0.0901653	0.00591183	-0.41832	-0.0790553	0.581851	-0.0872379	-0.0145025	0.133455				423.394	152.859	59.9778	168.286	250.506	441.885	280.293							-0.109068	-0.494569	-0.758153	-0.336699	-0.00165372	0.017785	-0.154886	-0.262463	0.107654				145.468	123.211
720	54.1359	73.6912	79.2657	207.742	329.383	203.144						-0.156365	-0.00326143	-0.400806	-0.038493	0.519596	-0.110328	-0.0316094	0.124197				394.11	148.309	57.9376	168.082	260.093	444.3	269.256							-0.17069	-0.509614	-0.76638	-0.337505	0.0365515	0.0233474	-0.188163	-0.273208	0.10964				152.802	130.949
723	56.7995	71.6175	82.9188	213.148	333.006	200.821						-0.114856	-0.0313101	-0.373191	-0.0134697	0.536308	-0.120502	-0.0195035	0.122948				404.671	152.771	53.0534	180.12	250.204	439.31	272.319							-0.148467	-0.494859	-0.786074	-0.290054	-0.00285888	0.011854	-0.178928	-0.269913	0.108141				149.976	125.173
726	58.9103	73.6054	75.9515	202.186	336.956	201.197						-0.081962	-0.00442195	-0.425859	-0.0642051	0.554532	-0.118857	-0.0234622	0.130454				387.699	145.629	61.1667	203.458	259.892	424.182	260.879							-0.18418	-0.518477	-0.753359	-0.198067	0.0357484	-0.0229907	-0.213421	-0.264964	0.10527				154.126	120.702
729	53.686	68.6231	84.5287	206.72	331.739	199.645						-0.163376	-0.071812	-0.361021	-0.0432209	0.530466	-0.125653	-0.0391028	0.122755				381.312	155.024	52.6256	213.956	258.172	439.29	260.437							-0.19762	-0.487412	-0.787799	-0.156691	0.0288949	0.011808	-0.214755	-0.257654	0.109566				150.846	124.257
732	52.1741	70.5989	83.9029	206.978	321.675	192.747						-0.186937	-0.0450875	-0.365752	-0.0420282	0.484035	-0.155862	-0.0519385	0.117603				387.579	150.166	54.8259	265.611	242.884	416.343	266.064							-0.184432	-0.503473	-0.778927	0.0469087	-0.032033	-0.0410447	-0.197788	-0.241541	0.11232				147.244	129.545
735	53.9208	72.8274	83.4122	207.866	316.999	190.274						-0.159717	-0.0149451	-0.369461	-0.0379187	0.46246	-0.166696	-0.0477129	0.114261				392.174	148.726	55.5082	332.43	251.748	435.448	279.144							-0.174765	-0.508236	-0.776176	0.310275	0.00329444	0.00295944	-0.15835	-0.185857	0.135476				151.396	127.692
738	57.2599	69.5354	85.4687	206.694	329.249	191.409						-0.107681	-0.0594723	-0.353915	-0.0433427	0.518978	-0.161722	-0.0345259	0.119806				392.787	148.345	54.5813	342.911	240.194	437.323	258.725							-0.173474	-0.509495	-0.779913	0.351584	-0.042753	0.00727809	-0.219916	-0.195241	0.138441				144.556	132.993
741	56.3391	74.7985	91.4192	207.971	346.299	193.718						-0.122031	0.0117158	-0.308933	-0.0374327	0.597637	-0.151612	-0.00177613	0.128063				393.677	153.622	54.7947	329.271	239.208	435.443	247.781							-0.171602	-0.492045	-0.779053	0.297822	-0.0466818	0.00294792	-0.252913	-0.205932	0.13242				145.338	124.569
744	50.1794	73.8321	88.3292	213.304	332.627	188.025						-0.218021	-0.00135563	-0.332292	-0.0127481	0.53456	-0.176544	-0.0344001	0.124892				383.084	149.558	60.8645	357.001	275.137	446.285	261.07							-0.193892	-0.505484	-0.754578	0.407123	0.0965065	0.0279194	-0.212845	-0.162179	0.146347				144.511	130.761
747	51.5435	69.9907	82.0918	219.565	338.561	187.714						-0.196764	-0.053314	-0.379442	0.0162297	0.561938	-0.177907	-0.0382098	0.13222				399.557	145.243	55.3555	344.483	270.171	489.043	245.94							-0.159228	-0.519751	-0.776792	0.357782	0.0767134	0.126404	-0.258464	-0.164762	0.148448				152.242	128.973
750	49.0092	74.5429	85.2763	212.377	319.701	198.782						-0.236257	0.00825857	-0.35537	-0.0170377	0.474927	-0.129432	-0.0424852	0.117465				384.813	139.093	54.0985	359.197	251.826	443.963	248.786							-0.190253	-0.540088	-0.78186	0.415776	0.0036033	0.0225719	-0.249884	-0.188591	0.14849				138.427	123.501
753	58.9208	75.0784	81.9338	209.256	346.645	195.217						-0.0817984	0.0155017	-0.380637	-0.0314824	0.599234	-0.145046	-0.00403794	0.13327				421.011	144.701	54.3128	350.376	264.616	440.733	235.283							-0.114083	-0.521545	-0.780996	0.381007	0.0545782	0.0151323	-0.290596	-0.1795	0.146568				154.393	129.738
756	55.2164	78.1054	84.0053	224.236	332.026	196.621						-0.139526	0.0564445	-0.364977	0.0378512	0.531786	-0.138897	-0.00288652	0.123738				409.884	145.956	52.959	348.319	274.748	470.065	238.232							-0.137497	-0.517393	-0.786455	0.3729	0.0949562	0.0826914	-0.281703	-0.1675	0.14984				160.625	129.577
759	55.0884	72.417	85.925	216.008	342.981	195.062						-0.141521	-0.0204961	-0.350466	-0.000232993	0.582331	-0.145726	-0.0126852	0.129442				428.828	143.393	52.8333	349.918	260.367	477.98	242.937							-0.0976346	-0.525867	-0.786962	0.379205	0.037643	0.100922	-0.267517	-0.165744	0.149606				160.005	129.234
762	56.9894	69.0821	89.7688	221.897	337.403	199.787						-0.111897	-0.0656036	-0.321409	0.0270222	0.556595	-0.125032	-0.00672065	0.121932				415.389	145.058	54.0008	343.257	262.429	492.725	242.183							-0.125914	-0.520363	-0.782254	0.352947	0.0458611	0.134884	-0.269792	-0.166376	0.148199				155.666	127.32
765	57.4011	71.6091	89.5508	222.673	336.838	199.473						-0.105481	-0.0314237	-0.323057	0.0306156	0.553986	-0.126406	-0.000294385	0.121147				378.505	144.505	62.0386	340.758	257.859	515.838	244.631							-0.203528	-0.522193	-0.749844	0.343099	0.0276491	0.18812	-0.262411	-0.168444	0.146425				146.743	126.353
768	50.5409	72.6343	87.5675	225.753	333.789	202.264						-0.212388	-0.0175569	-0.33805	0.0448692	0.539923	-0.114183	-0.016231	0.124456				385.116	128.765	53.1248	351.359	243.921	504.547	229.374							-0.189616	-0.574236	-0.785786	0.384883	-0.0278982	0.162112	-0.308413	-0.191279	0.1541				143.323	125.764
771	50.6557	69.7491	87.9576	218.608	348.852	198.903						-0.210599	-0.0565818	-0.335101	0.0118003	0.609413	-0.128905	-0.0183288	0.134904				380.789	133.434	54.9187	369.979	254.611	529.207	241.529							-0.198722	-0.558797	-0.778553	0.458275	0.0147044	0.218911	-0.271762	-0.15942	0.162715				140.993	130.874
774	57.7243	65.6604	90.0371	231.228	334.752	205.131						-0.100444	-0.111885	-0.319381	0.0702128	0.544365	-0.101628	-0.00312673	0.120574				393.744	121.9	56.6002	273.53	243.994	531.343	225.075							-0.171461	-0.596936	-0.771773	0.0781192	-0.0276101	0.223832	-0.321373	-0.226743	0.136428				147.303	124.081
777	53.843	71.792	92.1253	225.005	339.899	207.024						-0.160929	-0.0289498	-0.303596	0.0414081	0.56811	-0.0933395	0.00378391	0.122746				383.293	143.177	57.1125	297.97	263.229	545.228	225.953							-0.193451	-0.526582	-0.769707	0.174451	0.0490482	0.255814	-0.318728	-0.189879	0.142649				147.252	125.614
780	56.2256	77.9562	88.8994	221.742	328.909	200.45						-0.123799	0.0544265	-0.327981	0.0263075	0.517407	-0.122127	0.00403891	0.116773				389.714	125.552	61.2184	303.052	260.638	569.975	224.959							-0.179941	-0.584861	-0.753151	0.19448	0.0387242	0.312812	-0.321725	-0.184809	0.149863				149.762	127.787
783	44.5066	69.334	86.6425	219.103	330.453	199.677						-0.306424	-0.0621964	-0.345042	0.0140942	0.524531	-0.125512	-0.0500915	0.128173				375.353	119.555	60.7824	321.62	257.207	554.642	232.366							-0.210159	-0.60469	-0.754909	0.267669	0.0250487	0.277495	-0.299392	-0.185562	0.152564				144.55	127.313
786	60.3799	66.4543	89.5666	223.815	335.184	197.063						-0.0590603	-0.101147	-0.322938	0.0359031	0.546356	-0.136961	-0.00630773	0.120599				377.94	119.897	60.1059	304.67	262.233	579.647	244.168							-0.204716	-0.60356	-0.757637	0.200857	0.045078	0.335089	-0.263806	-0.178385	0.152886				142.925	130.845
789	48.9763	68.0289	84.4034	226.394	334.533	195.843						-0.23677	-0.079849	-0.361968	0.0478369	0.543353	-0.142306	-0.0382838	0.129413				382.957	124.922	57.5969	317.803	238.371	568.423	234.94							-0.194159	-0.586944	-0.767754	0.252623	-0.0500183	0.309238	-0.29163	-0.189806	0.151693				144.284	127.598
792	55.5963	74.6707	88.1421	222.363	340.319	202.706						-0.133606	0.00998717	-0.333706	0.0291799	0.570048	-0.11225	0.00494219	0.124843				381.572	132.965	56.7151	322.013	269.408	574.108	226.256							-0.197073	-0.560347	-0.771309	0.269216	0.0736758	0.322332	-0.317812	-0.16876	0.156692				150.095	126.317
795	56.7018	80.3004	88.3398	227.006	329.899	197.29						-0.116379	0.0861338	-0.332212	0.0506723	0.521975	-0.135969	0.0123704	0.118873				365.469	120.674	54.8235	327.259	265.008	569.092	215.527							-0.230958	-0.600989	-0.778937	0.289893	0.0561385	0.310778	-0.350163	-0.18632	0.160702				141.668	123.741
798	56.9868	70.9953	86.4466	224.576	341.981	192.827						-0.111937	-0.0397259	-0.346523	0.0394234	0.577717	-0.155515	-0.00609331	0.128252				383.686	134.9	61.5107	333.124	280.066	582.305	217.255							-0.192625	-0.553952	-0.751972	0.313012	0.11615	0.341212	-0.344952	-0.153304	0.16123				143.924	129.583
801	48.3918	67.958	89.6796	228.767	340.845	202.571						-0.245879	-0.080808	-0.322084	0.0588205	0.572473	-0.112838	-0.0217192	0.130615				385.851	124.034	60.7241	327.721	276.921	561.04	209.123							-0.18807	-0.589878	-0.755144	0.291716	0.103617	0.292232	-0.369472	-0.173571	0.158897				154.646	128.413
804	56.0013	75.111	89.8067	227.115	331.805	202.13						-0.127295	0.0159426	-0.321123	0.0511768	0.530768	-0.114769	0.00578343	0.117882				396.748	118.566	53.0353	327.918	245.178	558.14	223.045							-0.16514	-0.60796	-0.786147	0.292492	-0.0228883	0.285553	-0.327496	-0.190227	0.157093				137.053	126.326
807	54.1926	62.6576	89.0989	238.98	339.731	202.753						-0.155481	-0.152501	-0.326473	0.106091	0.567334	-0.11204	-0.0121784	0.128945				392.963	115.759	55.5082	317.593	255.778	572.378	226.782							-0.173105	-0.617242	-0.776176	0.251796	0.019354	0.318348	-0.316226	-0.18475	0.157328				142.176	122.146
810	53.3285	65.486	83.5499	230.925	322.557	208.448						-0.168947	-0.114244	-0.36842	0.06881	0.488103	-0.0871026	-0.0303	0.118657				401.2	129.212	54.0304	331.317	275.978	576.283	207.819							-0.155771	-0.572759	-0.782135	0.305889	0.0998581	0.327342	-0.373403	-0.164426	0.163658				143.817	125.83
813	46.7968	66.9767	88.8826	237.48	352.231	203.085						-0.270735	-0.094081	-0.328108	0.0991467	0.625002	-0.110587	-0.013227	0.141591				387.441	119.473	55.1502	310.908	266.587	541.387	219.334							-0.184723	-0.604959	-0.777619	0.225446	0.0624305	0.246965	-0.338683	-0.195878	0.151707				149.682	125.416
816	46.3945	67.5252	90.2763	228.675	344.873	212.722						-0.277004	-0.086662	-0.317573	0.0583933	0.591058	-0.0683837	-0.0166952	0.134271				384.095	124.361	50.0575	303.557	268.151	579.018	209.222							-0.191764	-0.5888	-0.798155	0.196472	0.0686659	0.333641	-0.369174	-0.19273	0.15822				148.256	126.174
819	52.4129	71.3899	86.759	220.435	331.517	197.365						-0.183215	-0.0343885	-0.344161	0.0202582	0.52944	-0.135639	-0.0246176	0.122294				384.335	95.4906	56.8514	321.224	262.844	525.132	208.291							-0.19126	-0.684259	-0.77076	0.266106	0.0475139	0.209525	-0.371979	-0.213587	0.15697				142.62	116.791
822	53.7216	74.3265	83.4228	239.148	350.118	205.886						-0.162821	0.00533157	-0.369381	0.106868	0.615256	-0.098322	0.0161553	0.136753				396.632	122.977	59.1667	326.543	267.766	545.153	216.321							-0.165384	-0.593376	-0.761424	0.28707	0.0671311	0.255641	-0.347768	-0.17973	0.154789				145.793	128.019
825	51.7256	76.0177	84.8049	227.5	341.823	210.663						-0.193926	0.0282065	-0.358933	0.052955	0.576988	-0.0773989	0.00464863	0.130233				414.499	102.832	54.5517	319.538	265.598	543.402	221.33							-0.127786	-0.659983	-0.780033	0.259459	0.0584914	0.251606	-0.332665	-0.19013	0.158266				149.142	139.571
828	52.1174	66.111	86.5922	227.331	367.634	208.236						-0.18782	-0.10579	-0.345422	0.0521742	0.696064	-0.0880297	0.00352923	0.148401				397.434	121.169	54.5197	324.596	265.731	580.045	211.201							-0.163696	-0.599351	-0.780162	0.279396	0.0590218	0.336006	-0.363206	-0.175999	0.162144				146.37	136.746
831	52.8127	67.1623	89.4148	239.71	344.048	199.394						-0.176985	-0.0915706	-0.324085	0.109471	0.587253	-0.126751	-0.00377787	0.131348				399.002	121.335	51.6576	326.868	270.678	539.017	208.766							-0.160396	-0.598802	-0.791703	0.288352	0.0787372	0.241506	-0.370546	-0.18755	0.158101				145.77	131.896
834	55.3259	72.9459	85.6778	221.775	323.177	207.55						-0.13782	-0.0133423	-0.352334	0.0264589	0.490962	-0.0910319	-0.0128513	0.114361				422.013	114.144	57.5681	317.716	269.892	544.105	207.605							-0.111975	-0.62258	-0.76787	0.25228	0.0756015	0.253226	-0.374049	-0.185052	0.156102				150.627	135.273
837	48.6702	70.8601	86.0379	228.854	351.279	200.721						-0.24154	-0.0415546	-0.349612	0.0592255	0.620612	-0.120941	-0.0123017	0.139605				389.398	107.18	57.5476	309.276	265.326	535.125	211.025							-0.180605	-0.645606	-0.767953	0.219013	0.057405	0.232543	-0.363737	-0.206992	0.152511				150.844	135.219
840	55.3931	73.1353	85.4122	238.978	335.647	207.125						-0.136773	-0.0107805	-0.354342	0.106084	0.548492	-0.0928949	0.00996423	0.124434				391.093	113.785	55.9113	295.247	261.457	526.812	209.914							-0.177038	-0.623767	-0.774551	0.163719	0.041989	0.213395	-0.367087	-0.21762	0.146198				149.263	136.839
843	58.2995	72.1362	83.8614	228.57	337.826	204.878						-0.0914805	-0.0242942	-0.366065	0.0579111	0.558547	-0.102734	0.00531407	0.12499				404.308	95.0063	55.4869	312.082	257.207	507.353	210.819							-0.14923	-0.68586	-0.776262	0.230071	0.0250487	0.168577	-0.364357	-0.221716	0.151648				143.872	135.963
846	51.8799	72.9664	78.9629	225.363	352.131	198.546						-0.191521	-0.013065	-0.403095	0.0430651	0.624542	-0.130465	-0.0117565	0.142295				400.716	111.534	52.4778	296.767	249.225	521.958	208.738							-0.15679	-0.631209	-0.788395	0.169708	-0.0067617	0.202216	-0.370631	-0.22598	0.145913				153.522	136.465
849	54.9208	69.4888	83.534	234.053	339.996	198.491						-0.144133	-0.0601026	-0.36854	0.083288	0.568556	-0.130706	-0.00860632	0.130005				369.471	111.204	57.8908	302.597	266.125	515.302	203.858							-0.222537	-0.632303	-0.766569	0.192688	0.060592	0.186884	-0.385344	-0.223798	0.147242				145.236	141.55
852	50.8799	66.5187	88.9815	235.956	339.784	205.442						-0.207105	-0.100276	-0.327361	0.0920954	0.567577	-0.100265	-0.0125557	0.129079				397.056	102.453	54.1305	304.381	266.328	509.112	202.235							-0.164491	-0.661237	-0.781731	0.199719	0.0614007	0.172627	-0.390239	-0.223422	0.150532				148.997	135.395
855	56.4288	66.8414	77.4095	247.157	351.963	197.809						-0.120633	-0.095911	-0.414837	0.143936	0.623767	-0.133694	0.000437874	0.144166				391.748	108.359	50.1585	308.067	257.327	505.787	188.057							-0.175661	-0.641709	-0.797747	0.214249	0.0255277	0.164968	-0.432988	-0.234766	0.150751				151.622	136.727
858	52.1834	69.6362	85.0212	239.369	334.319	199.304						-0.186792	-0.0581089	-0.357298	0.107892	0.542367	-0.127148	-0.0131813	0.127391				406.331	108.397	60.1002	301.332	265.51	492.667	202.343							-0.144975	-0.641585	-0.75766	0.1877	0.0581411	0.134749	-0.389915	-0.221935	0.143984				144.383	144.941
861	55.1504	68.2295	79.4457	241.413	337.004	198.365						-0.140555	-0.0771357	-0.399445	0.117351	0.554755	-0.13126	-0.0127148	0.132041				396.387	114.033	55.67	281.176	263.111	463.24	203.943							-0.165899	-0.622948	-0.775524	0.108257	0.0485795	0.0669715	-0.385089	-0.246522	0.134383				151.292	136.131
864	53.3404	71.3899	84.4113	229.588	344.986	200.465						-0.168761	-0.0343885	-0.361908	0.0626204	0.591577	-0.122062	-0.00548711	0.132821				408.469	109.328	53.1076	312.11	259.393	466.978	189.277							-0.140475	-0.638506	-0.785856	0.230184	0.0337609	0.0755819	-0.429309	-0.236374	0.146224				147.647	138.322
867	54.3047	75.4478	75.6964	232.913	333.772	198.945						-0.153734	0.0204981	-0.427787	0.0780117	0.539844	-0.12872	-0.0119812	0.131692				392.609	102.212	58.8186	293.89	247.831	497.292	206.336							-0.173848	-0.662035	-0.762828	0.158369	-0.0123176	0.145402	-0.377875	-0.240733	0.140908				144.187	135.47
[truncated: 14 more columns]
