# Supplementary material for: Hugin-AstA circuitry is a novel central energy sensor that directly regulates sweet sensation in Drosophila and mouse
Source: eLife. 2026 May 5;14:RP108551. doi: 10.7554/eLife.108551 (PMC13143273; doi:10.7554/eLife.108551)
Supplement: Figure 2—source data 1. [file elife-108551-fig2-data1.xlsx]

## Sheet: A
		50mM G004-1.tif	50mM G005-1.tif	50mM G007-1.tif	50mM G008-1.tif	50mM G009-1.tif	50mM G010-1.tif						50mM G004-1.tif	50mM G005-1.tif	50mM G007-1.tif	50mM G008-1.tif	50mM G009-1.tif	50mM G010-1.tif							50mM glucose+phlorizin.nd2	50mM glucose+phlorizin001.nd2	50mM glucose+phlorizin002.nd2	50mM glucose+phlorizin003.nd2	50mM glucose+phlorizin004.nd2	50mM glucose+phlorizin005.nd2					50mM glucose+phlorizin.nd2	50mM glucose+phlorizin001.nd2	50mM glucose+phlorizin002.nd2	50mM glucose+phlorizin003.nd2	50mM glucose+phlorizin004.nd2	50mM glucose+phlorizin005.nd2							Peak
	time（sec）	Mean1	Mean1	Mean1	Mean1	Mean1	Mean1						F/F0	F/F0	F/F0	F/F0	F/F0	F/F0	mean	SEM					raw data	raw data	raw data	raw data	raw data	raw data					F/F0	F/F0	F/F0	F/F0	F/F0	F/F0	mean	SEM					50 mM glucose	50 mM glucose+phlorizin
1	0	93.5092	134.38	1136.65	53.9821	218.259	29.0766						0.0582588	-0.188121	0.0534297	0.229757	-0.024055	0.0163504	0.0242699	0.0552987					746.705	644.492	189.751	693.698	740.328	402.388					25.2002	6.40925	0.156595	-0.357992	16.0924	0.799255	8.04995	4.27034					4.38912	0.290168
2	3	76.3006	160.686	1088.44	38.7993	220.343	35.272						-0.136494	-0.0291827	0.00875073	-0.11612	-0.0147386	0.232906	-0.0091464	0.0538526					719.683	651.55	190.192	677.573	737.688	409.072					24.252	6.49038	0.159282	-0.372916	16.0315	0.829141	7.89823	4.13865					4.24516	0.0163959
3	6	88.4693	158	1038.3	28.0968	216.899	24.1533						0.00122139	-0.0454137	-0.0377214	-0.359932	-0.0301349	-0.15574	-0.10462	0.0555363					717.009	667.411	192.481	699.783	733.892	392.576					24.1582	6.67273	0.173233	-0.352361	15.9438	0.755382	7.89184	4.12063					0.28525	0.373714
4	9	77.181	158.908	1122.46	47.3548	220.24	24.4943						-0.12653	-0.0399303	0.0402774	0.0787814	-0.0151983	-0.14382	-0.0344034	0.0361694					712.437	668.127	192.411	718.201	722.721	400.176					23.9978	6.68096	0.172805	-0.335316	15.6859	0.789365	7.83192	4.07966					4.13483	0.0172027
5	12	78.2147	160.644	1065.52	34.7168	218.694	29.5862						-0.114832	-0.0294419	-0.0124969	-0.209123	-0.0221112	0.0341631	-0.0589735	0.0359306					721.991	642.357	196.593	687.294	714.572	395.626					24.333	6.3847	0.198294	-0.363919	15.4978	0.76902	7.80315	4.11691					1.26705	0.132114
6	15	83.8589	162.099	1064.55	35.8566	231.111	41.1379						-0.0509553	-0.0206489	-0.0133953	-0.183157	0.0334136	0.437944	0.0338669	0.0861739					700.756	683.704	186.6	737.779	742.248	399.967					23.5879	6.86004	0.137385	-0.317196	16.1367	0.788428	7.86555	4.05538					2.1262	0.206316
7	18	84.2945	173.812	1087.36	43.1183	227.079	33.0805						-0.0460255	0.0501168	0.00774341	-0.0177296	0.0153841	0.156304	0.0276322	0.0289198					699.265	659.635	186.531	711.289	742.598	390.959					23.5356	6.58334	0.136964	-0.341712	16.1448	0.748148	7.8012	4.05571				Mean	2.74127	0.172652
8	21	82.3988	160.241	1064.83	58.2581	241.364	31.4291						-0.0674794	-0.0318749	-0.0131376	0.327168	0.0792585	0.0985803	0.0654191	0.0586239					704.976	673.556	179.884	688.879	761.654	401.34					23.736	6.74338	0.0964505	-0.362452	16.5848	0.794567	7.93212	4.11172				SEM	0.71886	0.0593275
9	24	78.9601	165.436	1108.14	32.7634	220.471	25.5824						-0.106396	-0.000490182	0.0270044	-0.253623	-0.014164	-0.105787	-0.0755758	0.0422276					701.58	668.963	184.438	677.909	746.638	413.588					23.6168	6.69057	0.124209	-0.372605	16.2381	0.849335	7.85774	4.0686
10	27	77.1963	146.363	1134.16	47.0143	213.116	32.6705						-0.126357	-0.115721	0.0511168	0.0710245	-0.0470541	0.141972	-0.00416969	0.0444525					693.236	653.592	185.589	738.684	742.88	393.207					23.3241	6.51387	0.131225	-0.316359	16.1513	0.758201	7.76039	4.02765
11	30	98.3589	171.257	1127.33	46.0143	231.831	28.249						0.113144	0.0346833	0.0447945	0.0482437	0.0366308	-0.0125777	0.044153	0.0164737					722.218	668.006	187.658	708.755	745.775	403.382					24.341	6.67957	0.143833	-0.344057	16.2182	0.8037	7.9737	4.16107
12	33	91.3037	143.271	1075.8	43.7061	206.632	26.751						0.0332988	-0.134404	-0.00297103	-0.00433899	-0.0760469	-0.0649392	-0.0415669	0.0250561					724.344	657.625	183.568	703.219	731.036	403.151					24.4156	6.56023	0.118905	-0.349181	15.8779	0.802665	7.90434	4.152
13	36	75.5552	157.346	1073.47	34.4337	224.604	15.8544						-0.14493	-0.049362	-0.0051309	-0.215572	0.00431578	-0.445822	-0.14275	0.0698686					733.372	636.359	184.946	668.773	746.448	388.36					24.7324	6.31575	0.127307	-0.38106	16.2337	0.73653	7.96076	4.22521				95% confidence interval	-4.176 to -0.9615
14	39	102.046	161.696	1030.33	44.3871	237.428	28.6092						0.154871	-0.0230813	-0.0451075	0.0111748	0.0616601	1.28166e-05	0.0265883	0.0295735					717.207	635.898	189.995	682.31	737.28	406.349					24.1651	6.31044	0.158083	-0.368532	16.022	0.816967	7.85069	4.12921				P value	0.0052
15	42	81.1994	168.492	1065.98	57.3441	221.195	29.3985						-0.0810532	0.0179738	-0.0120696	0.306346	-0.0109276	0.0276022	0.0413119	0.0552351					699.696	634.302	186.969	704.677	748.854	393.321					23.5507	6.2921	0.139634	-0.347832	16.2893	0.758713	7.78043	4.07051				F, DFn, Dfd	146.8, 5, 5
16	45	82.4969	190.558	1064.87	46.2903	246.814	30.2069						-0.0663692	0.15129	-0.0130972	0.0545312	0.103627	0.0558592	0.0476402	0.0319792					720.054	626.199	182.382	690.789	747.983	384.964					24.265	6.19895	0.111675	-0.360684	16.2692	0.721346	7.86758	4.16803
17	48	80.2301	191.68	1056.91	25.5484	228.293	20.7471						-0.092023	0.15807	-0.0204752	-0.417986	0.0208134	-0.274801	-0.1044	0.085467					724.105	621.124	180.826	692.325	732.092	384.795					24.4072	6.1406	0.102192	-0.359263	15.9023	0.720588	7.81893	4.16391
18	51	111.647	154.185	1068.27	31.7348	206.493	30.8544						0.263529	-0.068464	-0.00994211	-0.277055	-0.0766693	0.0784921	-0.0150182	0.0734119					738.927	605.685	179.881	672.372	749.236	391.25					24.9273	5.96311	0.0964298	-0.377729	16.2981	0.749451	7.94277	4.26123
19	54	109.104	176.436	1048.27	65.5484	232.602	35.4483						0.234751	0.0659684	-0.0284778	0.493247	0.0400779	0.239068	0.174106	0.0775556					755.965	618.247	182.823	707.138	738.745	411.336					25.5251	6.10752	0.114366	-0.345554	16.0559	0.839263	8.04943	4.31548
20	57	87.3712	185.72	1088.65	51.2975	209.364	25.2759						-0.011206	0.122059	0.00894007	0.168599	-0.0638294	-0.1165	0.0180104	0.0444334					750.821	628.797	197.451	705.737	748.591	400.175					25.3446	6.22882	0.203526	-0.34685	16.2832	0.789361	8.08378	4.30112
21	60	115.893	194.644	1048.75	55.5627	223.582	22.908						0.311575	0.175975	-0.0280345	0.265764	-0.000251852	-0.199268	0.0876267	0.0802289					761.001	605.396	184.455	710.373	743.738	393.453					25.7018	5.95979	0.12431	-0.34256	16.1711	0.759304	8.06229	4.35244
22	63	99.1963	195.261	1075.97	44.0824	232.503	25.4751						0.122621	0.179704	-0.00280588	0.00423344	0.0396375	-0.109537	0.0389753	0.0415572					780.836	621.085	178.002	686.438	761.497	400.469					26.3978	6.14015	0.0849767	-0.364712	16.5811	0.790676	8.27167	4.47109
23	66	108.641	183.069	1074.07	38.7634	218.287	36.4368						0.229509	0.106047	-0.00456677	-0.116938	-0.0239307	0.273621	0.0772902	0.062507					768.048	598.512	175.779	678.073	740.417	394.014					25.9491	5.88065	0.0714305	-0.372453	16.0945	0.761812	8.06416	4.38751
24	69	97.5798	209.185	1067.1	39.9247	252.345	28.6092						0.104326	0.263829	-0.011034	-0.0904824	0.128359	1.28166e-05	0.0658351	0.0514033					766.934	641.889	177.811	684.932	696.674	395.401					25.91	6.37932	0.0838143	-0.366105	15.0845	0.768011	7.97659	4.31486
25	72	95.1779	181.931	988.796	39.0609	210.567	30.4713						0.0771437	0.099168	-0.0836011	-0.11016	-0.0584479	0.0651011	-0.00179945	0.0376585					723.464	657.894	180.478	697.42	716.307	409.898					24.3847	6.56332	0.100072	-0.354548	15.5378	0.832836	7.84404	4.12622
26	75	84.8896	177.066	919.591	48.1936	212.587	30.6245						-0.0392907	0.069777	-0.147739	0.09789	-0.0494191	0.0704561	0.000279126	0.0388276					773.466	635.863	181.89	679.804	747.854	412.792					26.1391	6.31004	0.108675	-0.370852	16.2662	0.845777	8.21649	4.41006
27	78	93.4509	203.432	981.448	49.8208	201.595	38.6284						0.057599	0.229074	-0.090411	0.134959	-0.0985671	0.350226	0.0971467	0.0725557					746.952	609.925	175.929	682.883	753.986	404.91					25.2088	6.01185	0.0723442	-0.368002	16.4077	0.810532	8.02388	4.30249
28	81	97.7055	196.416	953.517	45.6344	204.493	29.8123						0.105749	0.186682	-0.116296	0.0395893	-0.0856123	0.0420663	0.0286964	0.0466489					771.498	634.186	181.861	669.79	732.807	400.472					26.0701	6.29076	0.108502	-0.380119	15.9188	0.790687	8.13312	4.38378
29	84	96.6933	159.053	882	40.0287	188.893	19.4981						0.0942937	-0.0390531	-0.182578	-0.0881132	-0.155366	-0.318459	-0.114879	0.0571216					771.927	517.058	187.527	656.694	724.539	402.089					26.0852	4.94424	0.143038	-0.392239	15.7279	0.797917	7.88434	4.39728
30	87	96.9295	197.073	917.183	60.1864	211.777	18.0115						0.0969668	0.190651	-0.149971	0.371096	-0.0530383	-0.370422	0.0142137	0.107202					792.19	567.176	168.702	675.442	713.171	415.093					26.7961	5.5204	0.0282909	-0.374888	15.4654	0.856065	8.04857	4.4717
31	90	95.908	193.515	883.583	43.4194	191.991	20.9579						0.0854064	0.169156	-0.181111	-0.0108703	-0.141511	-0.267433	-0.0577271	0.0684052					819.336	559.44	183.075	682.505	702.289	425.685					27.7486	5.43147	0.115902	-0.368352	15.2142	0.903425	8.17421	4.58628
32	93	93.4295	300.561	802.622	35.0645	210.178	16.8314						0.0573568	0.815896	-0.256144	-0.201202	-0.0601909	-0.411671	-0.00932592	0.17773					792.809	574.568	185.008	671.819	680.921	443.543					26.8179	5.60538	0.127681	-0.378241	14.7208	0.983277	7.97947	4.42122
33	96	94.6043	300.502	773.383	42.0753	219.52	14.613						0.0706522	0.815536	-0.283242	-0.04149	-0.0184155	-0.489214	0.00897113	0.181771					822.183	542.432	180.631	661.857	651.692	430.263					27.8485	5.23594	0.101003	-0.387461	14.046	0.923894	7.96132	4.5496
34	99	106.009	299.023	750.904	59.4373	224.216	23.7778						0.199723	0.806603	-0.304075	0.354031	0.00258263	-0.168865	0.148333	0.163789					807.427	545.835	182.092	644.284	649.527	430.198					27.3308	5.27506	0.109908	-0.403725	13.996	0.923606	7.87194	4.4718
35	102	108.663	310.96	739.244	57.4552	228.148	30.3218						0.229752	0.878725	-0.314882	0.308877	0.0201623	0.0598754	0.197085	0.16232					809.542	522.63	184.31	668.723	620.999	428.021					27.405	5.00828	0.123427	-0.381107	13.3374	0.913872	7.73448	4.45745
36	105	121.89	324.274	741.161	45.5591	210.428	21.4253						0.379444	0.959161	-0.313105	0.0378739	-0.0590704	-0.251095	0.125535	0.194544					810.515	527.217	185.363	665.361	636.438	427.308					27.4391	5.06103	0.129846	-0.384218	13.6938	0.910681	7.80838	4.47664
37	108	89.8067	365.429	715.296	51.7204	202.917	26.8276						0.016357	1.20781	-0.337076	0.178233	-0.0926594	-0.0622617	0.151733	0.222019					806.619	526.845	198.639	633.74	633.922	428.789					27.3024	5.05674	0.210766	-0.413483	13.6357	0.917305	7.78491	4.45104
38	111	118.451	386.346	658.657	48.3369	212.97	23.4943						0.340528	1.33418	-0.389568	0.101154	-0.0477052	-0.178775	0.193303	0.249536					784.821	517.473	186.174	640.583	620.588	435.754					26.5376	4.949	0.134789	-0.40715	13.3279	0.948449	7.58176	4.33033
39	114	126.347	390.858	665.9	54.3082	210.64	18.1724						0.429885	1.36144	-0.382855	0.237186	-0.0581224	-0.364798	0.203789	0.26636					798.299	502.153	176.299	656.473	612.486	413.542					27.0105	4.77288	0.074597	-0.392443	13.1408	0.849131	7.57592	4.40281
40	117	137.344	392.224	695.413	39.6272	205.253	22.1686						0.55434	1.3697	-0.355503	-0.0972597	-0.0822131	-0.225113	0.193991	0.267759					810.996	483.885	171.417	655.966	627.422	428.187					27.456	4.56287	0.0448439	-0.392913	13.4857	0.914614	7.67852	4.48609
41	120	150.261	403.924	493.935	38.1936	205.403	27.3065						0.700525	1.44038	-0.54223	-0.129918	-0.0815428	-0.0455221	0.223616	0.293543					811.975	505.941	176.822	623.189	612.827	415.667					27.4904	4.81643	0.0777836	-0.423248	13.1487	0.858631	7.66145	4.47416
42	123	144.009	448.142	640.717	54.5233	194.379	38.1149						0.629775	1.70753	-0.406194	0.242086	-0.130835	0.332277	0.395774	0.301308					852.264	517.002	181.352	636.472	612.537	413.501					28.904	4.94359	0.105396	-0.410955	13.142	0.848945	7.92217	4.67949
43	126	164.896	456.168	676.383	39.5412	215.137	36.5785						0.866151	1.75603	-0.37314	-0.0992188	-0.0380154	0.278574	0.398396	0.321955					859.778	498.613	185.393	645.585	611.546	423.553					29.1676	4.73218	0.130029	-0.402521	13.1191	0.893891	7.94006	4.71864
44	129	139.282	499.198	675	42.3692	226.617	26.59						0.576279	2.016	-0.374422	-0.0347947	0.013316	-0.0705668	0.354302	0.355421					865.849	489.568	185.527	661.381	615.355	420.647					29.3807	4.6282	0.130844	-0.387902	13.2071	0.880901	7.9733	4.75595
45	132	204.715	508.129	719.165	56.2401	217.124	37.1916						1.31679	2.06995	-0.33349	0.281196	-0.0291297	0.300004	0.600887	0.371187					884.122	497.494	184.47	651.668	609.202	399.519					30.0218	4.71932	0.124402	-0.396891	13.065	0.786428	8.05335	4.85088
46	135	197.491	502.974	663.891	48.7276	225.475	42.1149						1.23504	2.03881	-0.384717	0.110055	0.00821269	0.472094	0.579915	0.367301					884.03	522.257	192.762	651.151	611.606	412.825					30.0186	5.004	0.174945	-0.397369	13.1205	0.845925	8.12777	4.84027
47	138	189.739	524.927	630.835	42.2294	229.398	37.1954						1.14731	2.17145	-0.415353	-0.0379794	0.0257539	0.300137	0.531886	0.391527					888.651	519.028	185.697	655.623	589.619	418.003					30.1807	4.96688	0.131884	-0.393231	12.6129	0.869078	8.06138	4.8499
48	141	238.009	471.71	627.404	42.8996	247.6	32.8429						1.69359	1.84992	-0.418532	-0.0227117	0.107141	0.147999	0.559568	0.392463					881.437	520.324	196.169	649.388	615.81	426.787					29.9276	4.98178	0.195715	-0.399001	13.2176	0.908354	8.13867	4.82624
49	144	240.696	504.713	671.009	52.724	251.409	26.1648						1.724	2.04932	-0.378121	0.201096	0.124175	-0.0854293	0.605839	0.415361					882.809	500.514	194.692	638.082	599.683	424.564					29.9758	4.75403	0.186708	-0.409464	12.8453	0.898415	8.04178	4.82747
50	147	251.23	461.429	654.73	44.767	251.565	31.5479						1.84321	1.78781	-0.393207	0.0198292	0.124874	0.102733	0.580875	0.397926					864.63	500.131	188.423	630.489	599.912	442.544					29.3379	4.74963	0.148495	-0.416491	12.8505	0.97881	7.94148	4.7299
51	150	258.362	460.98	625.717	56.5161	254.248	29.9387						1.92392	1.7851	-0.420096	0.287483	0.136871	0.0464845	0.626627	0.400504					853.295	495.913	180.853	623.205	612.153	397.296					28.9402	4.70115	0.102359	-0.423233	13.1331	0.776485	7.87168	4.69442
52	153	253.485	493.36	618.417	67.5448	263.184	36.0843						1.86873	1.98072	-0.426861	0.538726	0.176827	0.261299	0.73324	0.398394					840.507	496.581	180.708	637.085	613.567	410.88					28.4915	4.70883	0.101475	-0.410387	13.1658	0.837224	7.81573	4.62472
53	156	278.414	480.076	596.665	49.5448	250.608	57.2107						2.15086	1.90047	-0.447021	0.128671	0.120593	0.999756	0.808888	0.42983					832.864	487.905	181.585	623.272	623.463	424.42					28.2233	4.60909	0.106816	-0.423171	13.3943	0.89777	7.80135	4.5936
54	159	300.163	500.439	630.148	53.3799	213.46	44.1188						2.39699	2.02349	-0.41599	0.216038	-0.0455123	0.542139	0.786193	0.470716					840.775	473.575	185.216	628.757	614.463	419.486					28.5009	4.44435	0.128952	-0.418094	13.1865	0.875705	7.78638	4.63007
55	162	274.807	493.541	638.587	49.2222	265.91	46.1341						2.11003	1.98182	-0.408169	0.121322	0.189016	0.612582	0.767768	0.425651					819.342	459.108	193.839	644.363	601.711	437.682					27.7488	4.27803	0.181509	-0.403652	12.8921	0.95707	7.60897	4.50273
56	165	299.948	522.498	574.874	56.1577	248.445	40.3487						2.39456	2.15677	-0.467217	0.279319	0.110923	0.410358	0.814119	0.479091					786.054	472.812	186.825	651.139	622.268	418.804					26.5808	4.43557	0.138758	-0.397381	13.3667	0.872658	7.49952	4.35264
57	168	281.046	455.106	697.27	52.1936	247.702	44.931						2.18064	1.7496	-0.353783	0.189013	0.107601	0.570529	0.740601	0.4092					771.969	464.044	183.11	654.451	609.049	419.011					26.0866	4.33477	0.116116	-0.394315	13.0615	0.873583	7.34638	4.27013
58	171	310.561	516.149	608.052	51.6487	221.745	43.3448						2.51467	2.11841	-0.436468	0.1766	-0.00846689	0.515085	0.813305	0.494284					763.839	469.3	191.983	639.847	617.147	434.636					25.8014	4.39519	0.170199	-0.407831	13.2485	0.943448	7.35847	4.22987
59	174	330.528	498.294	659.074	65.8172	271.229	40.2682						2.74063	2.01053	-0.389182	0.49937	0.2128	0.407544	0.913617	0.488445					759.256	461.586	186.982	642.466	609.429	426.436					25.6406	4.30651	0.139716	-0.405407	13.0703	0.906785	7.27641	4.20375
60	177	330.503	519.353	631.991	72.6595	237.604	49.5632						2.74036	2.13777	-0.414281	0.655243	0.0624453	0.732444	0.985663	0.496379					710.686	460.038	188.308	626.63	612.025	425.782					23.9364	4.28872	0.147795	-0.420063	13.1302	0.90386	6.99781	3.96209
61	180	329.408	498.462	603.157	62.7204	235.782	34.3372						2.72796	2.01155	-0.441005	0.428822	0.0542968	0.200231	0.83031	0.50902					698.729	468.636	187.452	619.059	596.402	428.679					23.5168	4.38756	0.14258	-0.427069	12.7695	0.916812	6.88436	3.8817
62	183	374.61	529.677	614.535	49.4803	256.27	47.5977						3.23953	2.20014	-0.43046	0.127202	0.14591	0.663741	0.99101	0.580398					680.295	457.074	188.792	616.637	617.238	426.771					22.87	4.25464	0.150744	-0.429311	13.2506	0.908282	6.83415	3.81887
63	186	371.377	508.485	599.244	57.1792	229.225	38.9502						3.20294	2.07211	-0.444631	0.302589	0.0249781	0.361475	0.919909	0.574328					712.28	448.566	185.637	627.554	603.483	435.178					23.9923	4.15684	0.131517	-0.419208	12.933	0.945873	6.95672	3.96183
64	189	381.092	518.323	639.139	56.8495	250.261	52.5594						3.31288	2.13155	-0.407657	0.295079	0.119042	0.837174	1.04801	0.574369					763.768	463.119	188.374	633.008	610.28	425.687					25.7989	4.32414	0.148196	-0.414161	13.0899	0.903436	7.3084	4.22753
65	192	376.531	543.383	614.913	62.7348	211.739	49.8774						3.26126	2.28295	-0.430109	0.42915	-0.0532105	0.743427	1.03891	0.585842					795.537	462.624	193.326	621.975	608.609	416.74					26.9136	4.31844	0.178384	-0.424372	13.0513	0.863428	7.48347	4.39041
66	195	375.644	469.611	586.804	77.4444	259.066	54.5594						3.25123	1.83724	-0.45616	0.764247	0.158415	0.907082	1.07701	0.53623					822.768	502.814	190.906	632.455	643.996	423.081					27.8691	4.78048	0.163635	-0.414672	13.8683	0.891784	7.85977	4.55414
67	198	406.862	523.489	613.774	54.172	249	43.1762						3.60452	2.16275	-0.431165	0.234083	0.113403	0.509191	1.03213	0.626928					831.785	482.357	193.018	613.6	629.341	429.426					28.1854	4.5453	0.176505	-0.432122	13.53	0.920154	7.82087	4.59059
68	201	419.322	488.789	619.487	81.129	248.957	57.4866						3.74554	1.95311	-0.42587	0.848186	0.113212	1.0094	1.20726	0.60639					865.993	468.707	197.623	623.774	592.827	418.846					29.3857	4.38838	0.204576	-0.422706	12.687	0.872844	7.85263	4.74249
69	204	389.988	638.317	610.939	73.9857	247.595	42.318						3.41355	2.85651	-0.433792	0.685455	0.107122	0.479193	1.18467	0.640063					869.696	506.152	191.764	635.537	621.334	428.435					29.5156	4.81885	0.16886	-0.41182	13.3451	0.915721	8.05873	4.77446
70	207	384.39	695.815	653.744	70.2975	239.786	56.2874						3.3502	3.2039	-0.394122	0.601435	0.0722021	0.967483	1.30018	0.653305					871.303	483.944	206.847	627.814	625.058	423.142					29.572	4.56354	0.260796	-0.418967	13.4311	0.892052	8.0501	4.78867
71	210	447.411	562.591	640.987	73.0143	244.15	46.659						4.06342	2.399	-0.405944	0.663326	0.0917157	0.63093	1.24041	0.684256					874.962	492.456	195.82	620.274	648.043	425.969					29.7004	4.6614	0.193585	-0.425945	13.9618	0.904694	8.16599	4.82946
72	213	421.663	633.904	680.691	60.4982	260.056	57.4713						3.77202	2.82985	-0.369147	0.378199	0.162838	1.00887	1.29711	0.669949					889.286	491.684	197.383	628.04	658.798	419.072					30.203	4.65252	0.203111	-0.418758	14.2101	0.873856	8.28731	4.91494
73	216	437.295	644.112	706.487	53	268.612	33.3755						3.94893	2.89152	-0.34524	0.207384	0.2011	0.166615	1.17839	0.726953					906.2	471.45	195.005	612.122	675.087	436.056					30.7965	4.41992	0.188617	-0.43349	14.5862	0.949798	8.41792	5.0222
74	219	476.19	604.416	655.991	81.4337	252.319	35.4828						4.38912	2.65169	-0.392039	0.855127	0.128244	0.240274	1.31207	0.751128					887.603	498.185	192.483	632.837	691.957	426.011					30.144	4.72726	0.173243	-0.414319	14.9757	0.904883	8.41845	4.93651
75	222	402.451	678.172	645.457	63.638	268.563	37.6935						3.5546	3.0973	-0.401802	0.449726	0.20088	0.317548	1.20304	0.684336					908.016	476.675	206.512	641.187	699.162	426.145					30.8602	4.47997	0.258754	-0.406591	15.142	0.905482	8.53997	5.05031
76	225	439.276	695.937	667.722	75.4588	252.231	40.9004						3.97136	3.20463	-0.381167	0.719014	0.127852	0.429642	1.34522	0.731365					897.268	483.325	202.458	637.104	709.129	433.289					30.4831	4.55643	0.234047	-0.41037	15.3721	0.937426	8.52879	5.00314
77	228	370.012	643.099	699.356	74.5878	229.97	41.1647						3.18749	2.8854	-0.351848	0.699172	0.0283103	0.438881	1.1479	0.616053					911.82	505.441	201.401	625.839	728.655	431.109					30.9937	4.81069	0.227602	-0.420795	15.8229	0.92768	8.72696	5.09328
78	231	413.377	672.228	749.948	84.2222	246.73	37.7816						3.67826	3.06139	-0.304961	0.918651	0.103253	0.320627	1.2962	0.679981					899.541	479.211	205.574	622.285	751.002	428.69					30.5629	4.50913	0.253036	-0.424084	16.3389	0.916861	8.69277	5.06319
79	234	446.028	714.234	720.217	79.681	245.893	46.6284						4.04777	3.31518	-0.332515	0.815199	0.0995095	0.62986	1.42917	0.737145					886.673	501.552	199.133	636.734	746.412	417.965					30.1113	4.76597	0.213777	-0.410712	16.2329	0.868907	8.63036	4.98994
80	237	445.561	657.587	760.887	79.8495	256.471	41.7318						4.04249	2.97294	-0.294823	0.819037	0.14681	0.458703	1.35753	0.709754					888.101	482.426	196.832	623.83	737.226	411.215					30.1614	4.54609	0.199752	-0.422654	16.0208	0.838725	8.55736	4.99532
81	240	416.528	698.637	674.3	73.3262	270.75	31.3295						3.71391	3.22094	-0.37507	0.670431	0.210656	0.0950988	1.256	0.715217					865.474	485.348	193.103	627.625	758.495	410.449					29.3675	4.57969	0.177025	-0.419143	16.5119	0.835299	8.50871	4.90776
82	243	430.595	703.696	702.426	90.1004	276.341	38.3908						3.87311	3.25151	-0.349004	1.05256	0.235656	0.341921	1.40096	0.71179					862.694	513.277	197.295	620.891	761.325	427.167					29.27	4.90077	0.202575	-0.425374	16.5772	0.910052	8.57253	4.88423
83	246	454.632	700.894	725.083	116.133	269.839	34.5785						4.14514	3.23458	-0.328006	1.6456	0.206586	0.208665	1.51876	0.746251					864.704	495.351	196.72	621.794	767.22	432.314					29.3405	4.69469	0.199068	-0.424538	16.7133	0.933068	8.57601	4.90592
84	249	390.313	726.224	781.657	101.179	242.31	42.2452						3.41723	3.38762	-0.275574	1.30495	0.0834908	0.476649	1.39906	0.668885					856.897	488.58	202.719	627.077	765.897	461.773					29.0666	4.61684	0.235637	-0.419649	16.6827	1.06479	8.54115	4.8585
85	252	421.236	705.224	706.761	86.6272	290.531	42.4866						3.7672	3.26074	-0.344986	0.973439	0.299109	0.485087	1.40677	0.691416					844.121	482.851	196.251	620.305	792.583	480.475					28.6183	4.55098	0.196211	-0.425917	17.2988	1.14841	8.56447	4.83186
86	255	428.11	745.845	707.77	101.81	270.822	55.0766						3.84499	3.50616	-0.344051	1.31932	0.210981	0.925161	1.57709	0.705058					865.17	492.314	190.574	633.088	803.679	456.328					29.3568	4.65977	0.161606	-0.414086	17.555	1.04044	8.7266	4.95337
87	258	358.383	612.132	773.7	100.194	273.649	42.6284						3.05588	2.69831	-0.282948	1.28249	0.22362	0.490043	1.24457	0.557991					885.917	473.784	190.44	623.944	782.846	452.199					30.0848	4.44674	0.160791	-0.422549	17.074	1.02198	8.72763	5.03524
88	261	388.641	724.043	759.139	102.531	267.668	32.8889						3.39831	3.37444	-0.296443	1.33573	0.196877	0.149606	1.35975	0.677618					877.169	474.229	113.649	624.172	779.728	429.442					29.7779	4.45186	-0.307275	-0.422338	17.0021	0.920226	8.5704	5.02003
89	264	427.684	747.31	779.017	118.423	284.173	46.2299						3.84017	3.51501	-0.27802	1.69777	0.270681	0.615931	1.61026	0.706093					849.12	465.342	197.639	618.202	802.694	427.286					28.7937	4.3497	0.204671	-0.427863	17.5323	0.910582	8.56051	4.88787
90	267	389.509	771.076	846.783	107.247	278.632	53.5939						3.40814	3.6586	-0.215216	1.44318	0.245901	0.873334	1.56899	0.662889					864.963	496.724	200.269	613.877	791.418	437.455					29.3496	4.71047	0.220701	-0.431866	17.272	0.956055	8.67948	4.93645
91	270	421.595	779.871	807.435	122.383	294.313	47.977						3.77126	3.71174	-0.251683	1.788	0.316018	0.677	1.66872	0.709697					882.369	481.531	195.061	622.274	782.212	446.036					29.9603	4.53581	0.18896	-0.424094	17.0594	0.994422	8.71914	5.01425
92	273	420.549	744.172	899.809	142.717	308.704	43.0766						3.75942	3.49605	-0.166073	2.25121	0.380371	0.50571	1.70445	0.693318					898.538	502.15	206.553	635.394	780.537	413.38					30.5277	4.77284	0.259005	-0.411952	17.0207	0.848407	8.83612	5.08894
93	276	391.169	727.452	867.339	133.502	304.773	49.4291						3.42692	3.39504	-0.196165	2.04128	0.362792	0.727757	1.62627	0.639481					898.87	507.153	213.769	619.315	786.08	424.667					30.5393	4.83036	0.302988	-0.426833	17.1487	0.898874	8.88224	5.09175
94	279	404.181	721.766	866.43	150.62	275.576	46.1034						3.57418	3.36068	-0.197007	2.43125	0.232237	0.611509	1.66881	0.676685					901.102	504.975	217.7	634.105	797.154	429.02					30.6176	4.80533	0.326948	-0.413145	17.4044	0.918339	8.94325	5.11427
95	282	342.613	734.564	865.352	167.735	290.253	56.2797						2.87741	3.43801	-0.198006	2.82114	0.297864	0.967214	1.7006	0.626347					918.944	506.507	211.177	637.374	791.597	439.821					31.2436	4.82293	0.287192	-0.41012	17.2761	0.966635	9.03106	5.19523
96	285	390.899	767.149	1020.69	143.688	300.06	39.8621						3.42387	3.63487	-0.0540448	2.27334	0.341718	0.393349	1.66885	0.674963					917.498	488.443	215.663	636.731	799.364	417.208					31.1929	4.61526	0.314536	-0.410714	17.4554	0.865519	9.00549	5.20709
97	288	382.276	739.69	981.274	167.179	288.3	48.4904						3.32628	3.46897	-0.0905722	2.80848	0.289132	0.694945	1.74954	0.663197					899.629	509.222	214.618	634.045	799.407	419.411					30.5659	4.85415	0.308166	-0.413201	17.4564	0.875372	8.94114	5.11186
98	291	409.135	747.927	926.226	179.265	285.338	64.8506						3.63025	3.51874	-0.14159	3.08381	0.27589	1.2668	1.93898	0.68831					904.282	510.556	218.155	641.159	794.188	426.977					30.7292	4.86949	0.329727	-0.406617	17.3359	0.909203	8.96115	5.12451
99	294	420.101	751.726	1018.59	183.778	289.717	54.9042						3.75435	3.54169	-0.0559911	3.18661	0.29547	0.919135	1.94021	0.710445					903.733	514.132	216.362	624.134	795.845	420.45					30.7099	4.91059	0.318797	-0.422373	17.3742	0.880017	8.96186	5.12589
100	297	350.426	707.043	1073.11	161.419	299.128	70.6552						2.96583	3.27173	-0.00545731	2.67727	0.337552	1.4697	1.7861	0.57158					929.201	531.023	228.077	620.739	788.879	410.264					31.6036	5.10477	0.390201	-0.425515	17.2133	0.834469	9.12014	5.23804
101	300	393.795	755.617	1090.41	187.667	309.413	48.8161						3.45664	3.5652	0.0105761	3.2752	0.383541	0.70633	1.89958	0.692378					918.541	500.459	227.095	626.004	775.959	421.246					31.2295	4.75341	0.384215	-0.420642	16.915	0.883576	8.95752	5.17584
102	303	369.883	784.386	1102.26	163.871	309.833	67.272						3.18603	3.73901	0.0215565	2.73312	0.385417	1.35144	1.90276	0.628578					917.828	514.608	224.696	623.334	785.076	419.354					31.2045	4.91607	0.369591	-0.423113	17.1255	0.875118	9.01128	5.1802
103	306	352.089	768.518	1053.04	175.097	297.636	67.9962						2.98465	3.64314	-0.0240574	2.98885	0.330879	1.37676	1.88337	0.628142					909.126	533.676	233.406	627.693	785.587	427.302					30.8991	5.13527	0.422686	-0.419079	17.1373	0.910654	9.01434	5.12657
104	309	363.905	700.29	1159	225.401	283.773	64.8084						3.11837	3.23093	0.0741413	4.13483	0.26889	1.26533	2.01542	0.696837					908.455	505.586	234.89	625.513	785.932	429.564					30.8756	4.81234	0.431726	-0.421097	17.1453	0.920772	8.96078	5.13115
105	312	332.736	734.505	1110.29	205.495	330.051	53.2184						2.76563	3.43765	0.0289989	3.68134	0.475824	0.860209	1.87494	0.65557					904.81	510.73	230.071	614.269	770.75	429.86					30.7477	4.87148	0.402354	-0.431503	16.7948	0.922095	8.88449	5.09514
106	315	353.739	660.977	1146.54	165	325.499	65.1264						3.00332	2.99341	0.0625928	2.75884	0.455468	1.27644	1.75835	0.544109					912.955	508.984	238.404	617.217	784.918	415.754					31.0335	4.85141	0.453148	-0.428775	17.1219	0.85902	8.9817	5.15388
107	318	348.04	730.716	1194.05	174.025	339.754	61.8008						2.93882	3.41476	0.106623	2.96444	0.519208	1.1602	1.85067	0.582013					906.388	475.745	233.123	615.253	785.859	401.474					30.8031	4.46929	0.42096	-0.430592	17.1436	0.795166	8.86692	5.13799
108	321	344.963	638.792	1243.5	159.004	343.298	56.908						2.904	2.85938	0.152454	2.62223	0.535054	0.989176	1.67705	0.513109					893.33	443.913	238.798	635.584	779.443	417.798					30.3449	4.10334	0.455548	-0.411776	16.9955	0.868157	8.72594	5.06878
109	324	359.969	615.832	1251.26	145.068	364.617	60.1456						3.07383	2.72066	0.159643	2.30477	0.630383	1.10234	1.66527	0.488591					888.077	468.467	237.366	629.118	795.518	410.653					30.1606	4.38562	0.446822	-0.41776	17.3666	0.836209	8.79635	5.05738
110	327	301.816	620.396	1282.2	176.179	397.73	58.4291						2.4157	2.74824	0.188321	3.01351	0.77845	1.04234	1.69776	0.479696					884.292	481.981	245.095	633.191	778.515	409.74					30.0278	4.54098	0.493933	-0.413991	16.9741	0.832127	8.74248	5.00975
111	330	326.534	616.703	1360.02	126.993	402.139	62.9923						2.69544	2.72592	0.260445	1.893	0.798164	1.20185	1.5958	0.414299					864.903	479.178	241.728	647.681	781.182	419.419					29.3475	4.50875	0.473412	-0.40058	17.0356	0.875406	8.64002	4.91619
112	333	342.138	584.957	1323.25	152.237	443.385	44.41						2.87203	2.53413	0.226363	2.46808	0.982597	0.552318	1.60592	0.469386					858.205	485.135	232.623	631.273	793.572	410.281					29.1125	4.57724	0.417908	-0.415766	17.3217	0.834545	8.64135	4.9042
113	336	340.534	593.792	1367.33	133.763	466.366	71.5019						2.85388	2.5875	0.267218	2.04724	1.08536	1.49929	1.72341	0.396119					876.434	480.422	238.847	637.585	794.52	428.225					29.7521	4.52306	0.455846	-0.409924	17.3436	0.914785	8.76324	4.98963
114	339	308.279	501.551	1360.28	105.201	475.54	71.567						2.48884	2.03021	0.260683	1.39656	1.12637	1.50157	1.46737	0.312983					879.925	470.656	238.381	634.872	791.251	423.455					29.8746	4.41079	0.453006	-0.412435	17.2681	0.893455	8.74792	5.00716
115	342	291.877	840.254	1334.33	168.745	477.122	68.2912						2.30322	4.07655	0.23663	2.84416	1.13345	1.38707	1.99685	0.55835					891.236	475.916	240.855	612.601	779.936	420.883					30.2714	4.47125	0.468084	-0.433046	17.0069	0.881954	8.77776	5.04802
116	345	321.209	835.495	1266.92	117.803	478.362	82.1724						2.63517	4.0478	0.174161	1.68365	1.13899	1.87227	1.92534	0.540212					895.281	462.937	249.776	612.861	785.948	408.739					30.4134	4.32204	0.522463	-0.432806	17.1457	0.827652	8.79973	5.0799
117	348	294.328	868.162	1361.71	108.968	491.236	66.5862						2.33096	4.24516	0.262008	1.48237	1.19656	1.32747	1.80742	0.557199					876.009	464.566	237.843	621.849	782.888	406.886					29.7371	4.34078	0.449731	-0.424488	17.075	0.819365	8.66626	4.98373
118	351	312.368	842.356	1353.4	114.244	507	83.1264						2.53512	4.08925	0.254308	1.60257	1.26705	1.90562	1.94232	0.528611					877.937	494.385	247.512	638.481	777.945	411.94					29.8048	4.68358	0.508666	-0.409095	16.9609	0.841965	8.7318	4.97193
119	354	329.77	781.274	1291.51	112.441	506.67	73.6552						2.73206	3.72021	0.196952	1.5615	1.26557	1.57456	1.84181	0.500284					889.303	457.447	246.282	635.676	788.963	406.89					30.2036	4.25893	0.501167	-0.411692	17.2153	0.819384	8.76444	5.05622
120	357	365.258	810.026	1273.26	122.541	496.017	74.1111						3.13368	3.89392	0.180036	1.79159	1.21794	1.5905	1.96794	0.547754					895.709	439.699	251.384	625.697	796.251	407.988					30.4284	4.0549	0.532266	-0.420926	17.3836	0.824295	8.80041	5.1022
121	360	306.985	780.838	1197.35	131.129	488.505	66.705						2.47419	3.71758	0.109681	1.98723	1.18435	1.33162	1.80078	0.504059					876.924	453.488	240.783	615.532	801.03	425.024					29.7692	4.21341	0.46765	-0.430334	17.4939	0.900468	8.73572	5.0111
122	363	305.736	744.419	1153.65	100.491	466.936	81.3678						2.46007	3.49755	0.069181	1.28927	1.0879	1.84415	1.70802	0.484156					876.821	461.044	254.062	628.811	779.41	441.442					29.7656	4.30028	0.548591	-0.418045	16.9947	0.97388	8.69418	4.97057
123	366	321.224	826.178	1212.78	99.8638	426.413	63.8008						2.63534	3.99151	0.123982	1.27498	0.906706	1.23011	1.69377	0.56687					888.576	444.248	252.149	634.236	784.681	410.829					30.1781	4.10719	0.536927	-0.413024	17.1164	0.836997	8.7271	5.04891
124	369	272.764	818.634	1293.11	101.968	382.94	52.2912						2.08691	3.94593	0.198431	1.32291	0.712315	0.827799	1.51572	0.551461					853.346	440.001	253.75	620.602	789.064	410.469					28.942	4.05837	0.546685	-0.425641	17.2176	0.835387	8.52906	4.88283
125	372	302.325	793.746	1328.05	107.613	432.493	65.8046						2.42146	3.79556	0.230816	1.45151	0.933889	1.30015	1.6889	0.512452					809.268	432.211	256.44	633.175	783.896	427.917					27.3954	3.96881	0.563085	-0.414006	17.0983	0.913406	8.25416	4.65884
126	375	265.88	759.531	1386.79	88.0072	418.839	60.9847						2.00901	3.58885	0.28525	1.00488	0.872839	1.13167	1.48208	0.478547					863.37	457.606	256.951	639.637	795.912	429.724					29.2937	4.26076	0.566198	-0.408025	17.3757	0.921484	8.6683	4.92845
127	378	298.344	802.175	1357.55	111.341	415.702	49.6513						2.3764	3.84649	0.258152	1.53643	0.858812	0.735523	1.60197	0.540085					872.232	459.901	248.235	618.055	786.367	420.811					29.6046	4.28714	0.513069	-0.427999	17.1553	0.881632	8.66897	4.96467
128	381	328.549	787.34	1330.26	85.7419	421.887	55.9004						2.71824	3.75686	0.232859	0.953271	0.886464	0.953956	1.58361	0.551203					871.431	441.2	243.386	620.69	799.107	412.142					29.5765	4.07215	0.483517	-0.42556	17.4495	0.842871	8.6665	4.9877
129	384	287.276	774.805	1367.75	120.039	453.747	89.4368						2.25115	3.68113	0.267609	1.7346	1.02893	2.1262	1.84827	0.475453					879.16	450.271	244.544	631.621	805.982	414.142					29.8477	4.17644	0.490573	-0.415444	17.6082	0.851813	8.75989	5.03025
130	387	304.607	754.307	1304.52	97.8889	422.754	69.7548						2.44729	3.55728	0.209008	1.22999	0.890343	1.43823	1.62869	0.48804					872.442	435.979	254.904	638.027	769.659	387.57					29.612	4.01212	0.553718	-0.409515	16.7696	0.732998	8.54515	4.95675
131	390	304.531	755.158	1367.76	90.4229	401.146	60.2222						2.44642	3.56243	0.267617	1.05991	0.793722	1.10502	1.53919	0.500247					883.407	427.939	241.247	625.846	800.317	405.467					29.9967	3.9197	0.470476	-0.420788	17.4774	0.813021	8.70943	5.05491
132	393	299.377	742.139	1310.55	96.3979	389.829	45.8353						2.3881	3.48377	0.214597	1.19602	0.743118	0.602138	1.43796	0.510707					873.739	441.366	244.16	609.415	787.011	406.626					29.6575	4.07406	0.488232	-0.435996	17.1702	0.818206	8.62871	4.98449
133	396	308.607	699.845	1339.14	81.6416	383.068	66.0536						2.49256	3.22824	0.241095	0.859863	0.71289	1.30885	1.47392	0.469702					895.537	441.526	253.024	642.743	803.081	402.62					30.4224	4.0759	0.542261	-0.405151	17.5412	0.800293	8.82948	5.10936
134	399	301.617	727.521	1075.47	84.0681	388.113	69.9502						2.41344	3.39546	-0.00327733	0.915141	0.735449	1.44506	1.48354	0.503818					874.79	424.413	248.161	651.524	789.584	415.399					29.6944	3.87917	0.51262	-0.397024	17.2296	0.857433	8.62937	4.99341
135	402	283.969	668.581	1148.26	88.362	358.812	67.6398						2.21373	3.03936	0.0641885	1.01296	0.604425	1.3643	1.38316	0.444085					867.402	428.149	251.273	652.077	809.473	397.851					29.4351	3.92211	0.531586	-0.396513	17.6888	0.778967	8.66002	4.9859
136	405	286.469	678.053	1159.39	117.018	354.064	44.4444						2.24202	3.09658	0.074504	1.66576	0.583197	0.55352	1.36926	0.47585					865.412	412.47	253.439	608.635	792.477	408.182					29.3653	3.74186	0.544792	-0.436717	17.2964	0.825163	8.55614	4.95787
137	408	311.617	671.838	1095.43	90.5484	359.325	53.6935						2.52662	3.05904	0.0152221	1.06277	0.606723	0.876815	1.35786	0.481157					859.603	422.971	247.58	623.601	791.459	403.785					29.1615	3.86258	0.509077	-0.422866	17.2729	0.8055	8.53145	4.92625
138	411	303.5	681.762	1104.08	87.8208	388.717	31.4291						2.43476	3.11899	0.0232448	1.00063	0.738148	0.0985803	1.23573	0.518023					856.306	416.339	244.065	648.001	803.707	433.298					29.0458	3.78634	0.487652	-0.400285	17.5557	0.937468	8.56878	4.9225
139	414	299.905	699.696	1099.82	84.1255	349.281	32.3487						2.39407	3.22735	0.0192919	0.916448	0.561807	0.130724	1.20828	0.534186					844.581	409.899	248.592	630.492	789.785	415.119					28.6344	3.7123	0.515247	-0.416489	17.2343	0.856179	8.42265	4.852
140	417	290.344	695.865	1123.57	88.7455	337.302	35.7471						2.28587	3.2042	0.041309	1.0217	0.508245	0.249513	1.21847	0.514787					864.885	420.564	254.083	628.573	784.492	428.209					29.3468	3.83492	0.548713	-0.418264	17.1121	0.914709	8.55649	4.93557
141	420	291.819	645.838	975.53	109.796	328.737	35.1992						2.30256	2.90195	-0.0958951	1.50124	0.469945	0.230361	1.21836	0.495094					840.482	408.886	245.024	640.997	800.034	418.983					28.4906	3.70066	0.493499	-0.406766	17.4709	0.873458	8.43706	4.84668
142	423	278.702	696.924	883.774	97.7348	360.848	28.8927						2.15412	3.2106	-0.180934	1.22648	0.613531	0.00992234	1.17229	0.535915					848.322	422.528	246.556	656.052	805.823	422.952					28.7657	3.85749	0.502835	-0.392834	17.6045	0.891204	8.53815	4.88558
143	426	311.362	696.442	901.939	83.5627	336.405	37.4291						2.52373	3.20769	-0.164098	0.903627	0.504233	0.308306	1.21391	0.548018					834.857	416.235	247.115	657.09	815.769	408.558					28.2932	3.78515	0.506243	-0.391873	17.8342	0.826841	8.47563	4.84069
144	429	333.524	692.597	833.017	96.871	353.154	32.023						2.77455	3.18446	-0.227974	1.2068	0.579128	0.11934	1.27272	0.576715					837.974	424.009	237.339	629.2	793.42	406.409					28.4026	3.87452	0.446659	-0.417685	17.3182	0.817235	8.40692	4.82571
145	432	266.564	753.584	777.117	95.405	331.959	37.3218						2.01675	3.55292	-0.279781	1.1734	0.484355	0.304555	1.2087	0.568838					841.202	428.287	249.11	628.572	802.942	409.684					28.5159	3.9237	0.518407	-0.418266	17.538	0.831877	8.48493	4.84872
146	435	310.555	790.571	796.543	96.1183	358.197	27.7586						2.5146	3.77638	-0.261777	1.18965	0.601677	-0.0297193	1.29847	0.640699					833.953	422.466	245.503	648.963	794.245	422.808					28.2615	3.85678	0.496417	-0.399394	17.3372	0.890563	8.40718	4.80028
147	438	280.295	813.753	797.552	78.6774	341.647	30.977						2.17214	3.91644	-0.260842	0.792336	0.527672	0.0827775	1.20509	0.640947					806.592	435.23	235.766	627.451	802.533	423.391					27.3015	4.00351	0.437068	-0.419303	17.5286	0.893167	8.29075	4.68115
148	441	314.73	767.67	711.561	83.6738	359.615	23.3295						2.56185	3.63802	-0.340538	0.906158	0.608016	-0.184535	1.19816	0.646156					828.64	449.25	247.664	634.119	811.783	413.77					28.0751	4.16469	0.509593	-0.413132	17.7421	0.85015	8.48809	4.79307
149	444	305.319	707.954	732.017	103.398	324.274	35.9387						2.45534	3.27723	-0.321579	1.35549	0.449991	0.25621	1.24545	0.567774					837.954	442.761	246.968	622.951	801.605	396.334					28.4019	4.0901	0.505349	-0.423468	17.5071	0.772184	8.47553	4.83018
150	447	367.874	646.201	683.356	81.8136	356.026	32.1647						3.16329	2.90414	-0.366677	0.863781	0.591968	0.124293	1.21347	0.60144					817.072	426.283	237.049	650.043	804.616	410.496					27.6692	3.90066	0.444889	-0.398395	17.5767	0.835508	8.33809	4.73867
151	450	300.801	602.254	762.974	91.5771	326.775	35.4981						2.40421	2.63863	-0.292889	1.0862	0.461174	0.240809	1.08969	0.488342					826.7	421.163	233.741	634.014	801.983	412.513					28.007	3.8418	0.424728	-0.413229	17.5159	0.844526	8.37012	4.78424
152	453	347.485	639.941	677.417	90.914	345.711	16.1379						2.93254	2.86632	-0.372181	1.0711	0.545845	-0.435912	1.10128	0.614067					828.165	436.077	237.908	640.945	794.913	408.999					28.0584	4.01325	0.450125	-0.406815	17.3526	0.828815	8.38274	4.77469
153	456	355.003	596.129	749.97	104.961	347.334	36.9004						3.01763	2.60162	-0.304941	1.39109	0.553103	0.289825	1.25805	0.54149					841.013	423.919	247.905	640.154	801.375	411.663					28.5092	3.87348	0.511061	-0.407547	17.5018	0.840726	8.47146	4.84642
154	459	339.181	602.858	642	84.8136	338.762	33.9579						2.83857	2.64228	-0.405005	0.932124	0.514775	0.186973	1.11829	0.543708					843.995	425.982	242.788	633.441	819.369	397.413					28.6139	3.8972	0.479867	-0.41376	17.9173	0.777008	8.54524	4.89165
155	462	324.945	577.759	703.004	95.595	336.814	34.4789						2.67745	2.49064	-0.348468	1.17773	0.506062	0.205184	1.1181	0.505893					831.881	425.425	233.663	644.963	807.423	402.078					28.1888	3.89079	0.424252	-0.403096	17.6415	0.797868	8.42335	4.81744
156	465	333.543	589.01	726.609	91.9176	345.893	19.3946						2.77476	2.55861	-0.326592	1.09396	0.546659	-0.322077	1.05422	0.556282					861.029	427.603	237.837	658.552	810.112	407.006					29.2115	3.91583	0.44969	-0.390519	17.7036	0.819903	8.61834	4.95795
157	468	335.396	539.911	720.991	72.9498	344.484	19.4444						2.79573	2.26197	-0.331798	0.661857	0.540359	-0.320336	0.93463	0.536475					845.821	436.673	229.774	636.93	838.402	403.629					28.6779	4.02011	0.400543	-0.41053	18.3567	0.804802	8.64159	4.9277
158	471	317.822	537.888	706.861	55.3011	361.101	19.6207						2.59684	2.24975	-0.344894	0.259805	0.61466	-0.314173	0.843665	0.522727					838.484	448.613	236.946	644.214	798.367	368.29					28.4205	4.15737	0.444264	-0.403789	17.4324	0.646786	8.44959	4.83495
159	474	348.853	556.511	715.361	67.0323	351.608	25.023						2.94802	2.36227	-0.337016	0.527051	0.572215	-0.12534	0.9912	0.551083					835.005	440.703	236.016	670.172	802.218	394.317					28.2984	4.06643	0.43859	-0.379766	17.5213	0.763165	8.45136	4.81905
160	477	324.718	520.993	744.822	56.7383	361.507	35.6858						2.67488	2.14768	-0.309712	0.292545	0.61648	0.24737	0.944874	0.484202					838.066	434.679	234.551	640.595	814.857	372.571					28.4058	3.99718	0.429661	-0.407139	17.8131	0.66593	8.48409	4.86172
161	480	365.012	526.36	791.122	62.2939	333.514	24.4598						3.1309	2.1801	-0.266802	0.419106	0.491307	-0.145026	0.968265	0.560934					834.867	425.505	242.398	659.216	798.877	389.486					28.2936	3.89171	0.477493	-0.389905	17.4442	0.741562	8.40977	4.81856
162	483	323.227	534.713	759.017	51.9785	340.422	18.7969						2.65801	2.23057	-0.296556	0.184113	0.522195	-0.342969	0.825894	0.531037					836.28	424.785	235.968	659.257	810.079	390.292					28.3432	3.88344	0.438298	-0.389868	17.7028	0.74517	8.45383	4.8439
163	486	323.163	531.554	803.748	58.2151	348.955	20.751						2.65728	2.21148	-0.2551	0.326188	0.560351	-0.274665	0.870924	0.515159					846.29	413.801	231.927	637.658	798.494	387.82					28.6944	3.75716	0.413668	-0.409857	17.4353	0.734112	8.43747	4.88265
164	489	348.117	502.36	787.078	53.1398	364.814	14.4981						2.93969	2.0351	-0.270549	0.210568	0.631264	-0.49323	0.842141	0.556403					834.521	442.814	239.59	639.342	811.044	388.113					28.2814	4.09071	0.460379	-0.408298	17.7251	0.735423	8.48079	4.8309
165	492	365.141	469.911	829.565	85.6308	373.739	9.9923						3.13236	1.83905	-0.231173	0.95074	0.671172	-0.650727	0.951905	0.565342					833.7	438.452	237.631	641.817	820.875	388.117					28.2526	4.04055	0.448439	-0.406008	17.9521	0.735442	8.50385	4.84365
166	495	337.939	448.017	841.117	56.405	385.068	18.682						2.82451	1.70677	-0.220467	0.284952	0.721833	-0.346985	0.828436	0.501475					842.662	443.613	235.393	633.183	808.338	394.61					28.5671	4.09989	0.434798	-0.413998	17.6626	0.764476	8.51914	4.86602
167	498	314.015	446.779	796.822	74.6129	371.764	23.5287						2.55376	1.6993	-0.261519	0.699743	0.662344	-0.177572	0.862676	0.446181					827.236	440.257	233.984	628.06	824.138	377.317					28.0258	4.06131	0.426209	-0.418739	18.0274	0.687151	8.46819	4.82181
168	501	329.476	475.531	820.848	88.1004	345.268	23.5211						2.72873	1.87301	-0.239252	1.007	0.543864	-0.177838	0.955919	0.478544					842.07	442.095	234.329	661.981	817.988	385.702					28.5463	4.08243	0.428309	-0.387347	17.8854	0.724642	8.54663	4.87865
169	504	316.546	483.353	780.722	74.8351	378.542	22.4483						2.5824	1.92027	-0.276441	0.704805	0.692648	-0.215337	0.901391	0.468348					825.945	447.805	231.589	646.394	810.188	388.097					27.9805	4.14808	0.411609	-0.401772	17.7053	0.735355	8.42985	4.78919
170	507	335.255	454.046	867.052	81.9713	350.799	23.3908						2.79413	1.7432	-0.196431	0.867374	0.568596	-0.182392	0.932413	0.475291					835.793	453.175	219.779	632.548	812.748	367.876					28.3261	4.20981	0.339621	-0.414586	17.7644	0.644937	8.47837	4.84791
171	510	326.644	437.135	842.387	72.7491	378.383	22.8199						2.69669	1.64103	-0.21929	0.657285	0.69194	-0.202348	0.877551	0.459868					841.674	455.832	213.372	636.472	815.907	373.126					28.5324	4.24037	0.300569	-0.410955	17.8374	0.668412	8.52803	4.88055
172	513	356.095	423.842	898.139	72.0896	360.64	27.4674						3.02999	1.56072	-0.16762	0.642261	0.612602	-0.0398979	0.939675	0.487722					822.418	460.633	196.168	651.39	816.765	379.652					27.8568	4.29556	0.195705	-0.397148	17.8572	0.69759	8.41761	4.79192
173	516	319.555	453.482	835.909	81.2366	363.265	17.4138						2.61646	1.73979	-0.225294	0.850637	0.624341	-0.391314	0.869104	0.471097					837.515	430.014	188.438	653.788	802.424	394.602					28.3865	3.94355	0.14859	-0.394929	17.5261	0.764438	8.3957	4.85229
174	519	314.589	402.538	817.735	76.4695	360.735	14.6628						2.56025	1.43201	-0.242137	0.742038	0.613023	-0.487473	0.769619	0.457324					823.924	453.761	185.627	654.735	802.763	373.865					27.9096	4.21656	0.131456	-0.394052	17.5339	0.671717	8.34486	4.78528
175	522	318.359	376.68	888.63	81.957	364.118	13.1303						2.60292	1.27578	-0.176433	0.867048	0.628152	-0.54104	0.776071	0.456774					833.81	470.807	178.356	662.034	815.616	371.088					28.2565	4.41252	0.0871338	-0.387297	17.8306	0.659299	8.47647	4.84878
176	525	285.006	422.304	930.691	89.6057	352.358	26.3257						2.22546	1.55143	-0.137451	1.04129	0.575566	-0.0798052	0.862748	0.380106					831.258	479.19	178.714	666.807	812.26	378.286					28.167	4.5089	0.089319	-0.38288	17.7531	0.691485	8.47115	4.82684
177	528	308.129	399.62	908.126	84.2115	341.644	18.4406						2.48714	1.41438	-0.158364	0.918407	0.527663	-0.355423	0.805635	0.430712					839.419	472.908	172.888	660.432	814.641	379.519					28.4533	4.43667	0.0538071	-0.38878	17.8081	0.696995	8.51002	4.87347
178	531	309.712	373.845	947.052	75.9426	369.437	14.3793						2.50506	1.25865	-0.122288	0.730035	0.651936	-0.497383	0.754335	0.434577					845.963	493.95	168.551	659.579	820.003	381.593					28.6829	4.67858	0.0273699	-0.38957	17.9319	0.706272	8.60625	4.90713
179	534	303.859	374.67	929.087	89.6667	355.666	14.4521						2.43882	1.26364	-0.138938	1.04268	0.59036	-0.494838	0.783621	0.430509					837.153	471.724	170.416	652.303	816.47	373.884					28.3738	4.42306	0.0387382	-0.396303	17.8504	0.6718	8.49357	4.86839
180	537	306.393	327.214	937.226	89.595	366.373	25.1188						2.46749	0.976927	-0.131395	1.04105	0.638234	-0.121991	0.81172	0.392125					841.883	480.961	167.538	641.226	809.694	388.084					28.5398	4.52925	0.0211965	-0.406555	17.6939	0.735294	8.51881	4.87645
181	540	314.613	344.333	1047.58	76.1864	365.833	24.7165						2.56053	1.08035	-0.0291225	0.735589	0.635821	-0.136054	0.807853	0.39885					842.751	486.831	157.671	651.532	810.438	379.586					28.5702	4.59674	-0.0389478	-0.397017	17.7111	0.697298	8.52323	4.88482
182	543	300.613	313.152	977.13	81.6272	375.82	15.2146						2.40209	0.891965	-0.0944123	0.859535	0.680479	-0.468185	0.711912	0.406395					845.865	496.622	171.402	632.192	825.903	374.153					28.6795	4.70929	0.0447488	-0.414915	18.0681	0.673001	8.62662	4.91685
183	546	329.402	301.389	1021.17	96.0574	364.777	18.9808						2.72789	0.8209	-0.0535976	1.18827	0.631101	-0.336541	0.829671	0.443906					833.759	487.395	162.715	659.264	826.797	368.19					28.2547	4.60322	-0.00820302	-0.389861	18.0888	0.646339	8.5325	4.86645
184	549	347.135	304.459	1010.9	92.2366	317.306	32.4368						2.92858	0.839444	-0.0631112	1.10123	0.418834	0.133804	0.89313	0.443666					845.803	488.281	161.838	661.805	814.145	365.612					28.6773	4.61341	-0.0135443	-0.387509	17.7967	0.634812	8.55353	4.90568
185	552	272.077	421.261	1103.89	78.8459	376.278	29.6054						2.07914	1.54512	0.0230635	0.796175	0.682528	0.0348342	0.860143	0.335292					846.739	483.296	169.936	660.55	839.282	364.079					28.7102	4.5561	0.0358131	-0.388671	18.377	0.627957	8.65306	4.94651
186	555	345.15	487.182	1054.83	88.1111	356.878	23.931						2.90612	1.9434	-0.0224013	1.00724	0.595779	-0.16351	1.04444	0.485591					842.541	503.153	164.332	666.194	828.982	351.096					28.5629	4.78438	0.00165372	-0.383447	18.1392	0.569904	8.61243	4.90981
187	558	295.187	519.617	1012.87	85.0538	350.561	36.7931						2.34068	2.13936	-0.0612899	0.937596	0.567533	0.286075	1.03499	0.40477					841.226	503.247	167.103	668.958	823.367	382.966					28.5167	4.78545	0.0185463	-0.380889	18.0096	0.71241	8.6103	4.8863
188	561	344.298	520.644	1039.21	104.079	367.707	23.364						2.89647	2.14556	-0.0368792	1.371	0.644199	-0.183329	1.1395	0.501058					851.767	485.177	164.633	651.347	817.421	363.82					28.8866	4.57772	0.00348841	-0.397187	17.8723	0.626801	8.59495	4.94004
189	564	312.626	498.743	1060.64	83.5663	365.403	28.8123						2.53804	2.01325	-0.0170139	0.903709	0.633897	0.00711202	1.01316	0.430296					841.183	494.516	164.821	640.578	814.413	372.195					28.5152	4.68508	0.00463311	-0.407155	17.8029	0.664248	8.54415	4.88058
190	567	289.38	484.152	1111.83	105.581	360.91	28.6705						2.27496	1.92509	0.0304212	1.40521	0.613809	0.00215551	1.04194	0.396648					842.332	512.277	164.287	658.98	820.179	374.175					28.5555	4.88927	0.00138187	-0.390124	17.936	0.6731	8.61085	4.88789
191	570	310.638	510.766	1055.39	90.276	358.848	35.6437						2.51554	2.08589	-0.0218855	1.05656	0.604588	0.245898	1.0811	0.416694					850.307	514.322	165.087	662.471	814.404	368.264					28.8353	4.91278	0.00625751	-0.386893	17.8026	0.646669	8.63613	4.91805
192	573	318.156	482.327	1049.95	119.276	342.582	25.4751						2.60063	1.91407	-0.0269263	1.71721	0.531856	-0.109537	1.10455	0.460114					837.147	521.453	167.936	677.45	831.024	369.629					28.3736	4.99476	0.0236225	-0.37303	18.1864	0.652773	8.64301	4.87548
193	576	350.896	448.729	986.539	104.405	368.505	29.9847						2.97114	1.71108	-0.0856925	1.37843	0.647771	0.0480924	1.1118	0.471458					853.168	504.419	167.627	682.095	817.724	344.096					28.9357	4.79893	0.0217402	-0.368731	17.8793	0.538604	8.63426	4.94334
194	579	325.586	441.439	1051.67	87.8315	343.767	37.4215						2.68471	1.66703	-0.0253348	1.00087	0.537152	0.30804	1.02875	0.409169					850.693	522.363	166.132	619.883	820.723	329.27					28.8489	5.00522	0.0126277	-0.426307	17.9485	0.472313	8.64354	4.93828
195	582	322.252	424.627	1066.8	81.4158	335.229	33.7471						2.64697	1.56546	-0.0113081	0.854719	0.498976	0.179604	0.955738	0.407776					844.179	522.9	166.968	646.167	821.442	315.564					28.6203	5.01139	0.017724	-0.401982	17.9651	0.411028	8.60394	4.90968
196	585	319.712	453.719	1125.45	95.6487	353.216	26.1188						2.61823	1.74123	0.0430497	1.17896	0.579406	-0.0870372	1.01231	0.427142					848.403	529.616	174.633	640.092	814.448	310.77					28.7685	5.0886	0.0644416	-0.407604	17.8037	0.389591	8.61787	4.91666
197	588	336.034	426.789	1081.11	87.957	372.383	41						2.80295	1.57852	0.00195287	1.00373	0.665111	0.433124	1.0809	0.407253					856.008	533.698	167.649	671.005	820.236	304.848					29.0354	5.13553	0.0218725	-0.378994	17.9373	0.363111	8.68569	4.96253
198	591	345.476	414.248	1088.6	90.9498	351.518	30.1379						2.9098	1.50275	0.00889577	1.07191	0.571813	0.0534474	1.01977	0.44589					828.796	556.122	170.33	680.242	817.172	288.823					28.0806	5.39332	0.0382153	-0.370446	17.8666	0.291455	8.54994	4.82505
199	594	339.933	456.66	1041.98	71.7061	379.627	39.8123						2.84707	1.759	-0.0343083	0.633524	0.697503	0.391609	1.04907	0.433553					835.18	549.244	171.795	653.211	822.273	308.413					28.3046	5.31426	0.0471473	-0.395463	17.9843	0.379049	8.60565	4.86068
200	597	367.951	392.842	1119.32	76.7814	363.91	31.59						3.16416	1.37343	0.0373641	0.749144	0.627223	0.104204	1.00925	0.474466					844.156	546.07	167.299	656.609	834.989	288.6					28.6195	5.27776	0.0197391	-0.392318	18.2779	0.290458	8.68217	4.9294
201	600	318.083	394.3	1097.54	90.8531	361.752	34.2261						2.59979	1.38224	0.0171845	1.06971	0.617571	0.196347	0.980474	0.385835					826.746	552.428	168.583	654.211	805.303	290.742					28.0086	5.35085	0.0275637	-0.394537	17.5925	0.300038	8.48085	4.80038
202	603	344.982	397.393	1154.57	90.2401	381.895	49.2452						2.90421	1.40092	0.0700312	1.05574	0.707643	0.721328	1.14331	0.395584					847.195	556.25	176.56	663.722	830.949	291.336					28.7261	5.39479	0.0761866	-0.385735	18.1846	0.302694	8.71645	4.93073
203	606	320.69	365.37	1151.88	78.9713	363.443	38.6398						2.6293	1.20745	0.067541	0.799031	0.625136	0.350625	0.946514	0.372047					832.074	565.286	176.175	654.448	809.549	283.86					28.1956	5.49867	0.0738424	-0.394318	17.6905	0.269264	8.5556	4.82779
204	609	314.764	359.112	1067.07	93.0394	385.48	34.5632						2.56223	1.16964	-0.0110582	1.11951	0.723671	0.20813	0.962022	0.374194					829.639	555.926	178.63	665.051	819.194	292.048					28.1101	5.39107	0.0888088	-0.384505	17.9132	0.305877	8.57077	4.82918
205	612	327.132	393.898	1091.71	90.7097	364.925	43.7701						2.7022	1.37981	0.0117769	1.06644	0.631761	0.529951	1.05366	0.381315					833.385	569.92	175.891	645.124	804.925	295.913					28.2416	5.55195	0.0721131	-0.402947	17.5838	0.323156	8.56161	4.82378
206	615	343.58	361.304	1059.41	83.2796	363.028	44.4023						2.88835	1.18288	-0.0181582	0.897178	0.623278	0.552049	1.02093	0.407696					843.101	559.72	178.337	655.309	833.384	280.396					28.5825	5.43468	0.0870217	-0.393521	18.2408	0.253773	8.70088	4.9167
207	618	314.936	304.624	1130.02	82.6631	354.649	50.364						2.56418	0.840441	0.0472847	0.883134	0.585811	0.760435	0.94688	0.346672					845.973	602.777	179.161	655.998	830.399	286.738					28.6833	5.92968	0.0920436	-0.392883	18.1719	0.282133	8.79436	4.91361
208	621	350.647	324.429	1114.33	93.2222	386.906	56.4713						2.96833	0.960098	0.0327382	1.12368	0.730048	0.973911	1.13147	0.399861					840.535	574.741	183.028	664.115	831.414	281.649					28.4925	5.60737	0.115613	-0.385371	18.1954	0.259377	8.71414	4.89539
209	624	306.564	277.531	1109.87	79.8387	344.099	46.5862						2.46944	0.676757	0.028608	0.818791	0.538636	0.628385	0.860103	0.340279					842.963	585.698	178.69	635.852	824.342	275.063					28.5777	5.73334	0.0891691	-0.411528	18.0321	0.229927	8.70844	4.8987
210	627	305.478	308.356	1094.25	88.7133	388.644	46.4904						2.45715	0.862992	0.0141301	1.02096	0.737823	0.625037	0.953016	0.332191					861.878	576.739	181.629	661.292	833.365	270.309					29.2413	5.63034	0.107085	-0.387984	18.2404	0.208672	8.83998	5.00268
211	630	292.325	307.97	1055.62	81.9355	403.683	44.6207						2.30829	0.86066	-0.0216679	0.866558	0.805068	0.559683	0.896432	0.314122					853.387	578.026	187.69	653.62	834.272	282.582					28.9434	5.64514	0.144027	-0.395084	18.2614	0.26355	8.8104	4.9584
212	633	330.478	270.634	1064.67	104.165	385.989	57.5977						2.74008	0.635084	-0.0132825	1.37296	0.72595	1.01328	1.07901	0.381432					876.194	563.565	183.629	662.358	830.254	281.765					29.7437	5.47889	0.119276	-0.386998	18.1686	0.259897	8.89722	5.06646
213	636	316.31	255.142	1085.34	87.3333	384.606	46.9502						2.57973	0.541487	0.00587771	0.989525	0.719765	0.641109	0.912915	0.358515					871.624	570.838	182.745	665.687	841.494	278.426					29.5833	5.5625	0.113887	-0.383916	18.4281	0.244967	8.9248	5.05969
214	639	302.948	273.795	1019.74	103.344	395.068	52.6897						2.42851	0.654186	-0.0549192	1.35426	0.766548	0.841728	0.998386	0.340496					859.098	572.697	177.037	672.469	806.827	271.307					29.1438	5.58387	0.079099	-0.37764	17.6277	0.213132	8.71167	4.95349
215	642	283.632	220	1034.45	79.6846	382.57	29.3027						2.20991	0.329171	-0.0412915	0.815281	0.710659	0.0242536	0.674663	0.338282					872.2	584.327	176.412	653.113	826.246	271.148					29.6035	5.71757	0.0752864	-0.395553	18.0761	0.212424	8.88155	5.04222
216	645	323.908	232.221	1015.14	84.3728	377.979	50.6054						2.66572	0.403007	-0.0591824	0.922082	0.69013	0.768873	0.898438	0.380636					853.363	573.189	180.452	643.931	814.581	294.558					28.9426	5.58953	0.0999127	-0.404051	17.8067	0.317101	8.7253	4.93113
217	648	294.15	198.571	967.048	92.509	372.799	44.4751						2.32895	0.199703	-0.103757	1.10743	0.666968	0.554593	0.792314	0.350566					869.081	590.181	174.395	650.685	824.744	292.216					29.4941	5.78488	0.0629909	-0.397801	18.0414	0.306627	8.88202	5.0192
218	651	302.377	224.99	1037.77	89.0143	396.501	43.3448						2.42205	0.359319	-0.0382131	1.02782	0.772954	0.515085	0.843169	0.348831					859.965	557.325	166.115	688.838	833.999	281.653					29.1742	5.40716	0.0125223	-0.362491	18.255	0.259397	8.79097	5.00043
219	654	297.81	235.786	1025.07	113.179	390.692	50.2031						2.37036	0.424542	-0.0499872	1.57832	0.746977	0.754811	0.970837	0.35426					859.06	588.187	180.97	667.107	823.235	282.036					29.1425	5.76195	0.103069	-0.382602	18.0065	0.261106	8.81542	4.96882
220	657	275.522	208.739	1047.01	97.3405	396.281	45.4368						2.11812	0.261137	-0.0296463	1.2175	0.771967	0.588209	0.821214	0.312697					860.172	593.863	176.743	680.577	840.201	274.349					29.1815	5.8272	0.0773015	-0.370136	18.3982	0.226736	8.89013	4.99999
221	660	314.997	201.317	1075.17	89.8064	445.867	64.1839						2.56487	0.216293	-0.00355537	1.04586	0.993694	1.2435	1.01011	0.371078					839.992	603.562	175.133	646.916	841.605	290.966					28.4734	5.93871	0.0674892	-0.401289	18.4307	0.301038	8.80167	4.90283
222	663	309.571	198.64	1088.3	78.1039	404.407	35.2299						2.50346	0.200122	0.00861774	0.779271	0.808304	0.231434	0.755202	0.37415					866.385	628.551	182.966	677.652	830.074	277.848					29.3995	6.22598	0.115236	-0.372843	18.1644	0.242382	8.96245	5.00432
223	666	309.936	172.522	1148.95	86.2903	375.242	25.9349						2.50759	0.0423206	0.0648252	0.965764	0.677894	-0.0934653	0.694155	0.400162					870.628	592.206	176.04	654.98	839.814	283.425					29.5483	5.80815	0.0730171	-0.393826	18.3893	0.26732	8.94872	5.04896
224	669	262.298	190.845	1175.43	95.0107	402.195	37.1877						1.96846	0.153025	0.0893687	1.16442	0.798413	0.299868	0.745593	0.297437					868.587	601.768	179.619	654.325	848.422	282.987					29.4767	5.91808	0.0948365	-0.394431	18.588	0.265361	8.99144	5.04835
225	672	292.902	162.746	1127.2	83.724	399.317	38.1609						2.31482	-0.0167405	0.0446696	0.907302	0.785545	0.333885	0.728246	0.352626					867.625	589.075	180.436	668.949	847.694	299.347					29.443	5.77216	0.0998139	-0.380897	18.5712	0.338511	8.97397	5.04042
226	675	299.592	167.033	1071.6	91.6774	372.807	35.9502						2.39053	0.00916081	-0.00685953	1.08849	0.667007	0.256612	0.734156	0.373113					862.532	604.083	176.677	667.976	848.05	279.751					29.2643	5.9447	0.0769041	-0.381798	18.5795	0.25089	8.95574	5.01968
227	678	280.478	171.495	1088.2	87.6846	401.071	41.9617						2.17422	0.0361194	0.00852905	0.997528	0.793387	0.466739	0.746087	0.328182					885.857	586.726	179.811	659.402	843.948	294.691					30.0827	5.74516	0.096005	-0.389733	18.4847	0.317692	9.0561	5.1246
228	681	301.159	135.432	1151.22	96.5556	427.97	47.9464						2.40827	-0.181761	0.0669285	1.19962	0.913667	0.67593	0.847109	0.376938					861.448	607.449	174.082	681.815	854.286	264.651					29.2262	5.98339	0.0610843	-0.36899	18.7234	0.18337	8.96809	5.02711
229	684	292.54	181.069	1171.06	112.817	377.852	39.9042						2.31072	0.0939637	0.0853191	1.57007	0.689565	0.394821	0.85741	0.367021					858.7	581.15	172.269	665.765	834.858	287.573					29.1298	5.68105	0.0500322	-0.383844	18.2749	0.285865	8.83963	4.98728
230	687	303.42	158.762	1119.01	111.606	388.229	48.5249						2.43386	-0.0408076	0.0370821	1.54247	0.735965	0.696151	0.900786	0.385733					859.922	591.551	169.428	663.131	848.327	276.975					29.1727	5.80062	0.0327142	-0.386282	18.5859	0.238479	8.90735	5.01428
231	690	305.589	193.911	1242.81	100.237	437.574	53.2644						2.4584	0.171549	0.151818	1.28347	0.956611	0.861817	0.980611	0.347935					859.006	580.46	171.725	668.601	840.306	274.58					29.1406	5.67311	0.0467158	-0.381219	18.4007	0.227767	8.85127	5.00024
232	693	289.098	162.069	1260.63	100.892	438.979	51.8353						2.27177	-0.0208283	0.168335	1.29841	0.962892	0.811863	0.915408	0.338331					845.406	583.264	168.871	670.204	858.074	274.105					28.6634	5.70535	0.0293234	-0.379736	18.8109	0.225645	8.84247	4.96336
233	696	267.865	177.98	1296.42	94	432.433	54.8008						2.03147	0.0753003	0.201501	1.1414	0.933621	0.91552	0.883135	0.289033					858.05	595.697	176.56	656.922	850.138	280.035					29.107	5.84829	0.0761903	-0.392028	18.6276	0.252159	8.91988	5.00416
234	699	292.537	178.508	1377.57	107.85	413.818	46.4406						2.31069	0.078491	0.276708	1.4569	0.850386	0.623296	0.932745	0.338435					840.289	599.881	164.421	684.254	838.223	285.092					28.4838	5.89638	0.00219742	-0.366733	18.3526	0.274774	8.77383	4.9032
235	702	277.647	162.865	1349.99	102.194	420.854	46.8697						2.14218	-0.0160228	0.251145	1.32805	0.881849	0.638295	0.870916	0.318857					852.995	591.446	174.51	665.028	854.422	262.233					28.9297	5.79942	0.0636906	-0.384526	18.7266	0.17256	8.88456	4.9927
236	705	265.086	163.624	1424.59	98.4695	406.484	52.249						2.00002	-0.0114365	0.320287	1.24322	0.817592	0.826324	0.866	0.28867					854.173	594.892	176.14	668.404	831.513	276.45					28.971	5.83903	0.0736284	-0.381401	18.1977	0.23613	8.82267	4.95895
237	708	239.328	148.155	1465.24	119.806	396.377	51.341						1.70852	-0.104894	0.357962	1.72929	0.772398	0.794586	0.87631	0.298276					855.635	583.11	162.728	660.308	846.044	282.364					29.0223	5.70359	-0.00812134	-0.388894	18.5331	0.262576	8.85409	4.99383
238	711	262.08	170.924	1445.01	126.409	371.163	51.3065						1.966	0.0326696	0.339209	1.87969	0.659654	0.79338	0.9451	0.327609					845.373	592.133	171.875	680.562	839.733	262.295					28.6622	5.80731	0.0476331	-0.37015	18.3874	0.172836	8.78455	4.93459
239	714	270.574	184.314	1485.9	111.788	377.61	45.2682						2.06213	0.113564	0.377103	1.54663	0.688484	0.582315	0.895038	0.305837					853.775	582.663	178.814	664.786	856.97	280.86					28.957	5.69845	0.0899267	-0.38475	18.7854	0.25585	8.90031	4.996
240	717	285.077	180.475	1451.58	101.254	389.405	42.1149						2.22626	0.090375	0.345302	1.30666	0.741222	0.472094	0.863652	0.320827					861.045	577.727	178.883	668.105	840.608	277.884					29.2121	5.64171	0.0903515	-0.381679	18.4076	0.242542	8.86878	5.00766
241	720	302.199	170.205	1426.43	122.756	377.957	38.5096						2.42004	0.0283226	0.321987	1.79649	0.690035	0.346074	0.933825	0.389538					852.515	564.548	171.535	660.793	849.06	271.968					28.9128	5.49019	0.0455607	-0.388446	18.6028	0.216088	8.81316	4.98773
242	723	316.472	165.168	1473.43	116.767	378.852	51.8736						2.58157	-0.00210512	0.365554	1.66005	0.694037	0.813202	1.01872	0.386012					873.988	580.751	161.288	675.595	851.912	287.271					29.6663	5.67647	-0.0168974	-0.374747	18.6686	0.284516	8.98403	5.08845
243	726	281.35	184.894	1423.14	132.305	371.595	45.1647						2.18408	0.117074	0.318945	2.01401	0.661587	0.578698	0.979066	0.363458					876.437	566.672	166.406	672.595	855.47	262.595					29.7522	5.51461	0.0142997	-0.377523	18.7508	0.174178	8.97142	5.11354
244	729	286.463	207.172	1417.97	131.061	397.651	50.5862						2.24195	0.251666	0.31415	1.98568	0.778095	0.768202	1.05662	0.347761					889.769	559.35	160.156	675.376	840.769	281.721					30.22	5.43044	-0.0237979	-0.374949	18.4114	0.2597	8.98712	5.1553
245	732	273.245	191.696	1367.89	166.914	365.366	46.2031						2.09236	0.158169	0.267734	2.80244	0.633734	0.614994	1.09491	0.444045					875.366	559.161	160.832	665.552	835.591	280.839					29.7146	5.42826	-0.0196768	-0.384041	18.2918	0.255755	8.88111	5.07931
246	735	307.264	226.267	1448.28	166.398	372.084	50.4981						2.47735	0.367036	0.342243	2.79068	0.66377	0.765123	1.23437	0.449483					892.287	574.94	161.008	658.374	834.256	272.298					30.3083	5.60966	-0.0186065	-0.390685	18.261	0.217562	8.99787	5.15738
247	738	271.341	196.488	1360.13	192.312	364.064	47.7165						2.0708	0.187121	0.260541	3.38102	0.627912	0.667894	1.19922	0.517496					890.088	558.989	167.219	666.132	848.958	288.658					30.2312	5.42628	0.0192497	-0.383505	18.6004	0.290715	9.03072	5.16479
248	741	282.212	239.62	1401.9	185.34	368.272	50.4176						2.19384	0.447712	0.299261	3.22221	0.646727	0.762309	1.26201	0.480587					879.564	569.795	162.03	672.579	828.783	281.967					29.8619	5.55051	-0.0123789	-0.377538	18.1346	0.260798	8.90299	5.08605
249	744	280.528	248.201	1417.1	244.215	360.101	43.3142						2.17478	0.499554	0.313344	4.56342	0.610189	0.514015	1.44588	0.683015					869.324	578.512	160.629	681.911	847.779	281.224					29.5026	5.65073	-0.0209136	-0.368901	18.5732	0.257475	8.93236	5.0622
250	747	315.617	273.987	1375.79	223.785	343.582	35.4789						2.57188	0.655342	0.275056	4.098	0.536328	0.240138	1.39613	0.647139					861.289	581.677	163.903	678.909	828.491	271.57					29.2207	5.68711	-0.00096239	-0.371679	18.1279	0.214311	8.81289	4.99664
251	750	269.598	303.449	1441.18	215.05	325.503	45.1839						2.05109	0.833343	0.335663	3.89902	0.455487	0.579369	1.35899	0.56799					852.278	559.475	163.456	681.616	834.526	275.329					28.9045	5.43187	-0.00368395	-0.369174	18.2672	0.231117	8.74364	4.96705
252	753	293.442	299.68	1403.64	262.728	341.764	29.5862						2.32093	0.810572	0.300873	4.98515	0.528199	0.0341631	1.49665	0.770853					843.019	571.648	164.959	668.626	855.321	275.986					28.5796	5.57181	0.00547914	-0.381196	18.7473	0.234053	8.79284	4.95182
253	756	317.748	343.776	1349.43	263.807	373.904	29.4291						2.59601	1.07698	0.250625	5.00973	0.671909	0.0286718	1.60566	0.775519					855.785	567.688	159.625	669.976	848.226	283.723					29.0276	5.52629	-0.0270327	-0.379947	18.5835	0.26865	8.83317	5.00185
254	759	295.38	309.964	1376.06	244.147	352.188	37.0038						2.34287	0.872703	0.27531	4.56187	0.57481	0.29344	1.48683	0.690159					845.736	560.236	161.897	691.876	846.176	284.089					28.6749	5.44062	-0.0131841	-0.359679	18.5362	0.270287	8.7582	4.95113
255	762	303.647	344.624	1328.58	222.731	345.218	34.4981						2.43642	1.08211	0.231303	4.074	0.543643	0.205855	1.42889	0.628376					849.095	532.839	163.518	679.138	835.709	266.113					28.7928	5.12566	-0.00330726	-0.371468	18.2945	0.189907	8.67136	4.96322
256	765	311.445	334.284	1390.72	249.706	344.685	36.3295						2.52467	1.01964	0.288897	4.68851	0.541259	0.26987	1.55547	0.714796					853.246	535.882	156.658	658.8	849.032	263.052					28.9384	5.16064	-0.0451181	-0.39029	18.6021	0.17622	8.74034	5.00643
257	768	303.46	360.885	1442.8	241.996	331.122	40.5479						2.43431	1.18035	0.337166	4.51288	0.480612	0.417321	1.56044	0.673155					850.437	523.176	160.035	689.554	846.109	274.561					28.8399	5.01456	-0.0245354	-0.361828	18.5346	0.227683	8.70507	4.98642
258	771	321.73	358.432	1329.95	199.885	322.794	63.1801						2.64107	1.16554	0.232577	3.55355	0.443374	1.20841	1.54075	0.530059					856.291	544.646	157.017	683.962	848.636	284.21					29.0453	5.2614	-0.0429299	-0.367003	18.593	0.270829	8.79343	5.0109
259	774	312.11	340.597	1339.39	262.667	359.576	39.9923						2.5322	1.05778	0.241321	4.98376	0.607843	0.3979	1.6368	0.750115					849.136	525.32	162.869	677.586	852.966	268.805					28.7942	5.03921	-0.00726495	-0.372904	18.6929	0.201946	8.7247	4.99128
260	777	308.982	381.577	1377.82	208.502	316.296	36.4138						2.49679	1.30537	0.276942	3.74984	0.414315	0.272817	1.41935	0.584089					855.293	556.78	158.899	661.916	839.271	285.596					29.0103	5.40089	-0.0314597	-0.387406	18.3768	0.277025	8.77435	4.9892
261	780	335.583	384.914	1345.69	208.939	354.75	45.1494						2.79784	1.32553	0.247164	3.75981	0.586262	0.578163	1.54913	0.579119					855.569	537.692	166.453	692.346	838.725	280.232					29.02	5.18144	0.0145813	-0.359244	18.3642	0.253042	8.74566	4.99174
262	783	336.209	363.073	1324.31	202.097	328.865	40.6513						2.80493	1.19357	0.227351	3.60393	0.470519	0.420935	1.45354	0.578912
263	786	311.914	387.33	1343.18	200.197	343.914	31.1571						2.52998	1.34013	0.244839	3.56066	0.537812	0.0890727	1.38375	0.5699
264	789	320.193	362.04	1335.02	177.796	326.332	30.2452						2.62368	1.18733	0.237275	3.05033	0.459192	0.057198	1.26917	0.52293
265	792	312.767	355.739	1354.62	206.194	354.03	31.9732						2.53963	1.14926	0.255436	3.69726	0.583044	0.117599	1.39037	0.584821
266	795	288.414	359.522	1308.88	231.287	368.704	45.6015						2.26403	1.17212	0.213046	4.2689	0.648661	0.593966	1.52679	0.620636
267	798	316.457	356.644	1332.69	197.272	340.465	40.5671						2.5814	1.15473	0.235111	3.49403	0.522387	0.417992	1.40094	0.545659
268	801	298.202	368.498	1343.01	206.609	327.356	42.4713						2.37481	1.22635	0.244677	3.70673	0.463769	0.484552	1.41681	0.558243
269	804	350.252	378.462	1321.62	175.383	333.25	36.6015						2.96385	1.28655	0.224852	2.99538	0.490129	0.279378	1.37336	0.531166
270	807	312.85	364.413	1293.25	166.398	361.42	39.0958						2.54057	1.20167	0.19856	2.79068	0.616087	0.366564	1.28569	0.459049
271	810	307.997	353.106	1340.68	186.133	345.934	40.4483						2.48565	1.13335	0.242518	3.24025	0.546841	0.41384	1.34374	0.505221
272	813	295.868	382.205	1272.8	150.204	275.522	32.0843						2.34839	1.30916	0.179609	2.42178	0.231998	0.121482	1.10207	0.443747
273	816	339.61	351.931	1278.53	144.269	337.246	35.6973						2.84343	1.12625	0.18492	2.28656	0.507996	0.247772	1.19949	0.458363
274	819	335.859	352.218	1299.81	145.269	339.45	16.1916						2.80097	1.12799	0.20464	2.30934	0.517848	-0.434035	1.08779	0.511518
275	822	329.117	364.617	1267.04	135.978	375.278	28.6973						2.72467	1.2029	0.174274	2.0977	0.678056	0.00309229	1.14678	0.442366
276	825	311.482	389.389	1238.52	131.523	355.88	39.9195						2.52509	1.35257	0.147837	1.99621	0.591317	0.395356	1.16806	0.388671
277	828	318.61	375.584	1269.55	148.588	354.726	34.5632						2.60577	1.26916	0.176595	2.38495	0.586156	0.20813	1.20513	0.439427
278	831	354.485	388.323	1220.05	130.05	335.724	40.1188						3.01176	1.34613	0.130719	1.96265	0.501188	0.402322	1.22579	0.452749
279	834	310.528	373.871	1301.6	121.828	327.291	41.3602						2.51429	1.25881	0.206297	1.77534	0.463482	0.445714	1.11066	0.370261
280	837	332.132	368.459	1241.22	138.133	354.816	46.7625						2.75879	1.22611	0.150339	2.14677	0.586558	0.634548	1.25052	0.412691
281	840	334.948	377.36	1255.3	146.15	353.469	30.5862						2.79066	1.27989	0.163394	2.32943	0.580536	0.0691173	1.20217	0.467238
282	843	337.561	360.851	1249.03	131.337	370.912	53.3602						2.82024	1.18015	0.157576	1.99196	0.658533	0.865165	1.27894	0.39612
283	846	353.632	355.502	1290.84	120.147	355.861	29.8429						3.00211	1.14783	0.196327	1.73705	0.591231	0.0431359	1.11961	0.455202
284	849	323.546	387.858	1250.5	137.097	363.615	35.9962						2.66162	1.34332	0.158946	2.12318	0.625902	0.25822	1.1952	0.420687
285	852	358.236	350.561	1197.64	121.305	368.792	39.0307						3.05422	1.11798	0.109951	1.76342	0.649054	0.364288	1.17649	0.445314
286	855	355.831	394.403	1268.92	118.634	334.544	38.1264						3.027	1.38286	0.176011	1.70259	0.495912	0.332679	1.18617	0.444198
287	858	334.344	380.353	1222.39	124.857	350.364	28.9923						2.78382	1.29797	0.132887	1.84434	0.566652	0.0134038	1.10651	0.440783
288	861	373.534	400.759	1192.42	148.022	369.077	27.1264						3.22734	1.42126	0.105112	2.37205	0.650327	-0.0518173	1.28738	0.534008
289	864	354.524	381.442	1191.88	121.398	373.7	48.7854						3.01221	1.30455	0.104616	1.76554	0.671	0.705257	1.26053	0.421006
290	867	328.656	426.089	1220.32	94.9928	348.231	29.364						2.71946	1.5743	0.130969	1.16401	0.557115	0.0263963	1.02871	0.416636
291	870	317.135	403.64	1189.7	128.946	325.501	30.1877						2.58907	1.43867	0.102594	1.9375	0.455477	0.0551881	1.09642	0.429543
292	873	377.613	402.762	1210.79	93.957	349.715	31.3142						3.27351	1.43336	0.122137	1.14042	0.563751	0.094564	1.10462	0.486192
293	876	353.227	441.868	1291.92	85	352.39	25.0728						2.99753	1.66963	0.197331	0.93637	0.57571	-0.123599	1.04216	0.466143
294	879	349.39	396.637	1194.45	87.5376	369.612	36.2261						2.9541	1.39636	0.106998	0.994179	0.652721	0.266256	1.06177	0.424624
295	882	348.957	440.191	1242.28	91.0394	357.6	37.0651						2.9492	1.6595	0.151322	1.07395	0.599006	0.295582	1.12143	0.429286
296	885	334.887	404.861	1198.25	109.559	317.437	33.5364						2.78996	1.44605	0.110515	1.49585	0.419418	0.172239	1.07234	0.425474
297	888	344.991	415.703	1183.87	89.7061	357.195	23.4598						2.90432	1.51155	0.0971859	1.04358	0.597196	-0.179981	0.995641	0.456785
298	891	334.356	453.413	1192.93	99.2151	351.338	36.4789						2.78396	1.73938	0.105583	1.2602	0.571008	0.275092	1.12254	0.416985
299	894	350.899	415.099	1168.5	118.262	347.758	27.0038						2.97118	1.5079	0.0829457	1.6941	0.554999	-0.0561027	1.12584	0.472039
300	897	337.613	441.571	1204.57	81.4767	321.827	34.5172						2.82083	1.66783	0.116374	0.856106	0.439046	0.206522	1.01778	0.42838

## Sheet: B
		hugin/Gc6m 50mM glucose	hugin/Gc6m 50mM glucose-1.tif	hugin/Gc6m 50mM glucose-2.tif	hugin/Gc6m 50mM glucose-3	hugin/Gc6m 50mM glucose-4	hugin/Gc6m 50mM glucose-5						hugin/Gc6m 50mM glucose	hugin/Gc6m 50mM glucose-1.tif	hugin/Gc6m 50mM glucose-2.tif	hugin/Gc6m 50mM glucose-3	hugin/Gc6m 50mM glucose-4	hugin/Gc6m 50mM glucose-5						hugin/Gc6m glut1i 50mM glucose	hugin/Gc6m glut1i 50mM glucose-1.tif	hugin/Gc6m glut1i 50mM glucose-2.tif	hugin/Gc6m glut1i 50mM glucose-3	hugin/Gc6m glut1i 50mM glucose-4	hugin/Gc6m glut1i 50mM glucose-5				hugin/Gc6m glut1i 50mM glucose	hugin/Gc6m glut1i 50mM glucose-1.tif	hugin/Gc6m glut1i 50mM glucose-2.tif	hugin/Gc6m glut1i 50mM glucose-3	hugin/Gc6m glut1i 50mM glucose-4	hugin/Gc6m glut1i 50mM glucose-5						Peak
	time（sec）	raw data	raw data	raw data	raw data	raw data	raw data						F/F0	F/F0	F/F0	F/F0	F/F0	F/F0	mean	SEM				raw data	raw data	raw data	raw data	raw data	raw data				F/F0	F/F0	F/F0	F/F0	F/F0	F/F0	Mean	SEM				hugin gc6m	hugin-glut1i gc6m
1	0	93.5092	134.38	1136.65	53.9821	218.259	29.0766						0.0582588	-0.188121	0.0534297	0.229757	-0.024055	0.0163504	0.0242699	0.0552987				816.236	700.395	679.545	677.386	529.244	823.16				0.104946	-0.0272393	0.0863403	0.173876	0.0594455	0.0799405	0.0795515	0.0267063				4.38912	0.590974
2	3	76.3006	160.686	1088.44	38.7993	220.343	35.272						-0.136494	-0.0291827	0.00875073	-0.11612	-0.0147386	0.232906	-0.0091464	0.0538526				829.588	697.323	668.914	644.943	527.265	781.46				0.123021	-0.0315054	0.0693444	0.117654	0.0554845	0.0252328	0.0598719	0.0237944				4.24516	0.783787
3	6	88.4693	158	1038.3	28.0968	216.899	24.1533						0.00122139	-0.0454137	-0.0377214	-0.359932	-0.0301349	-0.15574	-0.10462	0.0555363				808.872	682.883	698.502	677.783	453.341	800.395				0.094977	-0.051561	0.116645	0.174563	-0.0924976	0.0500744	0.0487003	0.0418691				0.28525	0.726258
4	9	77.181	158.908	1122.46	47.3548	220.24	24.4943						-0.12653	-0.0399303	0.0402774	0.0787814	-0.0151983	-0.14382	-0.0344034	0.0361694				803.077	716.753	641.846	668.489	468.801	792.96				0.0871323	-0.00451967	0.0260724	0.158458	-0.0615502	0.0403202	0.0409855	0.0309497				4.13483	0.72767
5	12	78.2147	160.644	1065.52	34.7168	218.694	29.5862						-0.114832	-0.0294419	-0.0124969	-0.209123	-0.0221112	0.0341631	-0.0589735	0.0359306				812.824	723.753	643.086	595.865	539.756	791.557				0.100327	0.00520245	0.0280553	0.0326034	0.0804881	0.0384794	0.0475259	0.014548				1.26705	0.971265
6	15	83.8589	162.099	1064.55	35.8566	231.111	41.1379						-0.0509553	-0.0206489	-0.0133953	-0.183157	0.0334136	0.437944	0.0338669	0.0861739				765.73	720.609	647.255	635.37	501.147	801.166				0.0365757	0.00083472	0.0347195	0.101064	0.00320026	0.0510855	0.0379133	0.0150037				2.1262	0.93203
7	18	84.2945	173.812	1087.36	43.1183	227.079	33.0805						-0.0460255	0.0501168	0.00774341	-0.0177296	0.0153841	0.156304	0.0276322	0.0289198				761.42	740.787	629.466	558.085	498.052	763.498				0.0307408	0.0288605	0.00628265	-0.0328662	-0.00299494	0.00166714	0.00528167	0.00956027			Mean	2.74127	0.788664
8	21	82.3988	160.241	1064.83	58.2581	241.364	31.4291						-0.0674794	-0.0318749	-0.0131376	0.327168	0.0792585	0.0985803	0.0654191	0.0586239				759.377	757.476	615.829	582.769	521.801	819.455				0.0279763	0.052039	-0.0155188	0.00990869	0.0445458	0.075079	0.0323383	0.0131356			SEM	0.71886	0.0579128
9	24	78.9601	165.436	1108.14	32.7634	220.471	25.5824						-0.106396	-0.000490182	0.0270044	-0.253623	-0.014164	-0.105787	-0.0755758	0.0422276				750.272	707.432	590.103	579.731	516.429	738.713				0.0156502	-0.0174652	-0.0566453	0.00464503	0.0337919	-0.0308489	-0.0084787	0.013469
10	27	77.1963	146.363	1134.16	47.0143	213.116	32.6705						-0.126357	-0.115721	0.0511168	0.0710245	-0.0470541	0.141972	-0.00416969	0.0444525				717.391	714.445	621.827	592.504	502.872	741.947				-0.0288614	-0.00772616	-0.00593087	0.0267786	0.00665358	-0.026607	-0.00594886	0.00853387
11	30	98.3589	171.257	1127.33	46.0143	231.831	28.249						0.113144	0.0346833	0.0447945	0.0482437	0.0366308	-0.0125777	0.044153	0.0164737				741.805	730.199	625.83	553.733	507.436	724.371				0.00418782	0.0141544	0.000469397	-0.0404085	0.0157898	-0.0496647	-0.00924528	0.0116247
12	33	91.3037	143.271	1075.8	43.7061	206.632	26.751						0.0332988	-0.134404	-0.00297103	-0.00433899	-0.0760469	-0.0649392	-0.0415669	0.0250561				700.672	730.16	614.159	522.696	500.443	794.075				-0.0514932	0.0141011	-0.0181882	-0.0941948	0.00179139	0.0417826	-0.0177002	0.0199358
13	36	75.5552	157.346	1073.47	34.4337	224.604	15.8544						-0.14493	-0.049362	-0.0051309	-0.215572	0.00431578	-0.445822	-0.14275	0.0698686				696.249	716.785	593.352	568.075	488.337	753.549				-0.0574812	-0.00447606	-0.0514515	-0.0155553	-0.0224437	-0.0113849	-0.0271321	0.00899959
14	39	102.046	161.696	1030.33	44.3871	237.428	28.6092						0.154871	-0.0230813	-0.0451075	0.0111748	0.0616601	1.28166e-05	0.0265883	0.0295735				732.295	715.145	618.244	552.149	500.893	764.366				-0.00868541	-0.00675381	-0.011658	-0.0431528	0.0026928	0.00280538	-0.010792	0.00691724
15	42	81.1994	168.492	1065.98	57.3441	221.195	29.3985						-0.0810532	0.0179738	-0.0120696	0.306346	-0.0109276	0.0276022	0.0413119	0.0552351				695.985	727.72	592.376	534.448	495.943	753.702				-0.057839	0.010712	-0.0530119	-0.0738279	-0.00721675	-0.0111852	-0.0320615	0.0138209				P value	0.022
16	45	82.4969	190.558	1064.87	46.2903	246.814	30.2069						-0.0663692	0.15129	-0.0130972	0.0545312	0.103627	0.0558592	0.0476402	0.0319792				674.736	709.802	594.359	538.399	499.749	734.069				-0.086604	-0.014174	-0.0498415	-0.0669824	0.000401533	-0.0369418	-0.042357	0.0132566				95% confidence interval	-3.560 to -0.3457
17	48	80.2301	191.68	1056.91	25.5484	228.293	20.7471						-0.092023	0.15807	-0.0204752	-0.417986	0.0208134	-0.274801	-0.1044	0.085467				675.527	734.052	596.602	518.642	483.261	729.411				-0.0855331	0.0195065	-0.0462559	-0.101219	-0.0326045	-0.043053	-0.0481932	0.0173805				F, DFn, Dfd	154.1, 5, 5
18	51	111.647	154.185	1068.27	31.7348	206.493	30.8544						0.263529	-0.068464	-0.00994211	-0.277055	-0.0766693	0.0784921	-0.0150182	0.0734119				679.54	718.226	597.766	521.783	463.382	703.688				-0.0801001	-0.00247455	-0.0443953	-0.0957766	-0.0723988	-0.0768007	-0.061991	0.0137221
19	54	109.104	176.436	1048.27	65.5484	232.602	35.4483						0.234751	0.0659684	-0.0284778	0.493247	0.0400779	0.239068	0.174106	0.0775556				679.64	721.004	619.81	498.986	509.782	689.053				-0.0799652	0.00138444	-0.00915482	-0.135283	0.0204861	-0.0960002	-0.0497554	0.0255367
20	57	87.3712	185.72	1088.65	51.2975	209.364	25.2759						-0.011206	0.122059	0.00894007	0.168599	-0.0638294	-0.1165	0.0180104	0.0444334				672.987	735.2	621.86	519.182	483.031	743.949				-0.0889717	0.0210999	-0.00587732	-0.100285	-0.0330647	-0.0239806	-0.0385132	0.0193404
21	60	115.893	194.644	1048.75	55.5627	223.582	22.908						0.311575	0.175975	-0.0280345	0.265764	-0.000251852	-0.199268	0.0876267	0.0802289				627.126	731.107	607.769	498.057	529.479	682.587				-0.151053	0.0154161	-0.0284033	-0.136893	0.0599151	-0.104484	-0.0575835	0.0352195
22	63	99.1963	195.261	1075.97	44.0824	232.503	25.4751						0.122621	0.179704	-0.00280588	0.00423344	0.0396375	-0.109537	0.0389753	0.0415572				685.904	728	559.287	495.477	503.63	694.047				-0.0714851	0.0111006	-0.105908	-0.141364	0.00817155	-0.0894482	-0.0648221	0.0253573
23	66	108.641	183.069	1074.07	38.7634	218.287	36.4368						0.229509	0.106047	-0.00456677	-0.116938	-0.0239307	0.273621	0.0772902	0.062507				606.649	716.241	596.999	478.295	512.896	734.745				-0.178773	-0.00523174	-0.0456211	-0.171138	0.0267193	-0.0360551	-0.06835	0.03528
24	69	97.5798	209.185	1067.1	39.9247	252.345	28.6092						0.104326	0.263829	-0.011034	-0.0904824	0.128359	1.28166e-05	0.0658351	0.0514033				673.247	752.311	608.367	473.729	491.995	781.342				-0.0886191	0.0448658	-0.0274473	-0.179051	-0.0151195	0.0250774	-0.0400489	0.0336218
25	72	95.1779	181.931	988.796	39.0609	210.567	30.4713						0.0771437	0.099168	-0.0836011	-0.11016	-0.0584479	0.0651011	-0.00179945	0.0376585				657.596	750.923	598.762	515.391	505.431	757.298				-0.109806	0.0429382	-0.0428024	-0.106853	0.0117768	-0.00646639	-0.0352021	0.0257527
26	75	84.8896	177.066	919.591	48.1936	212.587	30.6245						-0.0392907	0.069777	-0.147739	0.09789	-0.0494191	0.0704561	0.000279126	0.0388276				598.793	691.415	566.285	525.774	501.747	815.387				-0.189408	-0.0397114	-0.0947215	-0.0888602	0.00440055	0.069743	-0.0564263	0.0365608
27	78	93.4509	203.432	981.448	49.8208	201.595	38.6284						0.057599	0.229074	-0.090411	0.134959	-0.0985671	0.350226	0.0971467	0.0725557				646.337	715.634	561.862	499.463	522.209	774.617				-0.125047	-0.00607437	-0.101791	-0.134457	0.0453618	0.0162541	-0.0509589	0.0320701
28	81	97.7055	196.416	953.517	45.6344	204.493	29.8123						0.105749	0.186682	-0.116296	0.0395893	-0.0856123	0.0420663	0.0286964	0.0466489				655.536	730.997	569.237	462.566	525.822	778.923				-0.112594	0.0152636	-0.0900022	-0.198397	0.0525957	0.0219038	-0.0518717	0.0397803
29	84	96.6933	159.053	882	40.0287	188.893	19.4981						0.0942937	-0.0390531	-0.182578	-0.0881132	-0.155366	-0.318459	-0.114879	0.0571216				522.387	729.316	563.876	435.758	573.585	711.98				-0.29284	0.0129278	-0.0985728	-0.244853	0.148208	-0.0659214	-0.0901753	0.0666118
30	87	96.9295	197.073	917.183	60.1864	211.777	18.0115						0.0969668	0.190651	-0.149971	0.371096	-0.0530383	-0.370422	0.0142137	0.107202				553.063	722.856	565.681	437.507	520.472	716.433				-0.251313	0.00395635	-0.0956873	-0.241822	0.0418846	-0.0600798	-0.10051	0.0501857
31	90	95.908	193.515	883.583	43.4194	191.991	20.9579						0.0854064	0.169156	-0.181111	-0.0108703	-0.141511	-0.267433	-0.0577271	0.0684052				537.352	725.75	552.394	470.046	538.277	697.947				-0.272581	0.00797534	-0.116928	-0.185434	0.077528	-0.0843325	-0.0956286	0.0518573
32	93	93.4295	300.561	802.622	35.0645	210.178	16.8314						0.0573568	0.815896	-0.256144	-0.201202	-0.0601909	-0.411671	-0.00932592	0.17773				565.649	729.916	548.052	325.584	496.121	668.749				-0.234275	0.0137621	-0.12387	-0.43578	-0.00686103	-0.122638	-0.15161	0.0676991
33	96	94.6043	300.502	773.383	42.0753	219.52	14.613						0.0706522	0.815536	-0.283242	-0.04149	-0.0184155	-0.489214	0.00897113	0.181771				548.27	707.816	534.988	320.674	518.663	680.771				-0.257802	-0.0169325	-0.144753	-0.444287	0.0382651	-0.106866	-0.155396	0.0714354
34	99	106.009	299.023	750.904	59.4373	224.216	23.7778						0.199723	0.806603	-0.304075	0.354031	0.00258263	-0.168865	0.148333	0.163789				540.153	716.327	558.963	353.109	549.706	672.006				-0.268789	-0.00511175	-0.106426	-0.388081	0.100407	-0.118365	-0.131061	0.0719344
35	102	108.663	310.96	739.244	57.4552	228.148	30.3218						0.229752	0.878725	-0.314882	0.308877	0.0201623	0.0598754	0.197085	0.16232				543.456	743.854	566.678	302.326	544.554	694.761				-0.264319	0.0331191	-0.0940925	-0.476085	0.090094	-0.0885121	-0.133299	0.0848156
36	105	121.89	324.274	741.161	45.5591	210.428	21.4253						0.379444	0.959161	-0.313105	0.0378739	-0.0590704	-0.251095	0.125535	0.194544				563.523	735.826	559.97	325.745	713.062	691.2				-0.237154	0.0219694	-0.104816	-0.4355	0.427413	-0.0931844	-0.0702119	0.118203
37	108	89.8067	365.429	715.296	51.7204	202.917	26.8276						0.016357	1.20781	-0.337076	0.178233	-0.0926594	-0.0622617	0.151733	0.222019				539.192	779.181	528.042	360.146	829.694	700.962				-0.270091	0.082185	-0.155858	-0.375885	0.660889	-0.080376	-0.0231893	0.151139
38	111	118.451	386.346	658.657	48.3369	212.97	23.4943						0.340528	1.33418	-0.389568	0.101154	-0.0477052	-0.178775	0.193303	0.249536				546.368	767.685	572.517	383.482	825.033	659.154				-0.260377	0.0662183	-0.0847589	-0.335445	0.651559	-0.135226	-0.0163383	0.14527
39	114	126.347	390.858	665.9	54.3082	210.64	18.1724						0.429885	1.36144	-0.382855	0.237186	-0.0581224	-0.364798	0.203789	0.26636				517.4	773.394	574.543	353.479	789.047	620.105				-0.29959	0.0741472	-0.0815194	-0.387439	0.579522	-0.186457	-0.0502228	0.142301
40	117	137.344	392.224	695.413	39.6272	205.253	22.1686						0.55434	1.3697	-0.355503	-0.0972597	-0.0822131	-0.225113	0.193991	0.267759				453.343	774.926	574.693	309.678	828.851	628.806				-0.386305	0.0762748	-0.0812804	-0.463344	0.659201	-0.175041	-0.0617492	0.165192
41	120	150.261	403.924	493.935	38.1936	205.403	27.3065						0.700525	1.44038	-0.54223	-0.129918	-0.0815428	-0.0455221	0.223616	0.293543				485.169	773.759	597.873	299.55	854.415	677.654				-0.343223	0.0746534	-0.0442233	-0.480895	0.710375	-0.110955	-0.032378	0.170024
42	123	144.009	448.142	640.717	54.5233	194.379	38.1149						0.629775	1.70753	-0.406194	0.242086	-0.130835	0.332277	0.395774	0.301308				474.565	776.48	584.444	313.461	917.18	686.235				-0.357577	0.0784338	-0.0656919	-0.456788	0.836019	-0.0996974	-0.0108836	0.18754
43	126	164.896	456.168	676.383	39.5412	215.137	36.5785						0.866151	1.75603	-0.37314	-0.0992188	-0.0380154	0.278574	0.398396	0.321955				471.72	784.466	550.313	284.037	922.957	681.506				-0.361428	0.0895242	-0.120254	-0.507778	0.847584	-0.105902	-0.0263755	0.194626
44	129	139.282	499.198	675	42.3692	226.617	26.59						0.576279	2.016	-0.374422	-0.0347947	0.013316	-0.0705668	0.354302	0.355421				455.805	775.67	597.63	294.813	906.519	698.366				-0.382973	0.0773077	-0.0446114	-0.489104	0.814678	-0.083783	-0.018081	0.188203
45	132	204.715	508.129	719.165	56.2401	217.124	37.1916						1.31679	2.06995	-0.33349	0.281196	-0.0291297	0.300004	0.600887	0.371187				513.835	788.079	590.389	350.31	896.22	690.484				-0.304416	0.0945432	-0.0561882	-0.392931	0.794062	-0.0941229	0.0068244	0.173039
46	135	197.491	502.974	663.891	48.7276	225.475	42.1149						1.23504	2.03881	-0.384717	0.110055	0.00821269	0.472094	0.579915	0.367301				509.159	762.911	613.201	334.384	921.82	674.972				-0.310747	0.0595877	-0.01972	-0.420529	0.845307	-0.114474	0.00657095	0.183006
47	138	189.739	524.927	630.835	42.2294	229.398	37.1954						1.14731	2.17145	-0.415353	-0.0379794	0.0257539	0.300137	0.531886	0.391527				475.887	804.405	586.817	341.792	851.967	659.476				-0.355787	0.117218	-0.061898	-0.407692	0.705475	-0.134804	-0.0229147	0.165639
48	141	238.009	471.71	627.404	42.8996	247.6	32.8429						1.69359	1.84992	-0.418532	-0.0227117	0.107141	0.147999	0.559568	0.392463				496.36	774.807	617.633	359.575	837.697	708.129				-0.328073	0.07611	-0.012635	-0.376875	0.676909	-0.0709746	-0.00592312	0.154774
49	144	240.696	504.713	671.009	52.724	251.409	26.1648						1.724	2.04932	-0.378121	0.201096	0.124175	-0.0854293	0.605839	0.415361				484.245	782.671	611.205	342.82	820.938	680.787				-0.344473	0.0870322	-0.0229115	-0.40591	0.643362	-0.106846	-0.0249576	0.154177
50	147	251.23	461.429	654.73	44.767	251.565	31.5479						1.84321	1.78781	-0.393207	0.0198292	0.124874	0.102733	0.580875	0.397926				523.013	794.959	601.953	334.441	781.301	686.318				-0.291992	0.104098	-0.0377006	-0.42043	0.564015	-0.0995885	-0.0302663	0.141045
51	150	258.362	460.98	625.717	56.5161	254.248	29.9387						1.92392	1.7851	-0.420096	0.287483	0.136871	0.0464845	0.626627	0.400504				495.006	805.279	606.198	400.849	743.102	678.694				-0.329906	0.118431	-0.0309142	-0.305349	0.487548	-0.109591	-0.028297	0.124092
52	153	253.485	493.36	618.417	67.5448	263.184	36.0843						1.86873	1.98072	-0.426861	0.538726	0.176827	0.261299	0.73324	0.398394				502.477	795.647	634.864	359.237	721.543	691.314				-0.319792	0.105054	0.0149106	-0.377461	0.444391	-0.093034	-0.0376554	0.122968
53	156	278.414	480.076	596.665	49.5448	250.608	57.2107						2.15086	1.90047	-0.447021	0.128671	0.120593	0.999756	0.808888	0.42983				498.77	816.788	633.098	342.482	714.621	701.253				-0.32481	0.134416	0.0120882	-0.406496	0.430534	-0.0799949	-0.0390437	0.125375
54	159	300.163	500.439	630.148	53.3799	213.46	44.1188						2.39699	2.02349	-0.41599	0.216038	-0.0455123	0.542139	0.786193	0.470716				526.515	837.064	613.932	326.283	738.258	713.767				-0.287251	0.162577	-0.0185516	-0.434568	0.477852	-0.0635774	-0.0272532	0.132422
55	162	274.807	493.541	638.587	49.2222	265.91	46.1341						2.11003	1.98182	-0.408169	0.121322	0.189016	0.612582	0.767768	0.425651				529.579	832.05	621.99	350.808	713.14	720.15				-0.283104	0.155613	-0.00566885	-0.392068	0.42757	-0.0552028	-0.025477	0.121117
56	165	299.948	522.498	574.874	56.1577	248.445	40.3487						2.39456	2.15677	-0.467217	0.279319	0.110923	0.410358	0.814119	0.479091				516.18	838.092	647.946	363.272	675.18	751.99				-0.301242	0.164004	0.0358248	-0.370468	0.351581	-0.0134306	-0.0222884	0.112099
57	168	281.046	455.106	697.27	52.1936	247.702	44.931						2.18064	1.7496	-0.353783	0.189013	0.107601	0.570529	0.740601	0.4092				496.466	843.873	659.78	366.109	671.102	705.589				-0.32793	0.172033	0.0547425	-0.365552	0.343418	-0.0743064	-0.0329326	0.114121
58	171	310.561	516.149	608.052	51.6487	221.745	43.3448						2.51467	2.11841	-0.436468	0.1766	-0.00846689	0.515085	0.813305	0.494284				525.634	860.348	660.475	358.788	638.789	732.51				-0.288444	0.194915	0.0558535	-0.378238	0.278734	-0.0389875	-0.0293613	0.10668
59	174	330.528	498.294	659.074	65.8172	271.229	40.2682						2.74063	2.01053	-0.389182	0.49937	0.2128	0.407544	0.913617	0.488445				503.312	834.13	660.968	383.318	675.953	688.354				-0.318661	0.158502	0.0566413	-0.335728	0.353128	-0.0969179	-0.0305061	0.11122
60	177	330.503	519.353	631.991	72.6595	237.604	49.5632						2.74036	2.13777	-0.414281	0.655243	0.0624453	0.732444	0.985663	0.496379				485.264	837.89	654.278	364.224	685.102	711.547				-0.343093	0.163724	0.0459462	-0.368818	0.371443	-0.0664892	-0.0328811	0.118119
61	180	329.408	498.462	603.157	62.7204	235.782	34.3372						2.72796	2.01155	-0.441005	0.428822	0.0542968	0.200231	0.83031	0.50902				531.588	848.019	686.666	279.646	652.787	720.593				-0.280384	0.177792	0.0977238	-0.515388	0.306754	-0.054622	-0.0446873	0.125233
62	183	374.61	529.677	614.535	49.4803	256.27	47.5977						3.23953	2.20014	-0.43046	0.127202	0.14591	0.663741	0.99101	0.580398				491.655	863.503	668.581	343.441	720.965	685.397				-0.334442	0.199297	0.0688128	-0.404834	0.443233	-0.100797	-0.0214548	0.132168
63	186	371.377	508.485	599.244	57.1792	229.225	38.9502						3.20294	2.07211	-0.444631	0.302589	0.0249781	0.361475	0.919909	0.574328				507.473	871.057	690.08	336.806	685.142	683.073				-0.313029	0.209788	0.103181	-0.416332	0.371524	-0.103846	-0.0247856	0.125314
64	189	381.092	518.323	639.139	56.8495	250.261	52.5594						3.31288	2.13155	-0.407657	0.295079	0.119042	0.837174	1.04801	0.574369				544.471	857.395	652.965	349.411	626.372	719.29				-0.262944	0.190814	0.0438485	-0.394488	0.253877	-0.0563307	-0.0375373	0.103645
65	192	376.531	543.383	614.913	62.7348	211.739	49.8774						3.26126	2.28295	-0.430109	0.42915	-0.0532105	0.743427	1.03891	0.585842				524.366	896.259	683.123	404.648	639.41	739.277				-0.290161	0.244791	0.0920597	-0.298766	0.279977	-0.0301099	-0.000368247	0.103464
66	195	375.644	469.611	586.804	77.4444	259.066	54.5594						3.25123	1.83724	-0.45616	0.764247	0.158415	0.907082	1.07701	0.53623				529.55	878.808	682.41	399.206	651.012	713.998				-0.283143	0.220554	0.0909201	-0.308195	0.303201	-0.0632741	-0.00665627	0.10452
67	198	406.862	523.489	613.774	54.172	249	43.1762						3.60452	2.16275	-0.431165	0.234083	0.113403	0.509191	1.03213	0.626928				520.728	855.773	692.047	433.925	640.839	726.423				-0.295086	0.188562	0.106325	-0.248029	0.282837	-0.0469733	-0.00206081	0.0961999
68	201	419.322	488.789	619.487	81.129	248.957	57.4866						3.74554	1.95311	-0.42587	0.848186	0.113212	1.0094	1.20726	0.60639				501.19	869.527	710.818	418.993	670.969	731.504				-0.321535	0.207663	0.136334	-0.273906	0.343152	-0.0403072	0.00856675	0.109401
69	204	389.988	638.317	610.939	73.9857	247.595	42.318						3.41355	2.85651	-0.433792	0.685455	0.107122	0.479193	1.18467	0.640063				534.966	875.836	698.807	385.24	614.616	726.423				-0.275812	0.216426	0.117133	-0.332398	0.230344	-0.0469733	-0.0152134	0.100166
70	207	384.39	695.815	653.744	70.2975	239.786	56.2874						3.3502	3.2039	-0.394122	0.601435	0.0722021	0.967483	1.30018	0.653305				554.657	883.677	713.913	420.644	658.493	741.986				-0.249155	0.227316	0.141281	-0.271045	0.318177	-0.0265553	0.0233363	0.10097
71	210	447.411	562.591	640.987	73.0143	244.15	46.659						4.06342	2.399	-0.405944	0.663326	0.0917157	0.63093	1.24041	0.684256				541.768	874.438	752.761	445.988	668.249	761.99				-0.266603	0.214485	0.203384	-0.227126	0.337706	-0.000311141	0.0435892	0.102091
72	213	421.663	633.904	680.691	60.4982	260.056	57.4713						3.77202	2.82985	-0.369147	0.378199	0.162838	1.00887	1.29711	0.669949				572.519	890.64	747.111	453.137	631.351	694.858				-0.224975	0.236987	0.194353	-0.214736	0.263843	-0.0883851	0.0278477	0.0937077
73	216	437.295	644.112	706.487	53	268.612	33.3755						3.94893	2.89152	-0.34524	0.207384	0.2011	0.166615	1.17839	0.726953				571.144	858.058	759.109	464.286	707.5	751.2				-0.226837	0.191735	0.213532	-0.195415	0.41628	-0.0144677	0.0641379	0.103411
74	219	476.19	604.416	655.991	81.4337	252.319	35.4828						4.38912	2.65169	-0.392039	0.855127	0.128244	0.240274	1.31207	0.751128				556.558	897.508	748.517	459.292	657.299	733.751				-0.246583	0.246526	0.1966	-0.204071	0.315786	-0.0373593	0.0451499	0.098448
75	222	402.451	678.172	645.457	63.638	268.563	37.6935						3.5546	3.0973	-0.401802	0.449726	0.20088	0.317548	1.20304	0.684336				574.421	899.555	787.879	473.301	655.64	766.909				-0.2224	0.249369	0.259526	-0.179794	0.312466	0.00614232	0.0708848	0.0964107
76	225	439.276	695.937	667.722	75.4588	252.231	40.9004						3.97136	3.20463	-0.381167	0.719014	0.127852	0.429642	1.34522	0.731365				621.841	910.042	732.64	488.47	677.472	699.103				-0.158208	0.263934	0.171219	-0.153507	0.356169	-0.0828158	0.0661318	0.0922036
77	228	370.012	643.099	699.356	74.5878	229.97	41.1647						3.18749	2.8854	-0.351848	0.699172	0.0283103	0.438881	1.1479	0.616053				566.72	887.85	804.123	505.132	667.498	737.698				-0.232825	0.233112	0.285494	-0.124632	0.336203	-0.0321816	0.0775282	0.097227
78	231	413.377	672.228	749.948	84.2222	246.73	37.7816						3.67826	3.06139	-0.304961	0.918651	0.103253	0.320627	1.2962	0.679981				559.056	877.407	790.067	508.728	634.77	718.269				-0.243201	0.218608	0.263023	-0.1184	0.270688	-0.0576711	0.0555078	0.0909666
79	234	446.028	714.234	720.217	79.681	245.893	46.6284						4.04777	3.31518	-0.332515	0.815199	0.0995095	0.62986	1.42917	0.737145				594.205	874.024	786.163	487.105	645.564	735.49				-0.195619	0.21391	0.256782	-0.155872	0.292296	-0.0350777	0.0627365	0.0889399
80	237	445.561	657.587	760.887	79.8495	256.471	41.7318						4.04249	2.97294	-0.294823	0.819037	0.14681	0.458703	1.35753	0.709754				580.874	860.185	791.37	528.555	638.635	736.18				-0.213666	0.194689	0.265105	-0.0840406	0.278425	-0.0341727	0.0677233	0.0840774
81	240	416.528	698.637	674.3	73.3262	270.75	31.3295						3.71391	3.22094	-0.37507	0.670431	0.210656	0.0950988	1.256	0.715217				569.789	880.686	679.189	517.573	644.803	711.368				-0.228671	0.223163	0.0857704	-0.103072	0.290773	-0.0667251	0.0335396	0.0821227
82	243	430.595	703.696	702.426	90.1004	276.341	38.3908						3.87311	3.25151	-0.349004	1.05256	0.235656	0.341921	1.40096	0.71179				613.536	867.225	738.147	486.728	665.891	750.656				-0.16945	0.204466	0.180023	-0.156525	0.332986	-0.0151807	0.0627199	0.0846435
83	246	454.632	700.894	725.083	116.133	269.839	34.5785						4.14514	3.23458	-0.328006	1.6456	0.206586	0.208665	1.51876	0.746251				611.335	843.076	670.225	506.066	701.377	788.48				-0.17243	0.170927	0.0714402	-0.123014	0.404022	0.0344424	0.0642314	0.0854108
84	249	390.313	726.224	781.657	101.179	242.31	42.2452						3.41723	3.38762	-0.275574	1.30495	0.0834908	0.476649	1.39906	0.668885				599.975	847.987	685.951	522.423	665.865	765.619				-0.187808	0.177747	0.0965802	-0.0946665	0.332934	0.00444925	0.0548727	0.0770183
85	252	421.236	705.224	706.761	86.6272	290.531	42.4866						3.7672	3.26074	-0.344986	0.973439	0.299109	0.485087	1.40677	0.691416				578.893	849.595	700.291	545.662	665.571	715.543				-0.216348	0.17998	0.119504	-0.0543955	0.332346	-0.0612465	0.0499735	0.0807589
86	255	428.11	745.845	707.77	101.81	270.822	55.0766						3.84499	3.50616	-0.344051	1.31932	0.210981	0.925161	1.57709	0.705058				592.379	853.771	671.518	503.518	661.725	753.822				-0.198091	0.18578	0.0735072	-0.127429	0.324647	-0.0110271	0.0412313	0.0797314
87	258	358.383	612.132	773.7	100.194	273.649	42.6284						3.05588	2.69831	-0.282948	1.28249	0.22362	0.490043	1.24457	0.557991				584.439	876.98	707.431	520.39	670.389	625.381				-0.20884	0.218015	0.130918	-0.098191	0.34199	-0.179534	0.0340597	0.0931226
88	261	388.641	724.043	759.139	102.531	267.668	32.8889						3.39831	3.37444	-0.296443	1.33573	0.196877	0.149606	1.35975	0.677618				581.08	883.953	592.849	519.548	670.275	635.105				-0.213386	0.2277	-0.0522546	-0.0996496	0.341762	-0.166778	0.00623229	0.0920913
89	264	427.684	747.31	779.017	118.423	284.173	46.2299						3.84017	3.51501	-0.27802	1.69777	0.270681	0.615931	1.61026	0.706093				596.573	824.415	736.145	551.719	684.713	564.081				-0.192414	0.145009	0.176821	-0.043899	0.370665	-0.259957	0.0327043	0.0982847
90	267	389.509	771.076	846.783	107.247	278.632	53.5939						3.40814	3.6586	-0.215216	1.44318	0.245901	0.873334	1.56899	0.662889				599.423	774.004	717.459	512.808	652.303	589.168				-0.188555	0.0749948	0.146951	-0.11133	0.305786	-0.227044	0.000133778	0.0856778
91	270	421.595	779.871	807.435	122.383	294.313	47.977						3.77126	3.71174	-0.251683	1.788	0.316018	0.677	1.66872	0.709697				632.987	690.562	738.039	527.482	647.55	616.826				-0.14312	-0.0408957	0.17985	-0.0859	0.296271	-0.190758	0.00257451	0.0787414
92	273	420.549	744.172	899.809	142.717	308.704	43.0766						3.75942	3.49605	-0.166073	2.25121	0.380371	0.50571	1.70445	0.693318				635.058	561.54	723.529	497.947	627.953	589.138				-0.140317	-0.220092	0.156653	-0.137084	0.257041	-0.227083	-0.0518135	0.0842596
93	276	391.169	727.452	867.339	133.502	304.773	49.4291						3.42692	3.39504	-0.196165	2.04128	0.362792	0.727757	1.62627	0.639481				629.778	785.069	762.514	525.269	616.517	627.925				-0.147464	0.090362	0.218977	-0.0897359	0.234148	-0.176197	0.0216816	0.0750477
94	279	404.181	721.766	866.43	150.62	275.576	46.1034						3.57418	3.36068	-0.197007	2.43125	0.232237	0.611509	1.66881	0.676685				607.126	790.846	754.547	493.687	603.765	639.889				-0.178127	0.0983854	0.206239	-0.144466	0.208623	-0.160501	0.00502564	0.076146
95	282	342.613	734.564	865.352	167.735	290.253	56.2797						2.87741	3.43801	-0.198006	2.82114	0.297864	0.967214	1.7006	0.626347				654.889	836.723	773.037	513.811	680.761	660.875				-0.113471	0.162103	0.235799	-0.109591	0.362753	-0.132968	0.0674375	0.0873207
96	285	390.899	767.149	1020.69	143.688	300.06	39.8621						3.42387	3.63487	-0.0540448	2.27334	0.341718	0.393349	1.66885	0.674963				638.307	710.309	708.907	562.852	683.152	543.808				-0.135919	-0.0134704	0.133278	-0.0246054	0.367539	-0.286554	0.00671151	0.0920057
97	288	382.276	739.69	981.274	167.179	288.3	48.4904						3.32628	3.46897	-0.0905722	2.80848	0.289132	0.694945	1.74954	0.663197				657.389	727.812	699.836	550.164	572.14	562.326				-0.110087	0.0108391	0.118777	-0.0465941	0.145314	-0.262259	-0.0240015	0.0619019
98	291	409.135	747.927	926.226	179.265	285.338	64.8506						3.63025	3.51874	-0.14159	3.08381	0.27589	1.2668	1.93898	0.68831				639.918	822.564	680.258	562.044	577.27	569.043				-0.133738	0.142438	0.08748	-0.0260053	0.155584	-0.253446	-0.00461445	0.0670366
99	294	420.101	751.726	1018.59	183.778	289.717	54.9042						3.75435	3.54169	-0.0559911	3.18661	0.29547	0.919135	1.94021	0.710445				668.354	775.887	713.138	678.628	613.623	539.577				-0.0952424	0.0776092	0.140042	0.176028	0.228356	-0.292105	0.0391147	0.0804122
100	297	350.426	707.043	1073.11	161.419	299.128	70.6552						2.96583	3.27173	-0.00545731	2.67727	0.337552	1.4697	1.7861	0.57158				662.372	826.124	705.819	671.936	615.097	599.397				-0.103341	0.147382	0.128343	0.164431	0.231307	-0.213624	0.0590829	0.0716714
101	300	393.795	755.617	1090.41	187.667	309.413	48.8161						3.45664	3.5652	0.0105761	3.2752	0.383541	0.70633	1.89958	0.692378				646.571	783.626	701.693	644.571	636.604	591.293				-0.124731	0.0883581	0.121745	0.117009	0.27436	-0.224257	0.0420808	0.0745694
102	303	369.883	784.386	1102.26	163.871	309.833	67.272						3.18603	3.73901	0.0215565	2.73312	0.385417	1.35144	1.90276	0.628578				653.699	854.004	698.878	557.028	592.294	562.241				-0.115081	0.186104	0.117246	-0.0346979	0.185659	-0.262371	0.0128097	0.0741961
103	306	352.089	768.518	1053.04	175.097	297.636	67.9962						2.98465	3.64314	-0.0240574	2.98885	0.330879	1.37676	1.88337	0.628142				663.485	857.279	736.507	526.096	620.168	556.287				-0.101835	0.190653	0.177401	-0.0883021	0.241458	-0.270183	0.0248655	0.0843758
104	309	363.905	700.29	1159	225.401	283.773	64.8084						3.11837	3.23093	0.0741413	4.13483	0.26889	1.26533	2.01542	0.696837				664.45	858.577	697.626	516.13	556.107	559.891				-0.100528	0.192456	0.115244	-0.105573	0.113219	-0.265454	-0.00843926	0.0717469
105	312	332.736	734.505	1110.29	205.495	330.051	53.2184						2.76563	3.43765	0.0289989	3.68134	0.475824	0.860209	1.87494	0.65557				639.644	832.875	700.892	507.625	589.656	562.636				-0.134108	0.156759	0.120466	-0.120312	0.180379	-0.261852	-0.00977807	0.0757353
106	315	353.739	660.977	1146.54	165	325.499	65.1264						3.00332	2.99341	0.0625928	2.75884	0.455468	1.27644	1.75835	0.544109				652.805	824.106	734.685	508.804	546.744	615.939				-0.116292	0.14458	0.174489	-0.118268	0.0944771	-0.191922	-0.00215612	0.0644446
107	318	348.04	730.716	1194.05	174.025	339.754	61.8008						2.93882	3.41476	0.106623	2.96444	0.519208	1.1602	1.85067	0.582013				670.925	791.327	763.635	573.77	568.372	558.719				-0.0917621	0.0990538	0.220768	-0.00568491	0.137772	-0.266991	0.015526	0.0720699
108	321	344.963	638.792	1243.5	159.004	343.298	56.908						2.904	2.85938	0.152454	2.62223	0.535054	0.989176	1.67705	0.513109				693.6	740.89	765.864	579.098	579.031	681.451				-0.0610677	0.0290033	0.224331	0.00354721	0.159109	-0.105975	0.0414913	0.0520014
109	324	359.969	615.832	1251.26	145.068	364.617	60.1456						3.07383	2.72066	0.159643	2.30477	0.630383	1.10234	1.66527	0.488591				698.908	777.347	749.331	541.16	589.787	680.563				-0.0538817	0.0796374	0.197902	-0.0621967	0.18064	-0.107139	0.0391604	0.0539096
110	327	301.816	620.396	1282.2	176.179	397.73	58.4291						2.4157	2.74824	0.188321	3.01351	0.77845	1.04234	1.69776	0.479696				698.433	803.2	782.715	545.504	608.512	613.719				-0.0545249	0.115543	0.25127	-0.05467	0.218124	-0.194834	0.0468182	0.0718414
111	330	326.534	616.703	1360.02	126.993	402.139	62.9923						2.69544	2.72592	0.260445	1.893	0.798164	1.20185	1.5958	0.414299				697.646	782.908	773.922	539.728	585.526	641.227				-0.0555906	0.0873603	0.237214	-0.064679	0.172111	-0.158745	0.0362784	0.0627432
112	333	342.138	584.957	1323.25	152.237	443.385	44.41						2.87203	2.53413	0.226363	2.46808	0.982597	0.552318	1.60592	0.469386				670.464	803.672	792.329	593.114	607.453	488.186				-0.0923872	0.1162	0.266639	0.0278364	0.216004	-0.359527	0.0291275	0.093939
113	336	340.534	593.792	1367.33	133.763	466.366	71.5019						2.85388	2.5875	0.267218	2.04724	1.08536	1.49929	1.72341	0.396119				607.029	829.984	787.646	582.808	629.038	532.571				-0.17826	0.152743	0.259153	0.00997645	0.259214	-0.301296	0.0335883	0.0954932
114	339	308.279	501.551	1360.28	105.201	475.54	71.567						2.48884	2.03021	0.260683	1.39656	1.12637	1.50157	1.46737	0.312983				678.284	734.432	764.957	551.26	591.341	517.779				-0.0818013	0.0200333	0.222881	-0.0446946	0.183752	-0.320703	-0.00342205	0.0806869
115	342	291.877	840.254	1334.33	168.745	477.122	68.2912						2.30322	4.07655	0.23663	2.84416	1.13345	1.38707	1.99685	0.55835				677.895	828.744	795.307	612.31	619.05	480.735				-0.0823276	0.151021	0.271401	0.0611016	0.239219	-0.369302	0.0451854	0.0980368
116	345	321.209	835.495	1266.92	117.803	478.362	82.1724						2.63517	4.0478	0.174161	1.68365	1.13899	1.87227	1.92534	0.540212				627.377	828.828	791.618	605.717	585.315	657.3				-0.150713	0.151138	0.265503	0.0496771	0.171689	-0.137658	0.0582727	0.0698975
117	348	294.328	868.162	1361.71	108.968	491.236	66.5862						2.33096	4.24516	0.262008	1.48237	1.19656	1.32747	1.80742	0.557199				560.37	824.737	791.477	561.094	581.043	678.812				-0.241422	0.145456	0.265278	-0.0276519	0.163136	-0.109436	0.03256	0.0780614
118	351	312.368	842.356	1353.4	114.244	507	83.1264						2.53512	4.08925	0.254308	1.60257	1.26705	1.90562	1.94232	0.528611				651.021	789.452	792.526	575.155	614.498	654.585				-0.118707	0.0964491	0.266955	-0.00328581	0.230107	-0.141221	0.0550495	0.0705641
119	354	329.77	781.274	1291.51	112.441	506.67	73.6552						2.73206	3.72021	0.196952	1.5615	1.26557	1.57456	1.84181	0.500284				700.318	815.44	774.685	535.724	632.595	655.66				-0.051973	0.132544	0.238434	-0.071617	0.266334	-0.13981	0.0623186	0.0705757
120	357	365.258	810.026	1273.26	122.541	496.017	74.1111						3.13368	3.89392	0.180036	1.79159	1.21794	1.5905	1.96794	0.547754				656.153	837.295	775.889	576.5	602.133	629.04				-0.111759	0.162897	0.240357	-0.000954647	0.205355	-0.174735	0.0535267	0.0712531
121	360	306.985	780.838	1197.35	131.129	488.505	66.705						2.47419	3.71758	0.109681	1.98723	1.18435	1.33162	1.80078	0.504059				699.115	832.373	769.147	577.046	623.313	590.769				-0.0536016	0.156062	0.22958	-7.93691e-06	0.247753	-0.224944	0.0591402	0.0754832
122	363	305.736	744.419	1153.65	100.491	466.936	81.3678						2.46007	3.49755	0.069181	1.28927	1.0879	1.84415	1.70802	0.484156				689.785	824.449	770.23	558.03	620.858	562.395				-0.0662309	0.145056	0.231311	-0.0329617	0.242839	-0.262168	0.042974	0.0809611
123	366	321.224	826.178	1212.78	99.8638	426.413	63.8008						2.63534	3.99151	0.123982	1.27498	0.906706	1.23011	1.69377	0.56687				725.841	813.222	773.407	593.694	617.566	530.688				-0.0174223	0.129464	0.236389	0.0288417	0.23625	-0.303767	0.0516258	0.0828398
124	369	272.764	818.634	1293.11	101.968	382.94	52.2912						2.08691	3.94593	0.198431	1.32291	0.712315	0.827799	1.51572	0.551461				733.77	796.363	783.538	566.61	588.832	527.565				-0.00668856	0.106048	0.252586	-0.018093	0.178728	-0.307864	0.0341195	0.080655
125	372	302.325	793.746	1328.05	107.613	432.493	65.8046						2.42146	3.79556	0.230816	1.45151	0.933889	1.30015	1.6889	0.512452				717.799	861.193	755.944	577.557	591.488	547.802				-0.0283091	0.196089	0.208473	0.000876907	0.184046	-0.281314	0.0466436	0.0780321
126	375	265.88	759.531	1386.79	88.0072	418.839	60.9847						2.00901	3.58885	0.28525	1.00488	0.872839	1.13167	1.48208	0.478547				692.287	792.428	782.481	564.315	584.979	558.253				-0.0628441	0.100583	0.250896	-0.0220708	0.171015	-0.267603	0.0283294	0.076058
127	378	298.344	802.175	1357.55	111.341	415.702	49.6513						2.3764	3.84649	0.258152	1.53643	0.858812	0.735523	1.60197	0.540085				685.515	725.955	774.824	559.696	585.353	542.38				-0.0720115	0.00825992	0.238656	-0.0300756	0.171765	-0.288428	0.00469419	0.0765238
128	381	328.549	787.34	1330.26	85.7419	421.887	55.9004						2.71824	3.75686	0.232859	0.953271	0.886464	0.953956	1.58361	0.551203				734.201	783.186	735.408	548.872	586.327	538.387				-0.00610497	0.0877466	0.175644	-0.0488327	0.173715	-0.293666	0.0147502	0.0721302
129	384	287.276	774.805	1367.75	120.039	453.747	89.4368						2.25115	3.68113	0.267609	1.7346	1.02893	2.1262	1.84827	0.475453				714.657	770.412	752.168	522.473	584.927	568.514				-0.032562	0.0700061	0.202436	-0.0945802	0.170911	-0.254141	0.0103449	0.0704848
130	387	304.607	754.307	1304.52	97.8889	422.754	69.7548						2.44729	3.55728	0.209008	1.22999	0.890343	1.43823	1.62869	0.48804				732.684	828.235	741.355	537.384	598.076	537.059				-0.00815896	0.150314	0.185151	-0.0687402	0.197233	-0.295408	0.0267319	0.078219
131	390	304.531	755.158	1367.76	90.4229	401.146	60.2222						2.44642	3.56243	0.267617	1.05991	0.793722	1.10502	1.53919	0.500247				706.914	813.839	753.596	592.173	594.616	551.326				-0.0430442	0.13032	0.204719	0.0262052	0.190308	-0.276691	0.0386361	0.0742183
132	393	299.377	742.139	1310.55	96.3979	389.829	45.8353						2.3881	3.48377	0.214597	1.19602	0.743118	0.602138	1.43796	0.510707				740.523	807.249	736.568	585.537	588.841	549.328				0.00245291	0.121168	0.177498	0.0147067	0.178747	-0.279312	0.0358769	0.0703924
133	396	308.607	699.845	1339.14	81.6416	383.068	66.0536						2.49256	3.22824	0.241095	0.859863	0.71289	1.30885	1.47392	0.469702				730.59	817.658	721.713	542.546	595.953	540.893				-0.0109935	0.135625	0.15375	-0.0597947	0.192983	-0.290378	0.0201987	0.0741268
134	399	301.617	727.521	1075.47	84.0681	388.113	69.9502						2.41344	3.39546	-0.00327733	0.915141	0.735449	1.44506	1.48354	0.503818				776.442	810.279	705.722	534.582	616.273	515.37				0.0510775	0.125376	0.128188	-0.0735968	0.23366	-0.323864	0.0234734	0.0809022
135	402	283.969	668.581	1148.26	88.362	358.812	67.6398						2.21373	3.03936	0.0641885	1.01296	0.604425	1.3643	1.38316	0.444085				719.377	780.949	709.168	563.852	591.642	527.229				-0.0261721	0.0846408	0.133695	-0.0228725	0.184355	-0.308304	0.00755687	0.0718661
136	405	286.469	678.053	1159.39	117.018	354.064	44.4444						2.24202	3.09658	0.074504	1.66576	0.583197	0.55352	1.36926	0.47585				754.316	808.961	719.516	569.872	566.154	549.516				0.0211248	0.123545	0.150238	-0.0124408	0.133332	-0.279066	0.0227889	0.0660744
137	408	311.617	671.838	1095.43	90.5484	359.325	53.6935						2.52662	3.05904	0.0152221	1.06277	0.606723	0.876815	1.35786	0.481157				762.843	814.888	704.494	569.897	590.1	581.174				0.0326676	0.131778	0.126224	-0.0123977	0.181266	-0.237532	0.0370009	0.0620707
138	411	303.5	681.762	1104.08	87.8208	388.717	31.4291						2.43476	3.11899	0.0232448	1.00063	0.738148	0.0985803	1.23573	0.518023				730.797	807.681	741.757	558.664	580.493	561.36				-0.0107134	0.121767	0.185794	-0.0318641	0.162036	-0.263527	0.0272487	0.0687323
139	414	299.905	699.696	1099.82	84.1255	349.281	32.3487						2.39407	3.22735	0.0192919	0.916448	0.561807	0.130724	1.20828	0.534186				757.429	779.37	738.282	592.913	580.462	534.953				0.0253389	0.0824478	0.180239	0.0274879	0.161974	-0.298172	0.0298859	0.07082
140	417	290.344	695.865	1123.57	88.7455	337.302	35.7471						2.28587	3.2042	0.041309	1.0217	0.508245	0.249513	1.21847	0.514787				805.983	789.981	750.315	591.831	623.839	576.583				0.0910665	0.0971841	0.199474	0.025613	0.248806	-0.243555	0.0697648	0.0707589
141	420	291.819	645.838	975.53	109.796	328.737	35.1992						2.30256	2.90195	-0.0958951	1.50124	0.469945	0.230361	1.21836	0.495094				781.87	799.773	795.14	588.73	624.635	564.652				0.0584245	0.110784	0.271133	0.0202386	0.2504	-0.259208	0.0752953	0.0786302
142	423	278.702	696.924	883.774	97.7348	360.848	28.8927						2.15412	3.2106	-0.180934	1.22648	0.613531	0.00992234	1.17229	0.535915				759.784	744.522	868.794	594.493	635.175	568.099				0.028526	0.0340478	0.388879	0.0302261	0.2715	-0.254686	0.0830821	0.0915195
143	426	311.362	696.442	901.939	83.5627	336.405	37.4291						2.52373	3.20769	-0.164098	0.903627	0.504233	0.308306	1.21391	0.548018				773.205	780.794	949.181	590.655	591.263	578.387				0.0466948	0.0844252	0.517386	0.0235749	0.183596	-0.241188	0.102415	0.101077
144	429	333.524	692.597	833.017	96.871	353.154	32.023						2.77455	3.18446	-0.227974	1.2068	0.579128	0.11934	1.27272	0.576715				768.423	766.885	1011.48	590.719	586.924	586.132				0.0402219	0.0651068	0.61698	0.023686	0.17491	-0.231027	0.11498	0.11427
145	432	266.564	753.584	777.117	95.405	331.959	37.3218						2.01675	3.55292	-0.279781	1.1734	0.484355	0.304555	1.2087	0.568838				756.604	766.426	1065.3	589.103	592.156	593.901				0.0242212	0.0644699	0.703013	0.0208861	0.185384	-0.220834	0.129523	0.126739
146	435	310.555	790.571	796.543	96.1183	358.197	27.7586						2.5146	3.77638	-0.261777	1.18965	0.601677	-0.0297193	1.29847	0.640699				772.81	788.617	1062.75	589.657	570.51	592.332				0.0461607	0.0952903	0.698947	0.0218451	0.142051	-0.222893	0.130234	0.124941
147	438	280.295	813.753	797.552	78.6774	341.647	30.977						2.17214	3.91644	-0.260842	0.792336	0.527672	0.0827775	1.20509	0.640947				783.038	768.433	1079.84	578.929	636.419	603.958				0.0600063	0.0672574	0.726258	0.00325434	0.27399	-0.20764	0.153854	0.130607
148	441	314.73	767.67	711.561	83.6738	359.615	23.3295						2.56185	3.63802	-0.340538	0.906158	0.608016	-0.184535	1.19816	0.646156				783.454	784.337	1056.53	562.756	611.353	576.648				0.060569	0.0893449	0.689004	-0.024772	0.223812	-0.243469	0.132415	0.127953
149	444	305.319	707.954	732.017	103.398	324.274	35.9387						2.45534	3.27723	-0.321579	1.35549	0.449991	0.25621	1.24545	0.567774				744.914	806.263	1067.59	582.484	611.45	573.603				0.00839677	0.119798	0.706679	0.00941532	0.224007	-0.247465	0.136805	0.130771
150	447	367.874	646.201	683.356	81.8136	356.026	32.1647						3.16329	2.90414	-0.366677	0.863781	0.591968	0.124293	1.21347	0.60144				752.347	797.649	1043.32	568.036	639.076	599.889				0.0184588	0.107835	0.667879	-0.015623	0.279308	-0.212978	0.140813	0.124188
151	450	300.801	602.254	762.974	91.5771	326.775	35.4981						2.40421	2.63863	-0.292889	1.0862	0.461174	0.240809	1.08969	0.488342				788.565	798.9	1025.82	583.957	633.535	631.524				0.0674879	0.109571	0.639911	0.0119685	0.268217	-0.171476	0.15428	0.113243
152	453	347.485	639.941	677.417	90.914	345.711	16.1379						2.93254	2.86632	-0.372181	1.0711	0.545845	-0.435912	1.10128	0.614067				836.287	778.418	1017.76	614.644	615.927	570.826				0.13209	0.0811256	0.627023	0.0651471	0.232967	-0.251108	0.147874	0.116556
153	456	355.003	596.129	749.97	104.961	347.334	36.9004						3.01763	2.60162	-0.304941	1.39109	0.553103	0.289825	1.25805	0.54149				820.019	800.058	1009.34	583.989	598.351	640.512				0.110068	0.111181	0.613553	0.0120239	0.197784	-0.159684	0.147487	0.105699
154	459	339.181	602.858	642	84.8136	338.762	33.9579						2.83857	2.64228	-0.405005	0.932124	0.514775	0.186973	1.11829	0.543708				809.92	818.689	1033.1	579.787	664.256	641.569				0.0963957	0.137056	0.651547	0.00474069	0.329713	-0.158297	0.176859	0.115283
155	462	324.945	577.759	703.004	95.595	336.814	34.4789						2.67745	2.49064	-0.348468	1.17773	0.506062	0.205184	1.1181	0.505893				794.287	823.106	1011.84	548.434	660.974	682.162				0.0752343	0.14319	0.617555	-0.0495914	0.323143	-0.105041	0.167415	0.109131
156	465	333.543	589.01	726.609	91.9176	345.893	19.3946						2.77476	2.55861	-0.326592	1.09396	0.546659	-0.322077	1.05422	0.556282				821.364	837.813	1003.53	581.977	618.979	617.897				0.111888	0.163616	0.604267	0.00853654	0.239077	-0.189353	0.156339	0.108145
157	468	335.396	539.911	720.991	72.9498	344.484	19.4444						2.79573	2.26197	-0.331798	0.661857	0.540359	-0.320336	0.93463	0.536475				843.803	863.011	996.67	599.649	622.493	640.115				0.142264	0.198614	0.593304	0.0391623	0.246112	-0.160205	0.176542	0.102056
158	471	317.822	537.888	706.861	55.3011	361.101	19.6207						2.59684	2.24975	-0.344894	0.259805	0.61466	-0.314173	0.843665	0.522727				801.423	935.68	1019.26	604.144	695.822	669.498				0.0848943	0.299542	0.629411	0.0469512	0.392903	-0.121656	0.222008	0.110867
159	474	348.853	556.511	715.361	67.0323	351.608	25.023						2.94802	2.36227	-0.337016	0.527051	0.572215	-0.12534	0.9912	0.551083				813.058	1145.62	995.395	564.827	712.813	684.575				0.100644	0.591126	0.591266	-0.0211827	0.426915	-0.101875	0.264482	0.126824
160	477	324.718	520.993	744.822	56.7383	361.507	35.6858						2.67488	2.14768	-0.309712	0.292545	0.61648	0.24737	0.944874	0.484202				817.013	1281.88	955.705	605.367	787.038	680.741				0.105999	0.780365	0.527816	0.0490697	0.575499	-0.106905	0.321974	0.143971
161	480	365.012	526.36	791.122	62.2939	333.514	24.4598						3.1309	2.1801	-0.266802	0.419106	0.491307	-0.145026	0.968265	0.560934				840.425	1283.63	967.414	562.578	918.138	670.609				0.137692	0.782798	0.546535	-0.0250802	0.837936	-0.120198	0.359947	0.170321
162	483	323.227	534.713	759.017	51.9785	340.422	18.7969						2.65801	2.23057	-0.296556	0.184113	0.522195	-0.342969	0.825894	0.531037				800.287	1261.33	964.275	564.787	946.756	698.81				0.0833565	0.751833	0.541517	-0.0212536	0.895224	-0.0831995	0.361246	0.172361
163	486	323.163	531.554	803.748	58.2151	348.955	20.751						2.65728	2.21148	-0.2551	0.326188	0.560351	-0.274665	0.870924	0.515159				810.193	1284.34	992.043	603.867	984.742	690.026				0.0967665	0.783787	0.585908	0.0464703	0.971265	-0.0947245	0.398245	0.179802
164	489	348.117	502.36	787.078	53.1398	364.814	14.4981						2.93969	2.0351	-0.270549	0.210568	0.631264	-0.49323	0.842141	0.556403				799.896	1270.24	930.441	614.233	959.306	695.567				0.0828274	0.764203	0.487429	0.0644349	0.920347	-0.0874543	0.371965	0.169031
165	492	365.141	469.911	829.565	85.6308	373.739	9.9923						3.13236	1.83905	-0.231173	0.95074	0.671172	-0.650727	0.951905	0.565342				819.881	1237.86	944.138	609.077	971.294	748.239				0.109881	0.719234	0.509325	0.0554988	0.944344	-0.0183517	0.386655	0.161964
166	495	337.939	448.017	841.117	56.405	385.068	18.682						2.82451	1.70677	-0.220467	0.284952	0.721833	-0.346985	0.828436	0.501475				822.146	1234.46	940.933	630.915	946.381	789.089				0.112946	0.714505	0.504202	0.0933431	0.894475	0.035241	0.392452	0.148708
167	498	314.015	446.779	796.822	74.6129	371.764	23.5287						2.55376	1.6993	-0.261519	0.699743	0.662344	-0.177572	0.862676	0.446181				812.542	1242.55	953.045	610.011	944.329	826.043				0.099946	0.725744	0.523565	0.0571177	0.890367	0.0837234	0.396744	0.149377
168	501	329.476	475.531	820.848	88.1004	345.268	23.5211						2.72873	1.87301	-0.239252	1.007	0.543864	-0.177838	0.955919	0.478544				804.393	1212.05	964.976	625.169	915.412	875.984				0.0889139	0.683381	0.542638	0.0833864	0.83248	0.149243	0.396674	0.135095
169	504	316.546	483.353	780.722	74.8351	378.542	22.4483						2.5824	1.92027	-0.276441	0.704805	0.692648	-0.215337	0.901391	0.468348				795.808	1232.46	977.005	618.803	921.543	952.8				0.0772933	0.711738	0.561867	0.0723534	0.844752	0.250021	0.419671	0.135751
170	507	335.255	454.046	867.052	81.9713	350.799	23.3908						2.79413	1.7432	-0.196431	0.867374	0.568596	-0.182392	0.932413	0.475291				768.519	1208.78	938.931	611.884	894.291	1322.65				0.0403516	0.678843	0.501001	0.0603646	0.7902	0.735249	0.467668	0.13782
171	510	326.644	437.135	842.387	72.7491	378.383	22.8199						2.69669	1.64103	-0.21929	0.657285	0.69194	-0.202348	0.877551	0.459868				795.506	1172.48	947.595	625.452	864.173	1457.07				0.0768835	0.628421	0.514851	0.0838767	0.729909	0.911589	0.490922	0.140317
172	513	356.095	423.842	898.139	72.0896	360.64	27.4674						3.02999	1.56072	-0.16762	0.642261	0.612602	-0.0398979	0.939675	0.487722				788.278	1202.71	956.465	628.867	843.19	1399.69				0.067099	0.670409	0.529032	0.089794	0.687904	0.836321	0.480093	0.133116
173	516	319.555	453.482	835.909	81.2366	363.265	17.4138						2.61646	1.73979	-0.225294	0.850637	0.624341	-0.391314	0.869104	0.471097				795.839	1181.2	950.353	646.406	880.41	1419.52				0.0773348	0.640543	0.51926	0.120188	0.762412	0.862337	0.497013	0.134551
174	519	314.589	402.538	817.735	76.4695	360.735	14.6628						2.56025	1.43201	-0.242137	0.742038	0.613023	-0.487473	0.769619	0.457324				829.657	1185.5	935.428	700.829	870.356	1462.76				0.123115	0.646506	0.495402	0.214502	0.742285	0.919066	0.523479	0.125969
175	522	318.359	376.68	888.63	81.957	364.118	13.1303						2.60292	1.27578	-0.176433	0.867048	0.628152	-0.54104	0.776071	0.456774				817.418	1153.69	930.441	712.548	881.353	1421.93				0.106546	0.602326	0.487429	0.23481	0.7643	0.865495	0.510151	0.120911
176	525	285.006	422.304	930.691	89.6057	352.358	26.3257						2.22546	1.55143	-0.137451	1.04129	0.575566	-0.0798052	0.862748	0.380106				822.686	1157.48	929.567	712.996	863.858	1412.63				0.113678	0.607596	0.486032	0.235587	0.729278	0.85329	0.504243	0.116648
177	528	308.129	399.62	908.126	84.2115	341.644	18.4406						2.48714	1.41438	-0.158364	0.918407	0.527663	-0.355423	0.805635	0.430712				807.036	1135.24	920.214	912.559	849.026	1380.14				0.0924927	0.576699	0.47108	0.581418	0.699588	0.810663	0.538657	0.101125
178	531	309.712	373.845	947.052	75.9426	369.437	14.3793						2.50506	1.25865	-0.122288	0.730035	0.651936	-0.497383	0.754335	0.434577				805.058	1102.44	915.7	963.753	796.521	1472.65				0.0898139	0.531145	0.463863	0.670135	0.594483	0.93203	0.546912	0.11282
179	534	303.859	374.67	929.087	89.6667	355.666	14.4521						2.43882	1.26364	-0.138938	1.04268	0.59036	-0.494838	0.783621	0.430509				796.887	1121.27	911.901	990.416	807.687	1434.97				0.0787534	0.557299	0.45779	0.716342	0.616835	0.882607	0.551604	0.111561
180	537	306.393	327.214	937.226	89.595	366.373	25.1188						2.46749	0.976927	-0.131395	1.04105	0.638234	-0.121991	0.81172	0.392125				781.115	1111.5	908.708	957.331	835.019	1405.92				0.0574025	0.543729	0.452686	0.659006	0.671548	0.844493	0.538144	0.110257
181	540	314.613	344.333	1047.58	76.1864	365.833	24.7165						2.56053	1.08035	-0.0291225	0.735589	0.635821	-0.136054	0.807853	0.39885				830.077	1117.23	911.294	990.452	837.986	1365.02				0.123682	0.551695	0.45682	0.716403	0.677487	0.790833	0.55282	0.098713
182	543	300.613	313.152	977.13	81.6272	375.82	15.2146						2.40209	0.891965	-0.0944123	0.859535	0.680479	-0.468185	0.711912	0.406395				806.96	1082	906.866	978.167	828.794	1367.63				0.092389	0.502761	0.449741	0.695114	0.659087	0.794258	0.532225	0.102048
183	546	329.402	301.389	1021.17	96.0574	364.777	18.9808						2.72789	0.8209	-0.0535976	1.18827	0.631101	-0.336541	0.829671	0.443906				817.303	1051.5	893.356	947.986	773.362	1371.83				0.10639	0.460405	0.428144	0.642811	0.548124	0.799765	0.497607	0.0956026
184	549	347.135	304.459	1010.9	92.2366	317.306	32.4368						2.92858	0.839444	-0.0631112	1.10123	0.418834	0.133804	0.89313	0.443666				844.571	1063.26	890.886	966.306	784.116	1386.02				0.143304	0.476728	0.424196	0.674559	0.56965	0.818379	0.517803	0.0945702
185	552	272.077	421.261	1103.89	78.8459	376.278	29.6054						2.07914	1.54512	0.0230635	0.796175	0.682528	0.0348342	0.860143	0.335292				787.921	1033.96	867.855	939.135	811.692	1365.24				0.0666166	0.436036	0.387378	0.627474	0.624852	0.791116	0.488912	0.103351
186	555	345.15	487.182	1054.83	88.1111	356.878	23.931						2.90612	1.9434	-0.0224013	1.00724	0.595779	-0.16351	1.04444	0.485591				824.877	1037.18	918	955.671	766.649	1330.32				0.116644	0.440509	0.46754	0.656129	0.534685	0.745312	0.49347	0.0888924
187	558	295.187	519.617	1012.87	85.0538	350.561	36.7931						2.34068	2.13936	-0.0612899	0.937596	0.567533	0.286075	1.03499	0.40477				856.17	1005.52	902.372	960.827	762.569	1354.83				0.159006	0.396547	0.442557	0.665065	0.526517	0.777457	0.494525	0.088512
188	561	344.298	520.644	1039.21	104.079	367.707	23.364						2.89647	2.14556	-0.0368792	1.371	0.644199	-0.183329	1.1395	0.501058				1083.65	1040.82	879.213	996.954	761.111	1331.23				0.466941	0.445566	0.405534	0.72767	0.523599	0.746497	0.552635	0.0604176
189	564	312.626	498.743	1060.64	83.5663	365.403	28.8123						2.53804	2.01325	-0.0170139	0.903709	0.633897	0.00711202	1.01316	0.430296				1166.05	989.745	892.751	941.365	750.002	1320.88				0.578487	0.374631	0.427177	0.631337	0.501361	0.732926	0.540987	0.0543468
190	567	289.38	484.152	1111.83	105.581	360.91	28.6705						2.27496	1.92509	0.0304212	1.40521	0.613809	0.00215551	1.04194	0.396648				1132.86	971.617	868.867	895.964	762.72	1296.72				0.533569	0.349454	0.388995	0.552661	0.52682	0.701229	0.508788	0.0515219
191	570	310.638	510.766	1055.39	90.276	358.848	35.6437						2.51554	2.08589	-0.0218855	1.05656	0.604588	0.245898	1.0811	0.416694				1175.27	950.395	856.697	914.776	723.941	1334.38				0.590974	0.319979	0.36954	0.58526	0.449191	0.750632	0.510929	0.0657404
192	573	318.156	482.327	1049.95	119.276	342.582	25.4751						2.60063	1.91407	-0.0269263	1.71721	0.531856	-0.109537	1.10455	0.460114				1157.09	995.582	870.431	956.697	740.083	1305.32				0.566358	0.382739	0.391495	0.657908	0.481504	0.71251	0.532086	0.0560321
193	576	350.896	448.729	986.539	104.405	368.505	29.9847						2.97114	1.71108	-0.0856925	1.37843	0.647771	0.0480924	1.1118	0.471458				1166.17	962.324	836.327	919.493	746.296	1292.71				0.578656	0.336548	0.336975	0.593435	0.493942	0.695958	0.505919	0.0595642
194	579	325.586	441.439	1051.67	87.8315	343.767	37.4215						2.68471	1.66703	-0.0253348	1.00087	0.537152	0.30804	1.02875	0.409169				1150.44	947.159	881.547	929.544	730.86	1292.35				0.557357	0.315485	0.409265	0.610854	0.463042	0.695489	0.508582	0.0568615
195	582	322.252	424.627	1066.8	81.4158	335.229	33.7471						2.64697	1.56546	-0.0113081	0.854719	0.498976	0.179604	0.955738	0.407776				1113.6	937.408	850.021	911.411	756.149	1306.63				0.507495	0.301942	0.358868	0.579429	0.513666	0.714222	0.495937	0.0609615
196	585	319.712	453.719	1125.45	95.6487	353.216	26.1188						2.61823	1.74123	0.0430497	1.17896	0.579406	-0.0870372	1.01231	0.427142				1109.92	958.018	835.293	920.569	720.739	1258.71				0.502506	0.330567	0.335323	0.5953	0.442782	0.651357	0.476306	0.0540768
197	588	336.034	426.789	1081.11	87.957	372.383	41						2.80295	1.57852	0.00195287	1.00373	0.665111	0.433124	1.0809	0.407253				1137.05	929.116	872.872	885.564	724.45	1257.28				0.539235	0.290425	0.395397	0.534638	0.450211	0.649477	0.476564	0.051358
198	591	345.476	414.248	1088.6	90.9498	351.518	30.1379						2.9098	1.50275	0.00889577	1.07191	0.571813	0.0534474	1.01977	0.44589				1113.37	939.808	854.408	858.689	697.265	1255.58				0.507176	0.305276	0.36588	0.488064	0.395792	0.647255	0.451574	0.0498573
199	594	339.933	456.66	1041.98	71.7061	379.627	39.8123						2.84707	1.759	-0.0343083	0.633524	0.697503	0.391609	1.04907	0.433553				1093.87	907.957	828.928	856.174	708.474	1287.35				0.480784	0.261039	0.325148	0.483707	0.418229	0.688937	0.442974	0.0608776
200	597	367.951	392.842	1119.32	76.7814	363.91	31.59						3.16416	1.37343	0.0373641	0.749144	0.627223	0.104204	1.00925	0.474466				1063.98	923.319	833.041	900.53	726.467	1272.74				0.440323	0.282374	0.331722	0.560573	0.454248	0.669763	0.456501	0.0584433
201	600	318.083	394.3	1097.54	90.8531	361.752	34.2261						2.59979	1.38224	0.0171845	1.06971	0.617571	0.196347	0.980474	0.385835				1121.74	938.004	806.376	942.676	685.37	1240.74				0.518507	0.302769	0.289094	0.63361	0.371979	0.627776	0.457289	0.0641213
202	603	344.982	397.393	1154.57	90.2401	381.895	49.2452						2.90421	1.40092	0.0700312	1.05574	0.707643	0.721328	1.14331	0.395584				1097.84	948.905	826.727	893.817	680.237	1260.09				0.486152	0.31791	0.321629	0.548939	0.361704	0.653162	0.448249	0.0559986
203	606	320.69	365.37	1151.88	78.9713	363.443	38.6398						2.6293	1.20745	0.067541	0.799031	0.625136	0.350625	0.946514	0.372047				1107.41	904.652	805.721	866.502	685.37	1201.54				0.499106	0.256448	0.288048	0.501604	0.371979	0.576359	0.415591	0.0528251
204	609	314.764	359.112	1067.07	93.0394	385.48	34.5632						2.56223	1.16964	-0.0110582	1.11951	0.723671	0.20813	0.962022	0.374194				1089.88	927.303	828.974	884.938	661.49	1222.75				0.475375	0.287908	0.32522	0.533552	0.324177	0.604187	0.42507	0.0533368
205	612	327.132	393.898	1091.71	90.7097	364.925	43.7701						2.7022	1.37981	0.0117769	1.06644	0.631761	0.529951	1.05366	0.381315				1083.21	907.486	812.624	887.158	673.699	1218.93				0.46635	0.260384	0.299084	0.537401	0.348617	0.599175	0.418502	0.055742
206	615	343.58	361.304	1059.41	83.2796	363.028	44.4023						2.88835	1.18288	-0.0181582	0.897178	0.623278	0.552049	1.02093	0.407696				1046.28	901.043	806.036	906.215	674.216	1212.09				0.416361	0.251435	0.288551	0.570425	0.349651	0.590188	0.411102	0.0582443
207	618	314.936	304.624	1130.02	82.6631	354.649	50.364						2.56418	0.840441	0.0472847	0.883134	0.585811	0.760435	0.94688	0.346672				1064.82	910.083	781.848	916.349	695.379	1218.22				0.441462	0.263991	0.249884	0.587986	0.392016	0.598236	0.422263	0.0617735
208	621	350.647	324.429	1114.33	93.2222	386.906	56.4713						2.96833	0.960098	0.0327382	1.12368	0.730048	0.973911	1.13147	0.399861				1071.89	902.953	815.611	869.059	679.815	1199.36				0.451031	0.254088	0.303859	0.506035	0.36086	0.573496	0.408228	0.0502021
209	624	306.564	277.531	1109.87	79.8387	344.099	46.5862						2.46944	0.676757	0.028608	0.818791	0.538636	0.628385	0.860103	0.340279				1058.54	891.82	789	899.564	668.173	1185.28				0.432958	0.238627	0.261317	0.558899	0.337555	0.555017	0.397396	0.0575901
210	627	305.478	308.356	1094.25	88.7133	388.644	46.4904						2.45715	0.862992	0.0141301	1.02096	0.737823	0.625037	0.953016	0.332191				1073.2	876.854	780.921	915.849	647.178	1204.62				0.452805	0.217841	0.248402	0.58712	0.295526	0.58039	0.397014	0.0676678
211	630	292.325	307.97	1055.62	81.9355	403.683	44.6207						2.30829	0.86066	-0.0216679	0.866558	0.805068	0.559683	0.896432	0.314122				1083.68	877.057	787.149	883.628	658.581	1161.57				0.466985	0.218121	0.258359	0.531283	0.318352	0.52392	0.38617	0.0564916
212	633	330.478	270.634	1064.67	104.165	385.989	57.5977						2.74008	0.635084	-0.0132825	1.37296	0.72595	1.01328	1.07901	0.381432				1071.48	895.45	763.554	897.673	636.417	1226.4				0.450469	0.243667	0.220638	0.555621	0.273985	0.608965	0.392224	0.0689345
213	636	316.31	255.142	1085.34	87.3333	384.606	46.9502						2.57973	0.541487	0.00587771	0.989525	0.719765	0.641109	0.912915	0.358515				1052.1	872.843	772.335	871.991	628.14	1182.98				0.42424	0.212269	0.234676	0.511116	0.257416	0.552007	0.365287	0.0610235
214	639	302.948	273.795	1019.74	103.344	395.068	52.6897						2.42851	0.654186	-0.0549192	1.35426	0.766548	0.841728	0.998386	0.340496				1076.53	856.743	756.441	887.463	656.962	1158.75				0.457315	0.189908	0.209268	0.537928	0.315112	0.520209	0.371623	0.0631535
215	642	283.632	220	1034.45	79.6846	382.57	29.3027						2.20991	0.329171	-0.0412915	0.815281	0.710659	0.0242536	0.674663	0.338282				1059.96	852.889	766.817	908.409	635.377	1181.32				0.434877	0.184556	0.225855	0.574227	0.271903	0.549824	0.37354	0.0690337
216	645	323.908	232.221	1015.14	84.3728	377.979	50.6054						2.66572	0.403007	-0.0591824	0.922082	0.69013	0.768873	0.898438	0.380636				1079.59	855.663	754.188	835.833	651.6	1123.27				0.461456	0.188408	0.205666	0.448456	0.304378	0.473672	0.347006	0.0536603
217	648	294.15	198.571	967.048	92.509	372.799	44.4751						2.32895	0.199703	-0.103757	1.10743	0.666968	0.554593	0.792314	0.350566				1084.66	868.086	729.183	916.278	636.59	1138.06				0.468308	0.205663	0.165692	0.587863	0.274331	0.493068	0.365821	0.0707273
218	651	302.377	224.99	1037.77	89.0143	396.501	43.3448						2.42205	0.359319	-0.0382131	1.02782	0.772954	0.515085	0.843169	0.348831				1061.49	830.93	746.269	892.765	636.102	1103.09				0.436952	0.154058	0.193007	0.547117	0.273354	0.447194	0.341947	0.0643915
219	654	297.81	235.786	1025.07	113.179	390.692	50.2031						2.37036	0.424542	-0.0499872	1.57832	0.746977	0.754811	0.970837	0.35426				1077.43	842.756	722.359	881.795	627.199	1090.74				0.458531	0.170482	0.154783	0.528107	0.255532	0.430989	0.333071	0.0652179
220	657	275.522	208.739	1047.01	97.3405	396.281	45.4368						2.11812	0.261137	-0.0296463	1.2175	0.771967	0.588209	0.821214	0.312697				1058.45	846.602	747.95	890.577	630.443	1086.07				0.432839	0.175823	0.195693	0.543324	0.262027	0.424863	0.339095	0.0608317
221	660	314.997	201.317	1075.17	89.8064	445.867	64.1839						2.56487	0.216293	-0.00355537	1.04586	0.993694	1.2435	1.01011	0.371078				1055.92	841.331	731.148	888.932	590.955	1102.85				0.429411	0.168504	0.168834	0.540475	0.182979	0.446881	0.322847	0.0686069
222	663	309.571	198.64	1088.3	78.1039	404.407	35.2299						2.50346	0.200122	0.00861774	0.779271	0.808304	0.231434	0.755202	0.37415				1050.4	819.886	744.918	879.617	621.258	1055.52				0.421932	0.138718	0.190846	0.524332	0.24364	0.384778	0.317375	0.0610113
223	666	309.936	172.522	1148.95	86.2903	375.242	25.9349						2.50759	0.0423206	0.0648252	0.965764	0.677894	-0.0934653	0.694155	0.400162				1042.54	815.53	743.905	914.041	635.654	1032.9				0.411299	0.132669	0.189228	0.583987	0.272458	0.355101	0.324124	0.0667356
224	669	262.298	190.845	1175.43	95.0107	402.195	37.1877						1.96846	0.153025	0.0893687	1.16442	0.798413	0.299868	0.745593	0.297437				1061.68	831.929	703.01	842.034	610.144	1044.76				0.437212	0.155445	0.123851	0.459202	0.221393	0.370669	0.294628	0.0597486
225	672	292.902	162.746	1127.2	83.724	399.317	38.1609						2.31482	-0.0167405	0.0446696	0.907302	0.785545	0.333885	0.728246	0.352626				1058.82	835.056	719.83	862.915	646.654	1028.76				0.433337	0.159788	0.15074	0.495387	0.294478	0.349677	0.313901	0.0575128
226	675	299.592	167.033	1071.6	91.6774	372.807	35.9502						2.39053	0.00916081	-0.00685953	1.08849	0.667007	0.256612	0.734156	0.373113				1062.93	804.41	709.084	892.756	592.071	1029.26				0.438892	0.117224	0.133561	0.547101	0.185213	0.350336	0.295388	0.0723513
227	678	280.478	171.495	1088.2	87.6846	401.071	41.9617						2.17422	0.0361194	0.00852905	0.997528	0.793387	0.466739	0.746087	0.328182				1027.48	833.155	708.541	887.986	594.348	1039.62				0.390905	0.157148	0.132693	0.538834	0.189772	0.36393	0.295547	0.0657831
228	681	301.159	135.432	1151.22	96.5556	427.97	47.9464						2.40827	-0.181761	0.0669285	1.19962	0.913667	0.67593	0.847109	0.376938				1006.8	802.548	715.251	837.568	614.848	1015.8				0.362913	0.114638	0.14342	0.451462	0.230809	0.332677	0.272653	0.053896
229	684	292.54	181.069	1171.06	112.817	377.852	39.9042						2.31072	0.0939637	0.0853191	1.57007	0.689565	0.394821	0.85741	0.367021				1015.63	803.832	717.035	902.126	590.524	966.126				0.374873	0.116421	0.146272	0.563339	0.182116	0.267505	0.275088	0.0691655
230	687	303.42	158.762	1119.01	111.606	388.229	48.5249						2.43386	-0.0408076	0.0370821	1.54247	0.735965	0.696151	0.900786	0.385733				1040.68	822.915	696.092	882.217	595.635	984.862				0.408784	0.142926	0.112792	0.528838	0.192348	0.292084	0.279629	0.0666036
231	690	305.589	193.911	1242.81	100.237	437.574	53.2644						2.4584	0.171549	0.151818	1.28347	0.956611	0.861817	0.980611	0.347935				1047.32	804.591	726.142	829.655	608.701	966.484				0.417767	0.117476	0.160831	0.43775	0.218504	0.267974	0.27005	0.0541025
232	693	289.098	162.069	1260.63	100.892	438.979	51.8353						2.27177	-0.0208283	0.168335	1.29841	0.962892	0.811863	0.915408	0.338331				1052.03	792.701	677.098	878.724	600.528	986.028				0.424149	0.100962	0.0824278	0.522785	0.202143	0.293614	0.271013	0.0722438
233	696	267.865	177.98	1296.42	94	432.433	54.8008						2.03147	0.0753003	0.201501	1.1414	0.933621	0.91552	0.883135	0.289033				1048.39	796.162	691.465	903.831	568.083	965.741				0.419211	0.105769	0.105396	0.566293	0.137193	0.266999	0.26681	0.0778258
234	699	292.537	178.508	1377.57	107.85	413.818	46.4406						2.31069	0.078491	0.276708	1.4569	0.850386	0.623296	0.932745	0.338435				1029.21	788.67	679.62	890.626	560.479	938.52				0.39325	0.095363	0.0864588	0.54341	0.121971	0.231286	0.24529	0.0761308
235	702	277.647	162.865	1349.99	102.194	420.854	46.8697						2.14218	-0.0160228	0.251145	1.32805	0.881849	0.638295	0.870916	0.318857				1055.28	788.525	715.042	885.678	568.562	918.735				0.428542	0.0951619	0.143086	0.534835	0.138152	0.20533	0.257518	0.0736161
236	705	265.086	163.624	1424.59	98.4695	406.484	52.249						2.00002	-0.0114365	0.320287	1.24322	0.817592	0.826324	0.866	0.28867				1030.66	780.47	696.63	897.822	570.915	975.308				0.395221	0.0839747	0.113653	0.55588	0.142862	0.279551	0.261857	0.0757881
237	708	239.328	148.155	1465.24	119.806	396.377	51.341						1.70852	-0.104894	0.357962	1.72929	0.772398	0.794586	0.87631	0.298276				984.345	792.666	672.365	891.838	563.763	916.423				0.332517	0.100914	0.0748611	0.54551	0.128546	0.202296	0.230774	0.0734495
238	711	262.08	170.924	1445.01	126.409	371.163	51.3065						1.966	0.0326696	0.339209	1.87969	0.659654	0.79338	0.9451	0.327609				1037.04	775.901	689.329	843.251	538.467	941.342				0.403856	0.0776285	0.10198	0.461311	0.0779076	0.234988	0.226279	0.0698596
239	714	270.574	184.314	1485.9	111.788	377.61	45.2682						2.06213	0.113564	0.377103	1.54663	0.688484	0.582315	0.895038	0.305837				1017.64	779.385	686.117	866.902	591.469	954.194				0.377583	0.0824685	0.096846	0.502298	0.184008	0.251849	0.249176	0.0672827
240	717	285.077	180.475	1451.58	101.254	389.405	42.1149						2.22626	0.090375	0.345302	1.30666	0.741222	0.472094	0.863652	0.320827				1002.85	773.213	683.834	853.333	579.057	998.136				0.357573	0.0738953	0.0931956	0.478783	0.159161	0.3095	0.245351	0.0661252
241	720	302.199	170.205	1426.43	122.756	377.957	38.5096						2.42004	0.0283226	0.321987	1.79649	0.690035	0.346074	0.933825	0.389538				1024.81	774.39	659.138	840.261	504.661	933.64				0.387301	0.0755301	0.0537157	0.456131	0.010235	0.224884	0.201299	0.0762006
242	723	316.472	165.168	1473.43	116.767	378.852	51.8736						2.58157	-0.00210512	0.365554	1.66005	0.694037	0.813202	1.01872	0.386012				1027.9	774.404	645.489	860.818	551.209	921.462				0.391476	0.0755506	0.0318971	0.491755	0.103414	0.208908	0.217167	0.0759759
243	726	281.35	184.894	1423.14	132.305	371.595	45.1647						2.18408	0.117074	0.318945	2.01401	0.661587	0.578698	0.979066	0.363458				1004.23	784.986	668.434	794.151	537.844	960.142				0.359433	0.090247	0.0685775	0.376224	0.07666	0.259654	0.205132	0.0589928
244	729	286.463	207.172	1417.97	131.061	397.651	50.5862						2.24195	0.251666	0.31415	1.98568	0.778095	0.768202	1.05662	0.347761				1014.6	798.704	683.104	840.448	567.062	898.808				0.37347	0.109299	0.0920292	0.456455	0.135149	0.179187	0.224265	0.0624103
245	732	273.245	191.696	1367.89	166.914	365.366	46.2031						2.09236	0.158169	0.267734	2.80244	0.633734	0.614994	1.09491	0.444045				1020.1	755.967	677.197	846.007	532.102	942.968				0.380913	0.0499431	0.0825866	0.466088	0.0651663	0.237122	0.213637	0.0726355
246	735	307.264	226.267	1448.28	166.398	372.084	50.4981						2.47735	0.367036	0.342243	2.79068	0.66377	0.765123	1.23437	0.449483				993.715	767.641	668.306	853.121	545.012	983.771				0.345201	0.0661567	0.0683729	0.478416	0.0910094	0.290653	0.223301	0.0708702
247	738	271.341	196.488	1360.13	192.312	364.064	47.7165						2.0708	0.187121	0.260541	3.38102	0.627912	0.667894	1.19922	0.517496				996.23	770.419	654.321	881.552	545.362	980.968				0.348606	0.0700158	0.0460151	0.527684	0.0917114	0.286976	0.228501	0.0784188
248	741	282.212	239.62	1401.9	185.34	368.272	50.4176						2.19384	0.447712	0.299261	3.22221	0.646727	0.762309	1.26201	0.480587				1005.91	747.698	640.05	850.087	518.438	984.986				0.361712	0.0384592	0.023202	0.473158	0.0378145	0.292247	0.204432	0.0801696
249	744	280.528	248.201	1417.1	244.215	360.101	43.3142						2.17478	0.499554	0.313344	4.56342	0.610189	0.514015	1.44588	0.683015				999.51	758.445	684.34	833.374	558.351	984.794				0.353045	0.0533843	0.0940045	0.444194	0.117711	0.291996	0.225723	0.0650768
250	747	315.617	273.987	1375.79	223.785	343.582	35.4789						2.57188	0.655342	0.275056	4.098	0.536328	0.240138	1.39613	0.647139				981.107	771.843	668.968	834.27	523.666	1059.87				0.328134	0.0719931	0.0694304	0.445748	0.048279	0.390485	0.225678	0.074295
251	750	269.598	303.449	1441.18	215.05	325.503	45.1839						2.05109	0.833343	0.335663	3.89902	0.455487	0.579369	1.35899	0.56799				982.69	756.878	660.937	792.251	589.784	1148.43				0.330276	0.0512084	0.0565916	0.372931	0.180636	0.506683	0.249721	0.0750951
252	753	293.442	299.68	1403.64	262.728	341.764	29.5862						2.32093	0.810572	0.300873	4.98515	0.528199	0.0341631	1.49665	0.770853				1014.66	757.915	664.104	823.534	541.092	1202.28				0.373556	0.0526482	0.0616553	0.427142	0.0831635	0.577326	0.262582	0.0922124
253	756	317.748	343.776	1349.43	263.807	373.904	29.4291						2.59601	1.07698	0.250625	5.00973	0.671909	0.0286718	1.60566	0.775519				974.274	775.354	667.606	847.696	566.443	1233.04				0.318884	0.0768692	0.0672542	0.469014	0.133911	0.617674	0.280601	0.0929381
254	759	295.38	309.964	1376.06	244.147	352.188	37.0038						2.34287	0.872703	0.27531	4.56187	0.57481	0.29344	1.48683	0.690159				978.082	735.435	658.114	856.018	540.732	1212.57				0.324039	0.021427	0.0520787	0.483436	0.0824425	0.590821	0.259041	0.0991861
255	762	303.647	344.624	1328.58	222.731	345.218	34.4981						2.43642	1.08211	0.231303	4.074	0.543643	0.205855	1.42889	0.628376				1006.83	776.217	671.969	869.577	563.957	1261.01				0.36296	0.0780681	0.0742282	0.506932	0.128935	0.654378	0.300917	0.100308
256	765	311.445	334.284	1390.72	249.706	344.685	36.3295						2.52467	1.01964	0.288897	4.68851	0.541259	0.26987	1.55547	0.714796				974.352	762.508	655.933	900.383	537.756	1207.62				0.31899	0.0590283	0.0485927	0.560318	0.0764845	0.584331	0.274624	0.102687
257	768	303.46	360.885	1442.8	241.996	331.122	40.5479						2.43431	1.18035	0.337166	4.51288	0.480612	0.417321	1.56044	0.673155				1010.07	764.538	645.749	882.927	537.55	1239.25				0.367335	0.0618471	0.032312	0.530068	0.0760717	0.625834	0.282245	0.106499
258	771	321.73	358.432	1329.95	199.885	322.794	63.1801						2.64107	1.16554	0.232577	3.55355	0.443374	1.20841	1.54075	0.530059				985.852	765.123	664.499	855.552	516.934	1259.12				0.334558	0.0626596	0.0622863	0.482628	0.0348024	0.651899	0.271472	0.105935
259	774	312.11	340.597	1339.39	262.667	359.576	39.9923						2.5322	1.05778	0.241321	4.98376	0.607843	0.3979	1.6368	0.750115				993.427	779.82	638.419	927.356	533.389	1220.72				0.344812	0.0830726	0.0205937	0.607061	0.067742	0.601514	0.287466	0.110353
260	777	308.982	381.577	1377.82	208.502	316.296	36.4138						2.49679	1.30537	0.276942	3.74984	0.414315	0.272817	1.41935	0.584089				1031.56	806.995	651.806	913.63	521.659	1235.34				0.396434	0.120814	0.0419955	0.583274	0.0442612	0.620695	0.301246	0.109004
261	780	335.583	384.914	1345.69	208.939	354.75	45.1494						2.79784	1.32553	0.247164	3.75981	0.586262	0.578163	1.54913	0.579119				979.567	816.452	656.843	1008.8	552.095	1175.51				0.326049	0.133949	0.050048	0.748191	0.105188	0.542206	0.317605	0.113484
262	783	336.209	363.073	1324.31	202.097	328.865	40.6513						2.80493	1.19357	0.227351	3.60393	0.470519	0.420935	1.45354	0.578912				984.425	840.542	656.054	1021.32	545.578	1131.99				0.332626	0.167408	0.0487858	0.7699	0.0921432	0.485108	0.315995	0.112323
263	786	311.914	387.33	1343.18	200.197	343.914	31.1571						2.52998	1.34013	0.244839	3.56066	0.537812	0.0890727	1.38375	0.5699				1011.48	1088.11	644.517	1104.36	568.261	1166.64				0.369248	0.511244	0.0303423	0.913805	0.137549	0.53057	0.41546	0.1289
264	789	320.193	362.04	1335.02	177.796	326.332	30.2452						2.62368	1.18733	0.237275	3.05033	0.459192	0.057198	1.26917	0.52293				990.933	1249.39	667.226	1087.35	572.765	1133.32				0.341435	0.735253	0.0666462	0.88433	0.146567	0.486851	0.443514	0.131901
265	792	312.767	355.739	1354.62	206.194	354.03	31.9732						2.53963	1.14926	0.255436	3.69726	0.583044	0.117599	1.39037	0.584821				1024.59	1272.11	666.628	1076.52	561.45	1132.39				0.386992	0.766802	0.0656901	0.865548	0.123916	0.485629	0.449096	0.133204
266	795	288.414	359.522	1308.88	231.287	368.704	45.6015						2.26403	1.17212	0.213046	4.2689	0.648661	0.593966	1.52679	0.620636				1020.11	1281.61	641.851	1050.15	541.595	1124.61				0.380934	0.779997	0.0260801	0.819862	0.0841692	0.47543	0.427745	0.136831
267	798	316.457	356.644	1332.69	197.272	340.465	40.5671						2.5814	1.15473	0.235111	3.49403	0.522387	0.417992	1.40094	0.545659				1044.14	1259.61	640.128	1014.75	558.296	1100.29				0.413462	0.749436	0.0233264	0.758512	0.117602	0.443523	0.417644	0.125496
268	801	298.202	368.498	1343.01	206.609	327.356	42.4713						2.37481	1.22635	0.244677	3.70673	0.463769	0.484552	1.41681	0.558243				1058.88	1276.43	647.781	1056.99	546.531	1088.9				0.433417	0.7728	0.0355609	0.831715	0.0940502	0.42857	0.432686	0.135068
269	804	350.252	378.462	1321.62	175.383	333.25	36.6015						2.96385	1.28655	0.224852	2.99538	0.490129	0.279378	1.37336	0.531166				1040.02	1224.6	674.297	1042.92	551.035	1081.18				0.407889	0.700812	0.0779493	0.807327	0.103068	0.418443	0.419248	0.121993
270	807	312.85	364.413	1293.25	166.398	361.42	39.0958						2.54057	1.20167	0.19856	2.79068	0.616087	0.366564	1.28569	0.459049				1034.75	1232.24	667.238	964.617	519.962	1052.08				0.400755	0.71143	0.0666652	0.671633	0.0408647	0.380264	0.378602	0.116691
271	810	307.997	353.106	1340.68	186.133	345.934	40.4483						2.48565	1.13335	0.242518	3.24025	0.546841	0.41384	1.34374	0.505221				1053.25	1197.34	646.811	975.222	576.808	994.646				0.425801	0.662955	0.03401	0.690011	0.154659	0.304921	0.378726	0.108687
272	813	295.868	382.205	1272.8	150.204	275.522	32.0843						2.34839	1.30916	0.179609	2.42178	0.231998	0.121482	1.10207	0.443747				1031.75	1167.39	664.998	987.491	556.211	1004.9				0.396683	0.621352	0.0630837	0.711272	0.113428	0.318375	0.370699	0.106934
273	816	339.61	351.931	1278.53	144.269	337.246	35.6973						2.84343	1.12625	0.18492	2.28656	0.507996	0.247772	1.19949	0.458363				1033.54	1171.67	655.827	939.735	555.085	998.385				0.39911	0.627298	0.0484225	0.628513	0.111175	0.309826	0.354058	0.101057
274	819	335.859	352.218	1299.81	145.269	339.45	16.1916						2.80097	1.12799	0.20464	2.30934	0.517848	-0.434035	1.08779	0.511518				1074.14	1109.82	651.414	989.682	580.246	994.512				0.454068	0.541401	0.0413684	0.715068	0.161543	0.304744	0.369699	0.101854
275	822	329.117	364.617	1267.04	135.978	375.278	28.6973						2.72467	1.2029	0.174274	2.0977	0.678056	0.00309229	1.14678	0.442366				1053.62	1119.74	641.851	967.247	592.306	953.415				0.426291	0.555176	0.0260801	0.676191	0.185683	0.250828	0.353375	0.0993326
276	825	311.482	389.389	1238.52	131.523	355.88	39.9195						2.52509	1.35257	0.147837	1.99621	0.591317	0.395356	1.16806	0.388671				1067.21	1072.24	656.925	967.569	568.419	986.945				0.444691	0.489208	0.0501779	0.676749	0.137867	0.294817	0.348918	0.0954012
277	828	318.61	375.584	1269.55	148.588	354.726	34.5632						2.60577	1.26916	0.176595	2.38495	0.586156	0.20813	1.20513	0.439427				1158.71	1050.69	665.026	933.721	612.45	941.935				0.568552	0.459283	0.0631295	0.618091	0.226008	0.235766	0.361805	0.0897148
278	831	354.485	388.323	1220.05	130.05	335.724	40.1188						3.01176	1.34613	0.130719	1.96265	0.501188	0.402322	1.22579	0.452749				1165.05	1019.04	676.489	956.904	598.299	952.482				0.577142	0.415317	0.0814546	0.658266	0.197679	0.249604	0.363244	0.0922375
279	834	310.528	373.871	1301.6	121.828	327.291	41.3602						2.51429	1.25881	0.206297	1.77534	0.463482	0.445714	1.11066	0.370261				1146.3	1000.41	776.764	908.689	607.881	967.156				0.551753	0.389444	0.241757	0.574711	0.216863	0.268855	0.373897	0.0646414
280	837	332.132	368.459	1241.22	138.133	354.816	46.7625						2.75879	1.22611	0.150339	2.14677	0.586558	0.634548	1.25052	0.412691				1159.55	981.546	978.212	953.509	606.773	956.441				0.569688	0.363244	0.563796	0.652383	0.214643	0.254797	0.436425	0.074867
281	840	334.948	377.36	1255.3	146.15	353.469	30.5862						2.79066	1.27989	0.163394	2.32943	0.580536	0.0691173	1.20217	0.467238				1127.04	971.161	1022.51	901.97	617.929	939.828				0.525687	0.348821	0.63461	0.563068	0.236975	0.233002	0.423694	0.0709804
282	843	337.561	360.851	1249.03	131.337	370.912	53.3602						2.82024	1.18015	0.157576	1.99196	0.658533	0.865165	1.27894	0.39612
283	846	353.632	355.502	1290.84	120.147	355.861	29.8429						3.00211	1.14783	0.196327	1.73705	0.591231	0.0431359	1.11961	0.455202
284	849	323.546	387.858	1250.5	137.097	363.615	35.9962						2.66162	1.34332	0.158946	2.12318	0.625902	0.25822	1.1952	0.420687
285	852	358.236	350.561	1197.64	121.305	368.792	39.0307						3.05422	1.11798	0.109951	1.76342	0.649054	0.364288	1.17649	0.445314
286	855	355.831	394.403	1268.92	118.634	334.544	38.1264						3.027	1.38286	0.176011	1.70259	0.495912	0.332679	1.18617	0.444198
287	858	334.344	380.353	1222.39	124.857	350.364	28.9923						2.78382	1.29797	0.132887	1.84434	0.566652	0.0134038	1.10651	0.440783
288	861	373.534	400.759	1192.42	148.022	369.077	27.1264						3.22734	1.42126	0.105112	2.37205	0.650327	-0.0518173	1.28738	0.534008
289	864	354.524	381.442	1191.88	121.398	373.7	48.7854						3.01221	1.30455	0.104616	1.76554	0.671	0.705257	1.26053	0.421006
290	867	328.656	426.089	1220.32	94.9928	348.231	29.364						2.71946	1.5743	0.130969	1.16401	0.557115	0.0263963	1.02871	0.416636
291	870	317.135	403.64	1189.7	128.946	325.501	30.1877						2.58907	1.43867	0.102594	1.9375	0.455477	0.0551881	1.09642	0.429543
292	873	377.613	402.762	1210.79	93.957	349.715	31.3142						3.27351	1.43336	0.122137	1.14042	0.563751	0.094564	1.10462	0.486192
293	876	353.227	441.868	1291.92	85	352.39	25.0728						2.99753	1.66963	0.197331	0.93637	0.57571	-0.123599	1.04216	0.466143
294	879	349.39	396.637	1194.45	87.5376	369.612	36.2261						2.9541	1.39636	0.106998	0.994179	0.652721	0.266256	1.06177	0.424624
295	882	348.957	440.191	1242.28	91.0394	357.6	37.0651						2.9492	1.6595	0.151322	1.07395	0.599006	0.295582	1.12143	0.429286
296	885	334.887	404.861	1198.25	109.559	317.437	33.5364						2.78996	1.44605	0.110515	1.49585	0.419418	0.172239	1.07234	0.425474
297	888	344.991	415.703	1183.87	89.7061	357.195	23.4598						2.90432	1.51155	0.0971859	1.04358	0.597196	-0.179981	0.995641	0.456785
298	891	334.356	453.413	1192.93	99.2151	351.338	36.4789						2.78396	1.73938	0.105583	1.2602	0.571008	0.275092	1.12254	0.416985
299	894	350.899	415.099	1168.5	118.262	347.758	27.0038						2.97118	1.5079	0.0829457	1.6941	0.554999	-0.0561027	1.12584	0.472039
300	897	337.613	441.571	1204.57	81.4767	321.827	34.5172						2.82083	1.66783	0.116374	0.856106	0.439046	0.206522	1.01778	0.42838

## Sheet: C
				6.25	12.5	25	50	100	200	400	800
		ST	w/hugin	0	0	0	0.1	0.2	0.7	0.9	1						Bonferroni's multiple comparisons test	95% confidence interval	P value	F (DFn, DFd)		Row 1	95% confidence interval		P value	F (DFn, DFd)
				0	0	0	0	0.2	0.5	0.7	1						glut1i/hugin vs. + /hugin	0.04678 to 0.1032	<0.0001	F (14, 72) = 4.800		glut1i/hugin vs. w/hugin	-0.07980 to 0.07980	ns	>0.9999	F (14, 72) = 4.800
				0	0	0	0	0.1	0.5	0.9	1						glut1i/hugin vs. glut1i/ +	0.04678 to 0.1032	<0.0001			glut1i/hugin vs. glut1i/w1118	-0.07980 to 0.07980	ns	>0.9999
				0	0	0	0.1	0.1	0.6	0.8	1											Row 2
																						glut1i/hugin vs. w/hugin	-0.07980 to 0.07980	ns	>0.9999
			mean	0	0	0	0.05	0.15	0.575	0.825	1											glut1i/hugin vs. glut1i/w1118	-0.07980 to 0.07980	ns	>0.9999
			SEM	0	0	0	0.0288675	0.0288675	0.0478714	0.0478714	0											Row 3
																						glut1i/hugin vs. w/hugin	-0.07980 to 0.07980	ns	>0.9999
			glut1i/hugin	0	0	0	0.2	0.3	0.8	1	1											glut1i/hugin vs. glut1i/w1118	-0.07980 to 0.07980	ns	>0.9999
				0	0	0	0.1	0.4	0.8	1	1											Row 4
				0	0	0	0.2	0.4	0.7	1	1											glut1i/hugin vs. w/hugin	-0.004805 to 0.1548	ns	0.0696
				0	0	0	0	0.3	0.7	0.9	1											glut1i/hugin vs. glut1i/w1118	-0.02980 to 0.1298	ns	0.3116
																						Row 5
			mean	0	0	0	0.125	0.35	0.75	0.975	1											glut1i/hugin vs. w/hugin	0.1202 to 0.2798	****	<0.0001
			SEM	0	0	0	0.0478714	0.0288675	0.0288675	0.025	0											glut1i/hugin vs. glut1i/w1118	0.09520 to 0.2548	****	<0.0001
																						Row 6
			glut1i/w1118	0	0	0	0.1	0.2	0.6	0.7	1											glut1i/hugin vs. w/hugin	0.09520 to 0.2548	****	<0.0001
				0	0	0	0.1	0.2	0.6	0.8	1											glut1i/hugin vs. glut1i/w1118	0.07020 to 0.2298	***	0.0001
				0	0	0	0.1	0.2	0.7	0.8	1											Row 7
				0	0	0	0	0.1	0.5	0.7	1											glut1i/hugin vs. w/hugin	0.07020 to 0.2298	***	0.0001
																						glut1i/hugin vs. glut1i/w1118	0.1452 to 0.3048	****	<0.0001
			mean	0	0	0	0.075	0.175	0.6	0.75	1											Row 8
			SEM	0	0	0	0.025	0.025	0.0408248	0.0288675	0											glut1i/hugin vs. w/hugin	-0.07980 to 0.07980	ns	>0.9999
																						glut1i/hugin vs. glut1i/w1118	-0.07980 to 0.07980	ns	>0.9999
		fed	w/hugin	0	0	0	0	0	0	0.5	0.9
				0	0	0	0	0	0.1	0.6	0.9
				0	0	0	0	0	0.1	0.5	0.9
				0	0	0	0	0	0.1	0.4	1						Bonferroni's multiple comparisons test	95% confidence interval	P value	F (DFn, DFd)		Row 1	95% confidence interval		P value		F (DFn, DFd)
																	glut1i/hugin vs. +/hugin	0.02865 to 0.08385	<0.0001	F (14, 72) = 5.610		glut1i/hugin vs. w/hugin	-0.07808 to 0.07808	No	ns	>0.9999	F (14, 72) = 5.610
			mean	0	0	0	0	0	0.075	0.5	0.925						glut1i/hugin vs. glut1i/+	0.03802 to 0.09323	<0.0001			glut1i/hugin vs. glut1i/w1118	-0.07808 to 0.07808	No	ns	>0.9999
			SEM	0	0	0	0	0	0.025	0.0408248	0.025											Row 2
																						glut1i/hugin vs. w/hugin	-0.07808 to 0.07808	No	ns	>0.9999
			glut1i/hugin	0	0	0	0	0	0.2	0.6	1											glut1i/hugin vs. glut1i/w1118	-0.07808 to 0.07808	No	ns	>0.9999
				0	0	0	0	0.1	0.3	0.7	0.9											Row 3
				0	0	0	0	0	0.4	0.6	0.9											glut1i/hugin vs. w/hugin	-0.07808 to 0.07808	No	ns	>0.9999
				0	0	0	0	0.1	0.3	0.7	1											glut1i/hugin vs. glut1i/w1118	-0.07808 to 0.07808	No	ns	>0.9999
																						Row 4
			mean	0	0	0	0	0.05	0.3	0.65	0.95											glut1i/hugin vs. w/hugin	-0.07808 to 0.07808	No	ns	>0.9999
			SEM	0	0	0	0	0.0288675	0.0408248	0.0288675	0.0288675											glut1i/hugin vs. glut1i/w1118	-0.07808 to 0.07808	No	ns	>0.9999
																						Row 5
			glut1i/w1118	0	0	0	0	0.1	0.2	0.3	0.7											glut1i/hugin vs. w/hugin	-0.02808 to 0.1281	No	ns	0.294
				0	0	0	0	0	0.2	0.5	0.7											glut1i/hugin vs. glut1i/w1118	-0.05308 to 0.1031	No	ns	0.9319
				0	0	0	0	0	0.1	0.5	0.9											Row 6
				0	0	0	0	0	0.2	0.4	0.9											glut1i/hugin vs. w/hugin	0.1469 to 0.3031	Yes	****	<0.0001
																						glut1i/hugin vs. glut1i/w1118	0.04692 to 0.2031	Yes	***	0.0009
			mean	0	0	0	0	0.025	0.175	0.425	0.8											Row 7
			SEM	0	0	0	0	0.025	0.025	0.0478714	0.057735											glut1i/hugin vs. w/hugin	0.07192 to 0.2281	Yes	****	<0.0001
																						glut1i/hugin vs. glut1i/w1118	0.1469 to 0.3031	Yes	****	<0.0001
																						Row 8
																						glut1i/hugin vs. w/hugin	-0.05308 to 0.1031	No	ns	0.9319
																						glut1i/hugin vs. glut1i/w1118	0.07192 to 0.2281	Yes	****	<0.0001

## Sheet: E
		50mM G004-1.tif	50mM G005-1.tif	50mM G007-1.tif	50mM G008-1.tif	50mM G009-1.tif	50mM G010-1.tif						50mM G004-1.tif	50mM G005-1.tif	50mM G007-1.tif	50mM G008-1.tif	50mM G009-1.tif	50mM G010-1.tif						50mM glucose+alloxan.nd2	50mM glucose+alloxan003.nd2	50mM glucose+alloxan004.nd2	50mM glucose+alloxan005.nd2	50mM glucose+alloxan006.nd2	50mM glucose+alloxan007.nd2			50mM glucose+alloxan.nd2	50mM glucose+alloxan003.nd2	50mM glucose+alloxan004.nd2	50mM glucose+alloxan005.nd2	50mM glucose+alloxan006.nd2	50mM glucose+alloxan007.nd2						Peak
	time（sec）	Mean1	Mean1	Mean1	Mean1	Mean1	Mean1						F/F0	F/F0	F/F0	F/F0	F/F0	F/F0	mean	SEM				raw data	raw data	raw data	raw data	raw data	raw data			F/F0	F/F0	F/F0	F/F0	F/F0	F/F0	mean	SEM				50mM glucose	50glucose+alloxan
1	0	93.5092	134.38	1136.65	53.9821	218.259	29.0766						0.0582588	-0.188121	0.0534297	0.229757	-0.024055	0.0163504	0.0242699	0.0552987				948.38	760.703	573.682	1024.03	803.389	756.915			0.0277874	0.0204067	-0.00949338	0.0635763	0.00999752	0.00522545	0.0195833	0.0102418				4.38912	0.361951
2	3	76.3006	160.686	1088.44	38.7993	220.343	35.272						-0.136494	-0.0291827	0.00875073	-0.11612	-0.0147386	0.232906	-0.0091464	0.0538526				942.393	784.523	575.96	996.87	825.351	745.589			0.0212996	0.0523586	-0.00556162	0.0353698	0.037607	-0.00981691	0.0218761	0.010192				4.24516	0.83259
3	6	88.4693	158	1038.3	28.0968	216.899	24.1533						0.00122139	-0.0454137	-0.0377214	-0.359932	-0.0301349	-0.15574	-0.10462	0.0555363				937.511	779.63	576.882	974.263	810.604	746.29			0.0160091	0.0457944	-0.00396955	0.0118897	0.0190675	-0.00888514	0.0133177	0.00793494				0.28525	0.262692
4	9	77.181	158.908	1122.46	47.3548	220.24	24.4943						-0.12653	-0.0399303	0.0402774	0.0787814	-0.0151983	-0.14382	-0.0344034	0.0361694				932.951	773.669	563.801	985.953	794.257	759.024			0.011067	0.0377981	-0.0265549	0.0240319	-0.00148247	0.00802618	0.00881431	0.00900803				4.13483	-0.0366667
5	12	78.2147	160.644	1065.52	34.7168	218.694	29.5862						-0.114832	-0.0294419	-0.0124969	-0.209123	-0.0221112	0.0341631	-0.0589735	0.0359306				913.978	761.998	547.963	989.298	800.896	740.871			-0.00949483	0.0221432	-0.0539004	0.0275055	0.00686389	-0.0160823	-0.00382749	0.0121931				1.26705	0.635239
6	15	83.8589	162.099	1064.55	35.8566	231.111	41.1379						-0.0509553	-0.0206489	-0.0133953	-0.183157	0.0334136	0.437944	0.0338669	0.0861739				910.998	760.51	584.847	989.368	774.821	750.613			-0.0127243	0.0201468	0.00978402	0.0275782	-0.0259174	-0.00314449	0.00262047	0.00829554				2.1262	0.2822
7	18	84.2945	173.812	1087.36	43.1183	227.079	33.0805						-0.0460255	0.0501168	0.00774341	-0.0177296	0.0153841	0.156304	0.0276322	0.0289198				929.087	738.302	563.53	991.49	793.152	753.659			0.00687958	-0.00964222	-0.0270228	0.0297828	-0.00287177	0.000901298	-0.000328855	0.00767237			Mean	2.74127	0.389668
8	21	82.3988	160.241	1064.83	58.2581	241.364	31.4291						-0.0674794	-0.0318749	-0.0131376	0.327168	0.0792585	0.0985803	0.0654191	0.0586239				939.301	693.492	593.112	985.23	804.126	738.585			0.0179491	-0.0697504	0.0240537	0.0232803	0.0109237	-0.0191186	-0.00211038	0.0150177			SEM	0.71886	0.124725
9	24	78.9601	165.436	1108.14	32.7634	220.471	25.5824						-0.106396	-0.000490182	0.0270044	-0.253623	-0.014164	-0.105787	-0.0755758	0.0422276				946.837	723.998	588.42	985.914	792.399	728.645			0.0261158	-0.02883	0.0159533	0.0239915	-0.00381829	-0.0323189	0.000182225	0.0106493
10	27	77.1963	146.363	1134.16	47.0143	213.116	32.6705						-0.126357	-0.115721	0.0511168	0.0710245	-0.0470541	0.141972	-0.00416969	0.0444525				908.02	741.738	560.006	951.506	805.633	760.139			-0.0159513	-0.00503318	-0.0331062	-0.0117459	0.0128187	0.00950683	-0.00725182	0.00695924
11	30	98.3589	171.257	1127.33	46.0143	231.831	28.249						0.113144	0.0346833	0.0447945	0.0482437	0.0366308	-0.0125777	0.044153	0.0164737				913.183	751.531	587.05	934.117	789.525	718.528			-0.0103561	0.00810274	0.0135868	-0.0298065	-0.00743178	-0.0457547	-0.0119433	0.0091993
12	33	91.3037	143.271	1075.8	43.7061	206.632	26.751						0.0332988	-0.134404	-0.00297103	-0.00433899	-0.0760469	-0.0649392	-0.0415669	0.0250561				932.159	732	568.473	946.35	803.856	732.204			0.0102083	-0.0180961	-0.0184868	-0.0171007	0.0105852	-0.0275931	-0.0100805	0.00665731
13	36	75.5552	157.346	1073.47	34.4337	224.604	15.8544						-0.14493	-0.049362	-0.0051309	-0.215572	0.00431578	-0.445822	-0.14275	0.0698686				931.505	730.252	577.349	952.831	803.348	761.008			0.0094995	-0.0204409	-0.00316272	-0.0103699	0.00994559	0.0106609	-0.000644582	0.00527789			P value	0.0091
14	39	102.046	161.696	1030.33	44.3871	237.428	28.6092						0.154871	-0.0230813	-0.0451075	0.0111748	0.0616601	1.28166e-05	0.0265883	0.0295735				926.022	734.971	600.972	986.553	804.651	756.425			0.00355827	-0.014111	0.0376244	0.0246544	0.0115839	0.00457483	0.0113141	0.00735362			95% confidence interval	-3.977 to -0.7260
15	42	81.1994	168.492	1065.98	57.3441	221.195	29.3985						-0.0810532	0.0179738	-0.0120696	0.306346	-0.0109276	0.0276022	0.0413119	0.0552351				905.585	730.109	570.386	947.128	787.858	756.286			-0.0185905	-0.0206334	-0.0151842	-0.0162924	-0.00952761	0.0043901	-0.0126397	0.00373643			F, DFn, Dfd	33.22, 5, 5
16	45	82.4969	190.558	1064.87	46.2903	246.814	30.2069						-0.0663692	0.15129	-0.0130972	0.0545312	0.103627	0.0558592	0.0476402	0.0319792				903.324	718.833	580.489	913.648	789.358	761.024			-0.0210409	-0.0357579	0.00225908	-0.051066	-0.00764185	0.0106823	-0.0170942	0.00958023
17	48	80.2301	191.68	1056.91	25.5484	228.293	20.7471						-0.092023	0.15807	-0.0204752	-0.417986	0.0208134	-0.274801	-0.1044	0.085467				915.12	740.169	584.723	959.064	778.505	764.49			-0.00825634	-0.00713877	0.00956872	-0.00389564	-0.0212866	0.0152849	-0.00262061	0.00538952
18	51	111.647	154.185	1068.27	31.7348	206.493	30.8544						0.263529	-0.068464	-0.00994211	-0.277055	-0.0766693	0.0784921	-0.0150182	0.0734119				899.647	728.45	582.71	934.77	783.535	775.879			-0.0250251	-0.0228586	0.00609415	-0.0291277	-0.0149617	0.0304103	-0.00924479	0.00943429
19	54	109.104	176.436	1048.27	65.5484	232.602	35.4483						0.234751	0.0659684	-0.0284778	0.493247	0.0400779	0.239068	0.174106	0.0775556				894.926	764.287	602.078	912.128	781.598	770.089			-0.0301414	0.0252134	0.0395338	-0.0526442	-0.0173979	0.0227205	-0.00211931	0.0149114
20	57	87.3712	185.72	1088.65	51.2975	209.364	25.2759						-0.011206	0.122059	0.00894007	0.168599	-0.0638294	-0.1165	0.0180104	0.0444334				923.853	760.645	601.181	895.792	781.87	783.349			0.00120701	0.0203286	0.0379847	-0.0696117	-0.0170558	0.0403306	0.00219725	0.0169232
21	60	115.893	194.644	1048.75	55.5627	223.582	22.908						0.311575	0.175975	-0.0280345	0.265764	-0.000251852	-0.199268	0.0876267	0.0802289				915.998	760.074	597.601	901.549	799.14	811.488			-0.00730569	0.0195619	0.0318046	-0.0636326	0.00465642	0.0777009	0.0104643	0.0190602
22	63	99.1963	195.261	1075.97	44.0824	232.503	25.4751						0.122621	0.179704	-0.00280588	0.00423344	0.0396375	-0.109537	0.0389753	0.0415572				893.172	759.684	595.003	927.512	784.037	787.702			-0.0320427	0.0190393	0.0273186	-0.0366667	-0.0143313	0.0461114	0.00157143	0.0139006
23	66	108.641	183.069	1074.07	38.7634	218.287	36.4368						0.229509	0.106047	-0.00456677	-0.116938	-0.0239307	0.273621	0.0772902	0.062507				835.692	764.112	629.128	757.173	781.784	800.984			-0.0943354	0.0249794	0.0862374	-0.213584	-0.0171637	0.063751	-0.0250192	0.0458916
24	69	97.5798	209.185	1067.1	39.9247	252.345	28.6092						0.104326	0.263829	-0.011034	-0.0904824	0.128359	1.28166e-05	0.0658351	0.0514033				788.826	749.593	660.202	815.053	678.104	804.954			-0.145126	0.00550311	0.13989	-0.153469	-0.147508	0.069023	-0.0386143	0.0522143
25	72	95.1779	181.931	988.796	39.0609	210.567	30.4713						0.0771437	0.099168	-0.0836011	-0.11016	-0.0584479	0.0651011	-0.00179945	0.0376585				850.21	717.795	632.093	810.724	646.38	796.371			-0.078602	-0.0371512	0.0913579	-0.157965	-0.187389	0.0576248	-0.0520209	0.0458462
26	75	84.8896	177.066	919.591	48.1936	212.587	30.6245						-0.0392907	0.069777	-0.147739	0.09789	-0.0494191	0.0704561	0.000279126	0.0388276				858.806	715.653	692.645	835.269	640.965	802.829			-0.0692863	-0.0400238	0.195905	-0.132472	-0.194198	0.0662009	-0.0289792	0.0575577
27	78	93.4509	203.432	981.448	49.8208	201.595	38.6284						0.057599	0.229074	-0.090411	0.134959	-0.0985671	0.350226	0.0971467	0.0725557				752.855	673.673	658.312	800.77	674.808	827.361			-0.184108	-0.0963366	0.136625	-0.168303	-0.151651	0.0987811	-0.0608321	0.057943
28	81	97.7055	196.416	953.517	45.6344	204.493	29.8123						0.105749	0.186682	-0.116296	0.0395893	-0.0856123	0.0420663	0.0286964	0.0466489				700.882	691.599	702.635	823.018	680.333	822.307			-0.240433	-0.0722902	0.213154	-0.145197	-0.144705	0.0920686	-0.0495671	0.0693363
29	84	96.6933	159.053	882	40.0287	188.893	19.4981						0.0942937	-0.0390531	-0.182578	-0.0881132	-0.155366	-0.318459	-0.114879	0.0571216				836.748	750.985	647.333	770.333	697.173	827.581			-0.0931913	0.00736966	0.117671	-0.199916	-0.123534	0.0990729	-0.032088	0.0521057
30	87	96.9295	197.073	917.183	60.1864	211.777	18.0115						0.0969668	0.190651	-0.149971	0.371096	-0.0530383	-0.370422	0.0142137	0.107202				798.795	835.87	686.159	793.535	667.679	840.097			-0.134322	0.121235	0.184706	-0.175818	-0.160613	0.115695	-0.00818612	0.0674657
31	90	95.908	193.515	883.583	43.4194	191.991	20.9579						0.0854064	0.169156	-0.181111	-0.0108703	-0.141511	-0.267433	-0.0577271	0.0684052				785.913	827.891	671.639	754.148	703.087	842.341			-0.148282	0.110533	0.159636	-0.216726	-0.116099	0.118675	-0.0153773	0.0665339
32	93	93.4295	300.561	802.622	35.0645	210.178	16.8314						0.0573568	0.815896	-0.256144	-0.201202	-0.0601909	-0.411671	-0.00932592	0.17773				827.531	933.366	631.321	751.113	729.472	838.611			-0.10318	0.252016	0.0900241	-0.219878	-0.0829289	0.113722	0.00829592	0.0707121
33	96	94.6043	300.502	773.383	42.0753	219.52	14.613						0.0706522	0.815536	-0.283242	-0.04149	-0.0184155	-0.489214	0.00897113	0.181771				785.645	886.186	682.748	745.986	745.081	865.796			-0.148573	0.188729	0.178816	-0.225203	-0.0633051	0.149826	0.0133817	0.0743337
34	99	106.009	299.023	750.904	59.4373	224.216	23.7778						0.199723	0.806603	-0.304075	0.354031	0.00258263	-0.168865	0.148333	0.163789				835.732	991.279	703.078	728.049	752.319	876.48			-0.0942919	0.329701	0.213918	-0.243833	-0.0542056	0.164014	0.0525503	0.088709
35	102	108.663	310.96	739.244	57.4552	228.148	30.3218						0.229752	0.878725	-0.314882	0.308877	0.0201623	0.0598754	0.197085	0.16232				732.779	987.265	693.835	718.272	780.978	888.692			-0.205865	0.324317	0.197959	-0.253987	-0.0181772	0.180232	0.037413	0.0958601
36	105	121.89	324.274	741.161	45.5591	210.428	21.4253						0.379444	0.959161	-0.313105	0.0378739	-0.0590704	-0.251095	0.125535	0.194544				761.632	1048.18	725.302	661.319	802.126	877.911			-0.174597	0.406028	0.25229	-0.31314	0.00840933	0.165915	0.0574842	0.110276
37	108	89.8067	365.429	715.296	51.7204	202.917	26.8276						0.016357	1.20781	-0.337076	0.178233	-0.0926594	-0.0622617	0.151733	0.222019				767.676	1070.83	689.604	696.669	795.518	882.403			-0.168046	0.436415	0.190655	-0.276425	0.00010207	0.17188	0.0590969	0.106465
38	111	118.451	386.346	658.657	48.3369	212.97	23.4943						0.340528	1.33418	-0.389568	0.101154	-0.0477052	-0.178775	0.193303	0.249536				717.096	1095.34	655.249	726.284	832.737	873.714			-0.222861	0.469286	0.131338	-0.245666	0.0468926	0.16034	0.056555	0.108967
39	114	126.347	390.858	665.9	54.3082	210.64	18.1724						0.429885	1.36144	-0.382855	0.237186	-0.0581224	-0.364798	0.203789	0.26636				793.98	1100.56	676.025	717.409	851.679	902.919			-0.13954	0.47629	0.167209	-0.254884	0.0707063	0.199127	0.0864846	0.106305
40	117	137.344	392.224	695.413	39.6272	205.253	22.1686						0.55434	1.3697	-0.355503	-0.0972597	-0.0822131	-0.225113	0.193991	0.267759				782.737	1111.66	686.648	737.844	877.716	889.716			-0.151725	0.491181	0.18555	-0.233659	0.103439	0.181592	0.096063	0.10671
41	120	150.261	403.924	493.935	38.1936	205.403	27.3065						0.700525	1.44038	-0.54223	-0.129918	-0.0815428	-0.0455221	0.223616	0.293543				779.252	1121.66	731.327	733.44	888.772	914.071			-0.155501	0.5046	0.262692	-0.238234	0.117339	0.213936	0.117472	0.112739
42	123	144.009	448.142	640.717	54.5233	194.379	38.1149						0.629775	1.70753	-0.406194	0.242086	-0.130835	0.332277	0.395774	0.301308				810.75	1173.33	679.237	711.455	896.999	927.804			-0.121366	0.573897	0.172755	-0.261067	0.127681	0.232176	0.120679	0.119012
43	126	164.896	456.168	676.383	39.5412	215.137	36.5785						0.866151	1.75603	-0.37314	-0.0992188	-0.0380154	0.278574	0.398396	0.321955				805.252	1212.41	707.514	745.037	903.744	885.496			-0.127324	0.626321	0.221577	-0.226189	0.136161	0.175988	0.134422	0.122453
44	129	139.282	499.198	675	42.3692	226.617	26.59						0.576279	2.016	-0.374422	-0.0347947	0.013316	-0.0705668	0.354302	0.355421				817.214	1171.81	656.411	715.506	957.308	913.204			-0.11436	0.57187	0.133344	-0.25686	0.2035	0.212785	0.125046	0.117862
45	132	204.715	508.129	719.165	56.2401	217.124	37.1916						1.31679	2.06995	-0.33349	0.281196	-0.0291297	0.300004	0.600887	0.371187				791.112	1212.55	683.118	732.121	966.784	895.2			-0.142649	0.626519	0.179456	-0.239604	0.215413	0.188875	0.138002	0.125206
46	135	197.491	502.974	663.891	48.7276	225.475	42.1149						1.23504	2.03881	-0.384717	0.110055	0.00821269	0.472094	0.579915	0.367301				793.509	1201	665.539	750.307	956.197	917.438			-0.14005	0.611017	0.149104	-0.220715	0.202103	0.218408	0.136644	0.121164
47	138	189.739	524.927	630.835	42.2294	229.398	37.1954						1.14731	2.17145	-0.415353	-0.0379794	0.0257539	0.300137	0.531886	0.391527				783.339	1234.1	679.299	779.99	976.019	908.04			-0.151072	0.655419	0.172862	-0.189886	0.227023	0.205928	0.153379	0.125317
48	141	238.009	471.71	627.404	42.8996	247.6	32.8429						1.69359	1.84992	-0.418532	-0.0227117	0.107141	0.147999	0.559568	0.392463				776.641	1210.46	634.346	784.889	971.009	900.827			-0.158331	0.623709	0.0952468	-0.184798	0.220724	0.196348	0.13215	0.121078
49	144	240.696	504.713	671.009	52.724	251.409	26.1648						1.724	2.04932	-0.378121	0.201096	0.124175	-0.0854293	0.605839	0.415361				804.214	1258.39	633.872	825.105	968.485	921.349			-0.128449	0.687997	0.0944293	-0.143029	0.217552	0.223602	0.158684	0.12456
50	147	251.23	461.429	654.73	44.767	251.565	31.5479						1.84321	1.78781	-0.393207	0.0198292	0.124874	0.102733	0.580875	0.397926				797.159	1216.33	657.729	813.397	990.425	922.897			-0.136095	0.631585	0.13562	-0.155189	0.245133	0.225659	0.157785	0.118537
51	150	258.362	460.98	625.717	56.5161	254.248	29.9387						1.92392	1.7851	-0.420096	0.287483	0.136871	0.0464845	0.626627	0.400504				860.792	1238.4	673.645	816.815	983.45	938.282			-0.0671333	0.661182	0.1631	-0.151638	0.236365	0.246091	0.181328	0.116964
52	153	253.485	493.36	618.417	67.5448	263.184	36.0843						1.86873	1.98072	-0.426861	0.538726	0.176827	0.261299	0.73324	0.398394				854.112	1211.13	678.38	830.237	972.581	904.665			-0.0743735	0.624608	0.171275	-0.137698	0.222701	0.201446	0.167993	0.110274
53	156	278.414	480.076	596.665	49.5448	250.608	57.2107						2.15086	1.90047	-0.447021	0.128671	0.120593	0.999756	0.808888	0.42983				825.06	1246.6	616.639	861.617	964.572	918.222			-0.105857	0.672181	0.064674	-0.105107	0.212633	0.219449	0.159662	0.118136
54	159	300.163	500.439	630.148	53.3799	213.46	44.1188						2.39699	2.02349	-0.41599	0.216038	-0.0455123	0.542139	0.786193	0.470716				854.513	1211.14	661.928	838.582	1016.83	936.784			-0.0739381	0.624618	0.14287	-0.129031	0.278325	0.244101	0.181158	0.111478
55	162	274.807	493.541	638.587	49.2222	265.91	46.1341						2.11003	1.98182	-0.408169	0.121322	0.189016	0.612582	0.767768	0.425651				823.288	1236.28	634.187	841.757	988.845	937.331			-0.107778	0.658341	0.0949725	-0.125734	0.243147	0.244827	0.167963	0.118272
56	165	299.948	522.498	574.874	56.1577	248.445	40.3487						2.39456	2.15677	-0.467217	0.279319	0.110923	0.410358	0.814119	0.479091				878.056	1266.51	662.028	846.045	982.658	963.669			-0.0484245	0.6989	0.143042	-0.12128	0.23537	0.279806	0.197902	0.118978
57	168	281.046	455.106	697.27	52.1936	247.702	44.931						2.18064	1.7496	-0.353783	0.189013	0.107601	0.570529	0.740601	0.4092				878.911	1208.47	623.542	848.597	994.809	918.956			-0.047498	0.621047	0.0765934	-0.118629	0.250645	0.220424	0.167097	0.108286
58	171	310.561	516.149	608.052	51.6487	221.745	43.3448						2.51467	2.11841	-0.436468	0.1766	-0.00846689	0.515085	0.813305	0.494284				859.893	1248.44	674.349	857.163	978.235	937.268			-0.0681082	0.674653	0.164315	-0.109732	0.229809	0.244744	0.18928	0.114976
59	174	330.528	498.294	659.074	65.8172	271.229	40.2682						2.74063	2.01053	-0.389182	0.49937	0.2128	0.407544	0.913617	0.488445				907.009	1278.1	634.149	847.673	995.212	965.472			-0.0170471	0.71444	0.0949079	-0.119589	0.251151	0.2822	0.201011	0.12032
60	177	330.503	519.353	631.991	72.6595	237.604	49.5632						2.74036	2.13777	-0.414281	0.655243	0.0624453	0.732444	0.985663	0.496379				913.728	1310.85	620.813	861.506	989.8	957.423			-0.00976576	0.758379	0.0718816	-0.105222	0.244348	0.271511	0.205189	0.12547
61	180	329.408	498.462	603.157	62.7204	235.782	34.3372						2.72796	2.01155	-0.441005	0.428822	0.0542968	0.200231	0.83031	0.50902				833.853	1320.72	647.016	840.169	990.666	956.117			-0.0963287	0.771619	0.117122	-0.127382	0.245436	0.269776	0.196707	0.133601
62	183	374.61	529.677	614.535	49.4803	256.27	47.5977						3.23953	2.20014	-0.43046	0.127202	0.14591	0.663741	0.99101	0.580398				866.529	1316.06	632.838	843.323	980.783	964.879			-0.0609164	0.765356	0.0926435	-0.124107	0.233012	0.281413	0.1979	0.130635
63	186	371.377	508.485	599.244	57.1792	229.225	38.9502						3.20294	2.07211	-0.444631	0.302589	0.0249781	0.361475	0.919909	0.574328				952.694	1279.45	688.826	870.231	983.212	957.708			0.0324634	0.716255	0.18931	-0.0961592	0.236065	0.271889	0.224971	0.113305
64	189	381.092	518.323	639.139	56.8495	250.261	52.5594						3.31288	2.13155	-0.407657	0.295079	0.119042	0.837174	1.04801	0.574369				992.087	1321.78	622.935	862.663	994	962.851			0.0751546	0.773027	0.0755445	-0.104019	0.249628	0.278719	0.224676	0.123406
65	192	376.531	543.383	614.913	62.7348	211.739	49.8774						3.26126	2.28295	-0.430109	0.42915	-0.0532105	0.743427	1.03891	0.585842				1008.56	1252.01	650.879	873.827	980.732	917.732			0.0930023	0.679442	0.123792	-0.092425	0.232948	0.218799	0.20926	0.105445
66	195	375.644	469.611	586.804	77.4444	259.066	54.5594						3.25123	1.83724	-0.45616	0.764247	0.158415	0.907082	1.07701	0.53623				1033.73	1278.33	621.71	878.656	970.303	938.216			0.120289	0.71475	0.0734307	-0.0874097	0.219837	0.246002	0.214483	0.111235
67	198	406.862	523.489	613.774	54.172	249	43.1762						3.60452	2.16275	-0.431165	0.234083	0.113403	0.509191	1.03213	0.626928				1007.41	1288.88	594.71	859.117	951.988	960.575			0.0917638	0.728907	0.0268131	-0.107703	0.196812	0.275696	0.202048	0.118582
68	201	419.322	488.789	619.487	81.129	248.957	57.4866						3.74554	1.95311	-0.42587	0.848186	0.113212	1.0094	1.20726	0.60639				1101.89	1286.08	602.047	897.488	946.981	922.758			0.194154	0.725148	0.0394801	-0.0678497	0.190517	0.225474	0.217821	0.111379
69	204	389.988	638.317	610.939	73.9857	247.595	42.318						3.41355	2.85651	-0.433792	0.685455	0.107122	0.479193	1.18467	0.640063				1050.51	1318.55	599.308	895.837	911.376	928.113			0.138468	0.768705	0.034752	-0.0695653	0.145755	0.232585	0.20845	0.119828
70	207	384.39	695.815	653.744	70.2975	239.786	56.2874						3.3502	3.2039	-0.394122	0.601435	0.0722021	0.967483	1.30018	0.653305				1149.4	1273.68	626.38	875.187	898.433	889.058			0.245634	0.708518	0.0814934	-0.0910125	0.129485	0.180719	0.209139	0.110189
71	210	447.411	562.591	640.987	73.0143	244.15	46.659						4.06342	2.399	-0.405944	0.663326	0.0917157	0.63093	1.24041	0.684256				1140.93	1318.31	650.165	879.156	902.041	909.901			0.236456	0.76838	0.12256	-0.0868904	0.13402	0.208399	0.230488	0.117123
72	213	421.663	633.904	680.691	60.4982	260.056	57.4713						3.77202	2.82985	-0.369147	0.378199	0.162838	1.00887	1.29711	0.669949				1123.38	1293.94	644.202	884.49	904.123	921.647			0.217438	0.735695	0.112265	-0.0813497	0.136637	0.223999	0.224114	0.111838
73	216	437.295	644.112	706.487	53	268.612	33.3755						3.94893	2.89152	-0.34524	0.207384	0.2011	0.166615	1.17839	0.726953				1093.01	1333.08	584.897	906.446	916.967	921.835			0.184532	0.788188	0.00987	-0.0585465	0.152785	0.224248	0.216846	0.122517
74	219	476.19	604.416	655.991	81.4337	252.319	35.4828						4.38912	2.65169	-0.392039	0.855127	0.128244	0.240274	1.31207	0.751128				1104.4	1344.65	613.819	863.599	873.976	920.498			0.196873	0.803713	0.0598062	-0.103048	0.0987378	0.222472	0.213093	0.12724
75	222	402.451	678.172	645.457	63.638	268.563	37.6935						3.5546	3.0973	-0.401802	0.449726	0.20088	0.317548	1.20304	0.684336				1089.57	1366.18	648.156	865.518	876.982	906.264			0.180801	0.83259	0.119091	-0.101055	0.102517	0.203569	0.222919	0.129626
76	225	439.276	695.937	667.722	75.4588	252.231	40.9004						3.97136	3.20463	-0.381167	0.719014	0.127852	0.429642	1.34522	0.731365				1070.7	1330.26	597.523	860.669	865.788	925.877			0.160348	0.784406	0.0316701	-0.106091	0.0884444	0.229616	0.198066	0.126284
77	228	370.012	643.099	699.356	74.5878	229.97	41.1647						3.18749	2.8854	-0.351848	0.699172	0.0283103	0.438881	1.1479	0.616053				1118.2	1345.37	633.664	835.442	850.441	925.889			0.21183	0.804675	0.0940689	-0.132293	0.0691498	0.229632	0.212844	0.129669
78	231	413.377	672.228	749.948	84.2222	246.73	37.7816						3.67826	3.06139	-0.304961	0.918651	0.103253	0.320627	1.2962	0.679981				1082.23	1333.9	622.056	863.704	839.247	933.51			0.172845	0.789286	0.0740277	-0.102938	0.0550773	0.239753	0.204675	0.126239
79	234	446.028	714.234	720.217	79.681	245.893	46.6284						4.04777	3.31518	-0.332515	0.815199	0.0995095	0.62986	1.42917	0.737145				1118.8	1340.66	578.776	852.662	827.132	894.472			0.212474	0.798361	-0.000699238	-0.114408	0.0398462	0.187908	0.187247	0.131927
80	237	445.561	657.587	760.887	79.8495	256.471	41.7318						4.04249	2.97294	-0.294823	0.819037	0.14681	0.458703	1.35753	0.709754				1078.14	1190.43	634.542	845.243	813.7	913.498			0.168411	0.596842	0.0955857	-0.122113	0.0229598	0.213176	0.162477	0.0993661
81	240	416.528	698.637	674.3	73.3262	270.75	31.3295						3.71391	3.22094	-0.37507	0.670431	0.210656	0.0950988	1.256	0.715217				1073.76	1244.09	575.411	833.784	820.399	927.952			0.16367	0.668817	-0.00650831	-0.134014	0.0313825	0.232371	0.159286	0.114725
82	243	430.595	703.696	702.426	90.1004	276.341	38.3908						3.87311	3.25151	-0.349004	1.05256	0.235656	0.341921	1.40096	0.71179				1092.23	1313.36	575.651	797.854	809.368	935.557			0.18368	0.761745	-0.0060941	-0.171332	0.0175145	0.242471	0.171331	0.132459
83	246	454.632	700.894	725.083	116.133	269.839	34.5785						4.14514	3.23458	-0.328006	1.6456	0.206586	0.208665	1.51876	0.746251				1068.61	1293.59	618.125	778.659	789.392	911.141			0.158084	0.735224	0.0672397	-0.191268	-0.00759911	0.210046	0.161954	0.128251
84	249	390.313	726.224	781.657	101.179	242.31	42.2452						3.41723	3.38762	-0.275574	1.30495	0.0834908	0.476649	1.39906	0.668885				1091.61	1305.61	613.86	803.481	817.556	915.925			0.183008	0.75135	0.0598762	-0.165488	0.0278081	0.2164	0.178825	0.127112
85	252	421.236	705.224	706.761	86.6272	290.531	42.4866						3.7672	3.26074	-0.344986	0.973439	0.299109	0.485087	1.40677	0.691416				1132.16	1310.55	576.405	800.101	799.331	907.256			0.226954	0.757976	-0.00479243	-0.168998	0.00489642	0.204886	0.170154	0.132024
86	255	428.11	745.845	707.77	101.81	270.822	55.0766						3.84499	3.50616	-0.344051	1.31932	0.210981	0.925161	1.57709	0.705058				1119.67	1334.91	613.551	789.642	823.118	906.504			0.21342	0.790648	0.0593437	-0.179861	0.0348006	0.203888	0.18704	0.134092
87	258	358.383	612.132	773.7	100.194	273.649	42.6284						3.05588	2.69831	-0.282948	1.28249	0.22362	0.490043	1.24457	0.557991				1161.18	1328.28	607.782	796.975	812.315	879.121			0.258404	0.781754	0.0493822	-0.172245	0.0212192	0.167521	0.184339	0.133497
88	261	388.641	724.043	759.139	102.531	267.668	32.8889						3.39831	3.37444	-0.296443	1.33573	0.196877	0.149606	1.35975	0.677618				1169.46	1319.56	615.386	769.422	827.044	870.974			0.267374	0.770059	0.0625118	-0.200862	0.0397364	0.156701	0.182587	0.133521
89	264	427.684	747.31	779.017	118.423	284.173	46.2299						3.84017	3.51501	-0.27802	1.69777	0.270681	0.615931	1.61026	0.706093				1156.08	1321.59	586.882	831.944	812.572	906.361			0.252882	0.772781	0.0132962	-0.135926	0.0215427	0.203697	0.188045	0.130331
90	267	389.509	771.076	846.783	107.247	278.632	53.5939						3.40814	3.6586	-0.215216	1.44318	0.245901	0.873334	1.56899	0.662889				1185.1	1321.5	567.639	826.239	811.703	894.905			0.284334	0.772661	-0.0199283	-0.14185	0.0204491	0.188484	0.184025	0.133057
91	270	421.595	779.871	807.435	122.383	294.313	47.977						3.77126	3.71174	-0.251683	1.788	0.316018	0.677	1.66872	0.709697				1201.78	1295.03	564.66	811.049	807.885	872.438			0.302407	0.737145	-0.0250702	-0.157628	0.0156493	0.158645	0.171858	0.130193
92	273	420.549	744.172	899.809	142.717	308.704	43.0766						3.75942	3.49605	-0.166073	2.25121	0.380371	0.50571	1.70445	0.693318				1205.7	1262.27	598.816	838.942	822.865	897.845			0.306654	0.693204	0.0339022	-0.128657	0.0344827	0.192388	0.188662	0.117886
93	276	391.169	727.452	867.339	133.502	304.773	49.4291						3.42692	3.39504	-0.196165	2.04128	0.362792	0.727757	1.62627	0.639481				1217.36	1266.7	547.237	857.638	814.549	876.72			0.319289	0.699154	-0.0551536	-0.109239	0.0240273	0.164332	0.173735	0.122776
94	279	404.181	721.766	866.43	150.62	275.576	46.1034						3.57418	3.36068	-0.197007	2.43125	0.232237	0.611509	1.66881	0.676685				1233.83	1252.23	582.589	866.564	813.083	895.619			0.337139	0.679746	0.00588437	-0.0999681	0.0221843	0.189432	0.18907	0.116567
95	282	342.613	734.564	865.352	167.735	290.253	56.2797						2.87741	3.43801	-0.198006	2.82114	0.297864	0.967214	1.7006	0.626347				1218.4	1229.66	563.265	823.09	814.351	869.139			0.320416	0.649466	-0.02748	-0.145122	0.0237781	0.154265	0.162554	0.117205
96	285	390.899	767.149	1020.69	143.688	300.06	39.8621						3.42387	3.63487	-0.0540448	2.27334	0.341718	0.393349	1.66885	0.674963				1208.96	1213.84	573.745	812.056	808.411	862.363			0.310191	0.628245	-0.00938582	-0.156581	0.0163114	0.145266	0.155674	0.114233
97	288	382.276	739.69	981.274	167.179	288.3	48.4904						3.32628	3.46897	-0.0905722	2.80848	0.289132	0.694945	1.74954	0.663197				1217.4	1177.78	540.751	836.101	804.333	831.314			0.31933	0.579877	-0.0663522	-0.131608	0.011184	0.104032	0.136077	0.109514
98	291	409.135	747.927	926.226	179.265	285.338	64.8506						3.63025	3.51874	-0.14159	3.08381	0.27589	1.2668	1.93898	0.68831				1248.42	1152.7	553.72	818.103	812.879	850.522			0.35295	0.54623	-0.0439605	-0.150301	0.0219277	0.129541	0.142731	0.106848
99	294	420.101	751.726	1018.59	183.778	289.717	54.9042						3.75435	3.54169	-0.0559911	3.18661	0.29547	0.919135	1.94021	0.710445				1256.73	1125.83	577.667	801.465	805.26	828.534			0.361951	0.510184	-0.00261401	-0.167582	0.0123502	0.100339	0.135772	0.103119
100	297	350.426	707.043	1073.11	161.419	299.128	70.6552						2.96583	3.27173	-0.00545731	2.67727	0.337552	1.4697	1.7861	0.57158				1250.52	1082.24	572.386	820.533	826.824	816.698			0.355229	0.451716	-0.011731	-0.147777	0.0394593	0.0846197	0.128586	0.0934027
101	300	393.795	755.617	1090.41	187.667	309.413	48.8161						3.45664	3.5652	0.0105761	3.2752	0.383541	0.70633	1.89958	0.692378				1232.7	1043.47	555.34	810.01	815.175	777.734			0.33591	0.399711	-0.0411636	-0.158707	0.024814	0.0328737	0.0989063	0.0899052
102	303	369.883	784.386	1102.26	163.871	309.833	67.272						3.18603	3.73901	0.0215565	2.73312	0.385417	1.35144	1.90276	0.628578				1215.81	1038.6	569.196	800.576	842.132	812.202			0.317613	0.39318	-0.0172388	-0.168505	0.0587037	0.0786487	0.1104	0.0857636
103	306	352.089	768.518	1053.04	175.097	297.636	67.9962						2.98465	3.64314	-0.0240574	2.98885	0.330879	1.37676	1.88337	0.628142				1216.21	995.907	526.72	797.08	860.123	771.52			0.318041	0.335908	-0.0905781	-0.172136	0.0813216	0.0246214	0.082863	0.0852137
104	309	363.905	700.29	1159	225.401	283.773	64.8084						3.11837	3.23093	0.0741413	4.13483	0.26889	1.26533	2.01542	0.696837				1182.69	967.471	578.642	799.385	891.527	777.748			0.281712	0.297764	-0.000930599	-0.169742	0.120802	0.0328924	0.0937496	0.0729792
105	312	332.736	734.505	1110.29	205.495	330.051	53.2184						2.76563	3.43765	0.0289989	3.68134	0.475824	0.860209	1.87494	0.65557				1237.8	933.407	539.527	774.955	924.528	781.262			0.341443	0.252071	-0.068466	-0.195115	0.16229	0.0375593	0.088297	0.082432
106	315	353.739	660.977	1146.54	165	325.499	65.1264						3.00332	2.99341	0.0625928	2.75884	0.455468	1.27644	1.75835	0.544109				1213.51	914.851	563.723	795.185	952.374	774.476			0.315119	0.22718	-0.0266894	-0.174104	0.197298	0.0285468	0.0945582	0.0748395
107	318	348.04	730.716	1194.05	174.025	339.754	61.8008						2.93882	3.41476	0.106623	2.96444	0.519208	1.1602	1.85067	0.582013				1214.66	883.591	541.71	760.087	988.83	744.784			0.316362	0.185248	-0.0646955	-0.210557	0.243128	-0.0108852	0.0764334	0.0830861
108	321	344.963	638.792	1243.5	159.004	343.298	56.908						2.904	2.85938	0.152454	2.62223	0.535054	0.989176	1.67705	0.513109				1193.43	845.692	550.336	768.021	1028.98	755.919			0.293355	0.13441	-0.0498019	-0.202317	0.293605	0.00390284	0.0788589	0.0809201
109	324	359.969	615.832	1251.26	145.068	364.617	60.1456						3.07383	2.72066	0.159643	2.30477	0.630383	1.10234	1.66527	0.488591				1199.52	843.147	528.941	776.09	1117.4	758.107			0.299951	0.130997	-0.086743	-0.193937	0.404766	0.00680796	0.0936403	0.0937261
110	327	301.816	620.396	1282.2	176.179	397.73	58.4291						2.4157	2.74824	0.188321	3.01351	0.77845	1.04234	1.69776	0.479696				1149.74	837.295	511.592	800.786	1221.83	756.807			0.246009	0.123146	-0.116697	-0.168287	0.536047	0.00508095	0.104217	0.106432
111	330	326.534	616.703	1360.02	126.993	402.139	62.9923						2.69544	2.72592	0.260445	1.893	0.798164	1.20185	1.5958	0.414299				1138.74	792.969	541.389	826.913	1272.42	768.321			0.234088	0.0636876	-0.0652496	-0.141151	0.59965	0.0203723	0.118566	0.109344
112	333	342.138	584.957	1323.25	152.237	443.385	44.41						2.87203	2.53413	0.226363	2.46808	0.982597	0.552318	1.60592	0.469386				1133.44	793.641	528.991	794.862	1282.71	744.98			0.22834	0.0645897	-0.0866569	-0.17444	0.612586	-0.0106254	0.105632	0.115856
113	336	340.534	593.792	1367.33	133.763	466.366	71.5019						2.85388	2.5875	0.267218	2.04724	1.08536	1.49929	1.72341	0.396119				1102.66	769.268	536.383	779.936	1281.22	764.603			0.194984	0.0318945	-0.0738931	-0.189942	0.610715	0.0154349	0.0981989	0.114881
114	339	308.279	501.551	1360.28	105.201	475.54	71.567						2.48884	2.03021	0.260683	1.39656	1.12637	1.50157	1.46737	0.312983				1098.14	767.593	496.984	772.502	1275.55	759.829			0.190083	0.0296483	-0.141918	-0.197663	0.603581	0.00909447	0.0821377	0.118341
115	342	291.877	840.254	1334.33	168.745	477.122	68.2912						2.30322	4.07655	0.23663	2.84416	1.13345	1.38707	1.99685	0.55835				1132.96	772.63	517.997	785.718	1265.62	731.579			0.22782	0.0364046	-0.105639	-0.183937	0.591105	-0.0284231	0.0895552	0.115515
116	345	321.209	835.495	1266.92	117.803	478.362	82.1724						2.63517	4.0478	0.174161	1.68365	1.13899	1.87227	1.92534	0.540212				1097.91	747.618	543.202	770.753	1300.73	734.639			0.189836	0.00285411	-0.0621191	-0.19948	0.635239	-0.0243586	0.0903287	0.120397
117	348	294.328	868.162	1361.71	108.968	491.236	66.5862						2.33096	4.24516	0.262008	1.48237	1.19656	1.32747	1.80742	0.557199				1105.7	739.665	507.592	774.078	1246.51	749.367			0.198277	-0.0078147	-0.123604	-0.196026	0.567081	-0.00479925	0.0721855	0.113051
118	351	312.368	842.356	1353.4	114.244	507	83.1264						2.53512	4.08925	0.254308	1.60257	1.26705	1.90562	1.94232	0.528611				1056.79	738.527	489.975	766.08	1266.69	716.96			0.145278	-0.00934054	-0.15402	-0.204333	0.592444	-0.0478378	0.0536982	0.118693
119	354	329.77	781.274	1291.51	112.441	506.67	73.6552						2.73206	3.72021	0.196952	1.5615	1.26557	1.57456	1.84181	0.500284				1074.54	746.316	508.757	745.716	1253.2	702.147			0.164507	0.00110721	-0.121592	-0.225484	0.575488	-0.0675096	0.0544195	0.117
120	357	365.258	810.026	1273.26	122.541	496.017	74.1111						3.13368	3.89392	0.180036	1.79159	1.21794	1.5905	1.96794	0.547754				1054.32	722.915	523.667	766.36	1253.02	702.425			0.1426	-0.0302831	-0.0958492	-0.204042	0.575265	-0.0671402	0.0534251	0.114074
121	360	306.985	780.838	1197.35	131.129	488.505	66.705						2.47419	3.71758	0.109681	1.98723	1.18435	1.33162	1.80078	0.504059				1043.79	704	537.589	773.737	1229.01	693.417			0.131189	-0.0556553	-0.0718116	-0.19638	0.545073	-0.0791033	0.045552	0.108772
122	363	305.736	744.419	1153.65	100.491	466.936	81.3678						2.46007	3.49755	0.069181	1.28927	1.0879	1.84415	1.70802	0.484156				1028.54	700.264	506.53	776.399	1223.33	682.28			0.11466	-0.0606674	-0.125438	-0.193616	0.537933	-0.0938941	0.0298297	0.109985
123	366	321.224	826.178	1212.78	99.8638	426.413	63.8008						2.63534	3.99151	0.123982	1.27498	0.906706	1.23011	1.69377	0.56687				978.06	730.355	487.707	781.455	1246.95	642.637			0.0599533	-0.0203031	-0.157936	-0.188364	0.567633	-0.146542	0.0190735	0.116323
124	369	272.764	818.634	1293.11	101.968	382.94	52.2912						2.08691	3.94593	0.198431	1.32291	0.712315	0.827799	1.51572	0.551461				998.23	718.975	502.81	744.566	1257.5	632.643			0.0818118	-0.0355681	-0.13186	-0.226678	0.580898	-0.159815	0.0181316	0.120794
125	372	302.325	793.746	1328.05	107.613	432.493	65.8046						2.42146	3.79556	0.230816	1.45151	0.933889	1.30015	1.6889	0.512452				990.199	710.368	473.966	755.543	1233.46	629.075			0.0731082	-0.047113	-0.181662	-0.215277	0.550669	-0.164554	0.00252845	0.117924
126	375	265.88	759.531	1386.79	88.0072	418.839	60.9847						2.00901	3.58885	0.28525	1.00488	0.872839	1.13167	1.48208	0.478547				967.784	744.645	520.751	771.848	1219.01	617.825			0.0488161	-0.00113373	-0.100884	-0.198342	0.532501	-0.179495	0.0169105	0.110448
127	378	298.344	802.175	1357.55	111.341	415.702	49.6513						2.3764	3.84649	0.258152	1.53643	0.858812	0.735523	1.60197	0.540085				988.938	736.609	499.009	776.484	1238	608.538			0.0717414	-0.0119143	-0.138422	-0.193527	0.556382	-0.191827	0.0154054	0.116453
128	381	328.549	787.34	1330.26	85.7419	421.887	55.9004						2.71824	3.75686	0.232859	0.953271	0.886464	0.953956	1.58361	0.551203				953.232	778.566	495.801	779.475	1234.46	581.472			0.0330464	0.0443673	-0.143962	-0.190421	0.551924	-0.227773	0.0111969	0.117728
129	384	287.276	774.805	1367.75	120.039	453.747	89.4368						2.25115	3.68113	0.267609	1.7346	1.02893	2.1262	1.84827	0.475453				959.589	801.577	474.112	787.093	1202.9	615.24			0.0399358	0.0752351	-0.181409	-0.182508	0.51225	-0.182927	0.0134295	0.110793
130	387	304.607	754.307	1304.52	97.8889	422.754	69.7548						2.44729	3.55728	0.209008	1.22999	0.890343	1.43823	1.62869	0.48804				962.542	828.874	476.832	783.082	1191.89	607.919			0.0431362	0.111851	-0.176713	-0.186675	0.498405	-0.192649	0.0162257	0.11021
131	390	304.531	755.158	1367.76	90.4229	401.146	60.2222						2.44642	3.56243	0.267617	1.05991	0.793722	1.10502	1.53919	0.500247				947.509	905.44	488.932	806.749	1210.79	582.627			0.0268439	0.214556	-0.155822	-0.162093	0.522168	-0.226239	0.0365689	0.11735
132	393	299.377	742.139	1310.55	96.3979	389.829	45.8353						2.3881	3.48377	0.214597	1.19602	0.743118	0.602138	1.43796	0.510707				1000.03	999.184	497.738	842.249	1211.43	587.425			0.0837616	0.340304	-0.140617	-0.125222	0.522972	-0.219867	0.0768887	0.121744
133	396	308.607	699.845	1339.14	81.6416	383.068	66.0536						2.49256	3.22824	0.241095	0.859863	0.71289	1.30885	1.47392	0.469702				938.792	1164.41	490.632	826.539	1212.04	566.014			0.0173976	0.561937	-0.152885	-0.141539	0.523736	-0.248302	0.0933906	0.146413
134	399	301.617	727.521	1075.47	84.0681	388.113	69.9502						2.41344	3.39546	-0.00327733	0.915141	0.735449	1.44506	1.48354	0.503818				963.567	1293.18	526.028	799.59	1158.31	563.363			0.0442466	0.734665	-0.0917722	-0.169529	0.456189	-0.251823	0.120329	0.159531
135	402	283.969	668.581	1148.26	88.362	358.812	67.6398						2.21373	3.03936	0.0641885	1.01296	0.604425	1.3643	1.38316	0.444085				954.203	1292.09	487.019	807.027	1185.77	554.307			0.0340987	0.733204	-0.159125	-0.161804	0.490719	-0.26385	0.112207	0.165844
136	405	286.469	678.053	1159.39	117.018	354.064	44.4444						2.24202	3.09658	0.074504	1.66576	0.583197	0.55352	1.36926	0.47585				943.792	1331.11	516.452	812.446	1175.21	536.573			0.0228163	0.78555	-0.108306	-0.156177	0.477438	-0.287402	0.12232	0.170734
137	408	311.617	671.838	1095.43	90.5484	359.325	53.6935						2.52662	3.05904	0.0152221	1.06277	0.606723	0.876815	1.35786	0.481157				935.406	1320.88	474.003	796.934	1181.34	547.522			0.0137279	0.771827	-0.181597	-0.172288	0.485153	-0.27286	0.107327	0.173135
138	411	303.5	681.762	1104.08	87.8208	388.717	31.4291						2.43476	3.11899	0.0232448	1.00063	0.738148	0.0985803	1.23573	0.518023				946.183	1293.85	462.134	814.551	1166.29	526.345			0.025407	0.735565	-0.20209	-0.153991	0.466226	-0.300985	0.095022	0.169316
139	414	299.905	699.696	1099.82	84.1255	349.281	32.3487						2.39407	3.22735	0.0192919	0.916448	0.561807	0.130724	1.20828	0.534186				953.857	1262.8	463.872	808.519	1158.84	526.532			0.0337237	0.693924	-0.199089	-0.160255	0.456859	-0.300736	0.0874045	0.163433
140	417	290.344	695.865	1123.57	88.7455	337.302	35.7471						2.28587	3.2042	0.041309	1.0217	0.508245	0.249513	1.21847	0.514787				958.808	1280.16	519.212	802.813	1143.74	494.155			0.0390891	0.717204	-0.103541	-0.166181	0.437878	-0.343735	0.0967858	0.164107
141	420	291.819	645.838	975.53	109.796	328.737	35.1992						2.30256	2.90195	-0.0958951	1.50124	0.469945	0.230361	1.21836	0.495094				943.966	1255.79	487.146	786.383	1167.14	537.026			0.0230049	0.684514	-0.158904	-0.183246	0.467297	-0.286799	0.0909777	0.161129
142	423	278.702	696.924	883.774	97.7348	360.848	28.8927						2.15412	3.2106	-0.180934	1.22648	0.613531	0.00992234	1.17229	0.535915				922.239	1260.18	479.012	775.473	1134.4	531.171			-0.000542022	0.690402	-0.172948	-0.194578	0.42614	-0.294575	0.0756498	0.161086
143	426	311.362	696.442	901.939	83.5627	336.405	37.4291						2.52373	3.20769	-0.164098	0.903627	0.504233	0.308306	1.21391	0.548018				943.051	1188.91	505.134	750.85	1135.01	516.833			0.0220131	0.594801	-0.127847	-0.220151	0.426899	-0.313618	0.0636827	0.150039
144	429	333.524	692.597	833.017	96.871	353.154	32.023						2.77455	3.18446	-0.227974	1.2068	0.579128	0.11934	1.27272	0.576715				910.373	1212.43	505.115	767.706	1134.91	504.647			-0.0134017	0.626352	-0.12788	-0.202644	0.426781	-0.329801	0.0632346	0.154578
145	432	266.564	753.584	777.117	95.405	331.959	37.3218						2.01675	3.55292	-0.279781	1.1734	0.484355	0.304555	1.2087	0.568838				929.042	1165.07	521.829	771.286	1100.75	549.903			0.00683124	0.562821	-0.0990226	-0.198926	0.383828	-0.269698	0.0643054	0.136802
146	435	310.555	790.571	796.543	96.1183	358.197	27.7586						2.5146	3.77638	-0.261777	1.18965	0.601677	-0.0297193	1.29847	0.640699				926.603	1149.77	496.006	743.553	1100.09	524.292			0.00418727	0.542299	-0.143607	-0.227731	0.383002	-0.303711	0.0424066	0.140799
147	438	280.295	813.753	797.552	78.6774	341.647	30.977						2.17214	3.91644	-0.260842	0.792336	0.527672	0.0827775	1.20509	0.640947				940.645	1127.09	495.012	763.763	1120.73	514.54			0.0194054	0.511881	-0.145323	-0.20674	0.408947	-0.316662	0.0452514	0.139222
148	441	314.73	767.67	711.561	83.6738	359.615	23.3295						2.56185	3.63802	-0.340538	0.906158	0.608016	-0.184535	1.19816	0.646156				936.696	1142.88	458.243	735.115	1089.55	527.26			0.0151261	0.53306	-0.208808	-0.236494	0.369749	-0.299769	0.0288106	0.142069
149	444	305.319	707.954	732.017	103.398	324.274	35.9387						2.45534	3.27723	-0.321579	1.35549	0.449991	0.25621	1.24545	0.567774				894.54	1123.77	471.206	716.111	1095.92	498.74			-0.0305598	0.507428	-0.186427	-0.256232	0.377757	-0.337646	0.0123867	0.143133
150	447	367.874	646.201	683.356	81.8136	356.026	32.1647						3.16329	2.90414	-0.366677	0.863781	0.591968	0.124293	1.21347	0.60144				921.263	1065.2	507.171	721.726	1077.5	493.318			-0.00159909	0.42886	-0.12433	-0.2504	0.354604	-0.344846	0.0103815	0.129884
151	450	300.801	602.254	762.974	91.5771	326.775	35.4981						2.40421	2.63863	-0.292889	1.0862	0.461174	0.240809	1.08969	0.488342				888.359	1062.94	487.86	738.01	1056.37	508.206			-0.0372581	0.425821	-0.157673	-0.233488	0.328034	-0.325075	6.03423e-05	0.125879
152	453	347.485	639.941	677.417	90.914	345.711	16.1379						2.93254	2.86632	-0.372181	1.0711	0.545845	-0.435912	1.10128	0.614067				907.188	1063.67	520.473	734.216	1028.85	515.317			-0.0168536	0.426804	-0.101362	-0.237428	0.293439	-0.315631	0.00816136	0.120336
153	456	355.003	596.129	749.97	104.961	347.334	36.9004						3.01763	2.60162	-0.304941	1.39109	0.553103	0.289825	1.25805	0.54149				893.833	1013.94	484.025	757.833	1061.12	482.276			-0.0313267	0.360103	-0.164294	-0.212899	0.334011	-0.35951	-0.0123193	0.121501
154	459	339.181	602.858	642	84.8136	338.762	33.9579						2.83857	2.64228	-0.405005	0.932124	0.514775	0.186973	1.11829	0.543708				897.864	1008.81	520.14	727.687	1033.65	500.093			-0.0269579	0.353214	-0.101938	-0.244209	0.299472	-0.335849	-0.00937796	0.115104
155	462	324.945	577.759	703.004	95.595	336.814	34.4789						2.67745	2.49064	-0.348468	1.17773	0.506062	0.205184	1.1181	0.505893				878.438	984.388	503.863	727.593	1036.12	459.659			-0.0480108	0.320456	-0.130042	-0.244306	0.302584	-0.389547	-0.0314776	0.118174
156	465	333.543	589.01	726.609	91.9176	345.893	19.3946						2.77476	2.55861	-0.326592	1.09396	0.546659	-0.322077	1.05422	0.556282				856.491	965.519	499.028	733.292	985.715	463.506			-0.0717948	0.295147	-0.13839	-0.238388	0.239212	-0.384438	-0.0497754	0.1093
157	468	335.396	539.911	720.991	72.9498	344.484	19.4444						2.79573	2.26197	-0.331798	0.661857	0.540359	-0.320336	0.93463	0.536475				888.909	946.223	498.215	697.914	957.953	457.415			-0.0366631	0.269262	-0.139793	-0.275131	0.20431	-0.392527	-0.0617571	0.106774
158	471	317.822	537.888	706.861	55.3011	361.101	19.6207						2.59684	2.24975	-0.344894	0.259805	0.61466	-0.314173	0.843665	0.522727				871.263	928.056	493.953	760.253	1008.63	466.196			-0.0557856	0.244893	-0.147152	-0.210385	0.268026	-0.380866	-0.0468782	0.105311
159	474	348.853	556.511	715.361	67.0323	351.608	25.023						2.94802	2.36227	-0.337016	0.527051	0.572215	-0.12534	0.9912	0.551083				843.558	911.38	445.928	748.769	975.978	481.165			-0.0858108	0.222524	-0.23007	-0.222313	0.226971	-0.360986	-0.0749476	0.101219
160	477	324.718	520.993	744.822	56.7383	361.507	35.6858						2.67488	2.14768	-0.309712	0.292545	0.61648	0.24737	0.944874	0.484202				803.458	894.853	513.28	745.35	975.139	461.157			-0.129269	0.200354	-0.113782	-0.225864	0.225917	-0.387558	-0.0717001	0.0985235
161	480	365.012	526.36	791.122	62.2939	333.514	24.4598						3.1309	2.1801	-0.266802	0.419106	0.491307	-0.145026	0.968265	0.560934				817.297	894.58	523.087	731.422	943.556	460.849			-0.114271	0.199988	-0.0968497	-0.240329	0.186212	-0.387967	-0.0755363	0.0950702
162	483	323.227	534.713	759.017	51.9785	340.422	18.7969						2.65801	2.23057	-0.296556	0.184113	0.522195	-0.342969	0.825894	0.531037				787.391	857.419	512.947	748.673	947.828	446.683			-0.146681	0.15014	-0.114358	-0.222412	0.191583	-0.40678	-0.0914179	0.0928498
163	486	323.163	531.554	803.748	58.2151	348.955	20.751						2.65728	2.21148	-0.2551	0.326188	0.560351	-0.274665	0.870924	0.515159				807.815	863.31	487.819	758.041	961.83	475.688			-0.124547	0.158043	-0.157742	-0.212683	0.209185	-0.368261	-0.0826675	0.0911001
164	489	348.117	502.36	787.078	53.1398	364.814	14.4981						2.93969	2.0351	-0.270549	0.210568	0.631264	-0.49323	0.842141	0.556403				790.062	845.149	497.701	757.611	914.435	429.442			-0.143785	0.133682	-0.140681	-0.213129	0.149601	-0.429678	-0.107332	0.0897484
165	492	365.141	469.911	829.565	85.6308	373.739	9.9923						3.13236	1.83905	-0.231173	0.95074	0.671172	-0.650727	0.951905	0.565342				806.935	812.864	472.888	728.533	953.14	441.433			-0.1255	0.0903752	-0.183523	-0.24333	0.198261	-0.413752	-0.112911	0.0914352
166	495	337.939	448.017	841.117	56.405	385.068	18.682						2.82451	1.70677	-0.220467	0.284952	0.721833	-0.346985	0.828436	0.501475				760.424	801.184	473.492	730.136	907.259	416.433			-0.175905	0.0747073	-0.182479	-0.241665	0.14058	-0.446953	-0.138619	0.088027
167	498	314.015	446.779	796.822	74.6129	371.764	23.5287						2.55376	1.6993	-0.261519	0.699743	0.662344	-0.177572	0.862676	0.446181				785.228	780.527	509.595	726.638	903.586	411.373			-0.149025	0.0469982	-0.120145	-0.245298	0.135962	-0.453674	-0.130864	0.0857472
168	501	329.476	475.531	820.848	88.1004	345.268	23.5211						2.72873	1.87301	-0.239252	1.007	0.543864	-0.177838	0.955919	0.478544				781.509	765.986	488.1	743.508	887.232	419.762			-0.153055	0.0274933	-0.157258	-0.227777	0.115403	-0.442533	-0.139621	0.0802045
169	504	316.546	483.353	780.722	74.8351	378.542	22.4483						2.5824	1.92027	-0.276441	0.704805	0.692648	-0.215337	0.901391	0.468348				750.672	749.161	487.878	743.325	881.166	396.385			-0.186474	0.00492336	-0.15764	-0.227967	0.107776	-0.473579	-0.155493	0.0821461
170	507	335.255	454.046	867.052	81.9713	350.799	23.3908						2.79413	1.7432	-0.196431	0.867374	0.568596	-0.182392	0.932413	0.475291				753.984	732.496	500.72	771.078	887.757	388.643			-0.182884	-0.0174307	-0.135469	-0.199142	0.116063	-0.48386	-0.150454	0.0823677
171	510	326.644	437.135	842.387	72.7491	378.383	22.8199						2.69669	1.64103	-0.21929	0.657285	0.69194	-0.202348	0.877551	0.459868				750.02	724.13	475.505	790.854	860.886	382.575			-0.187181	-0.0286532	-0.179005	-0.178602	0.0822812	-0.49192	-0.163847	0.0790527
172	513	356.095	423.842	898.139	72.0896	360.64	27.4674						3.02999	1.56072	-0.16762	0.642261	0.612602	-0.0398979	0.939675	0.487722				760.301	714.42	501.097	773.769	877.624	356.01			-0.176039	-0.0416772	-0.134818	-0.196348	0.103324	-0.527199	-0.162126	0.085705
173	516	319.555	453.482	835.909	81.2366	363.265	17.4138						2.61646	1.73979	-0.225294	0.850637	0.624341	-0.391314	0.869104	0.471097				764.433	714.657	514.134	803.177	860.019	379.071			-0.171561	-0.04136	-0.112308	-0.165803	0.0811914	-0.496573	-0.151069	0.0790556
174	519	314.589	402.538	817.735	76.4695	360.735	14.6628						2.56025	1.43201	-0.242137	0.742038	0.613023	-0.487473	0.769619	0.457324				749.982	725.514	481.175	819.648	857.571	376.905			-0.187222	-0.0267971	-0.169215	-0.148696	0.0781136	-0.499449	-0.158878	0.0797105
175	522	318.359	376.68	888.63	81.957	364.118	13.1303						2.60292	1.27578	-0.176433	0.867048	0.628152	-0.54104	0.776071	0.456774				763.167	699.705	497.851	782.294	850.66	347.238			-0.172932	-0.0614161	-0.140423	-0.187493	0.069425	-0.538849	-0.171948	0.0829319
176	525	285.006	422.304	930.691	89.6057	352.358	26.3257						2.22546	1.55143	-0.137451	1.04129	0.575566	-0.0798052	0.862748	0.380106				764.185	680.382	506.685	788.481	845.433	344.647			-0.171829	-0.0873367	-0.125169	-0.181067	0.0628545	-0.542289	-0.17414	0.0819932
177	528	308.129	399.62	908.126	84.2115	341.644	18.4406						2.48714	1.41438	-0.158364	0.918407	0.527663	-0.355423	0.805635	0.430712				771.123	675.744	500.33	791.539	836.005	350.752			-0.164311	-0.0935576	-0.136141	-0.177891	0.0510008	-0.534182	-0.175847	0.0792358
178	531	309.712	373.845	947.052	75.9426	369.437	14.3793						2.50506	1.25865	-0.122288	0.730035	0.651936	-0.497383	0.754335	0.434577				804.23	693.562	495.371	805.889	826.985	349.252			-0.128432	-0.0696568	-0.144704	-0.162987	0.039662	-0.536174	-0.167049	0.0796817
179	534	303.859	374.67	929.087	89.6667	355.666	14.4521						2.43882	1.26364	-0.138938	1.04268	0.59036	-0.494838	0.783621	0.430509				822.274	648.965	548.576	819.206	833.158	371.47			-0.108876	-0.129479	-0.0528408	-0.149155	0.0474226	-0.506668	-0.149933	0.0769719
180	537	306.393	327.214	937.226	89.595	366.373	25.1188						2.46749	0.976927	-0.131395	1.04105	0.638234	-0.121991	0.81172	0.392125				831.534	664.116	476.76	796.121	825.318	352.917			-0.0988421	-0.109155	-0.176837	-0.173132	0.0375661	-0.531306	-0.175284	0.0779488
181	540	314.613	344.333	1047.58	76.1864	365.833	24.7165						2.56053	1.08035	-0.0291225	0.735589	0.635821	-0.136054	0.807853	0.39885				864.226	667.128	514.174	766.053	824.133	361.45			-0.0634128	-0.105115	-0.112238	-0.204362	0.0360764	-0.519975	-0.161504	0.0784442
182	543	300.613	313.152	977.13	81.6272	375.82	15.2146						2.40209	0.891965	-0.0944123	0.859535	0.680479	-0.468185	0.711912	0.406395				891.536	635.837	514.657	746.2	826.126	359.25			-0.0338159	-0.147089	-0.111405	-0.22498	0.0385814	-0.522896	-0.166934	0.0803145
183	546	329.402	301.389	1021.17	96.0574	364.777	18.9808						2.72789	0.8209	-0.0535976	1.18827	0.631101	-0.336541	0.829671	0.443906				916.654	632.979	494.352	767.745	818.612	373.05			-0.00659444	-0.150923	-0.146463	-0.202604	0.0291359	-0.504568	-0.16367	0.0774668
184	549	347.135	304.459	1010.9	92.2366	317.306	32.4368						2.92858	0.839444	-0.0631112	1.10123	0.418834	0.133804	0.89313	0.443666				943.306	638.82	528.527	767.179	806.151	341.853			0.0222889	-0.143088	-0.0874583	-0.203192	0.0134697	-0.546001	-0.15733	0.0855742
185	552	272.077	421.261	1103.89	78.8459	376.278	29.6054						2.07914	1.54512	0.0230635	0.796175	0.682528	0.0348342	0.860143	0.335292				976.694	627.3	503.262	747.595	815.389	333.22			0.0584729	-0.15854	-0.13108	-0.223532	0.0250836	-0.557466	-0.16451	0.0903176
186	555	345.15	487.182	1054.83	88.1111	356.878	23.931						2.90612	1.9434	-0.0224013	1.00724	0.595779	-0.16351	1.04444	0.485591				982.062	602.985	537.595	736.004	795.577	328.161			0.0642907	-0.191157	-0.0718009	-0.235571	0.000176369	-0.564184	-0.166374	0.0919319
187	558	295.187	519.617	1012.87	85.0538	350.561	36.7931						2.34068	2.13936	-0.0612899	0.937596	0.567533	0.286075	1.03499	0.40477				1007.3	609.176	495.916	759.303	814.047	350.952			0.0916453	-0.182852	-0.143763	-0.211371	0.0233969	-0.533917	-0.159477	0.0894794
188	561	344.298	520.644	1039.21	104.079	367.707	23.364						2.89647	2.14556	-0.0368792	1.371	0.644199	-0.183329	1.1395	0.501058				1007.95	574.831	537.199	731.726	785.394	367.071			0.0923491	-0.228922	-0.0724839	-0.240014	-0.0126259	-0.51251	-0.162368	0.0872621
189	564	312.626	498.743	1060.64	83.5663	365.403	28.8123						2.53804	2.01325	-0.0170139	0.903709	0.633897	0.00711202	1.01316	0.430296				1032.11	613.876	510.751	750.41	792.569	363.802			0.118526	-0.176548	-0.118149	-0.220608	-0.00360445	-0.51685	-0.152872	0.0884632
190	567	289.38	484.152	1111.83	105.581	360.91	28.6705						2.27496	1.92509	0.0304212	1.40521	0.613809	0.00215551	1.04194	0.396648				1038.31	592.298	528.115	729.506	779.047	360.696			0.125253	-0.205492	-0.0881685	-0.24232	-0.020604	-0.520976	-0.158718	0.0903881
191	570	310.638	510.766	1055.39	90.276	358.848	35.6437						2.51554	2.08589	-0.0218855	1.05656	0.604588	0.245898	1.0811	0.416694				1021.97	615.44	497.355	738.949	787.108	377.159			0.107538	-0.17445	-0.141278	-0.232512	-0.0104705	-0.499112	-0.158381	0.0846038
192	573	318.156	482.327	1049.95	119.276	342.582	25.4751						2.60063	1.91407	-0.0269263	1.71721	0.531856	-0.109537	1.10455	0.460114				1026.11	595.847	520.769	757.558	816.627	357.639			0.112023	-0.200732	-0.100851	-0.213184	0.0266402	-0.525035	-0.15019	0.0911941
193	576	350.896	448.729	986.539	104.405	368.505	29.9847						2.97114	1.71108	-0.0856925	1.37843	0.647771	0.0480924	1.1118	0.471458				1028.75	570.395	511.187	701.525	782.361	363.986			0.114885	-0.234872	-0.117396	-0.271381	-0.0164383	-0.516607	-0.173635	0.0898241
194	579	325.586	441.439	1051.67	87.8315	343.767	37.4215						2.68471	1.66703	-0.0253348	1.00087	0.537152	0.30804	1.02875	0.409169				1012	567.669	480.268	731.393	781.024	352.006			0.0967398	-0.23853	-0.170781	-0.24036	-0.0181195	-0.532517	-0.183928	0.0883402
195	582	322.252	424.627	1066.8	81.4158	335.229	33.7471						2.64697	1.56546	-0.0113081	0.854719	0.498976	0.179604	0.955738	0.407776				1028.31	578.583	491.72	718.759	786.926	375.028			0.114413	-0.223889	-0.151008	-0.253482	-0.0106993	-0.501942	-0.171101	0.0869252
196	585	319.712	453.719	1125.45	95.6487	353.216	26.1188						2.61823	1.74123	0.0430497	1.17896	0.579406	-0.0870372	1.01231	0.427142				997.21	576.037	536.237	725.159	788.037	352.704			0.0807063	-0.227305	-0.0741459	-0.246834	-0.00930258	-0.53159	-0.168079	0.0890277
197	588	336.034	426.789	1081.11	87.957	372.383	41						2.80295	1.57852	0.00195287	1.00373	0.665111	0.433124	1.0809	0.407253				975.04	564.202	507.539	726.831	771.293	337.363			0.0566804	-0.243181	-0.123695	-0.245098	-0.0303528	-0.551963	-0.189602	0.0871044
198	591	345.476	414.248	1088.6	90.9498	351.518	30.1379						2.9098	1.50275	0.00889577	1.07191	0.571813	0.0534474	1.01977	0.44589				990.868	556.366	501.745	746.909	782.343	343.315			0.0738338	-0.253691	-0.1337	-0.224245	-0.0164607	-0.544059	-0.183054	0.0881649
199	594	339.933	456.66	1041.98	71.7061	379.627	39.8123						2.84707	1.759	-0.0343083	0.633524	0.697503	0.391609	1.04907	0.433553				991.462	555.176	466.9	734.354	788.734	357.71			0.0744772	-0.255287	-0.193861	-0.237284	-0.00842671	-0.524942	-0.190887	0.0859479
200	597	367.951	392.842	1119.32	76.7814	363.91	31.59						3.16416	1.37343	0.0373641	0.749144	0.627223	0.104204	1.00925	0.474466				971.208	556.647	522.798	752.177	775.581	352.177			0.0525269	-0.253314	-0.0973499	-0.218773	-0.0249614	-0.532289	-0.179027	0.0848365
201	600	318.083	394.3	1097.54	90.8531	361.752	34.2261						2.59979	1.38224	0.0171845	1.06971	0.617571	0.196347	0.980474	0.385835				956.527	555.413	488.555	794.652	790.481	331.631			0.0366169	-0.25497	-0.156473	-0.174658	-0.0062303	-0.559576	-0.185882	0.0870233
202	603	344.982	397.393	1154.57	90.2401	381.895	49.2452						2.90421	1.40092	0.0700312	1.05574	0.707643	0.721328	1.14331	0.395584				959.591	551.289	499.801	825.712	769.178	333.423			0.0399382	-0.260502	-0.137056	-0.142398	-0.0330122	-0.557195	-0.181704	0.0860186
203	606	320.69	365.37	1151.88	78.9713	363.443	38.6398						2.6293	1.20745	0.067541	0.799031	0.625136	0.350625	0.946514	0.372047				936.745	573.047	520.196	776.366	744.021	330.193			0.0151793	-0.231316	-0.101841	-0.19365	-0.0646386	-0.561485	-0.189625	0.0827257
204	609	314.764	359.112	1067.07	93.0394	385.48	34.5632						2.56223	1.16964	-0.0110582	1.11951	0.723671	0.20813	0.962022	0.374194				926.005	561.843	480.389	799.144	760.223	337.113			0.00353898	-0.246345	-0.170571	-0.169992	-0.044269	-0.552295	-0.196655	0.0803408
205	612	327.132	393.898	1091.71	90.7097	364.925	43.7701						2.7022	1.37981	0.0117769	1.06644	0.631761	0.529951	1.05366	0.381315				936.23	532.981	509.427	796.416	780.027	354.75			0.0146206	-0.28506	-0.120435	-0.172825	-0.019373	-0.528872	-0.185324	0.0816205
206	615	343.58	361.304	1059.41	83.2796	363.028	44.4023						2.88835	1.18288	-0.0181582	0.897178	0.623278	0.552049	1.02093	0.407696				910.549	541.004	506.449	824.016	755.081	324.786			-0.0132105	-0.274298	-0.125578	-0.14416	-0.0507334	-0.568666	-0.196108	0.0831006
207	618	314.936	304.624	1130.02	82.6631	354.649	50.364						2.56418	0.840441	0.0472847	0.883134	0.585811	0.760435	0.94688	0.346672				907.732	537.789	531.536	819.399	756.678	314.554			-0.0162634	-0.278611	-0.0822626	-0.148955	-0.0487268	-0.582254	-0.192845	0.086622
208	621	350.647	324.429	1114.33	93.2222	386.906	56.4713						2.96833	0.960098	0.0327382	1.12368	0.730048	0.973911	1.13147	0.399861				915.382	533.841	550.804	829.883	773.086	321.645			-0.00797327	-0.283906	-0.048995	-0.138066	-0.0280988	-0.572837	-0.179979	0.0888267
209	624	306.564	277.531	1109.87	79.8387	344.099	46.5862						2.46944	0.676757	0.028608	0.818791	0.538636	0.628385	0.860103	0.340279				928.179	551.298	528.115	825.471	768.277	335.575			0.00589512	-0.260489	-0.0881685	-0.142649	-0.0341448	-0.554338	-0.178982	0.0841151
210	627	305.478	308.356	1094.25	88.7133	388.644	46.4904						2.45715	0.862992	0.0141301	1.02096	0.737823	0.625037	0.953016	0.332191				898.587	534.423	499.72	787.391	749.602	332.433			-0.0261742	-0.283126	-0.137196	-0.182199	-0.0576218	-0.55851	-0.207471	0.0795514
211	630	292.325	307.97	1055.62	81.9355	403.683	44.6207						2.30829	0.86066	-0.0216679	0.866558	0.805068	0.559683	0.896432	0.314122				881.116	551.607	519.271	810.128	755.249	327.193			-0.0451079	-0.260076	-0.103439	-0.158584	-0.0505233	-0.565469	-0.1972	0.0805199
212	633	330.478	270.634	1064.67	104.165	385.989	57.5977						2.74008	0.635084	-0.0132825	1.37296	0.72595	1.01328	1.07901	0.381432				854.716	547.12	497.396	768.881	755.556	317.284			-0.073718	-0.266094	-0.141208	-0.201424	-0.0501365	-0.578629	-0.218535	0.0790636
213	636	316.31	255.142	1085.34	87.3333	384.606	46.9502						2.57973	0.541487	0.00587771	0.989525	0.719765	0.641109	0.912915	0.358515				860.944	546.686	534.984	821.309	760.993	321.752			-0.0669688	-0.266676	-0.0763083	-0.146971	-0.043302	-0.572696	-0.195487	0.0823789
214	639	302.948	273.795	1019.74	103.344	395.068	52.6897						2.42851	0.654186	-0.0549192	1.35426	0.766548	0.841728	0.998386	0.340496				870.846	557.518	542.648	801.947	743.985	328.921			-0.0562379	-0.252147	-0.0630767	-0.16708	-0.0646832	-0.563174	-0.1944	0.0802572
215	642	283.632	220	1034.45	79.6846	382.57	29.3027						2.20991	0.329171	-0.0412915	0.815281	0.710659	0.0242536	0.674663	0.338282				845.788	557.827	536.277	779.372	752.256	328.317			-0.0833941	-0.251731	-0.074076	-0.190528	-0.0542855	-0.563978	-0.202999	0.0787142
216	645	323.908	232.221	1015.14	84.3728	377.979	50.6054						2.66572	0.403007	-0.0591824	0.922082	0.69013	0.768873	0.898438	0.380636				824.065	563.459	550.623	779.084	755.902	327.516			-0.106936	-0.244176	-0.049307	-0.190827	-0.0497014	-0.56504	-0.200998	0.0794236
217	648	294.15	198.571	967.048	92.509	372.799	44.4751						2.32895	0.199703	-0.103757	1.10743	0.666968	0.554593	0.792314	0.350566				873.745	548.463	494.037	769.605	758.88	325.611			-0.0530957	-0.264292	-0.147006	-0.200672	-0.0459577	-0.567571	-0.213099	0.0788101
218	651	302.377	224.99	1037.77	89.0143	396.501	43.3448						2.42205	0.359319	-0.0382131	1.02782	0.772954	0.515085	0.843169	0.348831				847.292	548.238	505.704	777.449	768.682	348.802			-0.0817637	-0.264594	-0.126863	-0.192525	-0.0336353	-0.536771	-0.206025	0.0740341
219	654	297.81	235.786	1025.07	113.179	390.692	50.2031						2.37036	0.424542	-0.0499872	1.57832	0.746977	0.754811	0.970837	0.35426				842.661	538.409	504.168	761.342	764.821	311.79			-0.0867832	-0.277779	-0.129515	-0.209254	-0.0384891	-0.585925	-0.221291	0.0808756
220	657	275.522	208.739	1047.01	97.3405	396.281	45.4368						2.11812	0.261137	-0.0296463	1.2175	0.771967	0.588209	0.821214	0.312697				805.058	557.574	507.196	738.159	735.738	327.609			-0.127534	-0.252071	-0.124287	-0.233332	-0.0750511	-0.564917	-0.229532	0.0726522
221	660	314.997	201.317	1075.17	89.8064	445.867	64.1839						2.56487	0.216293	-0.00355537	1.04586	0.993694	1.2435	1.01011	0.371078				809.638	551.692	534.174	765.13	771.738	315.327			-0.12257	-0.259961	-0.0777068	-0.205319	-0.029793	-0.581229	-0.212763	0.0812205
222	663	309.571	198.64	1088.3	78.1039	404.407	35.2299						2.50346	0.200122	0.00861774	0.779271	0.808304	0.231434	0.755202	0.37415				811.973	544.056	521.202	746.786	762.528	336.147			-0.12004	-0.270204	-0.100104	-0.224372	-0.0413716	-0.553578	-0.218278	0.075293
223	666	309.936	172.522	1148.95	86.2903	375.242	25.9349						2.50759	0.0423206	0.0648252	0.965764	0.677894	-0.0934653	0.694155	0.400162				806.263	541.816	532.393	723.807	758.953	333.889			-0.126228	-0.273209	-0.0807834	-0.248238	-0.0458666	-0.556577	-0.221817	0.0764612
224	669	262.298	190.845	1175.43	95.0107	402.195	37.1877						1.96846	0.153025	0.0893687	1.16442	0.798413	0.299868	0.745593	0.297437				794.596	553.08	535.695	751.969	766.586	321.964			-0.138872	-0.2581	-0.0750819	-0.218989	-0.0362704	-0.572414	-0.216621	0.0789345
225	672	292.902	162.746	1127.2	83.724	399.317	38.1609						2.31482	-0.0167405	0.0446696	0.907302	0.785545	0.333885	0.728246	0.352626				775.625	546.397	512.932	748.409	762.268	319.867			-0.159432	-0.267063	-0.114384	-0.222687	-0.0416989	-0.575199	-0.230077	0.0762438
226	675	299.592	167.033	1071.6	91.6774	372.807	35.9502						2.39053	0.00916081	-0.00685953	1.08849	0.667007	0.256612	0.734156	0.373113				781.02	555.184	556.53	737.858	759.583	306.706			-0.153585	-0.255277	-0.0391088	-0.233645	-0.0450744	-0.592678	-0.219895	0.0832768
227	678	280.478	171.495	1088.2	87.6846	401.071	41.9617						2.17422	0.0361194	0.00852905	0.997528	0.793387	0.466739	0.746087	0.328182				789.944	553.576	481.642	753.833	764.476	322.617			-0.143914	-0.257434	-0.168408	-0.217053	-0.0389224	-0.571547	-0.23288	0.0742159
228	681	301.159	135.432	1151.22	96.5556	427.97	47.9464						2.40827	-0.181761	0.0669285	1.19962	0.913667	0.67593	0.847109	0.376938				757.676	583.139	531.031	770.914	755.885	318.036			-0.178883	-0.217777	-0.083134	-0.199312	-0.0497236	-0.57763	-0.217743	0.0769672
229	684	292.54	181.069	1171.06	112.817	377.852	39.9042						2.31072	0.0939637	0.0853191	1.57007	0.689565	0.394821	0.85741	0.367021				775.226	555.884	506.165	747.695	770.564	319.3			-0.159865	-0.254338	-0.126067	-0.223429	-0.0312696	-0.575951	-0.228487	0.0764894
230	687	303.42	158.762	1119.01	111.606	388.229	48.5249						2.43386	-0.0408076	0.0370821	1.54247	0.735965	0.696151	0.900786	0.385733				737.817	571.738	539.336	756.091	767.052	327.179			-0.200405	-0.233071	-0.0687942	-0.214707	-0.0356846	-0.565488	-0.219692	0.0767636
231	690	305.589	193.911	1242.81	100.237	437.574	53.2644						2.4584	0.171549	0.151818	1.28347	0.956611	0.861817	0.980611	0.347935				785.409	576.471	513.146	741.117	789.228	342.585			-0.148829	-0.226723	-0.114013	-0.23026	-0.00780554	-0.545029	-0.21211	0.0745532
232	693	289.098	162.069	1260.63	100.892	438.979	51.8353						2.27177	-0.0208283	0.168335	1.29841	0.962892	0.811863	0.915408	0.338331				766.971	573.626	538.355	765.29	761.894	320.546			-0.16881	-0.230539	-0.0704883	-0.205154	-0.0421694	-0.574297	-0.215243	0.0779572
233	696	267.865	177.98	1296.42	94	432.433	54.8008						2.03147	0.0753003	0.201501	1.1414	0.933621	0.91552	0.883135	0.289033				751.165	598.202	526.296	726.243	770.255	345.073			-0.18594	-0.197573	-0.0913095	-0.245708	-0.0316582	-0.541724	-0.215652	0.0725146
234	699	292.537	178.508	1377.57	107.85	413.818	46.4406						2.31069	0.078491	0.276708	1.4569	0.850386	0.623296	0.932745	0.338435				772.643	588.992	544.206	758.979	763.781	337.851			-0.162664	-0.209927	-0.0603872	-0.211709	-0.0397964	-0.551315	-0.205966	0.0752763
235	702	277.647	162.865	1349.99	102.194	420.854	46.8697						2.14218	-0.0160228	0.251145	1.32805	0.881849	0.638295	0.870916	0.318857				756.107	589.577	510.209	758.084	779.552	329.677			-0.180584	-0.209141	-0.119085	-0.212638	-0.0199699	-0.56217	-0.217265	0.075046
236	705	265.086	163.624	1424.59	98.4695	406.484	52.249						2.00002	-0.0114365	0.320287	1.24322	0.817592	0.826324	0.866	0.28867				741.159	586.207	511.639	766.626	779.285	320.502			-0.196784	-0.213662	-0.116617	-0.203766	-0.0203047	-0.574356	-0.220915	0.0768054
237	708	239.328	148.155	1465.24	119.806	396.377	51.341						1.70852	-0.104894	0.357962	1.72929	0.772398	0.794586	0.87631	0.298276				735.609	597.715	494.704	768.272	781.069	347.052			-0.202798	-0.198226	-0.145855	-0.202056	-0.0180619	-0.539095	-0.217682	0.0705119
238	711	262.08	170.924	1445.01	126.409	371.163	51.3065						1.966	0.0326696	0.339209	1.87969	0.659654	0.79338	0.9451	0.327609				737.478	607.897	506.072	780.523	783.253	345.929			-0.200773	-0.184567	-0.126228	-0.189332	-0.015317	-0.540587	-0.209467	0.0719639
239	714	270.574	184.314	1485.9	111.788	377.61	45.2682						2.06213	0.113564	0.377103	1.54663	0.688484	0.582315	0.895038	0.305837				737.495	605.83	523.679	763.084	788.36	370.964			-0.200754	-0.187341	-0.0958278	-0.207445	-0.00889714	-0.50734	-0.201267	0.0688081
240	717	285.077	180.475	1451.58	101.254	389.405	42.1149						2.22626	0.090375	0.345302	1.30666	0.741222	0.472094	0.863652	0.320827				728.94	625.306	520.732	744.825	779.47	355.81			-0.210026	-0.161215	-0.100916	-0.226409	-0.0200723	-0.527464	-0.207684	0.0710334
241	720	302.199	170.205	1426.43	122.756	377.957	38.5096						2.42004	0.0283226	0.321987	1.79649	0.690035	0.346074	0.933825	0.389538				755.741	633.924	529.713	733.998	784.592	364.04			-0.180981	-0.149655	-0.0854091	-0.237654	-0.0136339	-0.516534	-0.197311	0.0712573
242	723	316.472	165.168	1473.43	116.767	378.852	51.8736						2.58157	-0.00210512	0.365554	1.66005	0.694037	0.813202	1.01872	0.386012				755.63	631.147	540.648	777.765	781.895	361.938			-0.181102	-0.15338	-0.0665298	-0.192197	-0.0170241	-0.519327	-0.18826	0.0718862
243	726	281.35	184.894	1423.14	132.305	371.595	45.1647						2.18408	0.117074	0.318945	2.01401	0.661587	0.578698	0.979066	0.363458				721.196	623.961	514.368	804.162	785.448	349.839			-0.218418	-0.163019	-0.111905	-0.164781	-0.0125571	-0.535395	-0.201012	0.0726467
244	729	286.463	207.172	1417.97	131.061	397.651	50.5862						2.24195	0.251666	0.31415	1.98568	0.778095	0.768202	1.05662	0.347761				743.614	620.746	521.343	800.198	780.146	352.685			-0.194123	-0.167332	-0.0998617	-0.168897	-0.0192224	-0.531614	-0.196842	0.0718065
245	732	273.245	191.696	1367.89	166.914	365.366	46.2031						2.09236	0.158169	0.267734	2.80244	0.633734	0.614994	1.09491	0.444045				751.37	643.525	527.685	814.934	811.743	346.089			-0.185717	-0.136776	-0.0889106	-0.153593	0.0204994	-0.540375	-0.180812	0.0776664
246	735	307.264	226.267	1448.28	166.398	372.084	50.4981						2.47735	0.367036	0.342243	2.79068	0.66377	0.765123	1.23437	0.449483				716.795	632.471	513.268	820.566	797.482	376.081			-0.223188	-0.151604	-0.113803	-0.147743	0.00257166	-0.500544	-0.189052	0.0692058
247	738	271.341	196.488	1360.13	192.312	364.064	47.7165						2.0708	0.187121	0.260541	3.38102	0.627912	0.667894	1.19922	0.517496				729.241	657.785	557.558	838.323	804.962	382.292			-0.209699	-0.117648	-0.0373339	-0.1293	0.0119744	-0.492295	-0.162384	0.0730785
248	741	282.212	239.62	1401.9	185.34	368.272	50.4176						2.19384	0.447712	0.299261	3.22221	0.646727	0.762309	1.26201	0.480587				734.904	662.099	540.545	832.401	811.522	380.034			-0.203562	-0.111862	-0.0667071	-0.135451	0.0202223	-0.495293	-0.165442	0.0726281
249	744	280.528	248.201	1417.1	244.215	360.101	43.3142						2.17478	0.499554	0.313344	4.56342	0.610189	0.514015	1.44588	0.683015				741.076	655.122	565.704	846.144	800.284	378.496			-0.196874	-0.12122	-0.0232685	-0.121177	0.006094	-0.497336	-0.158964	0.0740367
250	747	315.617	273.987	1375.79	223.785	343.582	35.4789						2.57188	0.655342	0.275056	4.098	0.536328	0.240138	1.39613	0.647139				740.335	629.901	526.368	816.574	815.788	378.065			-0.197677	-0.155051	-0.0911859	-0.151889	0.0255858	-0.497909	-0.178021	0.071396
251	750	269.598	303.449	1441.18	215.05	325.503	45.1839						2.05109	0.833343	0.335663	3.89902	0.455487	0.579369	1.35899	0.56799				704.891	666.732	532.713	835.837	813.123	372.552			-0.236089	-0.105646	-0.0802293	-0.131883	0.0222346	-0.50523	-0.172807	0.0746786
252	753	293.442	299.68	1403.64	262.728	341.764	29.5862						2.32093	0.810572	0.300873	4.98515	0.528199	0.0341631	1.49665	0.770853				739.424	684.849	584.539	818.41	804.71	380.625			-0.198664	-0.0813447	0.00925137	-0.149982	0.0116584	-0.494509	-0.150598	0.0768679
253	756	317.748	343.776	1349.43	263.807	373.904	29.4291						2.59601	1.07698	0.250625	5.00973	0.671909	0.0286718	1.60566	0.775519				735.67	678.649	529.626	814.842	807.439	414.272			-0.202733	-0.0896608	-0.0855596	-0.153687	0.0150894	-0.449824	-0.161062	0.0650646
254	759	295.38	309.964	1376.06	244.147	352.188	37.0038						2.34287	0.872703	0.27531	4.56187	0.57481	0.29344	1.48683	0.690159				742.194	692.955	556.502	819.57	804.793	406.817			-0.195662	-0.0704705	-0.0391572	-0.148777	0.0117625	-0.459725	-0.150338	0.0689912
255	762	303.647	344.624	1328.58	222.731	345.218	34.4981						2.43642	1.08211	0.231303	4.074	0.543643	0.205855	1.42889	0.628376				715.699	688.467	555.103	834.049	804.876	424.804			-0.224376	-0.0764912	-0.0415723	-0.133739	0.0118666	-0.435836	-0.150025	0.0660453
256	765	311.445	334.284	1390.72	249.706	344.685	36.3295						2.52467	1.01964	0.288897	4.68851	0.541259	0.26987	1.55547	0.714796				733.083	721.572	575.554	803.066	806.632	440.25			-0.205536	-0.0320846	-0.00626089	-0.165918	0.0140741	-0.415324	-0.135175	0.0668084
257	768	303.46	360.885	1442.8	241.996	331.122	40.5479						2.43431	1.18035	0.337166	4.51288	0.480612	0.417321	1.56044	0.673155				714.808	686.492	580.766	798.56	820.395	441.744			-0.225341	-0.0791402	0.00273786	-0.170598	0.031377	-0.413339	-0.142384	0.0674161
258	771	321.73	358.432	1329.95	199.885	322.794	63.1801						2.64107	1.16554	0.232577	3.55355	0.443374	1.20841	1.54075	0.530059				719.495	713.413	567.187	812.097	816.065	459.016			-0.220261	-0.043029	-0.0207082	-0.156539	0.0259335	-0.390401	-0.134167	0.0633456
259	774	312.11	340.597	1339.39	262.667	359.576	39.9923						2.5322	1.05778	0.241321	4.98376	0.607843	0.3979	1.6368	0.750115				721.344	710.886	599.583	797.809	819.788	455.581			-0.218258	-0.0464188	0.0352255	-0.171378	0.0306145	-0.394964	-0.12753	0.0682527
260	777	308.982	381.577	1377.82	208.502	316.296	36.4138						2.49679	1.30537	0.276942	3.74984	0.414315	0.272817	1.41935	0.584089				697.661	733.041	549.109	785.761	818.346	439.145			-0.243924	-0.0167001	-0.0519211	-0.183892	0.0288012	-0.416791	-0.147405	0.0684265
261	780	335.583	384.914	1345.69	208.939	354.75	45.1494						2.79784	1.32553	0.247164	3.75981	0.586262	0.578163	1.54913	0.579119				706.44	742.134	570.134	800.008	819.995	463.601			-0.23441	-0.00450279	-0.0156198	-0.169095	0.0308747	-0.384312	-0.129511	0.0662863
262	783	336.209	363.073	1324.31	202.097	328.865	40.6513						2.80493	1.19357	0.227351	3.60393	0.470519	0.420935	1.45354	0.578912				717.174	733.514	551.009	798.049	840.186	468.421			-0.222777	-0.0160659	-0.0486401	-0.17113	0.0562581	-0.37791	-0.130044	0.0648206
263	786	311.914	387.33	1343.18	200.197	343.914	31.1571						2.52998	1.34013	0.244839	3.56066	0.537812	0.0890727	1.38375	0.5699				734.759	733.157	589.673	776.946	821.988	503.486			-0.20372	-0.0165441	0.0181156	-0.193048	0.0333799	-0.331343	-0.115527	0.0606067
264	789	320.193	362.04	1335.02	177.796	326.332	30.2452						2.62368	1.18733	0.237275	3.05033	0.459192	0.057198	1.26917	0.52293				726.25	693.543	584.944	774.09	812.583	489.557			-0.212941	-0.0696827	0.00995063	-0.196014	0.0215557	-0.349842	-0.132829	0.0593613
265	792	312.767	355.739	1354.62	206.194	354.03	31.9732						2.53963	1.14926	0.255436	3.69726	0.583044	0.117599	1.39037	0.584821				735.69	733.874	576.679	759.436	817.431	479.157			-0.202711	-0.0155823	-0.00431918	-0.211234	0.0276501	-0.363653	-0.128308	0.063299
266	795	288.414	359.522	1308.88	231.287	368.704	45.6015						2.26403	1.17212	0.213046	4.2689	0.648661	0.593966	1.52679	0.620636				721.154	693.988	574.804	798.782	838.225	500.734			-0.218464	-0.069085	-0.0075572	-0.170368	0.0537922	-0.334998	-0.124447	0.0588152
267	798	316.457	356.644	1332.69	197.272	340.465	40.5671						2.5814	1.15473	0.235111	3.49403	0.522387	0.417992	1.40094	0.545659				699.339	729.564	584.679	782.173	830.564	507.016			-0.242105	-0.0213638	0.00949344	-0.187618	0.0441606	-0.326655	-0.120681	0.0620837
268	801	298.202	368.498	1343.01	206.609	327.356	42.4713						2.37481	1.22635	0.244677	3.70673	0.463769	0.484552	1.41681	0.558243				716.482	706.052	561.623	772.938	818.755	505.123			-0.223527	-0.0529023	-0.0303147	-0.197211	0.0293146	-0.329169	-0.133968	0.0560061
269	804	350.252	378.462	1321.62	175.383	333.25	36.6015						2.96385	1.28655	0.224852	2.99538	0.490129	0.279378	1.37336	0.531166				718.272	704.694	557.131	777.615	830.706	530.067			-0.221587	-0.0547246	-0.0380706	-0.192353	0.0443392	-0.296042	-0.126406	0.0530032
270	807	312.85	364.413	1293.25	166.398	361.42	39.0958						2.54057	1.20167	0.19856	2.79068	0.616087	0.366564	1.28569	0.459049				728.489	696.196	590.368	764.831	834.368	512.532			-0.210515	-0.066124	0.0193151	-0.205631	0.0489438	-0.319329	-0.122223	0.0594646
271	810	307.997	353.106	1340.68	186.133	345.934	40.4483						2.48565	1.13335	0.242518	3.24025	0.546841	0.41384	1.34374	0.505221				700.837	752.083	585.894	770.117	825.95	536.518			-0.240482	0.00884359	0.0115912	-0.20014	0.0383602	-0.287474	-0.11155	0.0598756
272	813	295.868	382.205	1272.8	150.204	275.522	32.0843						2.34839	1.30916	0.179609	2.42178	0.231998	0.121482	1.10207	0.443747				713.257	744.38	595.639	784.751	819.994	518.921			-0.227022	-0.00148987	0.0284159	-0.184941	0.030873	-0.310844	-0.110835	0.0606693
273	816	339.61	351.931	1278.53	144.269	337.246	35.6973						2.84343	1.12625	0.18492	2.28656	0.507996	0.247772	1.19949	0.458363				717.556	724.711	589.875	768.331	830.562	522.982			-0.222363	-0.0278733	0.0184652	-0.201995	0.0441588	-0.305451	-0.115843	0.0594693
274	819	335.859	352.218	1299.81	145.269	339.45	16.1916						2.80097	1.12799	0.20464	2.30934	0.517848	-0.434035	1.08779	0.511518				739.33	724.859	563.495	785.805	843.524	551.954			-0.198765	-0.0276757	-0.027082	-0.183846	0.0604537	-0.266975	-0.107315	0.0518451
275	822	329.117	364.617	1267.04	135.978	375.278	28.6973						2.72467	1.2029	0.174274	2.0977	0.678056	0.00309229	1.14678	0.442366				716.656	711.401	569.779	766.601	846.139	541.149			-0.223338	-0.0457273	-0.0162331	-0.203792	0.0637416	-0.281324	-0.117779	0.0558989
276	825	311.482	389.389	1238.52	131.523	355.88	39.9195						2.52509	1.35257	0.147837	1.99621	0.591317	0.395356	1.16806	0.388671				707.694	726.686	561.062	789.298	842.223	554.484			-0.23305	-0.0252243	-0.0312828	-0.180219	0.058819	-0.263615	-0.112429	0.0533908
277	828	318.61	375.584	1269.55	148.588	354.726	34.5632						2.60577	1.26916	0.176595	2.38495	0.586156	0.20813	1.20513	0.439427				725.732	740.944	634.841	792.656	817.071	521.688			-0.213502	-0.00609892	0.096102	-0.176731	0.0271981	-0.30717	-0.0967004	0.0645697
278	831	354.485	388.323	1220.05	130.05	335.724	40.1188						3.01176	1.34613	0.130719	1.96265	0.501188	0.402322	1.22579	0.452749				705.609	745.095	581.424	794.593	845.296	545.939			-0.23531	-0.000530503	0.00387274	-0.174718	0.0626815	-0.274962	-0.103161	0.0581929
279	834	310.528	373.871	1301.6	121.828	327.291	41.3602						2.51429	1.25881	0.206297	1.77534	0.463482	0.445714	1.11066	0.370261				719.259	740.353	588.284	814.156	830.194	542.526			-0.220517	-0.00689182	0.0157167	-0.154401	0.0436957	-0.279495	-0.100315	0.0555007
280	837	332.132	368.459	1241.22	138.133	354.816	46.7625						2.75879	1.22611	0.150339	2.14677	0.586558	0.634548	1.25052	0.412691				719.909	724.732	614.71	815.14	845.035	540.327			-0.219813	-0.0278447	0.0613446	-0.153378	0.0623543	-0.282416	-0.0932923	0.0599465
281	840	334.948	377.36	1255.3	146.15	353.469	30.5862						2.79066	1.27989	0.163394	2.32943	0.580536	0.0691173	1.20217	0.467238				717.279	743.304	590.664	779.65	824.466	575.51			-0.222663	-0.00293255	0.0198261	-0.190239	0.0364949	-0.235691	-0.0992008	0.0529178
282	843	337.561	360.851	1249.03	131.337	370.912	53.3602						2.82024	1.18015	0.157576	1.99196	0.658533	0.865165	1.27894	0.39612
283	846	353.632	355.502	1290.84	120.147	355.861	29.8429						3.00211	1.14783	0.196327	1.73705	0.591231	0.0431359	1.11961	0.455202
284	849	323.546	387.858	1250.5	137.097	363.615	35.9962						2.66162	1.34332	0.158946	2.12318	0.625902	0.25822	1.1952	0.420687
285	852	358.236	350.561	1197.64	121.305	368.792	39.0307						3.05422	1.11798	0.109951	1.76342	0.649054	0.364288	1.17649	0.445314
286	855	355.831	394.403	1268.92	118.634	334.544	38.1264						3.027	1.38286	0.176011	1.70259	0.495912	0.332679	1.18617	0.444198
287	858	334.344	380.353	1222.39	124.857	350.364	28.9923						2.78382	1.29797	0.132887	1.84434	0.566652	0.0134038	1.10651	0.440783
288	861	373.534	400.759	1192.42	148.022	369.077	27.1264						3.22734	1.42126	0.105112	2.37205	0.650327	-0.0518173	1.28738	0.534008
289	864	354.524	381.442	1191.88	121.398	373.7	48.7854						3.01221	1.30455	0.104616	1.76554	0.671	0.705257	1.26053	0.421006
290	867	328.656	426.089	1220.32	94.9928	348.231	29.364						2.71946	1.5743	0.130969	1.16401	0.557115	0.0263963	1.02871	0.416636
291	870	317.135	403.64	1189.7	128.946	325.501	30.1877						2.58907	1.43867	0.102594	1.9375	0.455477	0.0551881	1.09642	0.429543
292	873	377.613	402.762	1210.79	93.957	349.715	31.3142						3.27351	1.43336	0.122137	1.14042	0.563751	0.094564	1.10462	0.486192
293	876	353.227	441.868	1291.92	85	352.39	25.0728						2.99753	1.66963	0.197331	0.93637	0.57571	-0.123599	1.04216	0.466143
294	879	349.39	396.637	1194.45	87.5376	369.612	36.2261						2.9541	1.39636	0.106998	0.994179	0.652721	0.266256	1.06177	0.424624
295	882	348.957	440.191	1242.28	91.0394	357.6	37.0651						2.9492	1.6595	0.151322	1.07395	0.599006	0.295582	1.12143	0.429286
296	885	334.887	404.861	1198.25	109.559	317.437	33.5364						2.78996	1.44605	0.110515	1.49585	0.419418	0.172239	1.07234	0.425474
297	888	344.991	415.703	1183.87	89.7061	357.195	23.4598						2.90432	1.51155	0.0971859	1.04358	0.597196	-0.179981	0.995641	0.456785
298	891	334.356	453.413	1192.93	99.2151	351.338	36.4789						2.78396	1.73938	0.105583	1.2602	0.571008	0.275092	1.12254	0.416985
299	894	350.899	415.099	1168.5	118.262	347.758	27.0038						2.97118	1.5079	0.0829457	1.6941	0.554999	-0.0561027	1.12584	0.472039
300	897	337.613	441.571	1204.57	81.4767	321.827	34.5172						2.82083	1.66783	0.116374	0.856106	0.439046	0.206522	1.01778	0.42838

## Sheet: F
	hugin/GC6m 50glucose_0004.oir	hugin/GC6m 50glucose_0005.oir	hugin/GC6m 50glucose_0006.oir	hugin/GC6m 50glucose_0007.oir	hugin/GC6m 50glucose_0009.oir	hugin/GC6m 50glucose_0010.oir					hugin/GC6m 50glucose_0004.oir	hugin/GC6m 50glucose_0005.oir	hugin/GC6m 50glucose_0006.oir	hugin/GC6m 50glucose_0007.oir	hugin/GC6m 50glucose_0009.oir	hugin/GC6m 50glucose_0010.oir						hugin/Gc6m hex-Ci.oir	hugin/GC6m hex-Ci_0001.oir	hugin/GC6m hex-Ci_0002.oir	hugin/GC6m hex-Ci_0003.oir	hugin/Gc6m hex-Ci_0004.oir	hugin/Gc6m hex-Ci_0005.oir	hugin/Gc6m hex-Ci_0006.oir	hugin/Gc6m hex-Ci_0007.oir						hugin/Gc6m hex-Ci.oir	hugin/GC6m hex-Ci_0001.oir	hugin/GC6m hex-Ci_0002.oir	hugin/GC6m hex-Ci_0003.oir	hugin/Gc6m hex-Ci_0004.oir	hugin/Gc6m hex-Ci_0005.oir	hugin/Gc6m hex-Ci_0006.oir	hugin/Gc6m hex-Ci_0007.oir
time（sec）	raw data	raw data	raw data	raw data	raw data	raw data					F/F0	F/F0	F/F0	F/F0	F/F0	F/F0	Mean	SEM				raw data	raw data	raw data	raw data	raw data	raw data	raw data	raw data						F/F0	F/F0	F/F0	F/F0	F/F0	F/F0	F/F0	F/F0	mean	SEM
0	228.054	114.575	227.999	83.9798	282.727	57.5795					0.0213582	0.0350047	-0.000896217	0.0800705	-0.0545905	-0.0185598	0.0103978	0.0189469				408.037	523.567	470.702	727.037	959.05	1039.33	420.419	542.047						-0.0489831	-0.237985	-0.0268316	-0.169676	-0.0116621	0.035684	0.0788364	0.0814142	-0.0374004	0.0404458
3	221.952	105.312	226.975	75.3256	288.409	60.3976					-0.00596881	-0.0486789	-0.00538344	-0.0312318	-0.0355915	0.0294746	-0.01623	0.0114959				418.861	540.27	480.459	815.37	951.545	1026.62	438.655	556.91						-0.0237555	-0.213674	-0.00665818	-0.0687946	-0.0193963	0.0230171	0.12563	0.111068	-0.00907032	0.0376461
6	218.405	112.058	230.39	79.3377	294.365	53.2934					-0.0218562	0.0122631	0.00957863	0.0203681	-0.0156739	-0.0916162	-0.0144894	0.0168466				406.955	570.552	482.766	880.886	981.658	1031.81	421.78	538.422						-0.0515047	-0.169601	-0.00189014	0.00602999	0.0116361	0.0281889	0.0823284	0.0741837	-0.00257863	0.0282259
9	216.574	107.948	229.452	75.5136	294.317	63.181					-0.030056	-0.0248669	0.00546827	-0.0288139	-0.0158358	0.0769175	-0.00286446	0.0168322				433.69	571.186	478.998	914.535	955.771	1029.14	432.141	526.327						0.0108081	-0.168679	-0.0096796	0.0444592	-0.0150406	0.0255248	0.108915	0.0500519	0.00579504	0.0285408
12	215.973	108.39	226.381	81.1284	300.373	61.6252					-0.0327481	-0.0208732	-0.00798681	0.0433985	0.00441551	0.050399	0.00610081	0.0138943				418.108	581	489.346	900.191	976.844	1025.01	416.983	531.696						-0.0255084	-0.154394	0.0117137	0.0280772	0.00667504	0.0214106	0.0700185	0.0607649	0.00234465	0.0248092
15	219.807	99.8511	234.849	79.7553	286.941	59.8766					-0.0155758	-0.0980057	0.0291199	0.0257389	-0.0405004	0.0205941	-0.0131048	0.0203242				434.85	597.396	489.016	914.896	960.71	1016.23	407.851	529.619						0.0135105	-0.130531	0.0110331	0.0448707	-0.00995146	0.0126662	0.0465857	0.0566212	0.00560064	0.021019
18	209.758	100.519	233.743	77.1618	287.084	55.9872					-0.060582	-0.0919696	0.0242725	-0.00761626	-0.0400205	-0.0457005	-0.0369361	0.0166135				446.967	615.973	477.261	886.696	980.18	1025.65	406.847	534.227						0.0417532	-0.103493	-0.0132712	0.012665	0.0101136	0.0220536	0.0440099	0.065813	0.00995545	0.0183492
21	208.882	104.536	216.704	78.2983	306.668	60.4534					-0.0645026	-0.055687	-0.0503919	0.00700035	0.0254647	0.0304257	-0.0179485	0.0177869				437.44	654.87	493.121	910.415	977.624	1011.7	415.797	530.253						0.019549	-0.0468823	0.0195186	0.0397536	0.00747886	0.00815393	0.0669744	0.0578854	0.0215539	0.012524
24	213.763	106.052	221.256	86.7472	282.708	52.4214					-0.0426422	-0.0419869	-0.030447	0.115662	-0.0546531	-0.106479	-0.0267577	0.0305041				434.997	644.537	493.269	891.323	989.726	1005.42	377.096	494.52						0.0138548	-0.0619208	0.0198255	0.0179495	0.0199504	0.00189587	-0.0323356	-0.0134049	-0.00427317	0.0105409					Mean
27	212.317	109.106	230.793	81.5561	303.31	57.6718					-0.0491218	-0.0144053	0.0113472	0.0488992	0.0142385	-0.0169866	-0.00100479	0.0136938				452.16	683.84	480.203	869.817	975.867	999.312	385.184	496.865						0.0538557	-0.00471816	-0.00718786	-0.00661165	0.00566903	-0.00419439	-0.0115803	-0.00872553	0.00206336	0.00761106					SEM
30	226.894	115.488	221.201	91.001	298.223	53.6335					0.016163	0.0432494	-0.030688	0.170371	-0.00277319	-0.0858192	0.0184171	0.0353257				444.149	762.116	469.923	896.1	1000.94	1006.42	381.622	492.223						0.0351855	0.109208	-0.0284424	0.0234051	0.0315072	0.00289017	-0.0207207	-0.017986	0.0168809	0.0158088
33	225.914	108.019	235.006	73.5753	303.791	58.9735					0.0117767	-0.0242192	0.0298088	-0.0537425	0.0158453	0.00520084	-0.00255501	0.0125712				439.536	783.151	458.055	894.19	963.077	1007.78	377.768	489.838						0.0244327	0.139823	-0.0529791	0.0212238	-0.00751187	0.00424829	-0.0306115	-0.022745	0.009485	0.0207939
36	227.129	109.206	230.83	73.8241	298.914	57.6463					0.0172177	-0.0135001	0.0115102	-0.0505427	-0.000462227	-0.0174212	-0.00886638	0.00999631				434.132	799.312	450.495	893.644	980.497	1006.45	358.548	495.903						0.0118369	0.163344	-0.0686085	0.0205999	0.0104402	0.00292156	-0.0799306	-0.0106454	0.00624478	0.0261386
39	228.088	117.097	231.589	76.3519	299.473	57.5356					0.0215118	0.0577869	0.0148367	-0.0180324	0.00140534	-0.0193081	0.00970002	0.0117723				433.492	793.294	501.822	864.111	991.279	1014.48	349.704	483.252						0.0103459	0.154584	0.0375097	-0.0131285	0.0215518	0.0109199	-0.102626	-0.0358851	0.010409	0.0257458					P value
42	229.321	117.582	225.94	75.3104	294.247	61.1545					0.0270343	0.0621627	-0.00991798	-0.0314273	-0.0160705	0.0423759	0.0123595	0.0150759				430.108	776.303	496.911	882.672	972.962	991.024	376.24	470.049						0.00245806	0.129856	0.0273559	0.00806892	0.0026749	-0.0124537	-0.0345307	-0.0622246	0.00765056	0.020018					95% confidence interval
45	217.341	111.011	228.201	72.3145	316.371	59.2249					-0.0266214	0.00280604	-1.3672e-05	-0.0699578	0.0579125	0.00948595	-0.00439805	0.0172612				421.552	770.331	498.425	892.885	958.736	978.845	377.485	475.404						-0.0174824	0.121164	0.030485	0.0197337	-0.0119857	-0.0245894	-0.0313382	-0.0515413	0.00430571	0.0191533					F, DFn, Dfd
48	231.171	112.019	231.626	75.7543	299.674	58.0375					0.0353211	0.0119144	0.0149962	-0.0257182	0.00207846	-0.0107532	0.00463977	0.0086922				418.377	772.878	489.904	892.69	946.61	972.71	370.986	463.601						-0.0248838	0.124871	0.012868	0.0195107	-0.0244819	-0.0307031	-0.0480153	-0.0750903	-0.00574061	0.0215393
51	241.522	115.463	217.76	71.7371	320.789	66.6481					0.0816785	0.0430245	-0.0457653	-0.0773837	0.0726862	0.136014	0.0350424	0.0331765				417.034	779.73	491.624	878.156	954.858	966.532	364.723	460.189						-0.0280128	0.134843	0.0164244	0.00291135	-0.0159817	-0.03686	-0.0640862	-0.0818967	-0.00908229	0.0235334
54	232.731	117.849	238.774	70.0253	312.852	58.4799					0.0423077	0.0645791	0.0463186	-0.0993993	0.0461436	-0.00321255	0.0161229	0.024877				429.482	764.172	490.053	860.075	960.977	968.188	369.889	462.989						0.000999737	0.112201	0.0131762	-0.0177381	-0.00967579	-0.0352089	-0.05083	-0.0763099	-0.00792327	0.0199625
57	240.099	121.926	224.606	76.3822	309.813	59.5466					0.0753059	0.101402	-0.0157667	-0.0176428	0.0359816	0.0149693	0.0323749	0.0197848				421.133	757.153	491.244	846.44	968.416	947.76	344.222	450.439						-0.0184594	0.101984	0.0156386	-0.0333098	-0.00200982	-0.0555654	-0.116694	-0.101348	-0.0262204	0.0244861
60	229.229	117.218	228.301	73.3772	309.964	64.6389					0.0266201	0.0588745	0.0004276	-0.0562903	0.0364875	0.101767	0.0279811	0.0218586				412.069	744.054	457.337	881.712	964.308	959.732	357.25	450.347						-0.0395841	0.0829198	-0.0544625	0.00697299	-0.00624359	-0.0436355	-0.0832606	-0.101532	-0.0298532	0.0204903
63	231.543	115.213	225.991	72.2548	293.209	60.7852					0.0369849	0.0407662	-0.00969756	-0.0707256	-0.0195398	0.0360812	0.00231155	0.0180532				423.95	734.669	463.985	860.442	954.588	976.697	343.025	441.646						-0.0118947	0.0692606	-0.0407185	-0.017319	-0.0162603	-0.0267304	-0.119766	-0.11889	-0.0352898	0.0217087
66	220.59	119.595	225.708	78.5369	312.998	60.5658					-0.01207	0.080346	-0.0109364	0.010069	0.0466339	0.0323415	0.0243973	0.0146873				424.8	720.574	453.782	851.688	942.721	1003.58	350.928	429.94						-0.0099115	0.0487462	-0.0618137	-0.0273159	-0.0284901	5.86385e-05	-0.099484	-0.142245	-0.0400569	0.0211911
69	233.333	123.527	221.305	75.365	304.172	69.5302					0.0450002	0.115865	-0.0302297	-0.030725	0.017118	0.185139	0.0503613	0.034957				415.168	755.519	452.406	861.606	927.762	981.575	368.587	446.709						-0.0323614	0.0996063	-0.0646571	-0.0159894	-0.0439055	-0.0218696	-0.0541695	-0.108789	-0.030267	0.0212349
72	233.723	115.523	220.038	68.6087	307.117	64.9634					0.0467504	0.0435647	-0.035783	-0.117618	0.0269671	0.107298	0.0118632	0.0319342				428.907	741.773	439.499	847.377	943.545	956.886	366.997	446.789						-0.000339725	0.0795992	-0.0913425	-0.0322398	-0.0276407	-0.046472	-0.0582494	-0.108629	-0.0356643	0.020555
75	238.234	122.046	224.65	67.1951	298.148	54.7532					0.0669529	0.10249	-0.015573	-0.135799	-0.00302365	-0.066734	-0.0086145	0.0354438				431.782	718.818	433.537	814.663	923.685	945.068	376.38	425.079						0.00635991	0.0461907	-0.103669	-0.069602	-0.0481065	-0.0582482	-0.0341737	-0.151943	-0.051649	0.0217068
78	236.765	119.278	217.381	70.087	326.379	62.6554					0.0603707	0.0774815	-0.0474253	-0.0986058	0.0913775	0.0679587	0.0251929	0.0320314				422.55	719.251	434.339	826.531	935.888	950.775	377.928	428.254						-0.0151568	0.0468201	-0.102011	-0.0560473	-0.035531	-0.0525616	-0.0302009	-0.145608	-0.048787	0.0202955
81	236.982	112.345	229.536	68.0283	291.724	64.4223					0.061343	0.0148539	0.00583812	-0.125083	-0.0245058	0.0980754	0.00508694	0.0314788				427.564	715.063	427.471	818.966	925.866	951.505	376.627	435.772						-0.00346964	0.0407258	-0.116211	-0.0646868	-0.0458597	-0.0518338	-0.0335376	-0.13061	-0.0506853	0.019722
84	225.72	114.91	219.023	72.4439	298.93	61.0091					0.0109065	0.0380263	-0.0402326	-0.0682935	-0.000410062	0.0398976	-0.00335096	0.0176751				441.139	706.203	448.313	808.807	937.416	952.414	383.3	435.512						0.02817	0.0278304	-0.0731203	-0.0762891	-0.0339565	-0.0509275	-0.0164156	-0.131128	-0.0407296	0.0192141
87	221.351	126.324	224.105	74.453	305.69	63.0192					-0.00866089	0.141138	-0.0179625	-0.0424543	0.0221937	0.0741596	0.0280689	0.0279195				422.532	670.217	431.053	770.547	947.361	947.51	386.038	429.101						-0.0151994	-0.0245448	-0.108805	-0.119985	-0.0237078	-0.0558142	-0.0093878	-0.14392	-0.0626705	0.0189577
90	229.886	113.992	223.869	70.6532	306.663	51.0731					0.0295629	0.0297319	-0.0189945	-0.0913239	0.0254489	-0.129461	-0.0258393	0.028202				424.769	636.734	435.789	785.015	924.074	956.962	352.358	414.444						-0.00998352	-0.0732767	-0.0990143	-0.103461	-0.0477058	-0.0463955	-0.095815	-0.17316	-0.0811016	0.0173981
93	222.302	122.53	188.225	57.4115	246.295	53.4104					-0.00440265	0.106864	-0.17519	-0.261626	-0.176416	-0.089622	-0.100066	0.0546673				420.485	621.767	438.144	755.846	914.988	918.832	377.714	395.241						-0.0199685	-0.0950607	-0.0941454	-0.136774	-0.0570694	-0.0843926	-0.0307503	-0.211472	-0.0912041	0.0217556
96	243.461	118.16	179.305	89.277	314.64	62.4625					0.0903593	0.0673849	-0.214276	0.148198	0.0521219	0.0646707	0.0347432	0.0517168				434.728	583.935	435.616	750.231	953.248	937.056	392.544	393.502						0.0132262	-0.150123	-0.0993701	-0.143187	-0.0176414	-0.0662322	0.00730697	-0.214941	-0.0838702	0.0292056
99	256.926	131.653	226.215	99.0566	374.699	56.6271					0.150664	0.18927	-0.00871642	0.273974	0.252954	-0.0347934	0.137225	0.0535014				428.23	517.362	427.591	735.497	952.821	919.808	351.689	407.278						-0.00191902	-0.247016	-0.115963	-0.160014	-0.0180808	-0.0834192	-0.0975319	-0.187457	-0.113925	0.0293316
102	285.05	138.573	245.445	84.8645	380.959	65.1993					0.276622	0.251789	0.0755504	0.0914487	0.273888	0.111319	0.180103	0.0394853				432.402	487.422	442.358	721.356	922.072	911.832	362.133	371.659						0.00780612	-0.29059	-0.0854328	-0.176164	-0.0497692	-0.0913675	-0.0707321	-0.25852	-0.126846	0.0370273
105	299.409	152.835	223.893	77.6471	425.98	69.7934					0.340929	0.380615	-0.0188894	-0.00137478	0.424431	0.189626	0.219223	0.0794161				445.428	466.048	420.204	728.849	916.314	896.095	368.354	398.883						0.0381644	-0.3217	-0.131235	-0.167606	-0.0557029	-0.107049	-0.0547682	-0.204205	-0.125513	0.0386134
108	347.179	148.959	265.546	71.3134	523.616	74.3455					0.554873	0.345602	0.163636	-0.082833	0.750918	0.267216	0.333235	0.119718				420.745	322.155	403.784	700.978	903.298	895.841	348.505	320.704						-0.0193623	-0.531126	-0.165183	-0.199437	-0.0691163	-0.107302	-0.105703	-0.360176	-0.194676	0.0602868
111	335.317	157.396	266.667	80.458	569.807	74.6353					0.501744	0.421821	0.168548	0.0347764	0.905374	0.272156	0.38407	0.124901				414.447	650.107	401.312	657.083	897.63	886.27	381.206	345.168						-0.0340433	-0.0538135	-0.170295	-0.249568	-0.0749578	-0.11684	-0.0217895	-0.31137	-0.129085	0.0374959
114	383.894	159.955	252.352	105.384	600.85	85.0037					0.719301	0.444936	0.105818	0.355354	1.00918	0.448885	0.513912	0.12756				396.849	561.676	394.791	663.23	901.979	845.897	389.314	400.623						-0.0750587	-0.182519	-0.183776	-0.242548	-0.0704763	-0.157071	-0.000983316	-0.200733	-0.139146	0.0288441
117	451.113	179.232	271.076	87.8726	588.741	85.3218					1.02035	0.61907	0.187868	0.130136	0.968688	0.454307	0.563403	0.154575				384.937	562.694	391.233	666.997	895.438	849.178	384.278	391						-0.102821	-0.181037	-0.191132	-0.238245	-0.0772164	-0.153802	-0.0139059	-0.219933	-0.147261	0.0271676
120	488.894	186.427	280.906	130.859	621.165	89.3254					1.18955	0.684072	0.230942	0.682994	1.07711	0.522548	0.731203	0.144693				381.008	570.4	365.966	631.251	901.883	830.205	385.914	392.387						-0.111978	-0.169822	-0.243372	-0.27907	-0.0705752	-0.172708	-0.00970651	-0.217166	-0.1593	0.0320551
123	501.349	192.204	279.211	159.323	623.151	94.9717					1.24533	0.736254	0.223515	1.04906	1.08375	0.618789	0.826117	0.153407				366.034	513.073	382.587	621.546	888.011	817.878	370.526	390.607						-0.146878	-0.253258	-0.209007	-0.290153	-0.0848707	-0.184992	-0.0491939	-0.220716	-0.179884	0.029057
126	495.121	204.392	290.339	169.365	623.013	94.0996					1.21744	0.846349	0.272281	1.17822	1.08329	0.603924	0.866917	0.151633				354.593	476.052	371.104	610.15	873.694	810.134	373.283	372.858						-0.173545	-0.307139	-0.232748	-0.303169	-0.0996248	-0.192709	-0.0421191	-0.256128	-0.200898	0.0332988
129	516.747	229.166	296.601	197.373	638.894	99.5146					1.3143	1.07015	0.299721	1.53843	1.13639	0.696222	1.0092	0.18206				344.284	459.596	390.36	611.027	893.808	817.225	355.214	379.279						-0.197572	-0.33109	-0.192936	-0.302167	-0.0788966	-0.185642	-0.0884862	-0.243316	-0.202513	0.0318512
132	567.898	215.94	294.074	201.17	606.279	99.8501					1.54338	0.950674	0.288649	1.58726	1.02733	0.701941	1.01654	0.203022				310.671	446.733	378.86	594.12	888.236	809.938	356.956	384.27						-0.275915	-0.349811	-0.216714	-0.321477	-0.0846381	-0.192904	-0.0840161	-0.233359	-0.219854	0.0348499
135	584.634	223.487	306.346	195.698	618.14	97.8803					1.61834	1.01885	0.342421	1.51688	1.067	0.668366	1.03864	0.198979				314.598	419.048	377.766	605.303	875.969	809.194	375.706	364.49						-0.266761	-0.390104	-0.218974	-0.308704	-0.0972803	-0.193645	-0.035903	-0.272822	-0.223024	0.0403898
138	572.377	229.667	298.792	197.527	643.663	109.907					1.56344	1.07468	0.309323	1.54041	1.15234	0.873357	1.08559	0.190386				296.266	414.777	380.463	599.929	886.347	807.214	370.462	360.995						-0.309488	-0.39632	-0.2134	-0.314841	-0.0865847	-0.195619	-0.0493599	-0.279794	-0.230676	0.0418993
141	600.336	227.539	301.568	194.066	614.117	106.453					1.68866	1.05545	0.321485	1.49589	1.05354	0.814478	1.07158	0.199178				275.375	435.925	374.562	568.072	888.459	783.111	365.841	347.179						-0.358179	-0.365542	-0.225599	-0.351224	-0.0844085	-0.219637	-0.0612178	-0.307358	-0.246646	0.0429026
144	593.538	238.046	288.599	185.518	651.992	107.151					1.65821	1.15036	0.264654	1.38596	1.18019	0.826381	1.07763	0.197653				241.681	384.924	370.688	532.635	900.406	814.405	382.883	379.988						-0.436709	-0.43977	-0.233609	-0.391696	-0.0720964	-0.188453	-0.0174856	-0.241901	-0.252715	0.056809
147	596.139	238.391	301.626	200.681	634	97.8675					1.66986	1.15348	0.32174	1.58098	1.12003	0.668147	1.08571	0.212156				247.191	369.858	373.512	535.593	878.317	808.88	387.017	362.98						-0.423868	-0.461697	-0.22777	-0.388317	-0.09486	-0.193959	-0.0068779	-0.275833	-0.259148	0.0568498
150	598.589	240.185	301.199	173.506	651.033	109.308					1.68083	1.16968	0.319869	1.23147	1.17699	0.86315	1.07366	0.18493				248.842	374.595	364.276	543.361	885.5	805.608	369.42	352.248						-0.420021	-0.454803	-0.246865	-0.379446	-0.0874581	-0.197218	-0.0520332	-0.297246	-0.266886	0.052774
153	592.794	233.846	303.533	176.49	559.133	118.173					1.65488	1.11243	0.330096	1.26986	0.869681	1.01425	1.04187	0.179794				244.089	342.192	363.417	527.278	889.589	755.945	358.356	340.238						-0.431099	-0.501963	-0.248642	-0.397814	-0.0832442	-0.246707	-0.0804238	-0.321205	-0.288887	0.0547201
156	612.739	231.272	306.854	178.376	595.768	122.332					1.74421	1.08917	0.344648	1.29411	0.992184	1.08514	1.09158	0.185721				222.719	321.74	375.231	519.902	880.587	795.947	393.722	355.249						-0.480905	-0.531729	-0.224216	-0.406238	-0.0925208	-0.206845	0.0103293	-0.291258	-0.277923	0.0665021
159	579.282	221.431	314.817	191.022	624.473	111.636					1.59437	1.00027	0.379545	1.45675	1.08817	0.902834	1.07032	0.176484				208.466	285.582	362.636	507.7	892.716	768.389	393.534	339.167						-0.514125	-0.584354	-0.250256	-0.420173	-0.0800217	-0.234307	0.00984561	-0.323342	-0.299592	0.0723183
162	584.578	236.815	312.648	143.634	575.378	123.408					1.61808	1.13925	0.370037	0.847288	0.924002	1.10348	1.00036	0.16714				189.487	312.486	364.05	503.238	903.969	787.142	390.231	312.393						-0.558361	-0.545199	-0.247334	-0.425269	-0.0684253	-0.21562	0.0013698	-0.376759	-0.304449	0.0735142
165	575.37	228.256	308.728	180.375	639.501	122.376					1.57685	1.06192	0.352862	1.31982	1.13842	1.08589	1.08929	0.166969				168.534	308.019	373.199	485.904	894.519	787.524	388.331	326.481						-0.607195	-0.5517	-0.228418	-0.445066	-0.0781633	-0.215239	-0.00350399	-0.348651	-0.309742	0.076742
168	572.464	247.669	300.472	233.184	613.872	108.573					1.56383	1.23729	0.316682	1.999	1.05272	0.850624	1.17002	0.237401				219.389	306.38	374.783	469.648	910.956	811.082	390.54	307.296						-0.488666	-0.554085	-0.225143	-0.463631	-0.0612249	-0.191764	0.002164	-0.386926	-0.296159	0.0731928
171	583.159	244.179	288.138	234.824	659.869	112.455					1.61173	1.20577	0.262635	2.02009	1.20653	0.916794	1.20392	0.245011				224.739	275.968	381.633	489.001	899.036	796.39	399.135	318.13						-0.476197	-0.598347	-0.210981	-0.441529	-0.073509	-0.206404	0.0242188	-0.365313	-0.293508	0.0752515
174	579.457	237.663	302.467	231.428	619.629	111.697					1.59515	1.1469	0.325426	1.97641	1.07197	0.903862	1.16995	0.232761				223.841	251.208	355.432	473.699	921.107	777.842	386.644	314.771						-0.47829	-0.634384	-0.265151	-0.459005	-0.0507636	-0.224887	-0.00783402	-0.372013	-0.311541	0.0764548
177	569.502	239.96	298.834	238.698	609.243	120.204					1.55056	1.16766	0.309503	2.06991	1.03725	1.04887	1.19729	0.239649				228.499	265.254	366.657	454.879	901.033	768.719	411.38	333.132						-0.467435	-0.61394	-0.241942	-0.480499	-0.0714508	-0.233979	0.0556397	-0.335383	-0.298624	0.0787008
180	572.714	246.58	296.827	265.113	631.131	124.813					1.56495	1.22745	0.300708	2.40964	1.11044	1.12743	1.2901	0.281098				218.884	244.58	349.901	456.908	921.368	735.681	407.909	324.764						-0.489845	-0.644031	-0.276585	-0.478181	-0.0504948	-0.2669	0.0467353	-0.352078	-0.313922	0.0814413
183	576.834	228.843	291.176	263.284	621.27	114.887					1.5834	1.06723	0.275947	2.38612	1.07746	0.958239	1.22473	0.288396				234.237	255.562	356.008	437.963	905.682	765.459	399.921	325.888						-0.45406	-0.628047	-0.263959	-0.499818	-0.0666598	-0.237227	0.0262355	-0.349835	-0.309171	0.0778281
186	586.933	245.261	302.211	247.177	637.864	110.256					1.62863	1.21554	0.324302	2.17896	1.13295	0.879307	1.22661	0.258989				217.599	288.788	341.259	448.182	908.654	792.476	374.909	332.47						-0.492839	-0.579688	-0.294453	-0.488147	-0.0635974	-0.210304	-0.0379472	-0.336703	-0.31296	0.0711448
189	573.247	244.546	293.631	256.445	615.232	115.397					1.56734	1.20908	0.286707	2.29816	1.05727	0.966932	1.23091	0.273498				223.334	270.487	336.14	446.014	886.58	792.871	397.345	315.813						-0.479473	-0.606324	-0.305036	-0.490623	-0.0863451	-0.209911	0.0196265	-0.369935	-0.316002	0.0757316
192	554.526	249.486	288.854	265.872	632.764	114.24					1.48349	1.25371	0.265774	2.41939	1.1159	0.947223	1.24758	0.288695				220.177	281.828	351.533	434.104	909.626	800.606	393.275	318.654						-0.48683	-0.589819	-0.273211	-0.504224	-0.0625949	-0.202204	0.00918202	-0.364267	-0.309246	0.0763323
195	574.656	242.064	278.382	226.486	625.342	124.846					1.57365	1.18666	0.219883	1.91286	1.09108	1.12799	1.18535	0.232691				209.777	304.594	360.286	413.057	893.507	801.857	393.697	331.94						-0.511069	-0.556685	-0.255115	-0.528261	-0.0792061	-0.200957	0.0102659	-0.337761	-0.307348	0.075637
198	555.843	251.353	300.223	216.714	561.201	118.97					1.48939	1.27057	0.315592	1.78717	0.876598	1.02784	1.12786	0.209657				201.625	284.673	347.493	423.765	895.215	797.635	390.964	310.46						-0.53007	-0.585678	-0.281564	-0.516032	-0.077446	-0.205163	0.00325049	-0.380614	-0.321665	0.0773193
201	534.919	247.775	279.059	221.455	577.445	113.177					1.39568	1.23825	0.22285	1.84815	0.930914	0.929102	1.09416	0.223103				219.879	278.447	340.407	424.174	891.232	781.066	393.139	327.721						-0.487524	-0.594739	-0.296214	-0.515565	-0.0815511	-0.221675	0.00883175	-0.346177	-0.316827	0.075311
204	556.537	250.537	287.149	221.423	658.134	111.016					1.4925	1.2632	0.258303	1.84773	1.20073	0.892255	1.15912	0.222155				210.634	282.182	334.236	412.574	868.809	772.548	392.581	327.327						-0.509071	-0.589304	-0.308973	-0.528813	-0.104658	-0.230163	0.00740192	-0.346965	-0.326318	0.0748856
207	575.089	250.24	298.408	235.381	621.805	127.199					1.57559	1.26052	0.30764	2.02726	1.07925	1.16811	1.23639	0.233312				209.437	293.092	332.075	391.815	867.327	763.728	404.515	317.467						-0.511863	-0.573424	-0.31344	-0.552522	-0.106187	-0.238952	0.0380247	-0.366635	-0.328125	0.0776045
210	538.596	241.964	281.366	258.631	645.897	121.335					1.41215	1.18576	0.232961	2.32627	1.15981	1.06816	1.23085	0.2746				202.649	320.629	333.602	406.987	913.033	772.885	408.512	314.274						-0.527683	-0.533346	-0.310284	-0.535194	-0.0590843	-0.229827	0.0482809	-0.373005	-0.315018	0.0790006
213	576.154	248.762	289.635	244.092	611.616	109.328					1.58036	1.24716	0.269196	2.13929	1.04518	0.863495	1.19078	0.260272				205.994	360.693	345.955	391.544	916.053	777.757	408.259	319.956						-0.519888	-0.475035	-0.284743	-0.552831	-0.0559723	-0.224972	0.0476311	-0.361669	-0.303435	0.0770991
216	541.451	240.783	270.475	238.681	646.683	113.665					1.42494	1.17509	0.185234	2.0697	1.16244	0.937407	1.15913	0.251508				201.987	339.925	342.142	387.912	938.521	773.938	411.515	333.301						-0.529226	-0.505262	-0.292626	-0.556979	-0.0328179	-0.228778	0.0559887	-0.335046	-0.303093	0.0807452
219	558.378	245.54	283.351	242.617	609.285	115.945					1.50075	1.21806	0.241658	2.12031	1.03739	0.976281	1.18241	0.253693				207.759	382.039	363.043	377.011	964.889	776.016	411.983	321.387						-0.515774	-0.443968	-0.249414	-0.569429	-0.00564412	-0.226707	0.057188	-0.358815	-0.28907	0.0806824
222	542.073	247.896	282.67	253.275	654.27	111.631					1.42772	1.23934	0.238674	2.25739	1.18781	0.902741	1.20895	0.269793				202.906	387.85	349.82	387.266	961.553	764.833	411.722	311.671						-0.527083	-0.435511	-0.276753	-0.557717	-0.00908282	-0.237851	0.0565175	-0.378198	-0.29571	0.0800063
225	563.096	243.012	291.077	246.977	625.782	112.197					1.52187	1.19522	0.275513	2.17639	1.09255	0.9124	1.19566	0.258572				203.67	407.546	351.541	378.517	960.804	786.483	418.409	309.115						-0.525303	-0.406845	-0.273196	-0.567709	-0.00985397	-0.216277	0.073678	-0.383297	-0.2886	0.0814261
228	549.368	242.497	284.603	246.231	654.066	111.409					1.46039	1.19057	0.247146	2.16679	1.18713	0.89897	1.19183	0.258256				208.765	427.111	355.167	377.718	986.885	808.894	412.25	313.184						-0.513428	-0.378369	-0.265699	-0.568621	0.017023	-0.193944	0.0578722	-0.375179	-0.277543	0.0808955
231	524.953	248.093	277.939	266.78	657.281	111.874					1.35105	1.24112	0.217942	2.43107	1.19788	0.906886	1.22432	0.293647				208.247	466.717	345.444	373.51	968.193	791.918	416.206	311.525						-0.514637	-0.320726	-0.285801	-0.573427	-0.00224005	-0.210861	0.0680252	-0.37849	-0.277269	0.07968
234	557.813	249.376	289.519	250.574	646.635	114.272					1.49821	1.25271	0.268687	2.22265	1.16228	0.947768	1.22539	0.262428				222.588	479.473	366.783	374.683	956.488	789.298	417.397	311.81						-0.481211	-0.302161	-0.241682	-0.572087	-0.0143021	-0.213471	0.0710804	-0.37792	-0.266469	0.0772476
237	526.155	232.827	287.702	266.665	663.537	111.577					1.35643	1.10322	0.260727	2.4296	1.2188	0.901822	1.21177	0.289622				216.995	532.376	339.072	372.579	961.567	780.415	414.324	292.564						-0.494246	-0.225164	-0.298973	-0.57449	-0.00906767	-0.222323	0.0631966	-0.416318	-0.272173	0.0788987
240	532.969	247.74	279.046	242.362	610.098	112.266					1.38695	1.23793	0.222796	2.11704	1.0401	0.913569	1.15306	0.253421				224.471	483.916	358.142	357.722	970.567	787.404	412.892	299.972						-0.476823	-0.295693	-0.259547	-0.591458	0.000207174	-0.215359	0.0595219	-0.401539	-0.272586	0.0789113
243	543.625	253.489	285.82	234.285	660.293	105.469					1.43467	1.28987	0.252475	2.01316	1.20795	0.797713	1.16597	0.243388				229.574	452.19	378.442	370.349	958.302	802.636	416.132	311.921						-0.464929	-0.341868	-0.217578	-0.577037	-0.0124327	-0.20018	0.0678343	-0.377699	-0.265486	0.0775709
246	559.77	247.54	287.387	225.131	637.644	106.935					1.50698	1.23613	0.259345	1.89543	1.13222	0.822704	1.14213	0.230279				232.627	443.253	380.907	357.193	969.775	796.313	420.491	310.236						-0.457813	-0.354876	-0.212481	-0.592063	-0.000608909	-0.206481	0.0790217	-0.381062	-0.265795	0.0801924
249	539.79	242.439	280.022	246.369	643.702	103.184					1.41749	1.19005	0.227069	2.16857	1.15247	0.758762	1.1524	0.265549				236.48	414.476	394.962	342.964	974.84	791.352	446.74	323.48						-0.448833	-0.396758	-0.183422	-0.608313	0.00461036	-0.211425	0.146379	-0.354638	-0.25655	0.0874163
252	513.296	244.735	282.712	266.909	649.814	109.452					1.29884	1.21079	0.238858	2.43274	1.17291	0.865598	1.20329	0.29245				240.411	443.146	384.67	362.051	980.382	796.186	447.199	319.173						-0.43967	-0.355031	-0.204701	-0.586514	0.0103216	-0.206608	0.147555	-0.363232	-0.249735	0.0848129
255	539.351	235.851	296.177	225.948	651.877	109.064					1.41553	1.13054	0.297861	1.90594	1.17981	0.858991	1.13144	0.219998				251.691	443.864	397.702	351.501	975.013	815.83	435.773	324.822						-0.413379	-0.353986	-0.177758	-0.598563	0.00478864	-0.187033	0.118236	-0.35196	-0.244957	0.0822554
258	536.371	243.411	289.31	238.28	632.888	109.035					1.40219	1.19883	0.26777	2.06454	1.11631	0.858492	1.15135	0.242679				249.72	429.882	411.301	342.481	996.061	824.476	444.404	332.935						-0.417974	-0.374337	-0.149641	-0.608864	0.0264795	-0.178417	0.140383	-0.335775	-0.237268	0.0868655
261	520.854	236.804	276.738	254.443	639.016	106.545					1.33269	1.13915	0.21268	2.27241	1.1368	0.816052	1.15163	0.275895				262.791	441.631	400.199	337.834	992.287	816.434	471.453	324.751						-0.387508	-0.357236	-0.172596	-0.614171	0.0225905	-0.186431	0.209794	-0.352103	-0.229708	0.0912129
264	531.38	252.043	273.02	280.123	623.825	102.99					1.37983	1.27681	0.196388	2.60269	1.08601	0.755459	1.2162	0.327722				266.109	485.349	398.284	347.55	981.335	857.949	451.064	312.908						-0.379776	-0.293607	-0.176555	-0.603075	0.0113036	-0.145062	0.157474	-0.375731	-0.225629	0.0850613
267	524.654	257.576	289.19	246.745	624.627	106.997					1.34971	1.32679	0.267244	2.17341	1.08869	0.823765	1.1716	0.258531				261.301	499.404	402.672	360.623	980.768	881.486	470.294	325.719						-0.390981	-0.273152	-0.167482	-0.588145	0.0107194	-0.121607	0.20682	-0.350173	-0.20925	0.0877757
270	532.683	250.48	282.421	275.188	610.927	99.0201					1.38567	1.26268	0.237581	2.53921	1.04287	0.687793	1.19264	0.318584				274.198	500.298	418.4	363.69	989.101	922.464	469.028	316.144						-0.360922	-0.27185	-0.134964	-0.584642	0.0193067	-0.0807732	0.203571	-0.369275	-0.197444	0.0883398
273	511.35	246.606	268.576	257.868	583.24	102.787					1.29012	1.22769	0.176915	2.31645	0.950294	0.752	1.11891	0.290153				269.452	494.661	422.387	361.567	990.865	952.827	467.991	304.761						-0.371985	-0.280055	-0.126722	-0.587066	0.0211247	-0.0505169	0.200911	-0.391984	-0.198287	0.090631
276	502.466	254.344	273.418	261.603	555.076	101.858					1.25034	1.29759	0.198129	2.36449	0.856117	0.73617	1.11714	0.297995				285.933	509.686	443.572	357.87	981.253	978.243	462.582	313.559						-0.333571	-0.258187	-0.0829212	-0.591289	0.0112195	-0.0251895	0.18703	-0.374432	-0.183418	0.0887646
279	504.473	243.393	260.779	231.757	603.922	95.9186					1.25933	1.19867	0.142744	1.98065	1.01945	0.634929	1.03929	0.253487				291.404	503.815	446.675	356.665	1004.45	1021.61	467.142	310.659						-0.32082	-0.266731	-0.0765058	-0.592665	0.0351264	0.0180225	0.198733	-0.380218	-0.173132	0.0922919
282	521.606	245.856	268.707	262.274	639.073	105.685					1.33606	1.22091	0.177488	2.37313	1.13699	0.80139	1.17433	0.29437				288.771	506.985	452.445	363.437	1019.05	1100.32	488.868	307.659						-0.326957	-0.262118	-0.0645773	-0.584931	0.0501709	0.0964617	0.254483	-0.386202	-0.152959	0.100043
285	511.617	251.903	276.239	237.499	565.632	93.17					1.29132	1.27554	0.210491	2.05449	0.891413	0.588079	1.05189	0.26213				284.067	493.297	452.957	344.547	1061.22	1114.42	473.088	308.818						-0.337922	-0.28204	-0.0635198	-0.606505	0.0936288	0.110511	0.213989	-0.383891	-0.156968	0.102002
288	505.624	251.379	263.347	207.724	487.27	93.7614					1.26448	1.2708	0.154	1.67155	0.62938	0.598159	0.931396	0.229534				292.593	517.477	449.745	353.554	1101.56	1155.85	472.592	294.682						-0.318049	-0.246847	-0.0701605	-0.596218	0.135205	0.151793	0.212716	-0.412092	-0.142957	0.104828
291	535.76	251.992	265.947	263.518	472.389	99.425					1.39945	1.27634	0.165394	2.38912	0.579618	0.694695	1.0841	0.320917				288.054	510.998	446.919	326.628	1094.91	1135.89	474.227	302.476						-0.328628	-0.256277	-0.0760016	-0.626969	0.128345	0.131902	0.216912	-0.396544	-0.150908	0.105942
294	515.378	258.45	284.066	245.859	531.292	91.9479					1.30817	1.33468	0.24479	2.16202	0.776584	0.567248	1.06558	0.279224				281.847	496.95	464.271	329.102	1150.75	1164.74	482.435	303.512						-0.343095	-0.276724	-0.0401274	-0.624144	0.185893	0.160652	0.237975	-0.394476	-0.136756	0.112476
297	494.312	245.627	272.597	197.104	564.841	97.7605					1.21382	1.21884	0.194534	1.53497	0.888769	0.666324	0.952877	0.194848				291.28	508.897	471.041	336.093	1176.59	1184.88	477.186	295.147						-0.32111	-0.259336	-0.0261299	-0.616159	0.212517	0.180726	0.224506	-0.411165	-0.127019	0.113304
300	522.925	243.637	276.34	241.621	527.119	97.862					1.34196	1.20087	0.210936	2.1075	0.762629	0.668054	1.04866	0.268254				289.151	482.546	454.76	344.353	1107.63	1275.49	484.776	301.19						-0.326072	-0.297687	-0.0597923	-0.606726	0.141457	0.271015	0.243981	-0.399109	-0.129117	0.115383
303	505.354	239.88	273.991	207.844	523.621	94.6545					1.26327	1.16693	0.200641	1.6731	0.750933	0.613382	0.94471	0.214661				283.652	504.109	460.966	321.752	1168.38	1135.97	471.998	276.79						-0.338888	-0.266304	-0.0469615	-0.632538	0.204063	0.131982	0.211192	-0.447788	-0.148155	0.113125
306	505.766	236.579	270.367	169.377	453.434	95.8894					1.26512	1.13711	0.184762	1.17837	0.516235	0.634431	0.819338	0.178639				302.218	515.352	460.315	324.444	1148.31	1219.47	484.42	288.261						-0.295616	-0.24994	-0.0483064	-0.629464	0.183377	0.215188	0.243068	-0.424903	-0.125824	0.115056
309	502.577	246.279	282.457	160.191	441.571	88.3812					1.25083	1.22473	0.237741	1.06023	0.476567	0.506454	0.792759	0.178696				285.793	502.609	471.094	325.36	1075.54	1245.67	471.408	298.613						-0.333899	-0.268488	-0.026022	-0.628417	0.108383	0.241303	0.209678	-0.40425	-0.137714	0.112186
312	495.679	246.435	272.669	179.09	446.842	96.5923					1.21994	1.22614	0.19485	1.30329	0.494194	0.646412	0.847471	0.189828				290.176	512.036	492.325	303.86	1129.31	1272.44	495.007	282.88						-0.323683	-0.254766	0.0178742	-0.652972	0.163798	0.267973	0.270236	-0.435638	-0.118397	0.122887
315	489.023	249.789	256.269	156.928	427.395	99.936					1.19013	1.25644	0.122983	1.01827	0.429163	0.703405	0.786731	0.183696				282.674	520.83	475.335	316.147	1122.52	1285.96	484.415	286.654						-0.341169	-0.241967	-0.0172534	-0.63894	0.156798	0.28145	0.243056	-0.428108	-0.123267	0.120125
318	491.151	249.564	265.312	180.333	410.144	95.457					1.19966	1.25441	0.162611	1.31927	0.371477	0.627061	0.822416	0.204341				283.451	544.792	498.476	294.189	1102.1	1259.72	457.133	290.718						-0.339356	-0.207092	0.0305915	-0.664016	0.135753	0.2553	0.173047	-0.420001	-0.129472	0.116171
321	519.166	233.886	265.529	180.19	428.415	89.958					1.32513	1.11278	0.163562	1.31744	0.432575	0.53333	0.814136	0.204231				288.111	543.3	484.137	306.223	1111.13	1279.46	453.323	288.738						-0.328496	-0.209264	0.000944995	-0.650273	0.145062	0.274975	0.16327	-0.423951	-0.128466	0.115386
324	489.855	248.732	271.687	164.582	372.727	86.6691					1.19386	1.24689	0.190546	1.11671	0.24636	0.477271	0.745272	0.2016				283.777	522.76	496.809	295.273	1107.17	1257.71	427.536	291.999						-0.338597	-0.239159	0.0271441	-0.662779	0.140986	0.253297	0.0970986	-0.417446	-0.142432	0.113176
327	476.616	252.058	276.122	180.39	420.502	94.4616					1.13457	1.27694	0.209979	1.32001	0.406116	0.610094	0.826284	0.195364				280.716	552.703	501.749	299.061	1142.09	1273.78	435.186	298.815						-0.345731	-0.195579	0.0373583	-0.658453	0.176963	0.269307	0.11673	-0.403848	-0.125407	0.115533
330	480.431	242.673	276.771	180.714	426.02	92.3245					1.15165	1.19216	0.212823	1.32418	0.424567	0.573667	0.813174	0.190448				273.592	572.462	514.179	311.976	1106.13	1252.15	424.436	298.015						-0.362335	-0.16682	0.0630561	-0.643703	0.139914	0.247753	0.0891447	-0.405442	-0.129804	0.111479
333	489.501	250.928	256.195	171.917	430.725	96.3693					1.19227	1.26673	0.12266	1.21104	0.440301	0.642611	0.812602	0.196015				292.438	565.597	507.601	296.157	1118.75	1226.23	424.035	279.486						-0.31841	-0.176812	0.0494566	-0.66177	0.152918	0.221923	0.0881144	-0.442408	-0.135873	0.11192
336	511.469	247.817	260.215	169.535	417.613	92.5905					1.29066	1.23863	0.140276	1.1804	0.396454	0.578201	0.804103	0.202074				285.894	538.866	497.439	303.307	1098.58	1237.04	421.853	297.962						-0.333663	-0.215718	0.0284469	-0.653603	0.132129	0.232695	0.0825152	-0.405548	-0.141593	0.109248
339	518.654	249.353	256.562	156.43	413.465	89.8665					1.32284	1.2525	0.124269	1.01185	0.382583	0.531771	0.770969	0.201721				293.407	588.123	517.961	317.738	1085.33	1210.1	414.008	283.315						-0.316152	-0.144027	0.0708766	-0.637122	0.118473	0.205852	0.0623847	-0.43477	-0.134311	0.106625
342	524.113	240.387	260.435	158.706	325.796	93.075					1.34729	1.17151	0.141237	1.04113	0.0894264	0.586459	0.729508	0.219875				297.583	611.114	512.239	289.197	1088.71	1202.91	425.069	285.982						-0.306419	-0.110566	0.0590458	-0.669718	0.121962	0.198687	0.0907685	-0.42945	-0.130711	0.109256
345	502.613	243.567	248.427	162.475	351.078	93.0384					1.25099	1.20024	0.0886185	1.08961	0.173968	0.585836	0.731543	0.213165				304.851	619.888	529.184	296.377	1063	1206.01	400.559	301.045						-0.289479	-0.0977952	0.0940797	-0.661518	0.0954614	0.201778	0.027873	-0.399398	-0.128625	0.105016
348	495.205	237.449	259.254	152.471	370.97	99.7541					1.21782	1.14497	0.136064	0.960944	0.240486	0.700304	0.733431	0.187679				314.695	613.09	524.56	312.209	1054.45	1202.99	404.433	298.88						-0.266536	-0.10769	0.0845197	-0.643437	0.0866545	0.198766	0.0378132	-0.403717	-0.126703	0.102365
351	495.323	260.81	259.93	165.804	321.866	96.3254					1.21835	1.356	0.139024	1.13242	0.0762855	0.641862	0.760656	0.228839				329.208	609.27	535.362	317.964	1063.5	1198.42	398.155	295.804						-0.23271	-0.113249	0.106853	-0.636865	0.0959761	0.194214	0.0217048	-0.409853	-0.121741	0.101841
354	428.777	239.525	258.287	155.909	361.207	88.9095					0.920315	1.16372	0.131828	1.00516	0.20784	0.515459	0.657387	0.177473				340.89	648.755	543.889	306.114	1033.7	1188.25	389.374	312.271						-0.205482	-0.0557817	0.124481	-0.650398	0.0652714	0.184083	-0.000828067	-0.377002	-0.114457	0.0999395
357	443.325	251.271	264.625	158.629	325.574	99.2633					0.985467	1.26983	0.1596	1.04014	0.0886857	0.691939	0.705944	0.198954				362.559	663.374	551.827	320.134	1015.79	1166.87	410.025	301.956						-0.154978	-0.034505	0.140894	-0.634386	0.0468158	0.162779	0.0521629	-0.39758	-0.10235	0.0993893
360	470.458	253.884	267.046	132.442	351.764	92.8199					1.10699	1.29344	0.170207	0.703345	0.176263	0.582111	0.672059	0.189913				405.398	750.408	565.633	321.63	1038.05	1187.81	400.075	300.248						-0.0551334	0.0921677	0.169436	-0.632678	0.069751	0.183644	0.0266325	-0.400987	-0.0683959	0.103785
363	453.423	258.325	264.351	146.174	349.85	94.9872					1.03069	1.33355	0.158399	0.879954	0.169862	0.619053	0.698586	0.193568				441.193	762.099	510.698	307.006	1014.25	1191.38	404.51	313.9						0.028295	0.109183	0.0558592	-0.649379	0.0452203	0.187204	0.0380108	-0.373751	-0.0699199	0.101476
366	446.387	256.076	264.896	159.812	338.894	90.2532					0.999184	1.31324	0.160788	1.05535	0.133226	0.538362	0.700025	0.202481				503.27	812.008	525.061	306.992	988.139	1164.3	392.851	303.968						0.172979	0.181823	0.0855549	-0.649395	0.0183153	0.160217	0.00809271	-0.393566	-0.0519975	0.107848
369	442.383	263.01	264.883	148.825	297.947	97.5923					0.98125	1.37587	0.16073	0.914051	-0.00369644	0.663457	0.681944	0.213472				555.567	802.942	522.461	300.473	971.7	1159.68	382.275	302.204						0.294867	0.168627	0.0801788	-0.65684	0.00137447	0.155607	-0.0190463	-0.397085	-0.0465395	0.113246
372	427.619	252.738	249.013	148.723	274.535	87.7011					0.91513	1.28308	0.0911882	0.912736	-0.0819834	0.494862	0.602503	0.215926				631.266	786.039	544.1	297.691	963.185	1127.75	382.927	291.619						0.4713	0.144026	0.124917	-0.660017	-0.00740026	0.12379	-0.0173717	-0.418203	-0.0298697	0.125181
375	425.617	257.362	264.542	129.457	310.811	92.4314					0.906163	1.32485	0.159237	0.664956	0.0393201	0.575489	0.61167	0.194232				689.072	766.003	546.686	297.305	957.611	1117.95	396.496	292.683						0.60603	0.114865	0.130263	-0.660459	-0.0131448	0.114027	0.0174464	-0.416081	-0.0133816	0.134882
378	390.929	234.75	256.589	144.805	302.065	92.4397					0.75081	1.12059	0.124384	0.862347	0.0100754	0.575631	0.573973	0.176383				731.117	796.041	536.013	299.785	983.385	1118.07	393.712	309.057						0.704025	0.158583	0.108198	-0.657626	0.0134161	0.114142	0.0103019	-0.383413	0.00845338	0.141719
381	406.234	244.81	238.09	138.701	283.732	83.1216					0.819355	1.21146	0.0433217	0.78384	-0.0512309	0.416804	0.537259	0.199978				757.818	804.237	525.489	317.976	952.457	1097.02	394.202	296.742						0.766258	0.170511	0.08644	-0.63685	-0.0184564	0.0931673	0.01156	-0.407983	0.00808087	0.146651
384	400.827	236.987	246.486	139.393	273.626	88.7806					0.79514	1.1408	0.0801125	0.792748	-0.0850247	0.513262	0.539506	0.190858				768.208	762.51	544.623	319.819	948.297	1101.71	410.264	306.067						0.790474	0.109781	0.125998	-0.634746	-0.0227432	0.0978436	0.0527769	-0.389378	0.0162509	0.147482
387	377.489	239.156	233.781	138.034	298.878	86.9717					0.690618	1.16039	0.024439	0.775271	-0.000582272	0.482429	0.522094	0.184603				765.594	777.729	535.653	296.62	931.475	1084.57	397.913	303.406						0.784382	0.131931	0.107454	-0.66124	-0.0400791	0.0807607	0.0210841	-0.394689	0.0037005	0.149146
390	360.4	218.433	241.601	148.768	263.984	90.4168					0.614083	0.97319	0.058708	0.913322	-0.117264	0.541151	0.497198	0.181214				767.944	765.51	535.182	307.633	925.394	1034.16	391.239	311.053						0.789859	0.114147	0.106481	-0.648663	-0.0463452	0.0305337	0.00395668	-0.379432	-0.00368295	0.147356
393	359.885	222.791	243.322	148.876	271.646	94.2569					0.611774	1.01256	0.0662499	0.9147	-0.0916446	0.606605	0.520041	0.182056				754.489	761.116	523.804	302.183	906.904	1051.88	392.863	299.961						0.758498	0.107753	0.0829565	-0.654887	-0.0654002	0.0481864	0.00812428	-0.401561	-0.0145412	0.145707
396	371.138	198.28	231.568	150.583	281.847	90.3757					0.662175	0.791144	0.0147416	0.936664	-0.0575328	0.54045	0.481274	0.168086				768.022	732.844	537.056	289.322	913.6	1032.98	388.337	314.293						0.79004	0.0666048	0.110355	-0.669575	-0.0585001	0.0293599	-0.00348911	-0.372968	-0.0135216	0.148267
399	346.138	194.513	227.532	148.313	282.059	94.9717					0.55021	0.757112	-0.00294263	0.90747	-0.0568232	0.618789	0.462302	0.16363				749.021	770.702	510.109	299.187	926.709	1030.66	393.299	317.367						0.745755	0.121704	0.0546421	-0.658309	-0.0449904	0.0270454	0.00924258	-0.366834	-0.0139681	0.142876
402	342.527	193.776	218.878	157.273	269.094	91.5932					0.534036	0.750452	-0.0408675	1.0227	-0.100179	0.561202	0.454557	0.180851				708.765	731.223	505.362	304.613	915.851	1009.16	396.806	322.014						0.651928	0.0642446	0.0448271	-0.652112	-0.0561797	0.00561428	0.0182432	-0.357565	-0.0351249	0.132146
405	352.053	205.448	229.503	151.733	265.588	92.2203					0.576698	0.855889	0.00569219	0.951451	-0.111901	0.571891	0.474953	0.17856				691.694	691.386	511.998	304.567	881.058	971.117	397.753	325.456						0.612141	0.00626482	0.0585474	-0.652165	-0.0920359	-0.0322905	0.020672	-0.350696	-0.0536954	0.127711
408	331.106	202.364	226.997	135.447	252.725	95.9168					0.482888	0.828034	-0.00528834	0.741993	-0.154913	0.634898	0.421269	0.166502				651.369	719.126	512.694	305.053	884.095	973.412	405.688	325.826						0.518155	0.0466383	0.0599859	-0.651609	-0.0889063	-0.0300034	0.0410345	-0.349959	-0.0568331	0.119968
411	348.765	187.791	219.579	139.042	242.913	91.5704					0.561972	0.696394	-0.0377922	0.788236	-0.187726	0.560814	0.396983	0.166103				618.359	685.58	493.173	294.388	878.772	967.642	394.202	330.194						0.441219	-0.00218571	0.0196266	-0.66379	-0.0943914	-0.0357534	0.0115616	-0.341245	-0.0831197	0.112375
414	336.805	205.05	211.621	147.906	214.796	88.8336					0.508408	0.852294	-0.0726654	0.90223	-0.281746	0.514165	0.403781	0.197458				582.577	642.916	492.516	305.533	881.331	966.5	401.735	339.138						0.357821	-0.0642797	0.0182693	-0.651062	-0.0917549	-0.0368914	0.0308897	-0.323401	-0.095051	0.10346
417	334.611	206.575	223.092	138.68	217.963	82.3995					0.498586	0.866077	-0.0223989	0.78358	-0.271156	0.404496	0.376531	0.182544				550.161	630.081	506.574	305.722	887.654	935.424	379.159	314.229						0.282269	-0.0829601	0.0473331	-0.650845	-0.0852381	-0.0678585	-0.02704	-0.373094	-0.119679	0.0990683
420	323.341	193.686	210.294	149.453	229.593	86.341					0.448109	0.749639	-0.07848	0.922126	-0.232266	0.471679	0.380135	0.185171				512.604	590.082	496.122	312.822	877.005	970.516	395.115	324.11						0.194732	-0.141176	0.0257238	-0.642737	-0.096213	-0.0328893	0.0139024	-0.353382	-0.129005	0.0919915
423	318.282	195.275	213.012	146.544	240.998	81.926					0.425455	0.763994	-0.0665726	0.884713	-0.194127	0.396425	0.368315	0.176329				478.077	570.914	484.553	323.195	887.975	976.554	391.589	333.478						0.114262	-0.169073	0.00180631	-0.630891	-0.0849075	-0.026873	0.00485507	-0.334693	-0.140689	0.0846521
426	308.995	185.605	218.244	136.876	248.041	82.2038					0.383863	0.676641	-0.043644	0.760367	-0.170578	0.40116	0.334635	0.153123				427.573	560.202	501.585	312.162	889.371	960.909	393.679	338.914						-0.00344843	-0.184664	0.0370195	-0.643491	-0.0834685	-0.0424623	0.0102192	-0.323846	-0.154268	0.0816052
429	304.209	185.93	225.139	150.664	220.27	84.3218					0.362427	0.67958	-0.0134311	0.937705	-0.263441	0.437262	0.356684	0.179807				370.583	540.226	474.497	314.506	863.342	933.646	388.517	332.721						-0.136277	-0.213739	-0.0189847	-0.640814	-0.110292	-0.0696297	-0.00302875	-0.336203	-0.191121	0.0747728
432	315.344	189.183	212.045	139.549	232.647	76.5503					0.412295	0.708964	-0.0708087	0.79475	-0.222051	0.304797	0.321324	0.16653				338.415	549.025	479.416	309.978	863.881	938.47	368.626	345.646						-0.211251	-0.200932	-0.00881539	-0.645985	-0.109737	-0.0648234	-0.0540692	-0.310417	-0.200754	0.0726396
435	322.158	184.317	216.016	150.985	225.062	76.0951					0.442811	0.665009	-0.0534094	0.941827	-0.247415	0.297038	0.340977	0.180745				316.554	471.114	462.3	302.721	888.229	940.264	377.285	339.026						-0.262203	-0.314326	-0.0442022	-0.654273	-0.0846457	-0.0630352	-0.0318506	-0.323624	-0.22227	0.0755022
438	309.997	186.231	211.194	149.958	195.165	80.9506					0.388347	0.682295	-0.0745357	0.928628	-0.347387	0.3798	0.326191	0.19242				281.207	372.719	460.015	304.907	905.791	927.347	389.571	334.26						-0.344588	-0.457534	-0.0489268	-0.651776	-0.0665476	-0.0759065	-0.000323829	-0.333131	-0.247342	0.0831336
441	322.225	185.925	212.955	145.552	223.661	79.4717					0.443113	0.67953	-0.0668202	0.871957	-0.252099	0.354592	0.338379	0.175611				282.736	374.855	465.998	319.166	896.098	876.397	381.782	335.376						-0.341024	-0.454425	-0.0365569	-0.635492	-0.0765363	-0.126678	-0.0203114	-0.330906	-0.252741	0.0789187
444	303.987	182.78	208.264	152.01	221.672	81.0475					0.361434	0.651126	-0.0873764	0.955013	-0.258751	0.381451	0.333816	0.184223				268.374	364.629	463.61	308.651	872.374	900.745	390.556	336.986						-0.374497	-0.469307	-0.0414946	-0.647501	-0.100985	-0.102415	0.00220506	-0.327694	-0.257711	0.0821835
447	330.562	182.439	210.766	143.474	229.551	74.2157					0.480452	0.648046	-0.0764125	0.845233	-0.232407	0.265004	0.321652	0.170737				254.615	377.047	486.384	308.53	882.533	884.331	389.681	355.443						-0.406565	-0.451235	0.0055898	-0.647638	-0.0905153	-0.118772	-4.10447e-05	-0.290871	-0.250006	0.0840128
450	314.304	181.261	204.383	157.713	214.137	75.5439					0.407638	0.637402	-0.104385	1.02836	-0.283947	0.287643	0.328784	0.196268				234.569	325.179	463.279	282.891	861.317	888.254	381.663	345.712						-0.453288	-0.526724	-0.0421782	-0.67692	-0.112379	-0.114863	-0.020615	-0.310285	-0.282157	0.087478
453	319.702	183.867	212.971	140.469	236.062	71.3272					0.431812	0.66094	-0.0667492	0.806585	-0.210632	0.215769	0.306287	0.16395				223.719	319.147	463.325	301.408	859.516	913.199	381.49	346.616						-0.478575	-0.535503	-0.0420828	-0.655772	-0.114236	-0.0900048	-0.0210602	-0.308481	-0.280714	0.0880296
456	326.494	169.188	206.347	147.666	244.304	73.9214					0.46223	0.528345	-0.0957772	0.899147	-0.183072	0.259987	0.31181	0.166153				210.883	326.207	452.36	306.25	853.508	885.178	371.597	342.296						-0.508491	-0.525228	-0.0647524	-0.650242	-0.120427	-0.117928	-0.0464463	-0.317101	-0.293827	0.084714
459	304.289	186.876	207.287	156.585	241.913	68.2441					0.362785	0.688124	-0.0916599	1.01386	-0.19107	0.163218	0.324209	0.189201				220.15	300.587	456.884	300.855	849.836	878.172	378.877	340.144						-0.486892	-0.562516	-0.055401	-0.656404	-0.124212	-0.124909	-0.0277652	-0.321394	-0.294937	0.0872822
462	319.091	178.619	203.885	142.881	246.961	76.2697					0.429078	0.613532	-0.106568	0.837599	-0.174188	0.300014	0.316578	0.16253				215.751	312.006	447.705	312.258	854.617	863.849	371.464	347.538						-0.497146	-0.545897	-0.0743767	-0.64338	-0.119284	-0.139183	-0.0467871	-0.306641	-0.296587	0.083531
465	313.119	180.396	212.821	157.444	248.117	74.1837					0.40233	0.629589	-0.0674074	1.0249	-0.170323	0.264458	0.347257	0.181534				218.043	342.266	434.686	311.124	841.931	893.2	377.122	333.352						-0.491804	-0.501856	-0.101293	-0.644676	-0.132357	-0.109934	-0.0322697	-0.334944	-0.293642	0.0815724
468	332.794	183.369	201.462	144.615	265.019	72.9881					0.490448	0.656441	-0.117182	0.859902	-0.113805	0.244079	0.336647	0.165041				229.646	353.611	433.423	307.057	854.203	865.673	373.012	349.386						-0.46476	-0.485343	-0.103906	-0.64932	-0.119711	-0.137364	-0.0428156	-0.302955	-0.288272	0.0786019
471	330.127	190.011	200.002	151.617	269.863	70.5466					0.478502	0.716444	-0.12358	0.949955	-0.0976074	0.202464	0.354363	0.178608				279.402	372.189	454.195	312.53	841.235	902.941	392.692	353.198						-0.348793	-0.458304	-0.0609592	-0.64307	-0.133075	-0.100227	0.00768624	-0.295349	-0.254011	0.0788109
474	318.99	179.78	214.875	150.899	258.451	70.1188					0.428623	0.624026	-0.0584093	0.940722	-0.135767	0.195172	0.332394	0.16883				283.695	391.814	434.384	312.556	838.885	841.828	376.264	345.924						-0.338788	-0.429742	-0.101918	-0.64304	-0.135497	-0.161126	-0.0344704	-0.309861	-0.269305	0.0712971
477	346.761	190.726	208.098	147.393	249.646	69.351					0.553	0.722904	-0.088106	0.895636	-0.16521	0.182085	0.350051	0.179217				261.471	400.137	433.887	290.3	848.917	861.846	376.452	355.89						-0.390587	-0.417628	-0.102945	-0.668459	-0.125159	-0.141178	-0.0339867	-0.289979	-0.27124	0.0751992
480	338.958	187.072	213.18	161.091	264.342	72.8035					0.518051	0.689892	-0.065836	1.0718	-0.116069	0.240933	0.389796	0.187732				252.661	424.2	441.821	325.342	868.942	848.722	383.647	349.977						-0.411119	-0.382605	-0.0865422	-0.628438	-0.104522	-0.154256	-0.0155254	-0.301776	-0.260598	0.0732619
483	345.647	201.061	206.891	160.448	271.49	71.9488					0.548009	0.81626	-0.0933943	1.06353	-0.0921662	0.226364	0.411434	0.19583				246.408	434.38	440.947	294.322	873.299	871.059	388.246	364.937						-0.425693	-0.367789	-0.0883492	-0.663865	-0.100031	-0.131998	-0.00372262	-0.271929	-0.256672	0.0778448
486	336.374	185.426	203.348	159.365	269.34	77.6079					0.506479	0.675022	-0.10892	1.04961	-0.0993549	0.322823	0.390942	0.184642				219.624	458.69	448.94	311.661	869.141	837.957	373.683	361.897						-0.488118	-0.332409	-0.0718246	-0.644063	-0.104316	-0.164983	-0.0410929	-0.277995	-0.2656	0.0757644
489	353.406	199.404	201.949	164.624	273.913	73.362					0.582758	0.801298	-0.11505	1.11724	-0.084065	0.250452	0.425439	0.202233				239.257	455.469	435.386	309.838	860.625	851.287	368.003	360.826						-0.442361	-0.337096	-0.0998463	-0.646144	-0.113093	-0.1517	-0.0556681	-0.280132	-0.265755	0.0718578
492	351.2	203.367	209.043	167.679	277.175	65.277					0.57288	0.837091	-0.083965	1.15653	-0.0731568	0.112644	0.420336	0.21067				217.144	479.836	449.113	310.604	857.455	851.481	367.527	372.622						-0.4939	-0.301632	-0.0714661	-0.645269	-0.116359	-0.151507	-0.0568893	-0.256599	-0.261703	0.0748887
495	347.385	205.758	200.787	164.668	275.964	68.7395					0.555794	0.858696	-0.120141	1.11781	-0.077205	0.171662	0.41777	0.208042				200.681	477.535	433.234	305.605	843.076	851.208	381.509	374.341						-0.53227	-0.304981	-0.104297	-0.650979	-0.131178	-0.151779	-0.0210107	-0.253169	-0.268708	0.0777042
498	342.888	202.69	208.593	173.484	279.941	63.4616					0.535653	0.830981	-0.0859338	1.23119	-0.0639076	0.0817003	0.421615	0.21946				206.762	489.752	459.38	306.375	862.687	871.549	394.344	386.508						-0.518096	-0.287199	-0.0502393	-0.650099	-0.110968	-0.131509	0.0119254	-0.228894	-0.245635	0.0818874
501	357.24	206.336	208.609	159.421	275.416	65.5859					0.59993	0.863918	-0.0858659	1.05032	-0.0790361	0.117909	0.411196	0.201864				208.004	518.941	437.961	310.062	853.337	821.797	388.161	375.875						-0.515201	-0.244716	-0.0945221	-0.645889	-0.120604	-0.181086	-0.00394228	-0.250109	-0.257009	0.0771021
504	370.034	212.518	206.088	159.376	292.83	74.1344					0.657231	0.919754	-0.0969109	1.04975	-0.0208072	0.263618	0.462105	0.198153				198.438	542.972	442.897	330.209	861.55	828.95	366.143	382.335						-0.537498	-0.209741	-0.0843178	-0.62288	-0.11214	-0.173958	-0.0604418	-0.23722	-0.254775	0.0745782
507	383.659	212.563	205.861	165.201	268.19	72.6298					0.718252	0.920169	-0.0979087	1.12467	-0.1032	0.237972	0.466658	0.215848				224.995	539.516	434.814	312.015	849.234	817.126	387.108	396.94						-0.475601	-0.214771	-0.101028	-0.643658	-0.124831	-0.185741	-0.0066431	-0.208082	-0.245045	0.0743875
510	363.027	208.383	205.297	168.985	284.083	66.9159					0.62585	0.882408	-0.100377	1.17333	-0.0500572	0.140579	0.445288	0.215227				202.461	586.131	440.4	331.637	854.264	807.935	383.874	406.113						-0.52812	-0.146926	-0.0894809	-0.621249	-0.119648	-0.1949	-0.0149429	-0.189782	-0.238131	0.0766888
513	383.879	217.732	210.382	173.227	293.877	69.5695					0.719234	0.966863	-0.0780961	1.22789	-0.0173068	0.185809	0.500733	0.223336				217.583	578.346	445.066	310.059	858.514	820.438	381.502	389.519						-0.492875	-0.158257	-0.0798341	-0.645892	-0.115269	-0.182441	-0.0210286	-0.222887	-0.239811	0.0765485
516	378.931	212.653	216.994	166.681	307.71	73.553					0.697077	0.920975	-0.0491224	1.1437	0.0289493	0.253708	0.499215	0.201204				229.316	577.428	427.564	323.683	857.081	880.115	372.909	400.019						-0.46553	-0.159593	-0.116019	-0.630332	-0.116745	-0.122973	-0.0430781	-0.201939	-0.232026	0.0724156
519	392.168	233.665	217.098	173.354	299.994	70.6353					0.756358	1.11079	-0.0486641	1.22952	0.00314784	0.203976	0.542521	0.230627				231.208	589.44	432.893	314.159	843.475	872.097	378.153	384.779						-0.461121	-0.142111	-0.105001	-0.64121	-0.130766	-0.130963	-0.0296238	-0.232343	-0.234142	0.0738645
522	386.991	224.648	222.465	176.779	304.387	63.7139					0.733172	1.02933	-0.0251482	1.27356	0.0178379	0.0860008	0.519126	0.231691				240.827	531.39	423.798	298.501	848.469	857.314	383.86	369.335						-0.438701	-0.226599	-0.123804	-0.659092	-0.12562	-0.145694	-0.0149773	-0.263155	-0.249705	0.0733382
525	382.171	215.651	227.007	177.685	291.758	70.0832					0.711588	0.948058	-0.00524409	1.28523	-0.0243911	0.194565	0.5183	0.222384				228.803	574.239	425.583	309.549	850.691	854.162	384.415	373.213						-0.466725	-0.164235	-0.120115	-0.646475	-0.12333	-0.148835	-0.0135541	-0.255418	-0.242336	0.0744184
528	388.739	235.934	223.541	179.603	312.821	60.4433					0.741003	1.13128	-0.0204336	1.30988	0.0460393	0.0302535	0.539671	0.244994				227.72	541.927	417.266	323.037	843.488	824.237	380.551	394.466						-0.469249	-0.211262	-0.137309	-0.631071	-0.130753	-0.178655	-0.0234698	-0.213018	-0.249348	0.0706444
531	400.393	235.336	218.023	183.999	319.807	64.0027					0.793196	1.12589	-0.0446115	1.36643	0.0693994	0.0909233	0.56687	0.24839				220.52	547.692	430.863	302.13	853.654	845.899	381.624	406.303						-0.486031	-0.202873	-0.109198	-0.654948	-0.120277	-0.157069	-0.0207166	-0.189402	-0.242564	0.075947
534	379.943	240.013	215.689	175.519	306.568	68.7294					0.701607	1.16813	-0.0548384	1.25736	0.0251309	0.17149	0.544813	0.237336				206.274	547.814	437.984	336.349	846.163	856.259	375.809	393.836						-0.519233	-0.202694	-0.094476	-0.615868	-0.127996	-0.146746	-0.0356379	-0.214275	-0.244616	0.0738378
537	400.856	234.911	222.719	196.378	332.53	73.1655					0.795268	1.12204	-0.0240352	1.52563	0.111947	0.247103	0.62966	0.252608				217.158	539.15	432.01	326.933	842.344	859.209	378.399	384.668						-0.493867	-0.215304	-0.106826	-0.626622	-0.131932	-0.143805	-0.0289905	-0.232565	-0.247489	0.0728665
540	424.483	233.087	230.356	192.676	298.317	73.6764					0.901086	1.10557	0.00942921	1.47803	-0.0024602	0.255811	0.624577	0.254542				213.004	532.967	459.607	323.014	847.975	857.419	394.243	365.305						-0.50355	-0.224302	-0.04977	-0.631097	-0.126129	-0.145589	0.0116657	-0.271196	-0.242496	0.0784889
543	403.864	242.38	234.976	185.928	313.125	70.4616					0.80874	1.18951	0.0296765	1.39124	0.0470565	0.201015	0.611206	0.245398				209.689	533.498	444.806	318.563	844.797	819.163	381.661	379.617						-0.511274	-0.223531	-0.0803706	-0.63618	-0.129404	-0.183711	-0.0206219	-0.242641	-0.253467	0.0754018
546	407.757	238.031	229.968	199.357	340.03	66.2322					0.826173	1.15023	0.00772897	1.56394	0.137023	0.128925	0.635671	0.262203				207.728	529.844	454.031	318.914	849.511	828.894	375.186	372.514						-0.515846	-0.228848	-0.061298	-0.635779	-0.124546	-0.174014	-0.0372356	-0.256813	-0.254297	0.0758565
549	405.515	251.287	229.098	187.253	344.728	65.8857					0.816136	1.26997	0.00391703	1.40827	0.152736	0.123019	0.629009	0.253423				221.106	535.333	434.466	322.157	836.138	830.255	370.267	372.831						-0.484665	-0.22086	-0.101749	-0.632075	-0.138327	-0.172659	-0.0498587	-0.256181	-0.257047	0.0709661
552	423.022	242.157	242.567	195.361	324.994	69.7468					0.894539	1.1875	0.0629406	1.51255	0.0867452	0.188831	0.655518	0.256066				230.6	548.779	430.213	299.476	853.063	832.977	367.941	373.847						-0.462536	-0.20129	-0.110542	-0.657979	-0.120886	-0.169945	-0.0558288	-0.254154	-0.254145	0.0724694
555	405.722	234.718	226.546	185.887	354.144	70.0859					0.817062	1.1203	-0.00726377	1.3907	0.184219	0.194611	0.616605	0.234334				229.922	555.533	452.759	342.929	842.273	854.182	376.976	374.87						-0.464118	-0.19146	-0.0639287	-0.608352	-0.132005	-0.148815	-0.0326433	-0.252112	-0.236679	0.0710008
558	417.469	239.464	236.95	198.73	356.997	65.3144					0.869669	1.16317	0.0383249	1.55588	0.19376	0.113281	0.655682	0.258354				236.104	526.063	437.879	325.514	849.205	864.414	382.827	381.25						-0.44971	-0.234351	-0.0946931	-0.628242	-0.124862	-0.138619	-0.0176286	-0.239385	-0.240936	0.0718174
561	417.75	242.728	237.513	196.657	345.972	66.3236					0.870928	1.19266	0.0407928	1.52922	0.156894	0.130483	0.653496	0.258227				239.194	535.595	440.94	321.834	843.832	841.099	353.729	366.829						-0.442508	-0.220479	-0.0883631	-0.632444	-0.130399	-0.161852	-0.0922968	-0.268156	-0.254562	0.0678008
564	422.497	239.97	233.476	188.029	333.521	75.4918					0.89219	1.16774	0.0231016	1.41826	0.11526	0.286755	0.650551	0.239988				241.336	562.625	447.728	325.923	831.235	847.306	387.288	345.904						-0.437514	-0.181137	-0.0743306	-0.627775	-0.143381	-0.155667	-0.00618274	-0.309901	-0.241986	0.0727354
567	417.994	251.898	231.008	203.388	341.767	68.574					0.872024	1.27549	0.0122876	1.61579	0.142835	0.168841	0.681212	0.274642				250.936	541.91	435.349	322.162	860.96	824.492	374.173	362.773						-0.415139	-0.211286	-0.0999234	-0.632069	-0.112748	-0.178401	-0.0398361	-0.276246	-0.245706	0.068913
570	418.887	240.07	230.941	186.768	358.325	73.9022					0.876021	1.16865	0.0119953	1.40204	0.1982	0.25966	0.652761	0.23446				255.409	565.255	440.019	308.968	854.694	851.713	367.32	366.657						-0.404714	-0.177309	-0.090268	-0.647138	-0.119205	-0.151275	-0.0574223	-0.268498	-0.239479	0.0701847
573	409.807	242.909	234.089	192.644	338.974	73.0823					0.835356	1.19429	0.02579	1.47761	0.133492	0.245685	0.652038	0.247347				275.295	572.955	423.486	321.574	859.585	840.986	375.172	364.408						-0.358365	-0.166103	-0.124449	-0.632741	-0.114164	-0.161965	-0.0372728	-0.272986	-0.233506	0.0669277
576	426.345	250.636	242.352	196.251	338.484	76.3382					0.909424	1.26409	0.0619971	1.524	0.131854	0.301181	0.698758	0.253635				279.763	555.43	439.199	334.662	850.622	852.721	374.592	380.902						-0.347952	-0.19161	-0.0919644	-0.617794	-0.123401	-0.150271	-0.0387604	-0.240078	-0.225229	0.0653338
579	415.829	251.489	237.117	198.94	368.601	67.2239					0.862324	1.2718	0.0390584	1.55859	0.232562	0.145829	0.685026	0.261507				277.075	576.411	438.219	321.545	840.703	853.439	396.881	366.869						-0.354216	-0.161073	-0.0939899	-0.632774	-0.133623	-0.149556	0.0184356	-0.268075	-0.221859	0.070623
582	433.024	250.628	239.227	209.552	339.902	74.6846					0.939335	1.26402	0.0483046	1.69507	0.136596	0.272996	0.726053	0.27604				283.233	589.213	423.55	328.914	847.304	860.199	399.828	363.345						-0.339865	-0.14244	-0.124317	-0.624358	-0.12682	-0.142819	0.0259964	-0.275106	-0.218716	0.0695934
585	441.598	250.652	243.669	199.221	369.421	74.8519					0.977733	1.26424	0.0677709	1.5622	0.235306	0.275848	0.730516	0.253565				295.958	577.12	444.661	329.458	861.061	838.033	380.971	380.603						-0.310206	-0.160041	-0.0806716	-0.623737	-0.112643	-0.164907	-0.0223925	-0.240676	-0.214409	0.0665388
588	430.496	247.266	246.027	200.128	337.137	68.628					0.928013	1.23365	0.0781029	1.57387	0.127352	0.169761	0.685124	0.264255				308.902	574.514	421.257	335.853	853.241	845.77	378.485	371.702						-0.280037	-0.163833	-0.129059	-0.616433	-0.120702	-0.157198	-0.0287708	-0.258434	-0.219308	0.0632505
591	419.616	246.664	233.263	191.683	345.986	75.0192					0.879286	1.22821	0.0221718	1.46524	0.156941	0.278699	0.671758	0.246564				302.757	596.716	428.02	319.036	829.492	843.751	383.991	356.848						-0.29436	-0.131521	-0.115075	-0.63564	-0.145176	-0.15921	-0.0146409	-0.288067	-0.222961	0.0672353
594	443.013	246.023	249.213	207.211	379.761	71.6069					0.98407	1.22242	0.0920637	1.66496	0.269882	0.220537	0.742323	0.261948				320.997	612.225	434.921	313.04	839.527	846.066	368.54	365.392						-0.251848	-0.108949	-0.100807	-0.642487	-0.134835	-0.156902	-0.0542901	-0.271022	-0.215143	0.0664344
597	424.134	260.211	243.256	189.626	339.076	65.5					0.899519	1.35058	0.0659616	1.43879	0.133836	0.116445	0.667523	0.262402				313.903	615.965	420.629	325.65	854.043	832.073	379.216	358.14						-0.268382	-0.103506	-0.130356	-0.628087	-0.119876	-0.170847	-0.0268958	-0.285491	-0.21668	0.0660646
600	442.465	262.7	245.157	197.227	351.964	77.681					0.981618	1.37308	0.074291	1.53656	0.176931	0.324069	0.744424	0.259921				319	597.443	419.269	326.597	851.049	809.509	366.535	367.183						-0.256502	-0.130463	-0.133168	-0.627005	-0.122961	-0.193332	-0.0594362	-0.267449	-0.22379	0.0627619
603	431.894	256.063	247.426	200.307	366.537	71.3702					0.934273	1.31312	0.084233	1.57617	0.22566	0.216502	0.724993	0.260299				311.122	655.168	430.196	342.966	834.881	816.184	371.508	382.22						-0.274864	-0.0464483	-0.110577	-0.608311	-0.139623	-0.186679	-0.0466745	-0.237449	-0.206328	0.0644081
606	409.799	263.714	250.125	204.834	355.41	71.6389					0.83532	1.38223	0.0960623	1.63439	0.188455	0.221082	0.726257	0.271323				327.214	628.322	415.296	336.021	843.282	827.251	376.859	353.215						-0.237357	-0.0855198	-0.141382	-0.616242	-0.130965	-0.175652	-0.0329441	-0.295317	-0.214422	0.0643487
609	416.712	256.582	243.638	196.716	365.73	76.1161					0.866281	1.3178	0.0676351	1.52998	0.222963	0.297396	0.71701	0.250732				335.283	638.982	423.919	333.244	854.558	820.47	373.451	366.818						-0.218551	-0.070005	-0.123554	-0.619413	-0.119345	-0.182409	-0.0416893	-0.268177	-0.205393	0.0648194
612	415.44	265.485	247.229	206.954	344.381	80.2751					0.860584	1.39823	0.083371	1.66166	0.151573	0.368286	0.753951	0.271519				328.24	652.635	418.613	325.804	843.96	817.234	380.681	372.154						-0.234966	-0.050135	-0.134526	-0.627911	-0.130267	-0.185633	-0.0231359	-0.257532	-0.205513	0.0668812
615	414.57	267.649	250.674	197.944	330.233	80.3967					0.856689	1.41778	0.0984654	1.54578	0.104263	0.370358	0.732222	0.26295				328.702	645.409	432.192	345.168	827.909	845.723	366.336	365.585						-0.233891	-0.0606513	-0.106449	-0.605796	-0.146808	-0.157244	-0.0599458	-0.270637	-0.205178	0.0631094
618	423.623	267.774	255.961	204.327	342.807	84.3985					0.897232	1.41891	0.121635	1.62786	0.146309	0.438569	0.775085	0.264087				343.532	672.35	437.613	344.41	843.992	833.59	383.176	365.634						-0.199325	-0.0214414	-0.0952422	-0.606661	-0.130234	-0.169335	-0.016733	-0.27054	-0.188689	0.0670259
621	425.259	266.9	254.258	198.836	352.807	77.9442					0.904561	1.41101	0.114171	1.55725	0.179748	0.328556	0.749216	0.259458				342.744	703.581	444.857	345.961	840.349	843.764	375.993	364.708						-0.201161	0.0240134	-0.0802653	-0.60489	-0.133988	-0.159197	-0.0351668	-0.272387	-0.18288	0.0687312
624	420.987	253.319	256.953	205.64	360.847	82.8117					0.885428	1.28833	0.12598	1.64475	0.206635	0.411522	0.760441	0.252143				345.447	716.822	443.171	349.229	842.733	846.384	383.835	368.294						-0.194861	0.0432853	-0.0837519	-0.601158	-0.131531	-0.156586	-0.0150432	-0.265232	-0.17561	0.0699404
627	422.298	253.562	250.447	196.935	343.777	86.2322					0.891299	1.29052	0.0974707	1.5328	0.149554	0.469824	0.738578	0.244196				343.349	728.641	447.178	346.157	850.06	829.349	384.216	357.203						-0.199751	0.0604874	-0.0754665	-0.604666	-0.12398	-0.173561	-0.0140637	-0.287359	-0.177295	0.0721698
630	409.681	270.338	261.436	189.15	346.332	85.0996					0.834793	1.44207	0.145626	1.43267	0.158099	0.450519	0.743963	0.242024				347.278	737.612	431.327	340.314	845.515	843.728	400.202	361.868						-0.190594	0.0735442	-0.108238	-0.611339	-0.128664	-0.159233	0.0269566	-0.278052	-0.171952	0.0744736
633	432.709	263.763	260.576	201.353	362.014	73.3583					0.937923	1.38267	0.141858	1.58961	0.210537	0.250389	0.752166	0.261469				347.898	700.398	444.711	327.104	852.327	843.622	387.24	373.534						-0.18915	0.0193812	-0.080568	-0.626425	-0.121645	-0.159338	-0.0063036	-0.254779	-0.177353	0.0717831
636	416.89	268.989	262.002	200.049	359.158	80.6554					0.867079	1.42988	0.148104	1.57285	0.200985	0.374768	0.765612	0.255347				358.014	728.992	437.988	332.717	867.926	863.338	382.75	369.015						-0.165572	0.0609973	-0.0944661	-0.620015	-0.105568	-0.139691	-0.0178264	-0.263793	-0.168242	0.0730212
639	403.787	256.216	251.254	195.974	367.045	85.8995					0.808397	1.3145	0.101008	1.52043	0.227361	0.464153	0.739309	0.237417				344.289	733.177	436.779	331.594	840.278	825.829	396.305	383.401						-0.19756	0.067089	-0.0969665	-0.621298	-0.134061	-0.177068	0.016956	-0.235093	-0.17225	0.0739769
642	406.469	261.324	271.221	194.474	361.811	79.2633					0.820405	1.36064	0.188506	1.50115	0.209859	0.35104	0.738599	0.23857				345.762	771.066	436.516	316.923	848.02	881.296	391.477	379.837						-0.194128	0.122234	-0.0975098	-0.638053	-0.126082	-0.121796	0.00456792	-0.242203	-0.161621	0.0790218
645	430.639	267.401	263.503	202.852	357.1	83.7623					0.928653	1.41554	0.154685	1.6089	0.194105	0.427725	0.788267	0.256324				343.274	757.226	446.551	359.932	856.714	861.961	405.003	359.934						-0.199927	0.102091	-0.0767622	-0.588934	-0.117123	-0.141063	0.0392762	-0.281911	-0.158044	0.0753491
648	419.81	273.049	258.139	196.182	357.64	79.9177					0.880157	1.46656	0.131176	1.52311	0.195909	0.362194	0.759851	0.256116				350.019	790.898	440.144	358.428	839.272	887.044	399.559	358.616						-0.184205	0.151097	-0.0900104	-0.590651	-0.135098	-0.116068	0.0253069	-0.28454	-0.153021	0.0778891
651	420.264	273.696	260.069	210.709	337.267	83.0027					0.882189	1.4724	0.139635	1.70994	0.127785	0.414778	0.791122	0.278254				347.138	759.405	432.27	338.683	861.546	877.303	399.958	383.389						-0.19092	0.105263	-0.106288	-0.613202	-0.112144	-0.125775	0.0263302	-0.235117	-0.156482	0.0759842
654	406.797	268.85	275.347	200.558	363.307	81.8684					0.821874	1.42863	0.206584	1.57939	0.214862	0.395443	0.774464	0.248823				345.353	776.138	446.368	349.142	858.867	854.434	401.334	386.443						-0.19508	0.129616	-0.0771418	-0.601257	-0.114904	-0.148564	0.0298607	-0.229025	-0.150812	0.0766464
657	432.083	263.87	271.811	202.465	359.094	79.1764					0.935123	1.38364	0.191089	1.60392	0.200771	0.349558	0.77735	0.253958				374.239	789.643	445.472	343.247	847.489	869.107	400.049	369.212						-0.127756	0.149271	-0.0789949	-0.60799	-0.12663	-0.133942	0.0265653	-0.263401	-0.14536	0.0790029
660	420.57	260.124	272.503	203.401	341.649	86.9488					0.88356	1.3498	0.194124	1.61596	0.142438	0.482039	0.777988	0.249848				421.396	773.847	438.89	326.726	833.369	879.839	405.926	372.168						-0.0178471	0.126282	-0.092603	-0.626857	-0.141181	-0.123248	0.0416457	-0.257503	-0.136414	0.081513
663	415.333	270.328	263.466	190.476	351.329	82.4406					0.860103	1.44198	0.154519	1.44973	0.174808	0.405197	0.747723	0.243918				435.905	784.651	415.82	333.194	848.495	897.143	405.387	375.285						0.0159701	0.142006	-0.140298	-0.619471	-0.125593	-0.106005	0.0402626	-0.251284	-0.130552	0.0822968
666	401.95	255.346	263.923	200.656	332.429	86.4095					0.800166	1.30665	0.156525	1.58065	0.111608	0.472846	0.738074	0.247526				464.087	804.417	421.991	325.633	841.236	852.582	424.803	358.178						0.0816548	0.170773	-0.12754	-0.628106	-0.133073	-0.15041	0.090087	-0.285414	-0.122754	0.0902354
669	406.75	263.117	259.084	199.161	346.558	82.9406					0.821664	1.37684	0.135321	1.56142	0.158855	0.413719	0.744636	0.25144				515.209	797.43	426.9	328.824	838.448	860.795	440.035	376.046						0.200806	0.160604	-0.117392	-0.624461	-0.135947	-0.142225	0.129173	-0.249767	-0.0974011	0.0955933
672	419.779	258.396	261.06	193.825	354.354	85.5932					0.880018	1.33419	0.143976	1.4928	0.184923	0.458933	0.74914	0.23673				566.452	800.444	432.805	334.812	849.065	861.234	438.648	365.401						0.320237	0.164992	-0.105182	-0.617623	-0.125006	-0.141788	0.125614	-0.271004	-0.08122	0.103032
675	406.627	274.456	262.565	196.042	357.593	84.6042					0.821116	1.47927	0.150575	1.5213	0.195753	0.442075	0.768349	0.251071				432.945	790.404	429.233	339.977	825.805	856.614	438.087	379.464						0.00907054	0.15038	-0.112568	-0.611724	-0.148976	-0.146392	0.124173	-0.242947	-0.122373	0.0853396
678	405.175	265.052	254.811	201.328	344.718	86.308					0.814611	1.39432	0.116594	1.58929	0.1527	0.471116	0.756439	0.255554				480.611	738.521	440.877	340.438	835.247	869.757	423.963	362.703						0.120168	0.0748667	-0.0884933	-0.611198	-0.139246	-0.133295	0.0879304	-0.276386	-0.120707	0.0851633
681	399.639	271.907	256.333	193.536	345.529	87.1344					0.789817	1.45624	0.123264	1.48908	0.155412	0.485202	0.749837	0.249202				508.885	766.09	439.244	332.244	818.268	872.669	435.623	366.188						0.186067	0.114992	-0.0918705	-0.620555	-0.156743	-0.130393	0.11785	-0.269435	-0.106261	0.0924948
684	394.171	262.092	259.111	204.387	341.637	95.7514					0.765331	1.36758	0.135436	1.62864	0.142397	0.632079	0.778577	0.252291				421.981	750.854	425.751	334.641	819.448	844.704	435.953	357.504						-0.0164832	0.0928161	-0.119768	-0.617818	-0.155527	-0.15826	0.118699	-0.286759	-0.142887	0.0831468
687	414.963	280.825	254.432	190.063	344.856	85.8793					0.858449	1.53681	0.114934	1.44441	0.153164	0.463809	0.761929	0.255187				414.9	759.512	424.201	328.076	820.986	873.841	444.81	365.128						-0.032987	0.105417	-0.122971	-0.625316	-0.153942	-0.129225	0.141427	-0.271548	-0.136143	0.084958
690	399.651	276.651	250.459	199.681	353.156	85.5841					0.789873	1.49909	0.0975251	1.56812	0.180917	0.458777	0.765718	0.262358				424.894	718.33	432.144	321.339	826.667	879.072	429.363	352.687						-0.00969312	0.04548	-0.10655	-0.63301	-0.148088	-0.124012	0.101787	-0.296369	-0.146307	0.08221
693	397.695	262.772	266.109	199.537	338.819	88.5393					0.781111	1.37372	0.166104	1.56626	0.132975	0.509149	0.754887	0.247373				429.807	730.378	421.438	337.811	852.171	866.259	441.12	352.678						0.00175745	0.0630157	-0.128683	-0.614198	-0.121805	-0.136781	0.131958	-0.296388	-0.137641	0.0829175
696	401.289	269.142	247.389	195.435	349.384	94.2587					0.797208	1.43126	0.08407	1.5135	0.168303	0.606636	0.76683	0.248326				436.415	737.17	427.121	332.418	831.802	845.152	451.976	354.943						0.0171583	0.0728999	-0.116935	-0.620357	-0.142796	-0.157814	0.159815	-0.291868	-0.134987	0.0860208
699	413.557	276.205	258.356	208.159	339.752	89.2029					0.852149	1.49507	0.132127	1.67715	0.136095	0.52046	0.802174	0.272039				430.437	737.219	426.295	347.822	837.113	862.109	424.018	363.383						0.00322487	0.0729718	-0.118643	-0.602764	-0.137323	-0.140916	0.0880718	-0.275029	-0.138801	0.0791386
702	414.577	268.039	260.964	212.033	331.178	82.0146					0.856719	1.42131	0.143559	1.72698	0.107424	0.397935	0.775654	0.277921				439.345	704.521	426.534	339.236	827.12	869.892	436.118	348.798						0.0239871	0.0253821	-0.118148	-0.61257	-0.147621	-0.13316	0.119122	-0.304128	-0.143392	0.0815188
705	397.953	264.09	266.054	205.809	342.221	92.2294					0.782268	1.38563	0.165863	1.64692	0.144353	0.572046	0.782847	0.254477				435.983	705.592	432.24	336.043	811.342	860.75	458.589	366.335						0.016151	0.0269405	-0.106351	-0.616217	-0.163881	-0.142271	0.176784	-0.26914	-0.134748	0.0842563
708	412.602	283.397	258.545	217.16	350.794	90.9762					0.847875	1.56004	0.132958	1.79291	0.173019	0.550686	0.842914	0.286064				430.951	697.446	430.692	337.363	820.756	866.962	477.964	360.084						0.00442332	0.0150855	-0.109551	-0.61471	-0.15418	-0.13608	0.226502	-0.281611	-0.131265	0.0871339
711	393.574	272.867	247.918	201.722	330.744	85.7112					0.762654	1.46491	0.0863885	1.59436	0.105974	0.460944	0.745872	0.268502				433.449	724.384	437.31	329.942	783.25	863.8	467.142	381.117						0.0102464	0.0542913	-0.0958697	-0.623185	-0.192831	-0.139231	0.198733	-0.23965	-0.128437	0.0868219
714	401.759	272.846	249.409	225.09	352.601	88.16					0.799312	1.46472	0.0929226	1.8949	0.179059	0.502684	0.822266	0.295048				422.294	679.329	417.469	335.326	801.847	867.922	453.875	379.924						-0.015753	-0.0112832	-0.136889	-0.617036	-0.173665	-0.135123	0.164686	-0.24203	-0.145887	0.0805896
717	407.931	279.164	247.607	211.356	329.147	83.0201					0.826956	1.52179	0.0850274	1.71826	0.100632	0.415074	0.777958	0.289279				416.801	659.605	430.238	332.96	803.682	874.812	464.462	374.61						-0.0285561	-0.0399903	-0.110489	-0.619737	-0.171775	-0.128258	0.191856	-0.252631	-0.144948	0.0820721
720	399.739	265.924	251.448	206.618	340.585	83.5676					0.790267	1.40219	0.10186	1.65733	0.138881	0.424406	0.752489	0.267691				406.035	690.241	433.39	309.31	809.733	885.195	473.004	373.349						-0.0536476	0.00459908	-0.103974	-0.646748	-0.165539	-0.117911	0.213775	-0.255148	-0.140574	0.08722
723	415.049	286.937	262.267	208.568	316.637	89.4205					0.858833	1.59201	0.149268	1.68241	0.0587993	0.524169	0.810915	0.286216				413.266	667.133	435.394	321.859	802.124	862.317	461.577	392.783						-0.0367954	-0.0290332	-0.099831	-0.632416	-0.173381	-0.140709	0.18445	-0.216375	-0.143011	0.0822882
726	417.625	264.995	252.348	206.801	335.906	85.479					0.87037	1.3938	0.105801	1.65968	0.123236	0.456986	0.768312	0.267592				394.044	667.486	438.957	329.29	794.168	866.648	462.526	382.839						-0.0815968	-0.0285206	-0.0924631	-0.623929	-0.181579	-0.136393	0.186887	-0.236213	-0.149226	0.0812248
729	410.222	271.18	249.668	212.107	319.59	85.0795					0.837213	1.44968	0.0940597	1.72793	0.0686745	0.450177	0.771288	0.284905				405.491	647.806	442.297	333.014	794.489	868.234	456.179	378.178						-0.054916	-0.0571625	-0.0855587	-0.619677	-0.181249	-0.134813	0.1706	-0.245514	-0.151036	0.0796773
732	413.105	274.139	252.964	201.438	329.267	85.6655					0.850127	1.4764	0.108503	1.59071	0.101034	0.460165	0.76449	0.268322				391.928	628.789	439.423	337.63	787.769	863.825	456.485	392.773						-0.0865284	-0.0848401	-0.0914994	-0.614405	-0.188174	-0.139206	0.171385	-0.216395	-0.156208	0.0774978
735	411.843	272.298	242.578	203.038	330.819	88.6572					0.844476	1.45977	0.0629884	1.61129	0.106224	0.511158	0.765985	0.270584				386.88	627.835	432.216	331.521	767.187	871.521	465.507	380.633						-0.0982927	-0.0862292	-0.106402	-0.621381	-0.209385	-0.131537	0.194536	-0.240615	-0.162413	0.0802221
738	402.097	278.075	259.268	202.339	325.896	85.4671					0.800827	1.51196	0.136125	1.60229	0.0897604	0.456783	0.766292	0.271215				383.452	625.432	427.538	319.122	777.009	841.056	461.469	379.138						-0.106282	-0.0897273	-0.116072	-0.635542	-0.199262	-0.161895	0.184174	-0.243598	-0.171026	0.0803909
741	419.174	277.435	244.744	211.051	314.212	78.6883					0.877306	1.50618	0.0724786	1.71434	0.0506927	0.341239	0.760372	0.296224				401.567	599.474	438.892	324.329	759.886	857.908	468.73	370.84						-0.0640622	-0.127506	-0.0925975	-0.629595	-0.216908	-0.145103	0.202806	-0.260153	-0.16664	0.0823851
744	397.448	275.608	259.372	207.909	338.081	83.6947					0.780005	1.48968	0.13658	1.67393	0.130508	0.426573	0.77288	0.274663				391.247	605.647	431.995	340.111	766.601	848.682	471.883	371.807						-0.0881158	-0.118523	-0.106858	-0.611571	-0.209988	-0.154296	0.210898	-0.258224	-0.167085	0.0805086
747	403.758	271.045	240.019	213.146	326.395	83.0091					0.808264	1.44846	0.0517769	1.74128	0.0914297	0.414887	0.759349	0.289072				383.931	590.702	451.503	339.975	770.133	862.329	481.286	384.453						-0.105167	-0.140274	-0.0665257	-0.611727	-0.206348	-0.140697	0.235026	-0.232993	-0.158588	0.0823829
750	404.463	267.332	250.815	212.306	307.897	87.8327					0.811422	1.41491	0.0990833	1.73049	0.0295753	0.497105	0.763765	0.283594				393.368	610.849	448.604	338.353	781.224	869.745	474.862	392.384						-0.083171	-0.110951	-0.0725181	-0.613579	-0.194919	-0.133307	0.218542	-0.217172	-0.150884	0.0812321
753	400.808	268.037	246.563	204.082	318.563	79.5484					0.795053	1.42128	0.0804517	1.62471	0.065242	0.355899	0.723773	0.276052				376.358	597.301	430.879	337.365	773.75	861.923	462.116	392.984						-0.122816	-0.130669	-0.109164	-0.614707	-0.20262	-0.141102	0.185833	-0.215975	-0.168902	0.0774434
756	429.691	279.421	248.722	207.444	322.442	88.8528					0.92441	1.52412	0.0899117	1.66795	0.0782106	0.514492	0.799849	0.282836				356.995	588.076	432.293	335.815	756.417	872.012	459.276	398.752						-0.167946	-0.144095	-0.106242	-0.616477	-0.220483	-0.131048	0.178546	-0.204467	-0.176527	0.0768207
759	443.417	263.789	229.335	203.259	334.377	82.4726					0.985882	1.38291	0.00495908	1.61413	0.118123	0.405742	0.751957	0.275425				374.614	563.465	430.143	337.516	755.743	872.483	473.798	386.661						-0.126881	-0.179915	-0.110687	-0.614535	-0.221178	-0.130578	0.215811	-0.22859	-0.174569	0.0801088
762	435.241	285.375	248.579	207.711	322.423	85.298					0.949265	1.5779	0.0892872	1.67138	0.0781481	0.453901	0.803315	0.290553				352.393	596.742	442.82	336.955	752.631	847.781	464.56	390.731						-0.178672	-0.131483	-0.0844774	-0.615175	-0.224385	-0.155194	0.192107	-0.220468	-0.177218	0.0783174
765	420.299	275.68	243.237	202.942	326.619	88.745					0.882347	1.49033	0.0658766	1.61006	0.0921811	0.512655	0.775574	0.274376				358.842	574.258	441.512	337.745	750.274	861.644	473.52	399.502						-0.163642	-0.164207	-0.0871809	-0.614273	-0.226814	-0.14138	0.215098	-0.202971	-0.173171	0.079918
768	441.543	288.71	249.483	196.255	319.794	82.7797					0.977488	1.60803	0.0932486	1.52405	0.069358	0.410977	0.780524	0.282315				347.779	569.764	417.665	331.549	755.99	861.479	485.351	382.138						-0.189427	-0.170747	-0.136484	-0.62135	-0.220923	-0.141544	0.245458	-0.237613	-0.184079	0.0828307
771	436.88	267.497	236.62	199.081	300.092	86.0512					0.956605	1.41641	0.0368827	1.56039	0.00347621	0.466739	0.740084	0.276225				356.844	540.98	419.832	339.937	755.541	848.451	473.056	393.163						-0.168298	-0.21264	-0.132004	-0.61177	-0.221385	-0.154526	0.213907	-0.215618	-0.187792	0.0788577
774	424.101	268.779	242.912	202.297	313.534	85.5484					0.899371	1.42799	0.0644511	1.60176	0.0484232	0.458169	0.750028	0.274155				359.172	549.011	406.429	323.279	740.713	844.858	474.063	377.869						-0.162873	-0.200952	-0.159715	-0.630795	-0.236667	-0.158107	0.216492	-0.246129	-0.197343	0.0809787
777	445.574	281.178	249.437	206.607	314.833	80.2495					0.99554	1.53999	0.0930448	1.65718	0.0527689	0.367849	0.784397	0.292348				352.738	527.556	452.072	334.635	717.848	877.562	463.653	376.53						-0.177869	-0.232178	-0.0653491	-0.617825	-0.26023	-0.125517	0.189778	-0.2488	-0.192249	0.0798701
780	434.654	271.665	249.123	189.435	322.27	81.2029					0.946634	1.45406	0.0916702	1.43634	0.0776368	0.3841	0.731739	0.259665				347.365	515.532	449.459	344.507	722.06	862.049	469.563	385.756						-0.190392	-0.249678	-0.0707502	-0.606551	-0.255889	-0.140976	0.204943	-0.230394	-0.192461	0.0796874
783	426.695	278.698	227.218	210.465	326.349	79.8793					0.91099	1.51759	-0.00431772	1.70681	0.0912785	0.361539	0.76398	0.299067				335.483	502.851	459.908	326.171	709.071	877.186	488.767	398.959						-0.218085	-0.268135	-0.0491481	-0.627491	-0.269275	-0.125892	0.254222	-0.204054	-0.188482	0.0872229
786	441.953	276.5	239.074	207.609	312.949	87.0494					0.979326	1.49773	0.0476359	1.67007	0.046467	0.483753	0.787498	0.289191				348.176	506.408	445.23	342.65	723.607	869.507	479.179	385.704						-0.1885	-0.262958	-0.079495	-0.608671	-0.254295	-0.133544	0.229621	-0.230499	-0.191043	0.0821428
789	436.123	276.937	229.067	208.624	309.098	82.2212					0.953216	1.50168	0.00378469	1.68313	0.0335923	0.401457	0.762809	0.298196				329.692	523.277	442.138	327.176	725.045	867.565	476.804	391.336						-0.231582	-0.238406	-0.0858866	-0.626344	-0.252813	-0.135479	0.223526	-0.219262	-0.195781	0.0827882
792	430.881	284.62	226.006	208.765	295.897	85.33					0.929738	1.57109	-0.00962964	1.68495	-0.0105514	0.454446	0.770007	0.306651				326.742	512.783	450.031	337.863	719.364	868.063	475.825	397.59						-0.238459	-0.25368	-0.069568	-0.614139	-0.258668	-0.134983	0.221014	-0.206785	-0.194408	0.0821151
795	421.746	269.453	234.128	204.773	305.686	73.8547					0.888827	1.43408	0.0259596	1.63359	0.0221833	0.25885	0.710582	0.291766				331.997	516.1	446.224	340.13	695.679	882.357	472.086	404.992						-0.22621	-0.248852	-0.0774401	-0.611549	-0.283076	-0.120739	0.211418	-0.192018	-0.193558	0.0812455
798	431.568	271.482	235.002	193.573	318.167	86.3958					0.932815	1.4524	0.0297917	1.48956	0.0639168	0.472613	0.740183	0.267053				331.689	513.923	447.882	346.115	703.083	865.121	493.786	386.018						-0.226928	-0.252021	-0.0740112	-0.604714	-0.275446	-0.137914	0.267102	-0.229871	-0.191725	0.0856877
801	428.273	278.034	227.106	209.009	312.493	81.4424					0.918058	1.51159	-0.00480983	1.68808	0.0449439	0.388182	0.757674	0.299202				327.381	519.301	450.783	339.785	710.878	858.547	503.83	376.769						-0.236968	-0.244193	-0.0680132	-0.611943	-0.267413	-0.144466	0.292876	-0.248324	-0.191055	0.0889108
804	449.154	278.413	233.299	199.597	304.034	79.2724					1.01158	1.51501	0.0223278	1.56703	0.0166589	0.351195	0.747299	0.291404				302.781	525.804	434.505	330.951	715.157	852.765	496.779	390.822						-0.294304	-0.234728	-0.101667	-0.622032	-0.263003	-0.150228	0.274784	-0.220288	-0.201433	0.0876419
807	428.656	284.438	230.359	214.546	290.051	76.1161					0.919773	1.56944	0.00944279	1.75929	-0.0300982	0.297396	0.754208	0.320453				311.168	509.352	438.024	337.844	709.018	873.12	512.583	422.223						-0.274757	-0.258673	-0.0943933	-0.61416	-0.26933	-0.129943	0.315337	-0.157641	-0.185445	0.0913293
810	443.354	278.368	249.045	198.418	299.211	78.9525					0.9856	1.5146	0.0913271	1.55186	0.000528904	0.345742	0.748278	0.285311				306.031	489.257	436.818	334.533	702.664	854.046	529.002	401.185						-0.286728	-0.28792	-0.0968867	-0.617942	-0.275877	-0.148951	0.357471	-0.199612	-0.194556	0.0963123
813	420.76	278.03	230.17	192.268	283.668	88.1965					0.88441	1.51156	0.00861458	1.47277	-0.0514449	0.503306	0.721536	0.280974				290.71	499.13	439.893	341.6	691.566	863.149	519.594	397.208						-0.322437	-0.273551	-0.0905287	-0.60987	-0.287315	-0.13988	0.333328	-0.207548	-0.199725	0.094123
816	419.761	275.93	233.916	198.73	299.245	82.266					0.879936	1.49259	0.0250332	1.55588	0.0006436	0.402221	0.72605	0.284159				295.257	494.672	437.233	345.941	683.544	839.55	543.177	385.348						-0.311841	-0.280039	-0.0960278	-0.604913	-0.295581	-0.163396	0.393845	-0.231208	-0.198645	0.0998004
819	413.906	262.413	222.236	207.693	288.195	81.2102					0.853715	1.37048	-0.026153	1.67115	-0.0363061	0.384224	0.702851	0.293565				295.048	495.177	427.017	322.512	690.893	850.908	528.177	415.356						-0.312328	-0.279304	-0.11715	-0.63167	-0.288008	-0.152077	0.355354	-0.171342	-0.199566	0.097412
822	440.198	283.171	239.844	208.296	301.716	91.3007					0.971463	1.558	0.0510096	1.67891	0.00890703	0.556217	0.804084	0.295668				294.701	478.997	432.909	334.938	709.472	845.704	525.477	404.319						-0.313136	-0.302852	-0.104969	-0.617478	-0.268862	-0.157264	0.348425	-0.19336	-0.201187	0.0958112
825	412.219	272.108	228.263	210.142	274.995	88.2669					0.84616	1.45806	0.000258015	1.70265	-0.0804445	0.504506	0.738532	0.301627				283.889	496.922	436.727	328.923	689.884	851.71	513.057	403.154						-0.338336	-0.276765	-0.0970742	-0.624348	-0.289048	-0.151279	0.316553	-0.195685	-0.206998	0.0937752
828	413.647	277.001	229.829	197.216	292.591	81.9461					0.852553	1.50226	0.00712118	1.53642	-0.0216053	0.396768	0.712252	0.286259				280.995	509.126	446.924	342.137	662.125	862.175	514.355	400.105						-0.345081	-0.259002	-0.0759919	-0.609257	-0.317655	-0.140851	0.319885	-0.201767	-0.203715	0.0940092
831	402.223	286.555	234.336	215.467	290.629	83.1645					0.80139	1.58856	0.0268728	1.77114	-0.0281681	0.417535	0.762889	0.315518				287.541	442.488	453.147	325.264	672.862	851.366	531.426	387.07						-0.329825	-0.355989	-0.0631261	-0.628527	-0.30659	-0.151621	0.36369	-0.227773	-0.21247	0.101289
834	412.821	279.749	233.609	197.858	299.005	80.8565					0.848853	1.52708	0.0236853	1.54467	-0.000159604	0.378196	0.720388	0.286844				287.115	485.563	454.637	340.513	678.958	854.289	518.238	396.459						-0.330816	-0.293296	-0.0600445	-0.611112	-0.300307	-0.148708	0.329848	-0.20904	-0.202935	0.0952311
837	420.145	273.779	230.382	189.461	285.545	81.9963					0.881656	1.47315	0.00954489	1.43667	-0.0451691	0.397624	0.692246	0.276678				280.181	480.559	428.737	349.913	673.337	858.767	520.227	397.872						-0.346977	-0.300579	-0.113593	-0.600376	-0.3061	-0.144246	0.334954	-0.206223	-0.210393	0.0944157
																						280.524	455.093	450.469	332.053	637.218	828.913	529.426	393.225						-0.346179	-0.337643	-0.0686618	-0.620774	-0.343322	-0.173996	0.358559	-0.215493	-0.218439	0.100476
																						294.482	475.244	444.136	347.944	689.015	848.52	532.247	392.317						-0.313647	-0.308315	-0.0817558	-0.602626	-0.289944	-0.154457	0.365797	-0.217306	-0.200282	0.0974062
																						288.115	468.967	436.284	330.184	676.102	815.01	526.838	389.579						-0.328485	-0.31745	-0.097989	-0.622908	-0.303251	-0.18785	0.351917	-0.222768	-0.216098	0.0975985
																						287.754	471.373	448.745	343.21	645.676	833.267	520.838	373.75						-0.329327	-0.313949	-0.072228	-0.608032	-0.334606	-0.169657	0.33652	-0.254348	-0.218203	0.0963367
																						291.656	453.094	440.632	330.979	668.078	839.833	531.197	366.669						-0.320233	-0.340553	-0.0890005	-0.622	-0.31152	-0.163114	0.363103	-0.268475	-0.218974	0.0997593
																						282.616	444.564	447.369	340.787	677.625	830.254	524.569	379.486						-0.341303	-0.352968	-0.0750729	-0.610799	-0.301681	-0.172659	0.346095	-0.242903	-0.218911	0.097835
																						271.733	447.015	437.965	340.54	668.513	838.401	511.481	381.892						-0.366669	-0.3494	-0.0945151	-0.611081	-0.311072	-0.164541	0.312511	-0.238103	-0.227859	0.0946533
																						281.685	470.917	440.621	348.018	675.046	830.299	508.84	377.27						-0.343472	-0.314612	-0.0890242	-0.602541	-0.304339	-0.172615	0.305732	-0.247325	-0.221024	0.0920191
																						278.488	454.525	445.294	340.113	669.165	844.689	493.862	369.725						-0.350924	-0.33847	-0.0793621	-0.611569	-0.310399	-0.158274	0.267297	-0.262377	-0.23051	0.0901026
																						274.221	470.891	444.869	338.189	655.638	818.13	519.662	377.335						-0.360868	-0.31465	-0.0802416	-0.613766	-0.324339	-0.18474	0.333502	-0.247196	-0.224037	0.0965929
[truncated: 2 more columns]

## Sheet: G
		50mM glucose G004-1.tif	50mM glucose G005-1.tif	50mM glucose G007-1.tif	50mM glucose G008-1.tif	50mM glucose G009-1.tif	50mM glucose G010-1.tif						50mM glucose G004-1.tif	50mM glucose G005-1.tif	50mM glucose G007-1.tif	50mM glucose G008-1.tif	50mM glucose G009-1.tif	50mM glucose G010-1.tif							50mM pryuvate.nd2	50mM pryuvate001.nd2	50mM pryuvate002.nd2	50mM pryuvate003.nd2	50mM pryuvate004.nd2	50mM pryuvate005.nd2					50mM pryuvate.nd2	50mM pryuvate001.nd2	50mM pryuvate002.nd2	50mM pryuvate003.nd2	50mM pryuvate004.nd2	50mM pryuvate005.nd2						Peak
	time（sec）	Mean1	Mean1	Mean1	Mean1	Mean1	Mean1						F/F0	F/F0	F/F0	F/F0	F/F0	F/F0	mean	SEM					raw data	raw data	raw data	raw data	raw data	raw data					F/F0	F/F0	F/F0	F/F0	F/F0	F/F0	Mean	SEM					glucose	pryuvate
1	0	93.5092	134.38	1136.65	53.9821	218.259	29.0766						0.0582588	-0.188121	0.0534297	0.229757	-0.024055	0.0163504	0.0242699	0.0552987					840.155	1366.91	148.839	386.993	247.745	386.221					0.0289062	0.0662801	-0.0654677	0.0257881	0.0988894	0.0133625	0.0279598	0.0226913					4.24516	1.19664
2	3	76.3006	160.686	1088.44	38.7993	220.343	35.272						-0.136494	-0.0291827	0.00875073	-0.11612	-0.0147386	0.232906	-0.0091464	0.0538526					798.197	1348.83	145.809	386.48	250.493	392.176					-0.0224782	0.052175	-0.0844918	0.0244293	0.111079	0.0289862	0.0182833	0.0271639					0.28525	0.49685
3	6	88.4693	158	1038.3	28.0968	216.899	24.1533						0.00122139	-0.0454137	-0.0377214	-0.359932	-0.0301349	-0.15574	-0.10462	0.0555363					827.308	1341.45	149.515	399.313	251.194	398.044					0.0131737	0.0464169	-0.0612244	0.058444	0.114188	0.0443831	0.0358969	0.0236428					4.13483	3.09507
4	9	77.181	158.908	1122.46	47.3548	220.24	24.4943						-0.12653	-0.0399303	0.0402774	0.0787814	-0.0151983	-0.14382	-0.0344034	0.0361694					813.94	1297.76	154.517	383.911	227.23	386.353					-0.00319854	0.0123387	-0.0298191	0.0176203	0.00789505	0.0137081	0.00309076	0.00719967					1.26705	2.96336
5	12	78.2147	160.644	1065.52	34.7168	218.694	29.5862						-0.114832	-0.0294419	-0.0124969	-0.209123	-0.0221112	0.0341631	-0.0589735	0.0359306					813.908	1319.36	151.708	384.488	225.845	382.363					-0.00323711	0.0291846	-0.0474582	0.019149	0.00175178	0.00323997	0.000438332	0.0107913					2.1262	2.75818
6	15	83.8589	162.099	1064.55	35.8566	231.111	41.1379						-0.0509553	-0.0206489	-0.0133953	-0.183157	0.0334136	0.437944	0.0338669	0.0861739					847.555	1312.33	159.263	393.31	237.674	390.741					0.0379691	0.0237002	-1.55086e-05	0.0425315	0.0542201	0.0252213	0.0306045	0.00767772					2.01542	4.33315
7	18	84.2945	173.812	1087.36	43.1183	227.079	33.0805						-0.0460255	0.0501168	0.00774341	-0.0177296	0.0153841	0.156304	0.0276322	0.0289198					815.458	1286.83	159.677	383.659	228.892	402.972					-0.00133901	0.00380795	0.00257827	0.0169505	0.0152661	0.0573139	0.0157629	0.0088268				Mean	2.34565	2.47388
8	21	82.3988	160.241	1064.83	58.2581	241.364	31.4291						-0.0674794	-0.0318749	-0.0131376	0.327168	0.0792585	0.0985803	0.0654191	0.0586239					833.741	1267.15	158.034	369.111	235.702	374.996					0.0210521	-0.0115406	-0.00773781	-0.0216119	0.0454728	-0.0160908	0.00159063	0.010669				SEM	0.642265	0.568717
9	24	78.9601	165.436	1108.14	32.7634	220.471	25.5824						-0.106396	-0.000490182	0.0270044	-0.253623	-0.014164	-0.105787	-0.0755758	0.0422276					824.193	1262.83	154.426	387.655	226.097	384.747					0.0093583	-0.0149066	-0.030388	0.0275425	0.00287132	0.00949404	0.000661939	0.00834178
10	27	77.1963	146.363	1134.16	47.0143	213.116	32.6705						-0.126357	-0.115721	0.0511168	0.0710245	-0.0470541	0.141972	-0.00416969	0.0444525					838.286	1290.44	163.461	390.188	213.613	370.476					0.0266177	0.00662461	0.0263385	0.0342572	-0.0525054	-0.0279498	0.00223047	0.014292
11	30	98.3589	171.257	1127.33	46.0143	231.831	28.249						0.113144	0.0346833	0.0447945	0.0482437	0.0366308	-0.0125777	0.044153	0.0164737					808.846	1304.62	152.37	374.043	216.976	389.703					-0.00943599	0.0176913	-0.0432978	-0.00853856	-0.0375877	0.0224978	-0.0097785	0.0110979
12	33	91.3037	143.271	1075.8	43.7061	206.632	26.751						0.0332988	-0.134404	-0.00297103	-0.00433899	-0.0760469	-0.0649392	-0.0415669	0.0250561					820.084	1288.45	163.899	389.63	237.037	390.997					0.00432628	0.00507852	0.0290905	0.0327768	0.0513934	0.0258938	0.0247599	0.00729964				P value	0.8842
13	36	75.5552	157.346	1073.47	34.4337	224.604	15.8544						-0.14493	-0.049362	-0.0051309	-0.215572	0.00431578	-0.445822	-0.14275	0.0698686					805.875	1233.91	162.093	366.085	211.341	384.597					-0.0130746	-0.0374726	0.0177472	-0.0296309	-0.06258	0.0091023	-0.0193181	0.0122856				95% confidence interval	-1.783 to 2.040
14	39	102.046	161.696	1030.33	44.3871	237.428	28.6092						0.154871	-0.0230813	-0.0451075	0.0111748	0.0616601	1.28166e-05	0.0265883	0.0295735					809.588	1208.04	167.814	363.581	215.748	365.425					-0.00852778	-0.0576524	0.0536714	-0.0362679	-0.0430337	-0.0412031	-0.0221689	0.0165261				F, DFn, Dfd	1.275, 5, 5
15	42	81.1994	168.492	1065.98	57.3441	221.195	29.3985						-0.0810532	0.0179738	-0.0120696	0.306346	-0.0109276	0.0276022	0.0413119	0.0552351					807.802	1219.88	163.918	372.324	206.244	361.722					-0.0107153	-0.0484164	0.0292079	-0.0130945	-0.0851903	-0.0509184	-0.0298545	0.0163155
16	45	82.4969	190.558	1064.87	46.2903	246.814	30.2069						-0.0663692	0.15129	-0.0130972	0.0545312	0.103627	0.0558592	0.0476402	0.0319792					794.474	1204.01	154.517	362.663	216.636	377.682					-0.0270376	-0.0607935	-0.0298191	-0.0387031	-0.0390949	-0.00904146	-0.0340816	0.00696375
17	48	80.2301	191.68	1056.91	25.5484	228.293	20.7471						-0.092023	0.15807	-0.0204752	-0.417986	0.0208134	-0.274801	-0.1044	0.085467					806.597	1181.63	163.185	357.073	225.846	373.212					-0.0121906	-0.0782537	0.0246068	-0.0535203	0.00175666	-0.0207698	-0.0230618	0.0152595
18	51	111.647	154.185	1068.27	31.7348	206.493	30.8544						0.263529	-0.068464	-0.00994211	-0.277055	-0.0766693	0.0784921	-0.0150182	0.0734119					814.807	1217.27	166.268	358.637	218.534	373.089					-0.00213614	-0.050454	0.0439656	-0.0493747	-0.0306784	-0.0210925	-0.018295	0.01449
19	54	109.104	176.436	1048.27	65.5484	232.602	35.4483						0.234751	0.0659684	-0.0284778	0.493247	0.0400779	0.239068	0.174106	0.0775556					818.337	1331.56	176.339	362.365	212.221	372.849					0.00218716	0.0387052	0.107199	-0.0394925	-0.0586806	-0.0217225	0.00469937	0.0247232
20	57	87.3712	185.72	1088.65	51.2975	209.364	25.2759						-0.011206	0.122059	0.00894007	0.168599	-0.0638294	-0.1165	0.0180104	0.0444334					791.875	1355.64	169.668	373.772	203.935	364.201					-0.0302199	0.0574867	0.0653136	-0.00925477	-0.0954329	-0.0444146	-0.00942031	0.0252436
21	60	115.893	194.644	1048.75	55.5627	223.582	22.908						0.311575	0.175975	-0.0280345	0.265764	-0.000251852	-0.199268	0.0876267	0.0802289					786.181	1379.59	173.18	356.252	232.924	376.325					-0.0371933	0.0761673	0.087366	-0.0556957	0.0331516	-0.0126027	0.0151989	0.0243526
22	63	99.1963	195.261	1075.97	44.0824	232.503	25.4751						0.122621	0.179704	-0.00280588	0.00423344	0.0396375	-0.109537	0.0389753	0.0415572					813.037	1313.69	169.44	321.322	209.713	374.608					-0.00430429	0.02476	0.063882	-0.148285	-0.0698028	-0.0171088	-0.0251431	0.0305903
23	66	108.641	183.069	1074.07	38.7634	218.287	36.4368						0.229509	0.106047	-0.00456677	-0.116938	-0.0239307	0.273621	0.0772902	0.062507					745.215	1360.48	177.472	351.224	212.709	299.692					-0.0873627	0.0612622	0.114312	-0.0690225	-0.0565161	-0.21367	-0.0418329	0.0474573
24	69	97.5798	209.185	1067.1	39.9247	252.345	28.6092						0.104326	0.263829	-0.011034	-0.0904824	0.128359	1.28166e-05	0.0658351	0.0514033					766.842	1301.71	172.615	344.245	206.299	377.877					-0.0608766	0.0154201	0.083816	-0.0875225	-0.0849454	-0.00853061	-0.0237732	0.0274023
25	72	95.1779	181.931	988.796	39.0609	210.567	30.4713						0.0771437	0.099168	-0.0836011	-0.11016	-0.0584479	0.0651011	-0.00179945	0.0376585					776.779	1275.68	184.606	344.746	197.14	361.695					-0.0487071	-0.00488962	0.159103	-0.0861951	-0.125573	-0.0509874	-0.0262082	0.0405736
26	75	84.8896	177.066	919.591	48.1936	212.587	30.6245						-0.0392907	0.069777	-0.147739	0.09789	-0.0494191	0.0704561	0.000279126	0.0388276					762.001	1248.76	180.014	347.141	215.421	361.186					-0.0668054	-0.0258884	0.130273	-0.0798449	-0.0444842	-0.0523245	-0.0231791	0.0316083
27	78	93.4509	203.432	981.448	49.8208	201.595	38.6284						0.057599	0.229074	-0.090411	0.134959	-0.0985671	0.350226	0.0971467	0.0725557					746.781	1235.76	163.584	353.371	229.423	357.247					-0.0854454	-0.0360253	0.0271127	-0.0633318	0.0176209	-0.0626583	-0.0337879	0.0189135
28	81	97.7055	196.416	953.517	45.6344	204.493	29.8123						0.105749	0.186682	-0.116296	0.0395893	-0.0856123	0.0420663	0.0286964	0.0466489					725.03	1189.71	168.792	374.874	226.266	340.366					-0.112083	-0.0719521	0.0598096	-0.00633612	0.00362005	-0.106952	-0.0389821	0.0281016
29	84	96.6933	159.053	882	40.0287	188.893	19.4981						0.0942937	-0.0390531	-0.182578	-0.0881132	-0.155366	-0.318459	-0.114879	0.0571216					697.055	1136.42	166.219	356.927	218.458	325.277					-0.146343	-0.113514	0.0436548	-0.0539057	-0.0310147	-0.146543	-0.0746109	0.0306318
30	87	96.9295	197.073	917.183	60.1864	211.777	18.0115						0.0969668	0.190651	-0.149971	0.371096	-0.0530383	-0.370422	0.0142137	0.107202					666.596	1020.09	169.397	337.31	213.53	336.833					-0.183645	-0.204261	0.063612	-0.105906	-0.0528736	-0.116221	-0.0998823	0.0396461
31	90	95.908	193.515	883.583	43.4194	191.991	20.9579						0.0854064	0.169156	-0.181111	-0.0108703	-0.141511	-0.267433	-0.0577271	0.0684052					655.592	969.839	163.901	377.432	200.428	336.587					-0.197121	-0.243463	0.0291018	0.000445603	-0.110986	-0.116867	-0.106481	0.0435598
32	93	93.4295	300.561	802.622	35.0645	210.178	16.8314						0.0573568	0.815896	-0.256144	-0.201202	-0.0601909	-0.411671	-0.00932592	0.17773					632.602	887.807	145.591	365.064	202.504	331.997					-0.225275	-0.307453	-0.0858644	-0.0323381	-0.101781	-0.12891	-0.146937	0.0412832
33	96	94.6043	300.502	773.383	42.0753	219.52	14.613						0.0706522	0.815536	-0.283242	-0.04149	-0.0184155	-0.489214	0.00897113	0.181771					599.025	882.876	165.318	393.562	206.038	300.527					-0.266396	-0.311299	0.0379983	0.0431995	-0.0861044	-0.21148	-0.132347	0.0627768
34	99	106.009	299.023	750.904	59.4373	224.216	23.7778						0.199723	0.806603	-0.304075	0.354031	0.00258263	-0.168865	0.148333	0.163789					594.614	853.384	162.948	419.333	194.478	296.378					-0.271798	-0.334305	0.0231169	0.11151	-0.137379	-0.222368	-0.138537	0.0711261
35	102	108.663	310.96	739.244	57.4552	228.148	30.3218						0.229752	0.878725	-0.314882	0.308877	0.0201623	0.0598754	0.197085	0.16232					606.714	810.161	196.168	481.497	202.878	295.695					-0.25698	-0.368021	0.231702	0.276286	-0.10012	-0.224157	-0.0735486	0.10944
36	105	121.89	324.274	741.161	45.5591	210.428	21.4253						0.379444	0.959161	-0.313105	0.0378739	-0.0590704	-0.251095	0.125535	0.194544					628.432	822.063	222.468	500.937	206.838	295.3					-0.230383	-0.358738	0.396834	0.327815	-0.082556	-0.225195	-0.0287037	0.129008
37	108	89.8067	365.429	715.296	51.7204	202.917	26.8276						0.016357	1.20781	-0.337076	0.178233	-0.0926594	-0.0622617	0.151733	0.222019					638.958	813.031	214.692	511.588	204.437	293.43					-0.217492	-0.365783	0.348012	0.356047	-0.093204	-0.2301	-0.0337533	0.126988
38	111	118.451	386.346	658.657	48.3369	212.97	23.4943						0.340528	1.33418	-0.389568	0.101154	-0.0477052	-0.178775	0.193303	0.249536					643.518	875.708	235.122	543.062	203.672	292.363					-0.211907	-0.316891	0.476288	0.439476	-0.0965968	-0.232901	0.00957802	0.144722
39	114	126.347	390.858	665.9	54.3082	210.64	18.1724						0.429885	1.36144	-0.382855	0.237186	-0.0581224	-0.364798	0.203789	0.26636					645.135	873.604	237.245	580.616	211.488	276.757					-0.209927	-0.318532	0.489615	0.539018	-0.0619301	-0.273848	0.0273993	0.158126
40	117	137.344	392.224	695.413	39.6272	205.253	22.1686						0.55434	1.3697	-0.355503	-0.0972597	-0.0822131	-0.225113	0.193991	0.267759					648.374	948.577	238.863	577.874	206.507	296.044					-0.205961	-0.260048	0.499772	0.531751	-0.0840237	-0.223243	0.0430412	0.151477
41	120	150.261	403.924	493.935	38.1936	205.403	27.3065						0.700525	1.44038	-0.54223	-0.129918	-0.0815428	-0.0455221	0.223616	0.293543					654.591	1056.98	230.564	602.046	207.072	313.909					-0.198347	-0.17549	0.447664	0.595821	-0.0815158	-0.176369	0.0686272	0.145492
42	123	144.009	448.142	640.717	54.5233	194.379	38.1149						0.629775	1.70753	-0.406194	0.242086	-0.130835	0.332277	0.395774	0.301308					634.209	1101.67	229.47	592.827	215.456	314.577					-0.223308	-0.140628	0.440798	0.571385	-0.0443285	-0.174617	0.0715503	0.140495
43	126	164.896	456.168	676.383	39.5412	215.137	36.5785						0.866151	1.75603	-0.37314	-0.0992188	-0.0380154	0.278574	0.398396	0.321955					621.797	1199.07	223.187	585.372	207.225	324.548					-0.238509	-0.064648	0.401347	0.551624	-0.0808385	-0.148456	0.0700867	0.132355
44	129	139.282	499.198	675	42.3692	226.617	26.59						0.576279	2.016	-0.374422	-0.0347947	0.013316	-0.0705668	0.354302	0.355421					650.798	1255.63	230.501	592.942	215.803	326.583					-0.202992	-0.0205238	0.44727	0.571689	-0.0427915	-0.143116	0.101589	0.132778
45	132	204.715	508.129	719.165	56.2401	217.124	37.1916						1.31679	2.06995	-0.33349	0.281196	-0.0291297	0.300004	0.600887	0.371187					655.344	1264.33	234.144	584.498	215.832	349.018					-0.197425	-0.013737	0.470144	0.549307	-0.0426629	-0.0842516	0.113562	0.128255
46	135	197.491	502.974	663.891	48.7276	225.475	42.1149						1.23504	2.03881	-0.384717	0.110055	0.00821269	0.472094	0.579915	0.367301					656.807	1281.2	227.329	575.199	213.546	354.839					-0.195633	-0.00057976	0.427355	0.524659	-0.0528017	-0.0689774	0.10567	0.120654
47	138	189.739	524.927	630.835	42.2294	229.398	37.1954						1.14731	2.17145	-0.415353	-0.0379794	0.0257539	0.300137	0.531886	0.391527					657.1	1338.36	227.607	559.554	222.479	357.28					-0.195275	0.0440098	0.429097	0.483191	-0.0131783	-0.0625736	0.114212	0.113062
48	141	238.009	471.71	627.404	42.8996	247.6	32.8429						1.69359	1.84992	-0.418532	-0.0227117	0.107141	0.147999	0.559568	0.392463					690.608	1385.77	233.09	516.63	213.115	361.791					-0.154239	0.0809934	0.463525	0.369413	-0.0547121	-0.0507379	0.10904	0.102616
49	144	240.696	504.713	671.009	52.724	251.409	26.1648						1.724	2.04932	-0.378121	0.201096	0.124175	-0.0854293	0.605839	0.415361					685.521	1397.75	233.612	519.062	217.091	364.615					-0.160468	0.0903393	0.466805	0.37586	-0.0370785	-0.0433276	0.115355	0.102713
50	147	251.23	461.429	654.73	44.767	251.565	31.5479						1.84321	1.78781	-0.393207	0.0198292	0.124874	0.102733	0.580875	0.397926					691.765	1395.13	234.05	490.993	227.363	407.006					-0.152821	0.0882957	0.469557	0.301457	0.00848321	0.0678975	0.130478	0.090378
51	150	258.362	460.98	625.717	56.5161	254.248	29.9387						1.92392	1.7851	-0.420096	0.287483	0.136871	0.0464845	0.626627	0.400504					679.126	1279.77	247.115	484.544	231.736	433.546					-0.1683	-0.00169237	0.551587	0.284364	0.0278808	0.137533	0.138562	0.102946
52	153	253.485	493.36	618.417	67.5448	263.184	36.0843						1.86873	1.98072	-0.426861	0.538726	0.176827	0.261299	0.73324	0.398394					692.003	1319.02	242.819	474.433	226.439	430.906					-0.15253	0.0289199	0.524611	0.257562	0.00438607	0.130607	0.132259	0.0962253
53	156	278.414	480.076	596.665	49.5448	250.608	57.2107						2.15086	1.90047	-0.447021	0.128671	0.120593	0.999756	0.808888	0.42983					696.64	1335.35	253.437	463.14	242.791	435.108					-0.14685	0.0416606	0.591284	0.227628	0.0769143	0.141632	0.155378	0.100971
54	159	300.163	500.439	630.148	53.3799	213.46	44.1188						2.39699	2.02349	-0.41599	0.216038	-0.0455123	0.542139	0.786193	0.470716					687.852	1340.83	244.201	460.19	234.462	433.473					-0.157614	0.0459375	0.53329	0.21981	0.0399744	0.137341	0.136457	0.0945877
55	162	274.807	493.541	638.587	49.2222	265.91	46.1341						2.11003	1.98182	-0.408169	0.121322	0.189016	0.612582	0.767768	0.425651					675.717	1383.93	261.973	462.227	229.754	452.502					-0.172475	0.0795583	0.644877	0.225208	0.0190891	0.18727	0.163921	0.112083
56	165	299.948	522.498	574.874	56.1577	248.445	40.3487						2.39456	2.15677	-0.467217	0.279319	0.110923	0.410358	0.814119	0.479091					685.319	1292.52	271.644	445.159	242.275	464.363					-0.160716	0.00825175	0.705599	0.179968	0.0746286	0.218391	0.17102	0.120268
57	168	281.046	455.106	697.27	52.1936	247.702	44.931						2.18064	1.7496	-0.353783	0.189013	0.107601	0.570529	0.740601	0.4092					684.367	1335.31	274.753	465.582	235.202	473.441					-0.161881	0.0416307	0.725122	0.234102	0.0432536	0.242208	0.187406	0.123606
58	171	310.561	516.149	608.052	51.6487	221.745	43.3448						2.51467	2.11841	-0.436468	0.1766	-0.00846689	0.515085	0.813305	0.494284					682.057	1285.73	282.847	457.248	246.989	461.763					-0.164711	0.00295706	0.775939	0.212011	0.0955366	0.211568	0.188883	0.130894
59	174	330.528	498.294	659.074	65.8172	271.229	40.2682						2.74063	2.01053	-0.389182	0.49937	0.2128	0.407544	0.913617	0.488445					682.513	1280.85	289.429	474.505	242.67	465.471					-0.164152	-0.000853407	0.817268	0.257755	0.0763807	0.221299	0.201283	0.138206
60	177	330.503	519.353	631.991	72.6595	237.604	49.5632						2.74036	2.13777	-0.414281	0.655243	0.0624453	0.732444	0.985663	0.496379					683.785	1285.6	297.718	467.389	234.651	443.92					-0.162594	0.00285112	0.869311	0.238892	0.0408096	0.164751	0.192337	0.14675
61	180	329.408	498.462	603.157	62.7204	235.782	34.3372						2.72796	2.01155	-0.441005	0.428822	0.0542968	0.200231	0.83031	0.50902					696.205	1272.67	299.586	448.929	241.659	501.341					-0.147384	-0.00723582	0.881042	0.18996	0.0718959	0.315413	0.217282	0.147815
62	183	374.61	529.677	614.535	49.4803	256.27	47.5977						3.23953	2.20014	-0.43046	0.127202	0.14591	0.663741	0.99101	0.580398					690.104	1296.22	301.581	464.472	255.701	464.577					-0.154856	0.0111362	0.89357	0.231158	0.134181	0.218952	0.222357	0.146662
63	186	371.377	508.485	599.244	57.1792	229.225	38.9502						3.20294	2.07211	-0.444631	0.302589	0.0249781	0.361475	0.919909	0.574328					671.783	1216.72	303.349	468.958	240.609	489.205					-0.177292	-0.0508774	0.904667	0.24305	0.0672377	0.283571	0.211726	0.155722
64	189	381.092	518.323	639.139	56.8495	250.261	52.5594						3.31288	2.13155	-0.407657	0.295079	0.119042	0.837174	1.04801	0.574369					650.283	1185.71	326.092	481.971	260.945	514.126					-0.203622	-0.0750724	1.04747	0.277543	0.157439	0.348958	0.258785	0.179448
65	192	376.531	543.383	614.913	62.7348	211.739	49.8774						3.26126	2.28295	-0.430109	0.42915	-0.0532105	0.743427	1.03891	0.585842					676.518	1129.75	315.227	477.573	263.406	519.004					-0.171493	-0.118724	0.97925	0.265885	0.168356	0.361758	0.247505	0.169783
66	195	375.644	469.611	586.804	77.4444	259.066	54.5594						3.25123	1.83724	-0.45616	0.764247	0.158415	0.907082	1.07701	0.53623					676.682	1146.38	321.949	483.187	259.423	579.127					-0.171292	-0.10575	1.02145	0.280767	0.150688	0.519508	0.282562	0.180395
67	198	406.862	523.489	613.774	54.172	249	43.1762						3.60452	2.16275	-0.431165	0.234083	0.113403	0.509191	1.03213	0.626928					678.428	1131.56	334.652	497.822	273.377	564.562					-0.169155	-0.11731	1.10122	0.319557	0.212584	0.481292	0.304698	0.189469
68	201	419.322	488.789	619.487	81.129	248.957	57.4866						3.74554	1.95311	-0.42587	0.848186	0.113212	1.0094	1.20726	0.60639					671.842	1109.75	353.78	475.667	268.96	576.98					-0.17722	-0.134319	1.22132	0.260833	0.192993	0.513872	0.312913	0.209994
69	204	389.988	638.317	610.939	73.9857	247.595	42.318						3.41355	2.85651	-0.433792	0.685455	0.107122	0.479193	1.18467	0.640063					675.164	1100.26	352.277	481.692	265.867	581.328					-0.173152	-0.141728	1.21188	0.276804	0.179271	0.525282	0.313059	0.209392
70	207	384.39	695.815	653.744	70.2975	239.786	56.2874						3.3502	3.2039	-0.394122	0.601435	0.0722021	0.967483	1.30018	0.653305					658.623	1102.66	345.645	482.738	276.718	592.766					-0.193408	-0.139855	1.17024	0.279576	0.2274	0.555292	0.31654	0.20522
71	210	447.411	562.591	640.987	73.0143	244.15	46.659						4.06342	2.399	-0.405944	0.663326	0.0917157	0.63093	1.24041	0.684256					675.517	1137.38	356.172	493.837	271.045	581.366					-0.172719	-0.112769	1.23633	0.308995	0.20224	0.525382	0.331244	0.21017
72	213	421.663	633.904	680.691	60.4982	260.056	57.4713						3.77202	2.82985	-0.369147	0.378199	0.162838	1.00887	1.29711	0.669949					650.047	1181.52	365.063	487.683	274.966	568.782					-0.203911	-0.0783395	1.29216	0.292684	0.219631	0.492364	0.335765	0.217355
73	216	437.295	644.112	706.487	53	268.612	33.3755						3.94893	2.89152	-0.34524	0.207384	0.2011	0.166615	1.17839	0.726953					658.037	1180.26	375.941	499.341	277.342	598.909					-0.194127	-0.0793174	1.36046	0.323584	0.23017	0.571411	0.368697	0.228284
74	219	476.19	604.416	655.991	81.4337	252.319	35.4828						4.38912	2.65169	-0.392039	0.855127	0.128244	0.240274	1.31207	0.751128					649.421	1141.39	369.725	500.033	280.9	597.657					-0.204678	-0.10964	1.32143	0.32542	0.24595	0.568127	0.357769	0.225186
75	222	402.451	678.172	645.457	63.638	268.563	37.6935						3.5546	3.0973	-0.401802	0.449726	0.20088	0.317548	1.20304	0.684336					656.167	1098.44	371.538	525.352	270.207	581.054					-0.196417	-0.143143	1.33282	0.392532	0.198523	0.524563	0.351479	0.228247
76	225	439.276	695.937	667.722	75.4588	252.231	40.9004						3.97136	3.20463	-0.381167	0.719014	0.127852	0.429642	1.34522	0.731365					665.327	1213.25	381.453	558.823	273.47	589.321					-0.185199	-0.0535882	1.39507	0.481252	0.212996	0.546253	0.399464	0.231036
77	228	370.012	643.099	699.356	74.5878	229.97	41.1647						3.18749	2.8854	-0.351848	0.699172	0.0283103	0.438881	1.1479	0.616053					658.588	1072.94	348.042	561.908	269.389	604.849					-0.193452	-0.163037	1.18529	0.489428	0.194896	0.586996	0.35002	0.212597
78	231	413.377	672.228	749.948	84.2222	246.73	37.7816						3.67826	3.06139	-0.304961	0.918651	0.103253	0.320627	1.2962	0.679981					663.36	1085.09	314.098	603.815	290.358	650.797					-0.187608	-0.153558	0.972161	0.600511	0.287902	0.707552	0.37116	0.193343
79	234	446.028	714.234	720.217	79.681	245.893	46.6284						4.04777	3.31518	-0.332515	0.815199	0.0995095	0.62986	1.42917	0.737145					662.139	1151.38	355.609	615.486	280.933	645.583					-0.189103	-0.101845	1.2328	0.631446	0.246098	0.693873	0.418878	0.220146
80	237	445.561	657.587	760.887	79.8495	256.471	41.7318						4.04249	2.97294	-0.294823	0.819037	0.14681	0.458703	1.35753	0.709754					666.234	1161.95	410.518	648.915	289.712	653.258					-0.184089	-0.0936063	1.57756	0.720057	0.285038	0.71401	0.503162	0.265948
81	240	416.528	698.637	674.3	73.3262	270.75	31.3295						3.71391	3.22094	-0.37507	0.670431	0.210656	0.0950988	1.256	0.715217					658.16	1175.95	439.306	701.069	293.334	675.763					-0.193976	-0.0826834	1.75831	0.8583	0.301105	0.773059	0.56902	0.295432
82	243	430.595	703.696	702.426	90.1004	276.341	38.3908						3.87311	3.25151	-0.349004	1.05256	0.235656	0.341921	1.40096	0.71179					654.311	1185.29	467.803	744.429	310.924	688.198					-0.19869	-0.0753971	1.93724	0.973231	0.379126	0.805685	0.636866	0.321689
83	246	454.632	700.894	725.083	116.133	269.839	34.5785						4.14514	3.23458	-0.328006	1.6456	0.206586	0.208665	1.51876	0.746251					649.524	1224.17	495.95	787.547	303.802	675.086					-0.204553	-0.0450654	2.11397	1.08752	0.347534	0.771284	0.678449	0.348776
84	249	390.313	726.224	781.657	101.179	242.31	42.2452						3.41723	3.38762	-0.275574	1.30495	0.0834908	0.476649	1.39906	0.668885					683.976	1201.91	522.96	864.103	313.539	695.859					-0.16236	-0.0624296	2.28356	1.29045	0.390726	0.825788	0.760955	0.37729
85	252	421.236	705.224	706.761	86.6272	290.531	42.4866						3.7672	3.26074	-0.344986	0.973439	0.299109	0.485087	1.40677	0.691416					689.522	1236.98	534.207	938.189	317.036	648.723					-0.155568	-0.0350714	2.35418	1.48682	0.406234	0.702113	0.793118	0.394208
86	255	428.11	745.845	707.77	101.81	270.822	55.0766						3.84499	3.50616	-0.344051	1.31932	0.210981	0.925161	1.57709	0.705058					723.324	1237.08	590.091	1114.38	332.134	654.01					-0.114172	-0.0349985	2.70506	1.95385	0.473205	0.715985	0.949822	0.464498
87	258	358.383	612.132	773.7	100.194	273.649	42.6284						3.05588	2.69831	-0.282948	1.28249	0.22362	0.490043	1.24457	0.557991					772.093	1221.51	595.432	1316.71	357.803	679.559					-0.0544463	-0.0471409	2.7386	2.49015	0.587059	0.78302	1.08287	0.504249
88	261	388.641	724.043	759.139	102.531	267.668	32.8889						3.39831	3.37444	-0.296443	1.33573	0.196877	0.149606	1.35975	0.677618					813.4	1266.98	606.056	1377.34	358.333	720.536					-0.003859	-0.0116724	2.80531	2.65086	0.589412	0.890534	1.15343	0.51817
89	264	427.684	747.31	779.017	118.423	284.173	46.2299						3.84017	3.51501	-0.27802	1.69777	0.270681	0.615931	1.61026	0.706093					879.29	1272.91	614.779	1444.61	353.943	736.539					0.0768337	-0.00704494	2.86008	2.82917	0.569937	0.932522	1.21025	0.535301
90	267	389.509	771.076	846.783	107.247	278.632	53.5939						3.40814	3.6586	-0.215216	1.44318	0.245901	0.873334	1.56899	0.662889					894.255	1259.64	642.034	1473.3	376.666	747.624					0.0951602	-0.0174005	3.0312	2.90521	0.67073	0.961607	1.27442	0.555803
91	270	421.595	779.871	807.435	122.383	294.313	47.977						3.77126	3.71174	-0.251683	1.788	0.316018	0.677	1.66872	0.709697					916.595	1291.3	640.507	1495.23	397.544	763.729					0.122519	0.00730085	3.02162	2.96336	0.763336	1.00386	1.31367	0.552657
92	273	420.549	744.172	899.809	142.717	308.704	43.0766						3.75942	3.49605	-0.166073	2.25121	0.380371	0.50571	1.70445	0.693318					965.405	1306.03	604.135	1463.42	413.949	783.284					0.182296	0.0187871	2.79325	2.87905	0.836101	1.05517	1.29411	0.512799
93	276	391.169	727.452	867.339	133.502	304.773	49.4291						3.42692	3.39504	-0.196165	2.04128	0.362792	0.727757	1.62627	0.639481					1026.39	1329.09	627.65	1466.12	412.276	782.549					0.256978	0.0367775	2.9409	2.88619	0.828678	1.05324	1.33379	0.521802
94	279	404.181	721.766	866.43	150.62	275.576	46.1034						3.57418	3.36068	-0.197007	2.43125	0.232237	0.611509	1.66881	0.676685					1096.57	1324.32	627.121	1462.13	413.705	783.085					0.342931	0.033053	2.93757	2.87562	0.835019	1.05465	1.34647	0.514743
95	282	342.613	734.564	865.352	167.735	290.253	56.2797						2.87741	3.43801	-0.198006	2.82114	0.297864	0.967214	1.7006	0.626347					1127.59	1356.82	637.117	1419.83	453.812	803.641					0.380916	0.0584046	3.00033	2.76348	1.01292	1.10858	1.38744	0.499745
96	285	390.899	767.149	1020.69	143.688	300.06	39.8621						3.42387	3.63487	-0.0540448	2.27334	0.341718	0.393349	1.66885	0.674963					1203.6	1334.62	629.505	1384.1	497.185	854.589					0.474002	0.0410893	2.95254	2.66879	1.2053	1.24226	1.43066	0.475446
97	288	382.276	739.69	981.274	167.179	288.3	48.4904						3.32628	3.46897	-0.0905722	2.80848	0.289132	0.694945	1.74954	0.663197					1222.72	1325	630.801	1357.48	516.524	836.463					0.497415	0.0335833	2.96068	2.59822	1.29108	1.1947	1.42928	0.469115
98	291	409.135	747.927	926.226	179.265	285.338	64.8506						3.63025	3.51874	-0.14159	3.08381	0.27589	1.2668	1.93898	0.68831					1241.45	1336.38	633.145	1321.55	515.146	856.656					0.520353	0.0424617	2.97539	2.50299	1.28497	1.24768	1.42897	0.459947
99	294	420.101	751.726	1018.59	183.778	289.717	54.9042						3.75435	3.54169	-0.0559911	3.18661	0.29547	0.919135	1.94021	0.710445					1296.21	1394.43	652.206	1261.85	530.27	867.419					0.587425	0.0877483	3.09507	2.34474	1.35205	1.27592	1.45716	0.452629
100	297	350.426	707.043	1073.11	161.419	299.128	70.6552						2.96583	3.27173	-0.00545731	2.67727	0.337552	1.4697	1.7861	0.57158					1343.99	1387.71	645.56	1264.44	539.777	878.949					0.645932	0.0825047	3.05334	2.3516	1.39422	1.30618	1.4723	0.444259
101	300	393.795	755.617	1090.41	187.667	309.413	48.8161						3.45664	3.5652	0.0105761	3.2752	0.383541	0.70633	1.89958	0.692378					1378.34	1442.75	610.511	1202.56	541.258	953.634					0.688	0.125442	2.83328	2.18759	1.40079	1.50213	1.45621	0.399896
102	303	369.883	784.386	1102.26	163.871	309.833	67.272						3.18603	3.73901	0.0215565	2.73312	0.385417	1.35144	1.90276	0.628578					1407.33	1488.21	610.865	1194.11	575.042	976.338					0.723505	0.160903	2.8355	2.16519	1.55064	1.56171	1.49958	0.392791
103	306	352.089	768.518	1053.04	175.097	297.636	67.9962						2.98465	3.64314	-0.0240574	2.98885	0.330879	1.37676	1.88337	0.628142					1464.33	1573.99	591.53	1081.92	594.047	1067.31					0.793308	0.227814	2.7141	1.86782	1.63494	1.80039	1.50639	0.357557
104	309	363.905	700.29	1159	225.401	283.773	64.8084						3.11837	3.23093	0.0741413	4.13483	0.26889	1.26533	2.01542	0.696837					1535.17	1663.99	574.406	1064.65	673.002	1140.71					0.880069	0.298018	2.60658	1.82203	1.98515	1.99297	1.59747	0.345383
105	312	332.736	734.505	1110.29	205.495	330.051	53.2184						2.76563	3.43765	0.0289989	3.68134	0.475824	0.860209	1.87494	0.65557					1577.71	1808.17	570.721	959.18	738.918	1260.41					0.932167	0.410489	2.58345	1.54246	2.27752	2.30706	1.67553	0.353844
106	315	353.739	660.977	1146.54	165	325.499	65.1264						3.00332	2.99341	0.0625928	2.75884	0.455468	1.27644	1.75835	0.544109					1676.28	1859.99	579.923	915.413	788.878	1333.93					1.05288	0.450912	2.64123	1.42645	2.49912	2.49994	1.76176	0.373958
107	318	348.04	730.716	1194.05	174.025	339.754	61.8008						2.93882	3.41476	0.106623	2.96444	0.519208	1.1602	1.85067	0.582013					1746.78	1850.06	562.647	900.274	819.067	1419.36					1.13922	0.443163	2.53275	1.38632	2.63303	2.72411	1.80977	0.388718
108	321	344.963	638.792	1243.5	159.004	343.298	56.908						2.904	2.85938	0.152454	2.62223	0.535054	0.989176	1.67705	0.513109					1792.27	1889.79	563.188	844.196	847.281	1631.21					1.19493	0.474156	2.53615	1.23768	2.75818	3.27994	1.9135	0.447702
109	324	359.969	615.832	1251.26	145.068	364.617	60.1456						3.07383	2.72066	0.159643	2.30477	0.630383	1.10234	1.66527	0.488591					1772.3	1870.42	555.342	833.113	828.375	1851.29					1.17047	0.459049	2.48688	1.2083	2.67432	3.8574	1.97607	0.510807
110	327	301.816	620.396	1282.2	176.179	397.73	58.4291						2.4157	2.74824	0.188321	3.01351	0.77845	1.04234	1.69776	0.479696					1776.58	1855.39	533.232	784.915	839.616	1929.56					1.17571	0.447323	2.34806	1.08054	2.72417	4.06277	1.9731	0.542583
111	330	326.534	616.703	1360.02	126.993	402.139	62.9923						2.69544	2.72592	0.260445	1.893	0.798164	1.20185	1.5958	0.414299					1793.67	1856.57	576.49	773.299	752.127	1966.75					1.19664	0.448244	2.61967	1.04975	2.33611	4.16035	1.96846	0.551192
112	333	342.138	584.957	1323.25	152.237	443.385	44.41						2.87203	2.53413	0.226363	2.46808	0.982597	0.552318	1.60592	0.469386					1768.39	1888.93	555.799	731.516	714.974	1999.55					1.16568	0.473487	2.48975	0.939002	2.17132	4.24639	1.91427	0.560458
113	336	340.534	593.792	1367.33	133.763	466.366	71.5019						2.85388	2.5875	0.267218	2.04724	1.08536	1.49929	1.72341	0.396119					1730.08	1833.47	546.604	706.124	737.891	2019.99					1.11876	0.43023	2.43202	0.871697	2.27297	4.30002	1.90428	0.577642
114	339	308.279	501.551	1360.28	105.201	475.54	71.567						2.48884	2.03021	0.260683	1.39656	1.12637	1.50157	1.46737	0.312983					1641.65	1831.72	516.179	638.89	804.761	2020.12					1.01047	0.428861	2.24099	0.693483	2.56957	4.30036	1.87396	0.598149
115	342	291.877	840.254	1334.33	168.745	477.122	68.2912						2.30322	4.07655	0.23663	2.84416	1.13345	1.38707	1.99685	0.55835					1652.42	1824.21	523.281	680.332	769.58	2004.65					1.02366	0.423001	2.28558	0.803331	2.41353	4.25977	1.86814	0.581005
116	345	321.209	835.495	1266.92	117.803	478.362	82.1724						2.63517	4.0478	0.174161	1.68365	1.13899	1.87227	1.92534	0.540212					1429.96	1871.27	504.574	661.998	694.579	2032.61					0.751213	0.459715	2.16812	0.754733	2.08086	4.33315	1.75796	0.594686
117	348	294.328	868.162	1361.71	108.968	491.236	66.5862						2.33096	4.24516	0.262008	1.48237	1.19656	1.32747	1.80742	0.557199					1619.72	1714.62	509.065	657.809	754.34	2020.58					0.983614	0.337518	2.19632	0.74363	2.34593	4.30157	1.8181	0.595323
118	351	312.368	842.356	1353.4	114.244	507	83.1264						2.53512	4.08925	0.254308	1.60257	1.26705	1.90562	1.94232	0.528611					1621.1	1851.47	500.912	641.458	727.737	1929.11					0.985297	0.44427	2.14513	0.70029	2.22793	4.06157	1.76075	0.551326
119	354	329.77	781.274	1291.51	112.441	506.67	73.6552						2.73206	3.72021	0.196952	1.5615	1.26557	1.57456	1.84181	0.500284					1604.11	1918.88	499.008	618.201	687.112	1937.1					0.964496	0.49685	2.13318	0.638642	2.04773	4.08255	1.72724	0.550626
120	357	365.258	810.026	1273.26	122.541	496.017	74.1111						3.13368	3.89392	0.180036	1.79159	1.21794	1.5905	1.96794	0.547754					1563.23	1849.01	494.932	603.771	614.013	1916.41					0.914432	0.442346	2.10758	0.600394	1.7235	4.02826	1.63609	0.546836
121	360	306.985	780.838	1197.35	131.129	488.505	66.705						2.47419	3.71758	0.109681	1.98723	1.18435	1.33162	1.80078	0.504059					1284.8	1876	488.663	607.119	632.605	1897.34					0.573447	0.463405	2.06822	0.609267	1.80596	3.97822	1.58309	0.55507
122	363	305.736	744.419	1153.65	100.491	466.936	81.3678						2.46007	3.49755	0.069181	1.28927	1.0879	1.84415	1.70802	0.484156					1448.62	1834.81	472.3	596	652.378	1809.55					0.774065	0.431269	1.96548	0.579796	1.89367	3.74788	1.56536	0.513645
123	366	321.224	826.178	1212.78	99.8638	426.413	63.8008						2.63534	3.99151	0.123982	1.27498	0.906706	1.23011	1.69377	0.56687					1430.43	1774.68	485.704	581.077	634.792	1694.13					0.751796	0.384363	2.04964	0.540239	1.81567	3.44504	1.49779	0.479948
124	369	272.764	818.634	1293.11	101.968	382.94	52.2912						2.08691	3.94593	0.198431	1.32291	0.712315	0.827799	1.51572	0.551461					1427.25	1750.36	488.264	586.934	609.275	1594.17					0.747899	0.365395	2.06571	0.555766	1.70248	3.18277	1.43667	0.443968
125	372	302.325	793.746	1328.05	107.613	432.493	65.8046						2.42146	3.79556	0.230816	1.45151	0.933889	1.30015	1.6889	0.512452					1338.38	1756.89	483.284	584.84	583.351	1495.96					0.63907	0.370486	2.03445	0.550213	1.58749	2.92509	1.35113	0.412727
126	375	265.88	759.531	1386.79	88.0072	418.839	60.9847						2.00901	3.58885	0.28525	1.00488	0.872839	1.13167	1.48208	0.478547					1333.47	1724.82	485.712	571.503	567.968	1665.67					0.633056	0.345472	2.04969	0.514863	1.51926	3.37037	1.40545	0.476173
127	378	298.344	802.175	1357.55	111.341	415.702	49.6513						2.3764	3.84649	0.258152	1.53643	0.858812	0.735523	1.60197	0.540085					1355.98	1721.2	494.735	561.111	555.849	1455.68					0.660615	0.342649	2.10634	0.487316	1.46551	2.8194	1.31364	0.407056
128	381	328.549	787.34	1330.26	85.7419	421.887	55.9004						2.71824	3.75686	0.232859	0.953271	0.886464	0.953956	1.58361	0.551203					1265.73	1694.02	494.681	551.573	528.342	1448.39					0.550097	0.321446	2.10601	0.462036	1.3435	2.80028	1.26389	0.412984
129	384	287.276	774.805	1367.75	120.039	453.747	89.4368						2.25115	3.68113	0.267609	1.7346	1.02893	2.1262	1.84827	0.475453					1337.85	1630.79	500.203	548.329	517.032	1511.88					0.638417	0.27212	2.14068	0.453435	1.29333	2.96686	1.29414	0.435733
130	387	304.607	754.307	1304.52	97.8889	422.754	69.7548						2.44729	3.55728	0.209008	1.22999	0.890343	1.43823	1.62869	0.48804					1266.46	1678.57	494.555	537.638	501.711	1407.11					0.55099	0.309396	2.10522	0.425098	1.22537	2.69196	1.21801	0.402447
131	390	304.531	755.158	1367.76	90.4229	401.146	60.2222						2.44642	3.56243	0.267617	1.05991	0.793722	1.10502	1.53919	0.500247					1157.49	1618.65	504.548	517.214	481.882	1408.7					0.417533	0.262653	2.16796	0.370961	1.13742	2.69612	1.17544	0.422445
132	393	299.377	742.139	1310.55	96.3979	389.829	45.8353						2.3881	3.48377	0.214597	1.19602	0.743118	0.602138	1.43796	0.510707					1091.09	1585.36	503.421	536.773	466.677	1456.28					0.336216	0.236687	2.16088	0.422803	1.06998	2.82096	1.17459	0.441285
133	396	308.607	699.845	1339.14	81.6416	383.068	66.0536						2.49256	3.22824	0.241095	0.859863	0.71289	1.30885	1.47392	0.469702					1123.27	1440.78	510.74	520.156	453.025	1417.81					0.37563	0.123899	2.20684	0.378758	1.00942	2.72003	1.13576	0.441504
134	399	301.617	727.521	1075.47	84.0681	388.113	69.9502						2.41344	3.39546	-0.00327733	0.915141	0.735449	1.44506	1.48354	0.503818					1165.62	1587.65	553.547	526.39	439.558	1340.78					0.427487	0.23847	2.47561	0.395283	0.949689	2.51794	1.16741	0.431637
135	402	283.969	668.581	1148.26	88.362	358.812	67.6398						2.21373	3.03936	0.0641885	1.01296	0.604425	1.3643	1.38316	0.444085					1155.79	1419.43	528.537	529.567	435.842	1397.11					0.415458	0.10725	2.31858	0.403704	0.933209	2.66573	1.14066	0.443221
136	405	286.469	678.053	1159.39	117.018	354.064	44.4444						2.24202	3.09658	0.074504	1.66576	0.583197	0.55352	1.36926	0.47585					1124.34	1543.27	550.392	523.808	410.816	1445.48					0.376932	0.203851	2.4558	0.388439	0.822201	2.79263	1.17331	0.468343
137	408	311.617	671.838	1095.43	90.5484	359.325	53.6935						2.52662	3.05904	0.0152221	1.06277	0.606723	0.876815	1.35786	0.481157					1036.6	1418.6	563.864	543.687	407.696	1373.77					0.269487	0.106601	2.54039	0.441132	0.808363	2.60449	1.12841	0.466516
138	411	303.5	681.762	1104.08	87.8208	388.717	31.4291						2.43476	3.11899	0.0232448	1.00063	0.738148	0.0985803	1.23573	0.518023					994.533	1467.61	580.91	535.472	399.887	1357.68					0.217967	0.144828	2.64742	0.419357	0.773726	2.56228	1.1276	0.475684
139	414	299.905	699.696	1099.82	84.1255	349.281	32.3487						2.39407	3.22735	0.0192919	0.916448	0.561807	0.130724	1.20828	0.534186					1029.17	1421.43	574.124	513.385	375.692	1290.12					0.260385	0.108805	2.60481	0.360812	0.666408	2.38501	1.06437	0.459344
140	417	290.344	695.865	1123.57	88.7455	337.302	35.7471						2.28587	3.2042	0.041309	1.0217	0.508245	0.249513	1.21847	0.514787					945.886	1539.63	559.621	523.81	376.57	1326.18					0.158391	0.201011	2.51375	0.388445	0.670302	2.47962	1.06859	0.457599
141	420	291.819	645.838	975.53	109.796	328.737	35.1992						2.30256	2.90195	-0.0958951	1.50124	0.469945	0.230361	1.21836	0.495094					924.79	1466.3	568.25	525.356	366.173	1304.09					0.132556	0.143809	2.56793	0.392543	0.624187	2.42166	1.04711	0.464111
142	423	278.702	696.924	883.774	97.7348	360.848	28.8927						2.15412	3.2106	-0.180934	1.22648	0.613531	0.00992234	1.17229	0.535915					904.929	1463.04	583.137	527.976	365.652	1248.63					0.108233	0.141267	2.66141	0.399486	0.621874	2.27614	1.03473	0.462524
143	426	311.362	696.442	901.939	83.5627	336.405	37.4291						2.52373	3.20769	-0.164098	0.903627	0.504233	0.308306	1.21391	0.548018					936.11	1435	572.168	525.127	337.19	1244.13					0.146419	0.119391	2.59253	0.391936	0.49563	2.26434	1.00171	0.456906
144	429	333.524	692.597	833.017	96.871	353.154	32.023						2.77455	3.18446	-0.227974	1.2068	0.579128	0.11934	1.27272	0.576715					951.656	1438.87	555.19	515.508	344.952	1161.35					0.165458	0.122409	2.48593	0.366438	0.530059	2.04715	0.952907	0.42348
145	432	266.564	753.584	777.117	95.405	331.959	37.3218						2.01675	3.55292	-0.279781	1.1734	0.484355	0.304555	1.2087	0.568838					943.499	1475.46	535.486	526.088	339.179	1133.04					0.155468	0.150958	2.36221	0.394483	0.504451	1.97285	0.923404	0.400549
146	435	310.555	790.571	796.543	96.1183	358.197	27.7586						2.5146	3.77638	-0.261777	1.18965	0.601677	-0.0297193	1.29847	0.640699					964.016	1482.13	510.051	521.218	325.248	1159.6					0.180594	0.156157	2.20251	0.381574	0.442663	2.04254	0.901007	0.389474
147	438	280.295	813.753	797.552	78.6774	341.647	30.977						2.17214	3.91644	-0.260842	0.792336	0.527672	0.0827775	1.20509	0.640947					968.484	1436.07	487.242	524.565	320.736	1180.18					0.186067	0.12023	2.0593	0.390445	0.422649	2.09653	0.879204	0.382026
148	441	314.73	767.67	711.561	83.6738	359.615	23.3295						2.56185	3.63802	-0.340538	0.906158	0.608016	-0.184535	1.19816	0.646156					962.655	1540.41	462.97	527.384	334.269	1161.81					0.178927	0.201624	1.9069	0.397917	0.482674	2.04833	0.869396	0.354063
149	444	305.319	707.954	732.017	103.398	324.274	35.9387						2.45534	3.27723	-0.321579	1.35549	0.449991	0.25621	1.24545	0.567774					999.371	1392.2	477.198	525.022	326.571	1178.69					0.223893	0.0860035	1.99623	0.391657	0.448529	2.09264	0.87316	0.374244
150	447	367.874	646.201	683.356	81.8136	356.026	32.1647						3.16329	2.90414	-0.366677	0.863781	0.591968	0.124293	1.21347	0.60144					992.593	1427.33	462.768	528.739	333.222	1194.61					0.215592	0.113414	1.90563	0.40151	0.478028	2.1344	0.874762	0.367192
151	450	300.801	602.254	762.974	91.5771	326.775	35.4981						2.40421	2.63863	-0.292889	1.0862	0.461174	0.240809	1.08969	0.488342					1017.44	1425.75	453.928	525.795	346.6	1182.34					0.246025	0.112178	1.85013	0.393705	0.537369	2.1022	0.873601	0.354966
152	453	347.485	639.941	677.417	90.914	345.711	16.1379						2.93254	2.86632	-0.372181	1.0711	0.545845	-0.435912	1.10128	0.614067					1018.85	1404	449.002	525.589	333.483	1186.71					0.247753	0.0952144	1.8192	0.39316	0.479185	2.11368	0.858031	0.356579
153	456	355.003	596.129	749.97	104.961	347.334	36.9004						3.01763	2.60162	-0.304941	1.39109	0.553103	0.289825	1.25805	0.54149					1006.76	1410.92	437.968	515.847	347.345	1179.32					0.232944	0.100607	1.74992	0.367336	0.540675	2.09428	0.847627	0.347805
154	459	339.181	602.858	642	84.8136	338.762	33.9579						2.83857	2.64228	-0.405005	0.932124	0.514775	0.186973	1.11829	0.543708					1060.65	1431.33	441.408	520.391	351.892	1161.69					0.298936	0.116527	1.77152	0.379382	0.560841	2.04802	0.862537	0.338145
155	462	324.945	577.759	703.004	95.595	336.814	34.4789						2.67745	2.49064	-0.348468	1.17773	0.506062	0.205184	1.1181	0.505893					1041.7	1497.96	445.661	518.59	347.509	1166.78					0.275732	0.168506	1.79822	0.374608	0.541399	2.0614	0.869976	0.340571
156	465	333.543	589.01	726.609	91.9176	345.893	19.3946						2.77476	2.55861	-0.326592	1.09396	0.546659	-0.322077	1.05422	0.556282					1027.57	1479.44	442.622	522.847	346.685	1151.83					0.258423	0.154057	1.77914	0.385891	0.537747	2.02215	0.856235	0.335867
157	468	335.396	539.911	720.991	72.9498	344.484	19.4444						2.79573	2.26197	-0.331798	0.661857	0.540359	-0.320336	0.93463	0.536475					1039.06	1490.09	442.481	516.115	337.33	1155.2					0.2725	0.162364	1.77825	0.368046	0.49625	2.031	0.851402	0.337647
158	471	317.822	537.888	706.861	55.3011	361.101	19.6207						2.59684	2.24975	-0.344894	0.259805	0.61466	-0.314173	0.843665	0.522727					1050.32	1496.07	444.837	525.232	330.332	1138.91					0.286293	0.167029	1.79305	0.392214	0.465209	1.98826	0.848676	0.333008
159	474	348.853	556.511	715.361	67.0323	351.608	25.023						2.94802	2.36227	-0.337016	0.527051	0.572215	-0.12534	0.9912	0.551083					1050.61	1488.94	444.453	523.364	339.469	1119.66					0.286642	0.161467	1.79064	0.387262	0.505736	1.93776	0.844918	0.326188
160	477	324.718	520.993	744.822	56.7383	361.507	35.6858						2.67488	2.14768	-0.309712	0.292545	0.61648	0.24737	0.944874	0.484202					1046.16	1479.42	448.476	527.212	340.748	1134.99					0.281196	0.154048	1.81589	0.397463	0.51141	1.97797	0.856329	0.333283
161	480	365.012	526.36	791.122	62.2939	333.514	24.4598						3.1309	2.1801	-0.266802	0.419106	0.491307	-0.145026	0.968265	0.560934					1054.45	1477.76	454.995	513.573	331.487	1156.71					0.291341	0.152748	1.85683	0.361309	0.470333	2.03496	0.861252	0.346328
162	483	323.227	534.713	759.017	51.9785	340.422	18.7969						2.65801	2.23057	-0.296556	0.184113	0.522195	-0.342969	0.825894	0.531037					1067.36	1511.79	456.269	523.176	357.823	1140.58					0.30716	0.179296	1.86483	0.386764	0.587151	1.99264	0.886307	0.334454
163	486	323.163	531.554	803.748	58.2151	348.955	20.751						2.65728	2.21148	-0.2551	0.326188	0.560351	-0.274665	0.870924	0.515159					1060.54	1494.88	471.267	519.784	339.156	1142.73					0.2988	0.166106	1.959	0.377774	0.50435	1.99828	0.884052	0.349069
164	489	348.117	502.36	787.078	53.1398	364.814	14.4981						2.93969	2.0351	-0.270549	0.210568	0.631264	-0.49323	0.842141	0.556403					1072.43	1512.24	461.691	524.861	327.132	1122.25					0.31337	0.179648	1.89887	0.39123	0.451015	1.94456	0.863114	0.336855
165	492	365.141	469.911	829.565	85.6308	373.739	9.9923						3.13236	1.83905	-0.231173	0.95074	0.671172	-0.650727	0.951905	0.565342					1068.45	1525.69	462.136	504.428	332.638	1138.09					0.308486	0.19014	1.90166	0.337069	0.475439	1.98609	0.866482	0.342886
166	495	337.939	448.017	841.117	56.405	385.068	18.682						2.82451	1.70677	-0.220467	0.284952	0.721833	-0.346985	0.828436	0.501475					1095.99	1526.95	480.678	520.1	334.959	1132.24					0.342214	0.191118	2.01808	0.378611	0.485735	1.97077	0.897755	0.348985
167	498	314.015	446.779	796.822	74.6129	371.764	23.5287						2.55376	1.6993	-0.261519	0.699743	0.662344	-0.177572	0.862676	0.446181					1090.06	1522.74	464.851	525.359	337.582	1115.24					0.334955	0.187839	1.91871	0.392549	0.49737	1.92617	0.876264	0.33334
168	501	329.476	475.531	820.848	88.1004	345.268	23.5211						2.72873	1.87301	-0.239252	1.007	0.543864	-0.177838	0.955919	0.478544					1094.41	1521.97	489.013	522.451	338.644	1123.52					0.340282	0.187239	2.07042	0.384842	0.502077	1.94787	0.905456	0.351795
169	504	316.546	483.353	780.722	74.8351	378.542	22.4483						2.5824	1.92027	-0.276441	0.704805	0.692648	-0.215337	0.901391	0.468348					1103.47	1540.71	499.022	527.044	336.416	1091.46					0.351377	0.201852	2.13326	0.397017	0.492195	1.86377	0.906578	0.349152
170	507	335.255	454.046	867.052	81.9713	350.799	23.3908						2.79413	1.7432	-0.196431	0.867374	0.568596	-0.182392	0.932413	0.475291					1127.17	1513.61	535.368	511.028	327.695	1087.18					0.380409	0.180711	2.36147	0.354564	0.453513	1.85254	0.930535	0.379554
171	510	326.644	437.135	842.387	72.7491	378.383	22.8199						2.69669	1.64103	-0.21929	0.657285	0.69194	-0.202348	0.877551	0.459868					1100.66	1539.03	549.933	526.257	333.023	1097.52					0.347941	0.200543	2.45292	0.39493	0.477149	1.87966	0.958857	0.390658
172	513	356.095	423.842	898.139	72.0896	360.64	27.4674						3.02999	1.56072	-0.16762	0.642261	0.612602	-0.0398979	0.939675	0.487722					1081.93	1543.03	569.268	506.537	328.455	1093.98					0.325003	0.203661	2.57432	0.34266	0.456886	1.87038	0.962153	0.410053
173	516	319.555	453.482	835.909	81.2366	363.265	17.4138						2.61646	1.73979	-0.225294	0.850637	0.624341	-0.391314	0.869104	0.471097					1117.47	1538.3	586.66	512.19	337.986	1076.17					0.368527	0.199977	2.68352	0.357645	0.499158	1.82365	0.988746	0.416899
174	519	314.589	402.538	817.735	76.4695	360.735	14.6628						2.56025	1.43201	-0.242137	0.742038	0.613023	-0.487473	0.769619	0.457324					1149.45	1511.85	578.841	510.566	346.005	1075.56					0.407687	0.179342	2.63443	0.353338	0.534729	1.82204	0.988594	0.408464
175	522	318.359	376.68	888.63	81.957	364.118	13.1303						2.60292	1.27578	-0.176433	0.867048	0.628152	-0.54104	0.776071	0.456774					1120.26	1528.67	576.922	519.287	323.357	1066.29					0.371936	0.192461	2.62238	0.376454	0.434273	1.79771	0.965869	0.408938
176	525	285.006	422.304	930.691	89.6057	352.358	26.3257						2.22546	1.55143	-0.137451	1.04129	0.575566	-0.0798052	0.862748	0.380106					1125.13	1545.02	563.911	519.626	334.084	1065.72					0.377905	0.205218	2.54069	0.377355	0.481851	1.79622	0.963207	0.394733
177	528	308.129	399.62	908.126	84.2115	341.644	18.4406						2.48714	1.41438	-0.158364	0.918407	0.527663	-0.355423	0.805635	0.430712					1119.75	1553.18	584.728	510.408	328.665	1065.89					0.37132	0.211584	2.67139	0.352919	0.457818	1.79667	0.97695	0.41451
178	531	309.712	373.845	947.052	75.9426	369.437	14.3793						2.50506	1.25865	-0.122288	0.730035	0.651936	-0.497383	0.754335	0.434577					1132.49	1569.88	571.015	516.488	323.582	1064.42					0.386918	0.224611	2.58529	0.369037	0.435272	1.79281	0.965656	0.401196
179	534	303.859	374.67	929.087	89.6667	355.666	14.4521						2.43882	1.26364	-0.138938	1.04268	0.59036	-0.494838	0.783621	0.430509					1153.38	1564.99	558.113	516.069	324.42	1054.9					0.412502	0.220791	2.50428	0.367925	0.438985	1.76782	0.952052	0.387522
180	537	306.393	327.214	937.226	89.595	366.373	25.1188						2.46749	0.976927	-0.131395	1.04105	0.638234	-0.121991	0.81172	0.392125					1120.65	1525.97	543.995	513.22	332.104	1056.71					0.372419	0.190354	2.41564	0.360373	0.473071	1.7726	0.930742	0.37896
181	540	314.613	344.333	1047.58	76.1864	365.833	24.7165						2.56053	1.08035	-0.0291225	0.735589	0.635821	-0.136054	0.807853	0.39885					1143.01	1537.23	516.308	532.447	328.007	1059.91					0.399806	0.199136	2.2418	0.411338	0.454897	1.78099	0.91466	0.353722
182	543	300.613	313.152	977.13	81.6272	375.82	15.2146						2.40209	0.891965	-0.0944123	0.859535	0.680479	-0.468185	0.711912	0.406395					1133.58	1561.09	518.399	503.203	320.483	1031.17					0.388255	0.217752	2.25493	0.333822	0.421523	1.70558	0.886975	0.354053
183	546	329.402	301.389	1021.17	96.0574	364.777	18.9808						2.72789	0.8209	-0.0535976	1.18827	0.631101	-0.336541	0.829671	0.443906					1139.79	1584.84	490.253	521.06	331.875	1044.21					0.395863	0.236275	2.0782	0.381155	0.472056	1.73978	0.88389	0.328576
184	549	347.135	304.459	1010.9	92.2366	317.306	32.4368						2.92858	0.839444	-0.0631112	1.10123	0.418834	0.133804	0.89313	0.443666					1171.74	1569.84	479.42	526.711	329.986	991.698					0.434988	0.224574	2.01018	0.396134	0.463674	1.60201	0.85526	0.307138
185	552	272.077	421.261	1103.89	78.8459	376.278	29.6054						2.07914	1.54512	0.0230635	0.796175	0.682528	0.0348342	0.860143	0.335292					1167.16	1557.39	458.708	510.483	328.991	1011.11					0.429374	0.214863	1.88014	0.353118	0.459263	1.65293	0.831614	0.299096
186	555	345.15	487.182	1054.83	88.1111	356.878	23.931						2.90612	1.9434	-0.0224013	1.00724	0.595779	-0.16351	1.04444	0.485591					1147.57	1577.91	455.17	535.121	321.732	1003.23					0.405381	0.230869	1.85792	0.418425	0.427065	1.63226	0.828653	0.292759
187	558	295.187	519.617	1012.87	85.0538	350.561	36.7931						2.34068	2.13936	-0.0612899	0.937596	0.567533	0.286075	1.03499	0.40477					1145.9	1567.03	452.224	516.69	328.036	1022.86					0.403346	0.222384	1.83943	0.36957	0.455028	1.68376	0.828919	0.297303
188	561	344.298	520.644	1039.21	104.079	367.707	23.364						2.89647	2.14556	-0.0368792	1.371	0.644199	-0.183329	1.1395	0.501058					1163.8	1565.09	452.406	516.735	326.466	1000.53					0.425268	0.220872	1.84057	0.36969	0.448062	1.62519	0.821608	0.291305
189	564	312.626	498.743	1060.64	83.5663	365.403	28.8123						2.53804	2.01325	-0.0170139	0.903709	0.633897	0.00711202	1.01316	0.430296					1168.88	1580.65	449.737	515.516	328.468	978.388					0.43148	0.233012	1.82381	0.366459	0.456943	1.56708	0.813132	0.282755
190	567	289.38	484.152	1111.83	105.581	360.91	28.6705						2.27496	1.92509	0.0304212	1.40521	0.613809	0.00215551	1.04194	0.396648					1157.32	1582.34	441.337	513.55	322.382	1010.46					0.417327	0.23433	1.77107	0.361248	0.429946	1.65123	0.810859	0.286516
191	570	310.638	510.766	1055.39	90.276	358.848	35.6437						2.51554	2.08589	-0.0218855	1.05656	0.604588	0.245898	1.0811	0.416694					1163.19	1545.14	460.434	543.446	329.9	997.144					0.424517	0.205313	1.89097	0.440493	0.463293	1.61629	0.840147	0.293493
192	573	318.156	482.327	1049.95	119.276	342.582	25.4751						2.60063	1.91407	-0.0269263	1.71721	0.531856	-0.109537	1.10455	0.460114					1177.39	1531.38	457.583	509.866	328.323	985.652					0.441907	0.194579	1.87308	0.351485	0.4563	1.58614	0.817248	0.293359
193	576	350.896	448.729	986.539	104.405	368.505	29.9847						2.97114	1.71108	-0.0856925	1.37843	0.647771	0.0480924	1.1118	0.471458					1174.37	1586.72	454.573	521.771	322.139	995.347					0.438212	0.237747	1.85417	0.383039	0.428869	1.61158	0.825604	0.290094
194	579	325.586	441.439	1051.67	87.8315	343.767	37.4215						2.68471	1.66703	-0.0253348	1.00087	0.537152	0.30804	1.02875	0.409169					1170.72	1551.1	464.073	530.436	324.831	987.925					0.433739	0.209961	1.91382	0.406008	0.440812	1.59211	0.832742	0.295981
195	582	322.252	424.627	1066.8	81.4158	335.229	33.7471						2.64697	1.56546	-0.0113081	0.854719	0.498976	0.179604	0.955738	0.407776					1183.85	1558.63	445.315	527.891	337.048	959.42					0.449819	0.215831	1.79605	0.399262	0.495002	1.51732	0.812213	0.272228
196	585	319.712	453.719	1125.45	95.6487	353.216	26.1188						2.61823	1.74123	0.0430497	1.17896	0.579406	-0.0870372	1.01231	0.427142					1175.89	1556.11	442.847	530.275	326.637	973.896					0.44007	0.213866	1.78055	0.40558	0.448823	1.5553	0.807364	0.2759
197	588	336.034	426.789	1081.11	87.957	372.383	41						2.80295	1.57852	0.00195287	1.00373	0.665111	0.433124	1.0809	0.407253					1163.56	1557.43	480.493	520.393	327.58	979.72					0.424967	0.214895	2.01693	0.379388	0.453006	1.57058	0.843293	0.307884
198	591	345.476	414.248	1088.6	90.9498	351.518	30.1379						2.9098	1.50275	0.00889577	1.07191	0.571813	0.0534474	1.01977	0.44589					1148.14	1544.36	514.336	521.268	326.507	977.035					0.406083	0.204703	2.22942	0.381706	0.448247	1.56353	0.872282	0.336805
199	594	339.933	456.66	1041.98	71.7061	379.627	39.8123						2.84707	1.759	-0.0343083	0.633524	0.697503	0.391609	1.04907	0.433553					1168.95	1554.55	550.07	525.327	332.007	970.138					0.431568	0.212648	2.45378	0.392465	0.472639	1.54544	0.91809	0.363363
200	597	367.951	392.842	1119.32	76.7814	363.91	31.59						3.16416	1.37343	0.0373641	0.749144	0.627223	0.104204	1.00925	0.474466					1167.96	1549.34	566.106	532.636	334.497	966.949					0.430358	0.208587	2.55447	0.411839	0.483684	1.53707	0.937667	0.376158
201	600	318.083	394.3	1097.54	90.8531	361.752	34.2261						2.59979	1.38224	0.0171845	1.06971	0.617571	0.196347	0.980474	0.385835					1197.04	1529.29	556.503	531.007	318.582	986.88					0.465973	0.192946	2.49417	0.407521	0.413091	1.58936	0.927178	0.373278
202	603	344.982	397.393	1154.57	90.2401	381.895	49.2452						2.90421	1.40092	0.0700312	1.05574	0.707643	0.721328	1.14331	0.395584					1159.68	1534.12	544.513	522.006	330.624	943.357					0.420221	0.196711	2.41889	0.383661	0.466506	1.47517	0.893527	0.356694
203	606	320.69	365.37	1151.88	78.9713	363.443	38.6398						2.6293	1.20745	0.067541	0.799031	0.625136	0.350625	0.946514	0.372047					1165.87	1526.25	536.118	522.568	322.175	967.069					0.427802	0.190571	2.36618	0.385152	0.429032	1.53738	0.889353	0.35442
204	609	314.764	359.112	1067.07	93.0394	385.48	34.5632						2.56223	1.16964	-0.0110582	1.11951	0.723671	0.20813	0.962022	0.374194					1176.39	1538.7	516.305	514.169	326.1	943.783					0.440679	0.200289	2.24178	0.362889	0.446438	1.47629	0.861393	0.332581
205	612	327.132	393.898	1091.71	90.7097	364.925	43.7701						2.7022	1.37981	0.0117769	1.06644	0.631761	0.529951	1.05366	0.381315					1162.29	1528.86	495.631	519.693	331.719	965.739					0.423416	0.192609	2.11197	0.377531	0.471362	1.5339	0.851797	0.318381
206	615	343.58	361.304	1059.41	83.2796	363.028	44.4023						2.88835	1.18288	-0.0181582	0.897178	0.623278	0.552049	1.02093	0.407696					1179.41	1535.28	477.377	525.471	325.452	980.911					0.444383	0.197618	1.99735	0.392846	0.443567	1.5737	0.841579	0.305726
207	618	314.936	304.624	1130.02	82.6631	354.649	50.364						2.56418	0.840441	0.0472847	0.883134	0.585811	0.760435	0.94688	0.346672					1170.78	1525.52	453.818	524.524	319.001	988.811					0.433812	0.190002	1.84943	0.390336	0.414952	1.59443	0.812161	0.291766
208	621	350.647	324.429	1114.33	93.2222	386.906	56.4713						2.96833	0.960098	0.0327382	1.12368	0.730048	0.973911	1.13147	0.399861					1179.37	1546.34	445.507	519.686	320.451	958.461					0.444332	0.206244	1.79725	0.377514	0.421382	1.5148	0.793588	0.277254
209	624	306.564	277.531	1109.87	79.8387	344.099	46.5862						2.46944	0.676757	0.028608	0.818791	0.538636	0.628385	0.860103	0.340279					1192.02	1515.8	435.972	504.768	318.085	955.966					0.459824	0.182423	1.73738	0.33797	0.410889	1.50825	0.77279	0.273122
210	627	305.478	308.356	1094.25	88.7133	388.644	46.4904						2.45715	0.862992	0.0141301	1.02096	0.737823	0.625037	0.953016	0.332191					1188.98	1542.12	427.9	520.61	325.606	942.568					0.456101	0.202954	1.6867	0.379962	0.444246	1.4731	0.773844	0.259031
211	630	292.325	307.97	1055.62	81.9355	403.683	44.6207						2.30829	0.86066	-0.0216679	0.866558	0.805068	0.559683	0.896432	0.314122					1167.39	1512.82	478.539	519.861	314.989	949.569					0.429657	0.180098	2.00465	0.377977	0.397158	1.49147	0.813502	0.304962
212	633	330.478	270.634	1064.67	104.165	385.989	57.5977						2.74008	0.635084	-0.0132825	1.37296	0.72595	1.01328	1.07901	0.381432					1180.26	1515.72	510.105	525.404	330.636	955.382					0.445415	0.182357	2.20285	0.392668	0.466558	1.50672	0.866095	0.327899
213	636	316.31	255.142	1085.34	87.3333	384.606	46.9502						2.57973	0.541487	0.00587771	0.989525	0.719765	0.641109	0.912915	0.358515					1168.3	1497.53	519.497	535.959	328.005	962.7					0.430771	0.168169	2.26182	0.420647	0.454889	1.52592	0.877036	0.337976
214	639	302.948	273.795	1019.74	103.344	395.068	52.6897						2.42851	0.654186	-0.0549192	1.35426	0.766548	0.841728	0.998386	0.340496					1152.79	1500.16	541.256	537.318	324.252	932.483					0.411779	0.17022	2.39844	0.42425	0.438242	1.44664	0.881595	0.353676
215	642	283.632	220	1034.45	79.6846	382.57	29.3027						2.20991	0.329171	-0.0412915	0.815281	0.710659	0.0242536	0.674663	0.338282					1183.76	1494.07	545.021	533.908	321.74	942.511					0.449711	0.16547	2.42208	0.415212	0.427099	1.47295	0.892087	0.35803
216	645	323.908	232.221	1015.14	84.3728	377.979	50.6054						2.66572	0.403007	-0.0591824	0.922082	0.69013	0.768873	0.898438	0.380636					1187.93	1512.76	540.91	533.609	322.606	942.836					0.454808	0.180055	2.39627	0.414418	0.43094	1.4738	0.891716	0.353081
217	648	294.15	198.571	967.048	92.509	372.799	44.4751						2.32895	0.199703	-0.103757	1.10743	0.666968	0.554593	0.792314	0.350566					1179.08	1487.53	517.896	529.523	323.703	924.766					0.443975	0.160368	2.25177	0.403587	0.435808	1.42639	0.85365	0.332084
218	651	302.377	224.99	1037.77	89.0143	396.501	43.3448						2.42205	0.359319	-0.0382131	1.02782	0.772954	0.515085	0.843169	0.348831					1183.33	1472.94	531.024	524.262	327.351	941.078					0.449174	0.148992	2.3342	0.389643	0.451988	1.46919	0.873864	0.346662
219	654	297.81	235.786	1025.07	113.179	390.692	50.2031						2.37036	0.424542	-0.0499872	1.57832	0.746977	0.754811	0.970837	0.35426					1204.77	1499.49	534.243	525.887	330.876	939.785					0.475434	0.169699	2.35441	0.39395	0.467625	1.4658	0.887819	0.345985
220	657	275.522	208.739	1047.01	97.3405	396.281	45.4368						2.11812	0.261137	-0.0296463	1.2175	0.771967	0.588209	0.821214	0.312697					1199.23	1482.72	514.763	539.389	324.019	951.485					0.468653	0.15662	2.23209	0.429738	0.437211	1.49649	0.870135	0.331608
221	660	314.997	201.317	1075.17	89.8064	445.867	64.1839						2.56487	0.216293	-0.00355537	1.04586	0.993694	1.2435	1.01011	0.371078					1198.62	1505.45	528.285	530.496	320.596	930.728					0.467903	0.174347	2.317	0.406167	0.422026	1.44203	0.871579	0.340708
222	663	309.571	198.64	1088.3	78.1039	404.407	35.2299						2.50346	0.200122	0.00861774	0.779271	0.808304	0.231434	0.755202	0.37415					1158.51	1496.72	532.742	527.131	316.523	954.903					0.41878	0.167541	2.34498	0.397247	0.40396	1.50546	0.872996	0.351998
223	666	309.936	172.522	1148.95	86.2903	375.242	25.9349						2.50759	0.0423206	0.0648252	0.965764	0.677894	-0.0934653	0.694155	0.400162					1187.69	1488.06	544.104	526.583	328.957	930.073					0.454514	0.16078	2.41632	0.395794	0.45911	1.44032	0.887806	0.355143
224	669	262.298	190.845	1175.43	95.0107	402.195	37.1877						1.96846	0.153025	0.0893687	1.16442	0.798413	0.299868	0.745593	0.297437					1183.63	1500.7	530.599	521.037	317.299	928.883					0.449549	0.170646	2.33153	0.381094	0.4074	1.43719	0.862902	0.345272
225	672	292.902	162.746	1127.2	83.724	399.317	38.1609						2.31482	-0.0167405	0.0446696	0.907302	0.785545	0.333885	0.728246	0.352626					1198.98	1463.92	552.051	522.185	328.197	942.182					0.468342	0.141955	2.46622	0.384136	0.455739	1.47209	0.898079	0.365365
226	675	299.592	167.033	1071.6	91.6774	372.807	35.9502						2.39053	0.00916081	-0.00685953	1.08849	0.667007	0.256612	0.734156	0.373113					1189.19	1471.53	543.865	514.329	311.184	929.608					0.45636	0.14789	2.41482	0.363314	0.38028	1.43909	0.86696	0.360526
227	678	280.478	171.495	1088.2	87.6846	401.071	41.9617						2.17422	0.0361194	0.00852905	0.997528	0.793387	0.466739	0.746087	0.328182					1191.23	1429.81	533.144	525.777	321.974	925.296					0.458861	0.115344	2.34751	0.393659	0.428137	1.42778	0.861881	0.349019
228	681	301.159	135.432	1151.22	96.5556	427.97	47.9464						2.40827	-0.181761	0.0669285	1.19962	0.913667	0.67593	0.847109	0.376938					1152.22	1460.99	494.727	519.805	328.921	937.773					0.411075	0.139666	2.1063	0.377828	0.458954	1.46052	0.825723	0.31731
229	684	292.54	181.069	1171.06	112.817	377.852	39.9042						2.31072	0.0939637	0.0853191	1.57007	0.689565	0.394821	0.85741	0.367021					1147.35	1456	488.762	532.03	321.223	952.409					0.405119	0.135774	2.06884	0.410233	0.424806	1.49892	0.823948	0.315426
230	687	303.42	158.762	1119.01	111.606	388.229	48.5249						2.43386	-0.0408076	0.0370821	1.54247	0.735965	0.696151	0.900786	0.385733					1142.6	1460.88	459.773	512.53	331.236	936.325					0.399303	0.139583	1.88682	0.358545	0.469221	1.45672	0.785033	0.289375
231	690	305.589	193.911	1242.81	100.237	437.574	53.2644						2.4584	0.171549	0.151818	1.28347	0.956611	0.861817	0.980611	0.347935					1149.78	1425.62	463.695	533.134	316.896	935.239					0.408087	0.112078	1.91145	0.413158	0.405616	1.45387	0.784043	0.294016
232	693	289.098	162.069	1260.63	100.892	438.979	51.8353						2.27177	-0.0208283	0.168335	1.29841	0.962892	0.811863	0.915408	0.338331					1163.34	1428.75	443.892	513.236	328.852	931.205					0.424694	0.114518	1.78711	0.360417	0.458645	1.44329	0.764779	0.276964
233	696	267.865	177.98	1296.42	94	432.433	54.8008						2.03147	0.0753003	0.201501	1.1414	0.933621	0.91552	0.883135	0.289033					1174.87	1432	454.209	525.881	322.246	928.918					0.43882	0.117051	1.85189	0.393933	0.429343	1.43728	0.778054	0.283365
234	699	292.537	178.508	1377.57	107.85	413.818	46.4406						2.31069	0.078491	0.276708	1.4569	0.850386	0.623296	0.932745	0.338435					1169.03	1417.04	435.681	514.284	325.43	939.476					0.431666	0.105384	1.73556	0.363193	0.443468	1.46499	0.757376	0.273414
235	702	277.647	162.865	1349.99	102.194	420.854	46.8697						2.14218	-0.0160228	0.251145	1.32805	0.881849	0.638295	0.870916	0.318857					1192.21	1430.12	439.437	521.196	319.452	911.48					0.460053	0.115585	1.75914	0.381515	0.416954	1.39153	0.75413	0.268519
236	705	265.086	163.624	1424.59	98.4695	406.484	52.249						2.00002	-0.0114365	0.320287	1.24322	0.817592	0.826324	0.866	0.28867					1176.2	1398.26	427.452	513.994	312.041	912.851					0.440454	0.0907318	1.68389	0.362426	0.384081	1.39513	0.726118	0.264542
237	708	239.328	148.155	1465.24	119.806	396.377	51.341						1.70852	-0.104894	0.357962	1.72929	0.772398	0.794586	0.87631	0.298276					1164.98	1408.62	450.017	524.048	313.232	925.025					0.426705	0.0988161	1.82557	0.389076	0.389364	1.42707	0.759433	0.283056
238	711	262.08	170.924	1445.01	126.409	371.163	51.3065						1.966	0.0326696	0.339209	1.87969	0.659654	0.79338	0.9451	0.327609					1185.77	1411.54	460.878	507.379	324.876	908.966					0.452167	0.101089	1.89376	0.344892	0.441012	1.38494	0.769643	0.287425
239	714	270.574	184.314	1485.9	111.788	377.61	45.2682						2.06213	0.113564	0.377103	1.54663	0.688484	0.582315	0.895038	0.305837					1160.73	1409.34	510.151	511.073	322.984	901.981					0.421506	0.0993775	2.20314	0.354682	0.43262	1.36661	0.812989	0.329456
240	717	285.077	180.475	1451.58	101.254	389.405	42.1149						2.22626	0.090375	0.345302	1.30666	0.741222	0.472094	0.863652	0.320827					1187.65	1407.64	542.625	511.865	320.586	916.952					0.454465	0.0980521	2.40704	0.356782	0.421979	1.40589	0.857367	0.359694
241	720	302.199	170.205	1426.43	122.756	377.957	38.5096						2.42004	0.0283226	0.321987	1.79649	0.690035	0.346074	0.933825	0.389538					1169.05	1371.54	534.466	529.318	331.243	916.189					0.431693	0.0698938	2.35581	0.403045	0.469251	1.40389	0.855597	0.3513
242	723	316.472	165.168	1473.43	116.767	378.852	51.8736						2.58157	-0.00210512	0.365554	1.66005	0.694037	0.813202	1.01872	0.386012					1170.69	1419.42	544.811	515.586	320.768	929.687					0.433702	0.107244	2.42076	0.366645	0.422788	1.4393	0.865074	0.363058
243	726	281.35	184.894	1423.14	132.305	371.595	45.1647						2.18408	0.117074	0.318945	2.01401	0.661587	0.578698	0.979066	0.363458					1116.49	1402.89	536.658	526.224	325.034	928.591					0.367318	0.0943435	2.36957	0.394844	0.441713	1.43643	0.850703	0.357345
244	729	286.463	207.172	1417.97	131.061	397.651	50.5862						2.24195	0.251666	0.31415	1.98568	0.778095	0.768202	1.05662	0.347761					1161.66	1410.88	522.835	508.414	336.502	939.335					0.422645	0.100577	2.28278	0.347634	0.49258	1.46462	0.851805	0.344237
245	732	273.245	191.696	1367.89	166.914	365.366	46.2031						2.09236	0.158169	0.267734	2.80244	0.633734	0.614994	1.09491	0.444045					1158.1	1400.6	532.196	531.961	325.463	948.111					0.418278	0.0925567	2.34156	0.410051	0.443614	1.48764	0.865617	0.353491
246	735	307.264	226.267	1448.28	166.398	372.084	50.4981						2.47735	0.367036	0.342243	2.79068	0.66377	0.765123	1.23437	0.449483					1155.69	1395.75	523.707	511.276	327.702	926.1					0.415326	0.0887772	2.28826	0.35522	0.453547	1.42989	0.838503	0.345179
247	738	271.341	196.488	1360.13	192.312	364.064	47.7165						2.0708	0.187121	0.260541	3.38102	0.627912	0.667894	1.19922	0.517496					1142.88	1377.91	477.409	504.695	321.746	929.034					0.399643	0.0748619	1.99756	0.337777	0.427127	1.43759	0.779093	0.309669
248	741	282.212	239.62	1401.9	185.34	368.272	50.4176						2.19384	0.447712	0.299261	3.22221	0.646727	0.762309	1.26201	0.480587					1146.53	1363.91	464.174	522.381	321.918	928.078					0.404111	0.0639399	1.91446	0.384658	0.42789	1.43508	0.771689	0.29721
249	744	280.528	248.201	1417.1	244.215	360.101	43.3142						2.17478	0.499554	0.313344	4.56342	0.610189	0.514015	1.44588	0.683015					1142.03	1375.44	452.876	511.188	321.233	921.209					0.398602	0.0729342	1.84352	0.354988	0.424851	1.41706	0.751992	0.287772
250	747	315.617	273.987	1375.79	223.785	343.582	35.4789						2.57188	0.655342	0.275056	4.098	0.536328	0.240138	1.39613	0.647139					1146.68	1402.25	467.815	526.283	322.983	939.018					0.404298	0.0938451	1.93732	0.394999	0.432612	1.46378	0.787809	0.299302
251	750	269.598	303.449	1441.18	215.05	325.503	45.1839						2.05109	0.833343	0.335663	3.89902	0.455487	0.579369	1.35899	0.56799					1160.99	1380.43	441.146	519.376	327.615	945.46					0.421825	0.0768285	1.76987	0.376691	0.453157	1.48069	0.763176	0.280555
252	753	293.442	299.68	1403.64	262.728	341.764	29.5862						2.32093	0.810572	0.300873	4.98515	0.528199	0.0341631	1.49665	0.770853					1140.26	1373.02	436.657	524.987	334.902	929.789					0.39643	0.0710434	1.74168	0.391565	0.485484	1.43957	0.754296	0.273452
253	756	317.748	343.776	1349.43	263.807	373.904	29.4291						2.59601	1.07698	0.250625	5.00973	0.671909	0.0286718	1.60566	0.775519					1162.34	1362.72	442.804	521.55	310.875	917.622					0.423474	0.063008	1.78028	0.382453	0.378907	1.40765	0.739294	0.279563
254	759	295.38	309.964	1376.06	244.147	352.188	37.0038						2.34287	0.872703	0.27531	4.56187	0.57481	0.29344	1.48683	0.690159					1161.72	1378.59	447.836	527.665	323.18	917.062					0.422709	0.0753883	1.81187	0.398663	0.43349	1.40618	0.75805	0.279499
255	762	303.647	344.624	1328.58	222.731	345.218	34.4981						2.43642	1.08211	0.231303	4.074	0.543643	0.205855	1.42889	0.628376					1135.71	1354.39	471.821	515.332	303.599	899.502					0.39086	0.0565159	1.96247	0.365973	0.346634	1.3601	0.747093	0.303444
256	765	311.445	334.284	1390.72	249.706	344.685	36.3295						2.52467	1.01964	0.288897	4.68851	0.541259	0.26987	1.55547	0.714796					1167.28	1371.31	501.026	530.987	314.121	931.729					0.429522	0.069713	2.14585	0.407469	0.393305	1.44466	0.815086	0.327393
257	768	303.46	360.885	1442.8	241.996	331.122	40.5479						2.43431	1.18035	0.337166	4.51288	0.480612	0.417321	1.56044	0.673155					1148.3	1357.06	551.573	523.639	312.365	899.403					0.406278	0.0585983	2.46322	0.387991	0.385519	1.35984	0.843574	0.370341
258	771	321.73	358.432	1329.95	199.885	322.794	63.1801						2.64107	1.16554	0.232577	3.55355	0.443374	1.20841	1.54075	0.530059					1160.09	1350.46	548.181	542.879	324.989	923.316					0.420718	0.0534486	2.44192	0.43899	0.441513	1.42259	0.869863	0.365799
259	774	312.11	340.597	1339.39	262.667	359.576	39.9923						2.5322	1.05778	0.241321	4.98376	0.607843	0.3979	1.6368	0.750115					1160.73	1346.92	550.992	541.289	311.203	930.045					0.421506	0.0506859	2.45957	0.434775	0.380364	1.44024	0.864524	0.37208
260	777	308.982	381.577	1377.82	208.502	316.296	36.4138						2.49679	1.30537	0.276942	3.74984	0.414315	0.272817	1.41935	0.584089					1144.89	1344.86	538.434	525.501	322.657	939.659					0.402101	0.0490777	2.38072	0.392926	0.43117	1.46547	0.853577	0.362779
261	780	335.583	384.914	1345.69	208.939	354.75	45.1494						2.79784	1.32553	0.247164	3.75981	0.586262	0.578163	1.54913	0.579119					1142.21	1328.72	528.138	543.925	318.572	918.237					0.398825	0.0364908	2.31608	0.441762	0.413049	1.40926	0.835911	0.350424
262	783	336.209	363.073	1324.31	202.097	328.865	40.6513						2.80493	1.19357	0.227351	3.60393	0.470519	0.420935	1.45354	0.578912
263	786	311.914	387.33	1343.18	200.197	343.914	31.1571						2.52998	1.34013	0.244839	3.56066	0.537812	0.0890727	1.38375	0.5699
264	789	320.193	362.04	1335.02	177.796	326.332	30.2452						2.62368	1.18733	0.237275	3.05033	0.459192	0.057198	1.26917	0.52293
265	792	312.767	355.739	1354.62	206.194	354.03	31.9732						2.53963	1.14926	0.255436	3.69726	0.583044	0.117599	1.39037	0.584821
266	795	288.414	359.522	1308.88	231.287	368.704	45.6015						2.26403	1.17212	0.213046	4.2689	0.648661	0.593966	1.52679	0.620636
267	798	316.457	356.644	1332.69	197.272	340.465	40.5671						2.5814	1.15473	0.235111	3.49403	0.522387	0.417992	1.40094	0.545659
268	801	298.202	368.498	1343.01	206.609	327.356	42.4713						2.37481	1.22635	0.244677	3.70673	0.463769	0.484552	1.41681	0.558243
269	804	350.252	378.462	1321.62	175.383	333.25	36.6015						2.96385	1.28655	0.224852	2.99538	0.490129	0.279378	1.37336	0.531166
270	807	312.85	364.413	1293.25	166.398	361.42	39.0958						2.54057	1.20167	0.19856	2.79068	0.616087	0.366564	1.28569	0.459049
271	810	307.997	353.106	1340.68	186.133	345.934	40.4483						2.48565	1.13335	0.242518	3.24025	0.546841	0.41384	1.34374	0.505221
272	813	295.868	382.205	1272.8	150.204	275.522	32.0843						2.34839	1.30916	0.179609	2.42178	0.231998	0.121482	1.10207	0.443747
273	816	339.61	351.931	1278.53	144.269	337.246	35.6973						2.84343	1.12625	0.18492	2.28656	0.507996	0.247772	1.19949	0.458363
274	819	335.859	352.218	1299.81	145.269	339.45	16.1916						2.80097	1.12799	0.20464	2.30934	0.517848	-0.434035	1.08779	0.511518
275	822	329.117	364.617	1267.04	135.978	375.278	28.6973						2.72467	1.2029	0.174274	2.0977	0.678056	0.00309229	1.14678	0.442366
276	825	311.482	389.389	1238.52	131.523	355.88	39.9195						2.52509	1.35257	0.147837	1.99621	0.591317	0.395356	1.16806	0.388671
277	828	318.61	375.584	1269.55	148.588	354.726	34.5632						2.60577	1.26916	0.176595	2.38495	0.586156	0.20813	1.20513	0.439427
278	831	354.485	388.323	1220.05	130.05	335.724	40.1188						3.01176	1.34613	0.130719	1.96265	0.501188	0.402322	1.22579	0.452749
279	834	310.528	373.871	1301.6	121.828	327.291	41.3602						2.51429	1.25881	0.206297	1.77534	0.463482	0.445714	1.11066	0.370261
280	837	332.132	368.459	1241.22	138.133	354.816	46.7625						2.75879	1.22611	0.150339	2.14677	0.586558	0.634548	1.25052	0.412691
281	840	334.948	377.36	1255.3	146.15	353.469	30.5862						2.79066	1.27989	0.163394	2.32943	0.580536	0.0691173	1.20217	0.467238
282	843	337.561	360.851	1249.03	131.337	370.912	53.3602						2.82024	1.18015	0.157576	1.99196	0.658533	0.865165	1.27894	0.39612
283	846	353.632	355.502	1290.84	120.147	355.861	29.8429						3.00211	1.14783	0.196327	1.73705	0.591231	0.0431359	1.11961	0.455202
284	849	323.546	387.858	1250.5	137.097	363.615	35.9962						2.66162	1.34332	0.158946	2.12318	0.625902	0.25822	1.1952	0.420687
285	852	358.236	350.561	1197.64	121.305	368.792	39.0307						3.05422	1.11798	0.109951	1.76342	0.649054	0.364288	1.17649	0.445314
286	855	355.831	394.403	1268.92	118.634	334.544	38.1264						3.027	1.38286	0.176011	1.70259	0.495912	0.332679	1.18617	0.444198
287	858	334.344	380.353	1222.39	124.857	350.364	28.9923						2.78382	1.29797	0.132887	1.84434	0.566652	0.0134038	1.10651	0.440783
288	861	373.534	400.759	1192.42	148.022	369.077	27.1264						3.22734	1.42126	0.105112	2.37205	0.650327	-0.0518173	1.28738	0.534008
289	864	354.524	381.442	1191.88	121.398	373.7	48.7854						3.01221	1.30455	0.104616	1.76554	0.671	0.705257	1.26053	0.421006
290	867	328.656	426.089	1220.32	94.9928	348.231	29.364						2.71946	1.5743	0.130969	1.16401	0.557115	0.0263963	1.02871	0.416636
291	870	317.135	403.64	1189.7	128.946	325.501	30.1877						2.58907	1.43867	0.102594	1.9375	0.455477	0.0551881	1.09642	0.429543
292	873	377.613	402.762	1210.79	93.957	349.715	31.3142						3.27351	1.43336	0.122137	1.14042	0.563751	0.094564	1.10462	0.486192
293	876	353.227	441.868	1291.92	85	352.39	25.0728						2.99753	1.66963	0.197331	0.93637	0.57571	-0.123599	1.04216	0.466143
294	879	349.39	396.637	1194.45	87.5376	369.612	36.2261						2.9541	1.39636	0.106998	0.994179	0.652721	0.266256	1.06177	0.424624
295	882	348.957	440.191	1242.28	91.0394	357.6	37.0651						2.9492	1.6595	0.151322	1.07395	0.599006	0.295582	1.12143	0.429286
296	885	334.887	404.861	1198.25	109.559	317.437	33.5364						2.78996	1.44605	0.110515	1.49585	0.419418	0.172239	1.07234	0.425474
297	888	344.991	415.703	1183.87	89.7061	357.195	23.4598						2.90432	1.51155	0.0971859	1.04358	0.597196	-0.179981	0.995641	0.456785
298	891	334.356	453.413	1192.93	99.2151	351.338	36.4789						2.78396	1.73938	0.105583	1.2602	0.571008	0.275092	1.12254	0.416985
299	894	350.899	415.099	1168.5	118.262	347.758	27.0038						2.97118	1.5079	0.0829457	1.6941	0.554999	-0.0561027	1.12584	0.472039
300	897	337.613	441.571	1204.57	81.4767	321.827	34.5172						2.82083	1.66783	0.116374	0.856106	0.439046	0.206522	1.01778	0.42838

## Sheet: H
	hugin L-glucose.oir	hugin L-glucose_0001.oir	hugin L-glucose_0002.oir	hugin L-glucose_0003.oir	hugin L-glucose_0004.oir	hugin L-glucose_0005.oir					hugin L-glucose.oir	hugin L-glucose_0001.oir	hugin L-glucose_0002.oir	hugin L-glucose_0003.oir	hugin L-glucose_0004.oir	hugin L-glucose_0005.oir						hugin D-glucose_0004.oir	huginD-glucose_0005.oir	huginD-glucose_0006.oir	hugin D-glucose_0007.oir	hugin D-glucose_0009.oir	hugin D-glucose_0010.oir					hugin D-glucose_0004.oir	huginD-glucose_0005.oir	huginD-glucose_0006.oir	hugin D-glucose_0007.oir	hugin D-glucose_0009.oir	hugin D-glucose_0010.oir						Peak
time（sec）	raw data	raw data	raw data	raw data	raw data	raw data					F/F0	F/F0	F/F0	F/F0	F/F0	F/F0	mean	SEM				raw data	raw data	raw data	raw data	raw data	raw data					F/F0	F/F0	F/F0	F/F0	F/F0	F/F0	Mean	SEM				D-Glucose	L-Glucose
0	108.428	161.713	241.59	189.47	60.9294	253.087					0.0297932	0.00977922	0.0379797	-0.00352906	-0.0364716	0.120088	0.0262732	0.0216393				228.054	114.575	227.999	83.9798	282.727	57.5795					0.0213582	0.0350047	-0.000896217	0.0800705	-0.0545905	-0.0185598	0.0103978	0.0189469				1.74421	0.0679209
3	99.9368	155.56	244.812	190.801	61.5176	237.446					-0.0508492	-0.0286454	0.051822	0.00346732	-0.0271699	0.0508649	-8.50483e-05	0.0177286				221.952	105.312	226.975	75.3256	288.409	60.3976					-0.00596881	-0.0486789	-0.00538344	-0.0312318	-0.0355915	0.0294746	-0.01623	0.0114959				1.37587	0.0652132
6	103.062	158.168	238.152	195.131	60.3162	234.708					-0.0211638	-0.0123573	0.0232055	0.0262441	-0.0461686	0.0387491	0.00141816	0.0134769				218.405	112.058	230.39	79.3377	294.365	53.2934					-0.0218562	0.0122631	0.00957863	0.0203681	-0.0156739	-0.0916162	-0.0144894	0.0168466				0.379545	-0.0170874
9	107.505	157.272	235.252	193.284	61.6434	231.038					0.0210336	-0.0179528	0.010748	0.0165265	-0.0251805	0.0225076	0.00461376	0.00849763				216.574	107.948	229.452	75.5136	294.317	63.181					-0.030056	-0.0248669	0.00546827	-0.0288139	-0.0158358	0.0769175	-0.00286446	0.0168322				2.60269	0.357741
12	108.104	153.704	238.506	193.164	65.7493	236.181					0.0267217	-0.040231	0.024726	0.0158986	0.0397496	0.0452673	0.0186887	0.0125569				215.973	108.39	226.381	81.1284	300.373	61.6252					-0.0327481	-0.0208732	-0.00798681	0.0433985	0.00441551	0.050399	0.00610081	0.0138943				1.2188	0.773058
15	105.536	167.575	232.663	185.99	60.3816	237.805					0.00232542	0.0463831	-0.000378087	-0.0218318	-0.0451344	0.0524555	0.00563663	0.0155259				219.807	99.8511	234.849	79.7553	286.941	59.8766					-0.0155758	-0.0980057	0.0291199	0.0257389	-0.0405004	0.0205941	-0.0131048	0.0203242				1.16811	0.193301
18	109.383	158.284	234.641	191.453	62.5691	240.032					0.0388623	-0.0116336	0.00812157	0.00689897	-0.0105416	0.0623107	0.0156697	0.0119439				209.758	100.519	233.743	77.1618	287.084	55.9872					-0.060582	-0.0919696	0.0242725	-0.00761626	-0.0400205	-0.0457005	-0.0369361	0.0166135			Mean	1.41487	0.240024
21	104.628	157.864	231.448	190.484	62.1985	223.041					-0.00629167	-0.0142537	-0.00559526	0.00180434	-0.0164022	-0.0128848	-0.00893721	0.00278761				208.882	104.536	216.704	78.2983	306.668	60.4534					-0.0645026	-0.055687	-0.0503919	0.00700035	0.0254647	0.0304257	-0.0179485	0.0177869			peak	0.299562	0.119227
24	100.549	162.737	234.43	189.986	61.7287	224.729					-0.0450358	0.0161715	0.00721545	-0.000817392	-0.0238316	-0.00541594	-0.00861896	0.0091178				213.763	106.052	221.256	86.7472	282.708	52.4214					-0.0426422	-0.0419869	-0.030447	0.115662	-0.0546531	-0.106479	-0.0267577	0.0305041
27	103.799	163.376	237.127	182.728	61.1809	222.262					-0.014168	0.0201615	0.018803	-0.0389869	-0.0324944	-0.0163311	-0.0105026	0.0102331				212.317	109.106	230.793	81.5561	303.31	57.6718					-0.0491218	-0.0144053	0.0113472	0.0488992	0.0142385	-0.0169866	-0.00100479	0.0136938
30	102.988	159.236	232.967	189.955	63.5096	224.583					-0.0218676	-0.0056903	0.000929321	-0.000979377	0.00433133	-0.00606209	-0.00488978	0.0037614				226.894	115.488	221.201	91.001	298.223	53.6335					0.016163	0.0432494	-0.030688	0.170371	-0.00277319	-0.0858192	0.0184171	0.0353257
33	102.632	163.963	226.225	187.315	63.1985	224.883					-0.0252563	0.0238257	-0.0280377	-0.0148669	-0.000588354	-0.00473217	-0.00827597	0.00779845				225.914	108.019	235.006	73.5753	303.791	58.9735					0.0117767	-0.0242192	0.0298088	-0.0537425	0.0158453	0.00520084	-0.00255501	0.0125712
36	101.558	156.93	226.539	195.455	73.2875	234.368					-0.0354538	-0.0200908	-0.0266891	0.0279449	0.158958	0.0372439	0.0236521	0.029694				227.129	109.206	230.83	73.8241	298.914	57.6463					0.0172177	-0.0135001	0.0115102	-0.0505427	-0.000462227	-0.0174212	-0.00886638	0.00999631			P value	0.0045
39	108.1	162.135	227.42	188.549	63.3824	211.936					0.0266837	0.0124124	-0.0229026	-0.0083744	0.00231981	-0.0620323	-0.0086489	0.0127349				228.088	117.097	231.589	76.3519	299.473	57.5356					0.0215118	0.0577869	0.0148367	-0.0180324	0.00140534	-0.0193081	0.00970002	0.0117723			95% confidence interval	-1.893 to -0.4565
42	106.008	158.416	225.439	193.605	62.3228	217.319					0.00680919	-0.0108118	-0.0314135	0.0182142	-0.0144365	-0.03821	-0.0116414	0.0088263				229.321	117.582	225.94	75.3104	294.247	61.1545					0.0270343	0.0621627	-0.00991798	-0.0314273	-0.0160705	0.0423759	0.0123595	0.0150759			F, DFn, Dfd	6.313, 5, 5
45	110.161	160.871	234.867	189.026	62.3074	221.197					0.0462562	0.00452281	0.00909471	-0.00586311	-0.0146801	-0.021044	0.00304775	0.00979762				217.341	111.011	228.201	72.3145	316.371	59.2249					-0.0266214	0.00280604	-1.3672e-05	-0.0699578	0.0579125	0.00948595	-0.00439805	0.0172612
[truncated: 274 more rows]
