# Supplementary material for: Hugin-AstA circuitry is a novel central energy sensor that directly regulates sweet sensation in Drosophila and mouse
Source: eLife. 2026 May 5;14:RP108551. doi: 10.7554/eLife.108551 (PMC13143273; doi:10.7554/eLife.108551)
Supplement: Figure 3—figure supplement 1—source data 1. [file elife-108551-fig3-figsupp1-data1.xlsx]

## Sheet: A
	6.25	12.5	25	50	100	200	400	800							6.25	12.5	25	50	100	200	400	800
w1118 fed	0/10	0/10	0/10	0/10	0/10	2/10	6/10	8/10						w1118 fed	0	0	0	0	0	0.2	0.6	0.8
	0/10	0/10	0/10	0/10	2/10	3/10	5/10	8/10							0	0	0	0	0.2	0.3	0.5	0.8
	0/10	0/10	0/10	0/10	1/10	4/10	6/10	9/10							0	0	0	0	0.1	0.4	0.6	0.9
	0/10	0/10	0/10	0/10	1/10	2/10	4/10	9/10							0	0	0	0	0.1	0.2	0.4	0.9
PK2-R1-KO fed	0/10	0/10	0/10	0/10	1/10	3/10	7/10	9/10						PK2-R1-KO fed	0	0	0	0	0.1	0.3	0.7	0.9
	0/10	0/10	0/10	0/10	1/10	2/10	7/10	10/10							0	0	0	0	0.1	0.2	0.7	1
	0/10	0/10	0/10	1/10	2/10	5/10	8/10	10/10							0	0	0	0.1	0.2	0.5	0.8	1
	0/10	0/10	0/10	1/10	1/10	4/10	6/10	10/10							0	0	0	0.1	0.1	0.4	0.6	1
																	Bonferroni's multiple comparisons test	95% confidence interval	P value	F (DFn, DFd)
										Bonferroni's multiple comparisons test	95% confidence interval	P value	F (DFn, DFd)				W1118 FED - PK2-R1 KO FED			F (7, 48) = 2.262
										W1118 FED vs. PK2-R1 KO FED	-0.09162 to -0.02088	0.001	F (14, 72) = 1.481				Row 1	-0.1239 to 0.1239	>0.9999
																	Row 2	-0.1239 to 0.1239	>0.9999
																	Row 3	-0.1239 to 0.1239	>0.9999
																	Row 4	-0.1739 to 0.07385	>0.9999
																	Row 5	-0.1489 to 0.09885	>0.9999
																	Row 6	-0.1989 to 0.04885	0.7175
																	Row 7	-0.2989 to -0.05115	0.0015
																	Row 8	-0.2489 to -0.001149	0.0466

## Sheet: B
	6.25	12.5	25	50	100	200	400	800							6.25	12.5	25	50	100	200	400	800
w1118 ST	0/10	0/10	0/10	2/10	4/10	6/10	8/10	10/10						w1118 ST	0	0	0	0.2	0.4	0.6	0.8	1
	0/10	1/10	1/10	4/10	6/10	8/10	9/10	10/10							0	0.1	0.1	0.4	0.6	0.8	0.9	1
	0/10	0/10	1/10	3/10	6/10	8/10	10/10	10/10							0	0	0.1	0.3	0.6	0.8	1	1
	0/10	0/10	0/10	5/10	7/10	9/10	10/10	10/10							0	0	0	0.5	0.7	0.9	1	1
PK2-R1-KO ST	0/10	1/10	2/10	5/10	7/10	8/10	10/10	10/10						PK2-R1-KO ST	0	0.1	0.2	0.5	0.7	0.8	1	1
	0/10	2/10	3/10	6/10	7/10	9/10	10/10	10/10							0	0.2	0.3	0.6	0.7	0.9	1	1
	0/10	1/10	2/10	5/10	9/10	10/10	10/10	10/10							0	0.1	0.2	0.5	0.9	1	1	1
	0/10	1/10	3/10	5/10	7/10	8/10	10/10	10/10							0	0.1	0.3	0.5	0.7	0.8	1	1
								Bonferroni's multiple comparisons test	95% confidence interval	P value	F (DFn, DFd)			Bonferroni's multiple comparisons test	95% confidence interval	P value	F (DFn, DFd)
								W1118 ST vs. PK2-R1 KO ST	-0.1433 to -0.06294	<0.0001	F (14, 72) = 1.615			W1118 ST - PK2-R1 KO ST			F (7, 48) = 2.104
														Row 1	-0.1524 to 0.1524	>0.9999
														Row 2	-0.2524 to 0.05239	0.5329
														Row 3	-0.3524 to -0.04761	0.0038
														Row 4	-0.3274 to -0.02261	0.0153
														Row 5	-0.3274 to -0.02261	0.0153
														Row 6	-0.2524 to 0.05239	0.5329
														Row 7	-0.2274 to 0.07739	>0.9999
														Row 8	-0.1524 to 0.1524	>0.9999

## Sheet: C
	6.25	12.5	25	50	100	200	400	800							6.25	12.5	25	50	100	200	400	800
w1118 refed	0/10	0/10	0/10	0/10	1/10	1/10	8/10	10/10						w1118 refed	0	0	0	0	0.1	0.1	0.8	1
	0/10	0/10	0/10	0/10	1/10	4/10	5/10	8/10							0	0	0	0	0.1	0.4	0.5	0.8
	0/10	0/10	0/10	0/10	1/10	4/10	8/10	9/10							0	0	0	0	0.1	0.4	0.8	0.9
	0/10	0/10	0/10	1/10	0/10	3/10	6/10	10/10							0	0	0	0.1	0	0.3	0.6	1
PK2-R1-KO refed	0/10	0/10	0/10	1/10	3/10	4/10	8/10	9/10						PK2-R1-KO refed	0	0	0	0.1	0.3	0.4	0.8	0.9
	0/10	0/10	0/10	1/10	2/10	4/10	7/10	10/10							0	0	0	0.1	0.2	0.4	0.7	1
	0/10	0/10	0/10	0/10	3/10	5/10	8/10	10/10							0	0	0	0	0.3	0.5	0.8	1
	0/10	0/10	1/10	1/10	4/10	8/10	9/10	10/10							0	0	0.1	0.1	0.4	0.8	0.9	1
							Bonferroni's multiple comparisons test	95% confidence interval	P value	F (DFn, DFd)					Bonferroni's multiple comparisons test	95% confidence interval	P value	F (DFn, DFd)
							W1118 REFED vs. PK2-R1 KO REFED	-0.1357 to -0.03933	0.0002	F (14, 72) = 1.647					W1118 REFED - PK2-R1 KO REFED			F (7, 48) = 2.471
															Row 1	-0.1702 to 0.1702	>0.9999
															Row 2	-0.1702 to 0.1702	>0.9999
															Row 3	-0.1952 to 0.1452	>0.9999
															Row 4	-0.2202 to 0.1202	>0.9999
															Row 5	-0.3952 to -0.05478	0.0035
															Row 6	-0.3952 to -0.05478	0.0035
															Row 7	-0.2952 to 0.04522	0.3278
															Row 8	-0.2202 to 0.1202	>0.9999
