# Supplementary material for: Hugin-AstA circuitry is a novel central energy sensor that directly regulates sweet sensation in Drosophila and mouse
Source: eLife. 2026 May 5;14:RP108551. doi: 10.7554/eLife.108551 (PMC13143273; doi:10.7554/eLife.108551)
Supplement: Figure 3—source data 1. [file elife-108551-fig3-data1.xlsx]

## Sheet: A
		6.25	12.5	25	50	100	200	400	800
fed 20℃	hug/TRPA1	0/10	0/10	0/10	0/10	0/10	1/10	3/10	6/10
		0/10	0/10	0/10	0/10	0/10	0/10	2/10	7/10
		0/10	0/10	0/10	0/10	0/10	0/10	2/10	6/10
		0/10	0/10	0/10	0/10	0/10	0/10	3/10	6/10
fed 20℃	/TRPA1	0/10	0/10	0/10	0/10	0/10	0/10	1/10	5/10
		0/10	0/10	0/10	0/10	0/10	0/10	3/10	7/10
		0/10	0/10	0/10	0/10	0/10	1/10	2/10	6/10
		0/10	0/10	0/10	0/10	0/10	0/10	2/10	6/10
fed 20℃	hug/	0/10	0/10	0/10	0/10	1/10	1/10	5/10	9/10
		0/10	0/10	0/10	0/10	0/10	2/10	6/10	8/10
		0/10	0/10	0/10	0/10	0/10	1/10	4/10	8/10
		0/10	0/10	0/10	0/10	0/10	2/10	3/10	7/10
		6.25	12.5	25	50	100	200	400	800			Bonferroni's multiple comparisons test	95% confidence interval	P value	F (DFn, DFd)			Bonferroni's multiple comparisons test	95% confidence interval	P value	F (DFn, DFd)
fed 20℃	hug/TRPA1	0	0	0	0	0	0.1	0.3	0.6			hug/TRPA1 fed 20 vs. /TRPA1 fed 20	-0.01760 to 0.03635	0.8579	F (14, 72) = 5.511			Row 1			F (14, 72) = 5.511
		0	0	0	0	0	0	0.2	0.7			hug/TRPA1 fed 20 vs. hug/ fed 20	-0.09260 to -0.03865	<0.0001				hug/TRPA1 fed 20 vs. /TRPA1 fed 20	-0.07631 to 0.07631	>0.9999
		0	0	0	0	0	0	0.2	0.6									hug/TRPA1 fed 20 vs. hug/ fed 20	-0.07631 to 0.07631	>0.9999
		0	0	0	0	0	0	0.3	0.6									Row 2
																		hug/TRPA1 fed 20 vs. /TRPA1 fed 20	-0.07631 to 0.07631	>0.9999
	mean	0	0	0	0	0	0.025	0.25	0.625									hug/TRPA1 fed 20 vs. hug/ fed 20	-0.07631 to 0.07631	>0.9999
	SEM	0	0	0	0	0	0.025	0.0288675	0.025									Row 3
																		hug/TRPA1 fed 20 vs. /TRPA1 fed 20	-0.07631 to 0.07631	>0.9999
fed 20℃	/TRPA1	0	0	0	0	0	0	0.1	0.5									hug/TRPA1 fed 20 vs. hug/ fed 20	-0.07631 to 0.07631	>0.9999
		0	0	0	0	0	0	0.3	0.7									Row 4
		0	0	0	0	0	0.1	0.2	0.6									hug/TRPA1 fed 20 vs. /TRPA1 fed 20	-0.07631 to 0.07631	>0.9999
		0	0	0	0	0	0	0.2	0.6									hug/TRPA1 fed 20 vs. hug/ fed 20	-0.07631 to 0.07631	>0.9999
																		Row 5
	mean	0	0	0	0	0	0.025	0.2	0.6									hug/TRPA1 fed 20 vs. /TRPA1 fed 20	-0.07631 to 0.07631	>0.9999
	SEM	0	0	0	0	0	0.025	0.0408248	0.0408248									hug/TRPA1 fed 20 vs. hug/ fed 20	-0.1013 to 0.05131	0.9114
																		Row 6
																		hug/TRPA1 fed 20 vs. /TRPA1 fed 20	-0.07631 to 0.07631	>0.9999
fed 20℃	hug/	0	0	0	0	0.1	0.1	0.5	0.9									hug/TRPA1 fed 20 vs. hug/ fed 20	-0.2013 to -0.04869	0.0007
		0	0	0	0	0	0.2	0.6	0.8									Row 7
		0	0	0	0	0	0.1	0.4	0.8									hug/TRPA1 fed 20 vs. /TRPA1 fed 20	-0.02631 to 0.1263	0.276
		0	0	0	0	0	0.2	0.3	0.7									hug/TRPA1 fed 20 vs. hug/ fed 20	-0.2763 to -0.1237	<0.0001
																		Row 8
	mean	0	0	0	0	0.025	0.15	0.45	0.8									hug/TRPA1 fed 20 vs. /TRPA1 fed 20	-0.05131 to 0.1013	0.9114
	SEM	0	0	0	0	0.025	0.0288675	0.0645497	0.0408248									hug/TRPA1 fed 20 vs. hug/ fed 20	-0.2513 to -0.09869	<0.0001
		6.25	12.5	25	50	100	200	400	800
fed 30℃	hug/TRPA1	0/10	0/10	0/10	0/10	0/10	0/10	0/10	2/10
		0/10	0/10	0/10	0/10	0/10	0/10	1/10	2/10
		0/10	0/10	0/10	0/10	0/10	1/10	1/10	4/10
		0/10	0/10	0/10	0/10	0/10	1/10	1/10	4/10
fed 30℃	w1118/TRPA1	0/10	0/10	0/10	0/10	0/10	0/10	2/10	4/10
		0/10	0/10	0/10	0/10	0/10	0/10	2/10	5/10
		0/10	0/10	0/10	0/10	0/10	1/10	2/10	6/10
		0/10	0/10	0/10	0/10	0/10	1/10	2/10	7/10
fed 30℃	hug/w1118	0/10	0/10	0/10	0/10	0/10	1/10	3/10	8/10
		0/10	0/10	0/10	0/10	0/10	1/10	3/10	7/10
		0/10	0/10	0/10	0/10	0/10	2/10	3/10	7/10
		0/10	0/10	0/10	0/10	0/10	2/10	5/10	7/10
		6.25	12.5	25	50	100	200	400	800
fed 30℃	hug/TRPA1	0	0	0	0	0	0	0	0.2			Bonferroni's multiple comparisons test	95% confidence interval	P value	F (DFn, DFd)			Bonferroni's multiple comparisons test	95% confidence interval	P value	F (DFn, DFd)
		0	0	0	0	0	0	0.1	0.2			hug/TRPA1 fed 30 vs. /TRPA1 fed 30	-0.07427 to -0.01948	0.0004	F (14, 72) = 11.94			Row 1			F (14, 72) = 11.94
		0	0	0	0	0	0.1	0.1	0.4			hug/TRPA1 fed 30 vs. hug/ fed 30	-0.1274 to -0.07260	<0.0001				hug/TRPA1 fed 30 vs. /TRPA1 fed 30	-0.07749 to 0.07749	>0.9999
		0	0	0	0	0	0.1	0.1	0.4									hug/TRPA1 fed 30 vs. hug/ fed 30	-0.07749 to 0.07749	>0.9999
																		Row 2
	mean	0	0	0	0	0	0.05	0.075	0.3									hug/TRPA1 fed 30 vs. /TRPA1 fed 30	-0.07749 to 0.07749	>0.9999
	SEM	0	0	0	0	0	0.0288675	0.025	0.057735									hug/TRPA1 fed 30 vs. hug/ fed 30	-0.07749 to 0.07749	>0.9999
																		Row 3
fed 30℃	/TRPA1	0	0	0	0	0	0	0.2	0.4									hug/TRPA1 fed 30 vs. /TRPA1 fed 30	-0.07749 to 0.07749	>0.9999
		0	0	0	0	0	0	0.2	0.5									hug/TRPA1 fed 30 vs. hug/ fed 30	-0.07749 to 0.07749	>0.9999
		0	0	0	0	0	0.1	0.2	0.6									Row 4
		0	0	0	0	0	0.1	0.2	0.7									hug/TRPA1 fed 30 vs. /TRPA1 fed 30	-0.07749 to 0.07749	>0.9999
																		hug/TRPA1 fed 30 vs. hug/ fed 30	-0.07749 to 0.07749	>0.9999
	mean	0	0	0	0	0	0.05	0.2	0.55									Row 5
	SEM	0	0	0	0	0	0.0288675	0	0.0645497									hug/TRPA1 fed 30 vs. /TRPA1 fed 30	-0.07749 to 0.07749	>0.9999
																		hug/TRPA1 fed 30 vs. hug/ fed 30	-0.07749 to 0.07749	>0.9999
fed 30℃	hug/	0	0	0	0	0	0.1	0.3	0.8									Row 6
		0	0	0	0	0	0.1	0.3	0.7									hug/TRPA1 fed 30 vs. /TRPA1 fed 30	-0.07749 to 0.07749	>0.9999
		0	0	0	0	0	0.2	0.3	0.7									hug/TRPA1 fed 30 vs. hug/ fed 30	-0.1775 to -0.02251	0.0085
		0	0	0	0	0	0.2	0.5	0.7									Row 7
																		hug/TRPA1 fed 30 vs. /TRPA1 fed 30	-0.2025 to -0.04751	0.0009
	mean	0	0	0	0	0	0.15	0.35	0.725									hug/TRPA1 fed 30 vs. hug/ fed 30	-0.3525 to -0.1975	<0.0001
	SEM	0	0	0	0	0	0.0288675	0.05	0.025									Row 8
																		hug/TRPA1 fed 30 vs. /TRPA1 fed 30	-0.3275 to -0.1725	<0.0001
																		hug/TRPA1 fed 30 vs. hug/ fed 30	-0.5025 to -0.3475	<0.0001

## Sheet: B
		6.25	12.5	25	50	100	200	400	800
ST-12h 20℃	hug/TRPA1	0/10	0/10	0/10	0/10	2/10	3/10	7/10	10/10
		0/10	0/10	0/10	0/10	1/10	3/10	7/10	10/10
		0/10	0/10	0/10	0/10	0/10	1/10	5/10	10/10
		0/10	0/10	0/10	0/10	1/10	1/10	5/10	10/10
ST-12h 20℃	w1118/TRPA1	0/10	0/10	0/10	0/10	1/10	4/10	7/10	10/10
		0/10	0/10	0/10	0/10	1/10	2/10	9/10	9/10
		0/10	0/10	0/10	0/10	1/10	2/10	4/10	10/10
		0/10	0/10	0/10	0/10	1/10	1/10	6/10	10/10
ST-12h 20℃	hug/w1118	0/10	0/10	0/10	1/10	2/10	5/10	9/10	10/10
		0/10	0/10	0/10	0/10	3/10	6/10	7/10	10/10
		0/10	0/10	0/10	0/10	3/10	5/10	9/10	10/10
		0/10	0/10	0/10	0/10	1/10	3/10	8/10	10/10
		6.25	12.5	25	50	100	200	400	800			Bonferroni's multiple comparisons test	95% confidence interval	P value	F (DFn, DFd)			Bonferroni's multiple comparisons test	95% confidence interval	P value	F (DFn, DFd)
ST-12h 20℃	hug/TRPA1	0	0	0	0	0.2	0.3	0.7	1			hug/TRPA1 st 20 vs. /TRPA1 st 20	-0.04864 to 0.03614	>0.9999	F (14, 72) = 2.745			Row 1			F (14, 72) = 2.745
		0	0	0	0	0.1	0.3	0.7	1			hug/TRPA1 st 20 vs. hug/ st 20	-0.1236 to -0.03886	<0.0001				hug/TRPA1 st 20 vs. /TRPA1 st 20	-0.1199 to 0.1199	>0.9999
		0	0	0	0	0	0.1	0.5	1									hug/TRPA1 st 20 vs. hug/ st 20	-0.1199 to 0.1199	>0.9999
		0	0	0	0	0.1	0.1	0.5	1									Row 2
																		hug/TRPA1 st 20 vs. /TRPA1 st 20	-0.1199 to 0.1199	>0.9999
	mean	0	0	0	0	0.1	0.2	0.6	1									hug/TRPA1 st 20 vs. hug/ st 20	-0.1199 to 0.1199	>0.9999
	SEM	0	0	0	0	0.0408248	0.057735	0.057735	0									Row 3
																		hug/TRPA1 st 20 vs. /TRPA1 st 20	-0.1199 to 0.1199	>0.9999
ST-12h 20℃	/TRPA1	0	0	0	0	0.1	0.4	0.7	1									hug/TRPA1 st 20 vs. hug/ st 20	-0.1199 to 0.1199	>0.9999
		0	0	0	0	0.1	0.2	0.9	0.9									Row 4
		0	0	0	0	0.1	0.2	0.4	1									hug/TRPA1 st 20 vs. /TRPA1 st 20	-0.1199 to 0.1199	>0.9999
		0	0	0	0	0.1	0.1	0.6	1									hug/TRPA1 st 20 vs. hug/ st 20	-0.1449 to 0.09490	>0.9999
																		Row 5
	mean	0	0	0	0	0.1	0.225	0.65	0.975									hug/TRPA1 st 20 vs. /TRPA1 st 20	-0.1199 to 0.1199	>0.9999
	SEM	0	0	0	0	0	0.0629153	0.104083	0.025									hug/TRPA1 st 20 vs. hug/ st 20	-0.2449 to -0.005103	0.0393
																		Row 6
																		hug/TRPA1 st 20 vs. /TRPA1 st 20	-0.1449 to 0.09490	>0.9999
ST-12h 20℃	hug/	0	0	0	0.1	0.2	0.5	0.9	1									hug/TRPA1 st 20 vs. hug/ st 20	-0.3949 to -0.1551	<0.0001
		0	0	0	0	0.3	0.6	0.7	1									Row 7
		0	0	0	0	0.3	0.5	0.9	1									hug/TRPA1 st 20 vs. /TRPA1 st 20	-0.1699 to 0.06990	0.6859
		0	0	0	0	0.1	0.3	0.8	1									hug/TRPA1 st 20 vs. hug/ st 20	-0.3449 to -0.1051	0.0001
																		Row 8
	mean	0	0	0	0.025	0.225	0.475	0.825	1									hug/TRPA1 st 20 vs. /TRPA1 st 20	-0.09490 to 0.1449	>0.9999
	SEM	0	0	0	0.025	0.0478714	0.0629153	0.0478714	0									hug/TRPA1 st 20 vs. hug/ st 20	-0.1199 to 0.1199	>0.9999
		6.25	12.5	25	50	100	200	400	800
ST-12h 30℃	hug/TRPA1	0/10	0/10	0/10	0/10	0/10	0/10	1/10	5/10
		0/10	0/10	0/10	0/10	0/10	1/10	4/10	6/10
		0/10	0/10	0/10	0/10	0/10	0/10	2/10	7/10
		0/10	0/10	0/10	0/10	0/10	2/10	3/10	5/10
		0/10	0/10	0/10	0/10	0/10	0/10	2/10	6/10
ST-12h 30℃	w1118/TRPA1	0/10	0/10	0/10	0/10	0/10	1/10	4/10	9/10
		0/10	0/10	0/10	0/10	1/10	2/10	4/10	7/10
		0/10	0/10	0/10	0/10	2/10	3/10	7/10	9/10
		0/10	0/10	0/10	0/10	0/10	2/10	6/10	9/10
		0/10	0/10	0/10	0/10	2/10	4/10	7/10	10/10
ST-12h 30℃	hug/w1118	0/10	0/10	0/10	1/10	2/10	4/10	9/10	10/10
		0/10	0/10	0/10	0/10	3/10	4/10	8/10	10/10
		0/10	0/10	0/10	1/10	2/10	5/10	9/10	10/10
		0/10	0/10	0/10	1/10	1/10	3/10	8/10	10/10
		6.25	12.5	25	50	100	200	400	800			Bonferroni's multiple comparisons test	95% confidence interval	P value	F (DFn, DFd)			Bonferroni's multiple comparisons test	95% confidence interval	P value	F (DFn, DFd)
ST-12h 30℃	hug/TRPA1	0	0	0	0	0	0	0.1	0.5			hug/TRPA1 st 30 vs. /TRPA1 st 30	-0.1469 to -0.07806	<0.0001	F (14, 88) = 13.61			Row 1			F (14, 88) = 13.61
		0	0	0	0	0	0.1	0.4	0.6			hug/TRPA1 st 30 vs. hug/ st 30	-0.2422 to -0.1691	<0.0001				hug/TRPA1 st 30 vs. /TRPA1 st 30	-0.09742 to 0.09742	>0.9999
		0	0	0	0	0	0	0.2	0.7									hug/TRPA1 st 30 vs. hug/ st 30	-0.1033 to 0.1033	>0.9999
		0	0	0	0	0	0.2	0.3	0.5									Row 2
		0	0	0	0	0	0	0.2	0.6									hug/TRPA1 st 30 vs. /TRPA1 st 30	-0.09742 to 0.09742	>0.9999
	mean	0	0	0	0	0	0.06	0.24	0.58									hug/TRPA1 st 30 vs. hug/ st 30	-0.1033 to 0.1033	>0.9999
	SEM	0	0	0	0	0	0.04	0.0509902	0.0374166									Row 3
																		hug/TRPA1 st 30 vs. /TRPA1 st 30	-0.09742 to 0.09742	>0.9999
ST-12h 30℃	/TRPA1	0	0	0	0	0	0.1	0.4	0.9									hug/TRPA1 st 30 vs. hug/ st 30	-0.1033 to 0.1033	>0.9999
		0	0	0	0	0.1	0.2	0.4	0.7									Row 4
		0	0	0	0	0.2	0.3	0.7	0.9									hug/TRPA1 st 30 vs. /TRPA1 st 30	-0.09742 to 0.09742	>0.9999
		0	0	0	0	0	0.2	0.6	0.9									hug/TRPA1 st 30 vs. hug/ st 30	-0.1783 to 0.02833	0.2029
		0	0	0	0	0.2	0.4	0.7	1									Row 5
	mean	0	0	0	0	0.1	0.24	0.56	0.88									hug/TRPA1 st 30 vs. /TRPA1 st 30	-0.1974 to -0.002581	0.043
	SEM	0	0	0	0	0.0447214	0.0509902	0.0678233	0.0489898									hug/TRPA1 st 30 vs. hug/ st 30	-0.3033 to -0.09667	<0.0001
																		Row 6
																		hug/TRPA1 st 30 vs. /TRPA1 st 30	-0.2774 to -0.08258	0.0001
ST-12h 30℃	hug/	0	0	0	0.1	0.2	0.4	0.9	1									hug/TRPA1 st 30 vs. hug/ st 30	-0.4433 to -0.2367	<0.0001
		0	0	0	0	0.3	0.4	0.8	1									Row 7
		0	0	0	0.1	0.2	0.5	0.9	1									hug/TRPA1 st 30 vs. /TRPA1 st 30	-0.4174 to -0.2226	<0.0001
		0	0	0	0.1	0.1	0.3	0.8	1									hug/TRPA1 st 30 vs. hug/ st 30	-0.7133 to -0.5067	<0.0001
																		Row 8
	mean	0	0	0	0.075	0.2	0.4	0.85	1									hug/TRPA1 st 30 vs. /TRPA1 st 30	-0.3974 to -0.2026	<0.0001
	SEM	0	0	0	0.025	0.0408248	0.0408248	0.0288675	0									hug/TRPA1 st 30 vs. hug/ st 30	-0.5233 to -0.3167	<0.0001

## Sheet: C
	6.25	12.5	25	50	100	200	400	800			Bonferroni's multiple comparisons test	95% confidence interval	P Value	F (DFn, DFd)		Bonferroni's multiple comparisons test	95% confidence interval	P Value	F (DFn, DFd)
fed-H2O	0	0	0.1	0.2	0.3	0.6	1	1			fed-hugin vs. fed-H2O	-0.1971 to -0.1092	<0.0001	F (14, 72) = 5.292		Row 1			F (14, 72) = 5.292
	0	0	0	0.1	0.4	0.7	0.9	1			fed-hugin vs. fed-control peptide	-0.1815 to -0.09353	<0.0001			fed-hugin vs. fed-H2O	-0.1244 to 0.1244	>0.9999
	0	0	0	0.2	0.4	0.7	0.9	1								fed-hugin vs. fed-control peptide	-0.1244 to 0.1244	>0.9999
	0	0	0	0.1	0.2	0.7	0.9	1								Row 2
																fed-hugin vs. fed-H2O	-0.1244 to 0.1244	>0.9999
mean	0	0	0.025	0.15	0.325	0.675	0.925	1								fed-hugin vs. fed-control peptide	-0.1244 to 0.1244	>0.9999
SEM	0	0	0.025	0.0288675	0.0478714	0.025	0.025	0								Row 3
fed-hugin	0	0	0	0	0.1	0.1	0.4	0.9								fed-hugin vs. fed-H2O	-0.1494 to 0.09937	>0.9999
	0	0	0	0	0.1	0.4	0.8	1								fed-hugin vs. fed-control peptide	-0.1244 to 0.1244	>0.9999
	0	0	0	0	0.1	0.3	0.5	0.9								Row 4
	0	0	0	0	0.1	0.3	0.6	0.9								fed-hugin vs. fed-H2O	-0.2744 to -0.02563	0.0146
																fed-hugin vs. fed-control peptide	-0.2494 to -0.0006330	0.0486
mean	0	0	0	0	0.1	0.275	0.575	0.925								Row 5
SEM	0	0	0	0	0	0.0629153	0.0853913	0.025								fed-hugin vs. fed-H2O	-0.3494 to -0.1006	0.0002
																fed-hugin vs. fed-control peptide	-0.3494 to -0.1006	0.0002
																Row 6
fed-control peptide	0	0	0	0.2	0.5	0.9	1	1								fed-hugin vs. fed-H2O	-0.5244 to -0.2756	<0.0001
	0	0	0	0.1	0.3	0.6	0.8	1								fed-hugin vs. fed-control peptide	-0.4494 to -0.2006	<0.0001
	0	0	0	0.1	0.2	0.4	0.9	1								Row 7
	0	0	0	0.1	0.3	0.5	1	1								fed-hugin vs. fed-H2O	-0.4744 to -0.2256	<0.0001
																fed-hugin vs. fed-control peptide	-0.4744 to -0.2256	<0.0001
mean	0	0	0	0.125	0.325	0.6	0.925	1								Row 8
SEM	0	0	0	0.025	0.0629153	0.108012	0.0478714	0								fed-hugin vs. fed-H2O	-0.1994 to 0.04937	0.3434
																fed-hugin vs. fed-control peptide	-0.1994 to 0.04937	0.3434
	6.25	12.5	25	50	100	200	400	800			Bonferroni's multiple comparisons test	95% confidence interval	P Value	F (DFn, DFd)		Bonferroni's multiple comparisons test	95% confidence interval	P Value	F (DFn, DFd)
ST-12h-H2O	0.1	0.3	0.3	0.4	0.7	0.9	1	1			ST-12h-hugin vs. ST-12h-H2O	-0.2088 to -0.1224	<0.0001	F (14, 72) = 4.780		Row 1			F (14, 72) = 4.780
	0.1	0.2	0.2	0.5	0.6	0.9	1	1			ST-12h-hugin vs. ST-12h-control peptide	-0.1744 to -0.08806	<0.0001			ST-12h-hugin vs. ST-12h-H2O	-0.1972 to 0.04715	0.3283
	0.1	0.1	0.4	0.8	0.8	1	1	1								ST-12h-hugin vs. ST-12h-control peptide	-0.1722 to 0.07215	0.7037
	0	0.1	0.3	0.4	0.6	1	1	1								Row 2
																ST-12h-hugin vs. ST-12h-H2O	-0.2972 to -0.05285	0.0032
mean	0.075	0.175	0.3	0.525	0.675	0.95	1	1								ST-12h-hugin vs. ST-12h-control peptide	-0.2472 to -0.002847	0.0438
SEM	0.025	0.0478714	0.0408248	0.0946485	0.0478714	0.0288675	0	0								Row 3
ST-12h-hugin	0	0	0.1	0.2	0.3	0.7	1	1								ST-12h-hugin vs. ST-12h-H2O	-0.3722 to -0.1278	<0.0001
	0	0	0	0.2	0.4	0.9	1	1								ST-12h-hugin vs. ST-12h-control peptide	-0.3222 to -0.07785	0.0007
	0	0	0	0.1	0.4	0.9	1	1								Row 4
	0	0	0.1	0.1	0.3	0.8	1	1								ST-12h-hugin vs. ST-12h-H2O	-0.4972 to -0.2528	<0.0001
																ST-12h-hugin vs. ST-12h-control peptide	-0.4222 to -0.1778	<0.0001
mean	0	0	0.05	0.15	0.35	0.825	1	1								Row 5
SEM	0	0	0.0288675	0.0288675	0.0288675	0.0478714	0	0								ST-12h-hugin vs. ST-12h-H2O	-0.4472 to -0.2028	<0.0001
ST-12h-control peptide	0.1	0.1	0.2	0.5	0.8	0.9	1	1								ST-12h-hugin vs. ST-12h-control peptide	-0.4722 to -0.2278	<0.0001
	0	0.1	0.3	0.4	0.6	0.9	1	1								Row 6
	0	0	0.2	0.3	0.7	0.8	0.9	1								ST-12h-hugin vs. ST-12h-H2O	-0.2472 to -0.002847	0.0438
	0.1	0.3	0.3	0.6	0.7	0.9	1	1								ST-12h-hugin vs. ST-12h-control peptide	-0.1722 to 0.07215	0.7037
																Row 7
mean	0.05	0.125	0.25	0.45	0.7	0.875	0.975	1								ST-12h-hugin vs. ST-12h-H2O	-0.1222 to 0.1222	>0.9999
SEM	0.0288675	0.0629153	0.0288675	0.0645497	0.0408248	0.025	0.025	0								ST-12h-hugin vs. ST-12h-control peptide	-0.09715 to 0.1472	>0.9999
																Row 8
																ST-12h-hugin vs. ST-12h-H2O	-0.1222 to 0.1222	>0.9999
																ST-12h-hugin vs. ST-12h-control peptide	-0.1222 to 0.1222	>0.9999

## Sheet: D
	H2O001-1.tif	H2O002-1.tif	H2O003-1.tif	H2O004-1.tif	H2O005-1.tif	H2O0006-1.tif				H2O001-1.tif	H2O002-1.tif	H2O003-1.tif	H2O004-1.tif	H2O005-1.tif	H2O0006-1.tif					hugin017-1.tif	hugin018-1.tif	hugin020-1.tif	hugin022-1.tif	hugin023-1.tif	hugin025-1.tif				hugin017-1.tif	hugin018-1.tif	hugin020-1.tif	hugin022-1.tif	hugin023-1.tif	hugin025-1.tif					Peak
time（sec）	raw data	raw data	raw data	raw data	raw data	raw data				F/F0	F/F0	F/F0	F/F0	F/F0	F/F0					raw data	raw data	raw data	raw data	raw data	raw data				F/F0	F/F0	F/F0	F/F0	F/F0	F/F0					H2O	hugin
0	22.7451	20.8096	39.9962	46.9331	85.622	11.5748				-0.072648	0.0578027	0.135687	0.0011362	-0.0230743	-0.0742087					26.7794	17.4379	59.3799	41.3548	73.2885	18.1398				9.4858e-05	-0.0224963	0.0124316	-0.12876	0.0242131	0.0478011					1.59042	0.522057
1	24.5658	19.5688	34.3846	46.8419	87.7278	11.8405				0.00158465	-0.00527022	-0.0236537	-0.000809197	0.000952353	-0.0529571					26.6559	15.5707	54.6373	45.343	72.8337	19.0602				-0.00451733	-0.127165	-0.0684301	-0.0447389	0.0178573	0.100966					1.08926	0.43878
2	20.5742	22.7821	26.2038	44.0699	93.5317	13.3555				-0.161159	0.15807	-0.255946	-0.0599391	0.0671734	0.0682177					24.4176	18.5695	60.5	44.2208	71.8166	16.8812				-0.0881082	0.040937	0.0315294	-0.0683807	0.00364321	-0.0248988					1.39117	1.10146
3	24.7059	21.7752	33.7846	36.6657	86.0155	9.897				0.00729674	0.106886	-0.0406906	-0.217879	-0.0185846	-0.208405					17.1912	19.262	61.1054	43.8594	66.7115	21.7955				-0.357983	0.0797559	0.0418515	-0.0759945	-0.067701	0.258964					1.10718	0.547004
4	22.2969	20.0894	32.7962	47.7264	94.8195	11.3322				-0.0909218	0.0211931	-0.0687561	0.0180582	0.0818669	-0.0936126					31.8118	18.203	53.5466	51.6268	64.4865	19.194				0.188033	0.0203923	-0.0870266	0.0876447	-0.0987956	0.108694					0.879519	0.529811
5	23.8319	14.9839	41.2423	43.0182	93.8392	16.0764				-0.0283376	-0.238332	0.17107	-0.0823731	0.0706819	0.285844					28.7882	15.214	69.1569	55.0039	84.7775	14.8376				0.0751149	-0.14716	0.17913	0.158792	0.184773	-0.142942					1.80818	0.871073
6	23.6947	25.4748	33.45	46.7416	84.33	8.7276				-0.0339314	0.294946	-0.0501915	-0.00294871	-0.0378157	-0.301937					28.2647	19.0984	57.6005	46.979	72.1002	16.7293				0.0555644	0.0705851	-0.0179073	-0.0102725	0.00760655	-0.033673
7	19.9048	18.8761	24.1038	47.4195	80.8956	13.6412				-0.188451	-0.0404819	-0.315576	0.0115117	-0.0770013	0.0910689					21.8794	14.8819	68.7476	59.9093	62.4156	16.203				-0.182899	-0.165776	0.172152	0.262136	-0.127737	-0.0640734				Mean	1.31096	0.668364
8	17.7535	17.9106	39.0654	45.9574	88.4457	11.2392				-0.276163	-0.0895606	0.109257	-0.0196766	0.00914341	-0.101051					26.1794	18.567	64.1201	48.8922	67.3032	16.597				-0.0223125	0.0407968	0.0932523	0.0300337	-0.0594319	-0.041315				TTEST		0.00468935
9	24.5714	20.883	41.4423	42.5532	83.7461	10.711				0.00181297	0.0615338	0.176749	-0.092292	-0.0444779	-0.143298					24.4588	18	63.8627	49.8121	65.9242	19.1158				-0.0865695	0.00901291	0.0888636	0.0494137	-0.0787036	0.104177
10	20.1064	17.2592	30.9731	43.769	83.8025	10.6877				-0.180232	-0.122673	-0.120523	-0.0663576	-0.0438343	-0.145162					25.1882	16.5043	51.0515	43.9763	60.1345	14.9353				-0.0593296	-0.0748305	-0.129568	-0.0735317	-0.159615	-0.137299
11	26.1541	24.0115	28.2077	44.2766	89.1481	12.4385				0.066342	0.220563	-0.199046	-0.05553	0.0171576	-0.00512707					27.3324	19.4908	52.8431	43.0854	75.8386	16.1534				0.020747	0.0925816	-0.0990213	-0.0923007	0.059851	-0.0669384
12	26.6611	21.6032	28.3808	49.9331	79.1001	13.9502				0.0870132	0.0981433	-0.194131	0.0651296	-0.0974876	0.115784					23.6941	19.3948	60.0637	50.3417	66.3545	17.391				-0.115128	0.0872002	0.0240904	0.060571	-0.0726901	0.00454851
13	22.1232	17.0321	30.1769	41.5623	77.1058	16.3721				-0.0980038	-0.134217	-0.143131	-0.113429	-0.120242	0.309495					28.4265	20.0972	63.9093	48.8463	70.9095	19.3759				0.0616069	0.126574	0.0896582	0.0290667	-0.00903359	0.119201
14	23.605	18.5023	32.9462	40.8875	86.7123	10.99				-0.0375886	-0.059483	-0.0644969	-0.127823	-0.0106342	-0.120983					20.0206	18.797	57.9461	46.6452	78.2445	18.0797				-0.252317	0.0536898	-0.0120148	-0.0173048	0.0934737	0.0443296				P value	0.0047
15	31.1905	18.4495	32.7615	34.4012	89.2003	14.8439				0.271684	-0.062167	-0.0697414	-0.266183	0.0177532	0.187265					24.7794	15.0467	61.549	43.615	63.7482	19.3609				-0.0745965	-0.156538	0.0494149	-0.0811434	-0.109113	0.118335				95% confidence interval	-1.038 to -0.2471
16	22.395	17.6606	32.9346	44.4043	87.9337	12.2558				-0.0869221	-0.102269	-0.0648262	-0.052806	0.00330162	-0.01974					25.3471	18.4957	59.4926	40.5861	82.2323	15.7263				-0.0533954	0.0368	0.0143531	-0.144955	0.149204	-0.0916088				F, DFn, Dfd	1.807, 5, 5
17	23.8711	21.8096	40.7846	38.4164	103.113	18.2525				-0.0267393	0.108635	0.158073	-0.180535	0.176491	0.459896					20.6647	20.6593	67.4436	51.7201	78.2127	16.8511				-0.228263	0.158083	0.149918	0.0896103	0.0930293	-0.0266375
18	26.3305	19.3257	33.7731	52.3222	77.8533	13.0332				0.0735341	-0.0176276	-0.0410171	0.116092	-0.111713	0.042439					25.6706	21.3592	54.3725	51.2194	73.3594	18.1489				-0.041314	0.197317	-0.072945	0.0790619	0.025204	0.0483267
19	25.535	22.6216	38.3154	42.003	94.9351	10.6478				0.0411004	0.149911	0.0879609	-0.104028	0.0831859	-0.148353					28.75	19.5633	77.8064	48.1353	72.7971	15.4992				0.0736883	0.0966457	0.326605	0.0140878	0.0173458	-0.104727
20	30.3193	17.0803	32.0962	44.0973	92.4979	6.7575				0.236164	-0.131767	-0.0886325	-0.0593546	0.055378	-0.459512					27.6176	17.032	62.1642	46.3732	73.8166	14.5835				0.031398	-0.0452496	0.0599041	-0.0230352	0.0315934	-0.15762
21	21.9468	16.0665	36.2154	39.766	90.7828	14.9767				-0.105196	-0.183301	0.0283316	-0.151746	0.0358091	0.197887					19.5971	15.9668	53.0221	44.6557	73.7188	19.1805				-0.268133	-0.104961	-0.0959694	-0.0592185	0.0302266	0.107915
22	27.3389	15.695	29.2769	49.9666	89.3456	14.0565				0.114648	-0.202185	-0.168686	0.0658442	0.019411	0.124286					28.9588	16.0713	58.7721	50.7332	72.3154	17.2045				0.081486	-0.0991028	0.00206854	0.0688189	0.010614	-0.0062242
23	19.5434	22.7638	23.65	47.2219	86.2666	14.1728				-0.203186	0.157139	-0.328461	0.00729663	-0.0157196	0.133588					24.1382	18.7171	65.0686	46.0315	68.1932	15.8947				-0.0985425	0.0492109	0.109424	-0.0302339	-0.0469941	-0.0818816
24	30.6919	16.0413	31.5192	48.4681	76.3766	10.7375				0.251355	-0.184582	-0.105016	0.0338795	-0.128562	-0.141179					33.4941	17.3198	53.7034	48.8371	83.4743	17.5714				0.25086	-0.0291166	-0.0843532	0.0288729	0.166561	0.0149689
25	24.0168	19.406	41.5769	38.9271	80.2722	13.4751				-0.0207989	-0.0135457	0.180571	-0.169641	-0.0841142	0.0777837					33.2529	15.647	72.8922	47.7346	73.9804	12.3263				0.241852	-0.122887	0.242817	0.00564604	0.0338825	-0.288001
26	26.5686	21.3716	33.2038	42.2036	88.9168	18.0432				0.0832418	0.0863705	-0.0571824	-0.0997494	0.0145185	0.443156					27.9382	15.631	49.2206	44.7464	70.3203	18.818				0.043371	-0.123784	-0.160785	-0.0573077	-0.0172677	0.0869757
27	20.1709	17.1904	34.5885	41.2128	89.0042	11.9568				-0.177602	-0.12617	-0.017864	-0.120884	0.0155158	-0.043655					30.3559	16.5055	60.5539	43.4192	85.3643	17.2737				0.133662	-0.0747632	0.0324484	-0.0852684	0.192973	-0.00222704
28	28.4706	18.0528	32.3654	46.693	86.8223	14.4618				0.160789	-0.0823322	-0.0809886	-0.0039854	-0.00937918	0.156703					23.2206	17.9643	60.8701	43.1564	75.9487	14.6301				-0.132811	0.00701171	0.0378396	-0.0908049	0.0613897	-0.154928
29	27.5434	20.8486	37.2192	43.0395	89.1932	8.3455				0.122986	0.0597851	0.0568344	-0.0819187	0.0176722	-0.332499					29.4088	18.0861	50.5147	43.9028	80.0049	20.582				0.0982916	0.0138394	-0.138721	-0.0750802	0.118075	0.188869
30	18.8095	21.305	38.1692	50.1155	88.1552	11.8272				-0.233108	0.0829851	0.0838095	0.0690204	0.00582888	-0.0540209					36.15	18.631	61.576	44.8633	68.6112	18.412				0.350046	0.0443844	0.0498752	-0.0548449	-0.0411525	0.0635241
31	26.3081	23.7959	34.35	47.155	88.7701	11.1894				0.0726208	0.209604	-0.0246361	0.00586958	0.0128447	-0.105034					24.4265	17.2239	55.9167	46.2733	77.2934	18.0917				-0.0877758	-0.0344924	-0.0466162	-0.0251398	0.080182	0.0450227
32	27.944	11.0986	32.7885	37.234	92.8604	11.7841				0.139319	-0.435831	-0.0689747	-0.205757	0.059514	-0.0574682					26.8294	17.2337	55.9902	47.1853	71.0147	20.5865				0.00196214	-0.033943	-0.0453631	-0.00592631	-0.00756341	0.189129
33	24.395	17.3532	56.1115	49.4529	85.7743	10.7209				-0.00537912	-0.117895	0.593279	0.0548864	-0.0213366	-0.142506					24.2676	16.1033	50.4387	45.2418	77.3496	17.4511				-0.09371	-0.097309	-0.140017	-0.0468709	0.0809674	0.00802004
34	29.5378	19.6651	33.2808	47.6505	74.1777	15.3854				0.204301	-0.000375059	-0.0549959	0.0164392	-0.153651	0.230576					34.1647	18.1046	63.4093	39.6846	70.3594	14.5549				0.275904	0.0148764	0.0811331	-0.163947	-0.0167213	-0.159272
35	30.3333	21.4151	34.95	42.0912	90.8942	17.9468				0.236734	0.0885817	-0.00759922	-0.102147	0.0370802	0.435445					24.35	17.1956	62.3725	51.0315	70.5183	17.8707				-0.0906327	-0.0360788	0.0634556	0.0751033	-0.0145006	0.0322572
36	24.5182	19.078	40.6692	43.0547	91.5063	12.9103				-0.000356071	-0.0302188	0.154797	-0.0815945	0.0440641	0.0326091					27.0412	22.2964	53.0711	53.477	69.1785	14.7368				0.00987196	0.249853	-0.0951339	0.126624	-0.0332245	-0.148765
37	28.1821	20.6193	36.1923	48.769	91.677	7.2027				0.149027	0.0481293	0.0276757	0.040298	0.0460117	-0.423904					22.5412	20.5793	45.848	52.9041	71.5061	14.4391				-0.158184	0.153599	-0.218288	0.114554	-0.000696052	-0.165961
38	25.7227	17.9495	44.9385	55.7872	90.7884	10.0033				0.0487532	-0.0875832	0.276023	0.190004	0.035873	-0.199903					33.75	19.4625	60.5392	52.4823	65.1345	18.3654				0.260417	0.0909952	0.0321977	0.105668	-0.0897397	0.0608323
39	26.8067	22.789	50.4077	51.1337	77.8787	12.1495				0.0929495	0.15842	0.43132	0.0907398	-0.111423	-0.0282423					30.3235	17.0603	54.5196	45.071	67.5941	14.5459				0.132452	-0.0436632	-0.0704369	-0.0504692	-0.0553666	-0.159792
40	23.5126	20.4266	31.6115	40.0881	77.7038	13.206				-0.0413559	0.0383338	-0.102396	-0.144875	-0.113419	0.0562602					30.5412	16.8057	51.2819	48.3968	72.4939	16.8707				0.140582	-0.0579351	-0.12564	0.0195969	0.0131085	-0.0255053
41	20.9412	14.2752	43.2192	56.7173	78.378	9.3223				-0.146196	-0.274357	0.227204	0.209844	-0.105727	-0.254371					31.6029	20.7909	62.1912	42.2641	67.2592	18.1188				0.180232	0.16546	0.0603644	-0.109603	-0.0600468	0.0465881
42	23.0812	19.8578	34.1769	52.1429	93.1721	15.0664				-0.0589447	0.00942035	-0.0295513	0.112267	0.0630705	0.205061					23.4235	15.4772	57.5956	43.2825	78.176	16.0451				-0.125234	-0.132406	-0.0179909	-0.0881483	0.0925164	-0.0731941
43	24.8627	15.7454	32.8077	52.3495	86.1946	10.4352				0.0136897	-0.199623	-0.0684296	0.116674	-0.0165411	-0.165358					31.85	18.9557	47.4828	43.5335	65.0587	15.6677				0.18946	0.0625859	-0.190415	-0.0828604	-0.090799	-0.0949937
44	22.1597	23.1147	36.7731	49.8237	89.6333	12.8405				-0.0965157	0.174977	0.0441675	0.062796	0.0226936	0.0270262					22.7559	21.3419	73.3235	45.3824	61.7653	18.9504				-0.150165	0.196347	0.250171	-0.0439088	-0.136825	0.0946234
45	23.2941	18.1376	33.1385	50.8632	85.1086	7.0598				-0.0502645	-0.0780216	-0.0590365	0.0849697	-0.0289321	-0.435334					21.8206	14.6224	45.3676	48.0723	72.1051	18.4677				-0.185095	-0.180323	-0.226479	0.0127605	0.00767502	0.0667414
46	24.1765	21.6284	32.4269	57.4742	93.6107	14.8073				-0.0142877	0.0994243	-0.0792423	0.22599	0.0680748	0.184337					28.3471	13.8807	48.1103	47.8095	65.4597	17.5098				0.0586417	-0.2219	-0.179716	0.00722399	-0.085195	0.0114107
47	24.1849	12.7936	39.8846	64.7538	92.2003	14.691				-0.0139452	-0.34967	0.132518	0.381272	0.0519825	0.175035					25.6412	18.9951	65.9461	43.7043	69.4523	15.1774				-0.042412	0.0647945	0.124386	-0.0792621	-0.0293981	-0.123315
48	18.8824	27.6376	30.0846	50.9392	88.7221	11.1827				-0.230136	0.404887	-0.145752	0.0865909	0.0122971	-0.10557					23.1676	16.3383	63.1422	43.9396	71.22	17.9173				-0.13479	-0.0841358	0.0765791	-0.0743049	-0.00469432	0.0349489
49	24.1765	20.6078	38.4385	54.7781	93.1298	14.4252				-0.0142877	0.0475447	0.0914563	0.168479	0.0625878	0.153776					25.2618	17.0959	46.2794	48.8975	72.0758	22.6692				-0.0565809	-0.0416676	-0.210933	0.0301454	0.00726555	0.309431
50	22.1204	24.6583	26.0231	47.4559	86.3047	12.0299				-0.098118	0.253441	-0.261077	0.0122881	-0.0152849	-0.0378083					25.4294	18.4969	70.7868	50.7937	68.3619	16.8842				-0.0503218	0.0368673	0.20692	0.0700935	-0.0446365	-0.0247255
51	30.7787	16.9289	36.4038	64.4012	95.8519	11.6811				0.254894	-0.139463	0.0336812	0.373751	0.0936463	-0.0657065					30.8882	16.1931	54.6814	44.3495	73.269	17.7263				0.153541	-0.0922752	-0.0676782	-0.0656694	0.0239406	0.0239163
52	23.5238	17.1927	31.3692	40.6444	85.2299	15.0432				-0.0408993	-0.126053	-0.109276	-0.133009	-0.0275481	0.203206					27.2882	15.5252	58.8554	46.7648	73.8533	14.1474				0.0190963	-0.129715	0.00348881	-0.0147852	0.0321063	-0.18281
53	24.5518	17.5092	38.6731	45.5775	101.107	11.4452				0.00101385	-0.109965	0.0981177	-0.0277803	0.153608	-0.0845745					26.7971	18.5474	56.826	44.134	69.2983	16.1068				0.000755877	0.0396981	-0.0311126	-0.0702094	-0.0315502	-0.0696302
54	22.1064	20.8807	36.8808	51.8602	87.8364	8.6512				-0.0986888	0.0614169	0.0472256	0.106237	0.00219145	-0.308048					29.4882	23.0603	59.7794	49.276	68.4841	18.018				0.101257	0.292674	0.0192431	0.0381194	-0.0429288	0.0407656
55	30.2157	19.3716	33.45	52.5441	87.7786	16.7309				0.23194	-0.0152944	-0.0501915	0.120825	0.00153197	0.338193					18.2412	15.0652	57.8922	51.3049	69.2812	19.6872				-0.31877	-0.155501	-0.0129338	0.0808631	-0.0317892	0.137183
56	26.5182	21.8853	35.0538	52.1672	102.56	10				0.0811869	0.112483	-0.00465184	0.112785	0.170183	-0.200166					28.0147	20.4613	56.6863	59.2392	70.6724	21.003				0.046228	0.146984	-0.0334945	0.248019	-0.0123471	0.213187
57	20.4202	23.9312	39.3	48.5866	84.4584	11.4352				-0.167438	0.216481	0.115918	0.0364072	-0.0363507	-0.0853744					26.4059	18.2202	61.5564	50.8975	75.7702	17.9774				-0.0138538	0.0213565	0.0495411	0.0722803	0.0588951	0.0384205
58	26.3613	19.961	37.8077	45.769	83.2313	16.9801				0.0747899	0.0146663	0.0735448	-0.0236954	-0.0503516	0.358125					32.5059	16.1611	57.2255	53.1432	74.5795	16.3609				0.213955	-0.094069	-0.0243011	0.119591	0.042255	-0.0549527
59	23.9636	22.7913	36.2423	39.9119	76.6107	13.1528				-0.0229679	0.158537	0.0290955	-0.148634	-0.125891	0.052005					29.0147	17.2743	54.4387	49.8344	65.533	16.2361				0.0835737	-0.0316671	-0.0718162	0.0498835	-0.0841706	-0.0621615
60	21.8487	24.5619	41.3	50.0091	98.4753	14.2757				-0.109196	0.248541	0.172708	0.0667508	0.123579	0.141818					33.9765	25.6667	59.0613	54.9014	67.132	16.0707				0.268875	0.43878	0.00699942	0.156632	-0.0618245	-0.0717154
61	41.8039	27.4174	64.1692	60.2857	153.835	18.9601				0.704408	0.393693	0.822076	0.285962	0.755219	0.516492					40.4676	19.9508	79.576	58.1997	79.0782	29.0857				0.51129	0.118367	0.356777	0.226119	0.105125	0.680064
62	56.2381	41.1009	58.1654	43.7994	139.677	35.1096				1.29291	1.08926	0.651599	-0.0657092	0.59368	1.80818					28.4735	24.3899	60.2377	57.4717	109.467	32.3925				0.0633622	0.367207	0.0270571	0.210782	0.529811	0.871073
63	43.3165	38.4748	54.7385	63.4255	121.989	24.103				0.766079	0.955768	0.554293	0.352938	0.391861	0.927839					32.6294	25.1033	77.1446	45.0604	101.262	29.8947				0.218567	0.407197	0.315321	-0.0506925	0.41514	0.726794
64	60.0616	38.1216	75.6731	91.3587	146.261	15.1794				1.4488	0.937814	1.14873	0.948785	0.6688	0.214099					28.8559	23.262	111.873	51.4455	88.4034	28.8752				0.0776432	0.303981	0.907436	0.0838252	0.235445	0.667905
65	63.535	40.1972	79.9077	80.4073	142.827	16.4086				1.59042	1.04332	1.26897	0.715179	0.629615	0.312415					27.2618	20.6913	123.252	45.707	91.5061	26.4632				0.0181104	0.159877	1.10146	-0.0370703	0.278806	0.528582
66	53.7815	37.8899	63.4077	98.7842	155.889	14.7575				1.19275	0.926036	0.800454	1.10718	0.77865	0.180354					28.8794	24.3137	84.701	43.9869	92.0905	20.4451				0.0785208	0.362935	0.444158	-0.0733084	0.286973	0.180961
67	60.7507	30.7913	66.05	85.8085	131.92	13.5183				1.4769	0.565197	0.875481	0.830393	0.50517	0.081239					25.0706	18.8967	71.2721	54.2339	81.1491	22.7534				-0.0637214	0.0592786	0.215194	0.14257	0.134066	0.314294
68	41.493	31.9151	84.2115	75.5957	128.406	12.1462				0.691732	0.622322	1.39117	0.612542	0.465083	-0.0285062					30.5324	22.1046	75.576	50.5637	88.5281	21.8677				0.140253	0.239101	0.288576	0.0652479	0.237188	0.263134
69	55.5042	27.9954	63.4538	70.7143	164.729	13.1262				1.26299	0.423074	0.801763	0.508416	0.879519	0.0498775					28.6794	17.3284	64.7647	49.8279	88.3423	19.8316				0.0710516	-0.0286345	0.104243	0.0497465	0.234591	0.145524
70	42.493	38.1101	74.2346	95.1641	152.31	14.9767				0.732504	0.937229	1.10788	1.02996	0.737823	0.197887					29.5059	21.8967	60.3333	55.3469	93.4401	23.5459				0.101918	0.227447	0.0286871	0.166018	0.305833	0.360071
71	30.0896	25.7248	56.1154	88.535	151.334	17.8007				0.226798	0.307654	0.59339	0.888552	0.726687	0.42376					39.9647	17.6544	64.5588	46.5427	92.3472	14.7353				0.492509	-0.0103601	0.100732	-0.0194642	0.29056	-0.148851
72	36.0756	28.6995	58.0769	74.5502	126.413	8.99				0.470857	0.458866	0.649086	0.59024	0.442344	-0.28095					29.8441	20.4822	51.3211	49.1695	86.6455	14.7218				0.114548	0.148156	-0.124972	0.0358757	0.210878	-0.149631
73	39.6639	26.1927	58.7769	75.2371	123.251	16.6346				0.617157	0.331439	0.668963	0.604893	0.406264	0.330491					33.3676	19.7946	54.2672	49.8357	87.7971	18.6526				0.246136	0.109612	-0.0747403	0.0499108	0.226972	0.0774217
74	37.7815	27.4908	62.9654	74.8967	127.023	12.3987				0.540409	0.397424	0.787894	0.597631	0.449296	-0.0083104					23.7647	18.5793	54.9044	48.5585	76.4401	12.5609				-0.112491	0.0414863	-0.063876	0.0230035	0.068257	-0.27445
75	41.1008	26.3578	50.9077	66.6778	126.468	17.3389				0.675741	0.339831	0.445518	0.422313	0.442972	0.386823					36.1059	17.6605	39.1936	41.4205	88.5721	16.2647				0.348399	-0.0100182	-0.331746	-0.127376	0.237803	-0.0605094
76	38.8543	25.5803	50.9077	74.307	120.018	15.0498				0.584148	0.300309	0.445518	0.585053	0.369379	0.203733					40.7559	15.9496	48.6716	63.4967	83.8655	18.0496				0.522057	-0.105925	-0.170146	0.337713	0.172028	0.0425909
77	39.8039	23.0023	51.0615	88.8541	117.416	14.5615				0.622865	0.169263	0.449885	0.895359	0.339688	0.164678					32.3765	17.1267	48.1814	73.431	97.4205	14.7534				0.209122	-0.039941	-0.178504	0.547004	0.36146	-0.147806
78	30.1008	24.9587	50.4846	80.2644	117.797	15.5482				0.227255	0.268712	0.433504	0.712131	0.344033	0.243597					32.4824	16.3702	36.7868	63.9711	82.1907	16.0526				0.213077	-0.0823476	-0.372782	0.347708	0.148622	-0.0727609
79	25.8599	27.5436	47.8769	76.1763	105.662	8.6312				0.0543471	0.400108	0.359458	0.624927	0.205571	-0.309648					41.0118	16.4908	41.1936	70.3719	71.9364	13.6256				0.531613	-0.0755872	-0.297646	0.482556	0.00531743	-0.212951
80	32.6134	22.0275	46.2654	65.7751	105.051	9.7409				0.329697	0.119711	0.3137	0.403057	0.198603	-0.22089					33.7853	15.8487	42.0294	68.2641	75.7335	17.6556				0.261735	-0.111581	-0.283396	0.43815	0.0583822	0.0198325
81	27.028	19.055	55.6615	58	106.993	10.4684				0.101972	-0.0313879	0.580501	0.237206	0.220763	-0.162702					42.9353	15.9914	44.4608	71.9579	69.6015	20.0211				0.603448	-0.103582	-0.24194	0.515969	-0.027313	0.15647
82	30.6218	20.4243	54.8731	70.3891	102.597	16.691				0.248497	0.0382169	0.558115	0.501479	0.170602	0.335002					43.4441	12.5228	45.098	61.4481	67.3814	14.182				0.622449	-0.298019	-0.231076	0.294554	-0.0583391	-0.180812
83	31.1148	22.3945	54.3231	74.2432	100.353	17.4518				0.268597	0.138367	0.542497	0.583692	0.144998	0.395853					25.4118	18.321	37.9461	66.3982	68.8044	16.7444				-0.0509791	0.027007	-0.353016	0.39884	-0.0384525	-0.0328008
84	32.2969	13.078	51.7692	58.459	101.846	8.0498				0.316793	-0.335213	0.46998	0.246997	0.162041	-0.35615					31.6235	14.5424	41.6691	65.5624	65.4768	15.7564				0.181001	-0.184807	-0.289539	0.381232	-0.084956	-0.0898702
85	26.6162	19.1124	39	47.924	104.478	13.6013				0.0851825	-0.0284701	0.1074	0.0222732	0.192069	0.0878776					33.5794	11.1415	48.1838	59.0434	61.2127	11.7444				0.254045	-0.375449	-0.178463	0.243894	-0.144547	-0.321614
86	26.0056	20.5206	34.8	43.1824	97.6559	9.3522				0.0602875	0.0431121	-0.0118585	-0.0788705	0.11423	-0.25198					29.3324	17.0861	44.8186	54.092	64.4083	12.7609				0.0954384	-0.0422169	-0.23584	0.13958	-0.0998884	-0.262898
87	25.1317	16.7683	34.2385	61.6444	97.9013	14.0897				0.0246572	-0.147626	-0.0278022	0.314945	0.117029	0.126941					38.3824	15.1169	47.0907	54.1288	52.8264	12.5068				0.433417	-0.152603	-0.1971	0.140355	-0.261746	-0.277575
88	25.451	20.1881	40.5423	46.5471	102.006	17.2924				0.0376756	0.0262103	0.151193	-0.00709761	0.163858	0.383104					34.6912	16.2509	40.0907	58.7083	62.3105	14.6586				0.295566	-0.0890351	-0.316451	0.236834	-0.129205	-0.153282
89	22.0868	14.0092	43.8385	50.2188	104.004	11.3953				-0.0994879	-0.287878	0.244789	0.0712239	0.186662	-0.0885657					28.6382	15.5301	46.3897	51.8844	63.643	15.8361				0.069513	-0.12944	-0.209052	0.0930717	-0.110584	-0.0852665
90	24.8403	16.4771	35.9269	59.0578	95.8858	14.9236				0.0127764	-0.162429	0.0201397	0.25977	0.0940331	0.19364					33.7735	16.7196	35.6225	49.5598	59.2616	12.0842				0.261294	-0.0627615	-0.392634	0.0440983	-0.171814	-0.301986
91	24.3305	18.6193	31.7077	54.8663	100.622	15.2326				-0.00800888	-0.0535356	-0.0996639	0.17036	0.148072	0.218354					25.3824	15.6851	43.6348	51.5335	64.2372	11.6331				-0.0520771	-0.120752	-0.256024	0.0856792	-0.10228	-0.328042
92	29.5714	19.8096	41.3615	51.4681	101.984	11.3322				0.205671	0.00697023	0.174454	0.0978729	0.163618	-0.0936126					31.2324	20.6482	50.1887	49.9514	55.5477	14.6211				0.166395	0.157461	-0.144279	0.0523484	-0.223716	-0.155448
93	25.084	17.7271	41.6423	41.5866	78.2496	14.0465				0.0227124	-0.0988883	0.182428	-0.112911	-0.107192	0.123486					34.2471	19.3137	52.5858	58.6505	53.8875	17.8662				0.278981	0.082654	-0.103408	0.235616	-0.246918	0.0319973
94	23.6611	16.0115	38.7346	50.4164	96.5853	10.9269				-0.0353013	-0.186096	0.099864	0.0754389	0.102014	-0.12603					17.3294	19.6384	49.7696	53.1551	66.3081	14.6541				-0.352822	0.100856	-0.151425	0.119842	-0.0733386	-0.153542
95	20.7871	16.3142	29.7308	44.6657	93.8984	16.3987				-0.152479	-0.170709	-0.155798	-0.04723	0.0713574	0.311623					24.6118	17.8278	37.8505	52.3995	58.4303	12.6602				-0.0808556	-0.000639976	-0.354646	0.103924	-0.183431	-0.268715
96	18.9636	15.4243	31.1846	42.8815	86.7292	18.8704				-0.226825	-0.215945	-0.114517	-0.085289	-0.0104414	0.509318					24.6441	18.0295	58.1152	49.3548	65.4205	13.7835				-0.0796494	0.0106666	-0.00913165	0.0397795	-0.0857428	-0.20383
97	23.0336	22.0688	31.7346	42.4498	88.7024	10.9169				-0.0608854	0.121811	-0.0989001	-0.0944977	0.0120723	-0.12683					27.1912	13.8278	41.9216	58.8344	66.621	14.6361				0.0154738	-0.224865	-0.285234	0.23949	-0.0689657	-0.154582
98	17.2381	17.867	36.45	46.4711	91.8251	16.4053				-0.297177	-0.0917769	0.0349931	-0.00871878	0.0477015	0.312151					27.5412	19.1181	36.4534	68.7845	54.4254	11.6466				0.0285448	0.0716894	-0.378467	0.449114	-0.2394	-0.327263
99	25.3445	18.9564	29.3885	40.304	91.2891	15.8472				0.0333334	-0.0364	-0.165517	-0.14027	0.0415859	0.267512					29.0294	16.6507	47.4461	60.6675	59.6479	15.5654				0.0841226	-0.0666238	-0.191041	0.278109	-0.166415	-0.100903
100	22.8319	17.6376	32.6538	38.0638	96.1199	10.6013				-0.0691091	-0.103438	-0.0727995	-0.188056	0.0967041	-0.152072					22.8647	14.0381	43.0147	62.4428	59.2543	20.7113				-0.146102	-0.213076	-0.266596	0.31551	-0.171916	0.196338
101	26.1681	14.4748	35.5154	37.6657	100.204	12.9668				0.0669128	-0.264211	0.00845524	-0.196548	0.143308	0.0371281					31.7941	16.5916	47.4681	56.5427	65.489	13.7023				0.187372	-0.0699367	-0.190665	0.19121	-0.0847855	-0.20852
102	21.5042	14.9839	30.9692	44.6626	95.7348	9.0963				-0.123241	-0.238332	-0.120634	-0.0472961	0.0923102	-0.272447					28.0794	13.203	51.826	68.7477	63.0196	14.8316				0.0486442	-0.259889	-0.116363	0.448338	-0.119296	-0.143289
103	15.5938	14.8234	23.0308	35.1246	83.2849	16				-0.364217	-0.24649	-0.346043	-0.250752	-0.04974	0.279734					28.0029	14.3616	58.0931	67.2996	64.5281	16.6241				0.0457873	-0.194942	-0.00950846	0.417831	-0.0982142	-0.0397496
104	25.5406	15.9725	36.5462	39.9544	91.4612	11.8439				0.0413287	-0.188079	0.0377247	-0.147727	0.0435495	-0.0526852					26.7588	15.3665	48.9093	68.6741	71.2567	14.5429				-0.000674463	-0.138611	-0.166093	0.446788	-0.00418144	-0.159965
105	23.8459	14.4908	26.35	45.0821	89.2764	10.7674				-0.0277668	-0.263397	-0.251795	-0.0383477	0.0186215	-0.138787					33.3971	17.0664	48.6765	76.2615	54.934	16.0195				0.247237	-0.0433212	-0.170062	0.606635	-0.232293	-0.0746728
106	18.5742	16.2821	30.7692	38.7933	81.0522	13.6977				-0.242702	-0.172341	-0.126313	-0.172495	-0.0752146	0.095588					26.7353	18.6015	47.8456	82.1498	62.7311	13.7263				-0.00155209	0.0427308	-0.184229	0.730686	-0.123327	-0.207134
107	13.6303	13.172	28.2692	39.9544	92.0973	14.309				-0.444272	-0.330435	-0.1973	-0.147727	0.0508073	0.144482					22.1971	19.0812	63.2819	79.9816	59.1027	15.5353				-0.171034	0.069621	0.078961	0.685008	-0.174035	-0.102641
108	21.6134	12.1674	34.4462	42.3769	89.8434	10.9535				-0.118789	-0.381501	-0.0219046	-0.0960527	0.0250908	-0.123902					22.7029	18.9188	53.402	78.5401	61.8557	12.6286				-0.152145	0.0605174	-0.089492	0.654639	-0.135561	-0.27054
109	17.7143	13.7454	28.1385	45.5137	82.6798	14.392				-0.277761	-0.301288	-0.201011	-0.0291412	-0.0566441	0.15112					26.2706	17.8413	55.4314	83.6439	66.9755	13.5549				-0.0189066	0.000116784	-0.0548906	0.762163	-0.0640116	-0.217034
110	16.7815	12.6514	33.1192	47.0547	93.6812	13.1927				-0.315793	-0.356899	-0.0595846	0.00373007	0.0688792	0.0551964					25.9118	17.1415	52.1569	71.8817	57.533	15.0632				-0.0323063	-0.0391114	-0.110721	0.514364	-0.195971	-0.129911
111	18.1737	13.6422	30.5808	53.7872	94.1848	11.9203				-0.259031	-0.306534	-0.131662	0.147342	0.0746251	-0.0465744					25.4882	16.1341	57.2917	84.1524	64.6088	13.6767				-0.0481259	-0.0955825	-0.0231724	0.772876	-0.0970864	-0.209999
112	21.6359	13.8349	34.4885	46.2158	92.7997	7.1229				-0.117872	-0.296738	-0.0207035	-0.0141646	0.0588215	-0.430287					27.3706	17.0689	53.5907	71.2733	55.9438	12.003				0.0221736	-0.0431811	-0.0862747	0.501546	-0.218181	-0.306676
113	21.5434	13.9381	33.7846	41.8207	84.4429	11.7375				-0.121643	-0.291492	-0.0406906	-0.107917	-0.0365275	-0.0611954					31.4735	17.3284	59.2328	82.2208	59.9584	14.7278				0.175399	-0.0286345	0.00992351	0.732182	-0.162076	-0.149285
114	19.4118	21.039	28.65	38.0578	86.2877	15.5249				-0.208552	0.0694636	-0.186487	-0.188184	-0.0154788	0.241734					29.2265	18.2755	61.5245	75.5335	69.7237	13.6932				0.0914835	0.0244564	0.0489972	0.591298	-0.0256052	-0.209046
115	21.9076	15.9748	31.3038	43.6626	86.7024	12.9734				-0.106794	-0.187962	-0.111133	-0.0686273	-0.0107472	0.037656					25.2324	14.829	68.8897	75.5388	52.044	14.618				-0.0576789	-0.168742	0.174574	0.591409	-0.272681	-0.155627
116	26.6471	16.7454	31.2269	39.4377	83.3667	14.3654				0.0864424	-0.148791	-0.113316	-0.158749	-0.0488067	0.148993					19.6059	13.7897	57.1569	90.5703	61.6015	16.8526				-0.267804	-0.227001	-0.0254707	0.908085	-0.139114	-0.0265508
117	20.07	14.2294	23.1731	37.7447	90.3695	16.9767				-0.181716	-0.276685	-0.342003	-0.194863	0.0310935	0.357853					25.6882	15.2079	46.2672	72.9488	68.0856	14.5068				-0.0406567	-0.147502	-0.211141	0.536845	-0.0484978	-0.16205
118	21.9832	17.828	37.8038	42.5623	99.7772	12.2126				-0.103712	-0.0937593	0.0734341	-0.0920979	0.138433	-0.0231953					33.2059	15.9668	64.9657	76.6268	51.9707	16.1669				0.240097	-0.104961	0.10767	0.614331	-0.273705	-0.0661586
119	16.112	13.7018	31.5769	35.1945	88.4175	14.5947				-0.34309	-0.303504	-0.103378	-0.249261	0.00882166	0.167333					31.2559	20.9545	53.2426	80.9317	59.7213	14.0195				0.167273	0.174631	-0.0922098	0.705024	-0.16539	-0.190198
120	21.2269	18.2913	40.3	39.8328	88.0226	7.9568				-0.134547	-0.0702087	0.144313	-0.150321	0.00431595	-0.363588					24.4618	19.6101	51.8627	73.3259	55.8729	18.9429				-0.0864575	0.0992691	-0.115737	0.544789	-0.219171	0.0941902
121	23.0588	17.4954	32.0346	45.848	87.9295	10.1561				-0.059858	-0.110666	-0.0903816	-0.0220102	0.0032537	-0.187681					33.2118	19.6962	49.5221	89.1406	65.8191	17.4391				0.240317	0.104096	-0.155645	0.877965	-0.0801724	0.00732689
122	19.958	21.0986	46.8692	33.8723	96.8632	15.711				-0.186282	0.0724932	0.330845	-0.277465	0.105185	0.256618					29.4912	13.7122	43.9902	69.9001	61.9462	16.4797				0.101369	-0.231345	-0.249964	0.472616	-0.134296	-0.0480905
123	20.8627	17.2362	39.8	43.7872	78.2214	8.1395				-0.149396	-0.123842	0.130116	-0.0659694	-0.107513	-0.348975					20.8206	15.802	50.5956	76.7779	66.8166	15.4165				-0.222441	-0.114199	-0.137341	0.617514	-0.0662322	-0.109504
124	15.7619	10.1193	31.8846	43.0426	93.4838	14.0299				-0.357364	-0.485611	-0.0946409	-0.0818526	0.0666269	0.122158					21.65	16.9446	54.8775	74.1353	73.2152	16.2902				-0.191466	-0.0501489	-0.0643347	0.561841	0.0231888	-0.0590365
125	25.2437	15.7982	43.4962	50.4802	85.0212	13.3023				0.0292237	-0.196939	0.235069	0.0767999	-0.0299293	0.0639626					19.8618	21.9508	55.7108	74.933	63.0807	14.2827				-0.258248	0.23048	-0.0501268	0.578647	-0.118442	-0.174995
126	25.6807	16.5826	31.3038	52.6444	83.6671	13.1429				0.0470408	-0.157066	-0.111133	0.122965	-0.0453792	0.0512132					21.65	16.7478	53.4069	65.0999	71.4254	17.0887				-0.191466	-0.0611808	-0.0894085	0.371489	-0.00182384	-0.0129131
127	19.8543	16.9862	40.3692	39.307	83.9365	9.0365				-0.19051	-0.13655	0.146278	-0.161537	-0.0423054	-0.27723					23.8059	19.0603	51.951	74.8029	66.489	14.5489				-0.110953	0.0684494	-0.114232	0.575906	-0.0708105	-0.159618
128	19.3838	14.9083	24.7115	39.2553	96.3695	14.7641				-0.209693	-0.242175	-0.29832	-0.16264	0.099552	0.180882					24.9824	15.3887	58.1127	71.6531	58.934	14.6617				-0.0670153	-0.137367	-0.00917427	0.509548	-0.176392	-0.153103
129	19.5154	14.594	41.4077	40.3435	91.3738	14.5282				-0.204328	-0.258151	0.175766	-0.139427	0.0425523	0.162014					24.4059	20.9791	42.3211	69.4744	44.0244	20.5895				-0.0885451	0.17601	-0.278422	0.463648	-0.384755	0.189302
130	20.6527	17.2729	34.9692	36.9149	90.0832	11.1395				-0.157958	-0.121976	-0.00705404	-0.212563	0.0278269	-0.109025					21.4206	21.1144	47.1299	68.6189	59.4059	17.4075				-0.200033	0.183595	-0.196432	0.445625	-0.169797	0.00550159
131	15.7507	11.9702	40.1923	46.5684	95.1805	9.3488				-0.35782	-0.391526	0.141255	-0.00664326	0.0859858	-0.252252					24.6676	18.1574	48.7647	65.7096	62.7604	15.4496				-0.0787717	0.0178362	-0.168558	0.384333	-0.122918	-0.107592
132	17.4398	14.1422	43.3577	31.5532	91.4175	10.9601				-0.288953	-0.281118	0.231136	-0.326934	0.0430509	-0.123374					17.1559	17.8093	52.1029	74.5926	55.2665	14.5669				-0.359301	-0.00167702	-0.111642	0.571475	-0.227646	-0.158579
133	19.1597	13.078	38.8577	32.9483	87.1001	8.9801				-0.21883	-0.335213	0.103359	-0.297175	-0.00620955	-0.281741					20.1588	19.326	55.0025	79.0959	57.9291	12.4105				-0.247156	0.0833435	-0.0622034	0.666348	-0.190436	-0.283138
134	17.2325	17.5344	29.4769	44.4894	83.5557	11.6047				-0.297405	-0.108684	-0.163007	-0.0509907	-0.0466503	-0.0718172					24.8618	20.6273	54.3824	83.3522	59.6675	17.6165				-0.0715192	0.15629	-0.0727762	0.756018	-0.166142	0.017574
135	16.6639	19.1353	35.85	39.2067	87.1552	11.6578				-0.320588	-0.0273061	0.0179562	-0.163677	-0.00558087	-0.0675701					34.5912	21.187	57.3186	74.594	60.1932	13.4662				0.291832	0.187664	-0.0227137	0.571505	-0.158795	-0.222158
136	19.2549	12.8761	35.6154	42.8116	86.0606	12.8073				-0.214949	-0.345476	0.0112947	-0.0867801	-0.01807	0.0243708					22.7971	16.5301	65.701	70.6873	64.2763	17.418				-0.148627	-0.0733842	0.120207	0.489201	-0.101733	0.0061081
137	19.084	16.5344	42.4	31.2948	94.6544	9.5515				-0.221917	-0.159516	0.203943	-0.332446	0.0799831	-0.236039					29.9235	15.6002	57.6054	75.9304	60.6064	13.6466				0.117513	-0.125511	-0.0178238	0.599659	-0.15302	-0.211738
138	24.2857	13.0849	37.5577	38.6383	87.7334	12.9369				-0.00983545	-0.334863	0.0664461	-0.175801	0.00101625	0.0347366					23.5118	16.7048	63.3578	66.1419	53.8117	12.5188				-0.121936	-0.0635912	0.0802551	0.393441	-0.247977	-0.276882
139	20.8207	15.8303	36.3	42.3587	85.4062	14.2824				-0.151109	-0.195307	0.0307339	-0.0964409	-0.0255365	0.142354					23.0382	20.4982	53.5221	69.9882	65.956	16.5774				-0.139623	0.149053	-0.0874443	0.474473	-0.0782592	-0.0424471
140	20.7367	21.4335	38.2577	32.69	96.3709	14.0864				-0.154534	0.089517	0.0863225	-0.302685	0.099568	0.126678					22.5676	14.3518	48.6324	76.3167	59.5061	15.9594				-0.157198	-0.195492	-0.170814	0.607798	-0.168397	-0.0781444
141	21.1877	15.805	37.1038	42.0395	84.0889	13.3588				-0.136146	-0.196593	0.0535577	-0.10325	-0.0405666	0.0684816					20.3029	18.4637	58.6544	67.9409	63.8533	18.7173				-0.241774	0.0350062	6.17497e-05	0.431341	-0.107645	0.081159
142	23.521	17.555	30.6154	34.7112	90.2511	12.8073				-0.0410134	-0.107637	-0.13068	-0.259571	0.0297426	0.0243708					24.7676	18.3149	45.6691	67.1761	63.5281	14.3113				-0.0750372	0.026665	-0.221339	0.415229	-0.112189	-0.173343
143	22.1064	18.5069	44.0192	46.1337	92.5303	15.2558				-0.0986888	-0.0592492	0.24992	-0.0159159	0.0557477	0.22021					24.2441	15.8524	61.098	67.8752	66.1785	12.6872				-0.0945876	-0.111374	0.0417253	0.429957	-0.0751497	-0.267155
144	22.3445	14.6927	35.1962	49.7082	91.3216	15.4551				-0.0889811	-0.253134	-0.000608407	0.0603322	0.0419567	0.236151					32.0765	22.3911	59.3775	62.4284	52.3521	15.0406				0.197919	0.255162	0.0123907	0.315207	-0.268375	-0.131217
145	17.8291	18.9587	46.5923	42.5653	91.8054	8.0897				-0.273081	-0.0362831	0.322982	-0.0920339	0.0474768	-0.352959					24.9029	19.9902	55.7132	68.9067	62.4523	17.2677				-0.0699843	0.120576	-0.0500859	0.451688	-0.127224	-0.00257361
146	22.7311	18.5092	39	41.7568	86.8561	17.1429				-0.0732188	-0.0591323	0.1074	-0.10928	-0.00899353	0.371147					26.5882	19.0529	52.5784	63.929	81.9315	15.3113				-0.00704564	0.0680346	-0.103534	0.346821	0.145	-0.11558
147	22.4762	20.9335	46.2577	38.9027	96.1552	14.4884				-0.0836115	0.0641008	0.313481	-0.170161	0.0971069	0.158831					28.1147	19.2792	50.4412	62.4271	54.8068	15.5414				0.0499625	0.0807201	-0.139974	0.315179	-0.23407	-0.102289
148	23.4986	13.8509	36.4423	39.9422	99.4076	13.4452				-0.0419267	-0.295925	0.0347744	-0.147988	0.134216	0.0753922					27.7971	16.1205	55.4632	66.8581	60.6137	17.5248				0.0381016	-0.0963449	-0.0543484	0.408529	-0.152918	0.0122771
149	22.0392	13.6697	34.7346		94.6671	12.4817				-0.101429	-0.305136	-0.0137155	-1	0.080128	-0.00167179					26.8441	17.8868	56.0221	71.4875	65.7115	14.0105				0.00251112	0.00266734	-0.0448192	0.506059	-0.0816761	-0.190718
150		11.2179	29.5808		96.1241	10.3488				-1	-0.429767	-0.160057	-1	0.096752	-0.172268					27.4941	20.3776	55.0466	55.1892	66.978	18.1218				0.0267858	0.142292	-0.0614515	0.162695	-0.0639766	0.0467614
																				25.3235	19.1046	49.9412	60.6334	66.533	14.1233				-0.0542767	0.0709327	-0.148499	0.277391	-0.0701956	-0.184202
																				19.2618	15.936	57.5074	61.1669	70.7726	12.2376				-0.280655	-0.106687	-0.0194947	0.28863	-0.0109468	-0.293125
																				19.2265	20.8266	66.9926	62.3509	73.4572	13.5564				-0.281973	0.167462	0.142229	0.313574	0.0265707	-0.216948
																				31.4294	18.9889	62.6667	62.565	69.5795	16.0857				0.173752	0.064447	0.0684718	0.318085	-0.0276205	-0.0708489

## Sheet: E
sucrose concentration(mM)	6.25	12.5	25	50	100	200	400	800
w/elav fed	0/10	0/10	0/10	0/10	0/10	1/10	3/10	7/10
	0/10	0/10	0/10	0/10	0/10	1/10	3/10	6/10
	0/10	0/10	0/10	0/10	0/10	1/10	2/10	7/10
	0/10	0/10	0/10	0/10	0/10	2/10	3/10	7/10
PK2-R1i/elav fed	0/10	0/10	0/10	0/10	1/10	2/10	6/10	8/10
	0/10	0/10	0/10	0/10	1/10	2/10	5/10	9/10
	0/10	0/10	0/10	0/10	1/10	2/10	5/10	7/10
	0/10	0/10	0/10	0/10	1/10	3/10	6/10	7/10
PK2-R1i/w fed	0/10	0/10	0/10	0/10	0/10	1/10	4/10	6/10
	0/10	0/10	0/10	0/10	0/10	3/10	3/10	6/10
	0/10	0/10	0/10	0/10	0/10	0/10	2/10	7/10
	0/10	0/10	0/10	0/10	0/10	1/10	2/10	6/10
	6.25	12.5	25	50	100	200	400	800			Bonferroni's multiple comparisons test	95% confidence interval	P Value	F (DFn, DFd)		Bonferroni's multiple comparisons test	95% confidence interval	P Value	F (DFn, DFd)
w/elav fed	0	0	0	0	0	0.1	0.3	0.7			PK2-R1i/elav fed vs. +/elav fed	0.04575 to 0.09800	<0.0001	F (14, 72) = 6.207		Row 1			F (14, 72) = 6.207
	0	0	0	0	0	0.1	0.3	0.6			PK2-R1i/elav fed vs. PK2-R1i/+ fed	0.05200 to 0.1042	<0.0001			PK2-R1i/elav fed vs. +/elav fed	-0.07389 to 0.07389	>0.9999
	0	0	0	0	0	0.1	0.2	0.7								PK2-R1i/elav fed vs. PK2-R1i/+ fed	-0.07389 to 0.07389	>0.9999
	0	0	0	0	0	0.2	0.3	0.7								Row 2
																PK2-R1i/elav fed vs. +/elav fed	-0.07389 to 0.07389	>0.9999
																PK2-R1i/elav fed vs. PK2-R1i/+ fed	-0.07389 to 0.07389	>0.9999
																Row 3
PK2-R1i/elav fed	0	0	0	0	0.1	0.2	0.6	0.8								PK2-R1i/elav fed vs. +/elav fed	-0.07389 to 0.07389	>0.9999
	0	0	0	0	0.1	0.2	0.5	0.9								PK2-R1i/elav fed vs. PK2-R1i/+ fed	-0.07389 to 0.07389	>0.9999
	0	0	0	0	0.1	0.2	0.5	0.7								Row 4
	0	0	0	0	0.1	0.3	0.6	0.7								PK2-R1i/elav fed vs. +/elav fed	-0.07389 to 0.07389	>0.9999
																PK2-R1i/elav fed vs. PK2-R1i/+ fed	-0.07389 to 0.07389	>0.9999
																Row 5
																PK2-R1i/elav fed vs. +/elav fed	0.02611 to 0.1739	0.0055
PK2-R1i/w fed	0	0	0	0	0	0.1	0.4	0.6								PK2-R1i/elav fed vs. PK2-R1i/+ fed	0.02611 to 0.1739	0.0055
	0	0	0	0	0	0.3	0.3	0.6								Row 6
	0	0	0	0	0	0	0.2	0.7								PK2-R1i/elav fed vs. +/elav fed	0.02611 to 0.1739	0.0055
	0	0	0	0	0	0.1	0.2	0.6								PK2-R1i/elav fed vs. PK2-R1i/+ fed	0.02611 to 0.1739	0.0055
																Row 7
																PK2-R1i/elav fed vs. +/elav fed	0.2011 to 0.3489	<0.0001
																PK2-R1i/elav fed vs. PK2-R1i/+ fed	0.2011 to 0.3489	<0.0001
																Row 8
																PK2-R1i/elav fed vs. +/elav fed	0.02611 to 0.1739	0.0055
																PK2-R1i/elav fed vs. PK2-R1i/+ fed	0.07611 to 0.2239	<0.0001
	6.25	12.5	25	50	100	200	400	800
w/elav ST	0/10	0/10	1/10	1/10	3/10	7/10	9/10	10/10
	0/10	0/10	1/10	2/10	2/10	5/10	8/10	10/10
	0/10	0/10	0/10	0/10	2/10	6/10	10/10	10/10
	0/10	0/10	0/10	1/10	2/10	5/10	9/10	10/10
PK2-R1i/elav ST	0/10	0/10	1/10	2/10	6/10	7/10	10/10	10/10
	0/10	0/10	2/10	3/10	6/10	9/10	10/10	10/10
	0/10	0/10	1/10	3/10	5/10	8/10	10/10	10/10
	0/10	1/10	1/10	2/10	6/10	7/10	8/10	10/10
PK2-R1i/w ST	0/10	0/10	0/10	1/10	3/10	6/10	10/10	10/10
	0/10	0/10	0/10	1/10	3/10	5/10	9/10	10/10
	0/10	0/10	1/10	2/10	5/10	7/10	10/10	10/10
	0/10	0/10	0/10	1/10	4/10	6/10	8/10	10/10
	6.25	12.5	25	50	100	200	400	800			Bonferroni's multiple comparisons test	95% confidence interval	P Value	F (DFn, DFd)			Bonferroni's multiple comparisons test	95% confidence interval	P Value	F (DFn, DFd)
w/elav ST	0	0	0.1	0.1	0.3	0.7	0.9	1			PK2-R1i/elav ST vs. +/elav ST	0.07153 to 0.1410	<0.0001	F (14, 72) = 4.350			Row 1			F (14, 72) = 4.350
	0	0	0.1	0.2	0.2	0.5	0.8	1			PK2-R1i/elav ST vs. PK2-R1i/+ ST	0.04653 to 0.1160	<0.0001				PK2-R1i/elav ST vs. +/elav ST	-0.09821 to 0.09821	>0.9999
	0	0	0	0	0.2	0.6	1	1									PK2-R1i/elav ST vs. PK2-R1i/+ ST	-0.09821 to 0.09821	>0.9999
	0	0	0	0.1	0.2	0.5	0.9	1									Row 2
																	PK2-R1i/elav ST vs. +/elav ST	-0.07321 to 0.1232	>0.9999
																	PK2-R1i/elav ST vs. PK2-R1i/+ ST	-0.07321 to 0.1232	>0.9999
																	Row 3
PK2-R1i/elav ST	0	0	0.1	0.2	0.6	0.7	1	1									PK2-R1i/elav ST vs. +/elav ST	-0.02321 to 0.1732	0.1693
	0	0	0.2	0.3	0.6	0.9	1	1									PK2-R1i/elav ST vs. PK2-R1i/+ ST	0.001795 to 0.1982	0.0451
	0	0	0.1	0.3	0.5	0.8	1	1									Row 4
	0	0.1	0.1	0.2	0.6	0.7	0.8	1									PK2-R1i/elav ST vs. +/elav ST	0.05179 to 0.2482	0.0016
																	PK2-R1i/elav ST vs. PK2-R1i/+ ST	0.02679 to 0.2232	0.0095
																	Row 5
																	PK2-R1i/elav ST vs. +/elav ST	0.2518 to 0.4482	<0.0001
PK2-R1i/w ST	0	0	0	0.1	0.3	0.6	1	1									PK2-R1i/elav ST vs. PK2-R1i/+ ST	0.1018 to 0.2982	<0.0001
	0	0	0	0.1	0.3	0.5	0.9	1									Row 6
	0	0	0.1	0.2	0.5	0.7	1	1									PK2-R1i/elav ST vs. +/elav ST	0.1018 to 0.2982	<0.0001
	0	0	0	0.1	0.4	0.6	0.8	1									PK2-R1i/elav ST vs. PK2-R1i/+ ST	0.07679 to 0.2732	0.0002
																	Row 7
																	PK2-R1i/elav ST vs. +/elav ST	-0.04821 to 0.1482	0.4953
																	PK2-R1i/elav ST vs. PK2-R1i/+ ST	-0.07321 to 0.1232	>0.9999
																	Row 8
																	PK2-R1i/elav ST vs. +/elav ST	-0.09821 to 0.09821	>0.9999
																	PK2-R1i/elav ST vs. PK2-R1i/+ ST	-0.09821 to 0.09821	>0.9999

## Sheet: F
		6.25	12.5	25	50	100	200	400	800
	w/elav fed	0/10	0/10	0/10	0/10	0/10	1/10	3/10	7/10
		0/10	0/10	0/10	0/10	0/10	1/10	3/10	6/10
		0/10	0/10	0/10	0/10	0/10	1/10	2/10	7/10
		0/10	0/10	0/10	0/10	0/10	2/10	3/10	7/10
	PK2-R2i/elav fed	0/10	0/10	0/10	0/10	0/10	0/10	3/10	7/10
		0/10	0/10	0/10	0/10	1/10	2/10	4/10	7/10
		0/10	0/10	0/10	0/10	0/10	1/10	3/10	7/10
		0/10	0/10	0/10	0/10	1/10	1/10	3/10	6/10
	PK2-R2i/w fed	0/10	0/10	0/10	0/10	0/10	1/10	2/10	4/10
		0/10	0/10	0/10	0/10	0/10	1/10	2/10	7/10
		0/10	0/10	0/10	0/10	1/10	2/10	4/10	6/10
		0/10	0/10	0/10	0/10	0/10	1/10	3/10	7/10
		6.25	12.5	25	50	100	200	400	800			Bonferroni's multiple comparisons test	95% confidence interval	P Value	F (DFn, DFd)			Bonferroni's multiple comparisons test	95% confidence interval	P Value	F (DFn, DFd)
	w/elav fed	0	0	0	0	0	0.1	0.3	0.7			PK2-R2i/elav fed vs. +/elav fed	-0.01843 to 0.03718	0.8856	F (14, 72) = 0.7374			Row 1			F (14, 72) = 0.7374
		0	0	0	0	0	0.1	0.3	0.6			PK2-R2i/elav fed vs. PK2-R2i/+ fed	-0.01218 to 0.04343	0.405				PK2-R2i/elav fed vs. +/elav fed	-0.07866 to 0.07866	>0.9999
		0	0	0	0	0	0.1	0.2	0.7									PK2-R2i/elav fed vs. PK2-R2i/+ fed	-0.07866 to 0.07866	>0.9999
		0	0	0	0	0	0.2	0.3	0.7									Row 2
																		PK2-R2i/elav fed vs. +/elav fed	-0.07866 to 0.07866	>0.9999
																		PK2-R2i/elav fed vs. PK2-R2i/+ fed	-0.07866 to 0.07866	>0.9999
																		Row 3
	PK2-R2i/elav fed	0	0	0	0	0	0	0.3	0.7									PK2-R2i/elav fed vs. +/elav fed	-0.07866 to 0.07866	>0.9999
		0	0	0	0	0.1	0.2	0.4	0.7									PK2-R2i/elav fed vs. PK2-R2i/+ fed	-0.07866 to 0.07866	>0.9999
		0	0	0	0	0	0.1	0.3	0.7									Row 4
		0	0	0	0	0.1	0.1	0.3	0.6									PK2-R2i/elav fed vs. +/elav fed	-0.07866 to 0.07866	>0.9999
																		PK2-R2i/elav fed vs. PK2-R2i/+ fed	-0.07866 to 0.07866	>0.9999
																		Row 5
																		PK2-R2i/elav fed vs. +/elav fed	-0.02866 to 0.1287	0.2999
	PK2-R2i/w fed	0	0	0	0	0	0.1	0.2	0.4									PK2-R2i/elav fed vs. PK2-R2i/+ fed	-0.05366 to 0.1037	0.9384
		0	0	0	0	0	0.1	0.2	0.7									Row 6
		0	0	0	0	0.1	0.2	0.4	0.6									PK2-R2i/elav fed vs. +/elav fed	-0.1037 to 0.05366	0.9384
		0	0	0	0	0	0.1	0.3	0.7									PK2-R2i/elav fed vs. PK2-R2i/+ fed	-0.1037 to 0.05366	0.9384
																		Row 7
																		PK2-R2i/elav fed vs. +/elav fed	-0.02866 to 0.1287	0.2999
																		PK2-R2i/elav fed vs. PK2-R2i/+ fed	-0.02866 to 0.1287	0.2999
																		Row 8
																		PK2-R2i/elav fed vs. +/elav fed	-0.07866 to 0.07866	>0.9999
																		PK2-R2i/elav fed vs. PK2-R2i/+ fed	-0.003657 to 0.1537	0.0646
		6.25	12.5	25	50	100	200	400	800
	w/elav ST	0/10	0/10	1/10	1/10	3/10	7/10	9/10	10/10
		0/10	0/10	1/10	2/10	2/10	5/10	8/10	10/10
		0/10	0/10	0/10	0/10	2/10	6/10	10/10	10/10
		0/10	0/10	0/10	1/10	2/10	5/10	9/10	10/10
	PK2-R2i/elav ST	0/10	0/10	0/10	0/10	1/10	2/10	6/10	10/10
		0/10	0/10	0/10	1/10	1/10	5/10	9/10	10/10
		0/10	0/10	0/10	0/10	2/10	4/10	9/10	10/10
		0/10	0/10	0/10	1/10	2/10	5/10	8/10	10/10
	PK2-R2i/w ST	0/10	0/10	0/10	1/10	3/10	7/10	9/10	10/10
		0/10	0/10	1/10	1/10	2/10	7/10	9/10	10/10
		0/10	0/10	1/10	1/10	2/10	5/10	8/10	10/10
		0/10	0/10	0/10	0/10	1/10	6/10	9/10	10/10
		6.25	12.5	25	50	100	200	400	800			Bonferroni's multiple comparisons test	95% confidence interval	P Value	F (DFn, DFd)			Bonferroni's multiple comparisons test	95% confidence interval	P Value	F (DFn, DFd)
	w/elav ST	0	0	0.1	0.1	0.3	0.7	0.9	1			PK2-R2i/elav ST vs. +/elav ST	-0.09304 to -0.01946	0.0016	F (14, 72) = 1.603			Row 1			F (14, 72) = 1.603
		0	0	0.1	0.2	0.2	0.5	0.8	1			PK2-R2i/elav ST vs. PK2-R2i/+ ST	-0.08991 to -0.01634	0.003				PK2-R2i/elav ST vs. +/elav ST	-0.1041 to 0.1041	>0.9999
		0	0	0	0	0.2	0.6	1	1									PK2-R2i/elav ST vs. PK2-R2i/+ ST	-0.1041 to 0.1041	>0.9999
		0	0	0	0.1	0.2	0.5	0.9	1									Row 2
																		PK2-R2i/elav ST vs. +/elav ST	-0.1041 to 0.1041	>0.9999
																		PK2-R2i/elav ST vs. PK2-R2i/+ ST	-0.1041 to 0.1041	>0.9999
																		Row 3
	PK2-R2i/elav ST	0	0	0	0	0.1	0.2	0.6	1									PK2-R2i/elav ST vs. +/elav ST	-0.1541 to 0.05405	0.55
		0	0	0	0.1	0.1	0.5	0.9	1									PK2-R2i/elav ST vs. PK2-R2i/+ ST	-0.1541 to 0.05405	0.55
		0	0	0	0	0.2	0.4	0.9	1									Row 4
		0	0	0	0.1	0.2	0.5	0.8	1									PK2-R2i/elav ST vs. +/elav ST	-0.1541 to 0.05405	0.55
																		PK2-R2i/elav ST vs. PK2-R2i/+ ST	-0.1291 to 0.07905	>0.9999
																		Row 5
																		PK2-R2i/elav ST vs. +/elav ST	-0.1791 to 0.02905	0.2066
	PK2-R2i/w ST	0	0	0	0.1	0.3	0.7	0.9	1									PK2-R2i/elav ST vs. PK2-R2i/+ ST	-0.1541 to 0.05405	0.55
		0	0	0.1	0.1	0.2	0.7	0.9	1									Row 6
		0	0	0.1	0.1	0.2	0.5	0.8	1									PK2-R2i/elav ST vs. +/elav ST	-0.2791 to -0.07095	0.0005
		0	0	0	0	0.1	0.6	0.9	1									PK2-R2i/elav ST vs. PK2-R2i/+ ST	-0.3291 to -0.1209	<0.0001
																		Row 7
																		PK2-R2i/elav ST vs. +/elav ST	-0.2041 to 0.004053	0.062
																		PK2-R2i/elav ST vs. PK2-R2i/+ ST	-0.1791 to 0.02905	0.2066
																		Row 8
																		PK2-R2i/elav ST vs. +/elav ST	-0.1041 to 0.1041	>0.9999
																		PK2-R2i/elav ST vs. PK2-R2i/+ ST	-0.1041 to 0.1041	>0.9999
