# Supplementary material for: Hugin-AstA circuitry is a novel central energy sensor that directly regulates sweet sensation in Drosophila and mouse
Source: eLife. 2026 May 5;14:RP108551. doi: 10.7554/eLife.108551 (PMC13143273; doi:10.7554/eLife.108551)
Supplement: Figure 4—figure supplement 1—source data 1. [file elife-108551-fig4-figsupp1-data1.xlsx]

## Sheet: A
w/hugin fed 30℃	0/10	0/10	0/10	0/10	0/10	1/10	1/10	4/10			w/hugin fed 30℃	0	0	0	0	0	0.1	0.1	0.4		Bonferroni's multiple comparisons test	95% confidence interval	P value	F (DFn, DFd)		Bonferroni's multiple comparisons test	95% confidence interval	P value	F (DFn, DFd)
	0/10	0/10	0/10	0/10	0/10	0/10	3/10	5/10				0	0	0	0	0	0	0.3	0.5		TRPA1/hugin fed 30℃ vs. w/hugin fed 30℃	-0.06093 to -0.007821	0.0082	F (14, 72) = 4.514		Row 1			F (14, 72) = 4.514
	0/10	0/10	0/10	0/10	0/10	0/10	1/10	4/10				0	0	0	0	0	0	0.1	0.4		TRPA1/hugin fed 30℃ vs. TRPA1/w1118 fed 30℃	-0.07030 to -0.01720	0.0007			TRPA1/hugin fed 30℃ vs. w/hugin fed 30℃	-0.07511 to 0.07511	>0.9999
	0/10	0/10	0/10	0/10	0/10	1/10	1/10	3/10				0	0	0	0	0	0.1	0.1	0.3							TRPA1/hugin fed 30℃ vs. TRPA1/w1118 fed 30℃	-0.07511 to 0.07511	>0.9999
																										Row 2
											mean	0	0	0	0	0	0.05	0.15	0.4							TRPA1/hugin fed 30℃ vs. w/hugin fed 30℃	-0.07511 to 0.07511	>0.9999
											SEM	0	0	0	0	0	0.0288675	0.05	0.0408248							TRPA1/hugin fed 30℃ vs. TRPA1/w1118 fed 30℃	-0.07511 to 0.07511	>0.9999
																										Row 3
TRPA1/hugin fed 30℃	0/10	0/10	0/10	0/10	0/10	0/10	1/10	2/10			TRPA1/hugin fed 30℃	0	0	0	0	0	0	0.1	0.2							TRPA1/hugin fed 30℃ vs. w/hugin fed 30℃	-0.07511 to 0.07511	>0.9999
	0/10	0/10	0/10	0/10	0/10	1/10	2/10	3/10				0	0	0	0	0	0.1	0.2	0.3							TRPA1/hugin fed 30℃ vs. TRPA1/w1118 fed 30℃	-0.07511 to 0.07511	>0.9999
	0/10	0/10	0/10	0/10	0/10	0/10	1/10	1/10				0	0	0	0	0	0	0.1	0.1							Row 4
	0/10	0/10	0/10	0/10	0/10	0/10	0/10	2/10				0	0	0	0	0	0	0	0.2							TRPA1/hugin fed 30℃ vs. w/hugin fed 30℃	-0.07511 to 0.07511	>0.9999
																										TRPA1/hugin fed 30℃ vs. TRPA1/w1118 fed 30℃	-0.07511 to 0.07511	>0.9999
											mean	0	0	0	0	0	0.025	0.1	0.2							Row 5
											SEM	0	0	0	0	0	0.025	0.0408248	0.0408248							TRPA1/hugin fed 30℃ vs. w/hugin fed 30℃	-0.07511 to 0.07511	>0.9999
																										TRPA1/hugin fed 30℃ vs. TRPA1/w1118 fed 30℃	-0.07511 to 0.07511	>0.9999
																										Row 6
TRPA1/w1118 fed 30℃	0/10	0/10	0/10	0/10	0/10	0/10	2/10	5/10			TRPA1/w1118 fed 30℃	0	0	0	0	0	0	0.2	0.5							TRPA1/hugin fed 30℃ vs. w/hugin fed 30℃	-0.1001 to 0.05011	0.8971
	0/10	0/10	0/10	0/10	0/10	1/10	2/10	6/10				0	0	0	0	0	0.1	0.2	0.6							TRPA1/hugin fed 30℃ vs. TRPA1/w1118 fed 30℃	-0.1001 to 0.05011	0.8971
	0/10	0/10	0/10	0/10	0/10	1/10	1/10	4/10				0	0	0	0	0	0.1	0.1	0.4							Row 7
	0/10	0/10	0/10	0/10	0/10	0/10	1/10	4/10				0	0	0	0	0	0	0.1	0.4							TRPA1/hugin fed 30℃ vs. w/hugin fed 30℃	-0.1251 to 0.02511	0.2638
																										TRPA1/hugin fed 30℃ vs. TRPA1/w1118 fed 30℃	-0.1251 to 0.02511	0.2638
											mean	0	0	0	0	0	0.05	0.15	0.475							Row 8
											SEM	0	0	0	0	0	0.0288675	0.0288675	0.0478714							TRPA1/hugin fed 30℃ vs. w/hugin fed 30℃	-0.2751 to -0.1249	<0.0001
																										TRPA1/hugin fed 30℃ vs. TRPA1/w1118 fed 30℃	-0.3501 to -0.1999	<0.0001
w/hugin fed 20℃	0/10	0/10	0/10	0/10	0/10	0/10	2/10	4/10			w/hugin fed 20℃	0	0	0	0	0	0	0.2	0.4
	0/10	0/10	0/10	0/10	0/10	1/10	1/10	3/10				0	0	0	0	0	0.1	0.1	0.3
	0/10	0/10	0/10	0/10	0/10	0/10	2/10	5/10				0	0	0	0	0	0	0.2	0.5
	0/10	0/10	0/10	0/10	0/10	1/10	1/10	3/10				0	0	0	0	0	0.1	0.1	0.3
											mean	0	0	0	0	0	0.05	0.15	0.375
											SEM	0	0	0	0	0	0.0288675	0.0288675	0.0478714		Bonferroni's multiple comparisons test	95% confidence interval	P value	F (DFn, DFd)		Bonferroni's multiple comparisons test	95% confidence interval	P value	F (DFn, DFd)
																					TRPA1/hugin fed 20℃ vs. w/hugin fed 20℃	-0.02367 to 0.04242	>0.9999	F (14, 72) = 0.2723		Row 1			F (14, 72) = 0.2723
TRPA1/hugin fed 20℃	0/10	0/10	0/10	0/10	0/10	1/10	1/10	4/10			TRPA1/hugin fed 20℃	0	0	0	0	0	0.1	0.1	0.4		TRPA1/hugin fed 20℃ vs. TRPA1/w1118 fed 20℃	-0.04242 to 0.02367	>0.9999			TRPA1/hugin fed 20℃ vs. w/hugin fed 20℃	-0.09346 to 0.09346	>0.9999
	0/10	0/10	0/10	0/10	0/10	1/10	3/10	5/10				0	0	0	0	0	0.1	0.3	0.5							TRPA1/hugin fed 20℃ vs. TRPA1/w1118 fed 20℃	-0.09346 to 0.09346	>0.9999
	0/10	0/10	0/10	0/10	0/10	1/10	2/10	4/10				0	0	0	0	0	0.1	0.2	0.4							Row 2
	0/10	0/10	0/10	0/10	0/10	0/10	1/10	3/10				0	0	0	0	0	0	0.1	0.3							TRPA1/hugin fed 20℃ vs. w/hugin fed 20℃	-0.09346 to 0.09346	>0.9999
																										TRPA1/hugin fed 20℃ vs. TRPA1/w1118 fed 20℃	-0.09346 to 0.09346	>0.9999
											mean	0	0	0	0	0	0.075	0.175	0.4							Row 3
											SEM	0	0	0	0	0	0.025	0.0478714	0.0408248							TRPA1/hugin fed 20℃ vs. w/hugin fed 20℃	-0.09346 to 0.09346	>0.9999
																										TRPA1/hugin fed 20℃ vs. TRPA1/w1118 fed 20℃	-0.09346 to 0.09346	>0.9999
																										Row 4
TRPA1/w1118 fed 20℃	0/10	0/10	0/10	0/10	0/10	1/10	1/10	6/10			TRPA1/w1118 fed 20℃	0	0	0	0	0	0.1	0.1	0.6							TRPA1/hugin fed 20℃ vs. w/hugin fed 20℃	-0.09346 to 0.09346	>0.9999
	0/10	0/10	0/10	0/10	0/10	0/10	1/10	3/10				0	0	0	0	0	0	0.1	0.3							TRPA1/hugin fed 20℃ vs. TRPA1/w1118 fed 20℃	-0.09346 to 0.09346	>0.9999
	0/10	0/10	0/10	0/10	0/10	2/10	4/10	5/10				0	0	0	0	0	0.2	0.4	0.5							Row 5
	0/10	0/10	0/10	0/10	0/10	0/10	2/10	4/10				0	0	0	0	0	0	0.2	0.4							TRPA1/hugin fed 20℃ vs. w/hugin fed 20℃	-0.09346 to 0.09346	>0.9999
																										TRPA1/hugin fed 20℃ vs. TRPA1/w1118 fed 20℃	-0.09346 to 0.09346	>0.9999
											mean	0	0	0	0	0	0.075	0.2	0.45							Row 6
											SEM	0	0	0	0	0	0.0478714	0.0707107	0.0645497							TRPA1/hugin fed 20℃ vs. w/hugin fed 20℃	-0.06846 to 0.1185	>0.9999
																										TRPA1/hugin fed 20℃ vs. TRPA1/w1118 fed 20℃	-0.09346 to 0.09346	>0.9999
																										Row 7
																										TRPA1/hugin fed 20℃ vs. w/hugin fed 20℃	-0.06846 to 0.1185	>0.9999
																										TRPA1/hugin fed 20℃ vs. TRPA1/w1118 fed 20℃	-0.1185 to 0.06846	>0.9999
																										Row 8
																										TRPA1/hugin fed 20℃ vs. w/hugin fed 20℃	-0.06846 to 0.1185	>0.9999
																										TRPA1/hugin fed 20℃ vs. TRPA1/w1118 fed 20℃	-0.1435 to 0.04346	0.4493

## Sheet: B
	6.25	12.5	25	50	100	200	400	800				6.25	12.5	25	50	100	200	400	800
w/hugin ST 30℃	0/10	0/10	0/10	1/10	2/10	6/10	9/10	10/10			w/hugin ST 30℃	0	0	0	0.1	0.2	0.6	0.9	1			Bonferroni's multiple comparisons test	95% confidence interval	P value	F (DFn, DFd)			Bonferroni's multiple comparisons test	95% confidence interval	P value	F (DFn, DFd)
	0/10	0/10	0/10	1/10	1/10	4/10	7/10	10/10				0	0	0	0.1	0.1	0.4	0.7	1			TRPA1/hugin ST 30℃ vs. w/hugin ST 30℃	-0.1129 to -0.03715	<0.0001	F (14, 72) = 4.816			Row 1			F (14, 72) = 4.816
	0/10	0/10	0/10	0/10	2/10	5/10	7/10	10/10				0	0	0	0	0.2	0.5	0.7	1			TRPA1/hugin ST 30℃ vs. TRPA1/w1118 ST 30℃	-0.1629 to -0.08715	<0.0001				TRPA1/hugin ST 30℃ vs. w/hugin ST 30℃	-0.1071 to 0.1071	>0.9999
	0/10	0/10	0/10	0/10	1/10	4/10	8/10	10/10				0	0	0	0	0.1	0.4	0.8	1									TRPA1/hugin ST 30℃ vs. TRPA1/w1118 ST 30℃	-0.1071 to 0.1071	>0.9999
																												Row 2
											mean	0	0	0	0.05	0.15	0.475	0.775	1									TRPA1/hugin ST 30℃ vs. w/hugin ST 30℃	-0.1071 to 0.1071	>0.9999
											SEM	0	0	0	0.0288675	0.0288675	0.0478714	0.0478714	0									TRPA1/hugin ST 30℃ vs. TRPA1/w1118 ST 30℃	-0.1071 to 0.1071	>0.9999
																												Row 3
TRPA1/hugin ST 30℃	0/10	0/10	0/10	0/10	2/10	3/10	5/10	10/10			TRPA1/hugin ST 30℃	0	0	0	0	0.2	0.3	0.5	1									TRPA1/hugin ST 30℃ vs. w/hugin ST 30℃	-0.1071 to 0.1071	>0.9999
	0/10	0/10	0/10	0/10	0/10	0/10	5/10	10/10				0	0	0	0	0	0	0.5	1									TRPA1/hugin ST 30℃ vs. TRPA1/w1118 ST 30℃	-0.1321 to 0.08207	>0.9999
	0/10	0/10	0/10	0/10	1/10	2/10	6/10	9/10				0	0	0	0	0.1	0.2	0.6	0.9									Row 4
	0/10	0/10	0/10	0/10	1/10	3/10	7/10	10/10				0	0	0	0	0.1	0.3	0.7	1									TRPA1/hugin ST 30℃ vs. w/hugin ST 30℃	-0.1571 to 0.05707	0.5772
																												TRPA1/hugin ST 30℃ vs. TRPA1/w1118 ST 30℃	-0.2571 to -0.04293	0.004
											mean	0	0	0	0	0.1	0.2	0.575	0.975									Row 5
											SEM	0	0	0	0	0.0408248	0.0707107	0.0478714	0.025									TRPA1/hugin ST 30℃ vs. w/hugin ST 30℃	-0.1571 to 0.05707	0.5772
																												TRPA1/hugin ST 30℃ vs. TRPA1/w1118 ST 30℃	-0.2821 to -0.06793	0.0007
																												Row 6
TRPA1/w1118 ST 30℃	0/10	0/10	0/10	1/10	3/10	5/10	9/10	10/10			TRPA1/w1118 ST 30℃	0	0	0	0.1	0.3	0.5	0.9	1									TRPA1/hugin ST 30℃ vs. w/hugin ST 30℃	-0.3821 to -0.1679	<0.0001
	0/10	0/10	0/10	1/10	2/10	4/10	7/10	10/10				0	0	0	0.1	0.2	0.4	0.7	1									TRPA1/hugin ST 30℃ vs. TRPA1/w1118 ST 30℃	-0.4571 to -0.2429	<0.0001
	0/10	0/10	0/10	2/10	2/10	6/10	9/10	10/10				0	0	0	0.2	0.2	0.6	0.9	1									Row 7
	0/10	0/10	1/10	2/10	4/10	7/10	9/10	10/10				0	0	0.1	0.2	0.4	0.7	0.9	1									TRPA1/hugin ST 30℃ vs. w/hugin ST 30℃	-0.3071 to -0.09293	0.0001
																												TRPA1/hugin ST 30℃ vs. TRPA1/w1118 ST 30℃	-0.3821 to -0.1679	<0.0001
											mean	0	0	0.025	0.15	0.275	0.55	0.85	1									Row 8
											SEM	0	0	0.025	0.0288675	0.0478714	0.0645497	0.05	0									TRPA1/hugin ST 30℃ vs. w/hugin ST 30℃	-0.1321 to 0.08207	>0.9999
																												TRPA1/hugin ST 30℃ vs. TRPA1/w1118 ST 30℃	-0.1321 to 0.08207	>0.9999
w/hugin ST 20℃	0/10	0/10	0/10	1/10	2/10	4/10	6/10	8/10			w/hugin ST 20℃	0	0	0	0.1	0.2	0.4	0.6	0.8
	0/10	0/10	0/10	1/10	1/10	3/10	6/10	9/10				0	0	0	0.1	0.1	0.3	0.6	0.9
	0/10	0/10	0/10	2/10	4/10	6/10	8/10	10/10				0	0	0	0.2	0.4	0.6	0.8	1
	0/10	0/10	0/10	1/10	3/10	5/10	7/10	9/10				0	0	0	0.1	0.3	0.5	0.7	0.9
																					Bonferroni's multiple comparisons test	95% confidence interval	P value	F (DFn, DFd)		Bonferroni's multiple comparisons test	95% confidence interval	P value	F (DFn, DFd)
											mean	0	0	0	0.125	0.25	0.45	0.675	0.9		TRPA1/hugin ST 20℃ vs. w/hugin ST 20℃	-0.08695 to 0.01195	0.1737	F (14, 72) = 0.3887		Row 1			F (14, 72) = 0.3887
											SEM	0	0	0	0.025	0.0645497	0.0645497	0.0478714	0.0408248		TRPA1/hugin ST 20℃ vs. TRPA1/w1118 ST 20℃	-0.07757 to 0.02132	0.3941			TRPA1/hugin ST 20℃ vs. w/hugin ST 20℃	-0.1399 to 0.1399	>0.9999
																										TRPA1/hugin ST 20℃ vs. TRPA1/w1118 ST 20℃	-0.1399 to 0.1399	>0.9999
TRPA1/hugin ST 20℃	0/10	0/10	0/10	1/10	1/10	6/10	8/10	10/10			TRPA1/hugin ST 20℃	0	0	0	0.1	0.1	0.6	0.8	1							Row 2
	0/10	0/10	0/10	0/10	2/10	3/10	6/10	10/10				0	0	0	0	0.2	0.3	0.6	1							TRPA1/hugin ST 20℃ vs. w/hugin ST 20℃	-0.1399 to 0.1399	>0.9999
	0/10	0/10	0/10	0/10	2/10	4/10	6/10	8/10				0	0	0	0	0.2	0.4	0.6	0.8							TRPA1/hugin ST 20℃ vs. TRPA1/w1118 ST 20℃	-0.1399 to 0.1399	>0.9999
	0/10	0/10	0/10	0/10	1/10	3/10	5/10	8/10				0	0	0	0	0.1	0.3	0.5	0.8							Row 3
																										TRPA1/hugin ST 20℃ vs. w/hugin ST 20℃	-0.1399 to 0.1399	>0.9999
											mean	0	0	0	0.025	0.15	0.4	0.625	0.9							TRPA1/hugin ST 20℃ vs. TRPA1/w1118 ST 20℃	-0.1399 to 0.1399	>0.9999
											SEM	0	0	0	0.025	0.0288675	0.0707107	0.0629153	0.057735							Row 4
																										TRPA1/hugin ST 20℃ vs. w/hugin ST 20℃	-0.2399 to 0.03986	0.2121
																										TRPA1/hugin ST 20℃ vs. TRPA1/w1118 ST 20℃	-0.1899 to 0.08986	0.8317
TRPA1/w1118 ST 20℃	0/10	0/10	0/10	0/10	2/10	3/10	7/10	9/10			TRPA1/w1118 ST 20℃	0	0	0	0	0.2	0.3	0.7	0.9							Row 5
	0/10	0/10	0/10	0/10	1/10	2/10	6/10	8/10				0	0	0	0	0.1	0.2	0.6	0.8							TRPA1/hugin ST 20℃ vs. w/hugin ST 20℃	-0.2399 to 0.03986	0.2121
	0/10	0/10	0/10	2/10	4/10	6/10	8/10	10/10				0	0	0	0.2	0.4	0.6	0.8	1							TRPA1/hugin ST 20℃ vs. TRPA1/w1118 ST 20℃	-0.2399 to 0.03986	0.2121
	0/10	0/10	0/10	1/10	3/10	5/10	7/10	9/10				0	0	0	0.1	0.3	0.5	0.7	0.9							Row 6
																										TRPA1/hugin ST 20℃ vs. w/hugin ST 20℃	-0.1899 to 0.08986	0.8317
											mean	0	0	0	0.075	0.25	0.4	0.7	0.9							TRPA1/hugin ST 20℃ vs. TRPA1/w1118 ST 20℃	-0.1399 to 0.1399	>0.9999
											SEM	0	0	0	0.0478714	0.0645497	0.0912871	0.0408248	0.0408248							Row 7
																										TRPA1/hugin ST 20℃ vs. w/hugin ST 20℃	-0.1899 to 0.08986	0.8317
																										TRPA1/hugin ST 20℃ vs. TRPA1/w1118 ST 20℃	-0.2149 to 0.06486	0.4472
																										Row 8
																										TRPA1/hugin ST 20℃ vs. w/hugin ST 20℃	-0.1399 to 0.1399	>0.9999
																										TRPA1/hugin ST 20℃ vs. TRPA1/w1118 ST 20℃	-0.1399 to 0.1399	>0.9999

## Sheet: C
	ASTA/GC6m;hugin/+.nd2	ASTA/GC6m;hugin/+009.nd2	ASTA/GC6m;hugin/+010.nd2	ASTA/GC6m;hugin/+011.nd2	ASTA/GC6m;hugin/+002.nd2	ASTA/GC6m;hugin/+015.nd2				ASTA/GC6m;hugin/+.nd2	ASTA/GC6m;hugin/+009.nd2	ASTA/GC6m;hugin/+010.nd2	ASTA/GC6m;hugin/+011.nd2	ASTA/GC6m;hugin/+002.nd2	ASTA/GC6m;hugin/+015.nd2						ASTA/GC6m;hugin/chrimson.nd2	ASTA/GC6m;hugin/chrimson001.nd2	ASTA/GC6m;hugin/chrimson003.nd2	ASTA/GC6m;hugin/chrimson014.nd2	ASTA/GC6m;hugin/chrimson016.nd2	ASTA/GC6m;hugin/chrimson017.nd2				ASTA/GC6m;hugin/chrimson.nd2	ASTA/GC6m;hugin/chrimson001.nd2	ASTA/GC6m;hugin/chrimson003.nd2	ASTA/GC6m;hugin/chrimson014.nd2	ASTA/GC6m;hugin/chrimson016.nd2	ASTA/GC6m;hugin/chrimson017.nd2							实验组	对照组
time（sec）	raw data	raw data	raw data	raw data	raw data	raw data				F/F0	F/F0	F/F0	F/F0	F/F0	F/F0	mean	SEM				raw data	raw data	raw data	raw data	raw data	raw data				F/F0	F/F0	F/F0	F/F0	F/F0	F/F0	mean	SEM					0.755558	0.23517
0	29.549	806.783	164.841	1255.72	113.836	12.566				0.0329641	0.0713514	-0.0314154	-0.0331923	-0.133814	-0.324313	-0.0697365	0.0583588				210.897	131.223	1475.09	976.961	44.1724	66.817				0.0444564	-0.0436065	0.0768391	-0.093581	-0.20825	0.0255051	-0.0331061	0.0431979					0.778747	0.181245
1	29.7451	829.468	174.298	1247.24	136.982	19.1702				0.0398193	0.101476	0.0241514	-0.0397227	0.0423109	0.0308016	0.0331394	0.0184334				203.691	138.129	1792.23	968.321	46.2069	65.5446				0.00877149	0.00672593	0.308357	-0.101597	-0.171783	0.00597632	0.0094085	0.0669682					0.446786	0.169042
2	30.8601	821.839	154.096	1331.59	120.609	22.7021				0.0787971	0.0913448	-0.0945521	0.0252213	-0.0822751	0.220716	0.0398752	0.0483299				207.035	131.376	1750.02	991.17	53.2828	64.5357				0.025331	-0.0424884	0.277541	-0.0803986	-0.0449538	-0.00950824	0.0209205	0.0533621					0.214582	0.15057
3	26.1137	819.867	176.269	1312.13	119.2	13.4128				-0.087126	0.0887259	0.0357333	0.010239	-0.0929956	-0.27878	-0.0540339	0.0534457				196.581	138.743	1444.2	1017.33	45.931	52.8571				-0.0264444	0.0112002	0.0542863	-0.0561241	-0.176728	-0.188751	-0.0637602	0.0405747					1.04104	0.222562
4	28.0784	895.392	168.856	1212.32	122.36	21.9021				-0.0184447	0.189017	-0.00782676	-0.0666076	-0.0689508	0.177699	0.0341477	0.0482701				207.303	123.015	1482.7	1044.06	46.423	51.4643				0.0266582	-0.103428	0.0823944	-0.0313304	-0.16791	-0.210128	-0.0672905	0.0463169					0.457578	0.633037
5	25.2366	785.741	182.303	1283.01	118.676	14.4553				-0.117787	0.0434093	0.0711865	-0.0121789	-0.0969858	-0.222723	-0.0558466	0.0451933				205.692	134.218	1476.79	1006.33	43.8023	60.3125				0.0186794	-0.021778	0.0780816	-0.0663298	-0.214883	-0.0743258	-0.0467593	0.040784				Nean	0.615715	0.265271
6	22.0484	834.566	169.779	1304.74	122.449	15.8638				-0.229239	0.108246	-0.00240334	0.00455132	-0.0682744	-0.146987	-0.0556845	0.0489749				201.248	136.792	1453.07	1048.74	53.2184	61.5938				-0.00332981	-0.00301564	0.0607632	-0.0269897	-0.0461081	-0.0546604	-0.0122234	0.0169883				TTEST		0.0336914
7	29.3412	676.762	159.793	1326.49	147.444	19.9319				0.0256999	-0.101307	-0.0610768	0.0212919	0.121919	0.071759	0.0130476	0.0337142				205.181	126.495	1425.9	1005.99	44.6437	59.1652				0.0161497	-0.0780642	0.0409286	-0.0666501	-0.199802	-0.0919345	-0.0632287	0.0350513						*
8	32.7882	702.524	150.966	1321.57	128.369	12.0128				0.146199	-0.0670968	-0.112943	0.0175047	-0.0232285	-0.354059	-0.065604	0.0680717				213.739	115.559	1600.49	1037.34	50.6207	67.442				0.0585302	-0.157766	0.168381	-0.0375654	-0.0926696	0.0350976	-0.00433211	0.0475346				SEM	0.0860489	0.0747126
9	28.5634	716.629	169.889	1272.71	124.542	16.3149				-0.00149019	-0.0483665	-0.00175347	-0.020114	-0.0523462	-0.122731	-0.0411335	0.0186193				204.311	127.139	1552.79	1031.21	50.331	68.8348				0.0118376	-0.0733734	0.133563	-0.0432455	-0.0978622	0.0564742	-0.00210109	0.0355775
10	23.1255	687.315	144.707	1254.11	145.324	17.0553				-0.191586	-0.0872943	-0.149724	-0.0344338	0.105788	-0.0829188	-0.0733616	0.0423098				194.502	152.827	1569.18	1027.69	45.9264	53.7634				-0.036737	0.11385	0.145522	-0.0465148	-0.176811	-0.174841	-0.0292553	0.0560797
11	29.885	721.504	169.707	1315.66	124.107	16.3745				0.0447099	-0.041894	-0.00282699	0.0129546	-0.05566	-0.119526	-0.0270405	0.0237538				200.665	130.554	1324.3	1052.83	52.4989	70.4866				-0.00621857	-0.0484773	-0.033243	-0.0231902	-0.0590045	0.081826	-0.0147179	0.0207436
12	28.2471	725.482	169.601	1284.3	131.027	15.7234				-0.0125473	-0.0366102	-0.00344807	-0.0111871	-0.00300505	-0.154536	-0.036889	0.0240559				202.735	118.203	827.284	1031.49	54.8644	69.558				0.00403547	-0.138499	-0.396071	-0.0429941	-0.0166051	0.0675738	-0.0870932	0.0676386
13	29.3935	737.699	150.279	1302.05	135.267	16.3149				0.0275282	-0.0203871	-0.116983	0.00247737	0.0292575	-0.122731	-0.0334729	0.0283201				199.629	125.119	864.043	1039.02	52.5885	84.6652				-0.0113503	-0.0880944	-0.369236	-0.0359998	-0.0573985	0.299439	-0.0437734	0.0869832				P value	0.0337
14	30.8915	774.371	154.173	1244.21	123.631	8.9617				0.0798948	0.0283098	-0.0941003	-0.0420533	-0.0592789	-0.51812	-0.100891	0.0873109				209.076	124.881	785.028	1041.46	53.9264	54.3571				0.0354389	-0.0898261	-0.426918	-0.0337409	-0.0334179	-0.165729	-0.119032	0.0674025				95% confidence interval	-0.6679 to -0.03300
15	33.3229	839.07	164.74	1303.21	131.369	13.8766				0.164891	0.114226	-0.0320083	0.00336864	-0.000401215	-0.253841	-0.000627487	0.0593592				201.829	137.361	815.106	1062.16	52.354	57.6161				-0.000451449	0.0011336	-0.40496	-0.0145363	-0.0616017	-0.11571	-0.0993544	0.0638126				F, DFn, Dfd	2.636, 5, 5
16	29.8078	768.58	147.899	1342.5	129.511	16.4723				0.0420111	0.0206208	-0.130966	0.0336245	-0.0145374	-0.114267	-0.0272524	0.0312437				202.078	138.941	826.269	1075.6	52.3402	64.5759				0.000782206	0.0126433	-0.396811	-0.00206614	-0.0618491	-0.00889126	-0.076032	0.0650238
17	29.8288	875.741	160.577	1313.26	132.062	15.7234				0.0427452	0.162923	-0.0564724	0.0111094	0.00487417	-0.154536	0.00177382	0.0430387				197.348	155.931	849.539	1082.46	55.3747	58.5714				-0.0226449	0.136473	-0.379824	0.00430131	-0.0074584	-0.101048	-0.0617002	0.0709101
18	31.4379	718.895	173.572	1388.37	131.093	17.2511				0.0989956	-0.0453578	0.0198856	0.0689369	-0.00249828	-0.0723904	0.0112619	0.0267649				189.726	111.445	1122.23	1081.15	48.0368	72.8795				-0.0603909	-0.18775	-0.180758	0.00308089	-0.138984	0.118552	-0.0743748	0.0489085
19	25.5124	740.601	165.942	1368.9	120.351	11.8255				-0.108146	-0.0165333	-0.0249461	0.0539442	-0.0842367	-0.364131	-0.0906748	0.0594016				197.589	139.644	1384.03	1039.26	54.0828	75.2455				-0.0214503	0.017767	0.0103611	-0.0357788	-0.0306145	0.154865	0.0158583	0.0291975
20	29.1516	735.147	154.76	1286.82	124.902	15.3234				0.0190719	-0.0237765	-0.0906541	-0.00924493	-0.049607	-0.176045	-0.0550426	0.0285816				190.944	126.292	1202.28	1023.8	66.3333	64.1384				-0.0543608	-0.079543	-0.12232	-0.0501265	0.188965	-0.015606	-0.0221653	0.044632
21	27.2706	776.622	182.51	1288.94	133.262	15.6255				-0.0466835	0.0313	0.0724011	-0.00761492	0.0140051	-0.159801	-0.0160655	0.0329862				196.51	146.812	1078.39	1091.36	65.3747	73.3304				-0.026793	0.0700119	-0.212759	0.0125603	0.171783	0.125473	0.0233791	0.0556827
22	28.8784	779.231	169.346	1281.45	133.378	17.634				0.00952148	0.0347638	-0.00494524	-0.0133789	0.0148847	-0.0518015	-0.00182594	0.0120935				205.514	134.049	969.816	1075.96	57.2943	60.817				0.0177998	-0.0230046	-0.29202	-0.00172935	0.0269487	-0.0665827	-0.0564314	0.0490501
23	31.4758	771.678	176.861	1270.68	119.267	21.3872				0.100321	0.0247346	0.0392083	-0.0216746	-0.092488	0.150012	0.0333521	0.0351504				201.279	128.619	973.504	1080.11	68.6552	72.8973				-0.00317876	-0.0625853	-0.289328	0.00211988	0.230583	0.118825	-0.000594052	0.0718628
24	27.0863	757.28	189.812	1285.15	118.311	24.7915				-0.0531262	0.00561427	0.115312	-0.0105315	-0.0997593	0.333065	0.048429	0.0640504				200.898	138.832	1545.19	1101.81	51.0644	77.0804				-0.00506564	0.0118496	0.128013	0.0222525	-0.0847166	0.183027	0.04256	0.0395206
25	28.8784	784.231	164.264	1307.8	128.058	16.1404				0.00952148	0.0414034	-0.0348052	0.00690612	-0.0255957	-0.132114	-0.0224473	0.0245967				200.172	127.243	1208.23	1074.06	53.4851	57.8393				-0.00865964	-0.0726154	-0.117977	-0.00349662	-0.0413278	-0.112284	-0.0593934	0.0203544
26	30.2784	703.839	157.639	1276.95	130.373	23.634				0.0584622	-0.065351	-0.0737328	-0.0168505	-0.00797683	0.270825	0.0275626	0.0523643				200.895	142.163	1068.24	1125.5	55.2966	61.0804				-0.00507852	0.0361321	-0.220168	0.0442297	-0.00885827	-0.0625401	-0.0360472	0.0399812
27	25.0196	756.559	168.865	1307.44	113.022	18.183				-0.125373	0.00465776	-0.00777036	0.00662518	-0.140003	-0.0222812	-0.0473575	0.0273772				206.159	165.104	1023.24	1080.59	57.4644	57.8795				0.0209902	0.20333	-0.253019	0.00256726	0.0299976	-0.111667	-0.0179668	0.0625144
28	29.4706	746.217	183.856	1267.4	127.431	16.0383				0.0302234	-0.00907649	0.0803112	-0.0241994	-0.0303643	-0.137604	-0.0151183	0.0297303				203.73	142.049	1646.41	1084.28	55.6276	67.2143				0.00896167	0.035302	0.201905	0.0059885	-0.00292539	0.0316028	0.0468057	0.0316178
29	28.9477	756.532	172.029	1312.27	124.782	19.5064				0.011944	0.00462071	0.0108173	0.0103465	-0.0505201	0.0488794	0.00601466	0.0130544				193.965	120.822	1243.38	1114.21	54.6	55.2589				-0.0393995	-0.119412	-0.0923121	0.0337532	-0.0213442	-0.151888	-0.0651005	0.0280295
30	27.8327	702.028	166.76	1246.36	139.244	25.3277				-0.0270338	-0.0677561	-0.0201437	-0.0403955	0.0595242	0.361897	0.0443486	0.065846				202.087	135.049	1153.06	1117.76	54.9172	57.3348				0.000823807	-0.0157163	-0.158252	0.0370558	-0.0156587	-0.120027	-0.0452957	0.0310944
31	26.6039	727.692	171.462	1217.36	126.04	16.7532				-0.0699897	-0.0336757	0.00748397	-0.0627268	-0.0409493	-0.099163	-0.0498368	0.0148674				202.856	136.554	1169.26	1090.97	51.4276	60.5536				0.00463372	-0.00474734	-0.146421	0.0121958	-0.0782066	-0.0706254	-0.0471952	0.0254112
32	27.1843	730.867	201.668	1294.17	120.929	18.2596				-0.0497003	-0.0294598	0.184975	-0.00358846	-0.0798402	-0.0181623	0.000703971	0.0384135				191.53	143.856	1133.96	1071.06	53.4782	71.3125				-0.0514567	0.0484712	-0.172189	-0.00627443	-0.0414515	0.0945019	-0.0213998	0.0376771
33	31.1987	739.455	152.173	1320.77	139.489	15.0596				0.0906338	-0.0180563	-0.105852	0.0168873	0.0613847	-0.19023	-0.0242054	0.043386				198.258	129.302	1610.07	1069.91	52.6115	53.6027				-0.0181352	-0.0576059	0.175376	-0.00734028	-0.0569863	-0.177308	-0.0236666	0.0468268
34	27.9333	797.755	162.471	1317.68	135.809	20.166				-0.023517	0.0593629	-0.0453418	0.0145152	0.0333832	0.0843468	0.0204582	0.0200509				196.59	123.777	1429.57	1071.52	56.6138	67.1652				-0.0263978	-0.0978724	0.0436105	-0.00585201	0.0147514	0.0308492	-0.00681852	0.0208984
35	31.7725	718.622	180.077	1297.57	154.187	20.2043				0.110692	-0.0457199	0.0581069	-0.000970031	0.173222	0.0864062	0.0636229	0.0320962				209.723	140.871	1324.82	1119.92	62.6897	79.433				0.0386427	0.0267149	-0.0328651	0.039055	0.123656	0.219135	0.0690565	0.0362908
36	30.9451	764.406	174.885	1338.16	129.253	20.1532				0.0817685	0.015077	0.0275976	0.0302778	-0.016499	0.0836585	0.0369801	0.0159766				213.55	149.911	1378.01	1062.34	63.0322	65.1384				0.0575962	0.0925984	0.00597069	-0.0143706	0.129795	-0.000258025	0.045222	0.0236013
37	30.2144	763.147	176.144	1372.48	129.702	26.1489				0.0562249	0.0134055	0.0349989	0.0567048	-0.0130833	0.406054	0.092384	0.0636718				212.971	121.441	1804.67	1082.47	62.7885	61.3527				0.0547282	-0.114902	0.317438	0.00430687	0.125427	-0.0583608	0.054773	0.0627484
38	31.8915	740.496	174.784	1253.55	142.342	22.2936				0.114852	-0.0166726	0.0270048	-0.0348639	0.0830957	0.19875	0.0620277	0.0359331				210.82	146.832	1521.37	1057.17	61.9793	59.6607				0.0440765	0.0701562	0.110622	-0.0191641	0.110923	-0.0843296	0.038714	0.0315657
39	32.1987	648.951	145.971	1287.7	142.04	24.6468				0.125591	-0.138239	-0.142293	-0.00857209	0.0807962	0.325284	0.0404279	0.072511				205.483	129.193	1454.72	1075.56	62.0253	63.6384				0.0176433	-0.0583996	0.0619695	-0.00210493	0.111748	-0.02328	0.0179293	0.0249447
40	28.5516	684.266	170.697	1224.68	139.707	18.017				-0.00190269	-0.0913432	0.00299246	-0.0570911	0.0630419	-0.0312072	-0.0192516	0.0218632				208.034	130.04	1392.94	1041.51	58.4483	79.7679				0.030278	-0.05223	0.016864	-0.0336885	0.0476331	0.224275	0.0388553	0.0402384
41	31.5778	744.867	168.832	1308.69	131.196	18.5787				0.103886	-0.0108688	-0.00796837	0.00759282	-0.00171987	-0.00100399	0.0149863	0.0179704				211.15	143.168	1689.81	1116.63	62.7494	57.3661				0.0457108	0.0434561	0.233585	0.0360038	0.124726	-0.119547	0.0606559	0.0474726
42	28.8575	801.364	190.288	1373.21	120.64	19.5064				0.00879086	0.0641546	0.118109	0.0572632	-0.0820385	0.0488794	0.0358597	0.0275837				213.199	148.723	1766.27	1134.02	49.4989	64.7277				0.0558549	0.0839391	0.289403	0.0521351	-0.112777	-0.00656143	0.0603323	0.0540245
43	29.2065	774.839	191.62	1355.26	135.333	25.7489				0.0209911	0.0289321	0.125934	0.0434462	0.0297643	0.384545	0.105602	0.057987				199.756	135.317	1455.65	1184.49	50.8621	74.5804				-0.0107208	-0.0137681	0.0626426	0.098964	-0.0883427	0.144657	0.0322387	0.0348887
44	30.5895	745.692	154.553	1299.05	131.111	25.1872				0.0693375	-0.00977299	-0.0918686	0.000167607	-0.00236284	0.354342	0.0533071	0.063733				215.346	127.337	1403.38	1118.85	56.0138	61.2768				0.0664913	-0.0719303	0.0244902	0.0380663	0.00399689	-0.0595257	0.000264777	0.0225113
45	29.8745	736.615	166.471	1339.92	144.311	24.434				0.0443428	-0.0218265	-0.0218383	0.0316338	0.0980772	0.313842	0.0740384	0.0513634				198.662	138	1342.35	1112.9	59.8253	62.8973				-0.0161363	0.00578792	-0.0200665	0.0325437	0.0723146	-0.0346544	0.0066315	0.0162502
46	26.5438	759.189	168.231	1301.25	125.884	14.434				-0.0720907	0.00814942	-0.0114992	0.00186344	-0.0421333	-0.223869	-0.0565965	0.0356243				201.389	143.649	1435.86	1098.39	59.8506	51.2589				-0.00262954	0.046956	0.0481977	0.0190798	0.0727681	-0.21328	-0.00481803	0.0430283
47	32.2732	777.608	165.688	1288.6	134.125	16.7702				0.128196	0.0326094	-0.0264433	-0.00787847	0.0205664	-0.0982489	0.00813348	0.0305165				204.816	168.757	1825.13	1123.71	69.7954	61.5134				0.014341	0.229958	0.33237	0.0425728	0.25102	-0.0558944	0.135728	0.063501
48	26.119	725.238	175.327	1309.77	138.613	15.9021				-0.0869407	-0.0369353	0.0301965	0.00842518	0.0547221	-0.144928	-0.0292433	0.0309695				201.086	136.812	1556.05	1130.27	63.3724	51.75				-0.00413409	-0.00287133	0.135939	0.0486588	0.135893	-0.205743	0.0179572	0.0515541
49	23.7137	786.762	182.784	1279.31	142.564	20.8468				-0.171024	0.0447651	0.0740116	-0.0150332	0.0847864	0.120954	0.0230766	0.0430428				197.391	158.134	1429.89	1168.06	58.5885	76.2946				-0.0224314	0.152529	0.0438435	0.0837189	0.0501461	0.170967	0.0797955	0.0295746
50	27.8915	724.748	153.188	1295.57	125.56	16.9021				-0.0249782	-0.0375853	-0.0998915	-0.00250988	-0.0446017	-0.0911565	-0.0501205	0.0155431				203.088	147.396	1402.78	1091.85	51.5609	59.9062				0.0057817	0.074269	0.0240502	0.0130132	-0.0758173	-0.0805617	-0.00654415	0.0246837
51	26.8183	805.769	193.587	1278.94	149.991	22.6043				-0.0624948	0.0700049	0.137487	-0.0153142	0.141297	0.215457	0.0810728	0.0427758				200.977	137.188	1408.21	1090.74	63.7126	69.3839				-0.00467242	-0.000129465	0.0280109	0.0119859	0.141991	0.0649018	0.040348	0.0227714
52	26.8797	775.685	170.481	1369.79	127.351	20.8128				-0.0603484	0.0300556	0.00172151	0.0546344	-0.030973	0.119126	0.019036	0.0261465				191.934	126.817	1762.51	1098.9	62.1885	76.875				-0.0494554	-0.0757188	0.286659	0.0195492	0.114673	0.179875	0.0792636	0.0573129
53	25.5634	722.126	179.183	1227.85	157.796	21.0894				-0.106363	-0.0410675	0.0528527	-0.054653	0.200682	0.133999	0.0309083	0.0487432				183.701	151.604	1643.93	1107.96	53.7563	77.8259				-0.0902329	0.104938	0.200092	0.0279601	-0.0364668	0.194469	0.0667934	0.0491097
54	30.0588	697.112	183.341	1319.45	123.689	16.3319				0.0507855	-0.0742843	0.077288	0.0158746	-0.0588391	-0.121817	-0.0184987	0.0319223				193.491	154.119	1418.8	1105.65	60.8322	83.5223				-0.0417469	0.123267	0.0357459	0.0258118	0.0903624	0.281897	0.0858896	0.0455525
55	31.0967	775.538	189.87	1282.47	148.938	18.9872				0.0870681	0.0298607	0.115651	-0.0125951	0.133282	0.0209615	0.0623714	0.0237126				193.45	147.163	1383.61	1128.68	59.4184	75.7991				-0.0419475	0.0725737	0.0100557	0.0471786	0.0650213	0.163362	0.0527073	0.0280476
56	25.217	698.21	171.942	1345.35	133	27.2638				-0.118473	-0.0728264	0.0103091	0.0358129	0.01201	0.466003	0.0554726	0.0855507				200.708	140.144	1404.99	1115.69	58.9172	68.1384				-0.00600215	0.0214112	0.0256655	0.0351311	0.0560377	0.0457859	0.0296715	0.00883468
57	27.6392	658.797	189.144	1374.75	148.982	14.183				-0.0337981	-0.125164	0.111385	0.0584494	0.13362	-0.237365	-0.0154787	0.0592706				199.44	180.495	1415.71	1118.51	54.6943	51.7589				-0.0122819	0.315506	0.0334886	0.0377434	-0.019654	-0.205606	0.024866	0.068603
58	23.9294	699.937	164.197	1302.96	124.187	22.217				-0.163484	-0.0705327	-0.0352006	0.00318139	-0.0550513	0.194631	-0.021076	0.0487161				206.663	136.624	1523.45	1104.43	66.6506	63.7679				0.0234887	-0.00424226	0.112144	0.0246796	0.194652	-0.0212924	0.0549049	0.0336702
59	25.9516	709.161	183.221	1238.23	132.289	20.8383				-0.0927926	-0.0582843	0.0765823	-0.0466555	0.00659915	0.120497	0.000991032	0.0339639				196.15	114.5	1770.3	1147.36	59.3287	73.8884				-0.0285784	-0.165488	0.292349	0.0645167	0.0634135	0.134037	0.0600416	0.0627668
60	30.4745	666.301	180.048	1393.01	131.875	10.2255				0.0653174	-0.115199	0.0579376	0.0725091	0.00345355	-0.450164	-0.0610243	0.0829593				196.2	135.312	1539.43	1236.01	63.5701	69				-0.0283313	-0.0138038	0.123803	0.146759	0.139437	0.0590097	0.0711456	0.0318398
61	32.0353	763.839	169.856	1448.55	115.244	22.3872				0.119879	0.0143248	-0.0019509	0.115274	-0.123094	0.203783	0.0547028	0.0471146				188.778	130.663	1415.01	1280.21	68.8	67.5223				-0.0650883	-0.0476836	0.0329761	0.18777	0.233178	0.03633	0.0629137	0.0499327
62	30.3529	702.245	172.793	1479.83	126.236	13.2255				0.0610666	-0.0674682	0.0153094	0.139354	-0.039461	-0.288851	-0.0300084	0.0598676				196.377	155.658	1809.65	1309.11	88.5241	67.25				-0.0274542	0.134488	0.321073	0.214582	0.586715	0.0321507	0.210259	0.0909191
63	32.6536	755.916	188.053	1472.04	94.6133	22.5574				0.141494	0.0038035	0.104973	0.133357	-0.280078	0.212935	0.0527473	0.0720948				196.817	196.644	1651.57	1282.62	83.3908	80.3616				-0.0252736	0.433201	0.205674	0.190012	0.494705	0.233387	0.255284	0.0763524
64	29.3725	741.587	177.332	1494.4	106.067	22.6255				0.0267941	-0.015224	0.0419764	0.15057	-0.192928	0.216597	0.0379641	0.0579858				214.921	182.183	1554.9	1285.43	90.2437	58.0446				0.0643835	0.327809	0.135101	0.19261	0.617537	-0.109133	0.204718	0.10145
65	23.7804	763.455	173.183	1450.94	117.738	18.2				-0.168693	0.013814	0.0175975	0.117113	-0.104122	-0.0213671	-0.0242762	0.041002				212.375	170.634	1694.81	1267.44	79.0644	82.5268				0.0517771	0.243633	0.237235	0.175927	0.417158	0.266619	0.232058	0.0487405
66	30.6588	818.504	184.514	1458.34	112.196	24.3957				0.0717601	0.0869152	0.084181	0.122811	-0.146293	0.311782	0.0885261	0.059571				217.158	171.668	1756.84	1284.82	78.046	86.6071				0.0754646	0.251173	0.282522	0.19205	0.398904	0.329243	0.254893	0.0458941
67	25.8654	816.874	184.904	1399.64	92.3911	19.5617				-0.095806	0.0847514	0.0864691	0.0776177	-0.296987	0.0518529	-0.0153503	0.0630712				228.016	173.248	1713.39	1249.27	110.499	79.9241				0.129236	0.262683	0.2508	0.159063	0.980591	0.226672	0.334841	0.130912
68	27.0261	819.518	191.562	1469.43	102.969	24.9787				-0.0552306	0.0882617	0.125595	0.131346	-0.2165	0.343131	0.0694338	0.0773629				239.421	196.47	1752.23	1254.61	86.2713	73.4777				0.185719	0.431938	0.279157	0.164017	0.546335	0.127733	0.28915	0.0680794
69	24.0222	776.413	191.962	1394.93	93.5822	24.4213				-0.16024	0.0310214	0.127939	0.0739899	-0.287924	0.313159	0.0163242	0.0871496				247.16	193.812	1745.69	1267.93	94.9471	85.567				0.224048	0.412563	0.274378	0.176377	0.701841	0.313279	0.350414	0.0776276
70	24.2092	875.937	182.529	1464.7	106.151	27.3106				-0.153703	0.163183	0.0725139	0.127708	-0.192286	0.468519	0.0809892	0.098141				245.924	212.51	1796.78	1281.27	107.926	89.3214				0.217925	0.54884	0.311676	0.188756	0.934483	0.370902	0.428764	0.113913
71	28.349	847.308	189.226	1416.81	101.862	17.9106				-0.00898511	0.125165	0.111866	0.0908311	-0.224921	-0.0369284	0.00950464	0.0541363				255.026	228.975	1895.59	1270.99	102.234	71.5982				0.263004	0.668845	0.383808	0.179213	0.832461	0.0988868	0.40437	0.117988
72	25.3255	870.741	198.957	1453.95	98.8889	27.3362				-0.11468	0.156283	0.169042	0.119429	-0.247545	0.469896	0.092071	0.10192				255.544	194.658	1806.76	1224.49	113.871	94.9688				0.265568	0.418732	0.318961	0.136078	1.04104	0.457578	0.43966	0.129029
73	31.8222	831.678	169.216	1430.93	101.667	24.9957				0.11243	0.10441	-0.00570852	0.101707	-0.226408	0.344045	0.0717459	0.0758642				265.849	218.634	1845.63	1222.46	94.6184	76.1741				0.316602	0.593472	0.347338	0.134187	0.69595	0.169118	0.376111	0.092247
74	22.698	848.336	180.861	1369.95	89.7956	23.6255				-0.206531	0.12653	0.0627118	0.0547523	-0.316737	0.270368	-0.00148424	0.0892567				271.808	221.139	1922.3	1251.01	83.2828	67.8393				0.346116	0.611728	0.403311	0.160676	0.492769	0.0411953	0.342633	0.0861433
75	32.5582	873.343	165.899	1425.66	90.8622	24.5404				0.138159	0.159738	-0.0252005	0.0976494	-0.308621	0.319563	0.0635479	0.0871611				272.545	238.317	1931.39	1239.75	91.6	87.3125				0.349764	0.736929	0.409943	0.150233	0.641847	0.340069	0.438131	0.0879176
76	25.783	820.727	185.221	1425.67	94.6133	20.3915				-0.0986865	0.0898682	0.0883341	0.0976529	-0.280078	0.0964721	-0.00107289	0.0640047				277.14	222.748	1864.77	1247.64	98.1379	79.375				0.372523	0.623455	0.361307	0.157553	0.759033	0.218245	0.415353	0.0951298
77	24.0745	852.65	175.106	1417.25	100.493	30.1404				-0.158412	0.13226	0.0288974	0.0911745	-0.235337	0.620681	0.0798773	0.123028				282.908	219.485	1891.65	1188.31	98.1908	83.5268				0.401088	0.599678	0.380929	0.102504	0.759982	0.281967	0.421024	0.0947992
78	31.6405	814.65	194.284	1438.32	107.622	21.434				0.106078	0.0817984	0.141584	0.107398	-0.181092	0.152528	0.0680492	0.0509245				282.933	204.936	1895.88	1244.51	99.4988	84.0938				0.401212	0.493636	0.38402	0.154651	0.783426	0.290669	0.417936	0.0868446
79	28.6706	783.406	171.601	1388.46	95.8978	23.2723				0.00225727	0.0403076	0.00830365	0.0690063	-0.270304	0.251376	0.0168244	0.0685605				288.635	244.054	1883.1	1205.82	92.0299	83.6161				0.429451	0.778747	0.37469	0.118757	0.649553	0.283337	0.439089	0.0984503
80	28.4784	889.538	170.178	1302.62	104.076	26.5915				-0.00446159	0.181245	-5.82885e-05	0.00291777	-0.208079	0.429853	0.0669028	0.088335				296.589	217.297	1976.11	1206.54	96.0161	83.8884				0.468842	0.58373	0.442592	0.119417	0.721002	0.287516	0.437183	0.0868785
81	26.7307	816.825	190.428	1102.31	114.218	22.1149				-0.0655571	0.0846865	0.118928	-0.151306	-0.130906	0.189141	0.0074978	0.058046				345.044	182.574	1981.86	1075.96	81.5103	75.2232				0.708813	0.33066	0.446786	-0.00173204	0.460999	0.154523	0.350008	0.102101
82	32.6732	831.175	169.683	1089.77	103.587	25.4553				0.142179	0.103742	-0.00296801	-0.160965	-0.211799	0.368758	0.0398245	0.0872202				351.336	195.876	1859.87	984.682	78.0598	91.7812				0.739975	0.427608	0.357729	-0.0864182	0.399152	0.408655	0.37445	0.10815
83	35.3333	824.727	171.659	1012.22	141.507	27.3532				0.23517	0.0951799	0.00864269	-0.220672	0.0767383	0.47081	0.110978	0.0943025				354.483	230.589	1728.89	917.274	69.1241	75.5625				0.755558	0.680607	0.262118	-0.148959	0.238987	0.159731	0.324674	0.13846
84	21.2105	857.993	163.822	1047.04	134.671	30.3702				-0.25853	0.139354	-0.0374041	-0.193863	0.0247255	0.633037	0.0512199	0.130492				333.172	199.317	1814.74	846.411	64.9563	87.9598				0.650019	0.452684	0.324785	-0.214705	0.164283	0.350004	0.287845	0.119916
85	30.6967	844.28	179.072	1035.01	148.747	26.9234				0.073085	0.121144	0.0522028	-0.20312	0.131828	0.447699	0.103807	0.0850801				339.149	173.54	1755.78	818.848	49.6138	68.933				0.679619	0.264812	0.281745	-0.240277	-0.110717	0.0579814	0.155527	0.134115
86	29.9386	802.538	187.332	1082.17	157.316	20.1362				0.0465836	0.0657148	0.100735	-0.166812	0.19703	0.0827444	0.0543326	0.0491316				345.685	172.441	1935.86	801.223	55.7379	80.3661				0.711985	0.256802	0.413205	-0.25663	-0.000948364	0.233456	0.226312	0.136219
87	30.8444	800.622	175.654	1095.22	150.071	23.4043				0.0782483	0.0631703	0.0321173	-0.156765	0.141906	0.258474	0.069525	0.0558759				328.632	208.663	1596.7	796.667	60.6874	73.1429				0.627531	0.520805	0.165616	-0.260857	0.087767	0.122595	0.210576	0.1313
88	27.3922	756.888	179.394	1154.16	148.84	25.0553				-0.0424326	0.00509425	0.0540954	-0.111385	0.132538	0.34725	0.0641934	0.0659755				328.923	192.376	1880.21	757.973	56.2345	79.2946				0.628975	0.402099	0.372578	-0.296757	0.00795274	0.217011	0.221977	0.133627
89	28.3582	870.455	197.87	1151.52	138.809	19.8553				-0.0086635	0.155902	0.162658	-0.11342	0.0562105	0.0676401	0.0533879	0.042558				330.812	205.168	1288.55	762.735	52.6736	73.4598				0.638329	0.495332	-0.0593423	-0.292339	-0.0558732	0.127459	0.142261	0.14603
90	28.0876	763.783	185.293	1200.54	153.947	29.9702				-0.018123	0.0142505	0.0887577	-0.0756768	0.171395	0.611529	0.132022	0.102128				309.158	192.762	1785.97	771.923	55.308	84.2277				0.53109	0.404914	0.303786	-0.283815	-0.00865393	0.292724	0.206674	0.122246
91	27.4575	727.664	175.673	1174.79	126.364	27.2511				-0.0401499	-0.0337129	0.0322307	-0.095504	-0.0384809	0.46532	0.0482838	0.0850341				309.236	168.302	1530.67	630.467	60.9494	69.1295				0.531478	0.226639	0.117414	-0.415056	0.0924631	0.0609972	0.102322	0.125079
92	28.4118	739.273	180.433	1159.82	143.569	20.2638				-0.00678977	-0.0182978	0.0601975	-0.107032	0.0924298	0.0896056	0.0183522	0.0316292				315.065	185.168	1889.1	776.229	54.6988	78.4821				0.560344	0.349566	0.37907	-0.279819	-0.0195733	0.204541	0.199021	0.124196
93	25.681	764.021	164.236	1275.2	152.667	25.6851				-0.102252	0.0145662	-0.0349744	-0.0181926	0.161656	0.381115	0.0669862	0.072268				302.779	194.762	1565.09	726.152	48.708	63.7589				0.499499	0.41949	0.14254	-0.326281	-0.126953	-0.0214305	0.0978109	0.130566
94	30.6209	728.699	190.976	1262.8	146.853	24.6596				0.0704352	-0.0323385	0.122148	-0.0277439	0.117421	0.325972	0.0959824	0.0536864				299.909	183.787	1317	806.628	44.5747	74.8571				0.485284	0.339499	-0.0385706	-0.251615	-0.201039	0.148904	0.0804105	0.121017
95	29.583	744.154	170.163	1261.92	152.044	26.4894				0.0341526	-0.0118159	-0.000142901	-0.0284166	0.156921	0.424363	0.0958434	0.0711115				289.803	176.396	1870.13	829.902	49.3241	78.6116				0.435237	0.28563	0.365226	-0.230022	-0.11591	0.206528	0.157782	0.110157
96	30.9085	771.979	166.615	1306.84	154.658	25.4255				0.080489	0.0251339	-0.020991	0.00616399	0.176806	0.367156	0.105793	0.0595818				278.613	198.525	1313.54	790.434	41.8736	71.0536				0.379818	0.446911	-0.0410971	-0.266639	-0.249453	0.0905283	0.0600112	0.124578
97	27.9464	731.462	169.024	1249.5	160.671	21.1362				-0.0230591	-0.0286705	-0.00683844	-0.0379852	0.222562	0.136515	0.0437541	0.0445448				283.748	181.426	1290.37	808.92	50.0552	64.6429				0.405246	0.322288	-0.0580117	-0.249489	-0.102806	-0.00786294	0.0515608	0.104624
98	29.0928	758.504	167.721	1281.18	159.422	22.6723				0.0170164	0.00723939	-0.0144935	-0.0135904	0.213059	0.219113	0.0713907	0.0460296				268.643	179.505	1712.09	781.908	43.5609	61.5893				0.330441	0.308289	0.249847	-0.274551	-0.21921	-0.0547295	0.0566812	0.111625
99	31.834	677.468	169.322	1236.05	147.978	25.3234				0.112842	-0.100369	-0.00508685	-0.0483411	0.125978	0.361666	0.074448	0.0679675				267.497	190.411	1443.16	810.336	40.6437	61.9241				0.324765	0.387775	0.0535303	-0.248175	-0.271498	-0.049591	0.0328012	0.11402
100	30.2588	715.217	185.615	1264.56	163.911	18.6128				0.057777	-0.0502423	0.0906503	-0.0263843	0.247216	0.000829598	0.0533076	0.0442877				263.222	144.896	1108.33	827.744	46.3448	59.9241				0.303592	0.0560482	-0.1909	-0.232024	-0.169311	-0.0802869	-0.0521471	0.0825396
101	29.3765	746.825	196.688	1295.87	148.871	27.2043				0.0269339	-0.00826857	0.155708	-0.0022809	0.132775	0.462803	0.127945	0.0727188				255.847	178.089	1295.33	838.893	41.4782	73.4241				0.267069	0.29797	-0.0543875	-0.22168	-0.256541	0.126911	0.026557	0.0983023
102	31.0745	754.797	183.077	1389.3	157.049	20.0894				0.086292	0.00231768	0.0757344	0.0696548	0.195	0.0802279	0.0848712	0.0253523				267.115	158.54	1339.96	853.473	49.0253	61.6964				0.322874	0.155487	-0.0218113	-0.208153	-0.121266	-0.0530857	0.0123409	0.0793382
103	31.9608	708.671	190.553	1248.95	162.649	28.8723				0.117275	-0.0589343	0.119662	-0.0384049	0.237611	0.552494	0.154951	0.0914095				264.004	195.738	1155.13	861.244	45.669	57.1205				0.307467	0.426598	-0.156735	-0.200943	-0.181424	-0.123316	0.0119411	0.113832
104	30.3948	709.671	169.135	1361.51	154.102	24.1362				0.0625313	-0.0576063	-0.00618857	0.0482565	0.172579	0.297829	0.0862334	0.0527459				255.113	164.193	1381.62	885.869	58.2368	65.4286				0.263434	0.196692	0.00860086	-0.178096	0.0438422	0.00419595	0.0564447	0.0639533
105	28.0967	746.091	190.053	1225.21	124.462	23.2298				-0.0178049	-0.00924367	0.116724	-0.0566819	-0.052955	0.24909	0.0381883	0.0494436				246.155	161.649	1711.43	855.324	48.4989	67.2277				0.21907	0.178146	0.249366	-0.206435	-0.130701	0.0318085	0.0568757	0.0781477
106	26.9647	800.811	148.952	1281.77	171.84	21.1574				-0.057377	0.063421	-0.124779	-0.0131327	0.307547	0.137655	0.0522225	0.0633056				247.409	171.223	1847.11	864.926	53.377	73.8304				0.225282	0.247926	0.348415	-0.197527	-0.0432654	0.133146	0.118996	0.0831201
107	29.485	738.916	185.192	1272	130.689	28.5617				0.0307268	-0.0187713	0.0881642	-0.020662	-0.0055754	0.535792	0.101612	0.0884402				248.583	162.252	1598.58	836.682	51.7057	64.9152				0.231093	0.182548	0.166988	-0.223732	-0.0732219	-0.00368369	0.0466653	0.0723367
108	31.5242	684.364	183.375	1236.28	145.338	19.966				0.102012	-0.0912132	0.077486	-0.0481572	0.10589	0.0735926	0.0366017	0.0344673				233.822	161.549	1444.16	879.941	47.0253	60.308				0.157991	0.177424	0.0542604	-0.183596	-0.157114	-0.0743948	-0.00423829	0.0640843
109	29.1712	751.958	179.606	1336.99	156.836	23.0936				0.0197571	-0.00145244	0.0553387	0.0293761	0.193377	0.241767	0.089694	0.0415908				233.432	153.252	1350.65	880.116	42.2069	78.4866				0.156059	0.116953	-0.0140089	-0.183433	-0.243479	0.20461	0.00611671	0.0758945
110	28.3477	665.308	163.962	1308.19	160.867	19.766				-0.00903056	-0.116518	-0.036585	0.00720786	0.22405	0.0628384	0.0219938	0.0470083				231.936	176.144	1172.89	877.812	48.1609	70.0179				0.14865	0.283791	-0.143776	-0.185571	-0.136759	0.0746324	0.00682799	0.0778321
111	29.9739	734.098	160.322	1348.57	162.236	27.2043				0.0478176	-0.0251695	-0.0579696	0.038296	0.234466	0.462803	0.116707	0.0806608				233.07	153.455	1612.55	907.598	49.754	62.9241				0.154266	0.118432	0.177188	-0.157936	-0.108204	-0.034243	0.0249171	0.0586853
112	32.7516	731.65	183.913	1326.01	180.658	24.9234				0.14492	-0.0284198	0.0806502	0.0209277	0.374643	0.340157	0.15548	0.0682575				246.002	157.574	1795.61	830.938	54.5793	61.817				0.218313	0.148452	0.310822	-0.229061	-0.0217152	-0.0512348	0.0625958	0.0813151
113	31.6039	799.839	185.514	1291.49	154.707	17.6638				0.104799	0.0621303	0.0900569	-0.00565193	0.177178	-0.0501991	0.0630522	0.0331882				255.554	180.639	1639.85	871.22	57.5701	60.9018				0.26562	0.316552	0.197115	-0.191687	0.0318922	-0.0652812	0.0923685	0.0817403
114	35.7739	739.182	184.726	1215.6	140.871	20.7404				0.250572	-0.0184185	0.0854243	-0.0640794	0.071902	0.115233	0.0734389	0.0449511				248.802	160.272	1420.85	873.009	44.9103	68.9196				0.232181	0.168116	0.0372423	-0.190027	-0.195023	0.0577757	0.0183773	0.0728043
115	35.3922	788.482	195.212	1301.85	158.196	27.8766				0.237229	0.0470494	0.147036	0.0023247	0.203726	0.498954	0.189386	0.0719657				230.406	174.559	1446.4	926.634	55.0989	73.5536				0.141075	0.272244	0.0558913	-0.140274	-0.0124019	0.128898	0.0742387	0.057885
116	31.0732	844.895	210.096	1287.85	157.004	19.0298				0.0862466	0.121961	0.234496	-0.00845422	0.194662	0.0232521	0.108694	0.0386956				236.762	157.446	1305.01	947.057	60.9333	61.192				0.172554	0.147513	-0.0473204	-0.121326	0.0921745	-0.0608272	0.0304612	0.050041
117	31.5333	781.014	196.212	1328.28	150.956	20.234				0.102331	0.0371318	0.152912	0.0226757	0.148636	0.0880032	0.0919481	0.0222538				246.551	139.866	1696.5	918.116	49.6621	53.1071				0.221029	0.0193901	0.238473	-0.148177	-0.109852	-0.184914	0.00599155	0.0761798
118	28.5307	799.594	189.673	1383.98	152.058	22.7489				-0.0026333	0.0618052	0.114493	0.0655554	0.157023	0.223232	0.103246	0.0325389				248	159.03	1706.45	913.863	54.3816	63.317				0.228209	0.159059	0.245731	-0.152123	-0.0252588	-0.0282128	0.0712342	0.0663056
119	32.7791	802.573	183.726	1280.78	115.009	33.5149				0.145881	0.0657611	0.0795485	-0.0138956	-0.124886	0.802131	0.15909	0.134075				247.517	169.629	1406.4	946.747	61.3241	62.5536				0.225815	0.236308	0.0266959	-0.121614	0.0991792	-0.0399294	0.0710759	0.0587244
120	30.6353	827.839	182.635	1310.06	131.209	18.4638				0.0709386	0.0993123	0.0731356	0.00864368	-0.00161867	-0.00718229	0.0405382	0.0187198				241.217	187.049	1565.52	937.762	47.9724	75.192				0.194615	0.363276	0.142851	-0.12995	-0.140138	0.154044	0.0974497	0.0803176
121	34.7033	742.839	198.144	1348.6	149.742	23.817				0.213146	-0.0135617	0.164268	0.0383169	0.139403	0.280665	0.13704	0.0445699				232.893	183.53	1548	952.497	56.3931	61.7768				0.153392	0.337623	0.130063	-0.116279	0.0107955	-0.0518517	0.0772904	0.0670616
122	32.4889	799.671	172.192	1358.53	157.849	17.5489				0.135736	0.0619073	0.011778	0.0459606	0.201088	-0.0563774	0.0666821	0.0371679				235.84	175.139	1355.62	956.366	52.5172	64.1205				0.167987	0.276466	-0.0103744	-0.112689	-0.0586765	-0.0158807	0.0411386	0.0608277
123	32.0209	770.72	184.909	1329.55	165.711	13.4043				0.119376	0.0234624	0.0864978	0.0236502	0.260912	-0.279237	0.0391103	0.0729641				225.349	175.866	1461.04	918.542	63.0368	73.4286				0.116029	0.28177	0.0665774	-0.147782	0.129878	0.12698	0.0955751	0.0569542
124	30.9124	792.294	171.365	1344.99	149.244	27.4213				0.0806254	0.0521104	0.0069193	0.0355389	0.135615	0.474472	0.13088	0.071008				224.738	168.649	1421.42	949.092	57.6368	68.6562				0.113002	0.229164	0.0376565	-0.119438	0.0330877	0.0537331	0.0578676	0.046497
125	36.4902	841.196	191.606	1360.77	157.418	24.017				0.275612	0.117049	0.125849	0.0476842	0.197807	0.291419	0.175903	0.0392322				229.418	174.723	1427.28	944.762	58.4184	63.192				0.13618	0.273435	0.041933	-0.123455	0.0470972	-0.0301313	0.0575097	0.0558549
126	27.0667	777.755	182.101	1339.92	147.511	25.2128				-0.0538113	0.0328043	0.0700002	0.0316338	0.122426	0.355718	0.0931286	0.0575496				235.974	167.802	1507.01	918.661	59.2713	72.8527				0.16865	0.222994	0.100137	-0.147672	0.0623846	0.118141	0.0874393	0.0522747
127	31.681	827.951	181.865	1325.65	166.293	18.7319				0.107494	0.0994608	0.0686158	0.0206469	0.265342	0.00723373	0.0947988	0.037912				230.974	159.154	1414.65	906.473	66.9931	71.2723				0.143885	0.159961	0.032712	-0.158979	0.200791	0.0938849	0.0787092	0.0531023
128	31.5281	791.734	161.077	1379.35	162.898	24.1574				0.102149	0.0513676	-0.0535345	0.0619937	0.239505	0.298969	0.116742	0.0531525				243.331	168.183	1659.69	931.42	51.223	73.3214				0.205085	0.225773	0.211597	-0.135834	-0.0818739	0.125334	0.09168	0.0653804
129	28.5281	800.308	175.519	1311.29	145.173	27.0468				-0.00272419	0.0627524	0.0313264	0.00959046	0.104638	0.454335	0.109986	0.0706649				239.698	162.619	1635.94	950.949	56.4368	62.8527				0.187091	0.185218	0.194258	-0.117715	0.0115788	-0.0353389	0.0708485	0.0554278
130	37.3216	786.958	182.716	1290.14	163.662	21.8085				0.304676	0.0450251	0.0736156	-0.0066924	0.245322	0.172666	0.139102	0.0497389				237.1	161.406	1556.38	963.768	62.1402	66.1875				0.174224	0.176378	0.136182	-0.105822	0.113807	0.0158435	0.0851022	0.0450762
131	32.1242	792.504	173.721	1358.29	171.378	18.166				0.122987	0.052389	0.0207617	0.0457803	0.30403	-0.0231953	0.0871255	0.0475481				246.041	189.391	1623.2	973.872	59.0989	63.8036				0.218503	0.380343	0.184959	-0.0964472	0.0592945	-0.0207445	0.120985	0.0711895
132	27.2719	744.175	211.38	1286.16	138.969	30.5574				-0.046638	-0.0117881	0.242038	-0.00975816	0.0574279	0.643103	0.145731	0.108081				233.079	169.535	1605.71	940.03	67.8759	74.4509				0.154313	0.235623	0.172191	-0.127846	0.216614	0.14267	0.132261	0.0540505
133	33.7843	808.86	186.159	1391.36	149.484	27.6979				0.18102	0.0741096	0.0938427	0.0712362	0.137442	0.489345	0.174499	0.0652662				236.02	192.916	1714.47	977.646	62.5356	64.4018				0.168879	0.406032	0.251587	-0.0929459	0.120894	-0.0115633	0.14048	0.073407
134	29.7634	774.902	166.385	1253.02	151.413	21.1021				0.040459	0.0290156	-0.0223472	-0.0352731	0.152119	0.134682	0.0497758	0.0319562				226.442	179.916	1653.43	959.405	59.3885	68.6473				0.121445	0.311284	0.207025	-0.10987	0.0644854	0.0535965	0.107994	0.058774
135	28.1346	763.35	159.981	1314.36	155.227	13.5915				-0.01648	0.0136748	-0.059975	0.0119522	0.181135	-0.269171	-0.023144	0.0595112				230.173	150.856	1441.26	942.967	62.4138	74.442				0.139919	0.0994895	0.0521429	-0.12512	0.118711	0.142533	0.0712793	0.0415424
136	31.2078	805.308	205.067	1348.31	129.924	25.6979				0.0909519	0.0693921	0.204947	0.0380915	-0.0113926	0.381803	0.128965	0.0584957				232.78	154.342	1325.22	963.958	67.7747	71.7723				0.152832	0.124891	-0.03257	-0.105645	0.2148	0.101559	0.0759779	0.049327
137	32.1542	855.965	195.697	1353.54	141.773	23.7191				0.124036	0.136661	0.149889	0.0421179	0.0787669	0.275401	0.134479	0.0325805				240.141	150.743	1407.72	933.048	62.3425	72.0357				0.189288	0.09866	0.0276588	-0.134324	0.117433	0.105602	0.0673862	0.0454857
138	31.6497	776.175	174.236	1300.35	155.382	22.9702				0.1064	0.0307056	0.0237842	0.00116635	0.182318	0.235132	0.0965843	0.0388958				234.386	165.634	1177.19	1015.49	69.1126	66.1295				0.160783	0.207191	-0.140633	-0.0578306	0.238781	0.0149533	0.0705408	0.0630569
139	28.5595	811.413	208.928	1381.76	154.569	17.1277				-0.00162652	0.077499	0.227631	0.0638491	0.17613	-0.0790258	0.0774095	0.0459038				224.069	174.248	1232.32	984.11	60.6391	55.2768				0.109692	0.269971	-0.100389	-0.0869484	0.0869012	-0.151614	0.0212689	0.065924
140	31.0876	837.566	181.337	1324.43	157.022	24.4426				0.08675	0.112229	0.0655081	0.0197104	0.194797	0.314304	0.132217	0.0434536				213.824	185.233	1672.34	974.134	63.9149	51.9464				0.0589522	0.350035	0.220833	-0.0962042	0.145617	-0.202728	0.0794174	0.0833632
141	33.0222	795.371	160.163	1371.12	140.08	25.4468				0.154379	0.0561963	-0.0589015	0.0556575	0.0658824	0.368301	0.106919	0.0591478				219.35	158.827	1829.11	941.693	66.3517	60.9598				0.0863194	0.15758	0.335275	-0.126302	0.189294	-0.064391	0.0962958	0.0695186
142	38.9673	775.462	189.938	1334.52	152.125	19				0.362206	0.0297584	0.116046	0.0274791	0.15753	0.0216497	0.119112	0.0536841				212.325	178.386	1390.79	958.634	60.177	70.942				0.0515275	0.300135	0.0152952	-0.110585	0.0786185	0.0888154	0.0706344	0.0545688
143	30.7935	810.664	200.51	1307.57	151.449	24.8936				0.0764689	0.0765053	0.178167	0.0067292	0.152389	0.338555	0.138136	0.0472025				211.849	181.941	1258.51	996.211	71.2644	73.6473				0.0491696	0.326041	-0.0812687	-0.0757209	0.27735	0.130336	0.104318	0.0706343
144	33.681	873.797	189.822	1358.46	162.142	23.1106				0.177409	0.160341	0.115368	0.0459086	0.233756	0.242681	0.162577	0.030303				221.492	179.238	1270.28	949.179	63.4207	60.1205				0.0969295	0.306341	-0.0726793	-0.119358	0.136759	-0.0772726	0.0451199	0.0671386
145	30.2601	860.532	190.284	1350.91	159.009	19.5872				0.0578225	0.142725	0.118081	0.0400995	0.209914	0.0532241	0.103644	0.0269003				211.669	190.866	1452.13	988.235	63.6023	63.308				0.0482821	0.391094	0.0600746	-0.0831212	0.140014	-0.0283509	0.0879988	0.0682517
146	38.0209	845.168	167.288	1347.41	158.631	20.5404				0.329122	0.122323	-0.017036	0.0374048	0.20704	0.104479	0.130555	0.0504931				226.589	177.49	1757.88	966.661	62.8621	77.7188				0.122168	0.293604	0.283278	-0.103138	0.126747	0.192826	0.152581	0.0593221
147	37.2915	873.587	189.053	1318.36	159.831	12.3957				0.303624	0.160063	0.110849	0.0150354	0.21617	-0.33347	0.0787118	0.091484				227.285	166.5	1387.79	931.905	77.446	68.9643				0.125619	0.213505	0.0131103	-0.135384	0.38815	0.0584618	0.110577	0.0731619
148	35.1516	791.853	182.986	1335.82	147.302	18.6426				0.228818	0.0515253	0.075198	0.0284743	0.120837	0.00243197	0.0845474	0.0332645				217.574	165.396	1282.65	973.714	68.9333	68.5938				0.0775258	0.205459	-0.0636448	-0.0965935	0.235567	0.0527753	0.0685148	0.055292
149	34.1752	775.273	180.293	1259.12	157.973	27.0936				0.194685	0.0295077	0.0593784	-0.0305739	0.202034	0.456851	0.15198	0.0716882				230.028	150.777	1378.51	980.054	68.1333	79.4241				0.139201	0.0989122	0.00633307	-0.090712	0.221228	0.218998	0.0989934	0.0501774
150	36.0092	865.643	163.678	1270.85	161.382	20.2596				0.258798	0.149514	-0.0382514	-0.0215464	0.227973	0.0893797	0.110978	0.0507681				228.546	150.738	1281.06	981.682	58.1954	84.5402				0.131862	0.0986236	-0.0648096	-0.0892016	0.0431001	0.29752	0.0695158	0.0579231
151	36.0366	806.014	176.337	1257.3	176.102	20.4255				0.259755	0.07033	0.0361288	-0.031975	0.339979	0.0983004	0.128753	0.0578882				231.922	188.119	1580.33	939.515	67.7264	73.1875				0.148583	0.37107	0.153662	-0.128324	0.213935	0.123279	0.147034	0.066106
152	33.1163	880.273	180.841	1312.55	162.769	20.7362				0.157669	0.16894	0.0625984	0.010565	0.238524	0.115007	0.125551	0.0331528				220.056	173.658	1783.2	982.821	82.8713	68.317				0.0898143	0.265678	0.301761	-0.088144	0.485393	0.048527	0.183838	0.0841948
153	31.0235	816.07	168.25	1350.91	161.453	16.7617				0.0845092	0.0836835	-0.0113864	0.0400926	0.228514	-0.098706	0.0544511	0.0447414				217.836	157.416	1760.18	934.559	66.3103	79.942				0.0788214	0.147296	0.284955	-0.132921	0.188552	0.226947	0.132275	0.0602365
154	28.7242	808.126	151.192	1293.49	155.413	23.4766				0.00413101	0.0731345	-0.111615	-0.00411208	0.182555	0.262361	0.0677424	0.0555176				220.032	186.178	1592.26	1013.51	62.4161	82.5134				0.0896975	0.356926	0.162375	-0.0596668	0.118752	0.266413	0.15575	0.0591321
155	28.3033	798.51	191.596	1292.35	131.547	18.8851				-0.0105827	0.0603659	0.125793	-0.00498957	0.000951683	0.0154715	0.0311682	0.021615				211.32	188.406	1318.57	1015.01	70.5678	67.6786				0.0465488	0.373162	-0.0374212	-0.0582751	0.264864	0.0387289	0.104601	0.0712314
156	30.6471	817.175	195.072	1381.49	158.96	18.9957				0.0713511	0.0851508	0.146217	0.0636411	0.209542	0.0214185	0.0995534	0.0274909				210.389	154.951	1452.96	960.321	69.3977	85.0179				0.0419425	0.129329	0.0606856	-0.109019	0.243891	0.304852	0.111947	0.0609038
157	33.8026	905.021	161.005	1335.73	167.098	20.0553				0.18166	0.201804	-0.0539582	0.028405	0.271463	0.0783943	0.117961	0.0495958				203.56	151.733	1461.19	1029.54	59.8	78.8571				0.00812124	0.105876	0.0666913	-0.0448	0.0718611	0.210296	0.0696743	0.0355865
158	32.8523	855.147	204.587	1298.03	157.511	19.383				0.14844	0.135575	0.202122	-0.000616251	0.198517	0.0422441	0.121047	0.0339353				200.396	161.955	1836.16	938.113	62.931	74.7857				-0.00754831	0.180383	0.340426	-0.129624	0.127981	0.147808	0.109904	0.0660908
159	29.8954	855.224	177.851	1271.03	156.68	28.5064				0.0450734	0.135677	0.0450278	-0.0214042	0.192193	0.532819	0.154898	0.0816088				206.256	205.663	1811.52	953.455	62.9356	75.8839				0.021474	0.49894	0.322435	-0.11539	0.128064	0.164664	0.170031	0.0888317
160	31.4431	922.476	176.341	1293.81	165.884	27.6				0.0991774	0.224983	0.036157	-0.00386586	0.262231	0.484081	0.183794	0.0735286				213.313	188.114	1664.66	980.316	56.7977	88.6473				0.0564225	0.371034	0.215226	-0.090469	0.0180476	0.360556	0.155136	0.0777345
161	34.8157	834.888	190.49	1315.41	156.458	24.9574				0.217076	0.108673	0.119295	0.0127638	0.190503	0.341985	0.165049	0.0458707				207.787	169.287	1506.83	986.658	61.8184	91.9955				0.0290552	0.233818	0.100008	-0.0845847	0.108039	0.411944	0.133047	0.0701981
162	32.6915	909.448	177.173	1346.42	158.564	22.1277				0.142819	0.207683	0.0410445	0.0366383	0.206532	0.189829	0.137424	0.0326264				218.029	161.356	1503.63	1006.71	62.8414	60.1027				0.0797792	0.176017	0.097673	-0.0659846	0.126375	-0.0775458	0.0560523	0.0425729
163	26.9203	880.986	160.683	1251.4	188.28	31.183				-0.0589291	0.169888	-0.0558508	-0.0365182	0.432641	0.676742	0.187995	0.125152				208.74	175.698	1439.39	986.637	71.4184	67.5045				0.0337759	0.280543	0.0507759	-0.084604	0.28011	0.0360568	0.099443	0.0605557
164	26.4039	824.42	189.913	1278.47	159.169	21.9106				-0.0769813	0.0947713	0.115905	-0.0156748	0.211132	0.178156	0.0845513	0.0454643				210.899	149.827	1824.47	975.824	69.1586	69.8348				0.0444643	0.0919847	0.331889	-0.0946358	0.239606	0.0718222	0.114188	0.0616116
165	33.5242	900.238	183.644	1348.99	132.44	28.4851				0.171928	0.195452	0.0790678	0.0386152	0.00774889	0.531673	0.170748	0.078169				216.244	175.921	1931.43	982.208	67.2759	75.8571				0.0709391	0.282167	0.409974	-0.0887128	0.20586	0.164252	0.17408	0.0702694
166	32.4745	844.098	167.269	1265.58	171.089	23.1404				0.135233	0.120903	-0.0171494	-0.0256005	0.301832	0.244283	0.126584	0.0543113				218.003	161.248	1606.45	966.836	69.869	68.5134				0.0796494	0.175223	0.17273	-0.102975	0.252339	0.0515414	0.104751	0.050984
167	33.5516	861.021	176.923	1295.63	178.916	35.183				0.172886	0.143375	0.0395756	-0.00246822	0.361386	0.891826	0.267764	0.135128				209.91	163.431	1641.86	912.946	71.9287	52.5268				0.0395663	0.191135	0.198581	-0.152974	0.289257	-0.19382	0.0619575	0.0814733
168	29.4444	941.636	182.822	1273.84	149.849	21.2723				0.0293075	0.250427	0.0742373	-0.0192401	0.140215	0.143834	0.10313	0.0391525				220.409	175.322	1609.3	939.485	57.3885	50.5357				0.091563	0.277801	0.174816	-0.128351	0.0286372	-0.22438	0.0366811	0.0765257
169	34.7529	891.965	184.014	1282.62	161.702	23.0894				0.21488	0.184467	0.0812431	-0.0124841	0.230408	0.241541	0.156676	0.041273				210.675	158.49	1437.48	966.265	72.7034	82.2634				0.0433579	0.155126	0.0493781	-0.103505	0.303143	0.262576	0.118346	0.0621564
170	34.7595	962.986	190.255	1244.21	153.182	20.6894				0.215111	0.278778	0.117911	-0.0420568	0.165578	0.112491	0.141302	0.0446969				217.125	173.574	1488.72	944.059	64.754	62.75				0.0753007	0.265065	0.0867849	-0.124107	0.160657	-0.0369151	0.0711309	0.056474
171	35.6654	899.72	174.524	1290.02	166.36	27.0851				0.246779	0.194765	0.0254788	-0.00678248	0.265849	0.456394	0.197081	0.0696312				208.056	148.713	1549.89	952.054	69.423	69.2812				0.030385	0.0838669	0.13144	-0.11669	0.244345	0.0633255	0.0727787	0.0485744
172	35.4771	859.245	165.793	1283.55	163.244	23.3064				0.240197	0.141017	-0.0258216	-0.0117662	0.242143	0.253209	0.13983	0.0528581				207.59	183.584	1444.21	957.366	65.2207	89.192				0.0280766	0.33802	0.0542966	-0.111761	0.169022	0.368916	0.141095	0.07653
173	44.4484	912.308	183.769	1265.51	184.556	30.9191				0.553812	0.211481	0.0798023	-0.0256526	0.404302	0.662552	0.314383	0.110736				208.57	189.802	1679.41	996.604	64.0552	79.1607				0.032933	0.383337	0.225995	-0.0753564	0.148132	0.214956	0.154999	0.0655196
174	36.8118	956.504	197.346	1285.75	182.28	18.5021				0.286855	0.270169	0.159579	-0.0100737	0.386986	-0.00512286	0.181399	0.0666322				190.747	161.52	1776.37	996.372	65.6851	59.1339				-0.0553345	0.177208	0.296775	-0.0755718	0.177346	-0.0924149	0.0713347	0.0677524
175	35.5098	899.112	171.433	1283.81	161.871	26.4894				0.24134	0.193957	0.00731474	-0.0115651	0.231693	0.424363	0.181184	0.0665461				196.358	160.837	1625.46	933.926	58.0897	89.7679				-0.0275483	0.172228	0.18661	-0.133509	0.0412055	0.377755	0.10279	0.073953
176	35.1569	899.147	171.356	1305.75	172.689	14.6426				0.229003	0.194004	0.00686289	0.0053247	0.314007	-0.212652	0.0894249	0.0787392				193.568	168.787	1537.92	973.021	71.4759	63.2277				-0.0413641	0.230174	0.122706	-0.097237	0.281141	-0.0295834	0.0776394	0.0640185
177	32.5582	919.084	168.649	1282.93	128.542	29.0298				0.138159	0.220479	-0.00904189	-0.0122448	-0.0219099	0.560963	0.146067	0.0922091				198.863	176.307	1497.43	963.205	63.9356	66.4107				-0.0151394	0.284981	0.0931427	-0.106344	0.145988	0.0192692	0.0703163	0.0558108
178	28.7294	894.972	180.856	1187.94	151.627	24.6298				0.00431279	0.18846	0.0626836	-0.0853806	0.153742	0.32437	0.108031	0.0593247				204.946	168.733	1233.05	991.699	62.7678	69.7946				0.0149838	0.229778	-0.0998555	-0.0799071	0.125056	0.0712052	0.0435434	0.0512223
179	35.3046	935.916	180.495	1264.2	147.409	19.4851				0.234166	0.242831	0.0605647	-0.0266617	0.121649	0.0477341	0.113381	0.0440173				209.464	200.941	1248.31	950.089	71.4345					0.037362	0.464519	-0.0887138	-0.118513	0.280399	-1	-0.0708244	0.207173
180	33.5725		191.736	1265.37	162.36	34.3872				0.173616	-1	0.126612	-0.0257635	0.235413	0.849035	0.0598188	0.245061				202.322	168.658	1344.37	982.167	67.8253					0.00198714	0.229236	-0.0185909	-0.0887514	0.215707	-1	-0.110069	0.185707
