# Supplementary material for: Hugin-AstA circuitry is a novel central energy sensor that directly regulates sweet sensation in Drosophila and mouse
Source: eLife. 2026 May 5;14:RP108551. doi: 10.7554/eLife.108551 (PMC13143273; doi:10.7554/eLife.108551)
Supplement: Figure 4—source data 1. [file elife-108551-fig4-data1.xlsx]

## Sheet: A
	6.25	12.5	25	50	100	200	400	800							6.25	12.5	25	50	100	200	400	800		Bonferroni's multiple comparisons test	95% confidence interval	P value	F (DFn, DFd)		Bonferroni's multiple comparisons test	95% confidence interval	P value	F (DFn, DFd)
/TRPA1-fed 20℃	0/10	0/10	0/10	0/10	0/10	0/10	3/10	8/10						/TRPA1-fed 20℃	0	0	0	0	0	0	0.3	0.8		ASTA/TRPA1-fed 20℃ vs. /TRPA1-fed 20℃	-0.03091 to 0.03091	>0.9999	F (14, 72) = 0.8571		Row 1			F (14, 72) = 0.8571
	0/10	0/10	0/10	0/10	0/10	1/10	4/10	7/10							0	0	0	0	0	0.1	0.4	0.7		ASTA/TRPA1-fed 20℃ vs. ASTA/-fed 20℃	-0.05591 to 0.005908	0.1364			ASTA/TRPA1-fed 20℃ vs. /TRPA1-fed 20℃	-0.08742 to 0.08742	>0.9999
	0/10	0/10	0/10	0/10	1/10	1/10	3/10	7/10							0	0	0	0	0.1	0.1	0.3	0.7							ASTA/TRPA1-fed 20℃ vs. ASTA/-fed 20℃	-0.08742 to 0.08742	>0.9999
	0/10	0/10	0/10	0/10	0/10	0/10	1/10	6/10							0	0	0	0	0	0	0.1	0.6							Row 2
																													ASTA/TRPA1-fed 20℃ vs. /TRPA1-fed 20℃	-0.08742 to 0.08742	>0.9999
														mean	0	0	0	0	0.025	0.05	0.275	0.7							ASTA/TRPA1-fed 20℃ vs. ASTA/-fed 20℃	-0.08742 to 0.08742	>0.9999
														SEM	0	0	0	0	0.025	0.0288675	0.0629153	0.0408248							Row 3
ASTA/TRPA1-fed 20℃	0/10	0/10	0/10	0/10	0/10	1/10	2/10	7/10						ASTA/TRPA1-fed 20℃	0	0	0	0	0	0.1	0.2	0.7							ASTA/TRPA1-fed 20℃ vs. /TRPA1-fed 20℃	-0.08742 to 0.08742	>0.9999
	0/10	0/10	0/10	0/10	1/10	2/10	4/10	6/10							0	0	0	0	0.1	0.2	0.4	0.6							ASTA/TRPA1-fed 20℃ vs. ASTA/-fed 20℃	-0.08742 to 0.08742	>0.9999
	0/10	0/10	0/10	0/10	0/10	1/10	4/10	6/10							0	0	0	0	0	0.1	0.4	0.6							Row 4
	0/10	0/10	0/10	0/10	0/10	0/10	2/10	6/10							0	0	0	0	0	0	0.2	0.6							ASTA/TRPA1-fed 20℃ vs. /TRPA1-fed 20℃	-0.08742 to 0.08742	>0.9999
																													ASTA/TRPA1-fed 20℃ vs. ASTA/-fed 20℃	-0.08742 to 0.08742	>0.9999
														mean	0	0	0	0	0.025	0.1	0.3	0.625							Row 5
														SEM	0	0	0	0	0.025	0.0408248	0.057735	0.025							ASTA/TRPA1-fed 20℃ vs. /TRPA1-fed 20℃	-0.08742 to 0.08742	>0.9999
ASTA/-fed 20℃	0/10	0/10	0/10	0/10	1/10	2/10	4/10	8/10						ASTA/-fed 20℃	0	0	0	0	0.1	0.2	0.4	0.8							ASTA/TRPA1-fed 20℃ vs. ASTA/-fed 20℃	-0.1124 to 0.06242	>0.9999
	0/10	0/10	0/10	0/10	0/10	1/10	3/10	7/10							0	0	0	0	0	0.1	0.3	0.7							Row 6
	0/10	0/10	0/10	0/10	0/10	1/10	4/10	6/10							0	0	0	0	0	0.1	0.4	0.6							ASTA/TRPA1-fed 20℃ vs. /TRPA1-fed 20℃	-0.03742 to 0.1374	0.3892
	0/10	0/10	0/10	0/10	1/10	2/10	3/10	7/10							0	0	0	0	0.1	0.2	0.3	0.7							ASTA/TRPA1-fed 20℃ vs. ASTA/-fed 20℃	-0.1374 to 0.03742	0.3892
																													Row 7
														mean	0	0	0	0	0.05	0.15	0.35	0.7							ASTA/TRPA1-fed 20℃ vs. /TRPA1-fed 20℃	-0.06242 to 0.1124	>0.9999
														SEM	0	0	0	0	0.0288675	0.0288675	0.0288675	0.0408248							ASTA/TRPA1-fed 20℃ vs. ASTA/-fed 20℃	-0.1374 to 0.03742	0.3892
																													Row 8
																													ASTA/TRPA1-fed 20℃ vs. /TRPA1-fed 20℃	-0.1624 to 0.01242	0.1068
																													ASTA/TRPA1-fed 20℃ vs. ASTA/-fed 20℃	-0.1624 to 0.01242	0.1068
	6.25	12.5	25	50	100	200	400	800							6.25	12.5	25	50	100	200	400	800			Bonferroni's multiple comparisons test	95% confidence interval	P value	F (DFn, DFd)	Bonferroni's multiple comparisons test	95% confidence interval	P value	F (DFn, DFd)
W/TRPA1-fed 30℃	0/10	0/10	0/10	0/10	0/10	2/10	4/10	8/10						/TRPA1-fed 30℃	0	0	0	0	0	0.2	0.4	0.8			ASTA/TRPA1-fed 30℃ vs. /TRPA1-fed 30℃	-0.1868 to -0.1382	<0.0001	F (14, 72) = 46.77	Row 1			F (14, 72) = 46.77
	0/10	0/10	0/10	0/10	0/10	2/10	5/10	9/10							0	0	0	0	0	0.2	0.5	0.9			ASTA/TRPA1-fed 30℃ vs. ASTA/-fed 30℃	-0.1962 to -0.1476	<0.0001		ASTA/TRPA1-fed 30℃ vs. /TRPA1-fed 30℃	-0.06878 to 0.06878	>0.9999
	0/10	0/10	0/10	0/10	1/10	2/10	6/10	8/10							0	0	0	0	0.1	0.2	0.6	0.8							ASTA/TRPA1-fed 30℃ vs. ASTA/-fed 30℃	-0.06878 to 0.06878	>0.9999
	0/10	0/10	0/10	0/10	0/10	1/10	4/10	9/10							0	0	0	0	0	0.1	0.4	0.9							Row 2
																													ASTA/TRPA1-fed 30℃ vs. /TRPA1-fed 30℃	-0.06878 to 0.06878	>0.9999
														mean	0	0	0	0	0.025	0.175	0.475	0.85							ASTA/TRPA1-fed 30℃ vs. ASTA/-fed 30℃	-0.06878 to 0.06878	>0.9999
														SEM	0	0	0	0	0.025	0.025	0.0478714	0.0288675							Row 3
ASTA/TRPA1-fed 30℃	0/10	0/10	0/10	0/10	0/10	0/10	1/10	2/10						ASTA/TRPA1-fed 30℃	0	0	0	0	0	0	0.1	0.2							ASTA/TRPA1-fed 30℃ vs. /TRPA1-fed 30℃	-0.06878 to 0.06878	>0.9999
	0/10	0/10	0/10	0/10	0/10	0/10	0/10	2/10							0	0	0	0	0	0	0	0.2							ASTA/TRPA1-fed 30℃ vs. ASTA/-fed 30℃	-0.06878 to 0.06878	>0.9999
	0/10	0/10	0/10	0/10	0/10	0/10	0/10	1/10							0	0	0	0	0	0	0	0.1							Row 4
	0/10	0/10	0/10	0/10	0/10	0/10	1/10	2/10							0	0	0	0	0	0	0.1	0.2							ASTA/TRPA1-fed 30℃ vs. /TRPA1-fed 30℃	-0.06878 to 0.06878	>0.9999
																													ASTA/TRPA1-fed 30℃ vs. ASTA/-fed 30℃	-0.06878 to 0.06878	>0.9999
														mean	0	0	0	0	0	0	0.05	0.175							Row 5
														SEM	0	0	0	0	0	0	0.0288675	0.025							ASTA/TRPA1-fed 30℃ vs. /TRPA1-fed 30℃	-0.09378 to 0.04378	0.8163
ASTA/w1118-fed 30℃	0/10	0/10	0/10	0/10	0/10	2/10	6/10	8/10						ASTA/-fed 30℃	0	0	0	0	0	0.2	0.6	0.8							ASTA/TRPA1-fed 30℃ vs. ASTA/-fed 30℃	-0.1188 to 0.01878	0.2009
	0/10	0/10	0/10	0/10	1/10	3/10	5/10	8/10							0	0	0	0	0.1	0.3	0.5	0.8							Row 6
	0/10	0/10	0/10	0/10	0/10	3/10	5/10	9/10							0	0	0	0	0	0.3	0.5	0.9							ASTA/TRPA1-fed 30℃ vs. /TRPA1-fed 30℃	-0.2438 to -0.1062	<0.0001
	0/10	0/10	0/10	0/10	1/10	2/10	4/10	7/10							0	0	0	0	0.1	0.2	0.4	0.7							ASTA/TRPA1-fed 30℃ vs. ASTA/-fed 30℃	-0.3188 to -0.1812	<0.0001
																													Row 7
														mean	0	0	0	0	0.05	0.25	0.5	0.8							ASTA/TRPA1-fed 30℃ vs. /TRPA1-fed 30℃	-0.4938 to -0.3562	<0.0001
														SEM	0	0	0	0	0.0288675	0.0288675	0.0408248	0.0408248							ASTA/TRPA1-fed 30℃ vs. ASTA/-fed 30℃	-0.5188 to -0.3812	<0.0001
																													Row 8
																													ASTA/TRPA1-fed 30℃ vs. /TRPA1-fed 30℃	-0.7438 to -0.6062	<0.0001
																													ASTA/TRPA1-fed 30℃ vs. ASTA/-fed 30℃	-0.6938 to -0.5562	<0.0001

## Sheet: B
	6.25	12.5	25	50	100	200	400	800							6.25	12.5	25	50	100	200	400	800		Bonferroni's multiple comparisons test	95% confidence interval	P value	F (DFn, DFd)		Bonferroni's multiple comparisons test	95% confidence interval	P value	F (DFn, DFd)
W/TRPA1-ST12h 20℃	0/10	0/10	0/10	1/10	1/10	3/10	8/10	10/10						/TRPA1-ST12h 20℃	0	0	0	0.1	0.1	0.3	0.8	1		ASTA/TRPA1-ST12h 20℃ vs. /TRPA1-ST12h 20℃	-0.07452 to -0.006733	0.0153	F (14, 72) = 0.9208		Row 1			F (14, 72) = 0.9208
	0/10	0/10	0/10	2/10	1/10	2/10	8/10	10/10							0	0	0	0.2	0.1	0.2	0.8	1		ASTA/TRPA1-ST12h 20℃ vs. ASTA/-ST12h 20℃	-0.05577 to 0.01202	0.2878			ASTA/TRPA1-ST12h 20℃ vs. /TRPA1-ST12h 20℃	-0.09586 to 0.09586	>0.9999
	0/10	0/10	0/10	0/10	0/10	3/10	7/10	10/10							0	0	0	0	0	0.3	0.7	1							ASTA/TRPA1-ST12h 20℃ vs. ASTA/-ST12h 20℃	-0.09586 to 0.09586	>0.9999
	0/10	0/10	0/10	1/10	3/10	4/10	8/10	10/10							0	0	0	0.1	0.3	0.4	0.8	1							Row 2
																													ASTA/TRPA1-ST12h 20℃ vs. /TRPA1-ST12h 20℃	-0.09586 to 0.09586	>0.9999
														mean	0	0	0	0.1	0.125	0.3	0.775	1							ASTA/TRPA1-ST12h 20℃ vs. ASTA/-ST12h 20℃	-0.09586 to 0.09586	>0.9999
														SEM	0	0	0	0.0408248	0.0629153	0.0408248	0.025	0							Row 3
ASTA/TRPA1-ST12h 20℃	0/10	0/10	0/10	0/10	0/10	2/10	6/10	10/10						ASTA/TRPA1-ST12h 20℃	0	0	0	0	0	0.2	0.6	1							ASTA/TRPA1-ST12h 20℃ vs. /TRPA1-ST12h 20℃	-0.09586 to 0.09586	>0.9999
	0/10	0/10	0/10	1/10	1/10	2/10	6/10	10/10							0	0	0	0.1	0.1	0.2	0.6	1							ASTA/TRPA1-ST12h 20℃ vs. ASTA/-ST12h 20℃	-0.09586 to 0.09586	>0.9999
	0/10	0/10	0/10	1/10	1/10	2/10	5/10	10/10							0	0	0	0.1	0.1	0.2	0.5	1							Row 4
	0/10	0/10	0/10	0/10	1/10	3/10	8/10	10/10							0	0	0	0	0.1	0.3	0.8	1							ASTA/TRPA1-ST12h 20℃ vs. /TRPA1-ST12h 20℃	-0.1459 to 0.04586	0.4728
																													ASTA/TRPA1-ST12h 20℃ vs. ASTA/-ST12h 20℃	-0.1459 to 0.04586	0.4728
														mean	0	0	0	0.05	0.075	0.225	0.625	1							Row 5
														SEM	0	0	0	0.0288675	0.025	0.025	0.0629153	0							ASTA/TRPA1-ST12h 20℃ vs. /TRPA1-ST12h 20℃	-0.1459 to 0.04586	0.4728
ASTA/w1118-ST12h 20℃	0/10	0/10	0/10	1/10	2/10	3/10	7/10	10/10						ASTA/-ST12h 20℃	0	0	0	0.1	0.2	0.3	0.7	1							ASTA/TRPA1-ST12h 20℃ vs. ASTA/-ST12h 20℃	-0.1459 to 0.04586	0.4728
	0/10	0/10	0/10	1/10	1/10	3/10	6/10	10/10							0	0	0	0.1	0.1	0.3	0.6	1							Row 6
	0/10	0/10	0/10	0/10	0/10	2/10	8/10	10/10							0	0	0	0	0	0.2	0.8	1							ASTA/TRPA1-ST12h 20℃ vs. /TRPA1-ST12h 20℃	-0.1709 to 0.02086	0.155
	0/10	0/10	0/10	2/10	2/10	2/10	6/10	10/10							0	0	0	0.2	0.2	0.2	0.6	1							ASTA/TRPA1-ST12h 20℃ vs. ASTA/-ST12h 20℃	-0.1209 to 0.07086	>0.9999
																													Row 7
														mean	0	0	0	0.1	0.125	0.25	0.675	1							ASTA/TRPA1-ST12h 20℃ vs. /TRPA1-ST12h 20℃	-0.2459 to -0.05414	0.0012
														SEM	0	0	0	0.0408248	0.0478714	0.0288675	0.0478714	0							ASTA/TRPA1-ST12h 20℃ vs. ASTA/-ST12h 20℃	-0.1459 to 0.04586	0.4728
																													Row 8
																													ASTA/TRPA1-ST12h 20℃ vs. /TRPA1-ST12h 20℃	-0.09586 to 0.09586	>0.9999
																													ASTA/TRPA1-ST12h 20℃ vs. ASTA/-ST12h 20℃	-0.09586 to 0.09586	>0.9999
	6.25	12.5	25	50	100	200	400	800							6.25	12.5	25	50	100	200	400	800		Bonferroni's multiple comparisons test	95% confidence interval	P value	F (DFn, DFd)		Bonferroni's multiple comparisons test	95% confidence interval	P value	F (DFn, DFd)
W/TRPA1-ST12h 30℃	0/10	0/10	0/10	0/10	1/10	4/10	7/10	10/10						/TRPA1-ST12h 30℃	0	0	0	0	0.1	0.4	0.7	1		ASTA/TRPA1-ST12h 30℃ vs. /TRPA1-ST12h 30℃	-0.2611 to -0.1827	<0.0001	F (14, 72) = 21.11		Row 1			F (14, 72) = 21.11
	0/10	0/10	0/10	0/10	1/10	6/10	7/10	9/10							0	0	0	0	0.1	0.6	0.7	0.9		ASTA/TRPA1-ST12h 30℃ vs. ASTA/-ST12h 30℃	-0.2704 to -0.1921	<0.0001			ASTA/TRPA1-ST12h 30℃ vs. /TRPA1-ST12h 30℃	-0.1108 to 0.1108	>0.9999
	0/10	0/10	0/10	1/10	2/10	6/10	10/10	10/10							0	0	0	0.1	0.2	0.6	1	1							ASTA/TRPA1-ST12h 30℃ vs. ASTA/-ST12h 30℃	-0.1108 to 0.1108	>0.9999
	0/10	0/10	0/10	0/10	1/10	4/10	8/10	10/10							0	0	0	0	0.1	0.4	0.8	1							Row 2
																													ASTA/TRPA1-ST12h 30℃ vs. /TRPA1-ST12h 30℃	-0.1108 to 0.1108	>0.9999
														mean	0	0	0	0.025	0.125	0.5	0.8	0.975							ASTA/TRPA1-ST12h 30℃ vs. ASTA/-ST12h 30℃	-0.1108 to 0.1108	>0.9999
														SEM	0	0	0	0.025	0.025	0.057735	0.0707107	0.025							Row 3
ASTA/TRPA1-ST12h 30℃	0/10	0/10	0/10	0/10	0/10	0/10	1/10	3/10						ASTA/TRPA1-ST12h 30℃	0	0	0	0	0	0	0.1	0.3							ASTA/TRPA1-ST12h 30℃ vs. /TRPA1-ST12h 30℃	-0.1108 to 0.1108	>0.9999
	0/10	0/10	0/10	0/10	0/10	0/10	1/10	6/10							0	0	0	0	0	0	0.1	0.6							ASTA/TRPA1-ST12h 30℃ vs. ASTA/-ST12h 30℃	-0.1108 to 0.1108	>0.9999
	0/10	0/10	0/10	0/10	0/10	1/10	2/10	4/10							0	0	0	0	0	0.1	0.2	0.4							Row 4
	0/10	0/10	0/10	0/10	0/10	1/10	2/10	5/10							0	0	0	0	0	0.1	0.2	0.5							ASTA/TRPA1-ST12h 30℃ vs. /TRPA1-ST12h 30℃	-0.1358 to 0.08583	>0.9999
																													ASTA/TRPA1-ST12h 30℃ vs. ASTA/-ST12h 30℃	-0.2108 to 0.01083	0.0849
														mean	0	0	0	0	0	0.05	0.15	0.45							Row 5
														SEM	0	0	0	0	0	0.0288675	0.0288675	0.0645497							ASTA/TRPA1-ST12h 30℃ vs. /TRPA1-ST12h 30℃	-0.2358 to -0.01417	0.0237
ASTA/w1118-ST12h 30℃	0/10	0/10	0/10	0/10	0/10	3/10	7/10	10/10						ASTA/-ST12h 30℃	0	0	0	0	0	0.3	0.7	1							ASTA/TRPA1-ST12h 30℃ vs. ASTA/-ST12h 30℃	-0.2608 to -0.03917	0.0055
	0/10	0/10	0/10	1/10	1/10	4/10	9/10	10/10							0	0	0	0.1	0.1	0.4	0.9	1							Row 6
	0/10	0/10	0/10	2/10	3/10	4/10	9/10	10/10							0	0	0	0.2	0.3	0.4	0.9	1							ASTA/TRPA1-ST12h 30℃ vs. /TRPA1-ST12h 30℃	-0.5608 to -0.3392	<0.0001
	0/10	0/10	0/10	1/10	2/10	6/10	8/10	10/10							0	0	0	0.1	0.2	0.6	0.8	1							ASTA/TRPA1-ST12h 30℃ vs. ASTA/-ST12h 30℃	-0.4858 to -0.2642	<0.0001
																													Row 7
														mean	0	0	0	0.1	0.15	0.425	0.825	1							ASTA/TRPA1-ST12h 30℃ vs. /TRPA1-ST12h 30℃	-0.7608 to -0.5392	<0.0001
														SEM	0	0	0	0.0408248	0.0645497	0.0629153	0.0478714	0							ASTA/TRPA1-ST12h 30℃ vs. ASTA/-ST12h 30℃	-0.7858 to -0.5642	<0.0001
																													Row 8
																													ASTA/TRPA1-ST12h 30℃ vs. /TRPA1-ST12h 30℃	-0.6358 to -0.4142	<0.0001
																													ASTA/TRPA1-ST12h 30℃ vs. ASTA/-ST12h 30℃	-0.6608 to -0.4392	<0.0001

## Sheet: D
	ASTA/GC6m；hugin/chrimson.oir	ASTA/GC6m；hugin/chrimson_0001.oir	ASTA/GC6m；hugin/chrimson_0002.oir	ASTA/GC6m；hugin/chrimson_0003.oir	ASTA/GC6m；hugin/chrimson_0004.oir	ASTA/GC6m；hugin/chrimson_0005.oir				ASTA/GC6m；hugin/chrimson.oir	ASTA/GC6m；hugin/chrimson_0001.oir	ASTA/GC6m；hugin/chrimson_0002.oir	ASTA/GC6m；hugin/chrimson_0003.oir	ASTA/GC6m；hugin/chrimson_0004.oir	ASTA/GC6m；hugin/chrimson_0005.oir						ASTA/GC6m；hugin/.oir	ASTA/GC6m；hugin/_0001.oir	ASTA/GC6m；hugin/_0003.oir	ASTA/GC6m；hugin/_0004.oir	ASTA/GC6m；hugin/_0005.oir	ASTA/GC6m；hugin/_0006.oir				ASTA/GC6m；hugin/.oir	ASTA/GC6m；hugin/_0001.oir	ASTA/GC6m；hugin/_0003.oir	ASTA/GC6m；hugin/_0004.oir	ASTA/GC6m；hugin/_0005.oir	ASTA/GC6m；hugin/_0006.oir							Peak
time（sec）	raw data	raw data	raw data	raw data	raw data	raw data				F/F0	F/F0	F/F0	F/F0	F/F0	F/F0	mean	SEM				raw data	raw data	raw data	raw data	raw data	raw data				F/F0	F/F0	F/F0	F/F0	F/F0	F/F0	mean	SEM					ASTA/GC6m；hugin/	ASTA/GC6m；hugin/chrimson
0	205.482	142.586	277.449	93.7919	36.7335	60.8441				-0.473797	-0.0581756	-0.0688985	-0.0643524	-0.209364	-0.0855798	-0.160028	0.0668979				97.6214	57.9373	73.575	115.388	63.8821	18.3494				-0.0425701	-0.0628243	-0.390341	-0.0504836	0.129281	-0.00930831	-0.0710411	0.0700459					0.631287	3.3634
1	251.794	121.912	269.221	98.638	46.5176	71.9301				-0.355202	-0.194736	-0.0965109	-0.0160088	0.00122501	0.0810306	-0.0967003	0.0643228				89.0905	56.5451	83.4641	91.4137	61.8275	19.902				-0.126238	-0.0853441	-0.308398	-0.247769	0.0929603	0.0745172	-0.100045	0.0667978					0.533835	1.39745
2	274.256	152.609	299.022	109.787	46.8767	61.9355				-0.29768	0.00803134	0.00350127	0.0952142	0.00895413	-0.0691772	-0.0418593	0.05541				104.831	74.3922	93.09	117.748	62.9061	15.6222				0.0281416	0.203345	-0.228635	-0.031066	0.112027	-0.156551	-0.012123	0.0662211					1.02308	0.431655
3	242.824	116.33	310.154	106.538	31.3877	38.5591				-0.378172	-0.231603	0.0408606	0.0628049	-0.324425	-0.420499	-0.208506	0.0863117				111.593	59.3647	98.5327	112.935	57.7314	30.3054				0.0944536	-0.0397351	-0.183536	-0.0706715	0.0205512	0.636201	0.0762106	0.118252					0.388191	3.06109
4	301.337	144.019	303.809	101.466	48.0507	66.3333				-0.228332	-0.0487129	0.0195652	0.0122037	0.0342228	-0.00308313	-0.0356894	0.0402403				116.93	67.0588	106.643	113.939	48.5109	16.6918				0.146801	0.0847223	-0.116331	-0.0624122	-0.142445	-0.0988028	-0.0314114	0.0484042					0.696199	5.46665
5	224.402	140.907	318.316	99.8552	49.9119	82.6505				-0.425347	-0.069266	0.0682512	-0.00386628	0.0742825	0.242147	-0.0189666	0.0917217				98.7243	67.3137	93.8226	125.975	58.6616	17.7457				-0.0317533	0.0888455	-0.222565	0.0366296	0.0369948	-0.0419023	-0.0222918	0.0446921					0.207037	5.37613
6	252.829	142.73	288.154	84.2986	40.4273	82.3011				-0.352551	-0.0572232	-0.0329701	-0.159056	-0.12986	0.236895	-0.0824607	0.078769				102.712	62.451	111.273	103.522	47.7183	17.8935				0.00735539	0.0101879	-0.0779686	-0.148135	-0.156456	-0.0339225	-0.0664898	0.0301578				Mean	0.579938	3.18273
7	265.015	147.149	297.728	76.5611	43	81.4086				-0.321345	-0.0280369	-0.000841995	-0.236243	-0.0744863	0.223482	-0.0729118	0.0781997				74.9259	49.1961	105.711	129.763	48.321	23.6634				-0.265158	-0.204219	-0.124054	0.0677989	-0.145802	0.277597	-0.0656396	0.0825565				SEM	0.114087	0.833274
8	229.04	154.549	321.125	100.665	41.7819	73.3763				-0.41347	0.0208423	0.0776774	0.0042141	-0.100704	0.102765	-0.0514458	0.0779456				94.3457	70.4588	100.804	117.245	53.7511	24.7415				-0.0746968	0.13972	-0.164712	-0.03521	-0.0498109	0.335804	0.0251823	0.0741421
9	269.342	137.874	292.676	88.4842	43.8877	63.7366				-0.310265	-0.0892972	-0.0177942	-0.117301	-0.0553798	-0.0421087	-0.105358	0.0434178				83.0576	55.7843	92.1699	124.09	46.8843	20.4645				-0.185406	-0.0976505	-0.236259	0.021119	-0.171199	0.104887	-0.0940849	0.0539673
10	288.638	127.939	273.382	87.267	34.0727	63.9839				-0.26085	-0.15492	-0.0825441	-0.129443	-0.266634	-0.038392	-0.155464	0.0379322				87.5761	52.7725	99.2101	105.698	44.6703	17.9176				-0.14109	-0.146368	-0.177923	-0.130227	-0.210337	-0.0326214	-0.139761	0.0245306
11	282.668	141.981	291.213	89.9231	44.4009	60.3495				-0.276138	-0.0621692	-0.022705	-0.102947	-0.0443339	-0.0930131	-0.100218	0.0372318				70.1687	59.0431	109.395	102.417	55.0699	20.2614				-0.311815	-0.0449372	-0.0935284	-0.157222	-0.0264977	0.0939214	-0.0900131	0.0558639				P value	0.0114
12	271.372	159.409	280.949	86.6154	41.5837	67.9355				-0.305066	0.0529474	-0.0571527	-0.135944	-0.10497	0.0209962	-0.0881982	0.0524093				67.1934	53.3412	105.406	114.881	50.8362	24.0298				-0.340995	-0.137169	-0.126581	-0.0546573	-0.101339	0.297379	-0.0772271	0.0850535				95% confidence interval	0.7288 to 4.477
13	305.457	161.526	311.868	98.7059	47.4383	52.9032				-0.21778	0.0669262	0.04661	-0.0153314	0.0210418	-0.204923	-0.050576	0.0520907				75.0494	63.0431	108.929	116.335	57.0022	19.0241				-0.263947	0.0197656	-0.0973923	-0.0426991	0.00766067	0.027119	-0.0582488	0.0453886				F, DFn, Dfd	53.35, 5, 5
14	301.538	151.358	297.485	109.05	47.4736	54.5215				-0.227817	-0.000233222	-0.00165615	0.087857	0.0218016	-0.180602	-0.0501082	0.0508755				75.7325	86.9686	105.064	139.565	50.6332	16.3111				-0.257247	0.406777	-0.129414	0.148459	-0.104928	-0.119357	-0.00928493	0.0991918
15	318.603	149.577	333.699	95.991	37.6255	62.0968				-0.184116	-0.0119993	0.119873	-0.0424147	-0.190165	-0.0667531	-0.0625957	0.0473711				73.7366	61.7216	118.65	121.165	54.8777	16.3935				-0.276822	-0.00161061	-0.0168386	-0.00294545	-0.0298953	-0.114908	-0.0738367	0.0440877
16	309.226	129.465	295.853	95.0498	38.163	80.8333				-0.208128	-0.144843	-0.00713439	-0.0518039	-0.178596	0.214836	-0.0626116	0.0636556				87.3621	71.6	120.827	129.91	59.0808	14.8395				-0.143189	0.158179	0.00119886	0.0690127	0.0444053	-0.198809	-0.0115337	0.0550717
17	327.467	166.577	328.926	77.6063	43.4295	84.8118				-0.161416	0.100291	0.103859	-0.225816	-0.0652419	0.274628	0.00438395	0.0769102				103.51	66.3647	122.853	102.385	54.6943	14.348				0.0151858	0.0734947	0.0179892	-0.157488	-0.0331374	-0.225346	-0.0515503	0.0471496
18	287.94	165.781	289.993	93.2398	43.9339	73.328				-0.262639	0.0950371	-0.0268012	-0.0698601	-0.0543854	0.10204	-0.0361015	0.054516				95.8272	55.3961	145.848	108.942	53.2838	23.0455				-0.0601669	-0.10393	0.208532	-0.103528	-0.0580716	0.244236	0.0211786	0.0655635
19	314.211	152.73	339.919	90.2081	50.7797	69.4194				-0.195363	0.00882992	0.140749	-0.100104	0.0929606	0.0432976	-0.00160484	0.0511783				80.3827	64.0353	143.743	114.007	47.3253	20.9134				-0.21164	0.0358151	0.191089	-0.0618501	-0.163403	0.129123	-0.0134777	0.0654977
20	330.719	181.93	333.162	80.6833	46.5022	60.5323				-0.15309	0.201705	0.118072	-0.195121	0.000893551	-0.0902658	-0.0196344	0.0637627				71.7407	58.098	159.183	108.004	45.4345	21.1946				-0.296397	-0.0602248	0.319024	-0.111253	-0.196828	0.144305	-0.0335624	0.0928149
21	247.111	144.679	329.574	97.5204	33.5969	91.3925				-0.367195	-0.0443501	0.10603	-0.0271577	-0.276875	0.373529	-0.0393364	0.108885				87.0412	67.898	139.912	102.957	48.8908	23.4957				-0.146336	0.0982969	0.159339	-0.152782	-0.135729	0.268543	0.0152218	0.0750456
22	323.337	158.377	303.316	103.041	36.141	74.3763				-0.171994	0.0461268	0.017912	0.0279116	-0.222117	0.117794	-0.0307276	0.0548804				86.2263	56	138.306	106.558	54.4061	17.5057				-0.154328	-0.0941614	0.146035	-0.123152	-0.0382321	-0.05486	-0.0531165	0.0434815
23	357.291	150.619	326.824	95.2715	41.9736	80.0269				-0.085042	-0.00511785	0.0968012	-0.0495923	-0.0965781	0.202717	0.0105313	0.0479041				91.9095	53.7176	128.121	109.719	55.524	16.8707				-0.09859	-0.131081	0.0616361	-0.0971339	-0.0184703	-0.0891439	-0.0621305	0.0290188
24	350.402	158.661	300.654	108.294	58.8238	89.2634				-0.102685	0.0480014	0.00897917	0.0803183	0.266098	0.341531	0.107041	0.0678443				99.0041	56.7529	129.442	108.119	55.7358	17.0881				-0.0290092	-0.0819828	0.0725863	-0.110306	-0.0147262	-0.0774064	-0.0401407	0.0267954
25	384.382	159.549	282.404	82.9864	35.478	76.0484				-0.0156682	0.0538689	-0.0522668	-0.172146	-0.236387	0.142924	-0.0466124	0.0573826				105.885	69.0667	116.993	116.388	47.9258	19.3835				0.0384739	0.117201	-0.0305738	-0.0422547	-0.152788	0.0465232	-0.00390303	0.0380148
26	368.854	143.549	304.147	87.3258	45.0595	67.1237				-0.0554315	-0.051816	0.0207005	-0.128857	-0.0301585	0.00879572	-0.0394611	0.0219347				118.3	49.0745	126.236	135.058	49.7642	20.3452				0.160241	-0.206186	0.0460224	0.111371	-0.12029	0.0984458	0.014934	0.0593112
27	340.271	150.888	253.448	108.611	48.6145	76.543				-0.128627	-0.00333574	-0.149441	0.0834787	0.0463578	0.150357	-0.000201678	0.0485158				110.93	70.7373	109.689	139.13	50.1332	20.3565				0.0879551	0.144225	-0.0910956	0.144878	-0.113767	0.0990559	0.0452085	0.0477203
28	369.935	135.921	257.721	104.376	37.6982	67.1936				-0.0526648	-0.102201	-0.135104	0.0412282	-0.1886	0.00984624	-0.0712492	0.0357676				111.901	59.1373	125.502	119.331	46.7162	23.2557				0.0974802	-0.0434134	0.0399345	-0.0180421	-0.174171	0.255585	0.0262288	0.0591154
29	386.241	154.233	290.14	102.733	45.0529	92.0538				-0.0109069	0.0187537	-0.0263076	0.024842	-0.0303006	0.383468	0.0599248	0.0653707				115.864	61.4941	108.363	146.417	41.1114	19.7429				0.136348	-0.00529058	-0.102081	0.204848	-0.27325	0.0659273	0.00441683	0.0706864
30	345.759	140.828	287.485	90.3439	43.0132	91.672				-0.114575	-0.0697884	-0.0352156	-0.0987489	-0.0742022	0.37773	-0.00246671	0.0768415				111.901	71.4431	108.742	123.331	54.4585	17.4531				0.0974802	0.155641	-0.0989377	0.0148733	-0.0373058	-0.0576999	0.0123419	0.0398094
31	406.638	159.977	310.926	104.778	41.7115	84.2581				0.0413261	0.0566953	0.0434518	0.0452455	-0.102219	0.266307	0.0584677	0.0482061				113.947	58.5294	121.855	145.684	47.2969	20.6491				0.11754	-0.0532466	0.00971628	0.19881	-0.163906	0.114853	0.0372945	0.0541546
32	415.935	147.87	290.61	110.593	60.5815	57.3064				0.0651328	-0.0232745	-0.0247283	0.10325	0.30393	-0.138748	0.0475938	0.0616683				118.325	53.1804	110.28	150.759	46.5393	16.5014				0.160483	-0.13977	-0.0861976	0.240575	-0.177298	-0.109083	-0.0185483	0.0711493
33	487.02	139.647	310.956	101.624	45.315	64.4893				0.247169	-0.0775919	0.0435504	0.0137829	-0.0246592	-0.0307964	0.0285759	0.0468533				107.198	60.3529	116.009	136.417	44.6026	14.4247				0.0513483	-0.0237503	-0.0387267	0.12256	-0.211534	-0.221204	-0.0535513	0.0566254
34	473.136	150.256	296.044	91.3122	47.152	81.4086				0.211614	-0.00751425	-0.00649273	-0.0890894	0.0148796	0.223482	0.0578132	0.0525761				119.086	57.2157	83.0477	149.086	48.869	17.9972				0.16795	-0.0744966	-0.311848	0.226811	-0.136115	-0.0283237	-0.0260037	0.0811832
35	456.211	137.963	308.537	94.9321	52.7313	64.7742				0.168273	-0.0887133	0.0354321	-0.0529781	0.134966	-0.0265147	0.0284109	0.0425534				104.626	55.9843	92.3548	129.701	43.8996	14.2841				0.0261232	-0.0944154	-0.234727	0.0672953	-0.223962	-0.228796	-0.114747	0.055596
36	426.874	158.442	311.235	91.1176	42.9868	61.1936				0.0931473	0.0465575	0.0444881	-0.0910307	-0.0747704	-0.0803272	-0.0103226	0.0329209				98.6831	58.9294	87.1945	124.23	47.1834	15.7798				-0.0321574	-0.0467764	-0.277487	0.0222735	-0.165912	-0.148042	-0.108017	0.0447789
37	476.312	143.879	315.919	118.688	38.1013	65.8763				0.219747	-0.0496343	0.0602066	0.184004	-0.179924	-0.00995134	0.037408	0.0611855				103.638	47.7725	97.5654	116.982	40.9563	15.1733				0.0164372	-0.227247	-0.191551	-0.0373709	-0.275992	-0.180787	-0.149418	0.0465117
38	435.317	164.623	263.404	97.5837	40.6828	43.9839				0.114766	0.0873875	-0.11603	-0.0265263	-0.124361	-0.33897	-0.0672889	0.067866				87.0535	56.4941	111.258	130.36	55.0786	17.5				-0.146216	-0.086169	-0.0780928	0.0727124	-0.0263439	-0.0551678	-0.0532128	0.0299653
39	446.307	148.526	273.346	102.199	50.0198	38.4785				0.142909	-0.0189428	-0.0826676	0.019516	0.0766049	-0.42171	-0.0473817	0.0812885				108.453	54.5333	132.408	137.651	50.155	12.1307				0.0636588	-0.117886	0.0971658	0.132712	-0.113381	-0.345058	-0.0471315	0.0738457
40	529.764	139.386	291.118	115.394	51.3172	71.5753				0.356628	-0.0793126	-0.0230258	0.151142	0.10453	0.0756984	0.09761	0.0622733				94.1646	56.8274	138.826	127.36	50.2052	16.1662				-0.076473	-0.0807777	0.150347	0.0480258	-0.112494	-0.12718	-0.033092	0.0445507
41	470.367	156.614	323.699	114.425	37.0154	61.3387				0.204523	0.0344836	0.0863139	0.141482	-0.203296	-0.0781465	0.0308933	0.0611545				111.951	64.7059	140.927	129.119	61.369	16.733				0.0979647	0.0466625	0.167749	0.0625004	0.0848551	-0.0965784	0.0605256	0.0357623
42	483.97	171.367	295.934	105.19	43.0683	69.9247				0.239358	0.131934	-0.00686289	0.0493525	-0.0730163	0.0508917	0.0652763	0.0445485				117.975	56.9765	155.581	149.54	66.8821	14.9418				0.157052	-0.0783659	0.289178	0.230541	0.182313	-0.193286	0.0979056	0.0776025
43	466.437	143.335	306.221	104.864	47.2445	62.5806				0.19446	-0.0532289	0.027659	0.0461034	0.0168705	-0.0594821	0.0287304	0.0375982				104.605	52.9843	170.744	141.986	76.6201	14.9375				0.0259211	-0.142942	0.414826	0.16838	0.354458	-0.193518	0.104521	0.103131
44	523.804	160.977	306.632	122.683	38.489	60.371				0.341366	0.0633006	0.029041	0.223862	-0.171579	-0.09269	0.0655501	0.0782614				113.588	64.4196	165.755	143.788	95.1376	21.0526				0.114029	0.0420314	0.373484	0.18321	0.681802	0.136639	0.255199	0.0967109
45	569.261	151.907	314.779	109.719	47.967	71.9946				0.457774	0.00339243	0.0563819	0.0945378	0.0324213	0.082	0.121085	0.0686759				119.811	63.6902	154.088	122.932	92.9083	14.3991				0.175053	0.0302328	0.276811	0.0115884	0.642393	-0.222587	0.152249	0.119924
46	522.432	157.214	321.713	123.629	59.4802	54.7204				0.337853	0.0384468	0.0796513	0.233296	0.280226	-0.177612	0.131977	0.0778802				113.457	62.8941	158.094	133.241	97.0524	17.044				0.112737	0.0173554	0.310001	0.0964222	0.715651	-0.0797874	0.195396	0.116598
47	558.915	152.521	325.184	105.511	44.8612	60.9409				0.431278	0.00744743	0.0912985	0.0525577	-0.0344266	-0.084125	0.0773384	0.0751729				115.556	53.0196	177.044	125.457	94.3886	20.8253				0.133321	-0.142371	0.467031	0.0323671	0.668562	0.124367	0.213879	0.121817
48	563	141.205	292.566	115.756	60.7401	58.7473				0.44174	-0.0672996	-0.0181644	0.154754	0.307344	-0.117092	0.11688	0.091314				113.996	66.4941	183.186	128.201	79.4476	18.5312				0.118024	0.0755879	0.51792	0.054952	0.404441	0.00050715	0.195239	0.0867503
49	552.789	176.781	312.022	121.633	59.5617	59.7581				0.415591	0.167695	0.0471285	0.213389	0.281981	-0.101901	0.170647	0.0738846				103.156	68.0784	170.195	127	70.631	15.179				0.0117149	0.101215	0.41027	0.0450659	0.248585	-0.18048	0.106062	0.0831879
50	553.166	137.981	324.441	102.48	55.4449	71.4086				0.416557	-0.0885904	0.0888063	0.0223142	0.193372	0.0731931	0.117609	0.0705954				93.7984	56.3059	160.141	120.381	66.0393	18.9645				-0.0800645	-0.0892133	0.326964	-0.00939853	0.167415	0.0239012	0.0566005	0.0660152
51	529.693	148.047	288.147	111.493	52.8987	48.8656				0.356448	-0.0221074	-0.0329946	0.112232	0.138569	-0.265604	0.0477573	0.085106				81.7119	78.8078	144.651	115.234	67.8886	21.1307				-0.198604	0.27477	0.198607	-0.0517566	0.200106	0.140855	0.0939964	0.0739226
52	299.769	180.814	304.191	95.5068	57.7004	53.3979				-0.232347	0.194331	0.0208485	-0.047245	0.241919	-0.197488	-0.0033302	0.0799742				76.9259	60.2902	100.952	111.277	63.548	17.7429				-0.245543	-0.0247645	-0.163491	-0.0843166	0.123375	-0.0420535	-0.0727989	0.0516187
53	509.804	137.237	302.794	96.276	59.6652	53.129				0.305515	-0.0935061	0.0161599	-0.0395716	0.284208	-0.201529	0.0452127	0.084268				99.3333	65.9961	87.9314	105.655	52.2838	16.8281				-0.0257805	0.0675324	-0.271381	-0.130582	-0.0757492	-0.0914439	-0.0879006	0.046067
54	519.206	173.107	251.559	99.8462	49.5396	67.8871				0.329592	0.143425	-0.155783	-0.00395606	0.0662693	0.0202688	0.066636	0.0662434				114.44	61.3961	98.0836	108.993	52.7882	25.1463				0.122383	-0.0068758	-0.187257	-0.103113	-0.0668326	0.357659	0.0193272	0.0797638
55	469.457	166.888	254.721	106.303	45.315	55.2957				0.202194	0.102349	-0.145172	0.0604576	-0.0246592	-0.168966	0.00436727	0.0591977				121.374	66.1451	107.813	115.525	52.0983	16.5753				0.19039	0.0699425	-0.106637	-0.0493587	-0.0790284	-0.105093	-0.0132974	0.0487091
56	505.462	158.47	269.838	101.597	48.0088	62.1237				0.294397	0.0467417	-0.0944383	0.0135125	0.033321	-0.0663488	0.0378641	0.0562333				132.769	65.3176	122.497	112.615	43.5655	16.2358				0.302148	0.0565572	0.0150402	-0.0733055	-0.229868	-0.123422	-0.00880841	0.074766
57	471.146	149.605	255.735	101.19	56.9427	50.0968				0.206518	-0.0118156	-0.141767	0.00944939	0.22561	-0.2471	0.00681592	0.0763012				142.259	71.0667	108.361	115.432	52.9301	20.2798				0.39522	0.149553	-0.102099	-0.0501281	-0.0643242	0.0949148	0.0705227	0.0763342
58	519.452	167.651	283.235	98.7059	68.4031	59.0538				0.330222	0.107388	-0.0494783	-0.0153314	0.472279	-0.112486	0.122099	0.0947829				145.177	73.0902	112.498	112.335	54.4039	16.1065				0.423835	0.182284	-0.067813	-0.0756146	-0.038271	-0.130403	0.049003	0.087033
59	460.633	175.074	283.404	104.606	55.2665	57.8441				0.179597	0.15642	-0.0489109	0.0435297	0.189533	-0.130667	0.0649171	0.0543816				139.584	69.5647	102.094	102.133	51.5939	18.8935				0.368985	0.125257	-0.154024	-0.159561	-0.087945	0.0200679	0.0187969	0.0830742
60	950.251	172.158	322.324	188.425	132.678	180.172				1.43342	0.137157	0.0816994	0.87969	1.85571	1.70779	1.01591	0.317374				159.329	68.6078	109.191	129.5	49.1026	21.4744				0.562634	0.109778	-0.0952163	0.065638	-0.131985	0.159412	0.11171	0.101643
61	1298.83	179.521	264.765	307.29	178.855	310.414				2.32606	0.185791	-0.111465	2.06545	2.84959	3.66518	1.8301	0.61051				138.621	73.1529	154.645	162.5	51.2707	19.1179				0.359541	0.183299	0.281425	0.337191	-0.0936584	0.0321833	0.18333	0.0739175
62	1382.39	232.563	331.669	346.167	207.967	331.817				2.54005	0.536149	0.113063	2.45329	3.47619	3.98685	2.18427	0.635702				166.329	64.9098	183.986	138.719	41.6201	14.7955				0.631287	0.0499607	0.52455	0.141503	-0.264258	-0.201185	0.146977	0.15021
63	1552.95	228.893	304.838	375.113	161.438	370.554				2.97683	0.511909	0.0230198	2.74205	2.47473	4.56902	2.21626	0.687321				159.3	63.0784	171.072	137.809	62.7686	21.1619				0.562352	0.0203366	0.417539	0.134015	0.109597	0.14254	0.231063	0.0858177
64	1565.5	253.205	295.25	352.457	212.533	333.237				3.00895	0.672495	-0.00915769	2.51603	3.57447	4.00818	2.29516	0.660108				163.741	65.1922	176.797	122.831	51.8253	15.7273				0.6059	0.0545287	0.464979	0.0107589	-0.0838544	-0.150877	0.150239	0.126593
65	1609.49	253.94	335.184	407.095	300.445	419.522				3.12162	0.677348	0.124858	3.06109	5.46665	5.30495	2.95942	0.914092				137.625	70.1137	170.011	124.004	69.1572	22.3565				0.349773	0.134137	0.408747	0.0204089	0.222532	0.207037	0.223772	0.057667
66	1560.49	274.963	295.059	389.511	189.727	424.258				2.99614	0.816214	-0.00979934	2.88568	3.0836	5.37613	2.52466	0.777565				148.214	76.6353	183.756	134.655	61.8362	16.8409				0.453621	0.239629	0.52264	0.108055	0.0931141	-0.0907528	0.221051	0.0951748
67	1654.42	289.74	346.265	401.715	150.687	342.473				3.23666	0.913818	0.162045	3.00742	2.24333	4.147	2.28504	0.613281				161.062	78.8118	185.517	144.284	59.9978	15.473				0.579626	0.274835	0.537232	0.187295	0.0606156	-0.164606	0.245833	0.115955
68	1593.03	300.637	370.691	404.095	171.822	413.522				3.07946	0.985801	0.244019	3.03116	2.69821	5.21478	2.54224	0.716444				147.835	67.2549	237.718	149.104	74.1638	18.4773				0.449908	0.0878943	0.969781	0.226959	0.311036	-0.00240293	0.340529	0.141788
69	1703.91	304.033	421.11	382.928	193.251	385.952				3.3634	1.00823	0.413222	2.82	3.15945	4.80043	2.59412	0.660848				156.543	80.3882	226.649	140.122	67.3362	19.821				0.53531	0.300334	0.87806	0.153047	0.190341	0.070144	0.35454	0.123576
70	1512.09	319.247	373.632	357.086	143.478	354.677				2.87217	1.10872	0.253889	2.56221	2.08816	4.33041	2.20259	0.580585				122.152	76.0549	182.167	149.932	69.8406	17.2301				0.198019	0.23024	0.509478	0.233768	0.234612	-0.0697398	0.22273	0.0749874
71	1529.33	297.149	387.103	390.855	105.815	341.828				2.91633	0.962759	0.299095	2.89909	1.27752	4.1373	2.08201	0.596284				131.761	94.8235	170.358	136.025	67.7882	19.7301				0.29226	0.533835	0.411625	0.119333	0.198331	0.0652363	0.270103	0.0730131
72	1480.43	350.967	387.574	379.928	175.407	347.274				2.7911	1.31825	0.300675	2.79007	2.7754	4.21915	2.36577	0.557545				147.284	84.9373	148.052	158.82	69.3472	17.1236				0.4445	0.373919	0.226792	0.306909	0.22589	-0.0754898	0.25042	0.0738212
73	1463.17	304.139	396.706	350.38	210.244	379.204				2.7469	1.00893	0.331323	2.49532	3.52521	4.69903	2.46779	0.654929				133.197	80.8824	171.058	168.698	90.5197	20.3636				0.306345	0.308329	0.417424	0.388191	0.600169	0.0994392	0.353316	0.0670686
74	1414.48	334.298	426.603	369.982	187.249	347.532				2.62223	1.20814	0.431655	2.69086	3.03027	4.22303	2.3677	0.552066				140.905	82.2941	154.844	152.662	88.869	21.1591				0.38194	0.331164	0.283073	0.256234	0.570988	0.142389	0.327631	0.0587601
75	1445.06	331.87	369.559	358.597	160.355	397.484				2.70052	1.1921	0.240218	2.57729	2.4514	4.97375	2.35588	0.654741				148.222	78.8039	244.149	145.691	77.7576	16.0994				0.453701	0.274707	1.02308	0.198868	0.374566	-0.130787	0.365689	0.155197
76	1475.06	344.661	397.868	345.018	154.293	344.124				2.77735	1.27659	0.335221	2.44183	2.32094	4.1718	2.22062	0.536096				136.905	79.9333	192.296	145.036	84.5262	13.5923				0.34271	0.292976	0.593406	0.193482	0.494218	-0.266146	0.275108	0.122995
77	1479.76	362.958	397.596	357.796	127.648	319.328				2.78939	1.39745	0.334308	2.5693	1.74743	3.79915	2.10617	0.493894				131.712	79.7843	159.272	157.115	81.2424	20.652				0.291775	0.290566	0.319765	0.292879	0.436169	0.11501	0.291027	0.0419834
78	1461.7	318.493	416.309	352.425	206.137	348.301				2.74314	1.10374	0.397109	2.51572	3.4368	4.23458	2.40518	0.584907				163.263	87.6471	142.374	132.414	91.3712	15.9162				0.601219	0.417752	0.179739	0.0896145	0.615221	-0.140678	0.293811	0.123377
79	1512.33	328.67	416.529	335.412	103.533	327.317				2.87281	1.17097	0.397849	2.346	1.2284	3.91922	1.98921	0.529583				124.193	92.1647	134.163	137.953	95.952	16.4858				0.218037	0.490827	0.111704	0.135198	0.696199	-0.109925	0.257007	0.118275
80	1167.07	336.861	422.765	356.389	144.692	207.263				1.98865	1.22507	0.418774	2.55526	2.11428	2.11494	1.73616	0.317167				125.638	90.4941	199.008	138.352	102.441	19.8139				0.232204	0.463804	0.649025	0.138484	0.810908	0.0697607	0.394031	0.12115
81	923.08	317.051	389.904	301.38	148.623	231.285				1.36384	1.09422	0.308497	2.0065	2.19891	2.47596	1.57465	0.329997				135.411	92.7765	159.528	104.331	97.4039	17.2656				0.328059	0.500724	0.321884	-0.141475	0.721865	-0.0678231	0.277206	0.134982
82	791.302	296.214	395.287	326.801	138.159	255.027				1.02638	0.956585	0.32656	2.26009	1.97367	2.83278	1.56268	0.385201				137.872	74.9569	127.454	113.982	101.515	17.6676				0.352195	0.212479	0.0561158	-0.0620575	0.794544	-0.046119	0.21786	0.132267
83	616.025	323.27	406.272	267.932	108.722	322.522				0.577528	1.1353	0.363426	1.67283	1.3401	3.84715	1.48939	0.511195				122.292	77.6549	100.18	82.6079	76.1157	19.4261				0.199391	0.256121	-0.169885	-0.320231	0.345541	0.0488232	0.0599601	0.105983
84	778.422	319.707	384.625	279	116.357	230.769				0.993397	1.11176	0.29078	1.78324	1.50441	2.4682	1.35863	0.303718				108.403	92.1294	110.222	99.8417	91.3843	18.2188				0.0631743	0.490256	-0.0866724	-0.178416	0.615453	-0.0163595	0.147906	0.133101
85	796.754	298.749	380.89	228.986	63.4648	234.962				1.04034	0.973328	0.278244	1.28432	0.365989	2.53123	1.07891	0.332334				116.169	92.8353	119.505	100.558	81.1135	20.2429				0.139334	0.501675	-0.00975635	-0.172525	0.43389	0.0929225	0.164257	0.105825
86	687.246	291.967	355.978	195.783	100.015	238.36				0.759912	0.928534	0.194642	0.953087	1.15269	2.58229	1.09519	0.325891				126.259	83.0824	164.903	107.838	74.0087	12.7926				0.238298	0.343915	0.366423	-0.112615	0.308294	-0.309322	0.139166	0.114969
87	655.709	270.553	343.529	220.819	104.914	189.871				0.67915	0.787089	0.152865	1.20284	1.25813	1.85355	0.988938	0.238153				138.881	81.6118	148.025	100.986	70.6507	22.2756				0.362084	0.320127	0.226566	-0.169003	0.248933	0.202669	0.198563	0.077451
88	627.965	297.944	365.949	175.873	82.7511	166.586				0.608103	0.968013	0.228102	0.754474	0.781099	1.50361	0.807233	0.172172				106.646	90.3608	138.52	93.5611	77.8537	15.3977				0.0459404	0.461648	0.147811	-0.230098	0.376265	-0.168672	0.105482	0.114497
89	579.819	326.423	353.941	158.792	68.1123	209.984				0.484811	1.15613	0.187807	0.584073	0.46602	2.15583	0.839111	0.293724				141.177	75.4588	133.447	95.4892	76.2948	12.973				0.384605	0.220598	0.105771	-0.214232	0.348707	-0.299582	0.0909778	0.117665
90	467.452	275.661	323.456	155.443	65.7709	208.828				0.19706	0.820822	0.0854997	0.550669	0.415625	2.13846	0.701355	0.306457				136.597	84.4431	122.695	100.496	83.2183	14.1179				0.339683	0.365925	0.0166742	-0.173029	0.471098	-0.237769	0.130431	0.123274
91	457.176	279.279	317.162	120.575	68.7819	193.801				0.170744	0.844724	0.0643771	0.202827	0.480432	1.91262	0.61262	0.284318				130.741	77.7137	88.4019	86.9676	75.286	12.8054				0.28225	0.257073	-0.267482	-0.284355	0.330874	-0.308631	0.00162136	0.12947
92	430.065	288.712	299.169	130.149	66.2885	162.511				0.101319	0.907029	0.00399459	0.298341	0.426765	1.44236	0.529968	0.223556				135.416	93.8078	72.4518	92.8058	83.1572	19.4375				0.3281	0.517406	-0.399648	-0.236314	0.470018	0.0494387	0.1215	0.155532
93	404.563	259.944	295.838	133.982	61.6189	190.489				0.0360114	0.717011	-0.00718372	0.336574	0.326259	1.86284	0.545253	0.284111				130.189	67.2627	98.2996	101.917	84.0218	13.9901				0.276842	0.0880205	-0.185467	-0.161336	0.485302	-0.244669	0.0431153	0.119589
94	352.106	231.967	278.096	148.529	55.7643	147.882				-0.0983222	0.532216	-0.0667269	0.481697	0.200247	1.2225	0.378602	0.200331				132.239	82.6078	89.4255	82.0144	74.893	15.7045				0.296942	0.336238	-0.259	-0.325115	0.323927	-0.152108	0.036814	0.128315
95	262.005	274.553	292.118	110.887	54.7203	137.607				-0.329053	0.81351	-0.0196698	0.106184	0.177776	1.06809	0.302806	0.216334				132.309	74.349	92.4534	82.0036	106.856	13.7543				0.297627	0.202646	-0.23391	-0.325203	0.888953	-0.2574	0.0954522	0.190783
96	214.598	231.256	314.301	104.063	49.033	128.591				-0.450454	0.527516	0.0547781	0.0381128	0.0553654	0.932588	0.192984	0.194505				97.4362	69.9686	85.3687	82.0036	116.105	17.5				-0.0443865	0.13179	-0.292616	-0.325203	1.05245	-0.0551678	0.0778114	0.206969
97	251.975	227.842	290.287	116.837	46.1189	152.21				-0.354738	0.504966	-0.0258139	0.165541	-0.00735643	1.28755	0.261691	0.234935				97.07	66.0745	84.0761	89.9424	124.293	17.0355				-0.047978	0.0688005	-0.303327	-0.259876	1.19719	-0.0802463	0.0957609	0.227396
98	254.121	228.381	326.662	107.045	47.1476	131.107				-0.349244	0.508529	0.0962585	0.0678596	0.0147849	0.970402	0.218098	0.187167				113.996	79.851	83.6024	60.6655	135.775	16.5895				0.118024	0.291645	-0.307252	-0.500792	1.40017	-0.104326	0.149579	0.27576
99	264.186	247.898	281.044	86.2443	35.3194	119.586				-0.323468	0.637441	-0.0568319	-0.139646	-0.2398	0.797247	0.11249	0.195863				124.893	76.8275	78.1383	75.9245	123.039	15.3665				0.224898	0.242738	-0.352528	-0.375228	1.17504	-0.170356	0.124093	0.237481
100	290.201	219.619	278.265	92.19	35.3833	91.1237				-0.256848	0.450648	-0.0661594	-0.0803326	-0.238425	0.369489	0.0297288	0.124893				116.638	82.1137	82.604	79.5935	109.697	18.1747				0.143936	0.328246	-0.315525	-0.345036	0.939168	-0.0187404	0.122008	0.194948
101	307.739	199.726	268.434	93.5204	42.196	110.968				-0.211937	0.319249	-0.0991513	-0.0670609	-0.0917913	0.667723	0.0861719	0.137948				123.128	62.7804	87.9544	93.2698	90.4258	16.8253				0.207584	0.0155162	-0.27119	-0.232495	0.598509	-0.0915951	0.0377214	0.13279
102	285.03	197.926	256.757	94.1629	33	96.5968				-0.27009	0.307359	-0.138337	-0.0606514	-0.289722	0.451744	5.06115e-05	0.12626				107.436	66.0588	104.903	78.6223	82.9563	17.6364				0.0536894	0.0685466	-0.130746	-0.353028	0.466466	-0.0478035	0.00952083	0.110851
103	279.869	207.674	332.096	73.5249	33.9978	110.769				-0.283306	0.371753	0.114494	-0.266532	-0.268246	0.664734	0.055483	0.163092				116.691	57.1804	113.251	82.6115	84.9672	15.8722				0.14446	-0.0750677	-0.0615784	-0.320201	0.502014	-0.143053	0.00776233	0.116182
104	260.472	205.591	261.5	73.7964	38.9427	122.522				-0.332978	0.35799	-0.122421	-0.263823	-0.161814	0.841364	0.053053	0.186262				118.42	61.498	106.13	83.8597	78.8952	19.2756				0.161412	-0.0052275	-0.120585	-0.30993	0.394676	0.0406976	0.0268404	0.0982821
105	275.578	204.056	297.265	76.3348	41.4471	108.371				-0.294295	0.347851	-0.00239647	-0.238501	-0.10791	0.628697	0.0555743	0.147521				123.243	64.0627	47.3001	83.813	88.7817	15.7315				0.208714	0.0362583	-0.608061	-0.310314	0.569445	-0.15065	-0.0424346	0.168035
106	329.402	204.419	296.316	80.1448	45.8194	101.866				-0.156462	0.350248	-0.00557958	-0.200493	-0.0138027	0.530928	0.0841399	0.119301				93.214	55.2745	45.5675	87.7986	60.1507	15.1307				-0.085796	-0.105897	-0.622417	-0.277517	0.0633185	-0.183087	-0.201899	0.095907
107	263.658	224.372	314.441	63.3665	36.5088	81.8925				-0.324819	0.482047	0.0552469	-0.36787	-0.2142	0.230755	-0.0231401	0.138103				110.761	57.2275	54.1093	72.3058	63.8821	14.8438				0.0863005	-0.0743058	-0.551638	-0.405005	0.129281	-0.198577	-0.168991	0.110469
108	292.699	211.163	319.066	61.8281	27.9978	93.8656				-0.250453	0.394795	0.0707681	-0.383216	-0.397387	0.410697	-0.0257993	0.151992				115.305	65.1608	47.7615	86.1187	59.4301	19.1151				0.130858	0.0540208	-0.604237	-0.291341	0.05058	0.0320322	-0.104681	0.116599
109	265.513	187.27	317.618	89.5837	26.6454	87.8172				-0.320071	0.236975	0.0659067	-0.106333	-0.426496	0.319796	-0.0383702	0.122418				125.259	61.6902	51.7974	75.6907	58.5306	13.8395				0.228491	-0.00211853	-0.570795	-0.377151	0.0346791	-0.2528	-0.156616	0.120858
110	259.161	171.642	287.118	84.2036	31.9405	103.323				-0.336337	0.133748	-0.0364496	-0.160003	-0.312526	0.552826	-0.0264571	0.136263				96.7119	62.9451	50.0697	87.3201	59.5306	16.2543				-0.0514901	0.0181803	-0.585111	-0.281455	0.0523566	-0.122424	-0.161657	0.0975507
111	214.392	173.554	265.61	70.3394	23.3789	113.258				-0.450981	0.146374	-0.108627	-0.298309	-0.496803	0.702145	-0.0843668	0.184636				108.082	64.8118	64.2262	77.8309	62.1921	17.9176				0.060026	0.0483755	-0.467807	-0.35954	0.0994055	-0.0326214	-0.108694	0.0990144
112	154.663	179.446	266	75.6244	27.9119	122.806				-0.603936	0.185299	-0.107319	-0.245587	-0.399236	0.845646	-0.0541889	0.21038				111.84	63.5961	76.9335	89.7842	66.0218	17.152				0.0968751	0.0287107	-0.362512	-0.261178	0.167105	-0.0739564	-0.0674925	0.0848332
113	164.633	170.726	288.346	90.4887	21.359	88.3763				-0.578404	0.127695	-0.0323285	-0.0973044	-0.540278	0.328199	-0.13207	0.147911				109.519	64.1529	69.2262	81.3309	53.2227	12.0469				0.0741117	0.0377173	-0.426376	-0.330739	-0.0591517	-0.349583	-0.17567	0.0891903
114	179.507	169.591	295.294	70.0317	25.5485	136.107				-0.540314	0.120199	-0.00900969	-0.301379	-0.450105	1.04555	-0.0225104	0.237348				116.769	62.7922	67.6876	78.8489	61.452	17.2784				0.145226	0.0157071	-0.439125	-0.351163	0.0863223	-0.067132	-0.101694	0.0978761
115	254	161.07	286.037	71.5339	28.6211	87.8763				-0.349552	0.0639155	-0.0400767	-0.286393	-0.383972	0.320685	-0.112566	0.113159				100.856	64.651	63.209	71.3022	55.4017	12.767				-0.0108465	0.0457744	-0.476236	-0.413264	-0.0206323	-0.310704	-0.197651	0.0935177
116	194.769	181.73	284.949	68.9321	27.0374	115.575				-0.501233	0.200384	-0.0437289	-0.312348	-0.418059	0.73697	-0.0563357	0.190588				89.4568	76.7608	83.0509	74.705	57.7358	15.0966				-0.122645	0.241659	-0.311822	-0.385263	0.0206289	-0.184928	-0.123728	0.0934296
117	201.668	161.888	310.11	85.8235	19.674	75.328				-0.483564	0.0693226	0.0407126	-0.143843	-0.576545	0.132097	-0.160303	0.123377				82.1893	69.6353	75.8146	74.946	57.1419	16.8054				-0.193922	0.126399	-0.371783	-0.383279	0.0101302	-0.0926695	-0.150854	0.0838365
118	173.07	140.712	282.449	73.8643	26.5881	105.296				-0.556798	-0.0705566	-0.0521188	-0.263146	-0.427729	0.582479	-0.131312	0.163884				55.8519	54.0196	83.3858	76.4712	54.5175	16.3196				-0.452228	-0.126196	-0.309047	-0.370729	-0.0362628	-0.118898	-0.23556	0.0673067
119	220.467	190.177	281.176	72.914	20.9185	113.554				-0.435424	0.256176	-0.0563876	-0.272626	-0.549759	0.706589	-0.0585719	0.192669				60.4897	54.5843	103.82	97.1079	65.3035	18.3551				-0.406742	-0.117061	-0.139725	-0.200912	0.154408	-0.00900056	-0.119839	0.076765
120	209.126	153.781	284.838	77.0452	28.6586	59				-0.464468	0.0157734	-0.0440991	-0.231414	-0.383164	-0.113295	-0.203444	0.0780575				73.358	53.4431	104.96	73.1259	53.7533	12.4347				-0.280535	-0.135521	-0.130279	-0.398257	-0.049772	-0.328645	-0.220502	0.0551985
121	216.809	152.377	294.243	69.6833	25.1035	98.9194				-0.444792	0.00649494	-0.0125385	-0.304855	-0.459683	0.48665	-0.121454	0.147265				68.2181	51.8118	121.399	87.0288	52.4367	16.0455				-0.330945	-0.161908	0.00593693	-0.283852	-0.0730463	-0.133697	-0.162919	0.0517371
122	187.397	152.116	339.235	67.4163	31.2974	102.731				-0.520111	0.00477492	0.138454	-0.32747	-0.326368	0.543937	-0.0811302	0.159147				63.3868	58.8392	126.317	86.5036	58.5393	18.1136				-0.378329	-0.0482354	0.0466886	-0.288174	0.0348329	-0.0220392	-0.109209	0.0732171
123	215.528	173.53	303.478	82.095	22.2225	106.473				-0.448073	0.14622	0.0184547	-0.181038	-0.521692	0.600174	-0.0643258	0.169589				97.07	48.9059	132.624	86.4389	60.4716	19.929				-0.047978	-0.208913	0.0989506	-0.288706	0.0689912	0.0759749	-0.0502801	0.0669459
124	226.799	156.967	274.426	71.276	19.9559	75.1075				-0.419209	0.0368179	-0.0790402	-0.288966	-0.570478	0.128783	-0.198682	0.111359				89.7202	59.7804	148.313	83.0252	61.6026	15.3395				-0.120062	-0.0330109	0.228955	-0.316797	0.0889846	-0.171814	-0.0539573	0.079216
125	231.442	148.358	313.699	78.6471	24.5088	105.866				-0.407319	-0.0200491	0.0527544	-0.215434	-0.472483	0.591044	-0.078581	0.158222				76.8971	51.7647	133.17	83.0755	56.7293	16.3239				-0.245825	-0.16267	0.103476	-0.316383	0.00283646	-0.118666	-0.122872	0.0635614
126	232.724	162.73	312.529	74.1312	20.0132	98.7043				-0.404037	0.074883	0.048831	-0.260483	-0.569244	0.483418	-0.104439	0.156138				82.93	63.0549	71.9293	67.9173	51.1987	17.8253				-0.186657	0.0199564	-0.403978	-0.441118	-0.0949311	-0.0376047	-0.190722	0.0785703
127	212.276	171.047	278.816	83.4118	25.1454	100.591				-0.456399	0.129815	-0.0643086	-0.167902	-0.458781	0.511779	-0.0842996	0.151354				71.1893	61.9176	70.0675	97.8058	50.9345	15.6605				-0.301805	0.00155982	-0.419405	-0.195169	-0.0996016	-0.154483	-0.194817	0.0608668
128	161.266	162.712	307.603	88.6697	28.5242	110.957				-0.587026	0.0747601	0.0322979	-0.11545	-0.386057	0.667562	-0.052319	0.177277				102.432	70.4745	67.7631	111.302	60.3821	17.8153				0.00461123	0.139974	-0.4385	-0.0841092	0.0674091	-0.0381446	-0.0581266	0.0826029
129	158.286	168	263.949	86.6742	24.4427	95.1505				-0.594657	0.109692	-0.114204	-0.135357	-0.473906	0.430008	-0.129737	0.153353				105.584	69.5176	79.097	104.95	59.1004	18.0298				0.0355277	0.124495	-0.344584	-0.136384	0.0447518	-0.0265636	-0.0504596	0.0686857
130	191.437	167.684	299.824	71.733	24.9868	105.57				-0.509764	0.107602	0.00619072	-0.284407	-0.462195	0.5866	-0.0926622	0.169171				90.7737	63.3686	87.5118	101.338	69.5633	15.6989				-0.109729	0.0250307	-0.274858	-0.166102	0.22971	-0.15241	-0.0747264	0.0726396
131	197.698	159.149	288.728	80.7647	23.8921	102.769				-0.49373	0.0512267	-0.0310455	-0.194309	-0.485757	0.544503	-0.101519	0.158716				95.3333	62.6078	90.4845	107.101	81.2424	15.4616				-0.0650108	0.0127243	-0.250225	-0.118683	0.436169	-0.165222	-0.0250413	0.0991405
132	173.97	170.879	278.735	85.8733	21.2489	108.882				-0.554495	0.128709	-0.0645801	-0.143347	-0.542648	0.636373	-0.089998	0.182537				98.1358	65.4118	102.831	116.396	96.8734	18.6236				-0.0375251	0.0580809	-0.147922	-0.0421955	0.712487	0.00549586	0.0914035	0.127277
133	166.025	178.907	250.375	83.4344	26.2401	102.72				-0.57484	0.181736	-0.159756	-0.167677	-0.435219	0.543775	-0.101997	0.167311				79.7819	61.7725	111.46	103.126	96.4345	16.3864				-0.217532	-0.000787271	-0.076419	-0.151391	0.704728	-0.115291	0.0238845	0.139355
134	189.01	170.395	259.169	80.914	19.2269	86.3441				-0.51598	0.125514	-0.130243	-0.19282	-0.586168	0.297657	-0.167007	0.141537				84.1893	65.0196	112.435	106.953	113.679	17.4844				-0.174307	0.0517368	-0.0683416	-0.119897	1.00957	-0.05601	0.107125	0.183086
135	217.925	164.544	276.11	86.7421	23.5529	106.21				-0.441935	0.086865	-0.0733894	-0.13468	-0.493057	0.596216	-0.0766635	0.162244				69.144	81.1451	118.041	102.09	97.1747	16.8707				-0.321865	0.312578	-0.0218882	-0.159916	0.717813	-0.0891439	0.0729297	0.154773
136	139.03	156.772	275.699	100.258	22.6784	106.548				-0.643969	0.0355279	-0.0747714	0.000150967	-0.51188	0.601306	-0.0989393	0.181329				90.9136	68.8471	121.248	90.6331	96.0437	16.8523				-0.108357	0.113649	0.00468902	-0.254192	0.69782	-0.0901374	0.0605785	0.136913
137	178.367	173.944	294.949	80.5385	27.5991	112.366				-0.543235	0.148955	-0.0101695	-0.196565	-0.405969	0.688732	-0.053042	0.180584				106.605	57.9961	126.956	93.6583	91.0961	15.9048				0.0455363	-0.0618731	0.0519868	-0.229298	0.610358	-0.141293	0.0459027	0.121249
138	182.698	134.2	307.794	68.3439	22.7533	90.6075				-0.532143	-0.113568	0.0329396	-0.318216	-0.510268	0.361732	-0.17992	0.14088				96.8889	62.1726	131.03	75.0971	80.5677	13.706				-0.0497542	0.00568462	0.0857399	-0.382036	0.424242	-0.260007	-0.0293553	0.115214
139	188.683	143.953	338.221	75.5566	23.8811	109.887				-0.516816	-0.0491429	0.135049	-0.246264	-0.485993	0.651483	-0.0852807	0.179386				93.5885	61.6667	145.669	76.7374	89.1769	16.6747				-0.0821231	-0.00249866	0.207044	-0.368538	0.576431	-0.0997261	0.0384316	0.131503

## Sheet: E
			6.25	12.5	25	50	100	200	400	800				6.25	12.5	25	50	100	200	400	800		Bonferroni's multiple comparisons test	95% confidence interval	P Value	F (DFn, DFd)			Bonferroni's multiple comparisons test	95% confidence interval	P Value	F (DFn, DFd)
		/ASTA fed	0/10	0/10	0/10	0/10	1/10	2/10	4/10	8/10			/ASTA fed	0	0	0	0	0.1	0.2	0.4	0.8		PK2-R1i/ASTA fed vs. +/ASTA fed	0.1173 to 0.1827	<0.0001	F (14, 72) = 11.19			Row 1			F (14, 72) = 11.19
			0/10	0/10	0/10	0/10	0/10	0/10	4/10	9/10				0	0	0	0	0	0	0.4	0.9		PK2-R1i/ASTA fed vs. PK2-R1i/+fed	0.08293 to 0.1483	<0.0001				PK2-R1i/ASTA fed vs. +/ASTA fed	-0.09248 to 0.09248	>0.9999
			0/10	0/10	0/10	0/10	1/10	1/10	5/10	8/10				0	0	0	0	0.1	0.1	0.5	0.8								PK2-R1i/ASTA fed vs. PK2-R1i/+fed	-0.09248 to 0.09248	>0.9999
			0/10	0/10	0/10	0/10	0/10	3/10	5/10	10/10				0	0	0	0	0	0.3	0.5	1								Row 2
																													PK2-R1i/ASTA fed vs. +/ASTA fed	-0.09248 to 0.09248	>0.9999
													mean	0	0	0	0	0.05	0.15	0.45	0.875								PK2-R1i/ASTA fed vs. PK2-R1i/+fed	-0.09248 to 0.09248	>0.9999
													SEM	0	0	0	0	0.0288675	0.0645497	0.0288675	0.0478714								Row 3
		PK2-R1i/ASTA fed	0/10	0/10	0/10	0/10	2/10	5/10	8/10	9/10			PK2-R1i/ASTA fed	0	0	0	0	0.2	0.5	0.8	0.9								PK2-R1i/ASTA fed vs. +/ASTA fed	-0.09248 to 0.09248	>0.9999
			0/10	0/10	0/10	1/10	3/10	6/10	8/10	10/10				0	0	0	0.1	0.3	0.6	0.8	1								PK2-R1i/ASTA fed vs. PK2-R1i/+fed	-0.09248 to 0.09248	>0.9999
			0/10	0/10	0/10	0/10	2/10	7/10	10/10	10/10				0	0	0	0	0.2	0.7	1	1								Row 4
			0/10	0/10	0/10	2/10	2/10	6/10	8/10	10/10				0	0	0	0.2	0.2	0.6	0.8	1								PK2-R1i/ASTA fed vs. +/ASTA fed	-0.01748 to 0.1675	0.1349
																													PK2-R1i/ASTA fed vs. PK2-R1i/+fed	-0.04248 to 0.1425	0.4397
													mean	0	0	0	0.075	0.225	0.6	0.85	0.975								Row 5
													SEM	0	0	0	0.0478714	0.025	0.0408248	0.05	0.025								PK2-R1i/ASTA fed vs. +/ASTA fed	0.08252 to 0.2675	<0.0001
		PK2-R1i/ fed	0/10	0/10	0/10	0/10	0/10	2/10	5/10	9/10			PK2-R1i/ fed	0	0	0	0	0	0.2	0.5	0.9								PK2-R1i/ASTA fed vs. PK2-R1i/+fed	0.08252 to 0.2675	<0.0001
			0/10	0/10	0/10	1/10	1/10	2/10	5/10	9/10				0	0	0	0.1	0.1	0.2	0.5	0.9								Row 6
			0/10	0/10	0/10	0/10	0/10	3/10	6/10	9/10				0	0	0	0	0	0.3	0.6	0.9								PK2-R1i/ASTA fed vs. +/ASTA fed	0.3575 to 0.5425	<0.0001
			0/10	0/10	0/10	0/10	1/10	3/10	6/10	10/10				0	0	0	0	0.1	0.3	0.6	1								PK2-R1i/ASTA fed vs. PK2-R1i/+fed	0.2575 to 0.4425	<0.0001
																													Row 7
													mean	0	0	0	0.025	0.05	0.25	0.55	0.925								PK2-R1i/ASTA fed vs. +/ASTA fed	0.3075 to 0.4925	<0.0001
													SEM	0	0	0	0.025	0.0288675	0.0288675	0.0288675	0.025								PK2-R1i/ASTA fed vs. PK2-R1i/+fed	0.2075 to 0.3925	<0.0001
																													Row 8
																													PK2-R1i/ASTA fed vs. +/ASTA fed	0.007521 to 0.1925	0.0313
																													PK2-R1i/ASTA fed vs. PK2-R1i/+fed	-0.04248 to 0.1425	0.4397
			6.25	12.5	25	50	100	200	400	800				6.25	12.5	25	50	100	200	400	800		Bonferroni's multiple comparisons test	95% confidence interval	P Value	F (DFn, DFd)			Bonferroni's multiple comparisons test	95% confidence interval	P Value	F (DFn, DFd)
		/ASTA ST	0/10	0/10	1/10	3/10	5/10	8/10	10/10	10/10			/ASTA ST	0	0	0.1	0.3	0.5	0.8	1	1		PK2-R1i/ASTA ST vs. +/ASTA ST	0.08982 to 0.1664	<0.0001	F (14, 72) = 4.236			Row 1			F (14, 72) = 4.236
			0/10	0/10	2/10	2/10	4/10	7/10	9/10	10/10				0	0	0.2	0.2	0.4	0.7	0.9	1		PK2-R1i/ASTA ST vs. PK2-R1i/+ ST	0.1023 to 0.1789	<0.0001				PK2-R1i/ASTA ST vs. +/ASTA ST	-0.08334 to 0.1333	>0.9999
			0/10	0/10	0/10	1/10	3/10	6/10	10/10	10/10				0	0	0	0.1	0.3	0.6	1	1								PK2-R1i/ASTA ST vs. PK2-R1i/+ ST	-0.08334 to 0.1333	>0.9999
			0/10	0/10	1/10	2/10	5/10	7/10	10/10	10/10				0	0	0.1	0.2	0.5	0.7	1	1								Row 2
																													PK2-R1i/ASTA ST vs. +/ASTA ST	-0.008337 to 0.2083	0.0761
													mean	0	0	0.1	0.2	0.425	0.7	0.975	1								PK2-R1i/ASTA ST vs. PK2-R1i/+ ST	-0.008337 to 0.2083	0.0761
													SEM	0	0	0.0408248	0.0408248	0.0478714	0.0408248	0.025	0								Row 3
		PK2-R1i/ASTA ST	0/10	1/10	4/10	4/10	8/10	9/10	10/10	10/10			PK2-R1i/ASTA ST	0	0.1	0.4	0.4	0.8	0.9	1	1								PK2-R1i/ASTA ST vs. +/ASTA ST	0.09166 to 0.3083	0.0001
			0/10	1/10	2/10	3/10	6/10	10/10	10/10	10/10				0	0.1	0.2	0.3	0.6	1	1	1								PK2-R1i/ASTA ST vs. PK2-R1i/+ ST	0.06666 to 0.2833	0.0008
			1/10	2/10	3/10	5/10	7/10	9/10	10/10	10/10				0.1	0.2	0.3	0.5	0.7	0.9	1	1								Row 4
			0/10	0/10	3/10	4/10	7/10	8/10	10/10	10/10				0	0	0.3	0.4	0.7	0.8	1	1								PK2-R1i/ASTA ST vs. +/ASTA ST	0.09166 to 0.3083	0.0001
																													PK2-R1i/ASTA ST vs. PK2-R1i/+ ST	0.06666 to 0.2833	0.0008
													mean	0.025	0.1	0.3	0.4	0.7	0.9	1	1								Row 5
													SEM	0.025	0.0408248	0.0408248	0.0408248	0.0408248	0.0408248	0	0								PK2-R1i/ASTA ST vs. +/ASTA ST	0.1667 to 0.3833	<0.0001
		PK2-R1i/ ST	0/10	0/10	1/10	2/10	3/10	8/10	10/10	10/10			PK2-R1i/ ST	0	0	0.1	0.2	0.3	0.8	1	1								PK2-R1i/ASTA ST vs. PK2-R1i/+ ST	0.2417 to 0.4583	<0.0001
			0/10	0/10	2/10	2/10	3/10	6/10	10/10	10/10				0	0	0.2	0.2	0.3	0.6	1	1								Row 6
			0/10	0/10	2/10	3/10	5/10	6/10	9/10	10/10				0	0	0.2	0.3	0.5	0.6	0.9	1								PK2-R1i/ASTA ST vs. +/ASTA ST	0.09166 to 0.3083	0.0001
			0/10	0/10	0/10	2/10	3/10	5/10	10/10	10/10				0	0	0	0.2	0.3	0.5	1	1								PK2-R1i/ASTA ST vs. PK2-R1i/+ ST	0.1667 to 0.3833	<0.0001
																													Row 7
													mean	0	0	0.125	0.225	0.35	0.625	0.975	1								PK2-R1i/ASTA ST vs. +/ASTA ST	-0.08334 to 0.1333	>0.9999
													SEM	0	0	0.0478714	0.025	0.05	0.0629153	0.025	0								PK2-R1i/ASTA ST vs. PK2-R1i/+ ST	-0.08334 to 0.1333	>0.9999
																													Row 8
																													PK2-R1i/ASTA ST vs. +/ASTA ST	-0.1083 to 0.1083	>0.9999
																													PK2-R1i/ASTA ST vs. PK2-R1i/+ ST	-0.1083 to 0.1083	>0.9999

## Sheet: F
	6.25	12.5	25	50	100	200	400	800					6.25	12.5	25	50	100	200	400	800		Bonferroni's multiple comparisons test	95% confidence interval	P Value	F (DFn, DFd)			Bonferroni's multiple comparisons test	95% confidence interval	P Value	F (DFn, DFd)
/ASTA fed	0/10	0/10	0/10	0/10	1/10	2/10	4/10	8/10				/ASTA fed	0	0	0	0	0.1	0.2	0.4	0.8		PK2-R2i/ASTA fed vs. +/ASTA fed	-0.06234 to -0.0001583	0.0486	F (14, 72) = 1.230			Row 1			F (14, 72) = 1.230
	0/10	0/10	0/10	0/10	0/10	0/10	4/10	9/10					0	0	0	0	0	0	0.4	0.9		PK2-R2i/ASTA fed vs. PK2-R2i/+ fed	-0.04359 to 0.01859	0.7209				PK2-R2i/ASTA fed vs. +/ASTA fed	-0.08794 to 0.08794	>0.9999
	0/10	0/10	0/10	0/10	1/10	1/10	5/10	8/10					0	0	0	0	0.1	0.1	0.5	0.8								PK2-R2i/ASTA fed vs. PK2-R2i/+ fed	-0.08794 to 0.08794	>0.9999
	0/10	0/10	0/10	0/10	0/10	3/10	5/10	10/10					0	0	0	0	0	0.3	0.5	1								Row 2
																												PK2-R2i/ASTA fed vs. +/ASTA fed	-0.08794 to 0.08794	>0.9999
												mean	0	0	0	0	0.05	0.15	0.45	0.875								PK2-R2i/ASTA fed vs. PK2-R2i/+ fed	-0.08794 to 0.08794	>0.9999
												SEM	0	0	0	0	0.0288675	0.0645497	0.0288675	0.0478714								Row 3
PK2-R2i/ASTA fed	0/10	0/10	0/10	0/10	0/10	1/10	5/10	8/10				PK2-R2i/ASTA fed	0	0	0	0	0	0.1	0.5	0.8								PK2-R2i/ASTA fed vs. +/ASTA fed	-0.08794 to 0.08794	>0.9999
	0/10	0/10	0/10	0/10	1/10	2/10	2/10	7/10					0	0	0	0	0.1	0.2	0.2	0.7								PK2-R2i/ASTA fed vs. PK2-R2i/+ fed	-0.08794 to 0.08794	>0.9999
	0/10	0/10	0/10	0/10	0/10	2/10	3/10	8/10					0	0	0	0	0	0.2	0.3	0.8								Row 4
	0/10	0/10	0/10	0/10	0/10	1/10	3/10	8/10					0	0	0	0	0	0.1	0.3	0.8								PK2-R2i/ASTA fed vs. +/ASTA fed	-0.08794 to 0.08794	>0.9999
																												PK2-R2i/ASTA fed vs. PK2-R2i/+ fed	-0.08794 to 0.08794	>0.9999
												mean	0	0	0	0	0.025	0.15	0.325	0.775								Row 5
												SEM	0	0	0	0	0.025	0.0288675	0.0629153	0.025								PK2-R2i/ASTA fed vs. +/ASTA fed	-0.1129 to 0.06294	>0.9999
PK2-R2i/ fed	0/10	0/10	0/10	0/10	0/10	1/10	3/10	9/10				PK2-R2i/ fed	0	0	0	0	0	0.1	0.3	0.9								PK2-R2i/ASTA fed vs. PK2-R2i/+ fed	-0.08794 to 0.08794	>0.9999
	0/10	0/10	0/10	0/10	0/10	1/10	4/10	9/10					0	0	0	0	0	0.1	0.4	0.9								Row 6
	0/10	0/10	0/10	0/10	0/10	1/10	5/10	9/10					0	0	0	0	0	0.1	0.5	0.9								PK2-R2i/ASTA fed vs. +/ASTA fed	-0.08794 to 0.08794	>0.9999
	0/10	0/10	0/10	0/10	1/10	1/10	3/10	8/10					0	0	0	0	0.1	0.1	0.3	0.8								PK2-R2i/ASTA fed vs. PK2-R2i/+ fed	-0.03794 to 0.1379	0.3944
																												Row 7
												mean	0	0	0	0	0.025	0.1	0.375	0.875								PK2-R2i/ASTA fed vs. +/ASTA fed	-0.2129 to -0.03706	0.0035
												SEM	0	0	0	0	0.025	0	0.0478714	0.025								PK2-R2i/ASTA fed vs. PK2-R2i/+ fed	-0.1379 to 0.03794	0.3944
																												Row 8
																												PK2-R2i/ASTA fed vs. +/ASTA fed	-0.1879 to -0.01206	0.0224
																												PK2-R2i/ASTA fed vs. PK2-R2i/+ fed	-0.1879 to -0.01206	0.0224
	6.25	12.5	25	50	100	200	400	800					6.25	12.5	25	50	100	200	400	800		Bonferroni's multiple comparisons test	95% confidence interval	P Value	F (DFn, DFd)			Bonferroni's multiple comparisons test	95% confidence interval	P Value	F (DFn, DFd)
/ASTA ST	0/10	0/10	1/10	3/10	5/10	8/10	10/10	10/10				/ASTA ST	0	0	0.1	0.3	0.5	0.8	1	1		PK2-R2i/ASTA ST vs. +/ASTA ST	-0.1182 to -0.01930	0.0043	F (14, 72) = 1.039			Row 1			F (14, 72) = 1.039
	0/10	0/10	2/10	2/10	4/10	7/10	9/10	10/10					0	0	0.2	0.2	0.4	0.7	0.9	1		PK2-R2i/ASTA ST vs. PK2-R2i/+ ST	-0.1276 to -0.02868	0.0011				PK2-R2i/ASTA ST vs. +/ASTA ST	-0.1399 to 0.1399	>0.9999
	0/10	0/10	0/10	1/10	3/10	6/10	10/10	10/10					0	0	0	0.1	0.3	0.6	1	1								PK2-R2i/ASTA ST vs. PK2-R2i/+ ST	-0.1399 to 0.1399	>0.9999
	0/10	0/10	1/10	2/10	5/10	7/10	10/10	10/10					0	0	0.1	0.2	0.5	0.7	1	1								Row 2
																												PK2-R2i/ASTA ST vs. +/ASTA ST	-0.1399 to 0.1399	>0.9999
												mean	0	0	0.1	0.2	0.425	0.7	0.975	1								PK2-R2i/ASTA ST vs. PK2-R2i/+ ST	-0.1399 to 0.1399	>0.9999
												SEM	0	0	0.0408248	0.0408248	0.0478714	0.0408248	0.025	0								Row 3
PK2-R2i/ASTA ST	0/10	0/10	1/10	0/10	0/10	4/10	7/10	9/10				PK2-R2i/ASTA ST	0	0	0.1	0	0	0.4	0.7	0.9								PK2-R2i/ASTA ST vs. +/ASTA ST	-0.1899 to 0.08986	0.8317
	0/10	0/10	0/10	1/10	2/10	5/10	10/10	10/10					0	0	0	0.1	0.2	0.5	1	1								PK2-R2i/ASTA ST vs. PK2-R2i/+ ST	-0.1649 to 0.1149	>0.9999
	0/10	0/10	0/10	1/10	4/10	7/10	10/10	10/10					0	0	0	0.1	0.4	0.7	1	1								Row 4
	0/10	0/10	1/10	3/10	5/10	6/10	8/10	10/10					0	0	0.1	0.3	0.5	0.6	0.8	1								PK2-R2i/ASTA ST vs. +/ASTA ST	-0.2149 to 0.06486	0.4472
																												PK2-R2i/ASTA ST vs. PK2-R2i/+ ST	-0.2149 to 0.06486	0.4472
												mean	0	0	0.05	0.125	0.275	0.55	0.875	0.975								Row 5
												SEM	0	0	0.0288675	0.0629153	0.110868	0.0645497	0.075	0.025								PK2-R2i/ASTA ST vs. +/ASTA ST	-0.2899 to -0.01014	0.033
PK2-R2i/ ST	0/10	0/10	0/10	2/10	4/10	8/10	10/10	10/10				PK2-R2i/ ST	0	0	0	0.2	0.4	0.8	1	1								PK2-R2i/ASTA ST vs. PK2-R2i/+ ST	-0.3149 to -0.03514	0.0109
	0/10	0/10	0/10	1/10	3/10	7/10	10/10	10/10					0	0	0	0.1	0.3	0.7	1	1								Row 6
	0/10	0/10	1/10	3/10	6/10	8/10	9/10	10/10					0	0	0.1	0.3	0.6	0.8	0.9	1								PK2-R2i/ASTA ST vs. +/ASTA ST	-0.2899 to -0.01014	0.033
	0/10	0/10	2/10	2/10	5/10	8/10	10/10	10/10					0	0	0.2	0.2	0.5	0.8	1	1								PK2-R2i/ASTA ST vs. PK2-R2i/+ ST	-0.3649 to -0.08514	0.0009
																												Row 7
												mean	0	0	0.075	0.2	0.45	0.775	0.975	1								PK2-R2i/ASTA ST vs. +/ASTA ST	-0.2399 to 0.03986	0.2121
												SEM	0	0	0.0478714	0.0408248	0.0645497	0.025	0.025	0								PK2-R2i/ASTA ST vs. PK2-R2i/+ ST	-0.2399 to 0.03986	0.2121
																												Row 8
																												PK2-R2i/ASTA ST vs. +/ASTA ST	-0.1649 to 0.1149	>0.9999
																												PK2-R2i/ASTA ST vs. PK2-R2i/+ ST	-0.1649 to 0.1149	>0.9999
