# Supplementary material for: Hugin-AstA circuitry is a novel central energy sensor that directly regulates sweet sensation in Drosophila and mouse
Source: eLife. 2026 May 5;14:RP108551. doi: 10.7554/eLife.108551 (PMC13143273; doi:10.7554/eLife.108551)
Supplement: Figure 5—figure supplement 2—source data 1. [file elife-108551-fig5-figsupp2-data1.xlsx]

## Sheet: A
	6.25	12.5	25	50	100	200	400	800							6.25	12.5	25	50	100	200	400	800
w1118 fed	0/10	0/10	0/10	0/10	0/10	2/10	6/10	8/10						w1118 fed	0	0	0	0	0	0.2	0.6	0.8
	0/10	0/10	0/10	0/10	2/10	3/10	5/10	8/10							0	0	0	0	0.2	0.3	0.5	0.8
	0/10	0/10	0/10	0/10	1/10	4/10	6/10	9/10							0	0	0	0	0.1	0.4	0.6	0.9
	0/10	0/10	0/10	0/10	1/10	2/10	4/10	9/10							0	0	0	0	0.1	0.2	0.4	0.9
ASTA-R1-KO fed	0/10	0/10	0/10	0/10	2/10	3/10	6/10	10/10						ASTA-R1-KO fed	0	0	0	0	0.2	0.3	0.6	1
	0/10	0/10	0/10	0/10	3/10	3/10	7/10	10/10							0	0	0	0	0.3	0.3	0.7	1
	0/10	0/10	0/10	1/10	3/10	5/10	8/10	10/10							0	0	0	0.1	0.3	0.5	0.8	1
	0/10	0/10	0/10	0/10	2/10	4/10	9/10	10/10							0	0	0	0	0.2	0.4	0.9	1
				Bonferroni's multiple comparisons test	95% confidence interval	P value	F (DFn, DFd)
				w1118 fed vs. ASTA-R1-KO fed	-0.1166 to -0.04588	<0.0001	F (14, 72) = 2.665			Bonferroni's multiple comparisons test	95% confidence interval	P value	F (DFn, DFd)
										w1118 fed - ASTA-R1-KO fed			F (7, 48) = 4.071
										Row 1	-0.1239 to 0.1239	>0.9999
										Row 2	-0.1239 to 0.1239	>0.9999
										Row 3	-0.1239 to 0.1239	>0.9999
										Row 4	-0.1489 to 0.09885	>0.9999
										Row 5	-0.2739 to -0.02615	0.009
										Row 6	-0.2239 to 0.02385	0.2022
										Row 7	-0.3489 to -0.1011	<0.0001
										Row 8	-0.2739 to -0.02615	0.009

## Sheet: B
	6.25	12.5	25	50	100	200	400	800							6.25	12.5	25	50	100	200	400	800
w1118 ST	0/10	0/10	0/10	2/10	4/10	6/10	8/10	10/10						w1118 ST	0	0	0	0.2	0.4	0.6	0.8	1
	0/10	1/10	1/10	4/10	6/10	8/10	9/10	10/10							0	0.1	0.1	0.4	0.6	0.8	0.9	1
	0/10	0/10	1/10	3/10	6/10	8/10	10/10	10/10							0	0	0.1	0.3	0.6	0.8	1	1
	0/10	0/10	0/10	5/10	7/10	9/10	10/10	10/10							0	0	0	0.5	0.7	0.9	1	1
AstA-R1-KO ST	0/10	1/10	3/10	4/10	7/10	8/10	10/10	10/10						AstA-R1-KO ST	0	0.1	0.3	0.4	0.7	0.8	1	1
	0/10	2/10	3/10	6/10	8/10	8/10	10/10	10/10							0	0.2	0.3	0.6	0.8	0.8	1	1
	0/10	2/10	2/10	5/10	8/10	9/10	10/10	10/10							0	0.2	0.2	0.5	0.8	0.9	1	1
	0/10	2/10	3/10	4/10	8/10	9/10	10/10	10/10							0	0.2	0.3	0.4	0.8	0.9	1	1
						Bonferroni's multiple comparisons test	95% confidence interval	P value	F (DFn, DFd)				Bonferroni's multiple comparisons test	95% confidence interval	P value	F (DFn, DFd)
						w1118 ST vs. AstA-R1-KO ST	-0.1438 to -0.06870	<0.0001	F (14, 72) = 2.198				w1118 ST - AstA-R1-KO ST			F (7, 48) = 2.726
													Row 1	-0.1460 to 0.1460	>0.9999
													Row 2	-0.2960 to -0.004040	0.0404
													Row 3	-0.3710 to -0.07904	0.0005
													Row 4	-0.2710 to 0.02096	0.144
													Row 5	-0.3460 to -0.05404	0.0022
													Row 6	-0.2210 to 0.07096	>0.9999
													Row 7	-0.2210 to 0.07096	>0.9999
													Row 8	-0.1460 to 0.1460	>0.9999

## Sheet: C
	6.25	12.5	25	50	100	200	400	800							6.25	12.5	25	50	100	200	400	800
w1118 refed	0/10	0/10	0/10	0/10	1/10	1/10	8/10	10/10						w1118 refed	0	0	0	0	0.1	0.1	0.8	1
	0/10	0/10	0/10	0/10	1/10	4/10	5/10	8/10							0	0	0	0	0.1	0.4	0.5	0.8
	0/10	0/10	0/10	0/10	1/10	4/10	8/10	9/10							0	0	0	0	0.1	0.4	0.8	0.9
	0/10	0/10	0/10	1/10	0/10	3/10	6/10	10/10							0	0	0	0.1	0	0.3	0.6	1
AstA-R1-KO refed	0/10	0/10	0/10	1/10	3/10	3/10	6/10	10/10						AstA-R1-KO refed	0	0	0	0.1	0.3	0.3	0.6	1
	0/10	0/10	0/10	0/10	2/10	4/10	7/10	9/10							0	0	0	0	0.2	0.4	0.7	0.9
	0/10	0/10	0/10	2/10	4/10	5/10	8/10	9/10							0	0	0	0.2	0.4	0.5	0.8	0.9
	0/10	0/10	1/10	2/10	4/10	7/10	9/10	10/10							0	0	0.1	0.2	0.4	0.7	0.9	1
				Bonferroni's multiple comparisons test	95% confidence interval	P value	F (DFn, DFd)
				w1118 refed vs. AstA-R1-KO refed	-0.1331 to -0.02944	0.0012	F (14, 72) = 1.329		Bonferroni's multiple comparisons test	95% confidence interval	P value	F (DFn, DFd)
									w1118 refed - AstA-R1-KO refed			F (7, 48) = 2.064
									Row 1	-0.1800 to 0.1800	>0.9999
									Row 2	-0.1800 to 0.1800	>0.9999
									Row 3	-0.2050 to 0.1550	>0.9999
									Row 4	-0.2800 to 0.07995	0.9482
									Row 5	-0.4300 to -0.07005	0.0019
									Row 6	-0.3550 to 0.004952	0.0617
									Row 7	-0.2550 to 0.1050	>0.9999
									Row 8	-0.2050 to 0.1550	>0.9999
