# Supplementary material for: Hugin-AstA circuitry is a novel central energy sensor that directly regulates sweet sensation in Drosophila and mouse
Source: eLife. 2026 May 5;14:RP108551. doi: 10.7554/eLife.108551 (PMC13143273; doi:10.7554/eLife.108551)
Supplement: Figure 5—source data 1. [file elife-108551-fig5-data1.xlsx]

## Sheet: A
	6.25	12.5	25	50	100	200	400	800							6.25	12.5	25	50	100	200	400	800		Bonferroni's multiple comparisons test	95% confidence interval	P Value	F (DFn, DFd)		Bonferroni's multiple comparisons test	95% confidence interval	P Value	F (DFn, DFd)
fed-H2O	0/10	0/10	1/10	2/10	3/10	6/10	10/10	10/10						fed-H2O	0	0	0.1	0.2	0.3	0.6	1	1		fed-ASTA2 vs. fed-H2O	-0.2106 to -0.1331	<0.0001	F (14, 72) = 8.471		Row 1			F (14, 72) = 8.471
	0/10	0/10	0/10	1/10	4/10	7/10	9/10	10/10							0	0	0	0.1	0.4	0.7	0.9	1		fed-ASTA2 vs. fed-control peptide	-0.1950 to -0.1175	<0.0001			fed-ASTA2 vs. fed-H2O	-0.1096 to 0.1096	>0.9999
	0/10	0/10	0/10	2/10	4/10	7/10	9/10	10/10							0	0	0	0.2	0.4	0.7	0.9	1							fed-ASTA2 vs. fed-control peptide	-0.1096 to 0.1096	>0.9999
	0/10	0/10	0/10	1/10	2/10	7/10	9/10	10/10							0	0	0	0.1	0.2	0.7	0.9	1							Row 2
																													fed-ASTA2 vs. fed-H2O	-0.1096 to 0.1096	>0.9999
														mean	0	0	0.025	0.15	0.325	0.675	0.925	1							fed-ASTA2 vs. fed-control peptide	-0.1096 to 0.1096	>0.9999
														SEM	0	0	0.025	0.0288675	0.0478714	0.025	0.025	0							Row 3
fed-ASTA2	0/10	0/10	0/10	0/10	0/10	3/10	6/10	8/10						fed-ASTA2	0	0	0	0	0	0.3	0.6	0.8							fed-ASTA2 vs. fed-H2O	-0.1346 to 0.08459	>0.9999
	0/10	0/10	0/10	0/10	1/10	2/10	5/10	10/10							0	0	0	0	0.1	0.2	0.5	1							fed-ASTA2 vs. fed-control peptide	-0.1096 to 0.1096	>0.9999
	0/10	0/10	0/10	0/10	1/10	2/10	5/10	9/10							0	0	0	0	0.1	0.2	0.5	0.9							Row 4
	0/10	0/10	0/10	0/10	0/10	2/10	6/10	9/10							0	0	0	0	0	0.2	0.6	0.9							fed-ASTA2 vs. fed-H2O	-0.2596 to -0.04041	0.005
																													fed-ASTA2 vs. fed-control peptide	-0.2346 to -0.01541	0.0219
														mean	0	0	0	0	0.05	0.225	0.55	0.9							Row 5
														SEM	0	0	0	0	0.0288675	0.025	0.0288675	0.0408248							fed-ASTA2 vs. fed-H2O	-0.3846 to -0.1654	<0.0001
																													fed-ASTA2 vs. fed-control peptide	-0.3846 to -0.1654	<0.0001
fed-control peptide	0/10	0/10	0/10	2/10	5/10	9/10	10/10	10/10						fed-control peptide	0	0	0	0.2	0.5	0.9	1	1							Row 6
	0/10	0/10	0/10	1/10	3/10	6/10	8/10	10/10							0	0	0	0.1	0.3	0.6	0.8	1							fed-ASTA2 vs. fed-H2O	-0.5596 to -0.3404	<0.0001
	0/10	0/10	0/10	1/10	2/10	4/10	9/10	10/10							0	0	0	0.1	0.2	0.4	0.9	1							fed-ASTA2 vs. fed-control peptide	-0.4846 to -0.2654	<0.0001
	0/10	0/10	0/10	1/10	3/10	5/10	10/10	10/10							0	0	0	0.1	0.3	0.5	1	1							Row 7
																													fed-ASTA2 vs. fed-H2O	-0.4846 to -0.2654	<0.0001
														mean	0	0	0	0.125	0.325	0.6	0.925	1							fed-ASTA2 vs. fed-control peptide	-0.4846 to -0.2654	<0.0001
														SEM	0	0	0	0.025	0.0629153	0.108012	0.0478714	0							Row 8
																													fed-ASTA2 vs. fed-H2O	-0.2096 to 0.009589	0.0805
																													fed-ASTA2 vs. fed-control peptide	-0.2096 to 0.009589	0.0805
	6.25	12.5	25	50	100	200	400	800							6.25	12.5	25	50	100	200	400	800		Bonferroni's multiple comparisons test	95% confidence interval	P Value	F (DFn, DFd)		Bonferroni's multiple comparisons test	95% confidence interval	P Value	F (DFn, DFd)
ST-12h-H2O	2/10	3/10	3/10	5/10	6/10	9/10	10/10	10/10						ST-12h-H2O	0.2	0.3	0.3	0.5	0.6	0.9	1	1		ST-12h-ASTA2 vs. ST-12h-H2O	-0.2158 to -0.1217	<0.0001	F (14, 72) = 2.543		Row 1			F (14, 72) = 2.543
	2/10	3/10	4/10	5/10	8/10	10/10	10/10	10/10							0.2	0.3	0.4	0.5	0.8	1	1	1		ST-12h-ASTA2 vs. ST-12h-control peptide	-0.1315 to -0.03728	0.0002			ST-12h-ASTA2 vs. ST-12h-H2O	-0.2832 to -0.01680	0.024
	1/10	2/10	4/10	7/10	9/10	9/10	10/10	10/10							0.1	0.2	0.4	0.7	0.9	0.9	1	1							ST-12h-ASTA2 vs. ST-12h-control peptide	-0.1832 to 0.08320	0.786
	1/10	2/10	4/10	6/10	9/10	10/10	10/10	10/10							0.1	0.2	0.4	0.6	0.9	1	1	1							Row 2
																													ST-12h-ASTA2 vs. ST-12h-H2O	-0.3332 to -0.06680	0.002
														mean	0.15	0.25	0.375	0.575	0.8	0.95	1	1							ST-12h-ASTA2 vs. ST-12h-control peptide	-0.2082 to 0.05820	0.403
														SEM	0.0288675	0.0288675	0.025	0.0478714	0.0707107	0.0288675	0	0							Row 3
ST-12h-ASTA2	0/10	0/10	0/10	1/10	4/10	8/10	10/10	10/10						ST-12h-ASTA2	0	0	0	0.1	0.4	0.8	1	1							ST-12h-ASTA2 vs. ST-12h-H2O	-0.4332 to -0.1668	<0.0001
	0/10	1/10	1/10	2/10	4/10	7/10	9/10	10/10							0	0.1	0.1	0.2	0.4	0.7	0.9	1							ST-12h-ASTA2 vs. ST-12h-control peptide	-0.3082 to -0.04180	0.0072
	0/10	0/10	1/10	3/10	7/10	10/10	10/10	10/10							0	0	0.1	0.3	0.7	1	1	1							Row 4
	0/10	1/10	1/10	4/10	6/10	10/10	10/10	10/10							0	0.1	0.1	0.4	0.6	1	1	1							ST-12h-ASTA2 vs. ST-12h-H2O	-0.4582 to -0.1918	<0.0001
																													ST-12h-ASTA2 vs. ST-12h-control peptide	-0.3332 to -0.06680	0.002
														mean	0.0057735	0.0457735	0.065	0.209574	0.434142	0.705774	0.78	0.8							Row 5
														SEM	0.0057735	0.0227566	0.0217945	0.0642981	0.107843	0.178921	0.195959	0.2							ST-12h-ASTA2 vs. ST-12h-H2O	-0.4082 to -0.1418	<0.0001
ST-12h-control peptide	1/10	1/10	2/10	5/10	8/10	9/10	10/10	10/10						ST-12h-control peptide	0.1	0.1	0.2	0.5	0.8	0.9	1	1							ST-12h-ASTA2 vs. ST-12h-control peptide	-0.3082 to -0.04180	0.0072
	0/10	1/10	3/10	4/10	6/10	9/10	10/10	10/10							0	0.1	0.3	0.4	0.6	0.9	1	1							Row 6
	0/10	0/10	2/10	3/10	7/10	8/10	9/10	10/10							0	0	0.2	0.3	0.7	0.8	0.9	1							ST-12h-ASTA2 vs. ST-12h-H2O	-0.2082 to 0.05820	0.403
	1/10	3/10	3/10	6/10	7/10	9/10	10/10	10/10							0.1	0.3	0.3	0.6	0.7	0.9	1	1							ST-12h-ASTA2 vs. ST-12h-control peptide	-0.1332 to 0.1332	>0.9999
																													Row 7
														mean	0.05	0.125	0.25	0.45	0.7	0.875	0.975	1							ST-12h-ASTA2 vs. ST-12h-H2O	-0.1582 to 0.1082	>0.9999
														SEM	0.0288675	0.0629153	0.0288675	0.0645497	0.0408248	0.025	0.025	0							ST-12h-ASTA2 vs. ST-12h-control peptide	-0.1332 to 0.1332	>0.9999
																													Row 8
																													ST-12h-ASTA2 vs. ST-12h-H2O	-0.1332 to 0.1332	>0.9999
																													ST-12h-ASTA2 vs. ST-12h-control peptide	-0.1332 to 0.1332	>0.9999

## Sheet: B
	H2O001-1.tif	H2O002-1.tif	H2O003-1.tif	H2O004-1.tif	H2O005-1.tif	H2O0006-1.tif				H2O001-1.tif	H2O002-1.tif	H2O003-1.tif	H2O004-1.tif	H2O005-1.tif	H2O0006-1.tif				ASTA-1.tif	ASTA001-1.tif	ASTA002-1.tif	ASTA003-1.tif	ASTA005-1.tif	ASTA006-1.tif					ASTA-1.tif	ASTA001-1.tif	ASTA002-1.tif	ASTA003-1.tif	ASTA005-1.tif	ASTA006-1.tif				peak
time（sec）	raw data	raw data	raw data	raw data	raw data	raw data				F/F0	F/F0	F/F0	F/F0	F/F0	F/F0				raw data	raw data	raw data	raw data	raw data	raw data					F/F0	F/F0	F/F0	F/F0	F/F0	F/F0				H2O	ASTA
0	22.7451	20.8096	39.9962	46.9331	85.622	11.5748				-0.072648	0.0578027	0.135687	0.0011362	-0.0230743	-0.0742087				32.7778	59.7329	23.2962	28.3754	9.7559	24.0987					-0.254118	-0.0741794	-0.266421	-0.0552745	-0.157188	0.0665732				1.59042	1.01219
1	24.5658	19.5688	34.3846	46.8419	87.7278	11.8405				0.00158465	-0.00527022	-0.0236537	-0.000809197	0.000952353	-0.0529571				35.3575	62.9716	28.5038	33.2525	9.3729	21.4737					-0.195415	-0.0239816	-0.102438	0.107103	-0.190276	-0.0496055				1.08926	0.528795
2	20.5742	22.7821	26.2038	44.0699	93.5317	13.3555				-0.161159	0.15807	-0.255946	-0.0599391	0.0671734	0.0682177				37.9054	63.207	37.6077	33.4585	13.7797	23.0943					-0.137436	-0.0203331	0.184236	0.113961	0.190427	0.0221199				1.39117	1.26274
3	24.7059	21.7752	33.7846	36.6657	86.0155	9.897				0.00729674	0.106886	-0.0406906	-0.217879	-0.0185846	-0.208405				38.6491	60.8097	36.8654	31.9269	11.939	25.2083					-0.120512	-0.0574897	0.160862	0.0629685	0.0314094	0.115682				1.10718	0.37091
4	22.2969	20.0894	32.7962	47.7264	94.8195	11.3322				-0.0909218	0.0211931	-0.0687561	0.0180582	0.0818669	-0.0936126				37.4598	61.222	25.3962	25.2724	8.2102	26.8114					-0.147576	-0.0510993	-0.200294	-0.158585	-0.290721	0.186633				0.879519	0.974079
5	23.8319	14.9839	41.2423	43.0182	93.8392	16.0764				-0.0283376	-0.238332	0.17107	-0.0823731	0.0706819	0.285844				37.9714	59.6494	32.9115	27	8.7898	20.1996					-0.135934	-0.0754736	0.0363565	-0.101067	-0.24065	-0.105995				1.80818	1.02667
6	23.6947	25.4748	33.45	46.7416	84.33	8.7276				-0.0339314	0.294946	-0.0501915	-0.00294871	-0.0378157	-0.301937				39.7426	67.9683	41.5077	35.2625	14.0102	17.0811					-0.095629	0.0534639	0.307044	0.174023	0.21034	-0.244016
7	19.9048	18.8761	24.1038	47.4195	80.8956	13.6412				-0.188451	-0.0404819	-0.315576	0.0115117	-0.0770013	0.0910689				37.8966	67.7746	27.5885	31.7309	9.1458	21.3246					-0.137636	0.0504617	-0.13126	0.0564429	-0.209895	-0.0562044			Mean	1.31096	0.862565
8	17.7535	17.9106	39.0654	45.9574	88.4457	11.2392				-0.276163	-0.0895606	0.109257	-0.0196766	0.00914341	-0.101051				42.6095	62.4324	34.5846	30.3389	10.2576	25.1513					-0.0303907	-0.0323389	0.0890411	0.0100979	-0.113847	0.11316			TTEST		0.0475757
9	24.5714	20.883	41.4423	42.5532	83.7461	10.711				0.00181297	0.0615338	0.176749	-0.092292	-0.0444779	-0.143298				35.7789	66.2421	35.0462	36.2724	11.5559	29.5022					-0.185826	0.026709	0.103577	0.207647	-0.00168662	0.305724
10	20.1064	17.2592	30.9731	43.769	83.8025	10.6877				-0.180232	-0.122673	-0.120523	-0.0663576	-0.0438343	-0.145162				33.9109	63.2187	38.4731	29.1395	11.3661	22.4342					-0.228333	-0.0201518	0.211487	-0.0298347	-0.0180834	-0.00709516
11	26.1541	24.0115	28.2077	44.2766	89.1481	12.4385				0.066342	0.220563	-0.199046	-0.05553	0.0171576	-0.00512707				34.5512	64.2788	30.0308	28.6545	11.8136	32.1886					-0.213763	-0.0037209	-0.0543544	-0.0459822	0.0205761	0.42462
12	26.6611	21.6032	28.3808	49.9331	79.1001	13.9502				0.0870132	0.0981433	-0.194131	0.0651296	-0.0974876	0.115784				43.8229	68.0885	33.0538	27.4452	11.8203	23.9167					-0.00277889	0.0553269	0.0408374	-0.0862444	0.0211549	0.0585181
13	22.1232	17.0321	30.1769	41.5623	77.1058	16.3721				-0.0980038	-0.134217	-0.143131	-0.113429	-0.120242	0.309495				37.7371	58.3472	35.0731	25.9734	13.9864	28.4254					-0.141266	-0.0956568	0.104424	-0.135246	0.208284	0.258067
14	23.605	18.5023	32.9462	40.8875	86.7123	10.99				-0.0375886	-0.059483	-0.0644969	-0.127823	-0.0106342	-0.120983				41.6106	65.5476	26.4462	33.0332	13.2915	28.4298					-0.0531213	0.0159447	-0.167231	0.0998014	0.148252	0.258261
15	31.1905	18.4495	32.7615	34.4012	89.2003	14.8439				0.271684	-0.062167	-0.0697414	-0.266183	0.0177532	0.187265				40.0869	64.788	28.9231	28.3389	13.3864	20.5263					-0.0877942	0.00417136	-0.089235	-0.0564897	0.15645	-0.091536			P value	0.0476
16	22.395	17.6606	32.9346	44.4043	87.9337	12.2558				-0.0869221	-0.102269	-0.0648262	-0.052806	0.00330162	-0.01974				44.0231	59.6528	27.6077	28.3322	10.8	21.8509					0.0017768	-0.0754209	-0.130656	-0.0567128	-0.0669888	-0.0329112			95% confidence interval	-0.8910 to -0.005818
17	23.8711	21.8096	40.7846	38.4164	103.113	18.2525				-0.0267393	0.108635	0.158073	-0.180535	0.176491	0.459896				40.7382	64.0518	26.9962	32.711	17.7322	16.3662					-0.0729734	-0.00723925	-0.149911	0.0890742	0.531883	-0.275656			F, DFn, Dfd	1.058, 5, 5
18	26.3305	19.3257	33.7731	52.3222	77.8533	13.0332				0.0735341	-0.0176276	-0.0410171	0.116092	-0.111713	0.042439				41.5325	70.2237	26.8269	31.9734	11.7525	29.0789					-0.0548986	0.0884211	-0.155243	0.0645167	0.0152976	0.28699
19	25.535	22.6216	38.3154	42.003	94.9351	10.6478				0.0411004	0.149911	0.0879609	-0.104028	0.0831859	-0.148353				36.3619	62.4658	33.8615	25.5183	15.9695	21.2675					-0.172559	-0.0318212	0.0662713	-0.150398	0.379604	-0.0587316
20	30.3193	17.0803	32.0962	44.0973	92.4979	6.7575				0.236164	-0.131767	-0.0886325	-0.0593546	0.055378	-0.459512				40.1408	71.1085	31.1308	42.4485	11.8712	26.2763					-0.0865677	0.102135	-0.0197163	0.413273	0.0255521	0.162951
21	21.9468	16.0665	36.2154	39.766	90.7828	14.9767				-0.105196	-0.183301	0.0283316	-0.151746	0.0358091	0.197887				38.4719	64.222	32.3115	28.9402	11.7322	24.364					-0.124545	-0.00460126	0.017463	-0.0364702	0.0135439	0.078315
22	27.3389	15.695	29.2769	49.9666	89.3456	14.0565				0.114648	-0.202185	-0.168686	0.0658442	0.019411	0.124286				43.5325	62.9215	29.7423	26.4319	13.0169	23.6557					-0.00938715	-0.0247582	-0.063439	-0.119981	0.124529	0.0469666
23	19.5434	22.7638	23.65	47.2219	86.2666	14.1728				-0.203186	0.157139	-0.328461	0.00729663	-0.0157196	0.133588				40.4037	61.8948	30.8154	27.4153	11.5085	22.7325					-0.0805852	-0.0406713	-0.029648	-0.0872399	-0.0057815	0.00610716
24	30.6919	16.0413	31.5192	48.4681	76.3766	10.7375				0.251355	-0.184582	-0.105016	0.0338795	-0.128562	-0.141179				42.3179	58.1269	25.3	26.6545	10.9017	22.5088					-0.0370262	-0.0990713	-0.203323	-0.11257	-0.0582029	-0.00379347
25	24.0168	19.406	41.5769	38.9271	80.2722	13.4751				-0.0207989	-0.0135457	0.180571	-0.169641	-0.0841142	0.0777837				45.5644	77.8982	43.8385	29.6346	15.7729	22.8443					0.0368502	0.207371	0.380439	-0.0133509	0.36262	0.0110553
26	26.5686	21.3716	33.2038	42.2036	88.9168	18.0432				0.0832418	0.0863705	-0.0571824	-0.0997494	0.0145185	0.443156				36.5424	60.8397	34.2692	22.9336	10.1932	24.1798					-0.168452	-0.0570247	0.0791094	-0.236453	-0.11941	0.0701625
27	20.1709	17.1904	34.5885	41.2128	89.0042	11.9568				-0.177602	-0.12617	-0.017864	-0.120884	0.0155158	-0.043655				39.3058	59.571	31.5808	33.7874	10.6949	27.4671					-0.105569	-0.0766887	-0.00554614	0.124912	-0.0760683	0.215654
28	28.4706	18.0528	32.3654	46.693	86.8223	14.4618				0.160789	-0.0823322	-0.0809886	-0.0039854	-0.00937918	0.156703				43.6645	62.0568	41.4269	32.701	10.7898	28.3465					-0.00638339	-0.0381604	0.3045	0.0887412	-0.0678699	0.254575
29	27.5434	20.8486	37.2192	43.0395	89.1932	8.3455				0.122986	0.0597851	0.0568344	-0.0819187	0.0176722	-0.332499				41.044	66.6361	24.7654	30.0731	9.4136	16.5175					-0.0660147	0.0328157	-0.220158	0.00124841	-0.18676	-0.26896
30	18.8095	21.305	38.1692	50.1155	88.1552	11.8272				-0.233108	0.0829851	0.0838095	0.0690204	0.00582888	-0.0540209				38.2002	64.0634	22.5423	39.8239	10.6102	21.9057					-0.130727	-0.00705946	-0.290161	0.32589	-0.0833856	-0.0304858
31	26.3081	23.7959	34.35	47.155	88.7701	11.1894				0.0726208	0.209604	-0.0246361	0.00586958	0.0128447	-0.105034				43.2101	68.4641	38.4	27.9568	14.3254	20.7544					-0.0167236	0.0611485	0.209185	-0.0692113	0.23757	-0.0814406
32	27.944	11.0986	32.7885	37.234	92.8604	11.7841				0.139319	-0.435831	-0.0689747	-0.205757	0.059514	-0.0574682				53.758	67.6377	27.0615	35.7043	12.3729	16.7741					0.223301	0.0483398	-0.147855	0.188733	0.068894	-0.257603
33	24.395	17.3532	56.1115	49.4529	85.7743	10.7209				-0.00537912	-0.117895	0.593279	0.0548864	-0.0213366	-0.142506				37.3806	73.0367	29.3192	26.6611	12.3119	18.8048					-0.149378	0.132021	-0.0767621	-0.11235	0.0636242	-0.167727
34	29.5378	19.6651	33.2808	47.6505	74.1777	15.3854				0.204301	-0.000375059	-0.0549959	0.0164392	-0.153651	0.230576				46.8042	62.3322	32.2808	20.1827	12.3661	19.5504					0.0650627	-0.0338919	0.0164963	-0.328041	0.0683065	-0.134728
35	30.3333	21.4151	34.95	42.0912	90.8942	17.9468				0.236734	0.0885817	-0.00759922	-0.102147	0.0370802	0.435445				40.9769	65.1503	24.3615	33.9136	12.3288	20.6513					-0.0675416	0.00978678	-0.232876	0.129113	0.0650842	-0.0860037
36	24.5182	19.078	40.6692	43.0547	91.5063	12.9103				-0.000356071	-0.0302188	0.154797	-0.0815945	0.0440641	0.0326091				50.5765	62.3773	33.6077	35.4851	11.9085	23.5482					0.150904	-0.0331929	0.0582793	0.181435	0.0287745	0.0422088
37	28.1821	20.6193	36.1923	48.769	91.677	7.2027				0.149027	0.0481293	0.0276757	0.040298	0.0460117	-0.423904				53.275	61.222	24.5808	32.4851	6.8915	22.6579					0.21231	-0.0510993	-0.22597	0.0815531	-0.404644	0.00280547
38	25.7227	17.9495	44.9385	55.7872	90.7884	10.0033				0.0487532	-0.0875832	0.276023	0.190004	0.035873	-0.199903				49.6007	61.6177	31.5231	28.7508	11.6508	18.1118					0.128699	-0.0449662	-0.00736307	-0.042776	0.00651178	-0.198398
39	26.8067	22.789	50.4077	51.1337	77.8787	12.1495				0.0929495	0.15842	0.43132	0.0907398	-0.111423	-0.0282423				46.0143	59.4674	33.1154	26.2226	9.1119	23.0614					0.047088	-0.0782944	0.0427772	-0.126949	-0.212824	0.0206638
40	23.5126	20.4266	31.6115	40.0881	77.7038	13.206				-0.0413559	0.0383338	-0.102396	-0.144875	-0.113419	0.0562602				51.6304	73.5659	35.3423	26.1561	13.6	21.7061					0.174886	0.140223	0.1129	-0.129163	0.174903	-0.0393198
41	20.9412	14.2752	43.2192	56.7173	78.378	9.3223				-0.146196	-0.274357	0.227204	0.209844	-0.105727	-0.254371				44.0374	77.3356	30.7269	25.2226	13.7695	23.5175					0.00210221	0.198651	-0.0324348	-0.160243	0.189546	0.0408501
42	23.0812	19.8578	34.1769	52.1429	93.1721	15.0664				-0.0589447	0.00942035	-0.0295513	0.112267	0.0630705	0.205061				55.3773	68.3139	32.1192	28.2326	6.7559	18.0395					0.26015	0.0588205	0.0114076	-0.0600289	-0.416358	-0.201598
43	24.8627	15.7454	32.8077	52.3495	86.1946	10.4352				0.0136897	-0.199623	-0.0684296	0.116674	-0.0165411	-0.165358				44.6799	68.5559	28.9423	38.1628	10.722	21.9057					0.0167228	0.0625713	-0.0886304	0.270585	-0.0737272	-0.0304858
44	22.1597	23.1147	36.7731	49.8237	89.6333	12.8405				-0.0965157	0.174977	0.0441675	0.062796	0.0226936	0.0270262				47.2728	61.4541	25.9231	36.1229	15.0407	25.3136					0.075726	-0.0475019	-0.183703	0.202669	0.299365	0.120343
45	23.2941	18.1376	33.1385	50.8632	85.1086	7.0598				-0.0502645	-0.0780216	-0.0590365	0.0849697	-0.0289321	-0.435334				46.2607	68.793	33.6423	27.3389	8.7559	19.6623					0.052695	0.0662462	0.0593688	-0.0897836	-0.243578	-0.129775
46	24.1765	21.6284	32.4269	57.4742	93.6107	14.8073				-0.0142877	0.0994243	-0.0792423	0.22599	0.0680748	0.184337				43.2189	61.7412	26.7577	24.1096	12.4881	20.3158					-0.0165233	-0.043052	-0.157422	-0.197299	0.0788461	-0.100852
47	24.1849	12.7936	39.8846	64.7538	92.2003	14.691				-0.0139452	-0.34967	0.132518	0.381272	0.0519825	0.175035				51.5644	79.0351	37.0731	28.0797	6.4102	18.0943					0.173384	0.224992	0.167402	-0.0651195	-0.446223	-0.199173
48	18.8824	27.6376	30.0846	50.9392	88.7221	11.1827				-0.230136	0.404887	-0.145752	0.0865909	0.0122971	-0.10557				51.1562	68.0785	33.3769	31.6146	8.5492	19.057					0.164096	0.0551719	0.0510116	0.0525708	-0.261435	-0.156565
49	24.1765	20.6078	38.4385	54.7781	93.1298	14.4252				-0.0142877	0.0475447	0.0914563	0.168479	0.0625878	0.153776				51.6942	74.7346	37.1962	29.309	12.4847	27.6952					0.176338	0.158337	0.171278	-0.0241914	0.0785523	0.225749
50	22.1204	24.6583	26.0231	47.4559	86.3047	12.0299				-0.098118	0.253441	-0.261077	0.0122881	-0.0152849	-0.0378083				48.0594	60.8147	38.8346	24.3555	13.5017	18.5088					0.0936257	-0.0574122	0.22287	-0.189112	0.166411	-0.180828
51	30.7787	16.9289	36.4038	64.4012	95.8519	11.6811				0.254894	-0.139463	0.0336812	0.373751	0.0936463	-0.0657065				47.725	66.6978	28.65	29.8837	16.5017	19.7083					0.0860162	0.033772	-0.0978347	-0.00505744	0.425581	-0.12774
52	23.5238	17.1927	31.3692	40.6444	85.2299	15.0432				-0.0408993	-0.126053	-0.109276	-0.133009	-0.0275481	0.203206				49.725	68.0735	24.5154	34.0963	9.4712	25.1316					0.131528	0.0550945	-0.22803	0.135196	-0.181784	0.112288
53	24.5518	17.5092	38.6731	45.5775	101.107	11.4452				0.00101385	-0.109965	0.0981177	-0.0277803	0.153608	-0.0845745				49.7151	68.3923	39.8231	32.8538	12.1288	20.4386					0.131302	0.0600356	0.253997	0.0938285	0.0478062	-0.0954175
54	22.1064	20.8807	36.8808	51.8602	87.8364	8.6512				-0.0986888	0.0614169	0.0472256	0.106237	0.00219145	-0.308048				52.1881	51.9599	45.4577	28.6744	12.8271	22.989					0.187577	-0.194656	0.431426	-0.0453197	0.108132	0.0174595
55	30.2157	19.3716	33.45	52.5441	87.7786	16.7309				0.23194	-0.0152944	-0.0501915	0.120825	0.00153197	0.338193				52.3322	54.5175	38.5885	27.2724	12.478	24.0461					0.190856	-0.155015	0.215121	-0.0919976	0.0779735	0.0642452
56	26.5182	21.8853	35.0538	52.1672	102.56	10				0.0811869	0.112483	-0.00465184	0.112785	0.170183	-0.200166				47.9054	63.3139	26.3962	24.9336	9.1458	17.2873					0.0901213	-0.0186762	-0.168805	-0.169865	-0.209895	-0.234889
57	20.4202	23.9312	39.3	48.5866	84.4584	11.4352				-0.167438	0.216481	0.115918	0.0364072	-0.0363507	-0.0853744				58.8361	54.9633	27.2346	31.8239	10.2373	25.8772					0.338857	-0.148105	-0.142404	0.0595392	-0.1156	0.145287
58	26.3613	19.961	37.8077	45.769	83.2313	16.9801				0.0747899	0.0146663	0.0735448	-0.0236954	-0.0503516	0.358125				49.3861	61.9316	36.6154	36.8073	14.2136	23.3355					0.123816	-0.040101	0.152989	0.225456	0.227912	0.0327951
59	23.9636	22.7913	36.2423	39.9119	76.6107	13.1528				-0.0229679	0.158537	0.0290955	-0.148634	-0.125891	0.052005				52.6282	55.5426	25.6269	24.8704	6.9356	19.8991					0.197592	-0.139126	-0.19303	-0.171969	-0.400834	-0.119295
60	21.8487	24.5619	41.3	50.0091	98.4753	14.2757				-0.109196	0.248541	0.172708	0.0667508	0.123579	0.141818				52.538	62.2988	56.5154	31.0498	13.2915	37.4342					0.195539	-0.0344096	0.779624	0.0337665	0.148252	0.656783
61	41.8039	27.4174	64.1692	60.2857	153.835	18.9601				0.704408	0.393693	0.822076	0.285962	0.755219	0.516492				76.2706	66.4407	48.0654	33.6944	13.461	45.7917					0.735591	0.0297871	0.513541	0.121815	0.162895	1.02667
62	56.2381	41.1009	58.1654	43.7994	139.677	35.1096				1.29291	1.08926	0.651599	-0.0657092	0.59368	1.80818				73.1782	95.4474	71.8577	41.1761	10.2915	40.2456					0.665222	0.479372	1.26274	0.37091	-0.110918	0.781211
63	43.3165	38.4748	54.7385	63.4255	121.989	24.103				0.766079	0.955768	0.554293	0.352938	0.391861	0.927839				88.4257	91.9366	52.3885	31.0997	22.8508	42.2215					1.01219	0.424957	0.649672	0.0354278	0.974079	0.868662
64	60.0616	38.1216	75.6731	91.3587	146.261	15.1794				1.4488	0.937814	1.14873	0.948785	0.6688	0.214099				82.5468	91.0952	49.6577	32.7508	19.7593	41.7763					0.878411	0.411916	0.563681	0.0903993	0.707005	0.848958
65	63.535	40.1972	79.9077	80.4073	142.827	16.4086				1.59042	1.04332	1.26897	0.715179	0.629615	0.312415				81.0308	94.4524	45.2077	26.392	17.2508	31.7544					0.843913	0.46395	0.423554	-0.121309	0.490295	0.405403
66	53.7815	37.8899	63.4077	98.7842	155.889	14.7575				1.19275	0.926036	0.800454	1.10718	0.77865	0.180354				72.3091	85.5326	49.8346	28.6645	18.9356	30.9737					0.645445	0.325699	0.569251	-0.0456493	0.635845	0.370851
67	60.7507	30.7913	66.05	85.8085	131.92	13.5183				1.4769	0.565197	0.875481	0.830393	0.50517	0.081239				69.9769	97.1586	44.2269	31.3654	15.4983	29.2851					0.592374	0.505894	0.392669	0.044274	0.338897	0.296116
68	41.493	31.9151	84.2115	75.5957	128.406	12.1462				0.691732	0.622322	1.39117	0.612542	0.465083	-0.0285062				58.538	98.6361	42.2	30.7807	11.6508	32.443					0.332074	0.528795	0.328844	0.0248071	0.00651178	0.43588
69	55.5042	27.9954	63.4538	70.7143	164.729	13.1262				1.26299	0.423074	0.801763	0.508416	0.879519	0.0498775				65.5303	79.4992	33.7808	21.1827	16.8237	33.8553					0.491188	0.232185	0.0637301	-0.294747	0.453398	0.498386
70	42.493	38.1101	74.2346	95.1641	152.31	14.9767				0.732504	0.937229	1.10788	1.02996	0.737823	0.197887				68.5347	66.1503	37.5038	32.0698	12.9763	33.0592					0.559556	0.0252861	0.180964	0.0677262	0.121022	0.463152
71	30.0896	25.7248	56.1154	88.535	151.334	17.8007				0.226798	0.307654	0.59339	0.888552	0.726687	0.42376				53.8548	77.4207	34.9423	22.7807	12.0203	35.4123					0.225504	0.19997	0.100305	-0.241543	0.0384329	0.567297
72	36.0756	28.6995	58.0769	74.5502	126.413	8.99				0.470857	0.458866	0.649086	0.59024	0.442344	-0.28095				61.1947	76.8063	32.1077	20.4385	10.5898	21.0658					0.392529	0.190447	0.0110455	-0.319524	-0.0851479	-0.0676585
73	39.6639	26.1927	58.7769	75.2371	123.251	16.6346				0.617157	0.331439	0.668963	0.604893	0.406264	0.330491				59.1034	72.7613	32.0692	24.7276	12.4203	21.0461					0.34494	0.127752	0.00983318	-0.176724	0.0729888	-0.0685304
74	37.7815	27.4908	62.9654	74.8967	127.023	12.3987				0.540409	0.397424	0.787894	0.597631	0.449296	-0.0083104				53.4301	66.1252	24.5615	13.8073	11.6847	28.2193					0.21584	0.0248971	-0.226578	-0.540302	0.0094404	0.248945
75	41.1008	26.3578	50.9077	66.6778	126.468	17.3389				0.675741	0.339831	0.445518	0.422313	0.442972	0.386823				58.7976	69.6427	25.4154	24.9867	14.4475	26.6338					0.337981	0.079416	-0.19969	-0.168097	0.248118	0.178773
76	38.8543	25.5803	50.9077	74.307	120.018	15.0498				0.584148	0.300309	0.445518	0.585053	0.369379	0.203733				49.0484	72.4858	30.7615	17.5083	12.2034	21.8509					0.116131	0.123482	-0.0313452	-0.417082	0.0542509	-0.0329112
77	39.8039	23.0023	51.0615	88.8541	117.416	14.5615				0.622865	0.169263	0.449885	0.895359	0.339688	0.164678				43.0704	69.0117	28.8962	17.2425	9.7322	24.1667					-0.0199026	0.0696359	-0.090082	-0.425931	-0.159236	0.0695828
78	30.1008	24.9587	50.4846	80.2644	117.797	15.5482				0.227255	0.268712	0.433504	0.712131	0.344033	0.243597				45.176	63.187	37.3615	23.1661	10.3288	26.1996					0.0280119	-0.0206431	0.176483	-0.228712	-0.107696	0.159556
79	25.8599	27.5436	47.8769	76.1763	105.662	8.6312				0.0543471	0.400108	0.359458	0.624927	0.205571	-0.309648				46.6128	62.8881	32.0885	18.2625	10.0475	30.0066					0.0607073	-0.0252758	0.0104409	-0.391972	-0.131997	0.328048
80	32.6134	22.0275	46.2654	65.7751	105.051	9.7409				0.329697	0.119711	0.3137	0.403057	0.198603	-0.22089				51.3212	63.5259	21.8577	20.5282	8.1525	24.114					0.16785	-0.0153904	-0.311719	-0.316538	-0.295706	0.0672503
81	27.028	19.055	55.6615	58	106.993	10.4684				0.101972	-0.0313879	0.580501	0.237206	0.220763	-0.162702				48.7019	70.7062	26.2077	27.3056	12.1864	23.4539					0.108246	0.0958996	-0.174741	-0.0908922	0.0527822	0.0380353
82	30.6218	20.4243	54.8731	70.3891	102.597	16.691				0.248497	0.0382169	0.558115	0.501479	0.170602	0.335002				47.2695	55.9967	20.9077	21.5748	11.8881	21.989					0.0756509	-0.132088	-0.341633	-0.281692	0.0270121	-0.0267991
83	31.1148	22.3945	54.3231	74.2432	100.353	17.4518				0.268597	0.138367	0.542497	0.583692	0.144998	0.395853				45.2519	74.823	31.9308	28.1395	8.2271	24.1053					0.029739	0.159707	0.00547508	-0.0631285	-0.289261	0.0668653
84	32.2969	13.078	51.7692	58.459	101.846	8.0498				0.316793	-0.335213	0.46998	0.246997	0.162041	-0.35615				47.7833	73.1586	28.3115	23.7409	13.3797	19.8421					0.0873428	0.13391	-0.108494	-0.209575	0.155871	-0.121818
85	26.6162	19.1124	39	47.924	104.478	13.6013				0.0851825	-0.0284701	0.1074	0.0222732	0.192069	0.0878776				43.3916	67.616	34.1808	23.9468	9.9153	29.0768					-0.0125934	0.0480035	0.0763258	-0.20272	-0.143418	0.286897
86	26.0056	20.5206	34.8	43.1824	97.6559	9.3522				0.0602875	0.0431121	-0.0118585	-0.0788705	0.11423	-0.25198				47.5457	70.4725	21.2885	26.6777	15.0407	21.6645					0.0819361	0.0922774	-0.329642	-0.111797	0.299365	-0.041161
87	25.1317	16.7683	34.2385	61.6444	97.9013	14.0897				0.0246572	-0.147626	-0.0278022	0.314945	0.117029	0.126941				45.4785	65.9249	34.1923	13.6578	7.4271	26.875					0.0348955	0.0217926	0.0766879	-0.54528	-0.358373	0.189448
88	25.451	20.1881	40.5423	46.5471	102.006	17.2924				0.0376756	0.0262103	0.151193	-0.00709761	0.163858	0.383104				44.747	62.5576	24.95	22.3488	13.0407	24.6513					0.0182497	-0.0303984	-0.214345	-0.255923	0.126585	0.0910304
89	22.0868	14.0092	43.8385	50.2188	104.004	11.3953				-0.0994879	-0.287878	0.244789	0.0712239	0.186662	-0.0885657				46.4158	73.4574	27.2269	18.8638	11.3525	25.4781					0.0562244	0.138541	-0.142647	-0.371952	-0.0192583	0.127623
90	24.8403	16.4771	35.9269	59.0578	95.8858	14.9236				0.0127764	-0.162429	0.0201397	0.25977	0.0940331	0.19364				39.5391	73.3639	20.2654	23.3854	7.5085	27.8289					-0.10026	0.137092	-0.361859	-0.221411	-0.351341	0.231666
91	24.3305	18.6193	31.7077	54.8663	100.622	15.2326				-0.00800888	-0.0535356	-0.0996639	0.17036	0.148072	0.218354				52.1133	83.8347	25.9423	19.1096	9.6373	16.511					0.185875	0.299383	-0.183098	-0.363768	-0.167434	-0.269247
92	29.5714	19.8096	41.3615	51.4681	101.984	11.3322				0.205671	0.00697023	0.174454	0.0978729	0.163618	-0.0936126				43.1738	75.1469	29.1	15.7409	10.2102	21.8684					-0.0175496	0.164727	-0.0836645	-0.475925	-0.117942	-0.0321366
93	25.084	17.7271	41.6423	41.5866	78.2496	14.0465				0.0227124	-0.0988883	0.182428	-0.112911	-0.107192	0.123486				46.2519	66.8598	25.95	24.1694	7.522	20.7061					0.0524947	0.0362829	-0.182855	-0.195308	-0.350175	-0.0835783
94	23.6611	16.0115	38.7346	50.4164	96.5853	10.9269				-0.0353013	-0.186096	0.099864	0.0754389	0.102014	-0.12603				45.0715	70.4691	25.6385	25.1894	19.8407	17.3355					0.0256339	0.0922247	-0.192664	-0.161349	0.714037	-0.232756
95	20.7871	16.3142	29.7308	44.6657	93.8984	16.3987				-0.152479	-0.170709	-0.155798	-0.04723	0.0713574	0.311623				46.286	71.5092	19.0808	20.1196	10.3051	27.5702					0.0532707	0.108346	-0.399161	-0.330142	-0.109743	0.220217
96	18.9636	15.4243	31.1846	42.8815	86.7292	18.8704				-0.226825	-0.215945	-0.114517	-0.085289	-0.0104414	0.509318				47.4015	76.2855	26.4	20.4385	14.878	20.7829					0.0786547	0.182375	-0.168685	-0.319524	0.285309	-0.0801793
97	23.0336	22.0688	31.7346	42.4498	88.7024	10.9169				-0.0608854	0.121811	-0.0989001	-0.0944977	0.0120723	-0.12683				44.0836	68.9533	26.4731	24.4385	7.1763	23.8421					0.00315352	0.0687308	-0.166383	-0.186349	-0.38004	0.0552164
98	17.2381	17.867	36.45	46.4711	91.8251	16.4053				-0.297177	-0.0917769	0.0349931	-0.00871878	0.0477015	0.312151				44.3564	76.414	23.0923	17.5316	9.5458	23.6952					0.00936128	0.184367	-0.272842	-0.416306	-0.175339	0.0487149
99	25.3445	18.9564	29.3885	40.304	91.2891	15.8472				0.0333334	-0.0364	-0.165517	-0.14027	0.0415859	0.267512				43.0605	72.8047	23.0077	20.206	10.0576	23.7917					-0.0201278	0.128425	-0.275506	-0.327265	-0.131125	0.0529858
100	22.8319	17.6376	32.6538	38.0638	96.1199	10.6013				-0.0691091	-0.103438	-0.0727995	-0.188056	0.0967041	-0.152072				49.4092	76.9282	28.45	19.9834	9.2203	22.3596					0.124341	0.192336	-0.104132	-0.334676	-0.203459	-0.0103968
101	26.1681	14.4748	35.5154	37.6657	100.204	12.9668				0.0669128	-0.264211	0.00845524	-0.196548	0.143308	0.0371281				46.6029	70.6912	27.7692	24.1063	8.2	32.8421					0.060482	0.0956671	-0.12557	-0.197409	-0.291603	0.453543
102	21.5042	14.9839	30.9692	44.6626	95.7348	9.0963				-0.123241	-0.238332	-0.120634	-0.0472961	0.0923102	-0.272447				45.7536	76.7613	26.9923	28.7674	9.6542	23.8925					0.0411556	0.18975	-0.150034	-0.0422233	-0.165974	0.0574471
103	15.5938	14.8234	23.0308	35.1246	83.2849	16				-0.364217	-0.24649	-0.346043	-0.250752	-0.04974	0.279734				47.4059	74.793	35.8154	25.7143	9.5525	23.9518					0.0787548	0.159242	0.127798	-0.143873	-0.17476	0.0600716
104	25.5406	15.9725	36.5462	39.9544	91.4612	11.8439				0.0413287	-0.188079	0.0377247	-0.147727	0.0435495	-0.0526852				54.4279	78.9683	27.7115	25.6512	9.2847	24.5833					0.238545	0.223957	-0.127387	-0.145974	-0.197895	0.0880209
105	23.8459	14.4908	26.35	45.0821	89.2764	10.7674				-0.0277668	-0.263397	-0.251795	-0.0383477	0.0186215	-0.138787				43.5875	86.3873	19.8692	31.6113	8.1966	18.1754					-0.00813558	0.338946	-0.374335	0.052461	-0.291896	-0.195583
106	18.5742	16.2821	30.7692	38.7933	81.0522	13.6977				-0.242702	-0.172341	-0.126313	-0.172495	-0.0752146	0.095588				49.9571	78.9482	30.0154	40.5947	13.1424	17.5636					0.136809	0.223645	-0.0548393	0.351553	0.135371	-0.222661
107	13.6303	13.172	28.2692	39.9544	92.0973	14.309				-0.444272	-0.330435	-0.1973	-0.147727	0.0508073	0.144482				50.6766	81.1753	31.8731	31.9369	8.9424	22.1206					0.153182	0.258164	0.00365815	0.0633014	-0.227467	-0.0209746
108	21.6134	12.1674	34.4462	42.3769	89.8434	10.9535				-0.118789	-0.381501	-0.0219046	-0.0960527	0.0250908	-0.123902				48.7107	82.6311	27.2808	23.9369	11.8949	24.443					0.108446	0.280728	-0.14095	-0.203049	0.0275996	0.0818114
109	17.7143	13.7454	28.1385	45.5137	82.6798	14.392				-0.277761	-0.301288	-0.201011	-0.0291412	-0.0566441	0.15112				51.4103	81.4407	33.6154	28.9302	14.2373	19.5899					0.169878	0.262277	0.0585218	-0.0368031	0.229959	-0.13298
110	16.7815	12.6514	33.1192	47.0547	93.6812	13.1927				-0.315793	-0.356899	-0.0595846	0.00373007	0.0688792	0.0551964				51.3014	76.9082	34.2	18.0166	10.2169	24.9474					0.1674	0.192026	0.0769304	-0.400159	-0.117363	0.104135
111	18.1737	13.6422	30.5808	53.7872	94.1848	11.9203				-0.259031	-0.306534	-0.131662	0.147342	0.0746251	-0.0465744				51.9362	86.3155	24.1192	26.7409	9.9831	24.5724					0.181845	0.337833	-0.240506	-0.109693	-0.137561	0.0875384
112	21.6359	13.8349	34.4885	46.2158	92.7997	7.1229				-0.117872	-0.296738	-0.0207035	-0.0141646	0.0588215	-0.430287				44.3817	83.6945	26.05	38.4718	9.2102	25.1535					0.009937	0.29721	-0.179707	0.280873	-0.204331	0.113257
113	21.5434	13.9381	33.7846	41.8207	84.4429	11.7375				-0.121643	-0.291492	-0.0406906	-0.107917	-0.0365275	-0.0611954				43.7459	86.9332	34.1269	28.7508	11.0712	24.8289					-0.00453108	0.347407	0.0746285	-0.042776	-0.0435598	0.0988908
114	19.4118	21.039	28.65	38.0578	86.2877	15.5249				-0.208552	0.0694636	-0.186487	-0.188184	-0.0154788	0.241734				49.7855	76.3272	29.9192	30.4286	6.6644	26.2544					0.132904	0.183021	-0.0578686	0.0130844	-0.424263	0.161981
115	21.9076	15.9748	31.3038	43.6626	86.7024	12.9734				-0.106794	-0.187962	-0.111133	-0.0686273	-0.0107472	0.037656				45.0737	75.6477	38.65	22.4219	9.7898	20.2456					0.025684	0.17249	0.217057	-0.253489	-0.15426	-0.103959
116	26.6471	16.7454	31.2269	39.4377	83.3667	14.3654				0.0864424	-0.148791	-0.113316	-0.158749	-0.0488067	0.148993				51.495	83.192	26.5962	28.2791	19.4475	25.3575					0.171805	0.289421	-0.162507	-0.0584807	0.680068	0.122286
117	20.07	14.2294	23.1731	37.7447	90.3695	16.9767				-0.181716	-0.276685	-0.342003	-0.194863	0.0310935	0.357853				56.0891	86.808	29.0269	25.3621	8.1458	20.0285					0.276347	0.345467	-0.0859664	-0.155599	-0.296285	-0.113568
118	21.9832	17.828	37.8038	42.5623	99.7772	12.2126				-0.103712	-0.0937593	0.0734341	-0.0920979	0.138433	-0.0231953				52.099	87.3472	28.8808	26.0033	12.3593	19.3706					0.18555	0.353824	-0.090567	-0.134251	0.067719	-0.142686
119	16.112	13.7018	31.5769	35.1945	88.4175	14.5947				-0.34309	-0.303504	-0.103378	-0.249261	0.00882166	0.167333				47.4642	100.118	31.4731	25.9103	7.0169	17.1206					0.0800815	0.551771	-0.00893752	-0.137347	-0.393811	-0.242267
120	21.2269	18.2913	40.3	39.8328	88.0226	7.9568				-0.134547	-0.0702087	0.144313	-0.150321	0.00431595	-0.363588				51.4323	95.3673	27.7923	28.2027	13.0169	19.4101					0.170378	0.47813	-0.124843	-0.0610244	0.124529	-0.140937
121	23.0588	17.4954	32.0346	45.848	87.9295	10.1561				-0.059858	-0.110666	-0.0903816	-0.0220102	0.0032537	-0.187681				53.9527	84.6828	37.5385	29.8505	12.861	28.6075					0.227732	0.312528	0.182057	-0.0061628	0.111061	0.266126
122	19.958	21.0986	46.8692	33.8723	96.8632	15.711				-0.186282	0.0724932	0.330845	-0.277465	0.105185	0.256618				44.7437	75.621	34.3269	26.3522	9.8508	20.7982					0.0181746	0.172076	0.0809263	-0.122635	-0.14899	-0.0795021
123	20.8627	17.2362	39.8	43.7872	78.2214	8.1395				-0.149396	-0.123842	0.130116	-0.0659694	-0.107513	-0.348975				58.1001	95.4691	30.25	25.1894	9.3051	30.8202					0.322109	0.479708	-0.047452	-0.161349	-0.196133	0.364057
124	15.7619	10.1193	31.8846	43.0426	93.4838	14.0299				-0.357364	-0.485611	-0.0946409	-0.0818526	0.0666269	0.122158				49.8603	83.7679	33.2	23.9169	11.1288	28.0855					0.134606	0.298347	0.0454412	-0.203715	-0.0385838	0.243023
125	25.2437	15.7982	43.4962	50.4802	85.0212	13.3023				0.0292237	-0.196939	0.235069	0.0767999	-0.0299293	0.0639626				51.6986	84.3723	33.9692	21.8771	16.078	28.3311					0.176438	0.307715	0.0696626	-0.271628	0.388977	0.253893
126	25.6807	16.5826	31.3038	52.6444	83.6671	13.1429				0.0470408	-0.157066	-0.111133	0.122965	-0.0453792	0.0512132				59.1562	83.1803	36.3808	27.6777	13.7593	24.4364					0.346141	0.28924	0.145602	-0.0785036	0.188665	0.0815193
127	19.8543	16.9862	40.3692	39.307	83.9365	9.0365				-0.19051	-0.13655	0.146278	-0.161537	-0.0423054	-0.27723				49.7107	81.9549	31.6154	21.9867	13.8169	24.2807					0.131202	0.270247	-0.00445661	-0.267979	0.193641	0.0746282
128	19.3838	14.9083	24.7115	39.2553	96.3695	14.7641				-0.209693	-0.242175	-0.29832	-0.16264	0.099552	0.180882				52.5743	86.0117	37.2615	26.2259	10.1458	22.5789					0.196365	0.333125	0.173335	-0.12684	-0.123505	-0.00069095
129	19.5154	14.594	41.4077	40.3435	91.3738	14.5282				-0.204328	-0.258151	0.175766	-0.139427	0.0425523	0.162014				49.5347	84.0901	27.25	29.3787	11.1288	21.0899					0.127197	0.303341	-0.14192	-0.0218708	-0.0385838	-0.0665919
130	20.6527	17.2729	34.9692	36.9149	90.0832	11.1395				-0.157958	-0.121976	-0.00705404	-0.212563	0.0278269	-0.109025				52.022	79.6294	42.9192	32.7542	8.9763	22.011					0.183797	0.234203	0.351491	0.0905125	-0.224538	-0.0258254
131	15.7507	11.9702	40.1923	46.5684	95.1805	9.3488				-0.35782	-0.391526	0.141255	-0.00664326	0.0859858	-0.252252				47.1694	92.0534	33.7462	29.1462	12.8441	26.6009					0.0733731	0.426767	0.0626406	-0.0296116	0.109601	0.177317
132	17.4398	14.1422	43.3577	31.5532	91.4175	10.9601				-0.288953	-0.281118	0.231136	-0.326934	0.0430509	-0.123374				58.3608	78.5042	35.8154	19.9934	14.3966	24.4912					0.328041	0.216763	0.127798	-0.334343	0.243721	0.0839446
133	19.1597	13.078	38.8577	32.9483	87.1001	8.9801				-0.21883	-0.335213	0.103359	-0.297175	-0.00620955	-0.281741				46.3971	80.0317	29.0115	23.0033	14.5932	21.2171					0.0557989	0.240439	-0.0864513	-0.234132	0.260706	-0.0609622
134	17.2325	17.5344	29.4769	44.4894	83.5557	11.6047				-0.297405	-0.108684	-0.163007	-0.0509907	-0.0466503	-0.0718172				55.066	80.3072	32.0308	21.9535	14.7186	22.9868					0.253066	0.244709	0.008624	-0.269084	0.271539	0.0173621
135	16.6639	19.1353	35.85	39.2067	87.1552	11.6578				-0.320588	-0.0273061	0.0179562	-0.163677	-0.00558087	-0.0675701				43.7998	84.7947	35.0615	21.1262	12.2339	23.943					-0.00330455	0.314262	0.104058	-0.296628	0.0568858	0.0596821
136	19.2549	12.8761	35.6154	42.8116	86.0606	12.8073				-0.214949	-0.345476	0.0112947	-0.0867801	-0.01807	0.0243708				59.253	77.5108	38.6077	18.7542	10.7525	24.6075					0.348344	0.201366	0.215725	-0.375601	-0.0710923	0.0890919
137	19.084	16.5344	42.4	31.2948	94.6544	9.5515				-0.221917	-0.159516	0.203943	-0.332446	0.0799831	-0.236039				51.7426	93.0985	37.8231	19.3688	10.1153	25.6579					0.177439	0.442965	0.191019	-0.355139	-0.12614	0.135581
138	24.2857	13.0849	37.5577	38.6383	87.7334	12.9369				-0.00983545	-0.334863	0.0664461	-0.175801	0.00101625	0.0347366				49.7415	90.7496	30.1577	26.9402	9.7254	21.3925					0.131903	0.406559	-0.0503584	-0.103058	-0.159823	-0.0531993
139	20.8207	15.8303	36.3	42.3587	85.4062	14.2824				-0.151109	-0.195307	0.0307339	-0.0964409	-0.0255365	0.142354				53.3531	78.4691	37.7	24.9867	8.1661	24.3202					0.214088	0.216219	0.187143	-0.168097	-0.294531	0.0763764
140	20.7367	21.4335	38.2577	32.69	96.3709	14.0864				-0.154534	0.089517	0.0863225	-0.302685	0.099568	0.126678				51.5149	84.9816	38.9231	25.6678	11.1085	25.7939					0.172258	0.317159	0.225657	-0.145421	-0.0403375	0.1416
141	21.1877	15.805	37.1038	42.0395	84.0889	13.3588				-0.136146	-0.196593	0.0535577	-0.10325	-0.0405666	0.0684816				57.1111	79.5442	39.4423	28.3023	12.8407	27.943					0.299604	0.232883	0.242006	-0.0577083	0.109307	0.236716
142	23.521	17.555	30.6154	34.7112	90.2511	12.8073				-0.0410134	-0.107637	-0.13068	-0.259571	0.0297426	0.0243708				46.8922	85.7713	43.6346	22.8605	7.9864	29.0614					0.0670652	0.329399	0.374018	-0.238887	-0.310055	0.286215
143	22.1064	18.5069	44.0192	46.1337	92.5303	15.2558				-0.0986888	-0.0592492	0.24992	-0.0159159	0.0557477	0.22021				52.4367	92.197	33.0154	32.093	14.1695	28.8333					0.193234	0.428993	0.0396283	0.0684986	0.224102	0.27612
144	22.3445	14.6927	35.1962	49.7082	91.3216	15.4551				-0.0889811	-0.253134	-0.000608407	0.0603322	0.0419567	0.236151				57.6623	92.6694	29.3538	28.5216	10.5525	22.8443					0.312146	0.436315	-0.0756726	-0.050407	-0.0883703	0.0110553
145	17.8291	18.9587	46.5923	42.5653	91.8054	8.0897				-0.273081	-0.0362831	0.322982	-0.0920339	0.0474768	-0.352959				51.4697	96.3906	39.9231	31.6213	8.7864	24.2259					0.171229	0.493991	0.257146	0.0527939	-0.240944	0.0722029
146	22.7311	18.5092	39	41.7568	86.8561	17.1429				-0.0732188	-0.0591323	0.1074	-0.10928	-0.00899353	0.371147				62.4576	91.1369	37.9115	19.6944	8.4508	15.9145					0.421267	0.412562	0.193802	-0.344298	-0.269936	-0.295648
147	22.4762	20.9335	46.2577	38.9027	96.1552	14.4884				-0.0836115	0.0641008	0.313481	-0.170161	0.0971069	0.158831				49.2255	97.1452	42.7654	24.1462	9.5085	27.2917					0.120161	0.505687	0.346648	-0.196081	-0.178561	0.207891
148	23.4986	13.8509	36.4423	39.9422	99.4076	13.4452				-0.0419267	-0.295925	0.0347744	-0.147988	0.134216	0.0753922				48.1672	91.2972	31.2231	24.6645		26.1711					0.0960787	0.415047	-0.0168098	-0.178825	-1	0.158295
149	22.0392	13.6697	34.7346		94.6671	12.4817				-0.101429	-0.305136	-0.0137155	-1	0.080128	-0.00167179				44.2057	99.0618	29.8231								0.005932	0.535393	-0.0608947	-1	-1	-1
150		11.2179	29.5808		96.1241	10.3488				-1	-0.429767	-0.160057	-1	0.096752	-0.172268				60.582	88.7279	39.3808								0.378586	0.375224	0.24007	-1	-1	-1

## Sheet: E
	6.25	12.5	25	50	100	200	400	800				6.25	12.5	25	50	100	200	400	800			Bonferroni's multiple comparisons test	95% confidence interval	P Value	F (DFn, DFd)			Bonferroni's multiple comparisons test	95% confidence interval	P Value	F (DFn, DFd)
/Gr5a fed	0/10	0/10	0/10	0/10	0/10	0/10	1/10	4/10			/Gr5a fed	0	0	0	0	0	0	0.1	0.4			ASTA-R1i/Gr5a fed vs. /Gr5a fed	0.08640 to 0.1511	<0.0001	F (14, 72) = 6.843			Row 1			F (14, 72) = 6.843
	0/10	0/10	0/10	0/10	0/10	2/10	2/10	5/10				0	0	0	0	0	0.2	0.2	0.5			ASTA-R1i/Gr5a fed vs. ASTA-R1i/ fed	0.03953 to 0.1042	<0.0001				ASTA-R1i/Gr5a fed vs. /Gr5a fed	-0.09149 to 0.09149	>0.9999
	0/10	0/10	0/10	0/10	0/10	1/10	3/10	7/10				0	0	0	0	0	0.1	0.3	0.7									ASTA-R1i/Gr5a fed vs. ASTA-R1i/ fed	-0.09149 to 0.09149	>0.9999
	0/10	0/10	0/10	0/10	0/10	0/10	2/10	4/10				0	0	0	0	0	0	0.2	0.4									Row 2
																												ASTA-R1i/Gr5a fed vs. /Gr5a fed	-0.09149 to 0.09149	>0.9999
											mean	0	0	0	0	0	0.075	0.2	0.5									ASTA-R1i/Gr5a fed vs. ASTA-R1i/ fed	-0.09149 to 0.09149	>0.9999
											SEM	0	0	0	0	0	0.0478714	0.0408248	0.0707107									Row 3
ASTA-R1i/Gr5a fed	0/10	0/10	0/10	0/10	1/10	2/10	4/10	8/10			ASTA-R1i/Gr5a fed	0	0	0	0	0.1	0.2	0.4	0.8									ASTA-R1i/Gr5a fed vs. /Gr5a fed	-0.09149 to 0.09149	>0.9999
	0/10	0/10	0/10	0/10	1/10	2/10	5/10	9/10				0	0	0	0	0.1	0.2	0.5	0.9									ASTA-R1i/Gr5a fed vs. ASTA-R1i/ fed	-0.09149 to 0.09149	>0.9999
	0/10	0/10	0/10	0/10	1/10	3/10	6/10	8/10				0	0	0	0	0.1	0.3	0.6	0.8									Row 4
	0/10	0/10	0/10	1/10	1/10	2/10	7/10	8/10				0	0	0	0.1	0.1	0.2	0.7	0.8									ASTA-R1i/Gr5a fed vs. /Gr5a fed	-0.06649 to 0.1165	>0.9999
																												ASTA-R1i/Gr5a fed vs. ASTA-R1i/ fed	-0.06649 to 0.1165	>0.9999
											mean	0	0	0	0.025	0.1	0.225	0.55	0.825									Row 5
											SEM	0	0	0	0.025	0	0.025	0.0645497	0.025									ASTA-R1i/Gr5a fed vs. /Gr5a fed	0.008510 to 0.1915	0.0292
ASTA-R1i/ fed	0/10	0/10	0/10	0/10	0/10	1/10	3/10	6/10			ASTA-R1i/ fed	0	0	0	0	0	0.1	0.3	0.6									ASTA-R1i/Gr5a fed vs. ASTA-R1i/ fed	-0.04149 to 0.1415	0.4299
	0/10	0/10	0/10	0/10	1/10	2/10	4/10	6/10				0	0	0	0	0.1	0.2	0.4	0.6									Row 6
	0/10	0/10	0/10	0/10	0/10	1/10	3/10	5/10				0	0	0	0	0	0.1	0.3	0.5									ASTA-R1i/Gr5a fed vs. /Gr5a fed	0.05851 to 0.2415	0.0007
	0/10	0/10	0/10	0/10	1/10	2/10	4/10	7/10				0	0	0	0	0.1	0.2	0.4	0.7									ASTA-R1i/Gr5a fed vs. ASTA-R1i/ fed	-0.01649 to 0.1665	0.1292
																												Row 7
											mean	0	0	0	0	0.05	0.15	0.35	0.6									ASTA-R1i/Gr5a fed vs. /Gr5a fed	0.2585 to 0.4415	<0.0001
											SEM	0	0	0	0	0.0288675	0.0288675	0.0288675	0.0408248									ASTA-R1i/Gr5a fed vs. ASTA-R1i/ fed	0.1085 to 0.2915	<0.0001
																												Row 8
																												ASTA-R1i/Gr5a fed vs. /Gr5a fed	0.2335 to 0.4165	<0.0001
																												ASTA-R1i/Gr5a fed vs. ASTA-R1i/ fed	0.1335 to 0.3165	<0.0001
	6.25	12.5	25	50	100	200	400	800				6.25	12.5	25	50	100	200	400	800			Bonferroni's multiple comparisons test	95% confidence interval	P Value	F (DFn, DFd)			Bonferroni's multiple comparisons test	95% confidence interval	P Value	F (DFn, DFd)
/Gr5a ST	0/10	0/10	0/10	1/10	2/10	5/10	9/10	10/10			/Gr5a ST	0	0	0	0.1	0.2	0.5	0.9	1			ASTA-R1i/Gr5a ST vs. /Gr5a ST	0.05870 to 0.1413	<0.0001	F (14, 72) = 2.754			Row 1			F (14, 72) = 2.754
	0/10	0/10	0/10	1/10	2/10	2/10	6/10	10/10				0	0	0	0.1	0.2	0.2	0.6	1			ASTA-R1i/Gr5a ST vs. ASTA-R1i/ ST	0.06495 to 0.1476	<0.0001				ASTA-R1i/Gr5a ST vs. /Gr5a ST	-0.1168 to 0.1168	>0.9999
	0/10	0/10	0/10	0/10	0/10	2/10	6/10	10/10				0	0	0	0	0	0.2	0.6	1									ASTA-R1i/Gr5a ST vs. ASTA-R1i/ ST	-0.1168 to 0.1168	>0.9999
	0/10	0/10	0/10	0/10	2/10	3/10	7/10	10/10				0	0	0	0	0.2	0.3	0.7	1									Row 2
																												ASTA-R1i/Gr5a ST vs. /Gr5a ST	-0.1168 to 0.1168	>0.9999
											mean	0	0	0	0.05	0.15	0.3	0.7	1									ASTA-R1i/Gr5a ST vs. ASTA-R1i/ ST	-0.1168 to 0.1168	>0.9999
											SEM	0	0	0	0.0288675	0.05	0.0707107	0.0707107	0									Row 3
ASTA-R1i/Gr5a ST	0/10	0/10	0/10	2/10	5/10	6/10	10/10	10/10			ASTA-R1i/Gr5a ST	0	0	0	0.2	0.5	0.6	1	1									ASTA-R1i/Gr5a ST vs. /Gr5a ST	-0.04182 to 0.1918	0.292
	0/10	0/10	1/10	2/10	3/10	6/10	9/10	10/10				0	0	0.1	0.2	0.3	0.6	0.9	1									ASTA-R1i/Gr5a ST vs. ASTA-R1i/ ST	-0.04182 to 0.1918	0.292
	0/10	0/10	1/10	1/10	3/10	6/10	9/10	10/10				0	0	0.1	0.1	0.3	0.6	0.9	1									Row 4
	0/10	0/10	1/10	1/10	1/10	5/10	8/10	10/10				0	0	0.1	0.1	0.1	0.5	0.8	1									ASTA-R1i/Gr5a ST vs. /Gr5a ST	-0.01682 to 0.2168	0.1078
																												ASTA-R1i/Gr5a ST vs. ASTA-R1i/ ST	0.008178 to 0.2418	0.0335
											mean	0	0	0.075	0.15	0.3	0.575	0.9	1									Row 5
											SEM	0	0	0.025	0.0288675	0.0816497	0.025	0.0408248	0									ASTA-R1i/Gr5a ST vs. /Gr5a ST	0.03318 to 0.2668	0.0088
ASTA-R1i/ ST	0/10	0/10	0/10	0/10	2/10	2/10	7/10	10/10			ASTA-R1i/ ST	0	0	0	0	0.2	0.2	0.7	1									ASTA-R1i/Gr5a ST vs. ASTA-R1i/ ST	0.05818 to 0.2918	0.002
	0/10	0/10	0/10	0/10	1/10	4/10	8/10	10/10				0	0	0	0	0.1	0.4	0.8	1									Row 6
	0/10	0/10	0/10	0/10	1/10	3/10	5/10	10/10				0	0	0	0	0.1	0.3	0.5	1									ASTA-R1i/Gr5a ST vs. /Gr5a ST	0.1582 to 0.3918	<0.0001
	0/10	0/10	0/10	1/10	1/10	4/10	7/10	10/10				0	0	0	0.1	0.1	0.4	0.7	1									ASTA-R1i/Gr5a ST vs. ASTA-R1i/ ST	0.1332 to 0.3668	<0.0001
																												Row 7
											mean	0	0	0	0.025	0.125	0.325	0.675	1									ASTA-R1i/Gr5a ST vs. /Gr5a ST	0.08318 to 0.3168	0.0004
											SEM	0	0	0	0.025	0.025	0.0478714	0.0629153	0									ASTA-R1i/Gr5a ST vs. ASTA-R1i/ ST	0.1082 to 0.3418	<0.0001
																												Row 8
																												ASTA-R1i/Gr5a ST vs. /Gr5a ST	-0.1168 to 0.1168	>0.9999
																												ASTA-R1i/Gr5a ST vs. ASTA-R1i/ ST	-0.1168 to 0.1168	>0.9999

## Sheet: F
	6.25	12.5	25	50	100	200	400	800					6.25	12.5	25	50	100	200	400	800			Bonferroni's multiple comparisons test	95% confidence interval	P Value	F (DFn, DFd)			Bonferroni's multiple comparisons test	95% confidence interval	P Value	F (DFn, DFd)
/Gr5a fed	0/10	0/10	0/10	0/10	0/10	0/10	1/10	4/10				/Gr5a fed	0	0	0	0	0	0	0.1	0.4			ASTA-R2i/Gr5a fed vs. /Gr5a fed	-0.02778 to 0.03403	>0.9999	F (14, 72) = 1.128			Row 1			F (14, 72) = 1.128
	0/10	0/10	0/10	0/10	0/10	2/10	2/10	5/10					0	0	0	0	0	0.2	0.2	0.5			ASTA-R2i/Gr5a fed vs. ASTA-R2i/ fed	-0.05903 to 0.002783	0.0816				ASTA-R2i/Gr5a fed vs. /Gr5a fed	-0.08742 to 0.08742	>0.9999
	0/10	0/10	0/10	0/10	0/10	1/10	3/10	7/10					0	0	0	0	0	0.1	0.3	0.7									ASTA-R2i/Gr5a fed vs. ASTA-R2i/ fed	-0.08742 to 0.08742	>0.9999
	0/10	0/10	0/10	0/10	0/10	0/10	2/10	4/10					0	0	0	0	0	0	0.2	0.4									Row 2
																													ASTA-R2i/Gr5a fed vs. /Gr5a fed	-0.08742 to 0.08742	>0.9999
												mean	0	0	0	0	0	0.075	0.2	0.5									ASTA-R2i/Gr5a fed vs. ASTA-R2i/ fed	-0.08742 to 0.08742	>0.9999
												SEM	0	0	0	0	0	0.0478714	0.0408248	0.0707107									Row 3
ASTA-R2i/Gr5a fed	0/10	0/10	0/10	0/10	0/10	1/10	3/10	4/10				ASTA-R2i/Gr5a fed	0	0	0	0	0	0.1	0.3	0.4									ASTA-R2i/Gr5a fed vs. /Gr5a fed	-0.08742 to 0.08742	>0.9999
	0/10	0/10	0/10	0/10	0/10	0/10	2/10	6/10					0	0	0	0	0	0	0.2	0.6									ASTA-R2i/Gr5a fed vs. ASTA-R2i/ fed	-0.08742 to 0.08742	>0.9999
	0/10	0/10	0/10	0/10	0/10	1/10	3/10	5/10					0	0	0	0	0	0.1	0.3	0.5									Row 4
	0/10	0/10	0/10	0/10	0/10	0/10	2/10	5/10					0	0	0	0	0	0	0.2	0.5									ASTA-R2i/Gr5a fed vs. /Gr5a fed	-0.08742 to 0.08742	>0.9999
																													ASTA-R2i/Gr5a fed vs. ASTA-R2i/ fed	-0.08742 to 0.08742	>0.9999
												mean	0	0	0	0	0	0.05	0.25	0.5									Row 5
												SEM	0	0	0	0	0	0.0288675	0.0288675	0.0408248									ASTA-R2i/Gr5a fed vs. /Gr5a fed	-0.08742 to 0.08742	>0.9999
ASTA-R2i/ fed	0/10	0/10	0/10	0/10	0/10	0/10	2/10	6/10				ASTA-R2i/ fed	0	0	0	0	0	0	0.2	0.6									ASTA-R2i/Gr5a fed vs. ASTA-R2i/ fed	-0.08742 to 0.08742	>0.9999
	0/10	0/10	0/10	0/10	0/10	2/10	2/10	6/10					0	0	0	0	0	0.2	0.2	0.6									Row 6
	0/10	0/10	0/10	0/10	0/10	2/10	4/10	7/10					0	0	0	0	0	0.2	0.4	0.7									ASTA-R2i/Gr5a fed vs. /Gr5a fed	-0.1124 to 0.06242	>0.9999
	0/10	0/10	0/10	0/10	0/10	1/10	3/10	6/10					0	0	0	0	0	0.1	0.3	0.6									ASTA-R2i/Gr5a fed vs. ASTA-R2i/ fed	-0.1624 to 0.01242	0.1068
																													Row 7
												mean	0	0	0	0	0	0.125	0.275	0.625									ASTA-R2i/Gr5a fed vs. /Gr5a fed	-0.03742 to 0.1374	0.3892
												SEM	0	0	0	0	0	0.0478714	0.0478714	0.025									ASTA-R2i/Gr5a fed vs. ASTA-R2i/ fed	-0.1124 to 0.06242	>0.9999
																													Row 8
																													ASTA-R2i/Gr5a fed vs. /Gr5a fed	-0.08742 to 0.08742	>0.9999
																													ASTA-R2i/Gr5a fed vs. ASTA-R2i/ fed	-0.2124 to -0.03758	0.0033
	6.25	12.5	25	50	100	200	400	800					6.25	12.5	25	50	100	200	400	800			Bonferroni's multiple comparisons test	95.00% CI of diff.	Adjusted P Value	F (DFn, DFd)			Bonferroni's multiple comparisons test	95.00% CI of diff.	Adjusted P Value	F (DFn, DFd)
/Gr5a ST	0/10	0/10	0/10	1/10	2/10	5/10	9/10	10/10				/Gr5a ST	0	0	0	0.1	0.2	0.5	0.9	1			ASTA-R2i/Gr5a ST vs. /Gr5a ST	-0.02629 to 0.07004	0.604	F (14, 72) = 0.6954			Row 1			F (14, 72) = 0.6954
	0/10	0/10	0/10	1/10	2/10	2/10	6/10	10/10					0	0	0	0.1	0.2	0.2	0.6	1			ASTA-R2i/Gr5a ST vs. ASTA-R2i/ ST	-0.06067 to 0.03567	>0.9999				ASTA-R2i/Gr5a ST vs. /Gr5a ST	-0.1362 to 0.1362	>0.9999
	0/10	0/10	0/10	0/10	0/10	2/10	6/10	10/10					0	0	0	0	0	0.2	0.6	1									ASTA-R2i/Gr5a ST vs. ASTA-R2i/ ST	-0.1362 to 0.1362	>0.9999
	0/10	0/10	0/10	0/10	2/10	3/10	7/10	10/10					0	0	0	0	0.2	0.3	0.7	1									Row 2
																													ASTA-R2i/Gr5a ST vs. /Gr5a ST	-0.1362 to 0.1362	>0.9999
												mean	0	0	0	0.05	0.15	0.3	0.7	1									ASTA-R2i/Gr5a ST vs. ASTA-R2i/ ST	-0.1362 to 0.1362	>0.9999
												SEM	0	0	0	0.0288675	0.05	0.0707107	0.0707107	0									Row 3
ASTA-R2i/Gr5a ST	0/10	0/10	0/10	1/10	2/10	4/10	8/10	10/10				ASTA-R2i/Gr5a ST	0	0	0	0.1	0.2	0.4	0.8	1									ASTA-R2i/Gr5a ST vs. /Gr5a ST	-0.1362 to 0.1362	>0.9999
	0/10	0/10	0/10	0/10	2/10	5/10	9/10	10/10					0	0	0	0	0.2	0.5	0.9	1									ASTA-R2i/Gr5a ST vs. ASTA-R2i/ ST	-0.1362 to 0.1362	>0.9999
	0/10	0/10	0/10	1/10	2/10	4/10	7/10	10/10					0	0	0	0.1	0.2	0.4	0.7	1									Row 4
	0/10	0/10	0/10	0/10	1/10	3/10	6/10	10/10					0	0	0	0	0.1	0.3	0.6	1									ASTA-R2i/Gr5a ST vs. /Gr5a ST	-0.1362 to 0.1362	>0.9999
																													ASTA-R2i/Gr5a ST vs. ASTA-R2i/ ST	-0.1612 to 0.1112	>0.9999
												mean	0	0	0	0.05	0.175	0.4	0.75	1									Row 5
												SEM	0	0	0	0.0288675	0.025	0.0408248	0.0645497	0									ASTA-R2i/Gr5a ST vs. /Gr5a ST	-0.1112 to 0.1612	>0.9999
ASTA-R2i/ ST	0/10	0/10	0/10	0/10	1/10	7/10	8/10	10/10				ASTA-R2i/ ST	0	0	0	0	0.1	0.7	0.8	1									ASTA-R2i/Gr5a ST vs. ASTA-R2i/ ST	-0.1362 to 0.1362	>0.9999
	0/10	0/10	0/10	2/10	4/10	6/10	9/10	10/10					0	0	0	0.2	0.4	0.6	0.9	1									Row 6
	0/10	0/10	0/10	1/10	1/10	4/10	6/10	10/10					0	0	0	0.1	0.1	0.4	0.6	1									ASTA-R2i/Gr5a ST vs. /Gr5a ST	-0.03624 to 0.2362	0.1945
	0/10	0/10	0/10	0/10	1/10	3/10	6/10	10/10					0	0	0	0	0.1	0.3	0.6	1									ASTA-R2i/Gr5a ST vs. ASTA-R2i/ ST	-0.2362 to 0.03624	0.1945
																													Row 7
												mean	0	0	0	0.075	0.175	0.5	0.725	1									ASTA-R2i/Gr5a ST vs. /Gr5a ST	-0.08624 to 0.1862	0.8072
												SEM	0	0	0	0.0478714	0.075	0.0912871	0.075	0									ASTA-R2i/Gr5a ST vs. ASTA-R2i/ ST	-0.1112 to 0.1612	>0.9999
																													Row 8
																													ASTA-R2i/Gr5a ST vs. /Gr5a ST	-0.1362 to 0.1362	>0.9999
																													ASTA-R2i/Gr5a ST vs. ASTA-R2i/ ST	-0.1362 to 0.1362	>0.9999

## Sheet: G
	ASTA/chrimson;Gr5a/GC7s-1.tif	ASTA/chrimson;Gr5a/GC7s001-1.tif	ASTA/chrimson;Gr5a/GC7s002-1.tif	ASTA/chrimson;Gr5a/GC7s003-1.tif	ASTA/chrimson;Gr5a/GC7s004-1.tif	ASTA/chrimson;Gr5a/GC7s005-1.tif				ASTA/chrimson;Gr5a/GC7s-1.tif	ASTA/chrimson;Gr5a/GC7s001-1.tif	ASTA/chrimson;Gr5a/GC7s002-1.tif	ASTA/chrimson;Gr5a/GC7s003-1.tif	ASTA/chrimson;Gr5a/GC7s004-1.tif	ASTA/chrimson;Gr5a/GC7s005-1.tif						ASTA/ ;Gr5a/GC7s-1.tif	ASTA/ ;Gr5a/GC7s001-1.tif	ASTA/ ;Gr5a/GC7s002-1.tif	ASTA/ ;Gr5a/GC7s003-1.tif	ASTA/ ;Gr5a/GC7s004-1.tif	ASTA/ ;Gr5a/GC7s005-1.tif				ASTA/ ;Gr5a/GC7s-1.tif	ASTA/ ;Gr5a/GC7s001-1.tif	ASTA/ ;Gr5a/GC7s002-1.tif	ASTA/ ;Gr5a/GC7s003-1.tif	ASTA/ ;Gr5a/GC7s004-1.tif	ASTA/ ;Gr5a/GC7s005-1.tif					Peak
time（sec）	raw data	raw data	raw data	raw data	raw data	raw data				F/F0	F/F0	F/F0	F/F0	F/F0	F/F0	mean	SEM				raw data	raw data	raw data	raw data	raw data	raw data				F/F0	F/F0	F/F0	F/F0	F/F0	F/F0	mean	SEM			ASTA/ ;Gr5a/GC7s	ASTA/chrimson;Gr5a/GC7s
0	83.0092	349.73	56.5319	53.1286	16.8027	17.4387				0.236215	0.120869	0.0877422	-0.0801628	0.0274954	0.0999024	0.0820102	0.042784				49.3833	36.4177	30.7459	10.831	10.129	19.6687				-0.00118483	-0.080708	-0.202569	-0.0485683	-0.09794	-0.0354867	-0.0777427	0.0285751			0.906076	0.616431
2	63.5552	322.348	47.0468	62.7953	19.435	13.086				-0.0535037	0.0331105	-0.0947626	0.0872008	0.188462	-0.174633	-0.00235436	0.0537042				49.5133	37.1128	37.1436	12.336	11.8416	20.0464				0.00144452	-0.0631616	-0.0366367	0.083636	0.0545793	-0.016965	0.00381608	0.0227362			1.37661	-0.0256653
4	73.1626	277.609	56.4106	48.5525	11.8386	17.8688				0.0895746	-0.110274	0.0854083	-0.159391	-0.276062	0.12703	-0.040619	0.0671643				53.0817	41.7165	33.8177	13.9702	11.1584	16.8421				0.0736182	0.0530496	-0.122898	0.22719	-0.00626458	-0.174097	0.00843292	0.0591257			0.406859	0.281998
6	64.9785	272.451	41.0298	52.5725	9.0717	13.5247				-0.0323072	-0.126807	-0.210537	-0.0897907	-0.44526	-0.146963	-0.175278	0.0591702				64.3	37.0732	51.1657	12.827	10.6452	19.2229				0.300517	-0.0641612	0.327043	0.126767	-0.0519687	-0.0573478	0.0968082	0.0746576			1.42678	0.136161
8	76.3436	310.549	48.883	59.9203	18.0045	22.6065				0.136948	-0.0047026	-0.0594319	0.0374247	0.100986	0.425848	0.106179	0.0701454				55.1183	27.9909	28.663	8.7714	10.5044	24.3437				0.11481	-0.293426	-0.256591	-0.229491	-0.064508	0.193766	-0.0892399	0.0840057			2.12849	0.536446
10	75.1534	354.884	50.0766	61.7391	14.4126	14.1849				0.119223	0.137389	-0.0364656	0.0689144	-0.118661	-0.105323	0.0108461	0.0460565				50.5333	35.4543	41.3204	10.7316	13.2757	13.6904				0.0220748	-0.105027	0.0716936	-0.0572999	0.182296	-0.32865	-0.0358188	0.0715277			2.36237	0.448498
12	67.4724	304.803	45.7064	54.3768	14.8161	19.9161				0.00483326	-0.0231205	-0.120554	-0.0585522	-0.0939864	0.256158	-0.00587019	0.0556067				50.7917	25.4207	34.0829	11.2266	5.39	18.3251				0.0273011	-0.358305	-0.11602	-0.0138175	-0.519982	-0.101374	-0.180366	0.0872249		Mean	1.43453	0.332311
14	62.2914	305.545	51.2787	66.4058	17.6771	11.6731				-0.0723248	-0.0207409	-0.0133357	0.149711	0.0809654	-0.263748	-0.0232456	0.0580599				49.8617	31.2805	28.1215	13.3499	10.654	20.7833				0.00849118	-0.210386	-0.270636	0.1727	-0.051185	0.0191711	-0.0553074	0.0663419		SEM	0.298956	0.100838
16	65.0399	348.957	54.7298	56.2772	16.0673	12.8151				-0.0313928	0.118393	0.0530676	-0.0256498	-0.0174748	-0.19172	-0.0157961	0.0424426				43.3333	38.9482	48.0663	9.7217	9.5806	19.517				-0.123551	-0.0168306	0.246657	-0.146013	-0.146779	-0.0429257	-0.0382404	0.0611882
18	61.5153	304.403	43.3617	55.0996	22.9417	19.3656				-0.0838829	-0.0244	-0.165668	-0.046038	0.402899	0.221437	0.0507244	0.0881516				51.115	39.0732	38.7182	15.2525	10.7009	22.87				0.0338401	-0.0136752	0.00420244	0.339831	-0.0470082	0.121499	0.0731148	0.0582329
20	63.9571	291.828	51.9957	57.3188	9.9462	19.1269				-0.0475184	-0.0647026	0.00046025	-0.00761611	-0.391784	0.206381	-0.0507965	0.0789744				51.2583	40.6951	41.884	10.3101	14.5836	24.0712				0.0367385	0.0272664	0.0863112	-0.0943259	0.298774	0.180403	0.0891945	0.055533
22	65.4601	312.107	58.066	59.7428	22.5381	15.286				-0.0251349	0.000290722	0.11726	0.0343516	0.378219	-0.0358737	0.0781854	0.0640886				40.83	41.1829	44.0939	10.5129	9.6305	17.8947				-0.174182	0.0395799	0.143628	-0.0765113	-0.142335	-0.12248	-0.0553835	0.0500817
24	55.3896	355.863	55.2617	50.6576	14.3094	12.1441				-0.17511	0.140525	0.063302	-0.122944	-0.124971	-0.234041	-0.07554	0.0593545				49.44	38.4055	38.5304	11.9702	11.4927	23.4737				-3.80244e-05	-0.03053	-0.000668376	0.0515029	0.0235072	0.151103	0.0324794	0.0262299			P value	0.0058
26	68.9202	380.112	51.4234	55.779	14.5471	20.1785				0.0263946	0.218242	-0.0105515	-0.0342753	-0.110436	0.272708	0.060347	0.0617327				49.135	42.0305	36.0497	11.839	10.5543	21.0402				-0.00620688	0.0609759	-0.0650083	0.0399778	-0.060064	0.0317689	0.00024058	0.0217543			95% confidence interval	-1.805 to -0.3992
28	71.0123	309.738	53.7511	55.5471	18.3677	18.1054				0.0575513	-0.00730214	0.0342363	-0.0382903	0.123196	0.141953	0.0518907	0.0289688				51.1833	47.2805	44.8785	9.8529	11.3314	16.7306				0.0352216	0.193502	0.163977	-0.134488	0.00914231	-0.179565	0.0146316	0.0618336			F, DFn, Dfd	8.789, 5, 5
30	65.8742	297.343	54.9617	59.3098	17.1883	19.7634				-0.0189679	-0.047027	0.0575297	0.0268549	0.051075	0.246527	0.0526653	0.0421682				53.1833	29.6311	45.8564	12.0934	11.6804	24.7616				0.0756731	-0.252022	0.18934	0.0623252	0.0402233	0.214259	0.0549664	0.0679148
32	67.0798	291.674	50.5234	58.9167	16.8924	13.0108				-0.00101353	-0.0651978	-0.0278686	0.020049	0.0329806	-0.179376	-0.0367378	0.0319353				48.4833	39.939	47.3702	10.8091	11.0088	20.322				-0.019388	0.00818016	0.228602	-0.0504921	-0.0195875	-0.00345015	0.0239775	0.0417122
34	64.0368	268.386	55.4915	61.8569	15.5067	12.3075				-0.0463314	-0.139833	0.0677237	0.0709539	-0.0517558	-0.223735	-0.0538297	0.047142				45.6033	42.2988	37.6961	10.1769	11.4839	20.0495				-0.0776382	0.0677486	-0.0223069	-0.106027	0.0227235	-0.016813	-0.0220521	0.0259731
36	68.4325	307.618	57.3362	54.0181	16.5605	15.2215				0.0191316	-0.0140973	0.103218	-0.0647625	0.0126847	-0.0399419	0.00270541	0.0238923				61.5833	38.6098	33.4309	9.7296	7.8094	22.4087				0.24557	-0.0253728	-0.13293	-0.145319	-0.304517	0.0988774	-0.0439486	0.0797192
38	75.6534	318.202	55.3872	53.6812	16.4664	15.3269				0.126669	0.019823	0.0657168	-0.0705954	0.0069304	-0.0332941	0.0192083	0.028684				56.3867	39.4238	37.547	13.5726	11.1818	26.13				0.140464	-0.00482503	-0.026174	0.192263	-0.00418064	0.281362	0.096485	0.0518748
40	76.7822	361.219	53.8298	58.1341	16.8565	13.1269				0.14348	0.157691	0.0357506	0.00649951	0.0307853	-0.172054	0.0336921	0.0484811				52.7067	46.253	43.7348	13.334	8.8446	23.3653				0.0660335	0.167564	0.134314	0.171304	-0.212325	0.145787	0.0787796	0.0602555
42	67.908	323.554	56.5979	53.4312	16.7982	14.514				0.0113204	0.0369756	0.0890122	-0.0749237	0.0272202	-0.0845657	0.000839826	0.0276406				50.7133	42.1494	39.5414	11.4016	10.8504	18.0929				0.0257154	0.0639773	0.0255531	0.00155512	-0.0336942	-0.112761	-0.00494232	0.0252412
44	65.6442	287.734	59.6894	55.7736	16.722	14.1226				-0.0223932	-0.077825	0.148496	-0.0343688	0.0225605	-0.109252	-0.0121304	0.0371271				51.31	42.2317	37.4751	12.0974	14.2229	20.7059				0.0377842	0.0660548	-0.0280388	0.0626765	0.266651	0.0153755	0.0700839	0.0417828
46	54.5491	281.438	45.9638	63.0797	16.287	15.9355				-0.187627	-0.0980037	-0.115601	0.0921247	-0.00404002	0.00509184	-0.0513425	0.0411846				44.395	52.8262	41.768	11.8151	14.085	23.6625				-0.102077	0.333492	0.0833026	0.0378784	0.25437	0.160361	0.127888	0.0638484
48	64.4202	299.622	50.3234	62.3641	22.435	17.2344				-0.0406216	-0.0397232	-0.0317168	0.0797352	0.371914	0.0870167	0.0711007	0.0648464				41.955	47.3902	29.7182	9.6243	14.5601	18.9133				-0.151428	0.196271	-0.229223	-0.154569	0.296681	-0.07253	-0.019133	0.0873635
50	62.7362	271.983	54.6702	63.0688	14.9103	14.5183				-0.0657006	-0.128307	0.0519209	0.091936	-0.0882261	-0.0842945	-0.0371118	0.0358482				46.1233	52	43.3757	12.6024	10.1114	24.2167				-0.0671208	0.312636	0.125	0.107037	-0.0995074	0.187538	0.0942639	0.0635313
52	64.9202	313.464	49.1426	58.058	14.6278	14.114				-0.0331754	0.00463729	-0.0544369	0.00518196	-0.105501	-0.109795	-0.0488481	0.0208013				44.44	41.3689	32.326	8.1392	11.5249	17.7802				-0.101167	0.0442751	-0.161587	-0.285025	0.0263749	-0.128095	-0.100871	0.0501994
54	61.7945	329.682	51.7894	58.8804	11.2556	12.4172				-0.0797249	0.0566182	-0.00350921	0.0194205	-0.311713	-0.216816	-0.0892875	0.0595237				43.2983	38.3232	34.8785	8.171	9.3519	15.9907				-0.124259	-0.0326075	-0.0953847	-0.282232	-0.167146	-0.215848	-0.152913	0.0362817
56	66.5982	334.936	49.0809	60.5054	16.4978	20.4925				-0.00818577	0.0734545	-0.055624	0.0475548	0.00885053	0.292513	0.0597605	0.0500108				40.0817	24.253	37.4862	13.4453	13.6364	17.7276				-0.189317	-0.387782	-0.0277509	0.181081	0.214419	-0.130674	-0.0566706	0.0937297
58	70.7454	272.717	48.8128	61.7699	20.8117	16.2172				0.0535764	-0.125954	-0.0607826	0.0694476	0.272648	0.0228594	0.0386324	0.0557247				44.115	51.6677	37.1989	11.002	15.0381	19.1238				-0.10774	0.304248	-0.0352024	-0.0335471	0.33925	-0.0622075	0.0674668	0.0812792
60	71.0184	319.352	51.1128	59.7754	12.5157	16.9054				0.0576421	0.0235094	-0.0165278	0.034916	-0.234657	0.0662659	-0.0114753	0.0461998				53.25	48.1585	28.1271	12.328	8.4663	16.3684				0.0770222	0.215665	-0.27049	0.0829332	-0.246015	-0.197327	-0.0563687	0.0842385
62	61.908	264.339	44.6596	64.5598	14.722	16.3462				-0.0780346	-0.152804	-0.140695	0.11775	-0.0997407	0.0309957	-0.0537548	0.0434627				38.175	31.8963	28.8508	9.3181	5.8534	18.4427				-0.227881	-0.194842	-0.25172	-0.181467	-0.478713	-0.0956072	-0.238372	0.0527784
64	59.2393	275.708	44.5745	52.0399	15.8251	17.3398				-0.117778	-0.116367	-0.142333	-0.0990119	-0.0322855	0.0936646	-0.0690184	0.0359208				43.23	46.7957	23.9392	9.3996	9.9208	18.6285				-0.12564	0.181264	-0.379108	-0.174307	-0.116482	-0.086496	-0.116795	0.0734737
66	56.7117	247.476	52.3638	67.3243	20.3632	18.6086				-0.155421	-0.206849	0.00754294	0.165613	0.245222	0.173691	0.0383	0.0765784				39.6217	25.7134	28.9503	8.0577	9.1994	23.4613				-0.198621	-0.350917	-0.24914	-0.292184	-0.180728	0.150495	-0.186849	0.0720811
68	55.7883	291.3	42.9745	57.0091	11.3543	16.7656				-0.169172	-0.0663945	-0.173119	-0.0129781	-0.305678	0.0574483	-0.111649	0.0532642				46.9617	34.1951	23.547	9.4036	9.8944	21.5294				-0.0501635	-0.136813	-0.389281	-0.173956	-0.118833	0.0557583	-0.135548	0.0605599
70	65.1196	289.622	49.3936	59.2428	13.3722	10.9806				-0.0302058	-0.0717728	-0.0496073	0.0256949	-0.182282	-0.307426	-0.1026	0.0495856				51.5567	35.4207	29.1105	10.5348	8.6979	22.5263				0.0427739	-0.105875	-0.244985	-0.0745875	-0.22539	0.104644	-0.0839032	0.0571934
72	54.3681	252.721	50.483	53.9819	11.5022	17.4323				-0.190323	-0.19004	-0.0286459	-0.0653892	-0.296633	0.0994988	-0.111922	0.057783				46.4167	28.4085	21.3591	9.503	7.6158	16				-0.0611866	-0.282884	-0.446026	-0.165224	-0.321758	-0.215392	-0.248745	0.0543699
74	57.3436	283.957	46.4638	60.5888	17.2422	15.9742				-0.14601	-0.0899295	-0.10598	0.0489987	0.054371	0.00753275	-0.0385029	0.0351933				50.9283	38.628	22.9337	9.7714	12.9912	20.8916				0.030064	-0.0249134	-0.405187	-0.141647	0.156959	0.0244819	-0.0600404	0.0794505
76	65.2945	284.433	50.1085	62.8841	13.0493	16.5032				-0.0276011	-0.0884026	-0.0358518	0.0887382	-0.202027	0.0408981	-0.0373744	0.0415705				50.5483	23.8445	17.4807	9.7555	11.3988	16.5913				0.0223782	-0.398093	-0.546617	-0.143044	0.0151448	-0.186396	-0.206105	0.0927954
78	68.2883	217.961	47.6596	60.9565	14.5336	14.3011				0.0169841	-0.301443	-0.0829716	0.0553649	-0.111261	-0.0979939	-0.0868868	0.0509221				40.465	33.5793	22.4088	12.0656	10.3666	18.1981				-0.181564	-0.152358	-0.418801	0.0598831	-0.07678	-0.107602	-0.146204	0.0643892
80	61.862	211.434	57.617	54.0707	14.1928	13.9118				-0.0787197	-0.322365	0.108621	-0.0638518	-0.132102	-0.122548	-0.101827	0.0566413				46.22	29.625	20.326	9.0835	16.956	16.2167				-0.065165	-0.252176	-0.472821	-0.202075	0.510053	-0.204766	-0.114492	0.136096
82	81.0123	273.185	54.434	52.4783	17.7309	16.7376				0.206476	-0.124455	0.0473761	-0.0914217	0.0842553	0.0556823	0.0296522	0.0495473				47.235	30.0488	20.8232	8.7018	22.4604	22.774				-0.0446358	-0.241478	-0.459926	-0.235604	1.00026	0.116791	0.0225677	0.211223
84	108.54	304.009	66.6277	65.6232	24.1839	17.6581				0.616431	-0.0256653	0.281998	0.136161	0.47886	0.113741	0.266921	0.098906				93.09	81.3079	53.7017	24.0159	22.8827	68.5666				0.882817	1.05246	0.392817	1.10964	1.03787	2.36237	1.13966	0.266935
86	103.347	296.961	63.0596	57.0326	16.8117	22.9656				0.53909	-0.0482512	0.213343	-0.0125712	0.0280457	0.448498	0.194692	0.102164				94.24	79.686	54.2431	27.6262	18.9413	52.8638				0.906076	1.01151	0.406859	1.42678	0.686858	1.59233	1.00507	0.181812
88	83.9755	250.751	58.9745	62.0906	13.9641	21.8065				0.250606	-0.196353	0.134741	0.075	-0.146087	0.37539	0.0822162	0.0907084				84.6733	94.1494	52.6961	19.2306	29.2522	64.8452				0.712583	1.37661	0.366736	0.689281	1.60512	2.17988	1.15503	0.279051
90	73.2577	264.871	55.0234	55.7935	17.1121	15.3247				0.0909909	-0.151099	0.0587169	-0.0340243	0.0464154	-0.0334328	-0.00373883	0.036011				85.575	82.5366	49.9227	19.3082	35.129	57.3189				0.73082	1.08347	0.294804	0.696098	2.12849	1.8108	1.12408	0.289113
92	73.4417	248.116	57.1745	51.6268	25.1256	15.5505				0.0937311	-0.204799	0.100107	-0.106164	0.536446	-0.0191911	0.0666882	0.105432				66.5617	59.3354	34.9945	20.2406	29.7801	54.9721				0.346262	0.497803	-0.0923761	0.778003	1.65213	1.69572	0.812924	0.295605
94	67.5153	251.24	46.5979	64.942	20.2422	21.1527				0.00547215	-0.194785	-0.1034	0.124367	0.237823	0.334154	0.0672718	0.0827034				72.7183	54.6738	40.4199	15.2127	17.5425	53.2539				0.470783	0.380131	0.048338	0.336335	0.562285	1.61146	0.568223	0.220402
96	67.9417	217.515	56.0809	57.9946	18.7937	14.5161				0.0118223	-0.302874	0.0790644	0.00408429	0.149246	-0.0844333	-0.0238483	0.064325				63.6967	47.0427	31.2431	12.7932	16.6012	56.3003				0.288315	0.187499	-0.189673	0.123798	0.478456	1.76085	0.441541	0.278649
98	57.9202	231.305	47.7766	61.0525	19.0135	13.2968				-0.137423	-0.258678	-0.0807203	0.057027	0.162687	-0.161338	-0.0697408	0.0629501				55.7583	37.2683	33.6077	11.5944	18.8387	39.6997				0.127754	-0.0592363	-0.128344	0.0184913	0.677721	0.946793	0.263863	0.180243
100	60.1902	250.266	55.6872	52.3678	9.8296	18.0258				-0.103617	-0.197908	0.0714892	-0.0933348	-0.398914	0.136932	-0.0975587	0.0784225				53.1183	43.564	28.1989	10.0815	18.1584	23.0433				0.0743584	0.099686	-0.268628	-0.114407	0.617136	0.129997	0.0896903	0.122502
102	62.0644	227.382	48.4149	58.4293	11.9327	18.8258				-0.0757054	-0.27125	-0.0684387	0.0116104	-0.270308	0.18739	-0.081117	0.0713743				52.5933	44.3811	27.4917	13.3757	12.9677	26.257				0.0637399	0.120312	-0.28697	0.174967	0.154867	0.28759	0.0857509	0.0804312
104	60.638	273.923	48.1596	62.067	13.2915	14.5527				-0.0969481	-0.122089	-0.073351	0.0745914	-0.187217	-0.0821248	-0.0811897	0.035352				55.8183	41.1646	23.2818	10.2306	11.0909	28.9195				0.128968	0.039118	-0.396159	-0.101309	-0.0122759	0.418154	0.0127493	0.109453
106	53.9264	266.408	47.6468	56.0543	14.009	23.7355				-0.196901	-0.146175	-0.0832179	-0.0295089	-0.143341	0.497057	-0.0170143	0.105484				55.4117	40.5884	17.0331	8.8509	13.2669	28.7461				0.120744	0.024573	-0.558226	-0.222507	0.181512	0.409651	-0.00737551	0.138653
108	61.8558	214.639	46.5128	58.4801	10.9686	20.8516				-0.078812	-0.312089	-0.105037	0.01249	-0.329263	0.315163	-0.082925	0.0968302				59.99	41.122	26.0331	8.6143	13.3314	26.2724				0.213344	0.0380426	-0.324801	-0.243291	0.187257	0.288345	0.0264829	0.104187
110	67.4755	245.451	44.8787	56.9167	15.0717	19.8538				0.00487943	-0.213341	-0.136479	-0.0145778	-0.0783564	0.252229	-0.0309411	0.0654198				55.1633	34.6128	17.884	10.8012	10.2199	27.2508				0.11572	-0.126269	-0.536157	-0.051186	-0.0898447	0.336324	-0.0585688	0.118325
112	57.5736	230.442	51.2149	59.4764	18.8744	21.1312				-0.142585	-0.261443	-0.0145633	0.0297393	0.154181	0.332798	0.0163545	0.0861589				51.5467	36.1829	24.6188	8.4294	7.9355	31.0743				0.0425716	-0.0866351	-0.361482	-0.259533	-0.293287	0.523821	-0.0724241	0.133701
114	54.0184	253.708	50.2766	57.7591	11.7534	22.5398				-0.195531	-0.186876	-0.0326173	6.98308e-06	-0.281272	0.421642	-0.0457746	0.103044				47.2467	32.8963	18.4972	6.4115	9.9472	23.0495				-0.0443992	-0.169599	-0.520253	-0.436792	-0.114131	0.130301	-0.192479	0.0999836
116	58.0245	215.403	44.9809	62.8007	16.4933	16.5419				-0.13587	-0.309641	-0.134513	0.0872943	0.00857535	0.043339	-0.0734692	0.0604477				56.2867	27.5854	24.7293	7.507	5.5865	21.2229				0.138442	-0.303662	-0.358616	-0.34056	-0.502482	0.0407282	-0.221025	0.102794
118	58.319	218.781	47.6617	55.1359	14.3229	16.9892				-0.131484	-0.298816	-0.0829312	-0.0454096	-0.124146	0.0715513	-0.101872	0.0495924				57.2733	44.8567	21.7624	8.8628	9.3724	32.1238				0.158396	0.132318	-0.435566	-0.221462	-0.165321	0.575286	0.0072753	0.145983
120	59.3834	238.262	43.3191	59.5942	18.8161	22.6258				-0.115632	-0.236381	-0.166488	0.0317788	0.150616	0.427066	0.0151599	0.100277				45.32	52.6037	33.4309	12.5726	15.1613	28.2848				-0.0833682	0.327875	-0.13293	0.10442	0.350222	0.387029	0.158875	0.093813
122	61.4479	264.197	48.8809	66.3424	14.0673	20.271				-0.0848867	-0.153258	-0.0594723	0.148613	-0.139776	0.278543	-0.00170626	0.0715128				62.025	36.997	28.3094	8.7455	9.6833	31.4892				0.254503	-0.0660847	-0.265762	-0.231766	-0.137633	0.544167	0.0162374	0.129995
124	58.5215	240.489	52.5447	63.8605	16.5516	23.1247				-0.128468	-0.229242	0.0110237	0.105643	0.0121404	0.458533	0.0382716	0.0969449				61.1333	37.4817	28.4972	8.8608	10.7449	38.3003				0.236468	-0.0538495	-0.260891	-0.221637	-0.0430897	0.878169	0.0891949	0.173331
126	44.7975	188.009	42.8553	66.0109	12.9238	22.514				-0.332853	-0.39744	-0.175412	0.142874	-0.209702	0.420014	-0.0920865	0.127729				57.7617	40.7317	34.2707	10.503	7.9062	40.7585				0.168275	0.0281903	-0.111149	-0.0773809	-0.295896	0.998715	0.118459	0.186926
128	60.7761	187.15	48.9362	55.5163	18.0717	25.1269				-0.0948914	-0.400192	-0.0584082	-0.0388235	0.105095	0.584816	0.0162662	0.132356				52.2867	40.5488	27.4144	9.0517	10.7947	36.0464				0.0575387	0.0235733	-0.288975	-0.204868	-0.0386547	0.767643	0.0527095	0.153128
130	54.6074	234.948	48.6128	53.0779	21.3991	24.1613				-0.186759	-0.247	-0.0646308	-0.0810406	0.308568	0.523914	0.0421752	0.124587				60.8283	39.3201	25.7348	9.7634	15.9531	29.1981				0.230299	-0.00744273	-0.332537	-0.14235	0.420738	0.431816	0.100087	0.127452
132	56.8405	201.824	48.3915	59.1051	15.3543	21.8903				-0.153502	-0.353163	-0.0688889	0.0233108	-0.0610752	0.380676	-0.0387737	0.0988601				61.3667	47.1098	26.3149	8.9225	10.2522	35.0588				0.241189	0.189193	-0.317492	-0.216217	-0.0869682	0.719213	0.0881528	0.154889
134	48.7301	223.953	48.6979	53.5	16.148	13.7269				-0.274287	-0.282241	-0.0629934	-0.0737326	-0.01254	-0.13421	-0.140001	0.0464996				66.1183	38.8232	20.558	9.6103	14.0117	29.3498				0.337293	-0.019986	-0.466804	-0.155799	0.247842	0.439255	0.0636337	0.139812
136	51.0675	213.313	45.3574	64.1413	15.1973	17.914				-0.239477	-0.31634	-0.127269	0.110505	-0.0706758	0.129881	-0.0855626	0.0738844				65.4533	45.253	36.5359	11.8052	12.7449	29.8669				0.323843	0.142321	-0.0523981	0.0370087	0.135025	0.464612	0.175069	0.0773406
138	52.7638	249.708	44.3128	64.7409	17.1659	17.5247				-0.214215	-0.199696	-0.147368	0.120886	0.0497053	0.105327	-0.0475601	0.0637938				53.6733	40.9116	35.9116	11.8429	13.7009	33.7678				0.0855837	0.0327315	-0.0685901	0.0403204	0.220163	0.655905	0.161019	0.10612
140	55.5767	231.172	44.717	64.5072	15.3857	17.8946				-0.172324	-0.259104	-0.139591	0.11684	-0.0591551	0.128657	-0.0641128	0.0646418				67.1183	46.6189	30.8343	10.0835	11.173	33.7678				0.357519	0.176801	-0.200276	-0.114231	-0.00496434	0.655905	0.145126	0.131162
142	58.6472	221.773	48.8255	61.4656	12.8655	23.1505				-0.126596	-0.289228	-0.0605382	0.0641791	-0.213267	0.46016	-0.0275484	0.109566				57.1483	42.2622	29.3536	13.9165	11.1935	33.8669				0.155868	0.0668247	-0.23868	0.222472	-0.00313867	0.660764	0.144019	0.122119
144	56.2178	236.056	43.4319	59.1069	22.0404	23.0409				-0.162776	-0.243451	-0.164318	0.023342	0.347784	0.453247	0.0423047	0.119577				57.275	51.3476	31.7403	9.2843	9.8387	33.7245				0.158431	0.296167	-0.176778	-0.184436	-0.123793	0.653781	0.103896	0.136146
146	56.773	220.755	57.0383	61.1594	22.9238	20.5419				-0.154508	-0.292488	0.097486	0.0588778	0.401804	0.295629	0.0678002	0.107029				53.2267	47.7805	24.9724	10.6421	9.7009	39.808				0.0765509	0.206123	-0.352311	-0.0651619	-0.136065	0.952104	0.11354	0.184787
148	61.4049	235.116	52.8404	53.3551	19.3004	20.6688				-0.085527	-0.246463	0.0167133	-0.0762413	0.180231	0.303633	0.0153909	0.0811185				43.88	51.4482	29.4696	4.9742	11.2962	34.9783				-0.112493	0.298707	-0.235671	-0.563049	0.0060075	0.715265	0.0181276	0.181118
150	54.8804	237.438	51.8936	59.6938	14.7309	18.9699				-0.182693	-0.239022	-0.00150428	0.0335032	-0.0991965	0.196479	-0.0487389	0.0647621				47.5467	44.9177	34.884	6.7058	12.8152	36.9381				-0.0383315	0.133857	-0.0952421	-0.41094	0.141285	0.81137	0.0903332	0.165997
152	53.684	218.996	51.6106	66.6178	14.2332	21.428				-0.200511	-0.298128	-0.00694954	0.153381	-0.129631	0.351518	-0.0217201	0.0983526				62.4567	47.5976	21.7901	12.831	14.4956	39.1548				0.263235	0.201506	-0.434848	0.127118	0.290937	0.920072	0.228003	0.176485
154	46.5583	245.657	48.0617	63.5127	18.9596	18.2581				-0.30663	-0.212681	-0.0752347	0.0996214	0.159391	0.151584	-0.0306582	0.0811549				58.4583	44.3689	41.884	9.7555	10.5601	31.7585				0.182364	0.120004	0.0863112	-0.143044	-0.0595475	0.557373	0.12391	0.0996087
156	70.8159	224.627	52.9809	57.2754	13.9507	18.4946				0.0546264	-0.280081	0.0194167	-0.00836751	-0.146906	0.166501	-0.0324685	0.0645123				61.8217	38.0518	26.4475	4.5746	11.5865	33.6099				0.250391	-0.0394584	-0.314053	-0.598152	0.0318608	0.648162	-0.0035415	0.177174
158	59.4724	213.27	56.2596	56.9529	14.2018	19.4903				-0.114307	-0.316477	0.0825029	-0.0139511	-0.131551	0.229302	-0.0440803	0.0771259				57.5983	50.9238	25.9392	11.992	11.1818	27.4861				0.16497	0.285469	-0.327236	0.0534179	-0.00418064	0.347863	0.0867172	0.0990878
160	54.2147	218.472	56.0596	55.0326	13.9955	20.7441				-0.192607	-0.299806	0.0786546	-0.047198	-0.144167	0.308382	-0.0494568	0.0888075				49.2817	42.6341	30.4696	11.0855	14.1378	39.1115				-0.00323976	0.0762126	-0.209735	-0.0262122	0.259072	0.917949	0.169008	0.162159
162	53.5061	242.373	57.3894	59.8424	22.7982	19.4344				-0.20316	-0.223203	0.104242	0.036076	0.394124	0.225776	0.0556424	0.0984875				66.4467	47.4329	21.663	8.2982	7.0821	37.7523				0.343936	0.197349	-0.438144	-0.271058	-0.369288	0.851297	0.0523483	0.205533
164	50.638	194.712	48.383	53.8859	18.9148	19.7656				-0.245873	-0.375955	-0.0690525	-0.0670513	0.156652	0.246666	-0.0591024	0.0958271				47.5433	45.0701	35.8343	5.9284	10.4223	37.9969				-0.0384002	0.137705	-0.0705949	-0.479229	-0.0718196	0.863291	0.0568253	0.181304
166	51.4387	219.618	50.7234	48.7917	14.6726	15.4452				-0.233949	-0.296134	-0.0240203	-0.155249	-0.102762	-0.0258326	-0.139658	0.0452062				69.5917	46.9207	28.2597	12.1213	12.0264	34.1115				0.407546	0.184419	-0.267051	0.064776	0.071037	0.672759	0.188914	0.131547
168	57.6442	229.953	49.5383	55.3152	17.5022	17.0624				-0.141533	-0.263011	-0.0468231	-0.0423053	0.0702702	0.0761682	-0.0578724	0.0528623				50.7217	51.3384	30.3867	7.4811	11.915	24.0836				0.0258853	0.295935	-0.211885	-0.342835	0.0611161	0.181011	0.001538	0.0978374
170	48.3374	224.725	56.3404	62.4873	18.4664	10.4645				-0.280135	-0.279765	0.0840575	0.0818682	0.129232	-0.339978	-0.100787	0.0897868				46.96	38.5366	32.7735	7.0795	10.5455	28.1053				-0.0501979	-0.0272206	-0.14998	-0.378113	-0.0608477	0.378227	-0.048022	0.100274
172	50.8681	202.279	49.8809	65.9293	15.0673	13.5376				-0.242446	-0.351704	-0.0402311	0.141461	-0.0786254	-0.14615	-0.119616	0.0697136				67.46	42.8933	28.8232	8.9304	12.5689	19.5913				0.36443	0.0827556	-0.252436	-0.215523	0.119351	-0.0392822	0.00988244	0.0939918
174	60.6288	218.833	42.4532	62.9964	17.7982	9.7613				-0.0970851	-0.298651	-0.183149	0.0906825	0.0883708	-0.38433	-0.130694	0.0802951				74.0333	52.5	28.6243	9.4314	8.4751	29.0155				0.49738	0.325257	-0.257595	-0.171514	-0.245232	0.422862	0.0951932	0.145319
																					57.2267	44.3841	31.1602	7.992	11.7009	33.0805				0.157454	0.120388	-0.191823	-0.297956	0.0420489	0.622201	0.0753855	0.131613
																					55.3733	34.3659	36.1105	8.2286	16.1144	25.5635				0.119968	-0.132502	-0.0634314	-0.277172	0.435103	0.253582	0.0559246	0.107649
																					59.495	42.3659	31.6464	8.6461	12.7918	23.4799				0.203332	0.0694424	-0.179213	-0.240497	0.139201	0.151407	0.0239454	0.0763726
																					45.7633	44.253	24.9503	9.2346	13.2522	26.2105				-0.0744021	0.117078	-0.352884	-0.188801	0.180203	0.28531	-0.0055827	0.0988441
																					54.7233	35.9146	38.5138	8.7137	10.9619	23.0186				0.106821	-0.0934078	-0.00109892	-0.234559	-0.0237643	0.128786	-0.0195373	0.0547769
																					61.0517	42.7287	20.4254	9.3757	11.3284	28.4458				0.234818	0.0786006	-0.470243	-0.176407	0.00887514	0.394925	0.0117613	0.125004
																					53.5967	48.9207	26.4862	11.7256	7.8328	25.7771				0.0840344	0.234905	-0.313049	0.0300164	-0.302433	0.264057	-0.000411517	0.103655
																					55.605	50.6494	35.8564	9.0755	13.7625	20.2074				0.124654	0.278543	-0.0700217	-0.202777	0.225649	-0.0090699	0.0578295	0.0752951
																					51.3983	37.5762	37.7624	9.8628	13.6452	25.7988				0.0395701	-0.051464	-0.0205874	-0.133618	0.215203	0.265121	0.0523707	0.0639368
																					53.0567	45.2683	29.0442	10.7137	11.7009	21.4675				0.0731125	0.142708	-0.246704	-0.0588723	0.0420489	0.0527229	0.000835903	0.0561496
																					57.21	40.997	24.3094	10.5666	10.5543	22.3406				0.157116	0.0348873	-0.369507	-0.0717941	-0.060064	0.0955379	-0.0356373	0.0758743

## Sheet: H
	hugin/chrimson;Gr5a/GC7s	hugin/chrimson;Gr5a/GC7s_0002.oir	hugin/chrimson;Gr5a/GC7s_0003.oir	hugin/chrimson;Gr5a/GC7s_0004.oir	hugin/chrimson;Gr5a/GC7s_0005.oir	hugin/chrimson;Gr5a/GC7s_0006.oir	hugin/chrimson;Gr5a/GC7s0008.oir	hugin/chrimson;Gr5a/GC7s_0009.oir			hugin/chrimson;Gr5a/GC7s	hugin/chrimson;Gr5a/GC7s_0002.oir	hugin/chrimson;Gr5a/GC7s_0003.oir	hugin/chrimson;Gr5a/GC7s_0004.oir	hugin/chrimson;Gr5a/GC7s_0005.oir	hugin/chrimson;Gr5a/GC7s_0006.oir	hugin/chrimson;Gr5a/GC7s0008.oir	hugin/chrimson;Gr5a/GC7s_0009.oir						hugin;Gr5a/GC7s.oir	hugin;Gr5a/GC7s_0001.oir	hugin;Gr5a/GC7s_0003.oir	hugin;Gr5a/GC7s_0004.oir	hugin;Gr5a/GC7s_0005.oir	hugin;Gr5a/GC7s_0006.oir	hugin;Gr5a/GC7s_0007.oir			hugin;Gr5a/GC7s.oir	hugin;Gr5a/GC7s_0001.oir	hugin;Gr5a/GC7s_0003.oir	hugin;Gr5a/GC7s_0004.oir	hugin;Gr5a/GC7s_0005.oir	hugin;Gr5a/GC7s_0006.oir	hugin;Gr5a/GC7s_0007.oir						Peak
time	Mean1	Mean1	Mean1	Mean1	Mean1	Mean1	Mean1	Mean1			F/F0	F/F0	F/F0	F/F0	F/F0	F/F0	F/F0	F/F0	mean	SEM				Mean1	Mean1	Mean1	Mean1	Mean1	Mean1	Mean1			F/F0	F/F0	F/F0	F/F0	F/F0	F/F0	F/F0	mean	SEM			Gr5a-GC7s;hugin	Gr5a-GC7s;Hugin-chrimson
0	32.6095	22.5903	6.5789	5.1665	6.8417	7.8903	10.8062	56.3827			0.270852	0.0360342	0.031028	0.140536	-0.1488	0.0171419	-0.178228	-0.0837774	0.0105983	0.0527279				56.0272	12.4335	147.329	46.0762	36.8062	18.4924	10.6182			-0.0539796	0.0338717	0.117227	-0.223771	0.0420332	0.16499	0.236306	0.0452395	0.0573999			1.25791	-0.267228
1	31.4113	12.7079	6.6192	4.3807	8.3422	8.8736	11.6873	56.2089			0.224156	-0.417192	0.0373437	-0.0329339	0.0378823	0.143899	-0.111223	-0.0866016	-0.0255836	0.0686021				50.7353	11.976	136.358	56.5244	34	15.4726	8.0538			-0.143333	-0.00417036	0.0340315	-0.0477544	-0.0374141	-0.0252526	-0.062274	-0.0408811	0.0208265			0.90435	0.949819
2	29.9347	26.2012	6.7699	3.8137	8.4071	7.9517	11.6524	59.8895			0.16661	0.201637	0.060961	-0.158103	0.0459567	0.025057	-0.113877	-0.0267916	0.0251813	0.0440134				52.6342	10.6601	141.342	54.4803	36.0317	14.253	9.9938			-0.11127	-0.11359	0.0718224	-0.0821906	0.0201061	-0.102085	0.163605	-0.0219432	0.0412367			0.350073	0.595806
3	29.8414	20.9071	8.1713	3.55	9.2443	6.842	12.2082	63.2488			0.162974	-0.0411606	0.280585	-0.216316	0.150116	-0.117995	-0.0716107	0.0277972	0.0217987	0.0586046				55.5624	10.9704	145.25	57.0087	32.6964	17.7302	8.4586			-0.0618277	-0.0877881	0.101458	-0.0395956	-0.0743208	0.116972	-0.0151421	-0.00860624	0.0317385			1.2972	0.44933
4	31.5765	20.4014	6.0258	4.7732	8.7072	7.0586	12.1882	61.8886			0.230594	-0.064353	-0.0556524	0.0537129	0.0832932	-0.0900729	-0.0731316	0.00569389	0.0112605	0.0384323				52.6551	12.2769	139.823	60.2285	33.4303	14.8298	4.4497			-0.110918	0.0208501	0.0603035	0.0146472	-0.0535431	-0.0657479	-0.481909	-0.0880453	0.0693079			3.13087	0.113687
5	26.0474	22.8421	8.5253	4.6913	8.15	9.2686	13.1952	63.8591			0.0151148	0.0475822	0.336063	0.035633	0.01397	0.194819	0.00344706	0.0377146	0.0855429	0.0417782				55.8539	10.4093	145.218	53.0868	32.8163	13.6603	8.8713			-0.0569057	-0.134445	0.101215	-0.105666	-0.0709263	-0.139424	0.0329097	-0.0533204	0.0339379			0.793631	0.782818
6	28.7961	21.386	5.6667	4.5941	8.7008	10.3197	12.1859	57.3073			0.122237	-0.0191973	-0.11193	0.0141755	0.0824969	0.330317	-0.0733065	-0.0687525	0.034505	0.0508026				53.1924	11.0291	138.033	53.2839	35.3559	16.3412	7.0088			-0.101845	-0.0829071	0.0467311	-0.102346	0.00097325	0.0294678	-0.183946	-0.0562675	0.0317909			1.18542	0.13557
7	27.0782	22.2879	5.709	5.0117	9.2242	7.8178	13.7816	57.5462			0.0552869	0.0221655	-0.1053	0.106363	0.147615	0.00779586	0.0480406	-0.0648704	0.027137	0.0294063				57.8165	10.2548	145.335	54.9212	35.7112	17.8526	7.8228			-0.0237672	-0.147292	0.102104	-0.074763	0.0110323	0.124683	-0.08917	-0.0138817	0.0379676				0.171991
8	28.3977	22.7781	6.3024	4.7219	7.6496	7.1849	14.0762	54.6589			0.10671	0.044647	-0.0123044	0.0423881	-0.0482865	-0.0737915	0.0704439	-0.111789	0.0022522	0.0269006				56.9354	10.352	136.374	54.6834	33.5528	17.4666	4.7831			-0.0386446	-0.139209	0.0341498	-0.0787691	-0.0500749	0.100366	-0.443091	-0.0878961	0.0660219		mean	1.27421	0.366474
9	26.9347	22.9628	6.5191	4.0558	8.0778	8.4275	12.8322	58.0459			0.0496945	0.0531177	0.0216563	-0.104658	0.00498732	0.0863925	-0.0241578	-0.0567502	0.00378535	0.0223172				57.6062	10.7239	139.392	50.6253	33.075	15.7652	8.2857			-0.0273181	-0.108285	0.0570382	-0.147134	-0.0636021	-0.00681925	-0.0352733	-0.047342	0.0253644
10	25.0646	22.5717	6.1889	3.9838	8.5901	7.8875	12.414	58.6745			-0.0231867	0.0351811	-0.0300918	-0.120552	0.0687244	0.0167809	-0.0559604	-0.0465355	-0.019455	0.0209111				53.3564	10.1701	151.095	56.0628	32.3326	14.7508	9.7037			-0.0990761	-0.154335	0.145787	-0.0555308	-0.0846205	-0.0707247	0.129828	-0.0269531	0.0441603
11	28.2469	22.4964	6.2848	4.7525	9.0997	6.6199	11.3318	57.4408			0.100833	0.0317277	-0.0150626	0.0491432	0.132125	-0.146626	-0.138258	-0.0665832	-0.00658747	0.036833				57.2226	11.2374	111.025	64.8243	32.2936	15.576	11.4056			-0.0337952	-0.0655865	-0.158073	0.0920709	-0.0857246	-0.0187385	0.327985	0.0083055	0.0604938
12	28.9225	22.7657	7.7399	4.9406	8.4739	5.6673	11.9075	60.0139			0.127163	0.0440783	0.212977	0.0906675	0.0542675	-0.269426	-0.0944779	-0.0247701	0.0175599	0.0524917				55.658	11.2266	149.221	62.1329	31.2999	13.9795	9.7399			-0.0602135	-0.0664845	0.131574	0.0467299	-0.113858	-0.119315	0.134043	-0.0067891	0.0415147			P value	0.0351
13	23.9526	22.5686	6.9928	4.5032	8.731	8.5818	12.454	59.3195			-0.0665234	0.035039	0.0958933	-0.00589124	0.0862542	0.106283	-0.0529185	-0.0360542	0.0202603	0.0247976				49.983	12.0398	140.922	60.6099	32.9852	15.9134	7.8466			-0.156036	0.00113475	0.0686382	0.0210725	-0.0661445	0.0025171	-0.0863989	-0.0307453	0.0287572			95% confidence interval	-1.687 to -0.07278
14	25.4228	19.6533	6.7358	5.0882	9.3724	7.2602	10.7263	58.9055			-0.00922703	-0.0986623	0.0556169	0.123251	0.166053	-0.0640846	-0.184304	-0.0427817	-0.0067673	0.0412345				50.3539	13.2266	150.314	62.7047	30.7788	15.9901	7.0362			-0.149773	0.0998197	0.139858	0.0563628	-0.128611	0.00734907	-0.180756	-0.0222501	0.0490226			F, DFn, Dfd	4.305, 6, 6
15	24.7566	21.7368	6.6161	4.7273	10.1482	6.6998	13.1269	59.6446			-0.0351901	-0.00310898	0.0368578	0.0435802	0.262573	-0.136326	-0.00174691	-0.0307713	0.0169835	0.0402398				52.7978	12.1313	136.135	63.0942	35.0966	15.9886	10.1808			-0.108508	0.00874317	0.0323397	0.0629245	-0.00636788	0.00725457	0.185378	0.0259663	0.0333075
16	23.733	20.322	5.8679	4.4077	6.5755	7.0242	13.4052	56.2527			-0.0750816	-0.0679944	-0.0803981	-0.0269734	-0.181919	-0.0945074	0.0194168	-0.0858899	-0.0741684	0.0203648				52.2842	11.2382	144.097	57.9793	32.6779	13.7743	8.6384			-0.11718	-0.06552	0.0927141	-0.0232443	-0.0748445	-0.132243	0.00579253	-0.0449321	0.0293385
17	26.4121	26.2921	6.3261	4.4302	8.2205	8.5019	12.9252	59.0247			0.0293278	0.205806	-0.0085902	-0.0220064	0.0227411	0.0959835	-0.0170855	-0.0408447	0.0331664	0.0288668				59.5947	11.035	114.529	58.8363	31.9736	15.3731	9.3051			0.00625776	-0.0824165	-0.131506	-0.00880672	-0.0947842	-0.0315209	0.0834182	-0.0370512	0.027399
18	26.5011	21.9608	6.806	4.7318	6.2223	9.2277	13.7356	62.6216			0.0327963	0.00716409	0.0666185	0.0445736	-0.225862	0.189547	0.0445425	0.0176052	0.0221231	0.0407238				60.0153	10.9139	128.958	59.8424	35.4287	14.7462	9.9603			0.0133596	-0.0924862	-0.0220894	0.00814268	0.00303432	-0.0710145	0.159705	-0.000192658	0.0308005
19	27.5449	23.4272	6.9845	4.874	8.3861	7.0158	14.5855	55.3546			0.0734751	0.074416	0.0945925	0.0759651	0.043344	-0.0955903	0.109174	-0.100484	0.0343616	0.0296531				57.4465	11.1558	145.373	59.0755	35.2809	16.7036	7.5661			-0.0300146	-0.0723717	0.102392	-0.004777	-0.0011501	0.0522984	-0.119058	-0.0103831	0.0279464
20	28.0718	23.8731	6.7059	4.8218	7.7264	7.7305	12.9921	61.3177			0.0940093	0.0948658	0.0509311	0.0644416	-0.0387316	-0.00345802	-0.011998	-0.00358328	0.0308096	0.0182537				59.0259	11.2621	139.608	61.8744	34.2909	17.1968	8.8915			-0.00334644	-0.0635326	0.0586761	0.042375	-0.0291783	0.0833691	0.0352617	0.0176606	0.0196081
21	24.5628	21.6821	7.2456	4.6247	8.6221	7.7119	14.927	63.4811			-0.0427428	-0.00561762	0.135511	0.0209306	0.0727056	-0.00585576	0.135144	0.0315721	0.042706	0.0233952				60.8241	12.574	120.124	55.5912	36.1267	16.9271	9.9277			0.0270162	0.0455546	-0.0890756	-0.0634757	0.0227956	0.0663785	0.155909	0.0235861	0.0309023
22	25.4659	22.8442	6.8153	4.7885	9.2351	7.6134	13.7616	61.7326			-0.00754735	0.0476785	0.0680759	0.0570905	0.148971	-0.0185534	0.0465197	0.00315888	0.0431742	0.0189088				60.6606	13.806	139.685	53.2191	33.7772	18.0532	8.0829			0.0242555	0.147998	0.0592585	-0.103438	-0.0437219	0.137321	-0.0588859	0.0232554	0.0368889
23	26.3345	23.8163	5.6388	4.486	6.8408	6.8875	15.0279	63.7941			0.0263036	0.0922608	-0.116302	-0.00968825	-0.148912	-0.11213	0.142817	0.0366584	-0.011124	0.0373981				59.8598	12.708	142.212	53.4228	33.7635	16.7584	7.8968			0.010734	0.056697	0.0784243	-0.100006	-0.0441097	0.0557507	-0.080554	-0.00329482	0.0271451
24	24.0704	20.5439	7.935	3.9361	9.634	6.7853	15.0242	63.6381			-0.0619325	-0.0578176	0.243552	-0.131082	0.1986	-0.125304	0.142536	0.0341234	0.0303344	0.0522599				56.4924	10.9222	115.671	43.7301	32.2566	20.9438	8.94			-0.0461246	-0.091796	-0.122847	-0.263295	-0.0867721	0.319424	0.0409086	-0.035786	0.0685287
25	25.906	24.0836	6.6202	4.9757	8.6231	6.7296	13.7203	63.7742			0.00960415	0.10452	0.0375004	0.098416	0.07283	-0.132484	0.043379	0.036335	0.0337625	0.0264061				57.0484	10.3087	143.897	56.5097	33.9937	16.3868	9.0952			-0.0367366	-0.14281	0.091202	-0.0480021	-0.0375925	0.0323405	0.058979	-0.0118028	0.0298124
26	26.6202	24.0609	6.2198	4.7957	7.9689	8.7082	14.1501	63.0169			0.0374378	0.103479	-0.0252493	0.0586799	-0.00856131	0.122578	0.0760637	0.0240288	0.048557	0.0183175				56.6198	10.2497	143.972	57.0581	34.0528	16.5813	10.6737			-0.0439735	-0.147716	0.09177	-0.0387634	-0.0359193	0.0445937	0.242768	0.0161085	0.0473278
27	23.7889	20.162	5.7193	4.4824	7.6167	6.2156	12.2997	64.6758			-0.0729031	-0.0753323	-0.103686	-0.010483	-0.0523797	-0.198744	-0.0646525	0.0509861	-0.0658994	0.0254008				60.2799	11.8601	130.702	52.2485	33.1035	14.6983	4.8836			0.0178274	-0.0138077	-0.00886206	-0.119789	-0.0627952	-0.0740321	-0.431389	-0.0989783	0.0581214
28	24.1486	22.257	6.3426	5.1278	8.0796	8.2444	14.1501	65.1586			-0.0588849	0.0207484	-0.00600437	0.131993	0.00521127	0.062789	0.0760637	0.0588316	0.0363435	0.0207045				61.5709	11.5702	124.988	48.7455	36.7138	17.8906	9.7011			0.0396259	-0.0379135	-0.0521917	-0.178803	0.0394172	0.127077	0.129526	0.00953404	0.0412729
29	25.8155	23.0609	6.0372	4.7012	8.3715	7.8123	14.2663	61.9913			0.0060772	0.0576168	-0.0538659	0.0378185	0.0415276	0.00708685	0.0849003	0.00736277	0.0235655	0.01481				56.5042	12.7304	141.986	54.9452	39.0855	14.4635	9.4206			-0.0459254	0.0585596	0.0767052	-0.0743586	0.106563	-0.0888241	0.0968662	0.0185123	0.0320642
30	24.6884	23.3375	5.9825	4.4041	7.3413	7.8541	15.0232	62.5834			-0.0378479	0.0703022	-0.0624383	-0.0277682	-0.0866432	0.0124753	0.14246	0.0169844	0.00344051	0.0264561				55.5055	12.327	106.677	59.3607	37.462	17.0152	9.0608			-0.0627885	0.025016	-0.191051	2.76565e-05	0.0605998	0.0719286	0.0549737	-0.00589914	0.0354204
31	24.9153	24.324	6.2157	4.523	8.3001	6.7249	15.5948	67.0377			-0.0290052	0.115545	-0.0258918	-0.00152027	0.0326444	-0.13309	0.185928	0.0893671	0.0292471	0.0351923				58.8938	11.5807	132.875	63.7134	34.925	17.0289	9.1728			-0.00557695	-0.0370404	0.00761394	0.073356	-0.0112261	0.0727917	0.0680142	0.0239903	0.017501
32	22.9928	22.5366	5.1115	4.8263	8.3532	8.9991	15.632	64.5028			-0.103929	0.0335714	-0.198939	0.065435	0.0392508	0.160078	0.188757	0.0481748	0.0290499	0.0451488				58.1631	12.767	138.781	56.0361	33.9699	15.1391	9.7522			-0.0179148	0.061603	0.0524026	-0.0559806	-0.0382663	-0.0462625	0.135475	0.0130081	0.0270666
33	24.3877	20.6223	6.5542	4.4122	8.5554	7.0362	14.0702	62.0798			-0.0495668	-0.0542221	0.027157	-0.02598	0.0644072	-0.0929605	0.0699876	0.0088009	-0.00654708	0.0208018				59.1049	12.472	129.728	51.0788	39.0253	17.5935	4.7302			-0.00201253	0.0370731	-0.0162489	-0.139494	0.104859	0.108361	-0.44925	-0.050959	0.0735958
34	22.6418	23.2559	6.5346	4.3294	6.8234	7.9861	13.2616	62.3303			-0.117608	0.0665598	0.0240854	-0.0442586	-0.151077	0.0294915	0.00849653	0.0128715	-0.0214298	0.0270775				60.633	11.9389	129.98	61.7054	43.4467	16.5266	10.0979			0.0237895	-0.0072553	-0.0143371	0.0395279	0.230035	0.0411477	0.175726	0.0698048	0.0357792
35	23.7746	22.0805	6.7317	4.3951	7.5371	9.8569	14.5005	69.1977			-0.0734604	0.0126538	0.0549744	-0.029755	-0.0622831	0.270657	0.10271	0.124467	0.0499956	0.0406737				60.2566	12.1292	159.25	58.2712	41.1631	15.0327	9.948			0.017434	0.00856855	0.207626	-0.0183267	0.165383	-0.0529655	0.158273	0.0694274	0.0394268
36	24.224	20.8328	7.2281	5.495	9.0677	7.8206	14.1645	68.2531			-0.0559465	-0.0445681	0.132769	0.213055	0.128144	0.00815681	0.0771588	0.109117	0.0709858	0.0333199				62.6682	11.6644	130.628	55.0601	37.6151	18.1391	9.6376			0.0581539	-0.0300806	-0.00942019	-0.072423	0.0649343	0.142732	0.122132	0.0394327	0.0301746
37	24.4824	24.1981	6.2301	4.0243	7.4666	8.0799	13.7375	68.479			-0.0458761	0.109771	-0.0236351	-0.111611	-0.0710542	0.0415833	0.044687	0.112788	0.0070816	0.0293576				59.0166	12.5552	133.572	60.0334	38.934	16.2538	9.3527			-0.00350347	0.0439913	0.0129063	0.0113604	0.102274	0.0239617	0.0889604	0.039993	0.0154266
38	24.7272	25.3024	5.5459	4.3339	8.8481	5.9842	16.4345	65.583			-0.0363358	0.160416	-0.130861	-0.0432652	0.100823	-0.228574	0.249784	0.0657281	0.0172144	0.0555497				59.0064	12.8663	122.987	62.68	37.2434	17.4939	8.9991			-0.0036757	0.06986	-0.0673649	0.0559467	0.0544109	0.102086	0.0477898	0.0370075	0.0210674
39	25.8191	25.7699	6.3818	3.7552	7.5087	7.8216	14.6213	70.8101			0.0062175	0.181857	0.000138956	-0.171017	-0.0658164	0.00828572	0.111897	0.150669	0.0277789	0.0413622				58.5042	12.3735	114.63	57.8176	35.3759	15.1603	10.515			-0.0121554	0.0288826	-0.130741	-0.0259684	0.00153948	-0.0449269	0.22429	0.00584574	0.0410683
40	24.5398	22.3498	5.3406	4.6373	7.8747	6.8913	13.7435	66.472			-0.0436392	0.0250044	-0.163035	0.0237121	-0.0202811	-0.11164	0.0451433	0.0801744	-0.0205701	0.0291633				60.0986	12.5565	145.595	52.9713	35.6389	16.7295	4.4153			0.0147661	0.0440994	0.104074	-0.107612	0.00898536	0.05393	-0.485915	-0.0525246	0.0762772
41	25.809	23.0681	6.6925	4.3258	8.871	8.4628	15.8262	64.0949			0.00582388	0.057947	0.048831	-0.0450534	0.103672	0.0909431	0.203525	0.0415464	0.0634044	0.025985				60.4864	12.7018	156.573	59.7963	37.9625	16.2766	9.4744			0.0213141	0.0561814	0.187327	0.00736605	0.0747696	0.0253981	0.10313	0.0679266	0.0235682
42	26.4889	23.3292	6.0619	4.3384	7.4245	8.3513	14.9052	56.7612			0.0323208	0.0699215	-0.0499949	-0.0422718	-0.076292	0.0765696	0.133486	-0.0776267	0.0082641	0.0284108				60.2821	12.8017	151.43	59.2919	35.0929	16.6558	7.9929			0.0178645	0.0644883	0.148325	-0.00113139	-0.00647264	0.049287	-0.0693648	0.0289994	0.0257623
43	26.85	21.4283	6.4665	5.1755	7.6542	7.868	12.6101	64.1621			0.0463936	-0.0172574	0.0134129	0.142523	-0.0477142	0.0142672	-0.0410477	0.0426384	0.019152	0.0215438				59.1559	12.7139	116.889	60.4669	33.613	16.0646	7.9515			-0.00115139	0.0571876	-0.113606	0.0186634	-0.0483706	0.0120424	-0.0741851	-0.0213456	0.0225331
44	24.7143	20.7203	6.9556	3.7579	7.3001	6.631	14.046	69.8058			-0.0368386	-0.0497276	0.0900634	-0.170421	-0.0917691	-0.145195	0.0681473	0.134349	-0.0251739	0.0396664				63.5998	12.9726	161.997	63.7174	34.2624	17.3761	6.6693			0.073884	0.078699	0.228454	0.0734234	-0.0299852	0.0946647	-0.223475	0.0422378	0.0526778
45	22.9605	28.387	5.4386	4.2286	7.9506	9.4498	12.711	72.091			-0.105187	0.301882	-0.147677	-0.0665109	-0.0108381	0.218178	-0.0333746	0.171484	0.0409944	0.0587404				61.7145	13.37	156.456	70.1884	36.4314	14.4514	8.4982			0.0420506	0.111744	0.186433	0.182438	0.0314221	-0.0895864	-0.0105313	0.0648528	0.0384146
46	23.7531	27.0929	5.4871	6.3267	8.7191	8.0251	13.7867	69.3047			-0.0742983	0.242532	-0.140076	0.396657	0.0847737	0.034519	0.0484285	0.126206	0.0898428	0.060264				67.7009	13.4098	159.742	70.0574	35.2967	14.8267	10.0864			0.143131	0.115053	0.211355	0.180231	-0.000702782	-0.0659432	0.174387	0.108216	0.0389331
47	23.2656	21.4283	7.1858	3.9307	5.8115	7.2565	16.4335	67.6251			-0.0932971	-0.0172574	0.12614	-0.132274	-0.276971	-0.0645616	0.249708	0.0989124	-0.0137001	0.0588471				66.4036	14.1028	160.453	67.827	33.3284	15.2401	8.7787			0.121226	0.172678	0.216749	0.142656	-0.056428	-0.0398997	0.022128	0.08273	0.040591
48	26.0151	23.1197	5.7864	4.694	7.8198	7.724	16.198	66.2648			0.013856	0.0603134	-0.0931706	0.036229	-0.0271114	-0.00429594	0.231799	0.0768074	0.0368034	0.0336396				61.3148	12.8017	166.578	68.5043	36.132	15.9932	5.4021			0.0353017	0.0644883	0.263193	0.154066	0.0229457	0.00754436	-0.371019	0.0252172	0.0743542
49	24.1996	22.2807	6.1662	4.5257	7.8362	8.0725	13.6612	72.8067			-0.0568974	0.0218353	-0.0336493	-0.000924232	-0.025071	0.0406293	0.0388847	0.183114	0.0209901	0.0262694				67.0497	13.4195	159.3	64.0621	30.5048	14.6771	8.3933			0.132136	0.11586	0.208005	0.0792304	-0.136368	-0.0753677	-0.0227451	0.0429643	0.0468786
50	26.5564	19.7214	5.6388	4.3537	7.538	7.5362	11.2477	71.5501			0.0349514	-0.0955391	-0.116302	-0.0388943	-0.0621711	-0.0285053	-0.144653	0.162694	-0.0360525	0.0346053				72.4244	11.3977	119.477	57.1343	37.4657	14.272	7.694			0.222888	-0.0522572	-0.0939857	-0.0374797	0.0607045	-0.100888	-0.104167	-0.0150265	0.045193
51	23.3812	17.7616	5.6336	4.6238	7.7786	7.8494	12.3592	72.7412			-0.0887919	-0.185419	-0.117117	0.0207319	-0.0322372	0.0118694	-0.0601277	0.182049	-0.0336303	0.0390284				68.5777	12.5867	106.366	68.1556	36.8437	17.2059	9.9691			0.157936	0.0466106	-0.193407	0.148192	0.0430949	0.0839424	0.16073	0.0638713	0.0469711
52	21.5104	16.1414	6.9432	5.0063	8.4886	8.0967	12.533	67.7343			-0.1617	-0.259725	0.0881201	0.105171	0.0560964	0.043749	-0.0469109	0.100687	-0.00931406	0.0480207				64.6682	13.0422	106.322	62.8263	37.2994	15.5418	8.9603			0.0919239	0.0844864	-0.193738	0.0584113	0.0559964	-0.0208931	0.0432722	0.0170656	0.0377776
53	24.0065	16.6729	6.4923	4.5581	7.4968	7.5074	11.677	63.2367			-0.0644228	-0.235349	0.0174562	0.00622826	-0.0672969	-0.0322179	-0.112007	0.0276006	-0.057501	0.0305621				63.4422	11.785	96.7006	66.6827	34.2175	14.3381	8.5573			0.0712229	-0.0200524	-0.266701	0.123379	-0.0312564	-0.0967241	-0.00365017	-0.0319689	0.047564
54	24.738	18.8762	5.9474	4.5725	7.3248	9.4461	11.8225	54.2774			-0.0359149	-0.134302	-0.0679391	0.00940715	-0.088696	0.217701	-0.100942	-0.117989	-0.0398343	0.0402466				63.5612	12.2933	93.0928	69.0481	36.8046	14.7698	9.0688			0.0732322	0.0222138	-0.294059	0.163228	0.0419879	-0.0695278	0.0559052	-0.00100288	0.055353
55	26.3833	18.6625	6.3942	3.757	9.4492	6.9387	9.8304	45.3823			0.0282054	-0.144102	0.00208225	-0.170619	0.175608	-0.105529	-0.252434	-0.262535	-0.0911655	0.0532529				66.2052	13.0431	94.9018	64.2946	38.8374	14.0509	10.4824			0.117876	0.0845613	-0.280341	0.0831472	0.0995392	-0.114817	0.220494	0.0300657	0.0639813
56	22.58	18.5139	5.5521	4.3771	5.3962	7.3197	10.3332	46.9978			-0.120016	-0.150917	-0.129889	-0.0337286	-0.32864	-0.0564144	-0.214198	-0.236283	-0.158761	0.0344461				60.7179	13.1795	90.871	68.8911	37.0417	13.6543	8.7134			0.025223	0.0959032	-0.310908	0.160583	0.0487005	-0.139802	0.014525	-0.0151108	0.0603192
57	23.5118	14.7833	5.2724	3.5428	7.7823	7.9721	8.7254	45.8171			-0.0837022	-0.32201	-0.173723	-0.217905	-0.0317769	0.0276867	-0.336465	-0.255469	-0.174171	0.0474201				64.133	12.8558	86.7037	66.1229	37.7814	14.383	9.8827			0.082887	0.0689869	-0.342509	0.113948	0.0696424	-0.0938955	0.15067	0.00710423	0.0650898
58	23.8916	20.1476	5.934	3.9235	7.2781	6.7342	9.118	42.8457			-0.0689007	-0.0759927	-0.0700391	-0.133864	-0.0945061	-0.131891	-0.306609	-0.303755	-0.148195	0.0354201				61.8862	12.4526	76.668	67.4696	38.9599	13.5053	8.1843			0.0449498	0.0354599	-0.418612	0.136635	0.103007	-0.149189	-0.0470796	-0.0421183	0.0723499
59	23.7961	16.2869	6.2394	4.7012	6.7841	8.5836	8.8397	42.596			-0.0726225	-0.253052	-0.0221776	0.0378185	-0.155966	0.106515	-0.327773	-0.307812	-0.124384	0.0575257				61.6538	11.9567	78.0397	64.853	35.8289	12.4521	7.6367			0.0410257	-0.00577519	-0.40821	0.0925544	0.0143645	-0.215539	-0.110838	-0.0846311	0.0664991
60	2.9576	15.9556	5.8999	4.3465	7.9936	7.8708	8.2161	39.2857			-0.884737	-0.268246	-0.0753831	-0.0404837	-0.00548829	0.0146281	-0.375195	-0.361605	-0.249564	0.106533				59.0506	11.0019	77.664	61.9833	33.2223	12.7857	9.119			-0.00292938	-0.0851688	-0.411059	0.0442096	-0.0594318	-0.194523	0.0617501	-0.0924503	0.0624006
61	21.1299	15.3695	7.1424	4.4932	9.3678	7.4061	9.1673	41.5639			-0.176529	-0.295125	0.119338	-0.0080988	0.165481	-0.0452766	-0.30286	-0.324584	-0.108457	0.0687878				62.7302	11.5358	76.9772	56.7709	34.1484	11.6892	10.3413			0.0592007	-0.0407739	-0.416267	-0.0436017	-0.0332127	-0.2636	0.204066	-0.0763127	0.0774308
62	2.6131	16.3416	6.7018	5.1251	13	8.0539	8.757	35.254			-0.898163	-0.250543	0.0502885	0.131397	0.617375	0.0382316	-0.334062	-0.42712	-0.134074	0.159357				61.9907	9.7861	65.7747	55.2465	36.9731	14.0775	9.0917			0.0467143	-0.186265	-0.501218	-0.0692827	0.0467584	-0.113141	0.0585715	-0.102552	0.0752292
63	17.0976	12.7657	5.3643	4.9613	7.0604	6.7333	8.3443	40.3814			-0.333675	-0.414541	-0.159321	0.0952371	-0.121591	-0.132007	-0.365446	-0.3438	-0.221893	0.0609015				63.1474	8.7753	64.8809	51.2899	29.8559	12.307	4.7954			0.0662452	-0.270315	-0.507996	-0.135938	-0.154739	-0.22468	-0.441658	-0.23844	0.0732752
64	14.9239	19.7967	6.6171	5.2547	8.8591	4.7463	8.7867	38.9614			-0.418388	-0.0920857	0.0370146	0.160007	0.102192	-0.388152	-0.331803	-0.366875	-0.162261	0.085112				64.3925	10.666	78.3373	56.4168	28.6399	13.1626	10.0397			0.0872687	-0.1131	-0.405953	-0.0495671	-0.189166	-0.170779	0.16895	-0.0960494	0.0718094
65	14.2032	20.6006	4.9247	4.7606	9.9652	4.9136	9.0098	39.0329			-0.446475	-0.0552173	-0.228214	0.0509314	0.239805	-0.366586	-0.314837	-0.365713	-0.185788	0.0851141				65.0892	9.1262	76.0826	65.3246	34.1858	11.2918	8.4974			0.0990325	-0.241137	-0.423051	0.100499	-0.0321539	-0.288636	-0.0106245	-0.113724	0.0772984
66	14.8248	17.3292	5.6398	4.0684	8.6102	6.6654	9.3959	40.0789			-0.42225	-0.20525	-0.116145	-0.101876	0.0712251	-0.140761	-0.285476	-0.348715	-0.193656	0.0554616				63.2642	11.0713	79.7747	60.6052	33.5523	12.7652	10.3748			0.0682173	-0.0793981	-0.395053	0.0209933	-0.0500891	-0.195814	0.207966	-0.0604539	0.0733525
67	13.8126	14.5872	6.969	3.9487	7.8362	7.1599	6.9229	44.9055			-0.461698	-0.331003	0.0921634	-0.1283	-0.025071	-0.0770143	-0.473539	-0.270283	-0.209343	0.0733069				67.0697	10.0495	78.4757	59.5351	35.7101	13.8685	10.5811			0.132473	-0.164363	-0.404903	0.00296571	0.0110011	-0.126308	0.231986	-0.0453069	0.079289
68	15.7107	18.2508	5.84	4.6049	7.9195	7.2035	7.7537	42.8899			-0.387725	-0.162984	-0.0847705	0.0165596	-0.0147073	-0.0713938	-0.410359	-0.303036	-0.177302	0.0595228				64.6032	9.8054	89.3409	56.2378	35.0459	14.6649	9.9991			0.0908264	-0.18466	-0.322511	-0.0525827	-0.00780327	-0.0761363	0.164223	-0.0555206	0.0617938
69	14.4774	16.709	5.7441	4.1827	8.8673	9.1617	9.2918	42.2029			-0.435789	-0.233693	-0.0997997	-0.0766436	0.103212	0.181039	-0.293392	-0.3142	-0.146159	0.0753194				60.9091	8.891	82.5029	58.159	30.774	13.5099	4.7928			0.0284514	-0.260695	-0.374364	-0.0202169	-0.128747	-0.148899	-0.441961	-0.192347	0.0662647
70	11.5154	17.7678	5.9587	4.991	6.2196	6.2677	8.3457	39.3446			-0.551224	-0.185135	-0.0661682	0.101794	-0.226198	-0.192028	-0.36534	-0.360648	-0.230618	0.0705798				61.2872	9.8219	88.8688	56.6393	31.9446	12.443	8.4162			0.0348357	-0.183288	-0.326091	-0.0458188	-0.0956053	-0.216112	-0.0200788	-0.121737	0.0477472
71	15.3941	15.7265	6.2085	4.775	8.0421	6.6227	7.7407	41.4352			-0.400064	-0.278753	-0.0270202	0.0541103	0.000545761	-0.146265	-0.411348	-0.326675	-0.191934	0.0660116				62.9796	9.0382	91.5538	51.6246	32.746	14.4103	10.3201			0.0634119	-0.248455	-0.30573	-0.1303	-0.0729165	-0.0921756	0.201597	-0.0835095	0.0657986
72	13.1917	15.0485	6.0279	5.5977	8.1784	6.0242	8.447	39.6784			-0.485895	-0.309847	-0.0553233	0.235726	0.0175033	-0.223418	-0.357636	-0.355223	-0.191764	0.084605				68.1151	8.6163	90.9456	55.7288	35.1827	14.8875	10.5397			0.150125	-0.283536	-0.310342	-0.0611576	-0.00393028	-0.0621129	0.227166	-0.0491126	0.0758407
73	13.7839	18.9907	5.2951	4.378	5.9387	6.8922	7.7017	41.8492			-0.462816	-0.12905	-0.170166	-0.0335299	-0.261146	-0.111524	-0.414314	-0.319948	-0.237812	0.0539768				63.5799	8.7118	92.2646	65.8644	35.3068	13.7454	5.0758			0.0735479	-0.275595	-0.30034	0.109593	-0.000416837	-0.134063	-0.409011	-0.133755	0.0761588
74	16.6123	21.3808	6.581	4.4797	8.2736	7.0019	8.7914	43.9107			-0.352588	-0.0194358	0.0313571	-0.011079	0.0293475	-0.0973822	-0.331446	-0.286448	-0.129709	0.0587762				67.2991	9.6846	74.4253	64.8043	33.2497	15.8989	9.9815			0.136347	-0.194705	-0.435618	0.091734	-0.0586561	0.00160362	0.162173	-0.042446	0.0804468
75	17.8772	17.3075	5.5851	3.9658	7.9012	8.3959	7.8016	42.0841			-0.303293	-0.206245	-0.124718	-0.124526	-0.0169841	0.082319	-0.406717	-0.316131	-0.177037	0.0578284				63.9384	7.9992	70.0776	62.5491	35.8384	11.7918	9.9436			0.0796012	-0.33485	-0.468588	0.0537414	0.0146335	-0.257137	0.157761	-0.107834	0.0913846
76	18.8026	17.4644	6.2559	4.09	7.1912	6.7537	9.9382	33.8643			-0.267228	-0.199049	-0.0195918	-0.0971077	-0.105318	-0.129378	-0.244236	-0.449703	-0.188951	0.0472339				68.6878	5.8848	78.3556	61.1784	32.9145	13.0312	10.3748			0.159795	-0.510666	-0.405814	0.0306498	-0.0681461	-0.179057	0.207966	-0.109325	0.103306
77	18.4989	23.1084	5.6533	4.3753	7.2406	6.2593	9.4721	39.9645			-0.279064	0.0597952	-0.11403	-0.0341259	-0.0991717	-0.193111	-0.279681	-0.350574	-0.161245	0.049257				68.4019	6.8073	82.4739	61.9345	33.595	14.8123	8.8889			0.154968	-0.433959	-0.374584	0.0433875	-0.0488802	-0.0668503	0.0349589	-0.0987085	0.083724
78	17.3575	22.2477	5.5635	4.1881	7.538	7.8494	9.2667	39.6376			-0.323547	0.0203219	-0.128103	-0.0754515	-0.0621711	0.0118694	-0.295301	-0.355886	-0.151034	0.0538804				65.2808	8.3568	85.1553	58.354	35.6199	18.1147	8.7125			0.102268	-0.305114	-0.354251	-0.0169318	0.00844745	0.141195	0.0144202	-0.0585666	0.0732801
79	14.7236	19.8989	6.7647	4.4554	7.312	8.9823	9.4112	39.4902			-0.426194	-0.0873986	0.060146	-0.0164434	-0.0902885	0.157912	-0.284312	-0.358282	-0.130608	0.0730691				67.5973	9.4723	81.5716	60.517	34.406	15.2082	9.381			0.141382	-0.212358	-0.381427	0.0195074	-0.0259197	-0.0419093	0.0922555	-0.0583528	0.0686703
80	14.1342	21.6914	5.3251	4.378	6.613	7.5669	10.7691	41.14			-0.449164	-0.00519111	-0.165464	-0.0335299	-0.177254	-0.0245478	-0.181049	-0.331472	-0.170959	0.0552812				68.2001	7.9857	81.0839	67.2325	33.6499	15.2971	9.5229			0.15156	-0.335972	-0.385125	0.132641	-0.0473259	-0.0363088	0.108777	-0.0588219	0.0835141
81	17.2577	31.3467	8.4603	6.0441	7.4511	13.8299	11.948	72.1222			-0.327436	0.437619	0.325876	0.334272	-0.0729826	0.782818	-0.091398	0.171991	0.195095	0.124515				76.8789	9.4131	81.6278	66.9927	36.0581	14.921	9.1261			0.298102	-0.217281	-0.381001	0.128601	0.0208535	-0.0600024	0.0625768	-0.0211644	0.0848796
82	16.8105	36.6244	9.3261	6.2295	7.6606	11.1255	12.6292	48.6051			-0.344864	0.679665	0.461562	0.3752	-0.046918	0.434193	-0.0395952	-0.210164	0.163635	0.130722				68.7566	12.4556	132.407	136.359	137.15	27.9574	9.5467			0.160957	0.0357094	0.00406804	1.2972	2.8829	0.761269	0.111548	0.750521	0.39851
83	15.7466	35.4861	9.7276	5.216	7.3513	11.881	12.0181	51.8093			-0.386326	0.62746	0.524484	0.151464	-0.0853991	0.531585	-0.0860671	-0.158095	0.139888	0.134078				105.142	20.1001	145.535	123.667	145.909	28.4711	10.224			0.77533	0.671366	0.10362	1.08338	3.13087	0.793631	0.190408	0.964086	0.384167
84	15.5162	42.515	10.0753	5.3501	8.1775	13.6338	11.3262	44.5397			-0.395305	0.949819	0.578975	0.181067	0.0173913	0.757539	-0.138684	-0.276227	0.209322	0.176554				133.723	19.1722	164.872	110.146	141.265	25.633	17.3333			1.25791	0.594209	0.250259	0.855582	2.9994	0.614835	1.01816	1.08434	0.341936
85	16.9892	34.192	10.1827	6.0954	7.1528	12.8085	12.4796	37.5475			-0.3379	0.56811	0.595806	0.345597	-0.110095	0.651149	-0.0509717	-0.389851	0.158981	0.152353				123.867	22.902	175.946	97.1029	133.948	23.4985	18.0529			1.09149	0.90435	0.334233	0.635856	2.79226	0.480365	1.10195	1.04864	0.311272
86	14.4573	31.355	7.4469	6.423	8.6459	10.8225	9.7811	37.6125			-0.436573	0.438	0.167059	0.417916	0.0756666	0.395133	-0.256183	-0.388794	0.0515281	0.129725				126.519	21.3488	178.035	83.6099	110.36	19.5053	16.4004			1.13628	0.775198	0.350073	0.408545	2.12443	0.228801	0.909543	0.847552	0.246206
87	14.0287	30.1042	8.7977	5.6058	6.4748	13.6413	13.473	34.9497			-0.453276	0.380636	0.378752	0.237514	-0.194448	0.758506	0.0245727	-0.432065	0.0875241	0.151737				115.001	16.1566	158.125	77.4843	85.6964	21.6558	16.7055			0.941799	0.343455	0.199096	0.305349	1.42618	0.364279	0.945067	0.646461	0.174047
88	13.1041	24.4985	6.8596	6.5653	7.5883	9.3234	11.6227	34.4075			-0.489309	0.123548	0.0750185	0.44933	-0.0559131	0.201883	-0.116136	-0.440876	-0.0315568	0.112281				109.522	13.3477	170.485	76.9639	70.4002	17.3655	18.7698			0.849283	0.109889	0.292821	0.296582	0.993125	0.0939969	1.18542	0.545874	0.170543
89	14.1644	25.4582	5.7399	4.2016	6.2708	9.6236	12.375	34.065			-0.447987	0.167562	-0.100458	-0.0724713	-0.219828	0.240582	-0.0589262	-0.446441	-0.117246	0.0889549				100.019	11.4341	127.801	70.3193	64.9488	18.1246	16.0229			0.688818	-0.0492305	-0.0308602	0.184643	0.838788	0.141819	0.86559	0.377081	0.153494
90	11.822	26.8431	5.7595	4.4662	6.979	8.7388	12.7951	39.5787			-0.539275	0.231076	-0.0973863	-0.0140592	-0.131718	0.126522	-0.0269791	-0.356843	-0.101083	0.0879911				100.215	9.0958	139.369	65.6473	58.1103	18.5296	16.3351			0.692132	-0.243665	0.0568622	0.105936	0.645181	0.167333	0.90194	0.332246	0.157202
91	11.8026	29.8318	6.0196	5.1638	8.0238	8.0428	12.4721	38.5639			-0.540031	0.368143	-0.0566241	0.13994	-0.00173101	0.0368007	-0.0515421	-0.373334	-0.0597973	0.100422				98.2681	9.8563	116.248	64.3347	49.9414	15.5342	15.052			0.659259	-0.180428	-0.118468	0.0838228	0.413908	-0.0213719	0.752546	0.227038	0.143553
92	10.8866	23.3715	6.063	5.1584	7.2827	9.2918	14.9326	38.1634			-0.575729	0.0718615	-0.0498225	0.138748	-0.0939338	0.19781	0.13557	-0.379842	-0.0694173	0.0973234				87.5624	11.9193	150.491	61.0401	42.3574	13.3921	15.8139			0.478493	-0.00888508	0.141205	0.0283199	0.199195	-0.156321	0.841256	0.217609	0.128186
93	13.799	26.8906	6.484	5.3096	8.9515	8.5762	13.7565	37.1201			-0.462228	0.233254	0.0161555	0.172126	0.113687	0.105562	0.0461319	-0.396796	-0.0215134	0.0923784				88.1517	11.1601	135.569	56.1931	36.8163	18.5805	15.5203			0.488443	-0.0720142	0.0280453	-0.0533357	0.0423191	0.17054	0.807071	0.201581	0.123942
94	12.0316	19.0206	7.13	4.7669	8.2946	8.0344	11.7105	37.7521			-0.531107	-0.127679	0.117395	0.0523221	0.0319602	0.0357179	-0.109459	-0.386526	-0.114672	0.0816546				80.7311	8.0907	131.62	50.0027	32.4884	15.228	15.7866			0.363146	-0.327241	-0.00190145	-0.157623	-0.0802095	-0.0406619	0.838077	0.084798	0.148319
95	13.1228	22.8411	4.7544	5.7201	6.925	7.9191	12.6083	36.8804			-0.488581	0.0475363	-0.254903	0.262747	-0.138437	0.0208545	-0.0411846	-0.400691	-0.124082	0.0879996				80.0242	10.1703	119.917	59.2799	33.7814	14.7774	14.0723			0.35121	-0.154318	-0.0906461	-0.00133355	-0.043603	-0.069049	0.638476	0.0901053	0.110504
96	11.9411	24.1775	6.0341	5.324	7.4986	8.2454	11.9382	36.8305			-0.534634	0.108826	-0.0543517	0.175305	-0.067073	0.062918	-0.0921432	-0.401502	-0.100332	0.0875237				74.8135	10.0659	116.034	58.7522	35.0449	13.4757	16.8245			0.263228	-0.162999	-0.120089	-0.0102235	-0.00783158	-0.151054	0.958923	0.109993	0.151823
97	14.2821	24.0743	5.4819	5.6616	6.8536	8.9201	11.8243	36.6953			-0.4434	0.104093	-0.140891	0.249833	-0.14732	0.149894	-0.100805	-0.403699	-0.0915369	0.0886385				74.2103	9.4532	105.045	57.3133	35.2534	14.5152	16.5141			0.253042	-0.213946	-0.203423	-0.0344641	-0.00192866	-0.0855671	0.922782	0.0909279	0.150661
98	13.0244	22.0423	5.936	3.6283	7.3532	9.2323	8.3978	38.4668			-0.492415	0.0109018	-0.0697257	-0.199031	-0.0851627	0.19014	-0.361378	-0.374912	-0.172698	0.080515				73.9316	9.5861	87.3092	62.9452	30.9224	14.0114	14.8933			0.248337	-0.202896	-0.337917	0.0604144	-0.124545	-0.117306	0.734068	0.037165	0.136201
99	13.4573	21.7637	6.2642	5.1035	8.183	8.8178	10.1817	39.3702			-0.475544	-0.00187529	-0.018291	0.126629	0.0180756	0.136706	-0.225719	-0.360232	-0.100031	0.0804226				75.3169	8.3259	86.3253	59.8216	32.6251	12.0699	14.8395			0.271727	-0.307684	-0.345378	0.00779227	-0.0763394	-0.239617	0.727804	0.0054721	0.144797
100	14.6899	23.5459	5.2663	5.5293	7.2196	8.4823	12.3815	38.7551			-0.427508	0.0798598	-0.174679	0.220627	-0.101784	0.0934568	-0.0584319	-0.370227	-0.0923359	0.0801448				76.2324	8.7271	76.369	62.173	29.0042	11.9719	11.836			0.287186	-0.274323	-0.420879	0.0474054	-0.178852	-0.245791	0.378098	-0.0581651	0.114309
101	12.6949	18.3571	4.4417	3.6265	8.9314	8.5585	9.875	36.9892			-0.505257	-0.158108	-0.303908	-0.199428	0.111187	0.10328	-0.249042	-0.398923	-0.200025	0.0775202				73.7438	7.8515	76.0219	69.519	30.6705	13.7166	11.2663			0.245166	-0.347131	-0.423511	0.171161	-0.131677	-0.135878	0.311766	-0.0443006	0.110035
102	13.1608	17.6553	5.5934	5.793	8.3678	7.9972	7.3146	37.99			-0.4871	-0.190294	-0.123417	0.27884	0.0410672	0.0309224	-0.443751	-0.38266	-0.159549	0.0953191				74.2702	7.5358	81.423	64.0909	32.2687	11.4369	9.2513			0.254054	-0.373382	-0.382554	0.0797156	-0.0864295	-0.279495	0.0771542	-0.101562	0.0946164
103	10.7545	18.8854	5.4293	5.2016	6.849	8.2835	7.1928	38.8114			-0.580877	-0.13388	-0.149134	0.148285	-0.147892	0.0678294	-0.453014	-0.369312	-0.202249	0.0886827				74.8169	7.2409	90.0678	62.8397	33.9868	12.6041	9.0723			0.263285	-0.397904	-0.316998	0.0586371	-0.0377878	-0.205963	0.0563127	-0.0829169	0.0887031
104	14.5879	21.4819	5.0568	4.4815	7.3568	8.4219	11.5516	39.5037			-0.431483	-0.0147992	-0.207512	-0.0106817	-0.0847148	0.0856706	-0.121543	-0.358062	-0.142891	0.063207				69.6971	6.8227	92.9433	66.7568	33.7365	13.0129	9.9277			0.176837	-0.432678	-0.295193	0.124627	-0.0448741	-0.180209	0.155909	-0.0707973	0.0906148
105	13.5822	22.582	5.8834	5.3753	8.0091	7.5362	10.7379	35.1972			-0.470677	0.0356535	-0.077969	0.18663	-0.00355988	-0.0285053	-0.183422	-0.428043	-0.121237	0.0806028				73.5238	7.1106	77.1905	65.6941	33.4087	12.7774	7.6949			0.241451	-0.408739	-0.414649	0.106724	-0.0541546	-0.195046	-0.104062	-0.118354	0.0928954
106	15.1393	20.6791	5.2178	4.7129	8.7475	6.3783	11.2783	34.834			-0.409994	-0.0516171	-0.18228	0.0404013	0.088307	-0.177771	-0.142326	-0.433945	-0.158653	0.0671109				69.9817	6.8972	90.9072	66.4095	33.8553	13.0448	9.6817			0.181642	-0.426483	-0.310633	0.118776	-0.0415108	-0.1782	0.127267	-0.0755916	0.0893307
107	13.8162	18.5428	5.7781	3.6175	7.8984	6.9201	9.8889	38.876			-0.461557	-0.149592	-0.0944713	-0.201415	-0.0173325	-0.107927	-0.247985	-0.368262	-0.206068	0.0524841				72.6682	5.0546	82.1513	64.4709	32.7951	11.946	9.3783			0.227004	-0.579699	-0.377031	0.0861173	-0.0715265	-0.247422	0.0919411	-0.124374	0.109507
108	15.4961	18.3344	5.5449	5.5365	7.4154	7.7212	9.7695	35.788			-0.396089	-0.15915	-0.131018	0.222216	-0.0774242	-0.00465689	-0.257065	-0.418443	-0.152704	0.0743311				69.3186	5.6284	88.1749	63.8597	35.0887	12.2447	4.4056			0.170446	-0.531987	-0.331353	0.0758206	-0.00659154	-0.228605	-0.487044	-0.19133	0.104752
109	11.6705	19.4799	5.5026	4.9928	7.9177	7.6087	10.0855	36.1521			-0.545179	-0.106615	-0.137647	0.102191	-0.0149313	-0.0191593	-0.233034	-0.412526	-0.170863	0.0767065				76.2969	6.6025	91.4587	63.4736	33.0971	13.8868	6.5141			0.288275	-0.450988	-0.306451	0.0693162	-0.0629764	-0.125155	-0.241546	-0.118504	0.0932076
110	14.379	25.8462	5.5088	4.2313	8.4721	7.5967	9.8783	34.5319			-0.439624	0.185356	-0.136675	-0.0659148	0.0540436	-0.0207062	-0.248791	-0.438854	-0.138896	0.0795247				71.9278	7.8108	90.3463	65.0661	33.482	12.864	6.9956			0.214502	-0.350516	-0.314886	0.0961444	-0.0520794	-0.18959	-0.185483	-0.111701	0.0791307
111	15.3927	23.5428	7.1641	4.5806	10.6231	9.6106	10.3555	39.4023			-0.400118	0.0797176	0.122739	0.0111953	0.321657	0.238906	-0.212502	-0.35971	-0.0247644	0.0956016				71.7243	6.7169	107.191	67.9185	32.9704	11.8951	6.3351			0.211066	-0.441476	-0.187154	0.144198	-0.0665635	-0.250629	-0.262387	-0.121849	0.0882948
112	14.8442	23.226	6.2312	4.9865	7.9515	7.0177	11.4977	39.3099			-0.421494	0.0651886	-0.0234627	0.1008	-0.0107261	-0.0953454	-0.125642	-0.361211	-0.108987	0.0672228				78.8059	6.2538	114.753	64.0094	32.7735	14.8647	6.388			0.330639	-0.479983	-0.129804	0.0783426	-0.072138	-0.0635492	-0.256228	-0.0846744	0.0960406
113	15.5743	25.676	6.612	4.1683	6.5297	6.6199	13.9605	39.2497			-0.393041	0.17755	0.0362153	-0.0798225	-0.187617	-0.146626	0.0616453	-0.36219	-0.111736	0.0714006				78.695	6.7626	109.454	67.9279	35.0903	14.1269	6.4965			0.328767	-0.437676	-0.169987	0.144356	-0.00654624	-0.110029	-0.243595	-0.0706728	0.0958554
114	17.168	34.1796	5.9701	5.0153	9.2818	7.5214	13.4373	48.0442			-0.330932	0.567542	-0.0643816	0.107158	0.154781	-0.0304132	0.0218579	-0.219279	0.0257917	0.0959323				76.6041	5.8496	102.372	62.2285	35.6901	15.7333	4.6861			0.293462	-0.513593	-0.223695	0.0483404	0.0104349	-0.0088289	-0.454385	-0.121181	0.109776
115	17.0603	33.6925	6.5903	3.7201	11.6185	8.2612	15.2491	52.9844			-0.335129	0.545202	0.0328145	-0.178765	0.445498	0.0649547	0.159639	-0.139	0.0744018	0.107388				77.325	6.1652	131.894	59.4696	34.4688	13.1611	6.075			0.305634	-0.487351	0.00017938	0.00186225	-0.0241417	-0.170873	-0.292671	-0.0953373	0.0954612
116	15.5197	13.1548	6.0815	4.1737	8.5956	8.3485	14.0929	56.0923			-0.395169	-0.396696	-0.0469233	-0.0786304	0.0694086	0.0762086	0.0717139	-0.0884964	-0.098573	0.0691501				77.8755	5.7505	137.679	56.7682	33.9842	15.326	4.8351			0.314929	-0.521834	0.0440482	-0.0436472	-0.0378614	-0.0344881	-0.437036	-0.10227	0.108644
117	15.7301	29.0784	6.4252	3.7264	9.6523	6.9052	14.9447	65.0941			-0.386969	0.333591	0.00694049	-0.177375	0.200876	-0.109848	0.13649	0.0577835	0.00768621	0.0808936				76.2948	6.1512	129.467	59.4623	33.9889	14.1087	5.664			0.288239	-0.488515	-0.018225	0.00173927	-0.0377284	-0.111176	-0.340525	-0.100884	0.0951892
118	14.6734	31.9185	5.5222	4.2313	8.8692	9.7407	15.5404	58.4651			-0.428151	0.463843	-0.134575	-0.0659148	0.103448	0.255678	0.181791	-0.0499382	0.0407726	0.0962914				79.0578	6.6989	146.125	61.984	38.585	14.2052	6.1411			0.334893	-0.442972	0.108097	0.0442214	0.0923934	-0.105097	-0.284975	-0.0362056	0.0992393
119	17.8306	35.6935	5.2466	4.5932	10.645	7.1691	14.27	61.775			-0.305109	0.636972	-0.177767	0.0139768	0.324382	-0.0758283	0.0851817	0.00384788	0.063207	0.104958				88.907	7.3213	139.768	63.3173	43.8247	15.6109	3.276			0.501197	-0.391218	0.0598879	0.066683	0.240736	-0.0165399	-0.618566	-0.0225458	0.142225
120	17.776	34.5944	6.936	4.9964	8.9835	7.4089	14.9967	69.8734			-0.307237	0.586565	0.0869917	0.102986	0.117669	-0.0449156	0.140445	0.135447	0.102244	0.0873141				91.2065	7.5729	140.83	66.0501	47.8743	15.8298	5.9991			0.540024	-0.370297	0.0679413	0.112721	0.355386	-0.00274956	-0.301508	0.0573596	0.123467
121	19.6648	39.2043	4.3633	4.8218	10.3303	8.737	14.3945	65.8214			-0.233627	0.797984	-0.316195	0.0644416	0.285229	0.12629	0.0946495	0.0696022	0.111047	0.120115				87.2664	7.5288	140.344	79.8377	47.9145	14.8047	5.9286			0.473495	-0.373964	0.0642528	0.344996	0.356524	-0.0673291	-0.309717	0.0697511	0.127308
122	25.3022	36.1847	6.2085	4.4987	7.2717	8.2639	17.1501	59.3121			-0.013927	0.659499	-0.0270202	-0.00688465	-0.0953024	0.0653028	0.304203	-0.0361744	0.106212	0.0899263				92.2358	8.2374	145.798	75.9265	46.0539	15.5502	3.2575			0.557403	-0.315043	0.105617	0.279106	0.303848	-0.0203639	-0.62072	0.0414067	0.151582
123	27.5248	37.2921	5.9092	4.9316	9.0833	6.6515	15.3652	67.3043			0.0726917	0.710287	-0.0739257	0.0886807	0.130085	-0.142552	0.168468	0.0936994	0.130929	0.0906706				92.6024	8.3829	140.036	74.0267	46.019	15.4764	5.0256			0.563593	-0.302944	0.061921	0.2471	0.30286	-0.0250132	-0.414856	0.0618088	0.130203
124	25.7825	32.2435	5.192	4.5887	9.0366	7.0576	15.2305	67.5254			0.00479113	0.478748	-0.186323	0.0129834	0.124275	-0.0902018	0.158224	0.0972923	0.0749736	0.0703589				87.9146	9.0885	151.217	82.2766	45.6251	15.8708	6.194			0.48444	-0.244272	0.146707	0.386083	0.291708	-0.00016663	-0.278816	0.112241	0.113345
125	27.4085	35.1042	5.7812	4.7435	8.3824	9.2937	15.2072	66.0871			0.0681593	0.609945	-0.0939855	0.0471564	0.0428837	0.198055	0.156452	0.0739198	0.137823	0.074015				80.4919	10.6488	149.49	75.4843	47.0475	14.1824	3.4586			0.359107	-0.11453	0.133612	0.271656	0.331978	-0.106533	-0.597306	0.0397121	0.129193
126	26.9095	39.4221	5.5604	4.829	9.2672	10.5316	15.8922	68.9723			0.0487124	0.807973	-0.128589	0.0660311	0.152965	0.357633	0.208544	0.120804	0.204259	0.0992559				87.4877	10.4047	149.698	74.8758	50.8854	16.0547	5.6631			0.477232	-0.134827	0.135188	0.261405	0.440634	0.0114188	-0.34063	0.121489	0.113341
127	26.0323	38.4675	5.2951	5.3375	8.5114	9.4219	14.0544	68.2094			0.0145263	0.764193	-0.170166	0.178286	0.058933	0.214581	0.0687861	0.108407	0.154693	0.0963166				84.1113	9.5848	153.987	74.3073	53.9493	14.4172	5.8051			0.420221	-0.203004	0.16771	0.251827	0.527377	-0.091741	-0.324096	0.106899	0.12159
128	26.9856	33.6419	7.063	4.5158	7.2159	10.7519	17.6468	64.1036			0.0516781	0.542882	0.106895	-0.00310972	-0.102245	0.386032	0.341975	0.0416878	0.170724	0.0794863				84.2005	10.7667	155.237	69.3821	52.8907	14.2196	4.8792			0.421727	-0.104726	0.177189	0.168854	0.497407	-0.104189	-0.431901	0.0891943	0.123235
129	24.3991	39.0588	4.58	4.3978	7.4474	9.8439	18.4484	71.1591			-0.0491225	0.791311	-0.282234	-0.0291589	-0.0734429	0.268981	0.402934	0.15634	0.148201	0.119368				83.8513	8.9623	154.097	71.7896	48.2001	12.3571	5.2628			0.415831	-0.254766	0.168546	0.209413	0.36461	-0.221524	-0.387238	0.0421246	0.122438
130	22.5686	40.0485	5.9226	4.8614	7.7768	7.5288	19.1724	70.1534			-0.12046	0.8367	-0.0718257	0.0731836	-0.0324611	-0.0294593	0.457991	0.139997	0.156708	0.11649				82.61	10.1195	158.477	64.6754	48.1969	14.4704	5.1305			0.394872	-0.158542	0.201759	0.0895624	0.364519	-0.0883894	-0.402642	0.0573055	0.110152
131	24.0136	33.8411	5.7141	6.3159	8.3056	9.355	19.5251	70.6727			-0.0641461	0.552017	-0.104501	0.394273	0.0333287	0.205957	0.484813	0.148436	0.206272	0.088179				82.4503	10.9429	165.583	65.1343	48.0708	14.1383	5.6217			0.392175	-0.0900748	0.25565	0.0972934	0.360949	-0.109311	-0.34545	0.0801759	0.10389
132	21.9031	33.5573	5.097	4.0486	8.6523	8.1589	17.6887	67.5518			-0.146396	0.539002	-0.201212	-0.106247	0.0764629	0.0517672	0.345161	0.0977213	0.0820325	0.0893535				84.6644	10.8463	166.467	69.4943	46.1056	17.9263	5.5961			0.42956	-0.0981073	0.26235	0.170745	0.305312	0.129326	-0.348431	0.121536	0.100009
133	22.8392	35.0609	5.4551	4.5824	8.6038	8.5437	19.5135	69.44			-0.109915	0.60796	-0.145091	0.0115926	0.0704288	0.101372	0.483931	0.128405	0.143585	0.0948553				80.3114	10.0797	161.395	64.4148	47.2503	16.1231	5.1931			0.35606	-0.161852	0.223889	0.0851722	0.33772	0.0157278	-0.395353	0.0659091	0.103573
134	24.1098	37.8658	5.5511	4.7984	7.796	9.4647	18.9842	67.5219			-0.060397	0.736598	-0.130046	0.0592759	-0.0300724	0.220098	0.443679	0.0972354	0.167046	0.103429				83.1967	11.4177	146.713	64.2532	50.924	15.5274	5.1887			0.404778	-0.0505942	0.11255	0.0824498	0.441727	-0.0218002	-0.395865	0.0818922	0.108148
135	26.5779	33.9742	5.6275	4.36	10.2855	8.5446	19.7844	72.6966			0.0357893	0.558121	-0.118073	-0.0375035	0.279655	0.101488	0.504532	0.181325	0.188167	0.0866862				80.7923	9.6461	141.978	64.1376	41.9208	14.3024	5.8986			0.36418	-0.197906	0.0766476	0.0805023	0.186834	-0.0989732	-0.31321	0.0140106	0.0880447
136	25.8794	28.9628	5.999	4.6724	8.7045	8.6961	23.5195	74.3771			0.0085675	0.328289	-0.0598525	0.0314607	0.0829573	0.121018	0.788573	0.208633	0.188706	0.0958461				78.7167	10.0802	154.428	66.7341	46.2302	15.535	3.3624			0.329133	-0.16181	0.171057	0.124245	0.308839	-0.0213215	-0.608507	0.0202337	0.12368
137	27.6009	29.4479	6.9732	4.2979	9.0595	9.5818	25.8216	73.6055			0.0756575	0.350537	0.0928216	-0.0512125	0.127124	0.235194	0.963639	0.196094	0.248732	0.110472				82.7277	11.4693	165.553	63.5337	46.0433	14.4126	5.7637			0.396859	-0.0463035	0.255423	0.0703286	0.303548	-0.0920307	-0.328917	0.0798439	0.0968553
138	25.9727	32.5356	5.9649	5.0459	8.5288	8.6506	22.2965	74.1708			0.0122036	0.492145	-0.0651965	0.113913	0.0610978	0.115152	0.695568	0.20528	0.20377	0.0916467				82.2897	12.3722	171.952	62.7221	52.1262	15.1945	6.9462			0.389463	0.0287745	0.303944	0.0566559	0.475763	-0.0427724	-0.191235	0.145799	0.0931014
139	23.4609	27.3168	6.0454	3.4311	8.5801	8.6803	22.0414	80.8362			-0.0856859	0.2528	-0.0525808	-0.242564	0.0674802	0.118981	0.676168	0.313594	0.131024	0.100868				83.9206	12.1004	164.94	72.1209	50.4916	15.076	5.1076			0.417001	0.00617377	0.250771	0.214994	0.429485	-0.0502377	-0.405308	0.123268	0.112115
140	24.9655	28.2704	6.3715	5.0783	8.9597	7.7138	23.1134	66.7031			-0.0270489	0.296534	-0.00147523	0.121066	0.114708	-0.00561083	0.75769	0.0839298	0.167474	0.0919307				87.5726	11.8445	157.324	68.5531	54.3844	15.1353	3.4559			0.478665	-0.0151049	0.193019	0.154889	0.539696	-0.0465019	-0.59762	0.101006	0.143905
141	24.9203	31.2198	6.2828	4.4599	7.5087	9.3364	18.072	74.5397			-0.0288104	0.431799	-0.0153761	-0.01545	-0.0658164	0.203559	0.37431	0.211275	0.136936	0.069212				91.2103	12.588	167.365	71.8958	46.2371	14.285	4.4841			0.540088	0.0467187	0.269165	0.211202	0.309035	-0.100069	-0.477904	0.114034	0.124768
142	24.0905	28.4303	6.548	4.4383	8.3102	10.0892	20.6552	75.1062			-0.0611492	0.303868	0.0261854	-0.0202183	0.033901	0.300603	0.570753	0.220481	0.171803	0.076406				85.1572	11.7371	164.609	70.5351	49.6811	14.1573	6.5203			0.437881	-0.0240354	0.24826	0.188279	0.406539	-0.108114	-0.240824	0.129712	0.0983896
143	26.3877	32.451	6.5377	4.6553	8.5435	8.1543	20.8941	65.0377			0.0283769	0.488265	0.0245712	0.0276858	0.0629267	0.0511742	0.58892	0.056867	0.166098	0.0819961				86.7434	11.1986	139.751	71.7876	49.7988	14.9103	6.0044			0.464664	-0.0688128	0.059759	0.209379	0.409871	-0.0606765	-0.300891	0.101899	0.104379
144	26.1924	38.1115	5.4644	5.3123	8.4694	9.7463	15.2296	81.997			0.0207657	0.747866	-0.143634	0.172722	0.0537076	0.2564	0.158156	0.332457	0.199805	0.0940163				81.1449	11.4209	172.723	68.3781	53.9372	14.5798	6.3228			0.370133	-0.0503281	0.309791	0.15194	0.527035	-0.0814974	-0.263819	0.137608	0.106909
145	26.8291	34.9401	5.7967	4.5221	8.0961	7.0028	16.9494	71.6238			0.045579	0.602419	-0.0915564	-0.00171895	0.00726409	-0.0972661	0.28894	0.163892	0.114694	0.0832375				86.8314	11.6499	166.446	71.2271	47.7862	15.2181	5.1746			0.46615	-0.0312863	0.262191	0.199936	0.352892	-0.0412856	-0.397507	0.11587	0.110976
146	24.2527	36.7967	5.8359	4.6193	9.6029	8.6171	15.5084	79.3762			-0.054828	0.687567	-0.0854131	0.0197385	0.19473	0.110834	0.179358	0.289869	0.167732	0.0870923				88.8985	11.113	173.945	67.9733	55.0343	17.0843	5.6455			0.501053	-0.0759306	0.319057	0.145121	0.558095	0.0762818	-0.342679	0.168714	0.121022
147	27.1723	38.4469	7.1744	4.3024	8.9597	8.8494	13.1492	83.1604			0.0589542	0.763248	0.124353	-0.0502191	0.114708	0.14078	-5.10778e-05	0.351362	0.187892	0.0923903				86.0374	11.8636	166.425	64.7308	52.6726	18.5403	5.7063			0.452743	-0.0135167	0.262035	0.0904957	0.491232	0.168007	-0.3356	0.159343	0.10762
148	25.4078	39.3953	5.5841	3.5203	10.0732	9.6738	13.8429	75.4261			-0.00981161	0.806743	-0.124874	-0.222872	0.253242	0.247054	0.0527023	0.225679	0.153483	0.112331				85.7086	11.8089	168.45	65.6854	41.9572	14.9202	4.3862			0.447192	-0.0180651	0.277388	0.106578	0.187865	-0.0600528	-0.489303	0.0645144	0.113157
149	24.112	45.4097	5.2601	5.892	11.2168	9.5734	12.4057	76.5384			-0.0603113	1.08258	-0.175651	0.300695	0.395521	0.234111	-0.0565916	0.243754	0.245513	0.13942				90.8794	11.3415	164.476	67.1096	55.5892	12.7736	5.2584			0.534501	-0.0569304	0.247251	0.13057	0.573805	-0.195285	-0.38775	0.12088	0.136501
150	25.5887	27.1919	7.2446	4.1692	9.3147	9.4703	11.7217	78.655			-0.00276161	0.247072	0.135355	-0.0796238	0.158874	0.22082	-0.108607	0.278149	0.10616	0.0532379				87.2188	11.2387	166.538	65.165	50.1637	12.3875	6.3933			0.472691	-0.0654784	0.262888	0.0978105	0.420202	-0.219609	-0.255611	0.101842	0.11169
151	23.888	34.4623	5.7926	4.414	9.4172	9.6236	11.2054	76.5076			-0.069041	0.580507	-0.0921989	-0.0255827	0.171627	0.240582	-0.14787	0.243254	0.11266	0.0863698				87.568	11.5904	176.248	70.6607	57.0074	13.1915	6.5132			0.478588	-0.0362338	0.336521	0.190395	0.613956	-0.168958	-0.24165	0.167517	0.124145
152	22.5937	35.1373	5.4634	6.0027	9.2397	8.7872	9.3824	74.7867			-0.119482	0.611463	-0.14379	0.325132	0.149543	0.132762	-0.286503	0.215289	0.110552	0.102225				90.4316	12.8019	164.185	66.0695	63.9219	12.807	5.2063			0.526939	0.064505	0.245045	0.113048	0.809715	-0.193181	-0.393816	0.167465	0.154796
153	25.537	35.6625	6.0599	4.8443	7.5215	7.2286	10.3978	78.0407			-0.00477645	0.63555	-0.0503084	0.0694087	-0.0642239	-0.0681582	-0.209285	0.268167	0.0720467	0.0939465				88.1461	11.7578	165.146	71.334	48.7777	12.1375	5.8148			0.488349	-0.0223141	0.252333	0.201737	0.380963	-0.235358	-0.322967	0.106106	0.116433
154	22.4745	35.9257	6.2745	4.6985	11.011	7.3401	12.5841	73.6415			-0.124128	0.647621	-0.0166768	0.0372224	0.369917	-0.0537846	-0.0430249	0.196679	0.126728	0.0933761				85.0701	11.2664	172.567	82.2685	49.462	11.728	5.7963			0.43641	-0.0631751	0.308607	0.385947	0.400336	-0.261156	-0.325121	0.125978	0.12552
155	25.608	36.9721	6.7534	3.6148	10.5773	8.3838	11.4257	73.0993			-0.00200945	0.695611	0.0583751	-0.202011	0.315959	0.0807592	-0.131117	0.187869	0.125429	0.100096				86.859	11.9456	163.647	74.7882	47.8268	13.4992	3.9735			0.466616	-0.00669818	0.240967	0.259929	0.354041	-0.149573	-0.537355	0.0897039	0.131253
156	22.0854	36.2683	5.4149	5.0225	7.935	8.6942	11.4266	76.4127			-0.139292	0.663333	-0.151391	0.108747	-0.0127789	0.120773	-0.131049	0.241711	0.0875069	0.0966627				86.5055	10.6738	185.551	72.9706	56.4087	14.4635	5.9259			0.460647	-0.112451	0.407066	0.229309	0.597006	-0.0888241	-0.310031	0.16896	0.129442
157	20.893	38.902	7.5005	5.4644	10.3202	8.0232	11.369	77.5895			-0.185762	0.78412	0.175459	0.206299	0.283972	0.0342741	-0.135429	0.260835	0.177971	0.106695				87.9469	11.2952	194.574	79.0989	60.2529	13.2728	6.0344			0.484985	-0.0607803	0.475492	0.33255	0.705841	-0.163836	-0.297398	0.210979	0.144544
158	19.8148	36.1373	6.3003	4.9505	8.2864	9.6403	10.8992	77.3182			-0.227781	0.657325	-0.0126335	0.0928529	0.03094	0.242735	-0.171155	0.256426	0.108589	0.0994032				86.308	9.9917	150.225	80.9646	53.9731	13.3533	5.8157			0.457312	-0.169169	0.139185	0.363981	0.528051	-0.158765	-0.322862	0.119676	0.128881
159	20.7114	32.9577	7.4561	5.2835	7.4776	8.5641	8.5372	77.6025			-0.192839	0.511503	0.1685	0.166365	-0.0696857	0.104002	-0.350777	0.261046	0.0747643	0.0960874				85.7128	9.0514	175.791	73.2652	54.2693	14.1337	4.5503			0.447262	-0.247357	0.333055	0.234272	0.536437	-0.109601	-0.470196	0.10341	0.144176
160	23.5614	32.1321	6.5697	4.3276	8.6853	8.4396	11.2523	74.6376			-0.0817692	0.473639	0.0295862	-0.044656	0.0805685	0.0879524	-0.144303	0.212866	0.0767355	0.0690685				82.7506	9.4314	174.031	81.7595	52.1816	12.9331	4.791			0.397246	-0.215759	0.319709	0.377372	0.477332	-0.185237	-0.442171	0.10407	0.140648
161	22.3223	34.2962	6.806	4.1926	8.5654	7.9331	11.2835	65.8227			-0.130059	0.572889	0.0666185	-0.0744581	0.0656513	0.0226592	-0.141931	0.0696233	0.0563742	0.0801216				82.3471	10.8883	174.482	84.5164	57.0523	13.2546	5.269			0.390433	-0.0946149	0.323134	0.423816	0.615228	-0.164983	-0.386516	0.158071	0.140207
162	24.0115	31.5676	6.8111	4.7975	10.4748	8.5325	10.9772	64.9324			-0.064228	0.44775	0.0674177	0.0590773	0.303206	0.0999281	-0.165224	0.0551558	0.100385	0.0686975				89.2226	11.1954	160.429	90.0975	57.2988	14.6284	6.5573			0.506525	-0.0690789	0.216563	0.517839	0.622206	-0.0784357	-0.236516	0.211301	0.130301
163	26.2161	31.8545	7.1589	3.883	9.0979	7.6868	10.8178	70.7993			0.0216893	0.460908	0.121924	-0.142804	0.131902	-0.00909141	-0.177346	0.150493	0.0697094	0.0708205				87.401	11.2748	175.232	85.1737	60.1853	12.8701	3.3236			0.475768	-0.0624766	0.328815	0.43489	0.703927	-0.189206	-0.613024	0.154099	0.173781
164	24.7064	30.0103	6.9112	4.8029	9.011	9.7509	7.8964	78.6376			-0.0371465	0.376329	0.0831051	0.0602694	0.12109	0.256993	-0.399507	0.277866	0.0923749	0.0848109				87.5327	12.0605	187.731	81.6086	55.7175	13.25				0.477991	0.002856	0.423604	0.37483	0.577438	-0.165273	-1	0.098778	0.209357
165	24.3367	29.4097	7.13	5.396	8.3239	7.9898	7.1408	72.1864			-0.0515543	0.348785	0.117395	0.1912	0.0356055	0.0299684	-0.456968	0.173034	0.0484331	0.0841775				85.8229	10.1994	176.104	87.644	54.0612	14.8085				0.449121	-0.151898	0.335431	0.476506	0.530546	-0.0670897	-1	0.0818022	0.20722
166	24.9246	33.7503	6.0413	4.9514		8.2035	9.2035	71.8431			-0.0286428	0.547853	-0.0532233	0.0930516	-1	0.0575166	-0.300107	0.167455	-0.0645121	0.158146				84.0153	9.5027	187.433	76.7121	45.4572	12.4392				0.4186	-0.20983	0.421343	0.29234	0.286955	-0.216352	-1	-0.000991977	0.195874
167	24.3431	40.2332	7.0175	4.1089		8.0651	10.8457	79.3138			-0.0513049	0.845171	0.0997642	-0.0929354	-1	0.0396754	-0.175224	0.288855	-0.00574986	0.181806				84.432	10.6413	176.917	83.3901	47.6922	12.9202				0.425636	-0.115153	0.341599	0.404842	0.350231	-0.186049	-1	0.0315864	0.196717
168	26.364	41.3488	6.7595			9.5967	10.4428	72.9025			0.0274532	0.896335	0.0593311	-1	-1	0.237115	-0.205863	0.18467	-0.10012	0.225998					10.7115	183.852	79.2933	44.4155	14.8967				-1	-0.109316	0.394188	0.335825	0.257463	-0.0615333	-1	-0.169053	0.22626
169	22.6734		6.195			7.1608		70.0598			-0.116376	-1	-0.0291358	-1	-1	-0.0768983	-1	0.138476	-0.510492	0.186828					10.7478	178.744	81.4008	51.8347	14.0881				-1	-0.106298	0.355453	0.371329	0.46751	-0.112474	-1	-0.146354	0.236885
170	22.878		6.5346			7.5883		78.4863			-0.108403	-1	0.0240854	-1	-1	-0.0217891	-1	0.275408	-0.478837	0.200641					11.3033		79.4128	58.7207	15.3351				-1	-0.0601068	-1	0.337838	0.662462	-0.0339148	-1	-0.299103	0.264193
171	23.4738		6.0877			8.948		79.7876			-0.0851831	-1	-0.0459516	-1	-1	0.15349	-1	0.296554	-0.460136	0.208184					11.3065		83.4643	53.9673	14.8845				-1	-0.0598407	-1	0.406092	0.527887	-0.0623019	-1	-0.312595	0.256674
