# Supplementary material for: Hugin-AstA circuitry is a novel central energy sensor that directly regulates sweet sensation in Drosophila and mouse
Source: eLife. 2026 May 5;14:RP108551. doi: 10.7554/eLife.108551 (PMC13143273; doi:10.7554/eLife.108551)
Supplement: Figure 6—figure supplement 1—source data 1. [file elife-108551-fig6-figsupp1-data1.xlsx]

## Sheet: A
		w1118	ASTA-R1 KO	PK2-R1 KO
	6	7	8	9
		0.62	0.845	1.026
		0.487	0.973	1.048
		0.573	0.826	1.104
		0.66	1.044	1.235
		0.419	1.173	1.265
		0.44	0.904	0.817
		0.738	0.698	0.791
		0.402	0.674	0.732
	Mean	0.542375
		w1118	ASTA-R1 KO	PK2-R1 KO				Bonferroni's multiple comparisons test	95% confidence interval	P value	F (DFn, DFd)
		1.14312	1.55796	1.89168				w1118 vs. ASTA-R1 KO	-1.020 to -0.2699	0.0009	F (2, 21) = 16.25
		0.897903	1.79396	1.93224				w1118 vs. PK2-R1 KO	-1.223 to -0.4729	<0.0001
		1.05646	1.52293	2.03549
		1.21687	1.92487	2.27702
		0.772528	2.16271	2.33233
		0.811247	1.66674	1.50634
		1.36068	1.28693	1.4584
		0.741185	1.24268	1.34962
	Mean	1	1.64485	1.84789
	TTEST		0.000331184	8.24706e-05
	SEM	0.080797	0.110321	0.132267

## Sheet: B
		W1118	PK2-R1	AstA-R1
			96.0827	61.0905
		47.7529	97.9103	54.044
		45.6137	96.0827	76.8415
		46.6833	111.226	64.1993
		49.6782	118.536	67.7225
		46.0415	119.32	60.676
		45.1858	115.926	58.3963
		47.9668	115.926	70.8312
		46.2554	108.876
		W1118	PK2-R1	AstA-R1
			1.92793	1.33368
		1.01825	1.96461	1.17985
		0.972631	1.92793	1.67755
		0.995439	2.23179	1.40155
		1.0593	2.37848	1.47847
		0.981754	2.39419	1.32464
		0.963508	2.32609	1.27487
		1.02281	2.32609	1.54634
		Bonferroni's multiple comparisons test	95% confidence interval	P value	F (DFn, DFd)
		W1118 vs. PK2-R1	-1.379 to -0.9865	<0.0001	F (2, 20) = 112.4
		W1118 vs. AstA-R1	-0.5964 to -0.2040	0.0002

## Sheet: C
		1	w/Gr5a	ASTA-R1i/w	ASTA-R1i/Gr5a
		0	1.363	1.186	2.992
		0	1.569	1.679	2.7
		0	1.224	1.365	2.614
		0	1.474	1.594	2.54
		0	0.985	1.44	2.419
		0	0.798	1.692	2.633
		0	0.722	1.441	2.667
		0	1.585	1.056	3.145
		Mean			2.71375
			w/Gr5a	ASTA-R1i/w	ASTA-R1i/Gr5a
			0.502257	0.437034	1.10253
			0.578167	0.618701	0.994933
			0.451036	0.502994	0.963243
			0.54316	0.587379	0.935974
			0.362966	0.530631	0.891386
			0.294058	0.623491	0.970244
			0.266053	0.531	0.982773
			0.584063	0.389129	1.15891
		Mean	0.44772	0.527545	1
		SEM	0.044621	0.0296017	0.0311166
		Bonferroni's multiple comparisons test	95% confidence interval	P value	F (DFn, DFd)
		ASTA-R1i/Gr5a vs. w/Gr5a	0.4302 to 0.6743	<0.0001	F (2, 21) = 69.69
		ASTA-R1i/Gr5a vs. ASTA-R1i/w	0.3504 to 0.5945	<0.0001
