# Supplementary material for: Hugin-AstA circuitry is a novel central energy sensor that directly regulates sweet sensation in Drosophila and mouse
Source: eLife. 2026 May 5;14:RP108551. doi: 10.7554/eLife.108551 (PMC13143273; doi:10.7554/eLife.108551)
Supplement: Figure 6—source data 1. [file elife-108551-fig6-data1.xlsx]

## Sheet: B
	6.25	12.5	25	50	100	200	400	800						6.25	12.5	25	50	100	200	400	800			Bonferroni's multiple comparisons test	95% confidence interval	P value	F (DFn, DFd)			Bonferroni's multiple comparisons test	95% confidence interval	P value	F (DFn, DFd)
hugin/shi fed 30℃	0/10	0/10	0/10	1/10	0/10	3/10	8/10	10/10					hugin/shi fed 30℃	0	0	0	0.1	0	0.3	0.8	1			hugin-Gal4>UAS-Shi fed 30℃ vs. CS>UAS-Shi fed 30℃	0.03963 to 0.1104	<0.0001	F (14, 72) = 4.738			Row 1			F (14, 72) = 4.738
	0/10	0/10	0/10	0/10	1/10	3/10	9/10	10/10						0	0	0	0	0.1	0.3	0.9	1			hugin-Gal4>UAS-Shi fed 30℃ vs. hugin-Gal4>w1118 fed 30℃	0.02713 to 0.09787	0.0003				hugin-Gal4>UAS-Shi fed 30℃ vs. CS>UAS-Shi fed 30℃	-0.1000 to 0.1000	>0.9999
	0/10	0/10	0/10	0/10	0/10	4/10	8/10	10/10						0	0	0	0	0	0.4	0.8	1									hugin-Gal4>UAS-Shi fed 30℃ vs. hugin-Gal4>w1118 fed 30℃	-0.1000 to 0.1000	>0.9999
	0/10	0/10	0/10	0/10	0/10	3/10	8/10	10/10						0	0	0	0	0	0.3	0.8	1									Row 2
																														hugin-Gal4>UAS-Shi fed 30℃ vs. CS>UAS-Shi fed 30℃	-0.1000 to 0.1000	>0.9999
																														hugin-Gal4>UAS-Shi fed 30℃ vs. hugin-Gal4>w1118 fed 30℃	-0.1000 to 0.1000	>0.9999
																														Row 3
																														hugin-Gal4>UAS-Shi fed 30℃ vs. CS>UAS-Shi fed 30℃	-0.1000 to 0.1000	>0.9999
																														hugin-Gal4>UAS-Shi fed 30℃ vs. hugin-Gal4>w1118 fed 30℃	-0.1000 to 0.1000	>0.9999
CS/shi fed 30℃	0/10	0/10	0/10	1/10	1/10	1/10	4/10	8/10					CS/shi fed 30℃	0	0	0	0.1	0.1	0.1	0.4	0.8									Row 4
	0/10	0/10	0/10	0/10	0/10	0/10	5/10	10/10						0	0	0	0	0	0	0.5	1									hugin-Gal4>UAS-Shi fed 30℃ vs. CS>UAS-Shi fed 30℃	-0.1000 to 0.1000	>0.9999
	0/10	0/10	0/10	0/10	0/10	2/10	4/10	9/10						0	0	0	0	0	0.2	0.4	0.9									hugin-Gal4>UAS-Shi fed 30℃ vs. hugin-Gal4>w1118 fed 30℃	-0.07504 to 0.1250	>0.9999
	0/10	0/10	0/10	0/10	0/10	3/10	6/10	10/10						0	0	0	0	0	0.3	0.6	1									Row 5
																														hugin-Gal4>UAS-Shi fed 30℃ vs. CS>UAS-Shi fed 30℃	-0.1000 to 0.1000	>0.9999
																														hugin-Gal4>UAS-Shi fed 30℃ vs. hugin-Gal4>w1118 fed 30℃	-0.1000 to 0.1000	>0.9999
																														Row 6
																														hugin-Gal4>UAS-Shi fed 30℃ vs. CS>UAS-Shi fed 30℃	0.07496 to 0.2750	0.0003
hugin/w1118 fed 30℃	0/10	0/10	0/10	0/10	1/10	2/10	6/10	8/10					hugin/w1118 fed 30℃	0	0	0	0	0.1	0.2	0.6	0.8									hugin-Gal4>UAS-Shi fed 30℃ vs. hugin-Gal4>w1118 fed 30℃	-4.077e-005 to 0.2000	0.0501
	0/10	0/10	0/10	0/10	0/10	1/10	4/10	9/10						0	0	0	0	0	0.1	0.4	0.9									Row 7
	0/10	0/10	0/10	0/10	0/10	2/10	5/10	9/10						0	0	0	0	0	0.2	0.5	0.9									hugin-Gal4>UAS-Shi fed 30℃ vs. CS>UAS-Shi fed 30℃	0.2500 to 0.4500	<0.0001
	0/10	0/10	0/10	0/10	0/10	4/10	7/10	10/10						0	0	0	0	0	0.4	0.7	1									hugin-Gal4>UAS-Shi fed 30℃ vs. hugin-Gal4>w1118 fed 30℃	0.1750 to 0.3750	<0.0001
																														Row 8
																														hugin-Gal4>UAS-Shi fed 30℃ vs. CS>UAS-Shi fed 30℃	-0.02504 to 0.1750	0.1808
																														hugin-Gal4>UAS-Shi fed 30℃ vs. hugin-Gal4>w1118 fed 30℃	-4.077e-005 to 0.2000	0.0501
hugin/shi fed 20℃	0/10	0/10	0/10	0/10	0/10	0/10	4/10	7/10					hugin/shi fed 20℃	0	0	0	0	0	0	0.4	0.7
	0/10	0/10	0/10	0/10	1/10	1/10	5/10	8/10						0	0	0	0	0.1	0.1	0.5	0.8
	0/10	0/10	0/10	0/10	0/10	3/10	7/10	10/10						0	0	0	0	0	0.3	0.7	1
	0/10	0/10	0/10	0/10	0/10	2/10	4/10	9/10						0	0	0	0	0	0.2	0.4	0.9
																							Bonferroni's multiple comparisons test	95% confidence interval	P value	F (DFn, DFd)			Bonferroni's multiple comparisons test	95% confidence interval	P value	F (DFn, DFd)
																							Hugin-Gal4>UAS-shi 20℃ vs. CS>UAS-shi 20℃	-0.05289 to 0.05289	>0.9999	F (14, 72) = 0.3746			Row 1			F (14, 72) = 0.3746
CS/shi fed 20℃	0/10	0/10	0/10	0/10	0/10	1/10	5/10	8/10					CS/shi fed 20℃	0	0	0	0	0	0.1	0.5	0.8		Hugin-Gal4>UAS-shi 20℃ vs. Hugin-Gal4>w1118 20℃	-0.08727 to 0.01852	0.2824				Hugin-Gal4>UAS-shi 20℃ vs. CS>UAS-shi 20℃	-0.1496 to 0.1496	>0.9999
	0/10	0/10	0/10	0/10	0/10	0/10	3/10	6/10						0	0	0	0	0	0	0.3	0.6								Hugin-Gal4>UAS-shi 20℃ vs. Hugin-Gal4>w1118 20℃	-0.1496 to 0.1496	>0.9999
	0/10	0/10	0/10	0/10	0/10	5/10	7/10	10/10						0	0	0	0	0	0.5	0.7	1								Row 2
	0/10	0/10	0/10	0/10	0/10	2/10	5/10	9/10						0	0	0	0	0	0.2	0.5	0.9								Hugin-Gal4>UAS-shi 20℃ vs. CS>UAS-shi 20℃	-0.1496 to 0.1496	>0.9999
																													Hugin-Gal4>UAS-shi 20℃ vs. Hugin-Gal4>w1118 20℃	-0.1496 to 0.1496	>0.9999
																													Row 3
																													Hugin-Gal4>UAS-shi 20℃ vs. CS>UAS-shi 20℃	-0.1496 to 0.1496	>0.9999
																													Hugin-Gal4>UAS-shi 20℃ vs. Hugin-Gal4>w1118 20℃	-0.1496 to 0.1496	>0.9999
hugin/w1118 fed 20℃	0/10	0/10	0/10	0/10	1/10	2/10	5/10	9/10					hugin/w1118 fed 20℃	0	0	0	0	0.1	0.2	0.5	0.9								Row 4
	0/10	0/10	0/10	0/10	1/10	5/10	7/10	10/10						0	0	0	0	0.1	0.5	0.7	1								Hugin-Gal4>UAS-shi 20℃ vs. CS>UAS-shi 20℃	-0.1496 to 0.1496	>0.9999
	0/10	0/10	0/10	0/10	0/10	3/10	6/10	9/10						0	0	0	0	0	0.3	0.6	0.9								Hugin-Gal4>UAS-shi 20℃ vs. Hugin-Gal4>w1118 20℃	-0.1496 to 0.1496	>0.9999
	0/10	0/10	0/10	0/10	0/10	2/10	4/10	8/10						0	0	0	0	0	0.2	0.4	0.8								Row 5
																													Hugin-Gal4>UAS-shi 20℃ vs. CS>UAS-shi 20℃	-0.1246 to 0.1746	>0.9999
																													Hugin-Gal4>UAS-shi 20℃ vs. Hugin-Gal4>w1118 20℃	-0.1746 to 0.1246	>0.9999
																													Row 6
																													Hugin-Gal4>UAS-shi 20℃ vs. CS>UAS-shi 20℃	-0.1996 to 0.09961	0.8934
																													Hugin-Gal4>UAS-shi 20℃ vs. Hugin-Gal4>w1118 20℃	-0.2996 to -0.0003943	0.0493
																													Row 7
																													Hugin-Gal4>UAS-shi 20℃ vs. CS>UAS-shi 20℃	-0.1496 to 0.1496	>0.9999
																													Hugin-Gal4>UAS-shi 20℃ vs. Hugin-Gal4>w1118 20℃	-0.1996 to 0.09961	0.8934
																													Row 8
																													Hugin-Gal4>UAS-shi 20℃ vs. CS>UAS-shi 20℃	-0.1246 to 0.1746	>0.9999
																													Hugin-Gal4>UAS-shi 20℃ vs. Hugin-Gal4>w1118 20℃	-0.1996 to 0.09961	0.8934

## Sheet: C
		20℃							30℃
		w/shi	hugin/shi	hugin/w1118					w/shi	hugin/shi	hugin/w1118
		0.279	0.376	0.32					0.518	0.832	0.507
		0.312	0.258	0.393					0.356	1.092	0.391
		0.214	0.333	0.309					0.349	0.726	0.433
		0.269	0.397	0.613					0.265	1.02	0.417
		0.329	0.221	0.624					0.287	0.597	0.304
		0.484	0.214	0.48					0.258	0.74	0.289
		0.398	0.236	0.358					0.208	1.04	0.407
		0.401	0.193	0.552					0.257	0.887	0.443
			0.2785					Mean		0.86675
		20℃							30℃
		w/shi	hugin/shi	hugin/w1118					w/shi	hugin/shi	hugin/w1118
		1.0018	1.35009	1.14901					0.597635	0.959908	0.584944
		1.12029	0.926391	1.41113					0.41073	1.25988	0.45111
		0.768402	1.19569	1.10952					0.402654	0.837612	0.499567
		0.965889	1.42549	2.20108					0.30574	1.17681	0.481108
		1.18133	0.793537	2.24057					0.331122	0.68878	0.350736
		1.73788	0.768402	1.72352					0.297664	0.853764	0.333429
		1.42908	0.847397	1.28546					0.239977	1.19988	0.46957
		1.43986	0.692998	1.98205					0.29651	1.02336	0.511105
	Mean	1.20557	1	1.63779				Mean	0.360254	1	0.460196
	SEM	0.110692	0.1001	0.163663				SEM	0.039407	0.0714041	0.0293875
Bonferroni's multiple comparisons test	95% confidence interval	P value	F (DFn, DFd)					Bonferroni's multiple comparisons test	95% confidence interval	P value	F (DFn, DFd)
hugin/shi 20 vs. w/shi 20	-0.6421 to 0.2310	0.537	F (2, 21) = 6.481					hugin/shi 30 vs. w/shi 30	0.4689 to 0.8106	<0.0001	F (2, 21) = 47.28
hugin/shi 20 vs. hugin/w1118 20	-1.074 to -0.2013	0.004						hugin/shi 30 vs. hugin/w1118 30	0.3689 to 0.7107	<0.0001

## Sheet: D
		20℃							30℃
		w/shi	ASTA/shi	ASTA/w1118					w/shi	ASTA/shi	ASTA/w1118
		0.279	0.141	0.087					0.518	0.759	0.071
		0.312	0.136	0.2					0.356	0.668	0.178
		0.214	0.104	0.191					0.349	0.606	0.179
		0.269	0.136	0.147					0.265	0.871	0.291
		0.329	0.122	0.132					0.287	0.438	0.218
		0.484	0.147	0.167					0.258	0.628	0.262
		0.398	0.236	0.186					0.208	0.742	0.178
		0.401	0.167	0.111					0.257	0.46	0.343
	Mean		0.148625					Mean		0.6465
		20℃							30℃
		w/shi	ASTA/shi	ASTA/w1118					w/shi	ASTA/shi	ASTA/w1118
		1.87721	0.948696	0.585366					0.801237	1.17401	0.109822
		2.09924	0.915055	1.34567					0.550657	1.03326	0.275329
		1.43987	0.699748	1.28511					0.53983	0.937355	0.276875
		1.80992	0.915055	0.989066					0.409899	1.34725	0.450116
		2.21362	0.820858	0.888141					0.443929	0.677494	0.3372
		3.25652	0.989066	1.12363					0.399072	0.971384	0.405259
		2.67788	1.58789	1.25147					0.321732	1.14772	0.275329
		2.69807	1.12363	0.746846					0.397525	0.711524	0.530549
	Mean	2.25904	1	1.02691				Mean	0.482985	1	0.33256
	SEM	0.207419	0.0945218	0.096561				SEM	0.0528322	0.0808178	0.0458237
Bonferroni's multiple comparisons test	95% confidence interval	P value	F (DFn, DFd)					Bonferroni's multiple comparisons test	95% confidence interval	P value	F (DFn, DFd)
ASTA/shi 20 vs. w/shi 20	-1.747 to -0.7711	<0.0001	F (2, 21) = 25.33					ASTA/shi 30 vs. w/shi 30	0.3064 to 0.7277	<0.0001	F (2, 21) = 32.19
ASTA/shi 20 vs. ASTA/w1118 20	-0.5148 to 0.4610	>0.9999						ASTA/shi 30 vs. ASTA/w1118 30	0.4568 to 0.8781	<0.0001
