# Supplementary material for: Hugin-AstA circuitry is a novel central energy sensor that directly regulates sweet sensation in Drosophila and mouse
Source: eLife. 2026 May 5;14:RP108551. doi: 10.7554/eLife.108551 (PMC13143273; doi:10.7554/eLife.108551)
Supplement: Figure 7—figure supplement 1—source data 1. [file elife-108551-fig7-figsupp1-data1.xlsx]

## Sheet: A
	6.25	12.5	25	50	100	200	400	800
w1118 fed H2O	0/10	0/10	0/10	0/10	1/10	4/10	5/10	8/10
	0/10	0/10	0/10	0/10	2/10	4/10	8/10	9/10
	0/10	0/10	0/10	0/10	0/10	1/10	6/10	8/10
	0/10	0/10	0/10	0/10	1/10	4/10	7/10	9/10
w1118 fed NMU	0/10	0/10	0/10	0/10	1/10	2/10	4/10	8/10
	0/10	0/10	0/10	0/10	0/10	3/10	6/10	7/10
	0/10	0/10	0/10	0/10	2/10	2/10	4/10	7/10
	0/10	0/10	0/10	0/10	0/10	1/10	4/10	8/10
	6.25	12.5	25	50	100	200	400	800
w1118 fed H2O	0	0	0	0	0.1	0.4	0.5	0.8			Bonferroni's multiple comparisons test	95% confidence interval	P value	F (DFn, DFd)
	0	0	0	0	0.2	0.4	0.8	0.9			w1118 fed H2O vs. w1118 fed NMU	0.01795 to 0.09455	0.0025	F (14, 72) = 1.741			Bonferroni's multiple comparisons test	95% confidence interval	P value	F (DFn, DFd)
	0	0	0	0	0	0.1	0.6	0.8									w1118 fed H2O - w1118 fed NMU			F (7, 48) = 2.389
	0	0	0	0	0.1	0.4	0.7	0.9									Row 1	-0.1415 to 0.1415	>0.9999
																	Row 2	-0.1415 to 0.1415	>0.9999
mean	0	0	0	0	0.1	0.325	0.65	0.85									Row 3	-0.1415 to 0.1415	>0.9999
SEM	0	0	0	0	0.0408248	0.075	0.0645497	0.0288675									Row 4	-0.1415 to 0.1415	>0.9999
w1118 fed NMU	0	0	0	0	0.1	0.2	0.4	0.8									Row 5	-0.1165 to 0.1665	>0.9999
	0	0	0	0	0	0.3	0.6	0.7									Row 6	-0.01651 to 0.2665	0.119
	0	0	0	0	0.2	0.2	0.4	0.7									Row 7	0.05849 to 0.3415	0.0015
	0	0	0	0	0	0.1	0.4	0.8									Row 8	-0.04151 to 0.2415	0.3909
mean	0	0	0	0	0.075	0.2	0.45	0.75
SEM	0	0	0	0	0.0478714	0.0408248	0.05	0.0288675

## Sheet: B
	6.25	12.5	25	50	100	200	400	800
w1118 ST H2O	0/10	1/10	1/10	3/10	6/10	9/10	10/10	10/10
	0/10	1/10	2/10	4/10	4/10	8/10	10/10	10/10
	1/10	2/10	2/10	5/10	8/10	9/10	10/10	10/10
	0/10	0/10	1/10	2/10	5/10	7/10	10/10	10/10
w1118 ST NMu	0/10	1/10	2/10	2/10	4/10	5/10	8/10	10/10
	0/10	0/10	0/10	0/10	3/10	6/10	8/10	10/10
	0/10	0/10	1/10	1/10	5/10	7/10	9/10	10/10
	0/10	0/10	0/10	2/10	5/10	7/10	9/10	10/10
	6.25	12.5	25	50	100	200	400	800
w1118 ST H2O	0	0.1	0.1	0.3	0.6	0.9	1	1			Bonferroni's multiple comparisons test	95% confidence interval	P value	F (DFn, DFd)
	0	0.1	0.2	0.4	0.4	0.8	1	1			w1118 ST H2O vs. w1118 ST NMu	0.06688 to 0.1581	<0.0001	F (14, 72) = 1.386
	0.1	0.2	0.2	0.5	0.8	0.9	1	1
	0	0	0.1	0.2	0.5	0.7	1	1
mean	0.025	0.1	0.15	0.35	0.575	0.825	1	1
SEM	0.025	0.0408248	0.0288675	0.0645497	0.0853913	0.0478714	0	0
w1118 ST NMu	0	0.1	0.2	0.2	0.4	0.5	0.8	1
	0	0	0	0	0.3	0.6	0.8	1			Bonferroni's multiple comparisons test	95% confidence interval	P value	F (DFn, DFd)
	0	0	0.1	0.1	0.5	0.7	0.9	1			w1118 ST H2O - w1118 ST NMu			F (7, 48) = 1.922
	0	0	0	0.2	0.5	0.7	0.9	1			Row 1	-0.1427 to 0.1927	>0.9999
											Row 2	-0.09270 to 0.2427	>0.9999
mean	0	0.025	0.075	0.125	0.425	0.625	0.85	1			Row 3	-0.09270 to 0.2427	>0.9999
SEM	0	0.025	0.0478714	0.0478714	0.0478714	0.0478714	0.0288675	0			Row 4	0.05730 to 0.3927	0.0029
											Row 5	-0.01770 to 0.3177	0.1098
											Row 6	0.03230 to 0.3677	0.0106
											Row 7	-0.01770 to 0.3177	0.1098
											Row 8	-0.1677 to 0.1677	>0.9999
