# Supplementary material for: Hugin-AstA circuitry is a novel central energy sensor that directly regulates sweet sensation in Drosophila and mouse
Source: eLife. 2026 May 5;14:RP108551. doi: 10.7554/eLife.108551 (PMC13143273; doi:10.7554/eLife.108551)
Supplement: Figure 7—source data 1. [file elife-108551-fig7-data1.xlsx]

## Sheet: A
小鼠 ST24h refed20%glucose,after1h collect blood from the lower jaw for NMU testing
	Untitled 23.01.2024 18:04:54
	standard curve	ST	refed-glucose
A	3.059	0.176	0.194
B	1.683	0.201	0.207
C	1.04	0.196	0.227
D	0.585	0.184	0.186
E	0.338	0.167	0.188
F	0.19	0.162	0.225
G	0.139
H	0.063
	3.059	10
	1.683	5
	1.04	2.5
	0.585	1.25
	0.338	0.625
	0.19	0.3125
	0.139	0.15625
	0.063	0
		ST	refed-glucose				P value	0.0373
	ng/mL	2.28931	2.75885				95% confidence interval	0.04403 to 1.184
		2.94193	3.09908				F, DFn, Dfd	1.378, 5, 5
		2.81113	3.62433
		2.49777	2.54994
		2.05522	2.60214
		1.92536	3.57171
	Mean	2.42012	3.03434
	SEM	0.165958	0.194798
	TTEST		0.0373044
			*

## Sheet: B
mouse ST12h refed 20% glucose 1h after detect sugar water preference
ST					refed 20% glucose
before	after				before	after
77.35	75.82	1.53		1.53	80.34	79.8	0.54
78.56	77.25	1.31		1.31	81.61	81.09	0.52
79.26	78.53	0.73		0.73	79.7	79.4	0.3
77.88	76.76	1.12		1.12	78.93	78.22	0.71
77.56	76.68	0.88		0.88	76.74	76.39	0.35
77.94	76.92	1.02		1.02	78.68	77.97	0.71
75.12	74.07	1.05		1.05	78.31	77.88	0.43
56.89	56.49	0.4		0.4	79.4	79.09	0.31
59.36	59.06	0.3		0.3	82.36	81.99	0.37
58.07	57.52	0.55		0.55	82.49	81.91	0.58
60.22	59.95	0.27		0.27	79.44	78.87	0.57
59.68	59.36	0.32		0.32	77.89	77.27	0.62
60.25	60	0.25		0.25	78.89	78.42	0.47
57.63	57.33	0.3		0.3	61.54	61.04	0.5
				ST	refed 20% glucose			P value	0.0002
				3.825	1.74194			95% confidence interval	-3.272 to -1.343
				4.36667	1.40541			F, DFn, Dfd	4.985, 6, 6
				1.32727	0.517241
				4.14815	1.24561
				2.75	0.564516
				4.08	1.51064
				3.5	0.86
			Mean	3.42816	1.12076
			SEM	0.404155	0.18101
			P-TTEST		0.0002
					***

## Sheet: C
	(ip)UMU				saline
	before	after			before	after
1	77.67	76.7	0.97		74.27	73.01	1.26	sucrose
2	79.43	78.49	0.94		76.29	75.39	0.9
3	78.62	78.14	0.48		78.52	77.25	1.27
4	78.46	78.01	0.45		79.26	78.23	1.03
5	79.2	78.26	0.94		75.54	74.5	1.04
6	84.28	83.78	0.5		78.71	77.71	1
7	78.16	77.49	0.67		80.02	79.12	0.9
1	75.5	74.92	0.58		77.08	76.56	0.52	H2O
2	78.02	77.18	0.84		74.82	74.45	0.37
3	76.94	76.45	0.49		78.32	77.97	0.35
4	75.57	75.2	0.37		77.48	77.1	0.38
5	76.89	76.5	0.39		77.93	77.52	0.41
6	76.52	76.03	0.49		76.09	75.81	0.28
7	57.76	57.41	0.35		59.6	59.03	0.57
			Nmu(sucrose/H2O)	saline(sucrose/H2O)
			1.67241	2.42308			P value	0.0036
			1.11905	2.43243			95% confidence interval	0.4843 to 1.958
			0.979592	3.62857			F, DFn, Dfd	1.742, 6, 6
			1.21622	2.71053
			2.41026	2.53659
			1.02041	3.57143
			1.91429	1.57895
		Mean	1.47603	2.69737
		SEM	0.204264	0.269631
		P-TTEST		0.0293
				*

## Sheet: D
H2O			10mM sucrose
before	after		before	after
69.22	68.54	0.68	75.18	73.43	1.75	wt
53.9	53.44	0.46	72.02	70.44	1.58
73.93	73.45	0.48	72.75	70.58	2.17
53.87	53.3	0.57	73.91	72.12	1.79
74.3	73.9	0.4	74.84	73.15	1.69
53.33	52.87	0.46	75.41	73.76	1.65
75.07	74.66	0.41	75.93	73.72	2.21	nmu-KO
54.3	53.84	0.46	73.96	71.17	2.79
75.2	74.76	0.44	75.98	73.95	2.03
54.03	53.59	0.44	72.83	70.83	2
72.77	72.06	0.71	73.41	70.53	2.88
73.55	73.04	0.51	74.16	70.91	3.25
	wt	nmu-KO			P value	0.0073
	2.57353	5.39024			95% confidence interval	0.5356 to 2.652
	3.43478	6.06522			F, DFn, Dfd	1.675, 5, 5
	4.52083	4.61364
	3.14035	4.54545
	4.225	4.05634
	3.58696	6.37255
Mean	3.58024	5.17391
TTEST		0.00728928

## Sheet: I
	saline.nd2	saline001.nd2	saline002.nd2	saline003.nd2	saline004.nd2	saline001.nd2				saline.nd2	saline001.nd2	saline002.nd2	saline003.nd2	saline004.nd2	saline001.nd2						10 mM glucose.nd2	10 mM glucose001.nd2	10 mM glucose002.nd2	10 mM glucose003.nd2	10 mM glucose004.nd2	10 mM glucose005.nd2				10 mM glucose.nd2	10 mM glucose001.nd2	10 mM glucose002.nd2	10 mM glucose003.nd2	10 mM glucose004.nd2	10 mM glucose005.nd2					glucose+ttx-1.tif	glucose+ttx002-1.tif	glucose+ttx003-1.tif	glucose+ttx004-1.tif	ttx.nd2	ttx001.nd2				glucose+ttx-1.tif
time(sec)	raw data	raw data	raw data	raw data	raw data	raw data				F/F0	F/F0	F/F0	F/F0	F/F0	F/F0	mean	SEM				raw data	raw data	raw data	raw data	raw data	raw data				F/F0	F/F0	F/F0	F/F0	F/F0	F/F0	SEM				raw data	raw data	raw data	raw data	raw data	raw data				F/F0
0	62.6361	53.8392	63.4717	72.7256	128.589	83.1027				0.0160473	0.0637012	0.00425782	-0.0561286	-0.0551091	0.0354116	0.00136338	0.0198021				389.132	330.981	281.758	352.456	690.768	818.368				0.0449513	0.080036	0.0827505	-0.00741115	0.0261487	-0.0835191	0.0169624				307.823	388.981	258.707	838.146	201.896	454.477				0.00127438
3	61.99	53.0685	63.0221	74.4584	134.007	81.8894				0.00556663	0.0484745	-0.00285582	-0.0336394	-0.0152916	0.0202946	0.00375816	0.011664				325.289	318.415	241.65	380.588	661.829	973.912				-0.126487	0.0390315	-0.071379	0.0718152	-0.0168407	0.0906726	0.0359868				288.19	425.114	322.891	743.683	205.956	456.264				-0.0625868
6	62.7553	52.6423	61.7041	79.1694	129.716	81.1856				0.0179809	0.0400541	-0.0237094	0.0275025	-0.046827	0.0115257	0.00442112	0.0134839				410.553	279.019	258.183	359.647	619.634	963.386				0.102474	-0.0895237	-0.0078443	0.0128408	-0.0795223	0.0788844	0.0348621				313.734	412.543	304.946	956.634	206.414	484.791				0.0205028
9	62.8717	52.4548	60.9051	74.7557	138.774	79.8255				0.0198691	0.0363496	-0.0363513	-0.0297809	0.0197319	-0.00542041	0.000733014	0.0120276				387.526	316.755	220.608	397.279	631.207	913.175				0.0406405	0.0336133	-0.152239	0.118821	-0.0623302	0.0226541	0.0468344				331.57	409.39	319.25	869.927	207.426	403.654				0.0785171
12	61.719	46.4014	62.8623	77.3052	140.385	81.824				0.00117062	-0.0832474	-0.00538419	0.0033079	0.0315713	0.0194797	-0.00551701	0.0164975				384.816	313.302	263.017	316.632	656.232	861.035				0.0333619	0.0223464	0.0107297	-0.108298	-0.025156	-0.0357372	0.0256812				297.152	378.924	282.576	1016.49	207.545	437.186				-0.0334355
15	60.0433	51.8386	62.2029	77.329	139.254	76.054				-0.0260116	0.0241754	-0.0158173	0.00361679	0.023262	-0.0524111	-0.00719765	0.0122495				362.211	295.396	301.558	345.838	699.171	947.158				-0.0273411	-0.0360823	0.158839	-0.026048	0.0386307	0.0607107	0.0368221				302.949	446.962	271.054	884.195	211.891	474.509				-0.0145776
18	61.654	51.4827	58.556	76.5354	130.064	85.1468				0.000116227	0.0171438	-0.0735191	-0.00668297	-0.044272	0.0608799	-0.00772234	0.0191939				352.368	349.642	260.225	337.662	647.878	902.684				-0.0537705	0.140927	1.61399e-06	-0.0490744	-0.0375654	0.0109051	0.0364494				254.709	426.705	272	796.341	214.928	479.596				-0.171493
21	60.8768	48.967	65.6394	78.8937	126.555	80.7175				-0.0124911	-0.0325588	0.0385555	0.0239243	-0.070053	0.0056934	-0.00782163	0.0161738				350.132	328.585	252.517	397.529	658.878	896.404				-0.0597771	0.0722169	-0.0296201	0.119525	-0.0212247	0.00387146	0.0339754				362.165	375.648	283.783	913.463	213.824	451.418				0.178035
24	62.4841	48.2305	65.2489	75.547	132.497	78.2806				0.0135816	-0.0471099	0.0323769	-0.0195109	-0.0263895	-0.024669	-0.0119535	0.0119449				311.974	322.075	226.683	344.044	679.012	905.246				-0.162244	0.0509758	-0.128894	-0.0311005	0.00868484	0.0137736	0.0404898				307.114	401.248	260.25	901.341	218.662	462.705				-0.0010315
27	62.0503	49.5785	60.5913	72.6721	140.475	77.0882				0.00654478	-0.0204774	-0.0413163	-0.0568229	0.0322312	-0.0395256	-0.0198944	0.0136924				413.658	279	253.892	358.632	699.585	867.596				0.110813	-0.0895853	-0.0243362	0.00998316	0.0392467	-0.0283891	0.0332504				297.127	440.886	233.957	796.488	215.36	451.068				-0.0335178
30	57.9053	50.4604	65.8402	77.0279	137.536	79.6399				-0.0606931	-0.00305374	0.0417325	-0.000291044	0.0106401	-0.00773288	-0.00323302	0.0135953				284.974	274.377	252.583	380.676	645.939	966.368				-0.234748	-0.10467	-0.0293642	0.0720639	-0.040446	0.0822243	0.0505064				339.81	477.781	305.989	830.659	209.127	485.582				0.105321
33	61.5952	50.4981	65.0354	79.1342	141.149	81.1156				-0.000837594	-0.0023089	0.0289989	0.0270456	0.037189	0.0106535	0.0167901	0.00679095				308.579	372.226	285.2	354.324	639.72	814.895				-0.17136	0.214625	0.0959764	-0.0021516	-0.0496852	-0.0874093	0.065416				278.721	433.324	294.435	778.634	209.918	488.336				-0.0933852
36	64.719	48.6624	63.8178	80.8341	130.763	79.7023				0.0498349	-0.0385768	0.00973386	0.0491078	-0.0391356	-0.00695541	0.00400146	0.016291				370.632	305.642	279.425	319.75	735.488	937.298				-0.00472756	-0.00265053	0.073784	-0.0995177	0.0925804	0.0496689	0.0340889				311.709	482.733	260.717	927.439	214.145	485.145				0.0139149
39	60.7297	52.1448	61.385	78.9711	131.538	80.089				-0.0148772	0.030225	-0.0287582	0.0249288	-0.0334357	-0.00213735	-0.00400912	0.0109688				400.289	282.264	267.625	324.397	671.024	802.649				0.074914	-0.0789338	0.0284386	-0.0864305	-0.00318118	-0.101123	0.0310498				338.177	416.324	312.37	828.439	219.026	430.877				0.10001
42	64.0915	48.7403	63.5397	75.9184	137.421	77.6726				0.039656	-0.0370378	0.00533372	-0.0146907	0.00978841	-0.0322443	-0.00486578	0.0118069				398.553	339.887	254.267	399.779	676.524	817.333				0.0702499	0.109097	-0.0228951	0.125862	0.00498916	-0.0846783	0.0289127				318.532	428.99	298.913	926.024	208.487	501.082				0.0361076
45	58.5074	49.2842	65.1319	81.8757	140.912	77.9118				-0.0509261	-0.0262919	0.0305257	0.0626263	0.0354452	-0.029264	0.00368586	0.0184118				353.684	328.717	234.85	350.897	659.695	952.14				-0.0502371	0.0726479	-0.0975103	-0.011801	-0.0200111	0.0662905	0.0278957				310.582	445.61	299.37	908.732	212.461	499.009				0.0102504
48	61.8732	50.3282	64.1778	79.6309	145.449	83.0323				0.00367196	-0.00566562	0.0154298	0.0334921	0.0687794	0.0345345	0.0250404	0.0109034				422.342	277.792	254.233	376.721	689.561	851.982				0.134133	-0.0935259	-0.0230235	0.0609233	0.0243553	-0.0458751	0.038378				304.532	407.229	257.543	851.854	218.275	446.491				-0.00943111
51	61.6124	51.5543	60.5406	75.6914	143.445	81.7913				-0.000558585	0.0185584	-0.0421184	-0.0176368	0.0540559	0.0190723	0.0052288	0.0136033				391.289	271	246.55	325.441	723.963	856.07				0.050746	-0.11569	-0.0525491	-0.0834901	0.0754607	-0.0412973	0.037573				306.911	439.99	272.163	876.341	211.105	422.168				-0.00169018
54	61.4841	52.6636	64.4537	74.2431	130.058	77.0954				-0.00263979	0.0404749	0.0197952	-0.0364337	-0.0443139	-0.0394359	-0.0104255	0.014412				415.526	297.962	278.192	342.088	684.878	891.386				0.11583	-0.0277091	0.0690447	-0.0366087	0.0173987	-0.00174757	0.0289725				272.937	425.848	327.989	868.854	216.948	484.032				-0.112202
57	61.3383	49.4595	65.926	78.2882	143.183	82.0464				-0.00500488	-0.0228285	0.0430901	0.0160658	0.0521329	0.0222507	0.0176177	0.0115639				414.316	246.038	291.475	337.368	692.329	919.842				0.112579	-0.197146	0.12009	-0.0499029	0.0284676	0.0301201	0.0588316				304.177	376.791	277.533	931.463	211.686	429.3				-0.0105839
60	61.8103	47.6913	64.1215	77.1615	138.533	86.4487				0.00265164	-0.0577629	0.014539	0.00144289	0.0179603	0.0771008	0.00932197	0.0176094				365.737	320.491	299.642	348.838	645.268	968				-0.0178718	0.0458041	0.151473	-0.0175993	-0.0414423	0.0840515	0.0349938				340.24	406.819	319.674	842.78	221.769	485.427				0.106721
63	63.032	46.283	66.3728	73.9808	152.684	82.943				0.0224694	-0.0855866	0.0501594	-0.0398379	0.121947	0.0334218	0.0170955	0.0295339				315.842	347.868	307.975	363.647	637.122	980.684				-0.151856	0.13514	0.183497	0.0241056	-0.053544	0.0982564	0.0611022				287.304	377.638	224.717	829.195	214.093	482.205				-0.065469
66	61.475	50.9987	62.4051	77.8881	146.964	78.4681				-0.00278741	0.00758145	-0.0126181	0.0108731	0.0799185	-0.0223328	0.0101058	0.01485				361.079	297.868	302.708	355.5	731.939	971.228				-0.0303798	-0.0280168	0.163258	0.00116167	0.0873085	0.0876666	0.0377556				313.785	413.057	295.283	855.317	211.621	467.627				0.0206674
69	61.9891	47.147	63.3335	77.4176	145.088	80.0255				0.00555203	-0.0685166	0.0020712	0.00476669	0.0661282	-0.00292852	0.00117883	0.0174409				381.395	382.547	281.217	327.309	690.817	1000.88				0.024175	0.248303	0.0806692	-0.0782306	0.0262212	0.12087	0.0535804				332.24	406.962	307.076	1139.34	215.622	497.291				0.0806994
72	64.9738	51.9092	64.0356	81.5938	146.254	78.7935				0.0539681	0.0255702	0.0131799	0.0589676	0.0746991	-0.0182785	0.0346844	0.0140396				426.368	315.434	249.625	356.529	699	1040.75				0.144945	0.0293037	-0.0407324	0.00406068	0.0383771	0.165528	0.0306791				329.43	376.571	286.12	1146	220.533	488.236				0.0715588
75	59.6538	54.5534	64.6068	79.5131	161.74	77.5038				-0.0323299	0.0778117	0.0222175	0.0319632	0.188493	-0.0343474	0.0423013	0.0339549				474.289	318.038	270.567	319.75	678.341	987.035				0.273629	0.0378003	0.0397431	-0.0995177	0.0076885	0.105369	0.0609887				275	402.924	298.609	1140.41	224.015	494.864				-0.10549
78	62.3959	47.6329	63.8867	79.694	153.779	78.243				0.0121509	-0.0589167	0.010824	0.034311	0.129995	-0.0251374	0.0172045	0.0262475				523	310.264	290.558	355.471	690.22	1038.21				0.404434	0.012434	0.116567	0.00107887	0.0253335	0.16268	0.0759165				211.506	422.105	256.391	1035.66	224.301	474.918				-0.31202
81	59.4681	51.9642	65.2808	75.743	146.411	78.8646				-0.0353422	0.0266568	0.0328816	-0.0169672	0.0758528	-0.0173927	0.0109482	0.0169958				505.579	367.623	312.575	375.588	715.805	999.491				0.357652	0.199602	0.201174	0.0577342	0.0633411	0.119318	0.0551666				251.24	439.39	248.315	918.61	221.287	485.368				-0.182774
84	61.7463	52.1234	64.5662	84.0687	140.458	80.581				0.00161346	0.0298022	0.0215751	0.0910882	0.032107	0.00399268	0.0300298	0.0132783				477.079	374.094	266.375	400.926	775.695	966.702				0.28112	0.22072	0.023635	0.129092	0.152309	0.0825977	0.0435645				266.139	405.238	333.87	1077.37	226.194	480.768				-0.134312
87	60.4581	51.6928	64.3175	79.2282	159.757	76.5643				-0.019283	0.0212948	0.0176402	0.0282656	0.17392	-0.0460531	0.0292974	0.0311739				472	333.453	261.875	359.147	755.049	1094.21				0.267481	0.0881015	0.00634229	0.0114327	0.121639	0.225393	0.0475766				340.646	474.562	405.793	910.195	217.374	455.505				0.108039
90	61.696	49.0101	66.4394	77.2683	145.501	78.7506				0.000797527	-0.0317073	0.0512132	0.002829	0.0691637	-0.018813	0.0122472	0.0162012				521.237	372.038	334.208	386.441	686.122	1083.19				0.399699	0.21401	0.284307	0.0882985	0.0192464	0.213055	0.0679435				343.354	430.457	328.761	830.195	230.646	469.064				0.11685
93	60.7971	48.0028	64.3918	83.8726	150.804	77.3589				-0.0137839	-0.0516086	0.0188158	0.0885431	0.10813	-0.0361528	0.0189905	0.0270077				399.105	325.075	282.467	406.324	801.195	1019.95				0.0717341	0.0607652	0.0854728	0.144291	0.19019	0.142227	0.0245917				264.202	386.286	310.685	943.049	235.25	492.009				-0.140612
96	59.3564	49.6599	65.4868	80.4241	152.329	83.4437				-0.0371541	-0.0188692	0.036141	0.0437866	0.119338	0.0396603	0.0304837	0.0225084				568.711	373.245	294.133	370.015	741.012	1004.39				0.527182	0.21795	0.130306	0.0420381	0.100787	0.1248	0.0857193				247.557	400.81	307.467	909.854	233.329	460.714				-0.194756
99	58.1106	47.1087	65.7293	78.9648	147.127	74.3034				-0.0573628	-0.0692733	0.0399779	0.0248471	0.0811133	-0.0742226	-0.0091534	0.0270127				393.553	382.623	360.342	378.765	792.597	1015.16				0.0568232	0.24855	0.384734	0.0666799	0.177418	0.136863	0.0609924				309.734	440.514	345.989	1032.71	233.484	486.85				0.00749171
102	63.0492	53.2506	65.1253	81.4371	147.581	83.2741				0.0227484	0.0520722	0.0304213	0.0569339	0.0844508	0.0375472	0.0473623	0.00908944				555.763	408.226	291.508	390.132	724.732	1015.54				0.492414	0.332098	0.120218	0.0986937	0.076602	0.137295	0.0812188				275.911	444.943	297.576	940.195	235.737	452.582				-0.102526
105	60.5223	48.7425	65.4836	79.2409	126.409	83.3875				-0.0182416	-0.0369943	0.0360904	0.0284304	-0.0711244	0.0389601	-0.00381323	0.0185306				486.921	317.547	278.742	387.779	831.195	991.333				0.307549	0.0361994	0.0711582	0.0920672	0.234755	0.110182	0.0522084				285.38	433.229	288.033	1209.05	236.428	481.6				-0.0717274
108	61.0162	48.1479	61.9055	85.8996	137.271	80.1468				-0.0102298	-0.0487418	-0.0205228	0.114851	0.00868912	-0.0014172	0.00710468	0.0229978				530.342	387.491	335.567	394.485	786.146	1190.42				0.42415	0.264434	0.289527	0.110952	0.167835	0.333138	0.0539327				325.57	407.619	347.076	1226.98	231.539	505.859				0.0590005
111	61.5984	47.9253	66.3607	81.7311	145.447	81.6103				-0.000785685	-0.0531397	0.049968	0.0607496	0.0687655	0.0168172	0.0237291	0.0188369				588.526	408.151	300.117	362.603	779.976	1030.51				0.580394	0.331851	0.153299	0.0211649	0.158668	0.154054	0.0964142				256.202	404.457	348.283	1208.9	231.503	512.286				-0.166634
114	58.721	49.6715	64.1535	86.9874	144.596	82.1536				-0.0474612	-0.01864	0.0150453	0.128969	0.0625166	0.0235864	0.0273359	0.0254561				518.421	306.83	295.45	362.059	847.463	1180.77				0.392138	0.00122836	0.135365	0.0196326	0.258922	0.322332	0.0738854				282	490.543	381.837	1168.32	257.348	471.341				-0.082721
117	61.2846	48.5192	68.1437	84.3425	154.882	81.9681				-0.00587597	-0.041406	0.0781788	0.0946417	0.138099	0.0212751	0.0474855	0.0275758				453.974	438.698	317.55	400.015	918.207	971.649				0.219074	0.431531	0.220292	0.126524	0.364013	0.0881381	0.0550247				254.873	457.429	368.043	1058.05	238.682	464.695				-0.170957
120	63.1514	50.1919	65.0834	83.0901	140.306	81.3148				0.0244062	-0.0083585	0.0297584	0.0783874	0.0309945	0.0131354	0.0280539	0.0117001				448	372.585	318.883	373.647	878.024	1064.33				0.203033	0.215795	0.225416	0.0522677	0.304321	0.191934	0.0409953				322.114	494.848	401.63	943.122	239.07	491.455				0.0477599
123	56.7171	48.5826	64.3651	82.3437	139.65	81.9582				-0.0799674	-0.0401534	0.0183933	0.0687002	0.0261741	0.0211518	0.0023831	0.0217283				460.632	420.377	354.133	394.632	862.439	1117.3				0.236953	0.371748	0.360876	0.111367	0.281169	0.251249	0.0474147				326.962	460.743	424.446	1042.59	242.582	518.118				0.0635297
126	59.88	50.5009	66.911	80.7488	156.43	80.6935				-0.0286606	-0.00225358	0.0586749	0.0480008	0.149472	0.00539437	0.0384379	0.0258711				540.368	388.208	317.733	341.132	927.756	1080.28				0.451074	0.266774	0.220996	-0.0393005	0.378198	0.209793	0.0841216				250.342	497.571	365.152	1057.54	244.533	514.491				-0.185698
129	59.4364	49.0883	68.4407	84.0793	163.208	82.927				-0.0358564	-0.0301623	0.082878	0.0912258	0.199275	0.0332225	0.0567637	0.0359943				480.474	416.358	333.45	360.426	867.146	1087.91				0.290236	0.358634	0.281393	0.0150357	0.288162	0.21834	0.0595884				252.721	484.324	376.087	1283.68	247.465	476.195				-0.177957
132	60.3893	47.5035	68.4464	84.9057	148.183	82.5011				-0.020399	-0.0614732	0.0829682	0.101951	0.0888737	0.027916	0.0366395	0.0271391				465.763	440.302	334.633	392.044	910.439	1065				0.250733	0.436765	0.28594	0.104077	0.352474	0.192681	0.0554474				255.696	474.771	394.543	1138.1	248.089	535.114				-0.168281
135	61.3545	48.8357	65.9919	83.2058	153.946	80.3795				-0.00474209	-0.0351529	0.0441328	0.079889	0.131218	0.00148211	0.0361378	0.0251482				594.211	368.755	326.833	319.912	899.11	1055.96				0.595658	0.203296	0.255966	-0.0990621	0.335644	0.182562	0.111922				265.633	500.067	287.37	1282.76	243.605	546				-0.135959
138	61.8442	51.5135	65.9112	80.3861	149.187	83.0167				0.00320154	0.0177524	0.0428559	0.0432935	0.0962491	0.0343401	0.0396154	0.0129913				574.132	405.283	332.3	374.662	987.915	1147.88				0.541739	0.322493	0.276974	0.0551253	0.467565	0.285494	0.084304				263.367	537.019	381.348	1300.73	243.922	515.077				-0.143329
141	59.8973	51.5883	69.2613	82.0449	142.699	84.0506				-0.02838	0.0192302	0.0958616	0.0648222	0.0485757	0.0472219	0.0412219	0.0172826				406.921	426.415	358.317	439.971	899.854	1101.81				0.0927221	0.39145	0.376952	0.239048	0.336749	0.2339	0.0554611				289.557	444.429	328.272	1199.02	242.552	515.346				-0.0581399
144	62.2705	50.2271	67.277	78.3956	156.336	77.5179				0.0101167	-0.00766305	0.0644658	0.0174597	0.148785	-0.0341718	0.0331654	0.0266625				486.579	418.774	352.583	368.941	932.841	1145.65				0.306631	0.366515	0.354919	0.0390149	0.385753	0.282999	0.0642285				249.076	484.438	414.946	1178.83	241.438	533.441				-0.189815
147	60.42	47.3926	65.9318	80.488	149.183	82.9084				-0.019901	-0.0636643	0.0431819	0.044616	0.0962219	0.0329907	0.0222409	0.0228645				505.026	410.189	341.333	406.368	903.988	991.14				0.356168	0.338501	0.311687	0.144415	0.34289	0.109966	0.0392504				316.76	537.943	419.717	1178.49	255.471	497.25				0.0303433
150	61.4191	50.0697	67.8668	78.6229	145.888	76.1099				-0.00369419	-0.0107728	0.0737977	0.0204097	0.0720067	-0.0517146	0.0166721	0.0201527				477.789	387.981	351.367	333.456	939.049	1029.61				0.283028	0.266035	0.350244	-0.0609191	0.394974	0.153052	0.0803211				242.658	482.914	409.467	1137.24	250.795	536.786				-0.210691
153	60.4509	53.2192	68.4853	81.0987	155.979	78.4696				-0.0193998	0.0514519	0.0835837	0.052542	0.146161	-0.0223141	0.0486708	0.0260886				563.026	537.774	357.8	326.662	893.317	1123.81				0.511918	0.754828	0.374966	-0.0800527	0.327039	0.258538	0.136446				244.949	533.457	463.891	1188.66	253.726	510.086				-0.203238
156	62.993	45.4626	69.421	82.5593	159.535	82.0471				0.0218367	-0.101795	0.0983884	0.0714984	0.172286	0.0222594	0.0474122	0.0375596				597.342	415.434	389.167	381.691	993.134	1097.82				0.604068	0.355617	0.495503	0.0749215	0.475319	0.229441	0.0905752				268.823	505.514	404.62	1080.63	257.589	524.077				-0.125583
159	61.6152	49.9623	68.341	84.3	162.372	81.3532				-0.000513165	-0.0128947	0.0813005	0.0940901	0.193135	0.0136138	0.0614553	0.0318618				437.289	454.302	326.425	398.632	1023.23	1121.95				0.174272	0.482448	0.254397	0.122631	0.520029	0.256455	0.0807678				307.937	502.2	415.565	1260.41	246.626	497.223				0.00164487
162	62.446	52.4268	68.742	80.4782	146.806	83.919				0.0129636	0.0357964	0.0876452	0.0444888	0.0787509	0.0455822	0.0508712	0.0113469				535.763	369.811	397.3	424.5	1009.52	1038.98				0.438707	0.206744	0.526758	0.19548	0.499667	0.163544	0.0718181				329.43	548.781	412.196	1249.8	254.27	508.305				0.0715588
165	62.4214	47.3876	66.6884	88.674	168.293	85.3076				0.0125646	-0.0637631	0.0551529	0.150858	0.236647	0.0628834	0.0757239	0.0430408				469.974	436.34	335.533	377.294	986.793	991.281				0.26204	0.423835	0.289399	0.0625384	0.465898	0.110123	0.0709915				327.975	522.39	360.457	1356	252.442	531.041				0.0668237
168	59.4483	49.017	68.5911	81.1801	165.353	77.9217				-0.0356634	-0.031571	0.0852577	0.0535984	0.215042	-0.0291407	0.0429206	0.0401869				449.211	398.321	361.192	377.632	1039.83	1027.67				0.206284	0.299774	0.388	0.0634911	0.544685	0.150871	0.0813428				291.329	519.562	424.283	1250.71	260.778	495.518				-0.0523757
171	60.8269	49.7575	68.0284	81.4892	164.922	78.7958				-0.0133005	-0.0169409	0.0763545	0.0576101	0.211869	-0.0182499	0.0495571	0.03656				392.316	510.302	355.05	389.882	1052.91	1134				0.0535019	0.665184	0.364398	0.0979896	0.564124	0.269953	0.121822				292.177	554.505	428.163	1335.95	253.22	546.727				-0.049617
174	61.9968	47.5958	67.9333	83.3843	160.131	81.6441				0.00567693	-0.0596497	0.0748499	0.0822057	0.176667	0.0172383	0.0494979	0.0330447				462.763	441.453	385.458	374.632	1009.5	1032.96				0.242677	0.44052	0.481252	0.0550425	0.49963	0.156805	0.0854803				353.747	483.19	440.489	1140.49	262.453	520.404				0.150654
177	64.1902	50.4852	70.1701	82.3459	158.488	83.0342				0.041257	-0.00256377	0.110241	0.0687288	0.164594	0.0345581	0.0694692	0.0244371				460.289	423.283	331.242	407.191	1014.63	1016.02				0.236035	0.38123	0.272907	0.146735	0.507257	0.137826	0.0622413				286.683	570.771	474.674	1255.59	267.448	545.904				-0.0674867
180	64.1281	48.826	70.2033	85.6325	155.744	79.3772				0.0402497	-0.0353446	0.110766	0.111384	0.144431	-0.011006	0.06008	0.0299269				490.658	444.245	397.725	439.441	1024.88	1070.25				0.317584	0.449632	0.528391	0.237557	0.522475	0.198555	0.0576665				261.038	514.638	481.12	1097.34	262.395	519.236				-0.150905
183	61.0723	47.9604	70.2773	84.2747	150.974	82.6217				-0.00931978	-0.0524462	0.111937	0.0937618	0.109379	0.0294186	0.0471218	0.0280863				481.974	445.66	372.508	451.324	1087.6	1166.07				0.294264	0.45425	0.431488	0.271021	0.615646	0.305868	0.062195				321.937	502.524	464.043	1166.63	260.409	467.509				0.0471835
186	64.8744	49.5232	67.1081	82.276	177.052	79.6251				0.0523557	-0.02157	0.0617934	0.0678216	0.301008	-0.00791728	0.075582	0.0476157				390.158	491.113	391.633	395.456	1070.34	1153.6				0.0477072	0.602569	0.504982	0.113686	0.590011	0.291899	0.120471				255.658	517.01	408.87	1141.93	266.285	492.441				-0.168405
189	62.3652	50.4048	71.4002	83.15	161.189	80.3578				0.0116529	-0.00415223	0.129704	0.0791648	0.184441	0.00121174	0.0670036	0.0317942				546.868	458.151	355.683	416.721	1146.28	1079.51				0.468528	0.495008	0.366832	0.173572	0.70282	0.208929	0.0863837				243.481	496.667	511.511	1140.41	256.907	562.223				-0.208014
192	65.2049	48.043	71.9066	81.1892	164.875	86.5928				0.0577169	-0.0508143	0.137716	0.0537165	0.211526	0.0788962	0.0814596	0.0360178				507.263	427.736	358.85	401.279	1014.99	1011.67				0.362175	0.39576	0.379001	0.130086	0.507783	0.132953	0.0617324				313.823	519.638	395.554	1153.85	270.495	487.455				0.020791
195	64.0761	50.7993	70.4645	81.971	165.473	81.9137				0.0394062	0.00364191	0.114899	0.0638631	0.215921	0.0205974	0.0763881	0.0320841				538.158	405.377	345.533	403.044	1017.38	1058.14				0.445138	0.322801	0.327827	0.135056	0.511333	0.184999	0.0642261				294.772	540.829	450.62	1317.98	268.506	526.091				-0.0411761
198	62.3289	51.0085	72.1743	85.172	172.6	80.2624				0.0110641	0.00777507	0.141952	0.105407	0.268292	2.31122e-05	0.0890856	0.0431305				459.316	426.849	416.725	367.103	1042.05	1072.18				0.23342	0.392866	0.601405	0.0338378	0.547982	0.200716	0.104183				297.519	508.876	466.478	1331.22	271.098	512.795				-0.0322414
201	63.8052	46.2208	69.5629	81.3599	163.432	78.9433				0.0350118	-0.0868155	0.100634	0.055932	0.200923	-0.0164121	0.0482121	0.0402952				541.605	455.642	392.675	384.294	1133.89	1016.53				0.454395	0.48682	0.508985	0.0822518	0.684414	0.138396	0.0986974				281.582	616.495	513.478	1210.41	270.917	513.955				-0.0840797
204	67.2147	51.538	69.6623	84.2606	160.379	78.3525				0.0903187	0.0182364	0.102206	0.0935788	0.178493	-0.0237731	0.0765101	0.0288649				470.316	462.83	404.042	331.647	1157.3	966.947				0.262959	0.510277	0.552665	-0.066013	0.719197	0.0828727	0.136604				264.911	519.105	581.652	1237.78	267.928	483.773				-0.138306
207	65.4231	49.7585	69.331	80.454	158.561	81.4217				0.0612564	-0.0169212	0.0969645	0.0441747	0.165129	0.0144673	0.0608452	0.0262401				454.289	467.377	427.675	423.588	1165.37	1086.95				0.219922	0.525115	0.643484	0.192912	0.731172	0.217259	0.109632				328.089	520.514	529.25	1098.61	273.976	538.341				0.0671942
210	65.2618	53.0606	69.065	85.6992	160.118	86.0156				0.0586399	0.0483184	0.0927558	0.11225	0.176571	0.0717047	0.0933732	0.019135				528.237	485.887	364.808	361.868	1153.71	1167.65				0.418496	0.585514	0.401898	0.0190942	0.713853	0.307636	0.117153				315.24	555.362	510.217	1092.95	272.668	509.05				0.0254024
213	61.0143	50.9796	69.0018	81.4639	163.981	78.6878				-0.0102606	0.00720409	0.0917558	0.0572817	0.204961	-0.0195955	0.0552244	0.0346179				494.237	405.208	380.525	335.632	1068.54	1125.82				0.327195	0.322247	0.462295	-0.0547896	0.58733	0.260797	0.107667				339.177	522.876	498.674	1229.02	271.955	523.164				0.103263
216	65.6525	51.1234	70.0387	80.1257	167.105	79.9475				0.0649776	0.0100452	0.108162	0.0399138	0.227912	-0.00390036	0.0745183	0.0347641				507.816	439.208	322.592	426.706	1110.48	1118.11				0.363659	0.433194	0.239667	0.201692	0.649631	0.252153	0.0797669				338.38	576.533	563.913	1071.76	270.608	521.986				0.100669
219	65.0874	49.5524	67.9749	85.7386	163.856	81.1559				0.0558109	-0.0209931	0.0755081	0.112761	0.204041	0.0111556	0.0730472	0.0325135				503.711	496.679	402.625	390.147	1205.87	1121.86				0.352635	0.620732	0.547221	0.0987351	0.791335	0.256357	0.118915				289.177	524.419	550.402	1243.39	267.276	514.223				-0.0593753
222	69.0763	49.7362	67.7829	81.554	159.219	78.2878				0.120517	-0.0173618	0.0724702	0.0584511	0.169964	-0.0245793	0.0632435	0.0310847				443.711	475.509	397.308	379.971	1123.1	971.474				0.191514	0.551651	0.52679	0.070076	0.668382	0.0879417	0.114762				300.266	497.791	512.87	1444.68	277.681	524.173				-0.0233067
225	61.4087	51.3913	69.5297	82.7826	162.792	88.1582				-0.00386289	0.0153381	0.100108	0.0743965	0.196225	0.0984002	0.0801009	0.0291529				493.947	470.981	340.733	409.191	1100.5	1138.14				0.326417	0.536875	0.309382	0.152367	0.634813	0.27459	0.0861677				316.228	553.657	441.761	1114.49	264.824	565.668				0.0286139
228	68.4112	48.892	69.7257	82.72	168.774	80.3034				0.109728	-0.0340406	0.103209	0.0735841	0.240177	0.000533949	0.0821985	0.0393325				456.105	523.66	392.633	337.647	1125.72	1112.56				0.224799	0.708775	0.508825	-0.0491158	0.672277	0.245944	0.143677				276.747	598.752	526.587	1240.15	273.723	555.346				-0.0998085
231	65.3451	51.4274	68.2857	83.8521	159.783	89.9091				0.0599912	0.0160513	0.0804256	0.088277	0.174112	0.120215	0.0898455	0.0219479				438.763	473.377	364.458	413.574	1127.76	1159.04				0.178229	0.544694	0.400553	0.164709	0.675302	0.297989	0.100251				328.063	603.619	494.793	1247.71	273.045	558.927				0.0671119
234	64.829	51.4347	69.6562	81.931	160.725	83.7369				0.0516193	0.0161955	0.10211	0.063344	0.181034	0.0433134	0.0762694	0.0238838				516.395	416.66	363.475	414.015	1146.41	1113.28				0.386696	0.359619	0.396774	0.165951	0.70302	0.24675	0.0861361				342.468	584.467	554.696	1230.61	263.455	519.359				0.113968
237	67.4867	49.2641	68.2619	81.157	150.578	83.9				0.094731	-0.026689	0.080049	0.0532986	0.106468	0.0453455	0.0588672	0.0196082				539.395	536.887	412.158	393.191	1073.21	1076.86				0.448459	0.751934	0.583856	0.107308	0.594269	0.205962	0.108677				269.835	545.743	561	1270.22	279.971	544.995				-0.12229
240	68.4483	53.6734	69.4031	81.3331	172.088	85.7916				0.11033	0.0604255	0.0981052	0.0555841	0.264529	0.0689137	0.109648	0.0322111				441.132	522.434	388.7	469.029	1211.77	1128.16				0.184589	0.704773	0.49371	0.320884	0.800104	0.26341	0.114804				259.949	619.857	659.152	1037.51	266.982	567.323				-0.154446
243	68.5391	47.0411	65.0878	80.6952	165.826	79.4874				0.111802	-0.0706089	0.029828	0.0473051	0.218517	-0.00963294	0.0545352	0.0410735				500.553	462.17	378.65	432.103	1163.51	1082.07				0.344155	0.508122	0.455089	0.216891	0.728418	0.211797	0.0855752				314.152	591.981	537.467	1049.66	280.983	585.555				0.0218614
246	66.4792	51.7057	69.5857	78.777	167.675	81.9966				0.0783879	0.0215497	0.100994	0.0224097	0.232101	0.0216302	0.0795122	0.0335245				424	523.245	379.142	437.544	1244.46	1129.35				0.138585	0.70742	0.456979	0.232215	0.848673	0.264746	0.135292				300.557	598.943	555.12	1225.29	276.909	536.877				-0.0223595
249	66.9041	51.4315	71.1869	80.0428	147.133	85.149				0.0852804	0.0161323	0.126329	0.0388379	0.0811545	0.0609073	0.0681069	0.0157743				460.368	457.943	414.008	413.176	1255.85	1141.6				0.236246	0.494331	0.590965	0.163591	0.865593	0.27846	0.12654				262.608	645.924	557.696	1168.54	280.118	594.682				-0.1458
252	63.6508	51.8194	69.0084	81.5143	160.127	80.2833				0.0325072	0.023796	0.0918602	0.0579358	0.176639	0.000283514	0.063837	0.0259284				487.026	507.585	384.642	385.441	1156.28	1269.23				0.307832	0.656318	0.478114	0.0854823	0.717675	0.421393	0.115777				277.19	609.048	578.5	1188.2	283.666	561.286				-0.0983672
255	67.1857	50.0568	68.0129	81.8054	156.985	79.297				0.0898483	-0.0110277	0.0761093	0.0617139	0.153551	-0.0120052	0.0596982	0.0259064				478.026	565.906	385.692	471.485	1243.95	1175.74				0.283664	0.846626	0.482149	0.3278	0.847912	0.316693	0.122752				330.165	609.724	490.489	1048.63	274.986	568.273				0.0739469
258	64.758	52.2425	70.3495	85.3533	161.88	83.1452				0.0504676	0.0321552	0.113079	0.10776	0.189523	0.0359411	0.0881544	0.0248755				520.895	509.736	417.633	427.985	1175.09	1168.58				0.39878	0.663337	0.604896	0.205295	0.74561	0.308678	0.0980617				288.57	519.029	562.337	1318.73	281.013	573.682				-0.0613517
261	69.7135	51.7067	71.2621	79.3277	168.594	86.7829				0.130853	0.0215694	0.127519	0.029557	0.238858	0.0812648	0.104937	0.0328173				604.842	460.755	397.117	379.868	1165.61	1201.07				0.624208	0.503505	0.526054	0.0697859	0.731534	0.345064	0.112785				335.291	541.657	546.228	1219.24	270.585	572.582				0.0906222
264	65.5587	53.9497	68.5727	81.4123	163.486	87.0327				0.0634561	0.0658844	0.0849665	0.056612	0.201321	0.0843771	0.0927695	0.0222143				532.579	489.264	409.425	425.426	1302.32	1129.86				0.430156	0.596535	0.573353	0.198089	0.934615	0.265316	0.120163				332.43	577.943	473.848	1083.32	274.529	578.555				0.0813171
267	66.1209	50.9856	70.5025	79.2629	142.996	80.8605				0.0725757	0.00732264	0.1155	0.028716	0.0507595	0.00747509	0.0470582	0.0171574				465.921	525.793	361.858	407.338	1216.09	1080.35				0.251157	0.715732	0.390562	0.147149	0.806517	0.209872	0.128795				335.582	584.39	497.348	1083.8	279.014	546.309				0.0915694
270	65.2573	50.0751	68.7919	80.9675	150.293	80.0973				0.0585669	-0.0106661	0.0884347	0.0508392	0.104381	-0.00203394	0.0482536	0.0190422				516.605	498.208	405.858	358.088	1137.8	1080.53				0.387262	0.625719	0.559646	0.00845058	0.69023	0.210068	0.122356				331.152	529.514	479.761	1064.2	277.38	620.995				0.0771584
273	67.0985	49.7924	70.5445	78.5471	167.766	82.5323				0.0884338	-0.0162514	0.116165	0.0194259	0.232774	0.0283048	0.078142	0.0366534				558.789	501.472	379.325	413.279	1178.88	1113.49				0.500541	0.63637	0.457683	0.16388	0.751245	0.246985	0.0991133				414.608	579.848	544.348	1065.29	286.857	542.782				0.34862
276	69.502	50.6768	69.7503	76.2895	158.292	81.6764				0.127422	0.00122167	0.103599	-0.00987439	0.163152	0.0176407	0.0671934	0.0299489				462.684	524.49	408.617	409.441	1104.6	1097.16				0.242465	0.711483	0.570246	0.153071	0.640899	0.228694	0.11171				307.861	512.295	506.935	1271.93	274.783	564.027				0.00139766
279	66.033	52.4548	67.9785	82.0166	174.686	82.5517				0.0711499	0.0363496	0.075565	0.064455	0.28362	0.0285465	0.0932811	0.0388568				616.289	538.264	415.3	393.956	1166.79	1092.11				0.654948	0.756429	0.595929	0.109461	0.733292	0.223035	0.118618				349.101	580.971	474.141	1154.29	280.362	549.564				0.135544
282	66.8695	52.3037	70.3531	79.6707	153.641	79.7894				0.0847191	0.0333643	0.113136	0.0340086	0.128979	-0.00587019	0.0647229	0.0214342				519.816	511.189	373.6	412.588	1140.37	1004.35				0.395883	0.668078	0.435683	0.161934	0.694034	0.12476	0.0977229				372.683	521.333	467.065	1170.15	273.525	608.395				0.212251
285	65.9936	52.5923	69.5192	84.4202	168.237	84.7669				0.0705108	0.0390662	0.0999422	0.0956501	0.236235	0.0561466	0.0995918	0.0289157				410.789	598.038	399.117	444	1115.16	1137.05				0.10311	0.951478	0.533739	0.250396	0.656588	0.273371	0.149885				379.076	583.629	460.826	1177.29	284.365	591.759				0.233044
288	66.9499	48.3367	68.621	79.4751	162.579	84.111				0.0860233	-0.0450117	0.0857307	0.03147	0.194659	0.0479744	0.0668077	0.0322389				540.605	501.679	461.983	435.147	1002.28	1089.16				0.45171	0.637047	0.775325	0.225464	0.488906	0.219735	0.0925148				387.721	576.419	470.033	1061.54	282.682	575.114				0.261166
291	66.4901	48.6407	68.9256	78.2194	166.077	81.9563				0.0785647	-0.0390056	0.0905502	0.0151729	0.220357	0.0211281	0.0644613	0.036604				453.737	512.623	415.375	446.809	1204.8	1109.23				0.218438	0.672757	0.596217	0.258306	0.789759	0.242211	0.114128				434.937	587.39	423.543	1098.12	284.285	588.404				0.414746
294	67.5464	49.6941	68.8312	81.5945	167.185	85.1555				0.0956994	-0.0181935	0.0890565	0.0589767	0.228502	0.0609883	0.0858382	0.0329759				510.632	510.868	424.65	442.059	1095.07	1107.11				0.37122	0.667031	0.63186	0.244929	0.626751	0.239834	0.0844536				382.089	544.381	397.152	1006.17	285.131	592.609				0.242843
297	68.2095	47.9579	69.0764	77.6747	156.856	82.9312				0.106456	-0.0524956	0.0929361	0.00810347	0.152604	0.0332748	0.056813	0.0304522				479.816	496.925	387.533	405.515	1109.07	1043.91				0.288469	0.621532	0.489226	0.142013	0.647548	0.169065	0.0975155				392.291	568.619	438.37	1039.46	283.022	618.218				0.27603
300	70.7809	48.5546	70.5594	80.6849	163.299	86.4091				0.148168	-0.0407066	0.1164	0.0471714	0.199948	0.0766074	0.0912647	0.0342818				509.368	575.698	418.2	380.382	995.805	1195.86				0.367828	0.878581	0.607073	0.0712357	0.479286	0.339229	0.133169				316.696	535.79	442.717	1038.41	293.398	622.941				0.0301374
303	65.7779	52.3763	68.0449	80.0808	161.157	81.3004				0.0670118	0.0347987	0.0766156	0.0393311	0.184207	0.012956	0.0691534	0.0248498				575.026	514	402.792	456.941	1017.37	1197.11				0.544142	0.677251	0.547862	0.286841	0.511315	0.340624	0.0633692				414.582	513.962	441.446	879.903	288.941	597.386				0.348538
306	67.4266	51.8797	68.6298	80.1805	142.09	79.7643				0.0937561	0.0249874	0.08587	0.0406251	0.0440977	-0.00618293	0.0471922	0.0153393				483.079	543.245	441.15	351.809	1069.28	1041.53				0.297232	0.772683	0.695266	-0.00923351	0.588435	0.166393	0.144204				384.873	541.067	483.707	878.341	276.621	561.45				0.251902
309	64.6984	48.6928	69.9435	81.4697	161.032	79.7357				0.0495008	-0.0379762	0.106656	0.057357	0.183287	-0.00653927	0.0587142	0.0324092				533.605	539.151	420.8	460.691	1105.54	1114.11				0.432912	0.759322	0.617065	0.297402	0.642295	0.247673	0.0819594				374.835	518.495	480.38	909.39	286.938	617.191				0.21925
312	68.3899	50.4413	68.5108	81.9529	150.325	83.7084				0.109382	-0.0034311	0.0839871	0.0636282	0.104613	0.0429583	0.0668564	0.017368				534.684	453.943	417.492	469.456	1000.66	1095.51				0.43581	0.481279	0.604352	0.322085	0.486496	0.226847	0.0455069				500.392	540.019	420.065	1241.78	287.775	625.936				0.627658
315	65.2692	52.407	69.3616	79.4926	157.258	84.1681				0.05876	0.0354052	0.0974486	0.0316971	0.155556	0.0486859	0.0712588	0.019415				578.737	560.924	369.858	419.632	980.244	1112.54				0.554106	0.830372	0.421304	0.181772	0.45617	0.245924	0.105077				294.139	519.895	431.837	980.903	289.344	619.645				-0.0432348
318	69.741	48.6501	68.707	84.2811	162.555	85.2183				0.131299	-0.0388198	0.0870914	0.0938448	0.194481	0.0617708	0.0882778	0.0316326				481.868	518.434	396.175	390.838	1075.89	1240.81				0.293981	0.69172	0.522435	0.100681	0.598254	0.389565	0.107622				397.038	487.924	395.652	884.683	285.985	617.432				0.29147
321	66.6824	51.9177	70.8982	81.4735	153.146	82.7943				0.0816841	0.0257381	0.121761	0.0574063	0.12534	0.0315691	0.0739164	0.0176831				503.211	564.17	431.892	397.912	1020.78	1080.54				0.351292	0.840962	0.659688	0.120602	0.516388	0.210088	0.124108				385.646	509.6	418.283	858.097	278.573	615.573				0.254413
324	65.7798	50.8235	68.4803	79.6646	153.022	81.3183				0.0670426	0.00412003	0.0835046	0.0339294	0.124433	0.013179	0.0543681	0.0187597				566.737	522.924	419.833	491.059	957.622	1178.14				0.521882	0.706373	0.61335	0.382923	0.422565	0.319385	0.0597046				379.114	535.248	514.63	811.146	287.322	564.973				0.233167
327	67.7048	48.3339	70.5479	77.6206	157.364	83.0703				0.0982689	-0.045067	0.116218	0.00740133	0.156339	0.0350079	0.0613615	0.0307275				574.342	455.642	420.358	439.824	1047.23	1090.98				0.542305	0.48682	0.615367	0.238634	0.555682	0.221778	0.0655502				407.785	522.381	522.413	896.39	290.781	582.005				0.326427
330	65.8184	49.1159	68.2873	77.6971	152.527	80.9989				0.0676688	-0.029617	0.0804509	0.00839419	0.120793	0.00919948	0.0428149	0.022859				527.737	486.547	400.175	442.147	963.134	1172.67				0.417154	0.587669	0.537806	0.245178	0.430753	0.313255	0.0591044				374.468	563.695	480.359	847.707	288.22	607.668				0.218057
333	66.3728	51.6181	68.9211	83.4901	153.078	83.5114				0.0766619	0.0198189	0.090479	0.0835788	0.124845	0.0405038	0.0726479	0.0152777				510.868	470.925	481.533	414.676	992.232	1119.86				0.371856	0.53669	0.850453	0.167815	0.473978	0.254117	0.111723				378.975	477.076	402.793	750.293	274.63	632.245				0.232715
336	64.0298	52.5675	71.6699	79.3941	164.892	77.2905				0.0386551	0.0385762	0.133971	0.0304188	0.21165	-0.037005	0.0693776	0.0361208				590.316	513.113	374.933	396.779	1011.4	1270.25				0.5852	0.674358	0.440807	0.117413	0.502457	0.422533	0.0951523				410.962	526.771	445.435	897.317	287.051	600.223				0.336762
339	66.5754	52.1636	70.73	82.7343	151.753	83.7141				0.0799484	0.0305964	0.1191	0.0737696	0.115107	0.0430293	0.0769251	0.0147772				596.184	445.415	395.6	398.676	940.634	1119.02				0.600958	0.45345	0.520225	0.122756	0.397329	0.253174	0.0814777				400.228	531.143	355.228	797.171	282.422	627.509				0.301846
342	68.9736	47.7553	71.701	79.6646	154.981	85.3867				0.118851	-0.0564984	0.134463	0.0339294	0.138827	0.0638689	0.0722401	0.0308704				529.289	568.038	402.917	373.235	982.415	1068.89				0.421323	0.853584	0.548342	0.051108	0.459395	0.197042	0.128681				411.165	482.848	413.957	813.561	287.029	633.05				0.337421
345	66.1899	50.3568	69.019	76.367	164.542	81.9027				0.073695	-0.00510057	0.0920279	-0.00886855	0.209082	0.0204603	0.0635493	0.0336191				470.395	510.698	489.008	406.029	902.085	1112.12				0.26317	0.666477	0.879178	0.143463	0.340064	0.245453	0.136318				507.823	527.819	415.652	838.024	288.653	621.882				0.651827
348	67.4609	51.059	70.1555	80.0995	159.871	82.4722				0.0943125	0.0087728	0.11001	0.0395738	0.174758	0.0275559	0.0758304	0.0254546				568.974	505.264	404.825	445.985	1008.72	1105.26				0.527889	0.648745	0.555675	0.255987	0.498471	0.237771	0.0653882				415.38	544.667	389.696	794.732	273.921	636.036				0.351132
351	67.99	52.3295	69.8315	80.3064	151.963	82.643				0.102895	0.0338741	0.104883	0.0422591	0.116645	0.029684	0.0717069	0.0164897				577.921	556.415	442.783	478.794	1028.38	1200.37				0.551916	0.815658	0.701543	0.348383	0.527674	0.344278	0.0797095				425.57	507.81	393.62	758.512	290.368	595.723				0.384277
354	66.1661	48.8367	70.9779	80.4956	155.114	79.5745				0.073309	-0.0351332	0.123022	0.0447146	0.139802	-0.00854772	0.0561945	0.0285267				605.816	469.264	381.808	422.397	863.585	1179.95				0.626822	0.531272	0.467226	0.189558	0.282872	0.321409	0.0804034				408.646	498.162	387.293	778.634	289.892	620.227				0.329227
357	66.8237	50.1928	70.5273	79.4284	163.123	73.0654				0.0839762	-0.00834072	0.115892	0.0308639	0.198657	-0.0896473	0.0552335	0.0411104				658.789	391.057	369.517	421.059	909.707	1183.51				0.769075	0.27607	0.419992	0.185789	0.351387	0.325397	0.100056				395.924	533.733	421.228	797.097	281.587	632.668				0.287847
360	65.1266	48.3992	69.903	81.7169	161.351	82.3209				0.0564468	-0.0437769	0.106015	0.0605653	0.185636	0.0256708	0.0650927	0.0314681				666.079	517.604	402.525	430.368	903.049	1204.61				0.788649	0.689011	0.546837	0.212004	0.341495	0.349033	0.106791				411.76	559.429	407.467	841.951	277.15	604.168				0.339356
363	65.3065	49.0305	70.2435	82.7049	161.095	79.9829				0.059365	-0.0313043	0.111402	0.0733881	0.183754	-0.0034593	0.0655243	0.0317896				717.579	419.132	441.583	477.676	808.207	1119.16				0.926944	0.367685	0.696932	0.345236	0.200606	0.253331	0.132642				401.101	562.124	385.022	878.463	281.593	613.455				0.304687
366	69.1362	46.5791	71.347	81.2632	165.333	76.7027				0.121488	-0.0797366	0.128862	0.0546769	0.214891	-0.0443287	0.0659755	0.0457307				636.079	500.113	384.292	461.426	862.11	1026.14				0.708089	0.631937	0.476769	0.299473	0.280679	0.149162	0.0858594				381.038	547.086	385.87	924.854	292.344	637.891				0.239426
369	70.5717	50.1853	71.4944	78.1948	152.121	84.7837				0.144774	-0.00848889	0.131194	0.0148536	0.117813	0.0563559	0.0760836	0.0263234				565.947	549.396	402.833	468.809	930.085	1033.09				0.519762	0.792754	0.548022	0.320263	0.381659	0.156943	0.0818326				360.683	537.705	332.163	812.927	300.587	608.7				0.173218
372	68.6619	50.1655	70.949	81.8949	157.086	77.7354				0.113794	-0.00888008	0.122565	0.0628755	0.154293	-0.0314618	0.0688643	0.0307386				581.342	392.925	411.592	437.868	869.756	984.281				0.561102	0.282166	0.581679	0.233126	0.292038	0.102284	0.0747833				440.595	481.371	326.935	936.463	287.201	631.082				0.43315
375	69.1765	53.3637	71.2328	78.2259	158.613	83.2308				0.122142	0.0543068	0.127055	0.0152572	0.165514	0.0370077	0.0868805	0.0243029				617.816	453.132	441.725	430.382	943.183	1113.07				0.659046	0.478631	0.697476	0.212046	0.401115	0.246514	0.088575				379.165	482.838	425.228	703.976	285.346	635.85				0.233332
378	67.6116	48.9394	69.3429	79.159	155.333	85.281				0.096757	-0.0331041	0.0971527	0.0273675	0.141409	0.062552	0.0653557	0.0251174				533.263	454.491	415.225	433.926	945.293	1140.47				0.431994	0.483064	0.595641	0.222027	0.404249	0.277203	0.0608846				431.228	480.143	417.283	608.073	291.661	645.509				0.402682
381	63.6284	50.5327	71.2455	79.7012	156.716	78.5198				0.0321438	-0.00162531	0.127256	0.0344045	0.151573	-0.0216887	0.0536773	0.0286188				528.053	454.509	412.467	481.074	905.597	1188.42				0.418002	0.483126	0.585041	0.354803	0.345281	0.330898	0.0444821				348.418	430.267	414.033	727.829	306.148	635.518				0.13332
384	66.2014	50.5726	70.9154	77.7501	163.387	84.5528				0.0738816	-0.000837005	0.122033	0.00908205	0.200593	0.053479	0.0763719	0.0308411				724.316	499.434	422.167	462.779	899.476	1002.63				0.945035	0.629721	0.622317	0.303283	0.336187	0.122835	0.116774				528.747	514.924	351.435	774	282.425	629.295				0.719888
387	67.068	55.4073	71.8904	80.0655	164.08	85.9319				0.0879391	0.0946822	0.13746	0.0391325	0.205689	0.0706618	0.105927	0.023876				548.211	473.472	372.492	400	921.805	1072.56				0.472132	0.545002	0.431424	0.126483	0.369358	0.201149	0.0715362				404.38	500.352	293.989	798.78	294.483	639.795				0.315351
390	66.8548	51.3075	73.3144	77.5212	155.118	85.9338				0.0844807	0.0136824	0.15999	0.00611127	0.13983	0.0706855	0.0791301	0.0257798				689.684	442.453	452.633	453.618	923.415	1312.19				0.852038	0.443783	0.739395	0.277481	0.371749	0.469509	0.110354				491.544	477.467	356.674	786.903	296.582	650.432				0.598877
393	64.1145	48.2189	70.3083	75.9817	161.742	82.6696				0.0400291	-0.0473391	0.112427	-0.0138692	0.188507	0.0300154	0.0516284	0.035175				536.026	358.811	422.125	408.235	846.463	1105.18				0.439414	0.17085	0.622157	0.149675	0.257437	0.237673	0.089559				457.038	511.99	340.239	614.244	305.115	630.223				0.486636
396	66.1541	50.37	72.1861	77.0957	158.828	81.6034				0.0731143	-0.00483977	0.142138	0.000588901	0.167093	0.0167312	0.0658044	0.0304366				546.789	442.792	397.617	432.882	976.829	1240.6				0.468317	0.444891	0.527975	0.219087	0.451097	0.389329	0.0528773				488.861	505.705	319.946	668.488	294.084	617.068				0.590148
399	66.8836	55.4243	73.1032	79.4238	145.791	82.6696				0.0849478	0.095018	0.156649	0.0308042	0.0712925	0.0300154	0.0781211	0.019234				566.816	381.943	437.792	453.853	862.427	1114.89				0.522094	0.246333	0.682361	0.278144	0.281151	0.248557	0.0857911				421.683	485.848	334.511	672.756	287.966	615.777				0.371636
402	67.415	45.8467	72.7269	79.0394	142.716	79.7144				0.0935679	-0.0942066	0.150695	0.0258153	0.0486991	-0.00680465	0.0362943	0.034409				585.342	463.132	440.275	400.029	858.232	1058.75				0.571843	0.511263	0.691904	0.126566	0.274919	0.185686	0.102786				413.202	477.333	324.783	728.39	298.998	624.395				0.344049
405	64.0328	49.38	71.6396	74.4039	156.68	80.1471				0.0387038	-0.0243992	0.133491	-0.0343467	0.151312	-0.00141346	0.0438914	0.0328794				599.263	394.302	404.175	424.882	870.463	1070.04				0.609226	0.28666	0.553178	0.196557	0.293089	0.198319	0.0812874				423.595	469.114	329.598	775.415	297.825	659.555				0.377853
408	64.404	49.6822	71.6221	78.6885	157.497	85.3118				0.0447252	-0.0184286	0.133215	0.0212611	0.157314	0.0629357	0.0668371	0.0273518				517.868	434.038	419.617	371.868	918.829	1184.77				0.390654	0.416324	0.612518	0.0472562	0.364937	0.326812	0.0909696				460.798	435.81	361.489	789.244	301.732	616.514				0.498865
411	66.4379	51.3979	71.1072	76.8212	152.34	82.3551				0.0777179	0.0154684	0.125068	-0.00297371	0.11942	0.0260969	0.0601329	0.0224919				548.237	450.113	422.817	406.103	925.39	1156.6				0.472203	0.46878	0.624815	0.14367	0.374684	0.295258	0.0791882				407.899	502.914	316.489	734.268	288.716	639.936				0.326797
414	70.8393	49.5122	72.0721	83.4307	173.471	84.3308				0.149115	-0.0217873	0.140335	0.0828079	0.274692	0.050713	0.112646	0.0412933				597.263	397.208	422.758	438.118	918.866	1220.88				0.603856	0.296142	0.62459	0.23383	0.364992	0.367246	0.0801799				452.696	497.61	251.109	642.22	297.012	616.677				0.472513
417	69.4882	47.8474	70.4048	77.6239	152.036	90.0323				0.127198	-0.0546788	0.113954	0.00744416	0.117181	0.12175	0.0721415	0.0313785				617.711	385.849	423.717	479.471	855.378	1204.82				0.658764	0.259078	0.628273	0.350289	0.27068	0.349269	0.0873321				419.519	457.81	271.272	608	285.27	615.618				0.364596
420	68.4937	50.0006	73.9181	78.6964	166.424	78.1867				0.111066	-0.012138	0.169542	0.0213636	0.222912	-0.0258389	0.0811512	0.0418443				545.368	400.34	469.058	398.191	955.854	1212.19				0.4645	0.306362	0.802513	0.121389	0.419938	0.35752	0.111878				412.266	422.248	293.75	649.073	294.058	609.682				0.341003
423	71.2415	50.5462	70.6381	78.0239	155.037	80.2475				0.155639	-0.00135859	0.117646	0.0126356	0.139239	-0.000162533	0.0706064	0.0303873				633.342	382.132	418	403.25	888.22	1178.25				0.70074	0.246949	0.606305	0.135636	0.319466	0.319503	0.107886				459.051	522.648	318.587	577.024	286.017	646.823				0.493182
426	64.6753	46.5788	71.414	76.1291	153.665	77.5711				0.049126	-0.0797425	0.129922	-0.0119561	0.129158	-0.0335089	0.0304997	0.0355987				495.974	400.736	431.342	416.632	942.927	1118.4				0.331859	0.307655	0.657575	0.173323	0.400735	0.252487	0.079868				458	456.619	295.946	599	296.85	589.273				0.489765
429	65.9011	50.3442	71.8962	78.9083	149.013	82.7342				0.0690103	-0.0053495	0.137551	0.0241138	0.0949719	0.0308203	0.0585197	0.0213816				439.421	399.113	459.508	402.529	994.939	1026.19				0.179996	0.30236	0.765814	0.133606	0.478	0.149221	0.115081				491.177	444.457	268.37	732.537	298.483	647.882				0.597683
432	62.4715	48.4969	71.374	74.7141	157.705	82.238				0.0133772	-0.0418466	0.129289	-0.0303208	0.158839	0.0246379	0.0423293	0.033986				457.684	435.208	403.442	432.559	888.634	1143.81				0.229038	0.420141	0.55036	0.218175	0.320082	0.280936	0.0624254				485.886	495.724	281.489	675.244	288.698	658.714				0.580472
435	68.3731	47.598	73.215	75.7445	141.426	80.2498				0.10911	-0.0596062	0.158418	-0.0169477	0.0392222	-0.000133876	0.0383436	0.0334456				506.395	375.906	468.692	417.882	956.097	1118.11				0.359843	0.226631	0.801105	0.176843	0.4203	0.252153	0.110163				542.721	451.419	250.674	637.22	286.88	630.195				0.765344
438	65.6374	51.1875	71.3743	78.3511	150.058	79.043				0.0647327	0.0113116	0.129294	0.0168821	0.102649	-0.0151699	0.0516166	0.0231672				536.053	382.981	426.408	397.824	922.403	1100.46				0.439484	0.249719	0.638617	0.120353	0.370246	0.232388	0.0876283				524.886	410.848	282.63	700.512	291.119	625.327				0.707329
441	67.4219	50.1875	73.0719	78.9865	166.336	77.2213				0.0936798	-0.00844543	0.156153	0.0251287	0.222266	-0.0378672	0.0751526	0.0411547				401.158	444.792	392.033	443.912	917.72	1178.33				0.077246	0.451418	0.506519	0.250148	0.363289	0.319601	0.0765735				509.987	455.362	243.109	645.976	301.983	602.818				0.658867
444	65.7977	49.2918	74.0752	79.3877	153.441	84.024				0.067333	-0.0261418	0.172028	0.0303357	0.12751	0.0468905	0.0696591	0.0289102				405.947	418.472	372.392	399.118	973.89	1191.58				0.0901074	0.36553	0.43104	0.123998	0.446732	0.334435	0.0767022				555.392	443.752	257.033	754.951	295.744	637.609				0.806559
447	65.9181	52.2067	70.9634	74.5706	172.413	80.5836				0.069286	0.0314479	0.122793	-0.0321832	0.266919	0.00402508	0.0770479	0.0437976				412.263	405	433.408	462.794	899.037	1205.23				0.107068	0.32157	0.665516	0.303324	0.335535	0.34972	0.0899181				547.367	417.362	296.533	684.756	299.054	609.364				0.780455
450	67.0735	51.9246	73.3467	80.0563	169.32	86.8464				0.0880283	0.0258745	0.160501	0.0390131	0.244187	0.0820559	0.10661	0.0335994				481.579	433.868	371.275	426.765	922.537	964.614				0.293204	0.41577	0.426748	0.201858	0.370445	0.0802596	0.0421031				695.329	436.752	305.63	581.024	294.646	614.045				1.26174
453	67.1597	49.5302	71.3383	74.8847	142.094	85.6836				0.0894266	-0.0214317	0.128724	-0.0281066	0.0441256	0.0675681	0.0467177	0.0253203				420.395	417.396	414.483	423.662	944.988	1136.74				0.128903	0.36202	0.592791	0.193119	0.403796	0.273018	0.0820118				552.177	461.143	222.087	698.756	293.996	623.477				0.796101
456	64.1262	51.8216	74.3853	75.6127	157.557	82.9517				0.0402189	0.0238395	0.176934	-0.0186583	0.157754	0.0335302	0.0689364	0.0323197				423.368	374.377	392.383	415.382	942.561	1144.07				0.136889	0.221644	0.507864	0.169803	0.400191	0.28123	0.0714608				592.367	390.752	241.489	744.61	295.219	602.077				0.926829
459	65.9561	47.3207	71.7367	73.7433	147.391	80.9989				0.0699025	-0.0650848	0.135028	-0.0429203	0.0830503	0.00919948	0.0315291	0.0317356				382.5	417.038	402.658	433.206	950.39	1186.49				0.0271432	0.360851	0.547349	0.219998	0.411822	0.328737	0.0886954				559.899	366.143	244.772	651.829	296.67	625.404				0.821217
462	65.8949	50.5298	71.6698	77.0286	146.488	80.2266				0.0689097	-0.00168261	0.133969	-0.000281959	0.0764164	-0.000422935	0.0461513	0.0229196				524.053	374.547	438.5	418.647	984.939	1092.25				0.40726	0.222198	0.685083	0.178997	0.463145	0.223193	0.0909376				671.456	365.781	212.913	708.024	287.864	610.486				1.18409
465	67.3053	48.4821	74.4328	74.769	160.198	83.4376				0.0917884	-0.042139	0.177686	-0.0296082	0.177161	0.0395843	0.0690787	0.0395691				584.105	415.83	433.725	397.485	905.829	1247.96				0.568522	0.35691	0.666733	0.119401	0.345626	0.397581	0.0955095				549.266	374.695	217.793	687.122	291.84	642.486				0.786631
468	66.7016	52.3502	70.2709	76.8036	162.252	84.6304				0.0819955	0.034283	0.111836	-0.00320213	0.192256	0.0544459	0.0786023	0.0278524				609.737	328.962	412.508	431.088	935.671	1147.86				0.637352	0.0734481	0.585201	0.214034	0.389956	0.285474	0.107228				648.987	364.762	225.88	614.732	306.548	629.205				1.111
471	66.8742	45.424	71.3521	75.6499	159.308	81.249				0.0847954	-0.102558	0.128943	-0.0181755	0.170623	0.0123156	0.0459906	0.0413272				465.316	399.396	389.367	418.676	970.61	1180.23				0.249532	0.303284	0.496272	0.17908	0.441858	0.321723	0.0591795				645.38	362.352	260.033	668.366	286.51	582.409				1.09927
474	64.8945	49.6997	75.3174	77.5572	168.877	83.8567				0.0526818	-0.0180829	0.191682	0.00657849	0.240932	0.044806	0.0864329	0.042864				487.947	378.321	434.083	448.603	1058.67	1153.63				0.310305	0.234512	0.66811	0.263359	0.572675	0.291938	0.0881256				547.405	328.152	249.217	699.049	300.262	607.432				0.780579
477	65.2166	48.9978	71.7885	78.1144	156.578	82.9072				0.0579067	-0.0319503	0.135847	0.0138101	0.150557	0.0329758	0.0598578	0.0290266				436.447	369.226	425.058	417.471	854.122	1163.23				0.17201	0.204836	0.633429	0.175684	0.268813	0.302685	0.0873586				636.987	330.724	232.489	684	295.728	653.236				1.07197
480	61.2194	52.396	72.4827	77.578	156.981	82.5665				-0.00693361	0.0351879	0.146831	0.00684845	0.153524	0.0287309	0.060698	0.0289724				474.711	404.868	395.075	419.029	981.72	1130.63				0.27476	0.321139	0.518208	0.180074	0.458362	0.266181	0.0614019				652.683	378.409	184.011	561.439	288.436	583.027				1.12302
483	67.5259	55.2001	74.4564	75.9595	156.017	77.8901				0.0953669	0.0905885	0.178059	-0.0141573	0.146436	-0.0295344	0.0777932	0.0342597				550.132	361.491	378.15	452.515	1008.17	1148.82				0.477291	0.179593	0.453168	0.274375	0.497656	0.286555	0.0632129				674.392	325.695	197.283	656.341	292.538	627.827				1.19364
486	65.4219	48.9683	75.4797	74.0436	160.484	80.8019				0.061237	-0.0325332	0.19425	-0.0390229	0.179263	0.00674497	0.0616564	0.0422042				509.316	429.566	402.967	397.838	925.793	1169.12				0.367687	0.401732	0.548534	0.120395	0.375282	0.309287	0.0689031				638.835	417.676	224.837	626.195	291.214	620.259				1.07798
489	63.5602	48.9356	76.5107	76.5364	162.211	76.9643				0.0310375	-0.0331792	0.210563	-0.00666999	0.191954	-0.0410693	0.0587726	0.0462792				467.105	381.472	451.867	450.221	940.244	1089.88				0.254337	0.244794	0.736449	0.267915	0.396749	0.22054	0.0932661				665.721	319.457	242.587	594.317	299.461	594.959				1.16543
492	63.0463	48.3379	73.6174	78.0947	161.549	79.611				0.0227013	-0.044988	0.164784	0.0135545	0.187091	-0.00809296	0.0558418	0.039258				499.5	450.358	438.95	423.971	988.39	1172.81				0.341328	0.469581	0.686812	0.193989	0.468272	0.313412	0.0814026				618.595	370.076	222.652	712.78	299.137	557				1.01214
495	68.0068	48.9808	74.3908	76.1692	145.905	75.9665				0.103168	-0.0322862	0.177021	-0.0114357	0.0721309	-0.0535013	0.0425161	0.0366846				369.132	385.075	407.008	399.103	917.671	1184.77				-0.00875557	0.256553	0.564066	0.123956	0.363216	0.326812	0.0984527				685.468	365.648	205.207	660.073	287.712	621.141				1.22967
498	62.6212	46.8891	76.1021	75.5326	150.475	74.7867				0.0158056	-0.0736119	0.204098	-0.0196978	0.105713	-0.0682009	0.0273509	0.0443661				540.579	376.509	428.392	424.074	930.39	1144.18				0.451639	0.228601	0.646238	0.194279	0.382112	0.281348	0.0816798				722.19	367.781	256.543	654.927	304.968	642.259				1.34911
501	63.1055	48.8646	74.0208	74.9436	155.987	78.8935				0.0236616	-0.034582	0.171167	-0.0273422	0.146217	-0.0170326	0.0436814	0.0374266				389.658	371.755	422.983	434.765	944.463	1221.82				0.0463646	0.213086	0.625455	0.224387	0.403017	0.368307	0.0985153				653.861	358.352	200.859	655.073	290.036	590.227				1.12685
504	66.6773	48.1555	74.987	74.6778	158.226	80.0228				0.0816014	-0.0485917	0.186454	-0.0307919	0.162671	-0.00296217	0.0580636	0.0412213				379.105	483.66	440.575	478.632	939.195	1161.12				0.0180272	0.578249	0.693057	0.347928	0.395191	0.300327	0.115343				653.709	349.752	203.565	640.561	291.346	570.336				1.12636
507	66.0802	46.5779	72.8097	75.8558	156.189	80.5992				0.0719155	-0.0797603	0.152005	-0.0155032	0.1477	0.00421945	0.0467628	0.0381191				396.026	413.302	351.017	430.588	885.512	1146.05				0.0634659	0.34866	0.348899	0.212626	0.315444	0.28345	0.0546278				625.532	372.2	201.467	554.097	300.376	607.632				1.03471
510	66.3421	51.0176	75.6683	76.922	159.327	81.5038				0.0761639	0.00795486	0.197234	-0.00166547	0.170761	0.0154902	0.0776564	0.0355829				520.5	406.396	413.5	428.794	958.159	1121.05				0.39772	0.326126	0.589012	0.207573	0.423362	0.255453	0.0625021				652.595	303.686	202.652	602.683	287.916	592.364				1.12274
513	67.1545	48.316	76.1027	73.1716	164.286	79.9342				0.0893422	-0.0454207	0.204107	-0.0503402	0.2072	-0.00406607	0.0668037	0.0484461				414.105	378.792	419.958	445.926	869.195	1161.4				0.112014	0.236051	0.61383	0.255821	0.291205	0.300642	0.0836453				645.405	353.105	202.359	686.659	290.288	589.723				1.09935
516	67.9987	46.6771	73.7257	75.4898	162.852	78.8293				0.103036	-0.0778004	0.166498	-0.0202533	0.196665	-0.0178325	0.0583855	0.0459503				379.947	349.679	454.383	412.794	976.915	1148.61				0.0202885	0.141051	0.74612	0.162514	0.451224	0.286319	0.131188				593	315.724	174.761	625.537	294.272	600.477				0.928888
519	65.8495	47.9143	71.7771	72.6341	145.295	77.8939				0.0681732	-0.053357	0.135667	-0.0573161	0.067653	-0.029487	0.0218888	0.0325356				389.368	397.943	405.325	457.75	957.256	1079.7				0.0455872	0.298543	0.557597	0.289119	0.422021	0.209145	0.0847183				667.861	350.714	178.696	548.463	295.935	605.391				1.17239
522	66.4882	49.7041	75.5328	72.999	165.036	79.1354				0.0785339	-0.017996	0.19509	-0.0525802	0.212707	-0.0140187	0.066956	0.0468538				415.289	464.906	445.675	432.956	830.134	1041.05				0.115194	0.51705	0.712655	0.219294	0.233179	0.165862	0.110644				663.19	333.981	180.989	696.097	289.441	646.436				1.1572
525	62.7357	49.0063	77.9694	73.0877	147.144	78.2935				0.017663	-0.0317824	0.233642	-0.051429	0.0812368	-0.0245082	0.0374704	0.0437156				551.368	465.868	392.792	441.044	872.963	1151.84				0.480612	0.52019	0.509434	0.242072	0.296803	0.289934	0.0583217				666.304	359.829	194.902	621.756	300.107	563.877				1.16733
528	63.8105	46.1266	73.3598	72.4407	165.757	78.8491				0.0350977	-0.0886766	0.160709	-0.0598262	0.218009	-0.0175858	0.0412878	0.0503689				524.237	440.66	396.017	459.735	837.28	1142.49				0.407755	0.437934	0.521827	0.29471	0.243795	0.279462	0.0500302				654.823	309.381	221.228	658.024	295.937	612.654				1.12998
531	66.8958	47.5594	72.6865	77.6009	163.52	81.6087				0.0851457	-0.0603688	0.150056	0.00714565	0.201568	0.0167972	0.0667239	0.0398586				462.237	403.585	466.558	471.412	814.378	1157.96				0.241264	0.316952	0.792906	0.327593	0.209773	0.296791	0.106163				630.165	295.867	189.359	623.195	295.433	586.791				1.04978
534	58.1667	48.1884	72.1984	71.9619	166.34	84.243				-0.0564528	-0.0479417	0.142333	-0.0660403	0.222294	0.0496191	0.0406352	0.0490152				478.684	416.698	421.692	448.647	856.659	1238.05				0.285431	0.359742	0.620491	0.263483	0.272582	0.38648	0.067221				607.81	310.171	174.848	644.976	290.551	570.777				0.977062
537	66.8337	48.6818	74.898	74.2713	166.998	77.7882				0.0841384	-0.0381935	0.185046	-0.0360677	0.227129	-0.030804	0.065208	0.0486843				573.447	483.642	469.267	427.029	936.268	1238.35				0.539902	0.578187	0.803314	0.202603	0.390843	0.386814	0.100005				646.937	317.829	202.446	688.073	295.011	598.427				1.10433
540	62.9328	51.7167	77.067	74.931	160.677	83.1247				0.0208602	0.021767	0.219364	-0.0275057	0.180677	0.0356857	0.0751415	0.040754				580.658	361.604	398.683	414.544	840.915	1225.23				0.559265	0.179962	0.532074	0.167442	0.249194	0.372118	0.0861901				655.038	293.105	216.609	637.195	299.483	582.191				1.13068
543	61.4044	47.5317	74.9022	73.6003	165.305	75.2669				-0.00393264	-0.0609161	0.185113	-0.0447763	0.214685	-0.0622179	0.0379925	0.0520571				627.053	414.34	446.792	466.279	884.988	1090.93				0.68385	0.352046	0.716947	0.313139	0.314665	0.221719	0.0919712				587.595	320.591	225.435	763.463	296.258	575.318				0.911307
546	62.1424	47.0999	75.1746	76.7009	171.211	77.4274				0.00803877	-0.0694471	0.189423	-0.00453502	0.258087	-0.0352993	0.0577112	0.0543632				506.421	406.623	369.183	451.456	909.89	1197.26				0.359914	0.326865	0.41871	0.271393	0.351658	0.340801	0.023921				692.987	305.695	214.109	710.122	299.975	607.868				1.25412
549	61.5728	50.6671	74.7109	75.9621	160.391	81.297				-0.00120095	0.00103003	0.182086	-0.0141236	0.178576	0.0129136	0.0598802	0.0382534				484.316	421.962	434.4	432.441	927.293	1270.18				0.300553	0.37692	0.669327	0.217844	0.37751	0.422454	0.0761502				705.063	298.371	237.348	680.512	289.808	595.809				1.2934
552	65.1439	50.0653	75.1103	74.3726	153.613	81.0133				0.0567274	-0.0108597	0.188405	-0.0347529	0.128773	0.00937889	0.0562787	0.0354528				526.921	489.189	436.758	519.353	850.72	1140.28				0.414963	0.596289	0.67839	0.462606	0.263759	0.276987	0.0721536				668.646	318.2	170.348	589.39	289.266	574.068				1.17495
555	63.7855	49.7491	75.0024	74.3323	155.237	82.249				0.0346922	-0.0171069	0.186698	-0.035276	0.140709	0.024775	0.0557486	0.0362225				565.421	401.208	427.975	387.75	870.5	1145.86				0.518349	0.309195	0.644637	0.0919844	0.293143	0.283234	0.0959998				656.57	265.791	218.804	647.146	298.863	545.495				1.13566
558	64.6306	50.0788	74.6132	76.5758	153.082	85.3072				0.0484009	-0.010593	0.18054	-0.00615864	0.124872	0.0628784	0.0666567	0.0305372				369.526	375.491	407.575	488.368	909.024	1130.96				-0.00769567	0.225277	0.566243	0.375344	0.350372	0.266554	0.0946947				694.177	343.267	165.957	532.976	303.663	604.123				1.25799
561	63.5184	46.3116	75.88	76.8911	169.002	81.8293				0.0303595	-0.0850216	0.200584	-0.00206651	0.241853	0.0195458	0.0675423	0.0516047				434.368	432.208	390.983	429.588	851.195	1243.54				0.166428	0.410352	0.502484	0.209809	0.264466	0.39263	0.0631833				645.646	296.933	258.326	614.683	296.874	595.332				1.10013
564	65.3187	47.0427	75.9856	74.9334	155.254	81.9224				0.0595629	-0.0705772	0.202254	-0.0274746	0.140833	0.0207058	0.0542173	0.0419587				534.711	425.396	412.625	410.118	918.232	1278.6				0.43588	0.388125	0.58565	0.154976	0.36405	0.431885	0.0693563				675.949	370.019	212.25	605.366	300.099	601.536				1.1987
567	65.2991	51.1178	79.1118	72.1637	163.828	81.4065				0.059245	0.00993451	0.251718	-0.0634212	0.203834	0.0142779	0.0792647	0.0500159				404.289	437.208	457.3	419.059	931.988	1064.07				0.0856554	0.426667	0.757328	0.180156	0.384485	0.191639	0.116251				665.468	316.886	232.315	648.634	289.928	602.536				1.16461
570	63.4513	49.1991	74.5711	72.9708	165.387	84.5091				0.029271	-0.0279732	0.179874	-0.0529462	0.215289	0.0529345	0.0660749	0.0446294				427.526	387.849	425.483	447.029	851.561	1310.82				0.148054	0.265604	0.635062	0.258927	0.265009	0.467977	0.0831843				639.468	321.8	210.793	632.268	298.575	587.491				1.08004
573	62.4197	51.9353	75.6926	74.8858	166.26	79.6251				0.012537	0.0260859	0.197619	-0.0280924	0.221703	-0.00791728	0.0703225	0.0448046				448.342	408.34	411.508	379.382	852.549	1244.82				0.203952	0.332467	0.581358	0.0684195	0.266477	0.394064	0.0847783				668.127	314.105	198.815	800.244	297.946	597.964				1.17326
576	65.3004	50.3172	76.6282	75.3315	154.626	83.8198				0.0592661	-0.00588294	0.212422	-0.0223078	0.136218	0.0443463	0.0706769	0.036386				428.263	511.057	415.9	416.809	911.915	1327.72				0.150033	0.667647	0.598235	0.17382	0.354666	0.486897	0.106304				640.949	324.619	198.793	686.561	293.894	588.959				1.08486
579	63.6517	53.4793	75.2993	71.6573	169.071	82.2631				0.0325218	0.0565907	0.191396	-0.0699935	0.242361	0.0249507	0.0796376	0.0472934				506.632	416.623	479.9	423.838	968.695	1208.91				0.360479	0.359496	0.844176	0.193616	0.439014	0.353846	0.108827				639.177	320.2	229.391	650.366	306.529	616.782				1.07909
582	62.2462	48.6665	77.5581	74.7036	142.551	79.87				0.00972256	-0.0384958	0.227135	-0.030457	0.0474903	-0.00486596	0.0350881	0.0404088				428.395	425.698	423.717	436.044	819.793	1132.6				0.150386	0.38911	0.628273	0.227991	0.217817	0.268381	0.0858626				686.177	338.409	225.598	627.634	290.741	608.791				1.23197
585	63.9292	50.3543	77.9847	75.7881	154.475	85.1954				0.0370232	-0.00514996	0.233884	-0.0163818	0.135105	0.0614854	0.0743278	0.0388389				456.289	420.736	421.833	391.147	895.11	1159.33				0.225293	0.372918	0.621036	0.101551	0.329702	0.298323	0.0865147				646.772	327.971	200.315	708.195	291.773	646.404				1.1038
588	64.7474	50.6426	77.7916	74.3782	159.763	80.8468				0.0502956	0.000545985	0.230829	-0.0346803	0.173961	0.0073044	0.071376	0.0434984				399.342	433.962	385.575	429.515	833.854	1198.77				0.0723699	0.416077	0.481701	0.209602	0.238705	0.34249	0.0737914				647.721	292.276	234.946	719.22	295.9	581.418				1.10688
591	64.7811	50.4947	75.1298	74.796	149.179	75.8863				0.0508423	-0.00237608	0.188714	-0.0292578	0.0961939	-0.0545006	0.0416026	0.0369226				430.579	499.774	391.325	362.412	780.707	1324.05				0.156251	0.630829	0.503797	0.0206267	0.159755	0.482791	0.116017				680.721	294.676	202.63	792.415	306.839	580.127				1.21423
594	67.3027	48.4143	77.9649	73.2115	156.606	75.4468				0.0917462	-0.0434785	0.233571	-0.0498223	0.150763	-0.0599765	0.0538005	0.0504332				519.789	463.491	412.608	464.529	864.549	1237.4				0.395812	0.512432	0.585585	0.308211	0.284303	0.385753	0.0580605				638.848	322.733	220.587	588.049	299.412	569.927				1.07802
597	64.0228	49.983	75.3808	72.1423	164.508	79.0863				0.0385416	-0.0124857	0.192685	-0.063699	0.208834	-0.0146304	0.0582076	0.0470189				465.553	614.415	396.692	426.5	837.561	1251.54				0.250168	1.00492	0.524421	0.201112	0.244212	0.401589	0.151257				658.683	312.029	230.62	648.39	299.495	609.173				1.14254
600	68.8527	47.7786	75.8602	75.7668	161.824	79.8924				0.116889	-0.0560381	0.20027	-0.0166583	0.189111	-0.00458687	0.0714979	0.0455709				527.368	470.679	437.125	449.794	821.134	1326.11				0.416164	0.53589	0.679799	0.266713	0.21981	0.485089	0.0849842				704.76	323.724	161.554	706.366	290.62	567.255				1.29242
603	65.9318	48.8998	77.1707	73.8467	165.503	74.4586				0.0695083	-0.0338865	0.221005	-0.0415783	0.216141	-0.0722889	0.0598168	0.0538597				419.763	490.132	401.233	389.647	888.915	1315.65				0.127208	0.599367	0.541873	0.097327	0.320499	0.47338	0.103087				649.76	268.076	194.457	645.097	301.071	580.886				1.11351
606	67.5545	46.141	78.2559	71.593	163.14	80.746				0.0958308	-0.0883921	0.238175	-0.0708281	0.19878	0.00604849	0.0632691	0.0560574				427.342	509.434	410.725	418.368	897.524	1252.04				0.14756	0.662352	0.578348	0.17821	0.333289	0.402139	0.103922				648.266	290.524	193.141	586.634	303.374	562.259				1.10865
609	62.8898	47.2346	80.057	74.113	157.478	80.7179				0.0201627	-0.0667859	0.266673	-0.0381222	0.157177	0.00569838	0.0574671	0.0523949				495.789	451.585	366.525	420.103	918.915	1211.04				0.331364	0.473582	0.408495	0.183097	0.365064	0.356223	0.0485274				695.886	298.286	206.109	678.268	291.733	584.959				1.26355
612	66.2002	47.3389	78.1332	77.2142	172.308	81.0217				0.0738621	-0.0647252	0.236234	0.00212686	0.26615	0.00948355	0.0871885	0.0550062				430.053	545.641	410.642	470.221	874.293	1254.05				0.154838	0.780502	0.578028	0.324239	0.298778	0.404398	0.111545				670.798	321.038	214.576	652.659	292.695	595.141				1.18194
615	66.0443	47.9783	78.6585	72.9298	164.508	79.7384				0.0713332	-0.0520926	0.244545	-0.0534784	0.208834	-0.00650562	0.0687726	0.0534604				418.947	488.981	414.825	481.632	815.646	1124				0.125017	0.595611	0.594104	0.356377	0.211657	0.258754	0.0964839				564.937	330.01	179.043	607.927	302.518	620.818				0.837605
618	64.9043	48.0317	75.9924	71.7402	159.884	82.0061				0.0528408	-0.0510376	0.202362	-0.0689176	0.174854	0.0217486	0.0553083	0.0461121				512.447	416.226	420.133	446	935.61	1362.4				0.376096	0.358203	0.614503	0.256028	0.389865	0.525739	0.0588025				582.329	315.067	202.174	542.683	303.231	572.427				0.894178
621	69.0119	51.4494	78.7203	71.0224	162.146	77.8312				0.119472	0.0164859	0.245523	-0.0782336	0.191473	-0.0302682	0.0774087	0.0524636				443.684	499.038	441.017	461.338	881.5	1280.19				0.191444	0.628428	0.694754	0.299224	0.309484	0.433673	0.099464				659.899	324.152	217.152	650.927	296.576	662.236				1.14649
624	67.8887	48.9095	77.8068	74.3897	156.241	83.7703				0.101252	-0.0336949	0.23107	-0.034531	0.148084	0.0437295	0.075985	0.0428843				549.316	411.755	447	463.882	886.037	1285.07				0.475101	0.343611	0.717747	0.306389	0.316223	0.439135	0.0776221				705.038	283.048	211.826	587.293	299.573	549.841				1.29332
627	66.9248	49.8678	76.4905	75.117	166.419	79.9768				0.0856162	-0.0147617	0.210243	-0.0250917	0.222871	-0.0035353	0.0792236	0.0463341				491.711	476.717	377.475	425.029	908.268	1218				0.320411	0.555592	0.450574	0.196971	0.349249	0.364024	0.0606883				607.709	395.409	176.043	585.024	313.993	592.791				0.976733
630	64.8005	48.7535	80.6168	76.1882	178.951	76.2103				0.051157	-0.036777	0.27553	-0.0111891	0.314963	-0.0504637	0.0905367	0.0664777				402.395	473.472	430.767	389.059	934.878	1235.19				0.0805672	0.545002	0.655365	0.0956702	0.388778	0.383278	0.116191				617.418	292.124	198.446	614.976	309.385	570.232				1.00831
633	64.075	48.8747	78.9078	72.9025	163.381	81.0274				0.0393883	-0.0343824	0.24849	-0.0538327	0.200552	0.00955457	0.0682949	0.0515448				396.211	488.151	420.142	463.912	858.659	1260.3				0.0639605	0.592902	0.614535	0.306472	0.275553	0.411393	0.103946				628.354	325.638	199.272	718.22	300.517	598.8				1.04389
636	63.4336	47.4516	77.0178	74.8587	147.748	78.2783				0.0289839	-0.0624986	0.218586	-0.0284441	0.0856736	-0.0246976	0.0362672	0.0421873				507.763	483.981	401.542	463.441	890.293	1213.04				0.363518	0.579296	0.543058	0.305146	0.322546	0.358463	0.0576023				664.114	309.514	228.38	666.122	309.936	618.582				1.1602
639	65.7934	47.6916	79.7804	73.3777	158.221	78.2901				0.0672632	-0.0577569	0.262296	-0.0476653	0.16263	-0.0245506	0.0603695	0.0529515				403.342	575.679	424.733	423.735	977.927	1246.81				0.0831113	0.878519	0.63218	0.193326	0.452728	0.396284	0.144446				689.506	286.971	216.772	672.585	300.38	588.055				1.2428
642	64.1164	45.9265	74.7714	70.1455	159.798	71.216				0.0400599	-0.09263	0.183043	-0.0896145	0.174222	-0.11269	0.0170651	0.0556853				527.921	513.396	430.933	428.868	891.963	1264.77				0.417648	0.675281	0.656005	0.20778	0.325028	0.416403	0.0917397				604.317	279.286	200.728	638.439	295.978	577.218				0.965698
645	67.7225	50.2739	78.8394	74.9557	159.725	80.7532				0.098556	-0.00673842	0.247408	-0.0271852	0.173686	0.0061382	0.0819774	0.0453104				527.868	469.717	384.658	468.015	905.39	1210.23				0.417507	0.53275	0.478178	0.318026	0.344974	0.35532	0.0400727				715.443	327.171	237.598	754.878	297.22	600.9				1.32717
648	68.6052	48.2698	79.5234	76.2372	159.804	81.0224				0.112875	-0.0463334	0.25823	-0.0105532	0.174263	0.00949227	0.0829955	0.0485832				417.395	459.547	418.517	344.868	901.622	1301.72				0.120847	0.499565	0.60829	-0.0287814	0.339376	0.45778	0.117538				657.899	302.533	192.848	635.488	312.504	620.436				1.13999
651	64.7184	46.3304	80.2211	71.5758	162.394	78.7243				0.0498252	-0.0846502	0.269269	-0.0710513	0.1933	-0.0191407	0.0562587	0.059426				396.763	515.528	405.608	451.265	941.927	1285.26				0.0654447	0.682238	0.558686	0.270855	0.399249	0.439351	0.108013				566.873	353.124	237.098	757.244	303.276	613.782				0.843904
654	63.2965	49.5176	80.8152	74.0684	163.622	84.7274				0.0267599	-0.0216806	0.278669	-0.038701	0.202323	0.0556544	0.0838375	0.052345				421.632	518.151	436.75	382.515	928.976	1222.11				0.132225	0.690796	0.678358	0.0772407	0.38001	0.368621	0.129996				616.532	323.105	234.011	640.78	306.998	581.809				1.00543
657	65.0499	53.3247	73.2814	76.3892	165.125	77.1833				0.0552026	0.0535362	0.159468	-0.00858043	0.213366	-0.0383407	0.072442	0.0395497				446.211	516.51	437.1	413.529	854.5	1300.35				0.198228	0.68544	0.679703	0.164584	0.269375	0.456247	0.116813				644.266	324.676	250.978	657.854	305.582	576.2				1.09564
660	66.9725	47.5025	77.1558	74.5605	154.557	75.5985				0.0863899	-0.061493	0.220769	-0.0323143	0.135709	-0.0580864	0.0484959	0.0478567				505.632	535.34	438.683	445.588	861.634	1214.14				0.357794	0.746885	0.685787	0.254869	0.279973	0.359701	0.104425				648.025	325.476	194.196	608.341	299.768	609.455				1.10787
[truncated: 11 more columns]

## Sheet: J
10 mM glucose.nd2	10 mM glucose001.nd2	10 mM glucose002.nd2	10 mM glucose003.nd2	10 mM glucose004.nd2	10 mM glucose005.nd2				10 mM glucose.nd2	10 mM glucose001.nd2	10 mM glucose002.nd2	10 mM glucose003.nd2	10 mM glucose004.nd2	10 mM glucose005.nd2					10 mM glucose+phlorizin05.nd2	10 mM glucose+phlorizin06.nd2	10 mM glucose+phlorizin07.nd2	10 mM glucose+phlorizin08.nd2	10 mM glucose+phlorizin09.nd2	10 mM glucose+phlorizin10.nd2				10 mM glucose+phlorizin05.nd2	10 mM glucose+phlorizin06.nd2	10 mM glucose+phlorizin07.nd2	10 mM glucose+phlorizin08.nd2	10 mM glucose+phlorizin09.nd2	10 mM glucose+phlorizin10.nd2						10 mM glucose+alloxan.nd2	10 mM glucose+alloxan01.nd2	10 mM glucose+alloxan02.nd2	10 mM glucose+alloxan03.nd2	10 mM glucose+alloxan04.nd2	10 mM glucose+alloxan05.nd2				10 mM glucose+alloxan.nd2	10 mM glucose+alloxan01.nd2
raw data	raw data	raw data	raw data	raw data	raw data				F/F0	F/F0	F/F0	F/F0	F/F0	F/F0	SEM				raw data	raw data	raw data	raw data	raw data	raw data				F/F0	F/F0	F/F0	F/F0	F/F0	F/F0	Mean	SEM				raw data	raw data	raw data	raw data	raw data	raw data				F/F0	F/F0
389.132	330.981	281.758	352.456	690.768	818.368				0.0449513	0.080036	0.0827505	-0.00741115	0.0261487	-0.0835191	0.0169624				73.6344	89.3267	278.577	1667.48	591.718	2713.62				0.0606952	-0.345789	0.125014	-0.0483539	-0.0310692	-0.0102793	-0.0416303	0.0663056				1470.8	1342.92	564.692	385.429	1222.95	362.534				-0.0277387	-0.0744855
325.289	318.415	241.65	380.588	661.829	973.912				-0.126487	0.0390315	-0.071379	0.0718152	-0.0168407	0.0906726	0.0359868				72.4032	144.139	259.567	1611.06	572.313	2634.57				0.0429599	0.0556427	0.0482425	-0.0805508	-0.0628432	-0.0391113	-0.00594335	0.0251823				1486.7	1354.38	651.218	378.141	1219.04	353.005				-0.0172346	-0.0665835
410.553	279.019	258.183	359.647	619.634	963.386				0.102474	-0.0895237	-0.0078443	0.0128408	-0.0795223	0.0788844	0.0348621				69.4851	127.049	262.546	1665.83	609.069	2745.88				0.00092501	-0.0695145	0.0602746	-0.0492952	-0.00265662	0.00148628	-0.00979673	0.0185558				1449.77	1515.42	634.154	383.988	1233.9	351.895				-0.0416447	0.0444032
387.526	316.755	220.608	397.279	631.207	913.175				0.0406405	0.0336133	-0.152239	0.118821	-0.0623302	0.0226541	0.0468344				70.0554	134.554	260.835	1676.47	625.966	2734.22				0.00914012	-0.0145494	0.0533636	-0.0432249	0.0250125	-0.00276468	0.00449622	0.0135687				1584.46	1463.38	573	373.041	1234.82	356.338				0.0473942	0.00853732
384.816	313.302	263.017	316.632	656.232	861.035				0.0333619	0.0223464	0.0107297	-0.108298	-0.025156	-0.0357372	0.0256812				71.5233	126.01	215.577	1720.69	604.819	2749.21				0.0302851	-0.0771283	-0.129407	-0.0179877	-0.00961595	0.00269986	-0.0335256	0.024008				1576.34	1531.53	606.59	376.088	1217.81	365.909				0.0420252	0.0555056
362.211	295.396	301.558	345.838	699.171	947.158				-0.0273411	-0.0360823	0.158839	-0.026048	0.0386307	0.0607107	0.0368221				71.1832	171.267	234.732	1653.71	614.323	2797.81				0.0253859	0.254328	-0.0520518	-0.0562104	0.00594691	0.0204267	0.0329709	0.0465927				1580.73	1466.78	647.936	395.471	1196.38	368.822				0.0449274	0.0108787
352.368	349.642	260.225	337.662	647.878	902.684				-0.0537705	0.140927	1.61399e-06	-0.0490744	-0.0375654	0.0109051	0.0364494				71.0959	148.386	222.763	1680.45	612.659	2757.45				0.0241284	0.0867506	-0.100388	-0.0409494	0.00322295	0.0057057	-0.00358834	0.0257087				1573.12	1392.58	626.667	338.535	1207.28	348.128				0.039897	-0.0402624
350.132	328.585	252.517	397.529	658.878	896.404				-0.0597771	0.0722169	-0.0296201	0.119525	-0.0212247	0.00387146	0.0339754				68.7128	128.693	242.371	1709.29	635.424	2697.91				-0.0101999	-0.0574771	-0.0212019	-0.0244952	0.0405	-0.0160079	-0.0148137	0.0129577				1516.83	1494.15	690.833	337.488	1256.27	364.607				0.00268524	0.0297414
311.974	322.075	226.683	344.044	679.012	905.246				-0.162244	0.0509758	-0.128894	-0.0311005	0.00868484	0.0137736	0.0404898				70.2627	136.248	274.567	1745.1	634.522	2731.48				0.0121262	-0.00215016	0.108819	-0.00405351	0.0390219	-0.00376453	0.0249998	0.0180708				1504.8	1502	615.551	358.988	1208.57	345.361				-0.00526331	0.0351511
413.658	279	253.892	358.632	699.585	867.596				0.110813	-0.0895853	-0.0243362	0.00998316	0.0392467	-0.0283891	0.0332504				69.9232	124.228	225.206	1790.53	629.043	2744.17				0.00723579	-0.0901808	-0.0905211	0.021873	0.0300511	0.000863701	-0.0201131	0.0226083				1519.02	1508.26	653.769	357.524	1219.86	353.114				0.00413635	0.0394656
284.974	274.377	252.583	380.676	645.939	966.368				-0.234748	-0.10467	-0.0293642	0.0720639	-0.040446	0.0822243	0.0505064				66.8729	144.861	246.979	1783.25	618.213	2729.05				-0.0367034	0.0609363	-0.0025916	0.0177149	0.0123176	-0.00465113	0.00783711	0.0131476				1477.13	1464.9	685.602	362.753	1216.95	331.183				-0.0235548	0.00958529
308.579	372.226	285.2	354.324	639.72	814.895				-0.17136	0.214625	0.0959764	-0.0021516	-0.0496852	-0.0874093	0.065416				69.849	124.327	244.639	1795.77	615.27	2737.02				0.00616695	-0.0894557	-0.0120423	0.0248599	0.0074981	-0.00174593	-0.0107865	0.016497				1522.4	1410.92	678.359	368.671	1248.03	335.607				0.00636941	-0.0276211
370.632	305.642	279.425	319.75	735.488	937.298				-0.00472756	-0.00265053	0.073784	-0.0995177	0.0925804	0.0496689	0.0340889				70.3744	132.297	262.216	1831.22	601.24	2820.48				0.0137353	-0.0310828	0.0589423	0.0450942	-0.0154755	0.0286958	0.0166515	0.0142148				1458.23	1476.32	615.41	382.976	1237.08	377.37				-0.0360501	0.0174495
400.289	282.264	267.625	324.397	671.024	802.649				0.074914	-0.0789338	0.0284386	-0.0864305	-0.00318118	-0.101123	0.0310498				64.1811	148.297	229.433	1722.74	625.305	2700.47				-0.0754785	0.086098	-0.0734515	-0.0168167	0.0239305	-0.0150772	-0.0117992	0.0250016				1523.11	1379.3	650.308	407.235	1192.65	352.073				0.0068369	-0.0494105
398.553	339.887	254.267	399.779	676.524	817.333				0.0702499	0.109097	-0.0228951	0.125862	0.00498916	-0.0846783	0.0289127				69.7548	145.594	289.99	1784.68	601.486	2746.86				0.00481001	0.0663025	0.171102	0.0185302	-0.0150727	0.0018447	0.0412529	0.0283186				1521.54	1549.25	618.282	344.659	1207.7	368.452				0.00579702	0.0677126
353.684	328.717	234.85	350.897	659.695	952.14				-0.0502371	0.0726479	-0.0975103	-0.011801	-0.0200111	0.0662905	0.0278957				69.0205	176.574	230.691	1764.57	637.374	2720.22				-0.0057675	0.293195	-0.0683723	0.00705677	0.0436931	-0.0078708	0.0436558	0.052044				1531.7	1271.1	681.821	389.877	1227.66	352.47				0.0125122	-0.123984
422.342	277.792	254.233	376.721	689.561	851.982				0.134133	-0.0935259	-0.0230235	0.0609233	0.0243553	-0.0458751	0.038378				72.1942	110.564	251.711	1784.16	603.591	2807.31				0.0399493	-0.190248	0.0165178	0.0182338	-0.0116274	0.0238916	-0.0172138	0.0352721				1476.72	1446.01	661.898	364.923	1241.55	379.53				-0.0238289	-0.00343363
391.289	271	246.55	325.441	723.963	856.07				0.050746	-0.11569	-0.0525491	-0.0834901	0.0754607	-0.0412973	0.037573				67.6998	144.139	236.041	1908.01	607.174	2762.43				-0.024792	0.0556427	-0.0467647	0.0889201	-0.00575901	0.00752311	0.0124617	0.0207866				1484.1	1472.92	591.821	364.235	1255.81	367.137				-0.0189517	0.0151082
415.526	297.962	278.192	342.088	684.878	891.386				0.11583	-0.0277091	0.0690447	-0.0366087	0.0173987	-0.00174757	0.0289725				65.3049	143.356	215.361	1869.82	599.128	2703.38				-0.0592903	0.049914	-0.130281	0.0671221	-0.0189341	-0.0140145	-0.0175806	0.0295441				1472.98	1531.78	676.718	418.382	1233.1	346.238				-0.0263038	0.0556755
414.316	246.038	291.475	337.368	692.329	919.842				0.112579	-0.197146	0.12009	-0.0499029	0.0284676	0.0301201	0.0588316				64.8869	130.911	268.619	1879.3	575.185	2802.53				-0.0653115	-0.0412344	0.0847967	0.0725327	-0.058141	0.0221497	0.00246537	0.0272347				1524.85	1446.01	603.782	345.312	1139.14	364.676				0.00798969	-0.00343363
365.737	320.491	299.642	348.838	645.268	968				-0.0178718	0.0458041	0.151473	-0.0175993	-0.0414423	0.0840515	0.0349938				66.8655	159.267	256.402	1931.4	625.422	2797.43				-0.03681	0.166442	0.0354613	0.102269	0.0241207	0.0202884	0.0519619	0.0291934				1516.2	1483.03	616.167	401.959	1236.13	352.461				0.00226607	0.0220755
315.842	347.868	307.975	363.647	637.122	980.684				-0.151856	0.13514	0.183497	0.0241056	-0.053544	0.0982564	0.0611022				67.4247	120.228	245.206	1895.91	592.197	2695.52				-0.0287548	-0.119476	-0.00975254	0.0820124	-0.0302837	-0.0168819	-0.0205228	0.0262027				1411.7	1400.05	700.808	387.041	1132.96	323.712				-0.0668126	-0.0351077
361.079	297.868	302.708	355.5	731.939	971.228				-0.0303798	-0.0280168	0.163258	0.00116167	0.0873085	0.0876666	0.0377556				71.8869	168.376	274.577	1919.06	614.451	2657.31				0.0355227	0.233154	0.108861	0.0952276	0.00615716	-0.0308169	0.0746842	0.0383244				1503.52	1517.96	609.718	387.018	1222.05	340.731				-0.00610977	0.0461497
381.395	382.547	281.217	327.309	690.817	1000.88				0.024175	0.248303	0.0806692	-0.0782306	0.0262212	0.12087	0.0535804				67.8947	117.436	240.794	2006.66	623.904	2836.4				-0.0219845	-0.139925	-0.0275717	0.14522	0.0216359	0.0345	0.00197918	0.0380991				1495.77	1435.42	712.398	338.765	1188.66	364.589				-0.0112369	-0.0107314
426.368	315.434	249.625	356.529	699	1040.75				0.144945	0.0293037	-0.0407324	0.00406068	0.0383771	0.165528	0.0306791				66.3794	146.475	236.763	1987.12	618.988	2702.22				-0.0438122	0.0727562	-0.0438502	0.134065	0.0135856	-0.0144358	0.0197182	0.0289652				1454.77	1336.74	589.474	363.988	1180.95	372.447				-0.0383395	-0.0787433
474.289	318.038	270.567	319.75	678.341	987.035				0.273629	0.0378003	0.0397431	-0.0995177	0.0076885	0.105369	0.0609887				70.7927	156.901	205.856	1974.75	629.595	2727.4				0.0197608	0.149112	-0.168667	0.127009	0.030954	-0.00525486	0.0254858	0.0462938				1492.62	1429.56	668.654	380.312	1176.56	348.648				-0.0133168	-0.0147721
523	310.264	290.558	355.471	690.22	1038.21				0.404434	0.012434	0.116567	0.00107887	0.0253335	0.16268	0.0759165				69.9557	170	231.567	1937.53	621.077	2698.24				0.00770395	0.245047	-0.0648335	0.105767	0.0170065	-0.0158884	0.0491337	0.0452969				1462.07	1386.05	621.436	378	1252.65	352.192				-0.0335108	-0.0447562
505.579	367.623	312.575	375.588	715.805	999.491				0.357652	0.199602	0.201174	0.0577342	0.0633411	0.119318	0.0551666				74.3928	168.782	263.814	1969.01	606.424	2754.43				0.0716199	0.236128	0.0653953	0.123733	-0.00698712	0.00460533	0.0824157	0.036418				1428	1364.33	628.051	372.718	1186.2	349.014				-0.0560344	-0.0597294
477.079	374.094	266.375	400.926	775.695	966.702				0.28112	0.22072	0.023635	0.129092	0.152309	0.0825977	0.0435645				68.7826	157.554	229.052	1954.22	618.651	2593.81				-0.00919442	0.153898	-0.0749921	0.115291	0.0130346	-0.0539769	0.0240101	0.0375542				1372.01	1310.51	515.282	414.929	1228.69	372.411				-0.0930446	-0.0968225
472	333.453	261.875	359.147	755.049	1094.21				0.267481	0.0881015	0.00634229	0.0114327	0.121639	0.225393	0.0475766				72.7135	128.069	198.351	1930.99	613.095	2794.88				0.0474297	-0.0620457	-0.198976	0.102032	0.00393542	0.0193577	-0.0147112	0.0428924				1394.09	1272.03	645.398	417.012	1273.02	332.447				-0.0784534	-0.123342
521.237	372.038	334.208	386.441	686.122	1083.19				0.399699	0.21401	0.284307	0.0882985	0.0192464	0.213055	0.0679435				71.7991	124.852	230.99	1935.66	625.343	2657.53				0.0342579	-0.0856122	-0.0671648	0.1047	0.0239925	-0.0307352	-0.00342698	0.0291125				1470.96	1259.45	616.321	343.606	1222.13	356.635				-0.0276339	-0.132009
399.105	325.075	282.467	406.324	801.195	1019.95				0.0717341	0.0607652	0.0854728	0.144291	0.19019	0.142227	0.0245917				68.0681	124.277	234.897	1990.36	616.545	2715.03				-0.0194867	-0.0898183	-0.0513859	0.135918	0.00958475	-0.00976361	-0.00415856	0.031435				1441.49	1295.58	649.744	340.435	1226.87	361.429				-0.0471185	-0.107113
568.711	373.245	294.133	370.015	741.012	1004.39				0.527182	0.21795	0.130306	0.0420381	0.100787	0.1248	0.0857193				70.6146	115.852	229.392	1909.56	606.127	2735.78				0.0171953	-0.151526	-0.0736178	0.0898022	-0.00747395	-0.0021987	-0.0213032	0.0337035				1470.91	1200.99	580.154	401.059	1218.81	387.256				-0.0276661	-0.172302
393.553	382.623	360.342	378.765	792.597	1015.16				0.0568232	0.24855	0.384734	0.0666799	0.177418	0.136863	0.0609924				71.0879	115.238	230.278	1958.52	616.986	2670.9				0.0240132	-0.156023	-0.0700374	0.117745	0.0103084	-0.0258617	-0.0166426	0.0377721				1456.48	1277.51	680.192	401.135	1225.57	338.667				-0.0372109	-0.119566
555.763	408.226	291.508	390.132	724.732	1015.54				0.492414	0.332098	0.120218	0.0986937	0.076602	0.137295	0.0812188				69.9923	112.792	200.835	1809.29	618.258	2678.33				0.00823117	-0.173933	-0.188942	0.0325757	0.0123906	-0.0231514	-0.0554715	0.0405412				1509.61	1165.51	646.102	347.012	1206.25	327.502				-0.00208714	-0.196754
486.921	317.547	278.742	387.779	831.195	991.333				0.307549	0.0361994	0.0711582	0.0920672	0.234755	0.110182	0.0522084				69.7497	97.396	231.237	1874.74	599.401	2768.34				0.00473654	-0.286691	-0.0661657	0.0699311	-0.018487	0.0096799	-0.0478327	0.0510523				1451.63	1178.01	605.487	368.029	1215.1	360.557				-0.0404113	-0.188134
530.342	387.491	335.567	394.485	786.146	1190.42				0.42415	0.264434	0.289527	0.110952	0.167835	0.333138	0.0539327				72.7823	95.0792	216.052	1761.18	633.187	2703.52				0.0484208	-0.303659	-0.127492	0.00512229	0.0368357	-0.0139642	-0.0591226	0.0552004				1524.82	1100.68	614.5	438.229	1172.33	322.352				0.0079655	-0.241428
588.526	408.151	300.117	362.603	779.976	1030.51				0.580394	0.331851	0.153299	0.0211649	0.158668	0.154054	0.0964142				73.8933	91.7624	200	1847.97	649.287	2516.79				0.0644246	-0.32795	-0.192315	0.0546554	0.0631992	-0.0820668	-0.0700087	0.0665822				1535.98	1192.12	695.051	423.229	1263.36	327.571				0.0153418	-0.17841
518.421	306.83	295.45	362.059	847.463	1180.77				0.392138	0.00122836	0.135365	0.0196326	0.258922	0.322332	0.0738854				78.8101	96.5247	217.835	1760.99	632.381	2640.03				0.135251	-0.293072	-0.120289	0.00501117	0.0355168	-0.0371179	-0.0457834	0.0602055				1539.98	1057.47	577.218	391.512	1223.04	363.132				0.0179859	-0.271214
453.974	438.698	317.55	400.015	918.207	971.649				0.219074	0.431531	0.220292	0.126524	0.364013	0.0881381	0.0550247				75.954	100.96	235.567	1784.01	641.551	2653.84				0.0941088	-0.260586	-0.0486798	0.0181522	0.0505329	-0.0320809	-0.0297588	0.0509019				1530.21	1063.63	637.564	362.088	1261.01	362.731				0.0115287	-0.266965
448	372.585	318.883	373.647	878.024	1064.33				0.203033	0.215795	0.225416	0.0522677	0.304321	0.191934	0.0409953				75.7531	76.5545	217.536	1734.69	631.549	2536.48				0.0912148	-0.43933	-0.121496	-0.00999773	0.0341536	-0.0748856	-0.0867235	0.0769937				1498.04	1139.66	632.679	358.953	1258.78	376.584				-0.00973743	-0.214569
460.632	420.377	354.133	394.632	862.439	1117.3				0.236953	0.371748	0.360876	0.111367	0.281169	0.251249	0.0474147				76.3771	90.7921	219.289	1718.6	655.187	2597.19				0.100203	-0.335057	-0.114418	-0.019181	0.0728604	-0.0527443	-0.0580561	0.0641952				1521.27	1201.66	579.808	408.918	1309.97	360.648				0.00561966	-0.171839
540.368	388.208	317.733	341.132	927.756	1080.28				0.451074	0.266774	0.220996	-0.0393005	0.378198	0.209793	0.0841216				76.5894	78.2574	236.639	1826.13	638.435	2624.53				0.103262	-0.426858	-0.0443497	0.0421888	0.0454302	-0.0427711	-0.0538497	0.0781264				1389.01	1197.93	603.538	395.353	1269.4	369.288				-0.081807	-0.174407
480.474	416.358	333.45	360.426	867.146	1087.91				0.290236	0.358634	0.281393	0.0150357	0.288162	0.21834	0.0595884				76.9943	85.5743	255.804	1694.4	606.301	2523.69				0.109094	-0.373271	0.0330463	-0.0329892	-0.00718853	-0.0795515	-0.0584766	0.0681361				1501.57	1214.33	675.692	370.635	1250.04	359.215				-0.00739966	-0.163107
465.763	440.302	334.633	392.044	910.439	1065				0.250733	0.436765	0.28594	0.104077	0.352474	0.192681	0.0554474				77.4663	112.168	229.258	1717.71	582.512	2686.93				0.115893	-0.178501	-0.0741594	-0.0196851	-0.0461431	-0.0200135	-0.0371015	0.0389237				1435	1218.95	600.987	380.941	1225.31	340.708				-0.0514072	-0.159925
594.211	368.755	326.833	319.912	899.11	1055.96				0.595658	0.203296	0.255966	-0.0990621	0.335644	0.182562	0.111922				77.3811	80.8812	256.938	1722.66	568.147	2649.91				0.114666	-0.407642	0.0376259	-0.0168611	-0.0696653	-0.0335146	-0.0625652	0.0738265				1569.77	1182.1	695.026	378.412	1270.37	338.205				0.0376801	-0.185321
574.132	405.283	332.3	374.662	987.915	1147.88				0.541739	0.322493	0.276974	0.0551253	0.467565	0.285494	0.084304				75.1161	75.9802	251.134	1738.25	545.373	2587.81				0.0820389	-0.443536	0.0141865	-0.00796698	-0.106958	-0.0561652	-0.0864001	0.0760535				1411.01	1238.49	621.846	361.594	1288.71	334.078				-0.0672641	-0.146453
406.921	426.415	358.317	439.971	899.854	1101.81				0.0927221	0.39145	0.376952	0.239048	0.336749	0.2339	0.0554611				72.6984	74.7327	209.454	1746.22	531.678	2604.36				0.0472122	-0.452672	-0.154137	-0.00341609	-0.129383	-0.0501284	-0.123754	0.0726346				1500.79	1219.45	636.538	368.053	1280.72	340.215				-0.00791553	-0.159576
486.579	418.774	352.583	368.941	932.841	1145.65				0.306631	0.366515	0.354919	0.0390149	0.385753	0.282999	0.0642285				78.3656	72.2772	217.742	1740.09	522.412	2643.71				0.128848	-0.470656	-0.120664	-0.00691448	-0.144556	-0.0357784	-0.108287	0.0825725				1467.3	1159.18	694.898	402.735	1247.61	339.47				-0.0300523	-0.201116
505.026	410.189	341.333	406.368	903.988	991.14				0.356168	0.338501	0.311687	0.144415	0.34289	0.109966	0.0392504				78.8225	95	216.948	1728.64	521.178	2630.33				0.135429	-0.304239	-0.123869	-0.0134517	-0.146576	-0.0406582	-0.0822275	0.0602761				1494.96	1260.49	709.423	376.812	1245.44	385.872				-0.0117689	-0.131291
477.789	387.981	351.367	333.456	939.049	1029.61				0.283028	0.266035	0.350244	-0.0609191	0.394974	0.153052	0.0803211				76.2674	82.0594	243.196	1643.74	521.768	2683.16				0.0986233	-0.399013	-0.017871	-0.0619027	-0.145612	-0.0213907	-0.0911943	0.0694865				1563.87	1278.49	686.885	362.912	1266.34	352.553				0.0337783	-0.118886
563.026	537.774	357.8	326.662	893.317	1123.81				0.511918	0.754828	0.374966	-0.0800527	0.327039	0.258538	0.136446				75.3304	71.5941	202.196	1657.74	524.895	2684.21				0.0851259	-0.475659	-0.183447	-0.0539128	-0.140491	-0.0210072	-0.131565	0.0788204				1402.12	1203.36	668.949	365.582	1280.68	340.781				-0.0731409	-0.170669
597.342	415.434	389.167	381.691	993.134	1097.82				0.604068	0.355617	0.495503	0.0749215	0.475319	0.229441	0.0905752				75.7883	92.7822	258.237	1580.19	531.415	2594.28				0.0917219	-0.320481	0.0428718	-0.0981686	-0.129814	-0.053807	-0.0779463	0.0594109				1472.77	1224.45	582.308	352.565	1289.06	327.379				-0.0264408	-0.15613
437.289	454.302	326.425	398.632	1023.23	1121.95				0.174272	0.482448	0.254397	0.122631	0.520029	0.256455	0.0807678				80.9856	79.3366	236.361	1709.27	510.054	2668.6				0.166588	-0.418954	-0.045474	-0.0245027	-0.164792	-0.026698	-0.0856389	0.079542				1468.24	1223.3	602.359	409.065	1235.59	385.164				-0.0294316	-0.156923
535.763	369.811	397.3	424.5	1009.52	1038.98				0.438707	0.206744	0.526758	0.19548	0.499667	0.163544	0.0718181				76.2925	73.0396	229.897	1653.6	495.438	2547.34				0.0989848	-0.465072	-0.071578	-0.0562771	-0.188726	-0.070924	-0.125599	0.077541				1435.6	1249.37	634.179	400.147	1228.94	353.753				-0.0510122	-0.138957
469.974	436.34	335.533	377.294	986.793	991.281				0.26204	0.423835	0.289399	0.0625384	0.465898	0.110123	0.0709915				75.5941	73.8614	232.711	1651.04	496.988	2660.6				0.0889245	-0.459054	-0.0602123	-0.0577373	-0.186188	-0.0296158	-0.117314	0.0771503				1515.57	1300.41	538.321	377.459	1250.64	368.945				0.00185491	-0.10378
449.211	398.321	361.192	377.632	1039.83	1027.67				0.206284	0.299774	0.388	0.0634911	0.544685	0.150871	0.0813428				75.5018	121.901	239.67	1623.78	472.668	2773.98				0.0875949	-0.107221	-0.0321097	-0.0732946	-0.226012	0.0117362	-0.0565511	0.0438191				1408.09	1238.27	698.641	372.382	1286.93	375.795				-0.0691989	-0.146604
392.316	510.302	355.05	389.882	1052.91	1134				0.0535019	0.665184	0.364398	0.0979896	0.564124	0.269953	0.121822				77.1607	83.3069	211.103	1687.13	492.26	2653.28				0.111491	-0.389877	-0.147475	-0.0371398	-0.193931	-0.0322884	-0.11487	0.0700103				1528.24	1272.29	665.538	376.612	1297.98	400.932				0.0102308	-0.123162
462.763	441.453	385.458	374.632	1009.5	1032.96				0.242677	0.44052	0.481252	0.0550425	0.49963	0.156805	0.0854803				72.8443	89.2277	270.619	1615.94	505.86	2685.34				0.0493139	-0.346514	0.0928736	-0.0777713	-0.171661	-0.0205921	-0.0790584	0.0657185				1514.06	1242.82	681.667	400.741	1268.48	399.479				0.000855346	-0.14347
460.289	423.283	331.242	407.191	1014.63	1016.02				0.236035	0.38123	0.272907	0.146735	0.507257	0.137826	0.0622413				74.9027	77.802	246.557	1688.57	496.832	2649.31				0.0789649	-0.430193	-0.00429864	-0.0363171	-0.186443	-0.0337347	-0.102004	0.074411				1393.79	1396.96	609.974	389.612	1284.66	390.877				-0.0786468	-0.0372413
490.658	444.245	397.725	439.441	1024.88	1070.25				0.317584	0.449632	0.528391	0.237557	0.522475	0.198555	0.0576665				76.4032	83.396	239.804	1651.08	491.341	2619.48				0.100579	-0.389224	-0.0315685	-0.057715	-0.195436	-0.0446135	-0.102996	0.0689143				1503.96	1300.01	597.308	401.4	1288.41	362.21				-0.00581957	-0.104054
481.974	445.66	372.508	451.324	1087.6	1166.07				0.294264	0.45425	0.431488	0.271021	0.615646	0.305868	0.062195				80.8843	98.1089	274.258	1626.4	494.45	2714.66				0.165129	-0.28147	0.10757	-0.0717974	-0.190344	-0.00990187	-0.0468023	0.0698582				1423.88	1232.34	656.718	388.141	1194.16	364.69				-0.0587592	-0.150692
390.158	491.113	391.633	395.456	1070.34	1153.6				0.0477072	0.602569	0.504982	0.113686	0.590011	0.291899	0.120471				78.3479	108.555	244.01	1596.08	500.104	2723.91				0.128593	-0.204968	-0.0145821	-0.089104	-0.181085	-0.00652508	-0.0612787	0.0506637				1448.29	1360.41	653.41	389.465	1277.04	360.169				-0.0426202	-0.0624295
546.868	458.151	355.683	416.721	1146.28	1079.51				0.468528	0.495008	0.366832	0.173572	0.70282	0.208929	0.0863837				72.6186	108.248	238.732	1571.03	514.577	2758.4				0.0460627	-0.207217	-0.0358981	-0.103401	-0.157386	0.00605156	-0.075298	0.0399288				1486.74	1146.9	631.013	356.059	1270.02	379.123				-0.0172024	-0.209575
507.263	427.736	358.85	401.279	1014.99	1011.67				0.362175	0.39576	0.379001	0.130086	0.507783	0.132953	0.0617324				75.6867	99.4753	248.124	1669.01	503.757	2682.22				0.0902584	-0.271463	0.00202957	-0.0474793	-0.175104	-0.0217303	-0.0705814	0.0533355				1388.56	1293.92	708.308	394.635	1286.49	399.881				-0.0821052	-0.108255
538.158	405.377	345.533	403.044	1017.38	1058.14				0.445138	0.322801	0.327827	0.135056	0.511333	0.184999	0.0642261				73.9725	65.9505	258.814	1635.06	524.842	2713.88				0.0655655	-0.516992	0.0452032	-0.0668538	-0.140577	-0.0101849	-0.103973	0.0881467				1399.67	1290.74	706.372	384.282	1291.13	391.525				-0.0747612	-0.110446
459.316	426.849	416.725	367.103	1042.05	1072.18				0.23342	0.392866	0.601405	0.0338378	0.547982	0.200716	0.104183				74.2372	75.7129	212.113	1569.55	483.214	2602.95				0.0693785	-0.445494	-0.143395	-0.104246	-0.208743	-0.0506441	-0.147191	0.070912				1420.62	1329.14	710.782	366.318	1262.15	346.964				-0.0609117	-0.0839829
541.605	455.642	392.675	384.294	1133.89	1016.53				0.454395	0.48682	0.508985	0.0822518	0.684414	0.138396	0.0986974				71.2003	86.1188	279.515	1648.55	512.21	2578.93				0.0256323	-0.369283	0.128803	-0.0591603	-0.161263	-0.0594036	-0.0824457	0.0697299				1409.66	1305.41	699.641	382.123	1276.94	410.744				-0.0681588	-0.100334
470.316	462.83	404.042	331.647	1157.3	966.947				0.262959	0.510277	0.552665	-0.066013	0.719197	0.0828727	0.136604				76.2144	77.5842	268.639	1635.18	536.753	2714.52				0.0978598	-0.431789	0.0848799	-0.066787	-0.121074	-0.00995221	-0.0744769	0.0794061				1395.46	1306.37	626.692	387.841	1280.83	364.575				-0.0775424	-0.0996736
454.289	467.377	427.675	423.588	1165.37	1086.95				0.219922	0.525115	0.643484	0.192912	0.731172	0.217259	0.109632				75.7152	89.2574	220.505	1566.75	516.819	2710.34				0.0906689	-0.346296	-0.109506	-0.10584	-0.153715	-0.0114741	-0.106027	0.0599014				1422.15	1272	665.898	381.141	1275.6	376.114				-0.0599039	-0.123361
528.237	485.887	364.808	361.868	1153.71	1167.65				0.418496	0.585514	0.401898	0.0190942	0.713853	0.307636	0.117153				76.4784	76.6931	235.381	1561.18	538.8	2695.09				0.101663	-0.438315	-0.0494293	-0.10902	-0.117721	-0.0170392	-0.104977	0.0741196				1363.98	1313.21	621.949	392.224	1279.36	415.342				-0.0983572	-0.0949627
494.237	405.208	380.525	335.632	1068.54	1125.82				0.327195	0.322247	0.462295	-0.0547896	0.58733	0.260797	0.107667				74.7387	90.8614	233.196	1683.68	538.645	2732.84				0.0766025	-0.334549	-0.0582553	-0.0391114	-0.117976	-0.00326778	-0.0794261	0.0573853				1433.11	1352.95	664.872	371.171	1238.75	365.041				-0.0526567	-0.0675748
507.816	439.208	322.592	426.706	1110.48	1118.11				0.363659	0.433194	0.239667	0.201692	0.649631	0.252153	0.0797669				74.8185	94.9307	220.536	1636.25	531.877	2714.02				0.077752	-0.304746	-0.109381	-0.0661793	-0.129057	-0.0101346	-0.0902911	0.0526318				1353.82	1438.75	622	357.371	1288.06	376.087				-0.105072	-0.0084373
503.711	496.679	402.625	390.147	1205.87	1121.86				0.352635	0.620732	0.547221	0.0987351	0.791335	0.256357	0.118915				75.3911	70.6931	264.495	1548.79	538.447	2752				0.0860003	-0.482258	0.0681431	-0.11609	-0.118299	0.00371861	-0.0931308	0.085646				1455.85	1409.51	740.833	367.135	1331.87	367.374				-0.0376221	-0.0285935
443.711	475.509	397.308	379.971	1123.1	971.474				0.191514	0.551651	0.52679	0.070076	0.668382	0.0879417	0.114762				77.9255	92.9109	257.608	1539.01	563.572	2613.86				0.122508	-0.319539	0.040332	-0.121671	-0.0771579	-0.0466635	-0.067032	0.0618372				1438.98	1337.1	651.09	350.035	1303.1	370.123				-0.0487791	-0.0784978
493.947	470.981	340.733	409.191	1100.5	1138.14				0.326417	0.536875	0.309382	0.152367	0.634813	0.27459	0.0861677				74.8289	112.505	270.113	1605.26	547.803	2699.34				0.0779018	-0.176036	0.0908334	-0.0838638	-0.102979	-0.015486	-0.0349382	0.0431515				1476.57	1464.78	685.269	367.647	1314.25	374.964				-0.0239257	0.00950031
456.105	523.66	392.633	337.647	1125.72	1112.56				0.224799	0.708775	0.508825	-0.0491158	0.672277	0.245944	0.143677				77.7544	94.8218	291.082	1556.21	529.661	2655.41				0.120043	-0.305544	0.175516	-0.111858	-0.132686	-0.0315086	-0.047673	0.072122				1432.24	1426.92	637.372	394.959	1317.85	354.21				-0.0532291	-0.0165942
438.763	473.377	364.458	413.574	1127.76	1159.04				0.178229	0.544694	0.400553	0.164709	0.675302	0.297989	0.100251				73.1989	120.881	244.155	1583.35	556.207	2681.05				0.0544219	-0.11469	-0.0139994	-0.0963675	-0.0892177	-0.0221579	-0.0470017	0.0263274				1399.05	1438.59	680.5	350.577	1310.6	401.183				-0.0751724	-0.0085506
516.395	416.66	363.475	414.015	1146.41	1113.28				0.386696	0.359619	0.396774	0.165951	0.70302	0.24675	0.0861361				76.6706	91.1485	253.093	1516.53	515.65	2680.43				0.104431	-0.332446	0.0220969	-0.134501	-0.155629	-0.0223842	-0.0864054	0.0632275				1438.65	1307.3	684.769	398.9	1351.9	367.772				-0.0489967	-0.0990316
539.395	536.887	412.158	393.191	1073.21	1076.86				0.448459	0.751934	0.583856	0.107308	0.594269	0.205962	0.108677				76.7632	90.802	221.402	1590.87	586.563	2678.74				0.105765	-0.334984	-0.105884	-0.0920761	-0.039509	-0.0230005	-0.0816147	0.0592211				1472.56	1420.9	662.782	372.112	1231.1	390.183				-0.0265778	-0.0207387
441.132	522.434	388.7	469.029	1211.77	1128.16				0.184589	0.704773	0.49371	0.320884	0.800104	0.26341	0.114804				77.8044	90.0099	259.546	1621.65	551.537	2715.59				0.120764	-0.340785	0.0481593	-0.0745102	-0.0968653	-0.00956235	-0.0588	0.0651458				1434.22	1381.38	587.115	382.529	1251.29	392.064				-0.0519231	-0.0479756
500.553	462.17	378.65	432.103	1163.51	1082.07				0.344155	0.508122	0.455089	0.216891	0.728418	0.211797	0.0855752				75.7293	101.871	281.32	1578.47	553.924	2740.97				0.090872	-0.253915	0.136089	-0.0991544	-0.0929553	-0.000305893	-0.0365616	0.0582244				1403.93	1368.84	568.731	380.923	1236.58	378.831				-0.0719477	-0.0566234
424	523.245	379.142	437.544	1244.46	1129.35				0.138585	0.70742	0.456979	0.232215	0.848673	0.264746	0.135292				74.3757	97.3861	246.577	1615.38	566.876	2750.21				0.0713735	-0.286763	-0.00421545	-0.07809	-0.0717475	0.00306459	-0.061063	0.0504077				1432.67	1438.22	703.577	362.241	1304.12	392.475				-0.0529469	-0.00880546
460.368	457.943	414.008	413.176	1255.85	1141.6				0.236246	0.494331	0.590965	0.163591	0.865593	0.27846	0.12654				76.574	92.2673	245.948	1575.09	536.089	2771.57				0.10304	-0.324252	-0.00675482	-0.101081	-0.12216	0.0108558	-0.0733922	0.0602059				1399.73	1463.77	652.244	392.918	1361.52	397.703				-0.0747209	0.00880169
487.026	507.585	384.642	385.441	1156.28	1269.23				0.307832	0.656318	0.478114	0.0854823	0.717675	0.421393	0.115777				76.1852	77.2871	237.948	1609.73	539.569	2718.84				0.0974392	-0.433965	-0.0390622	-0.0813142	-0.116462	-0.0083739	-0.0969563	0.0737536				1343.59	1511.14	673.962	391.518	1258.12	383.986				-0.111836	0.0414482
478.026	565.906	385.692	471.485	1243.95	1175.74				0.283664	0.846626	0.482149	0.3278	0.847912	0.316693	0.122752				71.1181	98.0198	259.629	1564.16	563.796	2707.1				0.0244482	-0.282122	0.0484925	-0.107322	-0.0767905	-0.0126562	-0.0676584	0.0492109				1448.38	1600.4	702.628	410.565	1274.9	462.096				-0.0425637	0.102965
520.895	509.736	417.633	427.985	1175.09	1168.58				0.39878	0.663337	0.604896	0.205295	0.74561	0.308678	0.0980617				71.8809	81.4455	275.876	1534.17	535.427	2773.4				0.0354362	-0.403509	0.114106	-0.124436	-0.123244	0.0115224	-0.0816874	0.0748031				1388.83	1656.04	577.628	397.647	1309.25	411.767				-0.0819279	0.141313
604.842	460.755	397.117	379.868	1165.61	1201.07				0.624208	0.503505	0.526054	0.0697859	0.731534	0.345064	0.112785				74.5713	94.3861	224.237	1545.19	561.858	2694.83				0.0741911	-0.308735	-0.0944347	-0.118143	-0.0799638	-0.0171335	-0.0907032	0.0519688				1357.17	1510.41	636.718	391.688	1263.82	367.822				-0.102855	0.0409478
532.579	489.264	409.425	425.426	1302.32	1129.86				0.430156	0.596535	0.573353	0.198089	0.934615	0.265316	0.120163				75.0936	101.535	254.134	1520.56	532.265	2767.33				0.0817148	-0.25638	0.0263017	-0.132204	-0.128422	0.00930894	-0.0666134	0.0518113				1336.09	1590.45	644.782	391.188	1291.52	408.064				-0.116794	0.0961106
465.921	525.793	361.858	407.338	1216.09	1080.35				0.251157	0.715732	0.390562	0.147149	0.806517	0.209872	0.128795				72.1191	89.2673	282.918	1596.4	551.832	2789.48				0.0388675	-0.346224	0.142542	-0.0889187	-0.0963806	0.0173894	-0.0554541	0.068495				1413.4	1583.73	741.064	352.294	1280.86	404.685				-0.065684	0.0914753
516.605	498.208	405.858	358.088	1137.8	1080.53				0.387262	0.625719	0.559646	0.00845058	0.69023	0.210068	0.122356				73.1392	99.5446	226.629	1542.1	562.796	2786.34				0.0535619	-0.270955	-0.0847756	-0.119907	-0.078428	0.0162449	-0.0807099	0.0466121				1372.29	1575.36	652.398	385.877	1263.27	421.653				-0.0928592	0.0857069
558.789	501.472	379.325	413.279	1178.88	1113.49				0.500541	0.63637	0.457683	0.16388	0.751245	0.246985	0.0991133				73.4938	76.7723	266.907	1588.78	561.187	2694.88				0.0586699	-0.437735	0.0778854	-0.0932694	-0.0810635	-0.0171146	-0.0821045	0.0766456				1512.02	1598.59	694.628	393.035	1263.71	457.173				-0.000490928	0.101718
462.684	524.49	408.617	409.441	1104.6	1097.16				0.242465	0.711483	0.570246	0.153071	0.640899	0.228694	0.11171				74.7813	106.842	239.031	1591.08	540.078	2665.02				0.0772162	-0.217513	-0.034691	-0.0919575	-0.115628	-0.028006	-0.0684299	0.0404113				1429.76	1564.19	676.551	405.1	1241.61	478.616				-0.0548736	0.0780126
616.289	538.264	415.3	393.956	1166.79	1092.11				0.654948	0.756429	0.595929	0.109461	0.733292	0.223035	0.118618				74.6934	83.6238	228.175	1597.01	546.212	2764.24				0.07595	-0.387556	-0.0785306	-0.0885704	-0.105584	0.00818337	-0.0960179	0.064776				1430.85	1538.74	615.205	386	1317.33	437.384				-0.0541481	0.0604714
519.816	511.189	373.6	412.588	1140.37	1004.35				0.395883	0.668078	0.435683	0.161934	0.694034	0.12476	0.0977229				77.791	101.168	265.907	1588.57	561.843	2668.47				0.120571	-0.259063	0.0738469	-0.093388	-0.079988	-0.0267483	-0.0441284	0.0551529				1473.65	1583.58	614.513	383.412	1214.76	445.123				-0.0258603	0.0913713
410.789	598.038	399.117	444	1115.16	1137.05				0.10311	0.951478	0.533739	0.250396	0.656588	0.273371	0.149885				74.0379	90.0792	247.711	1512.26	535.138	2784.09				0.0665076	-0.340278	0.000364125	-0.13694	-0.123718	0.0154212	-0.0864404	0.0604641				1536.72	1462.05	658.449	437.094	1247.02	421.813				0.0158335	0.0076216
540.605	501.679	461.983	435.147	1002.28	1089.16				0.45171	0.637047	0.775325	0.225464	0.488906	0.219735	0.0925148				77.3891	122.376	277	1452.36	549.511	2740.67				0.114781	-0.103741	0.118644	-0.171123	-0.100182	-0.00041283	-0.0236722	0.0496558				1484.22	1547.29	820.269	412.7	1270.48	423.954				-0.0188711	0.0663626
453.737	512.623	415.375	446.809	1204.8	1109.23				0.218438	0.672757	0.596217	0.258306	0.789759	0.242211	0.114128				78.0718	91.2871	283.495	1486.87	563.569	2869.69				0.124615	-0.331431	0.144873	-0.15143	-0.0771624	0.0466428	-0.0406487	0.0747241				1455.22	1587.62	637.051	373.588	1259.63	442.434				-0.0380413	0.0941564
510.632	510.868	424.65	442.059	1095.07	1107.11				0.37122	0.667031	0.63186	0.244929	0.626751	0.239834	0.0844536				78.1533	109.871	243.268	1564.94	573.672	2708.67				0.125789	-0.195324	-0.0175798	-0.106877	-0.0606193	-0.012084	-0.0444492	0.0438455				1517.87	1471.92	656.256	352.259	1241.25	432.183				0.00337047	0.014419
479.816	496.925	387.533	405.515	1109.07	1043.91				0.288469	0.621532	0.489226	0.142013	0.647548	0.169065	0.0975155				74.519	101.158	254.093	1508.14	576.453	2760.84				0.0734378	-0.259136	0.0261353	-0.139289	-0.0560653	0.00694448	-0.0579955	0.0502128				1517.23	1555.56	617.756	441.194	1282.82	445.123				0.00295131	0.0720648
509.368	575.698	418.2	380.382	995.805	1195.86				0.367828	0.878581	0.607073	0.0712357	0.479286	0.339229	0.133169				78.1607	130.624	312.165	1577.45	596.711	2579.79				0.125896	-0.043337	0.260655	-0.0997325	-0.0228929	-0.0590892	0.0269166	0.0563573				1457.04	1442.48	742.551	415.412	1305.07	407.571				-0.0368401	-0.00586934
575.026	514	402.792	456.941	1017.37	1197.11				0.544142	0.677251	0.547862	0.286841	0.511315	0.340624	0.0633692				74.0845	93.6931	290.825	1544.96	565.297	2652.33				0.0671788	-0.31381	0.174474	-0.118277	-0.0743321	-0.0326342	-0.0495667	0.0681346				1479.21	1501.58	711.91	436.071	1261.48	479.265				-0.0221844	0.0348584
483.079	543.245	441.15	351.809	1069.28	1041.53				0.297232	0.772683	0.695266	-0.00923351	0.588435	0.166393	0.144204				76.4227	110.98	273.237	1568.75	591.165	2767.5				0.10086	-0.187203	0.103448	-0.104698	-0.0319742	0.00937182	-0.0183658	0.0468926				1580.77	1583.14	685.026	403.447	1256.15	420.416				0.0449516	0.0910693
533.605	539.151	420.8	460.691	1105.54	1114.11				0.432912	0.759322	0.617065	0.297402	0.642295	0.247673	0.0819594				77.1134	100.376	270.082	1510.34	552.77	2737.33				0.11081	-0.264864	0.0907086	-0.138037	-0.0948449	-0.00163276	-0.0496434	0.0588573				1531.51	1617.51	776.192	405.794	1252.95	462.991				0.0123913	0.114756
534.684	453.943	417.492	469.456	1000.66	1095.51				0.43581	0.481279	0.604352	0.322085	0.486496	0.226847	0.0455069				76.3734	110.752	238.01	1526.82	567.789	2779.91				0.10015	-0.188871	-0.0388127	-0.128631	-0.0702517	0.0138994	-0.0520861	0.0418749				1525.71	1591.16	741.013	419.582	1269.75	440.347				0.00855402	0.0966016
578.737	560.924	369.858	419.632	980.244	1112.54				0.554106	0.830372	0.421304	0.181772	0.45617	0.245924	0.105077				77.6763	120.693	228.577	1560.6	567.212	2783.29				0.118918	-0.116068	-0.0769071	-0.109353	-0.0711965	0.015132	-0.0399123	0.0370702				1545.24	1621.11	683.744	449.306	1247.67	458.699				0.0214685	0.117239
481.868	518.434	396.175	390.838	1075.89	1240.81				0.293981	0.69172	0.522435	0.100681	0.598254	0.389565	0.107622				72.26	115.604	239.165	1641.4	563.092	2746.34				0.0408971	-0.153339	-0.0341499	-0.0632368	-0.0779434	0.00165599	-0.047686	0.0275589				1573.67	1614.79	702.513	417.765	1217.25	444.772				0.0402598	0.112887
503.211	564.17	431.892	397.912	1020.78	1080.54				0.351292	0.840962	0.659688	0.120602	0.516388	0.210088	0.124108				74.5139	113.743	251.928	1583.01	574.83	2592.76				0.0733643	-0.166972	0.0173922	-0.0965603	-0.0587229	-0.0543605	-0.0476431	0.0344831				1587.43	1627.51	669.09	408.571	1278.02	431.018				0.0493532	0.121648
566.737	522.924	419.833	491.059	957.622	1178.14				0.521882	0.706373	0.61335	0.382923	0.422565	0.319385	0.0597046				76.05	117.772	278.381	1581.52	605.51	2724.14				0.0954917	-0.137459	0.124223	-0.0974126	-0.0084851	-0.00644335	-0.0050142	0.0419908				1521.05	1577.82	722.91	370.724	1266.08	481.31				0.00547456	0.0874062
574.342	455.642	420.358	439.824	1047.23	1090.98				0.542305	0.48682	0.615367	0.238634	0.555682	0.221778	0.0655502				76.6793	92.901	292.526	1490.65	587.713	2621.93				0.104557	-0.319611	0.181344	-0.149273	-0.0376258	-0.0437205	-0.044055	0.0730146				1568.71	1696.92	704.551	405.929	1199.65	477.32				0.0369788	0.169485
527.737	486.547	400.175	442.147	963.134	1172.67				0.417154	0.587669	0.537806	0.245178	0.430753	0.313255	0.0591044				73.9114	120.931	268.206	1531.01	605.878	2733.62				0.0646854	-0.114327	0.0831313	-0.126237	-0.00788103	-0.00298479	-0.017269	0.0357693				1660.61	1644.53	796.833	425.888	1211.55	450.16				0.0977299	0.133383
510.868	470.925	481.533	414.676	992.232	1119.86				0.371856	0.53669	0.850453	0.167815	0.473978	0.254117	0.111723				75.5448	113.594	253.32	1596.45	589.907	2685.71				0.0882143	-0.168059	0.0230128	-0.088889	-0.0340345	-0.0204601	-0.0333693	0.0362181				1597.96	1667.95	697.051	428.918	1200.23	443.064				0.0563182	0.149518
590.316	513.113	374.933	396.779	1011.4	1270.25				0.5852	0.674358	0.440807	0.117413	0.502457	0.422533	0.0951523				80.0342	121	276.082	1662.3	610.272	2796.91				0.152884	-0.11382	0.114939	-0.0513112	-0.000687213	0.0200997	0.0203507	0.0408623				1577.87	1707.11	653.602	413.606	1274.33	465.457				0.0430329	0.176509
596.184	445.415	395.6	398.676	940.634	1119.02				0.600958	0.45345	0.520225	0.122756	0.397329	0.253174	0.0814777				77.0456	114.267	310.918	1634.48	575.182	2742.74				0.109833	-0.163129	0.255618	-0.0671873	-0.0581454	0.000341819	0.0128885	0.0608038				1561.34	1655.27	662.654	420.012	1189.12	448.899				0.0321096	0.140785
529.289	568.038	402.917	373.235	982.415	1068.89				0.421323	0.853584	0.548342	0.051108	0.459395	0.197042	0.128681				81.3284	88.2376	271.588	1591.79	603.203	2728.21				0.171526	-0.353765	0.0967868	-0.0915499	-0.0122625	-0.00495933	-0.0323706	0.074433				1619.71	1630.64	683.295	408.965	1250.75	489.694				0.0706918	0.12381
470.395	510.698	489.008	406.029	902.085	1112.12				0.26317	0.666477	0.879178	0.143463	0.340064	0.245453	0.136318				79.9346	101.901	264.051	1637.17	591.108	2763.72				0.151449	-0.253697	0.0663528	-0.065653	-0.0320672	0.00799466	-0.0209368	0.0561172				1646.06	1677.71	676.795	440.912	1268.85	464.941				0.0881127	0.156249
568.974	505.264	404.825	445.985	1008.72	1105.26				0.527889	0.648745	0.555675	0.255987	0.498471	0.237771	0.0653882				79.4556	75.5347	268.495	1630.62	584.043	2765.74				0.144549	-0.446799	0.0842968	-0.0693886	-0.0436359	0.00873046	-0.0537078	0.085072				1581.62	1703.58	732.692	406.488	1180.26	499.059				0.0455158	0.174073
577.921	556.415	442.783	478.794	1028.38	1200.37				0.551916	0.815658	0.701543	0.348383	0.527674	0.344278	0.0797095				75.2647	117.386	290.412	1558.96	576.79	2711.74				0.0841795	-0.140287	0.172809	-0.110287	-0.0555121	-0.0109646	-0.0100103	0.0487831				1551.7	1658.16	677.09	391.988	1273.51	463.799				0.025733	0.142777
605.816	469.264	381.808	422.397	863.585	1179.95				0.626822	0.531272	0.467226	0.189558	0.282872	0.321409	0.0804034				76.3532	104.347	233.577	1666.87	601.895	2749.07				0.0998592	-0.235787	-0.056715	-0.0487022	-0.0144045	0.00264953	-0.0421833	0.0449791				1572.46	1653.75	736.731	406.729	1233.67	498				0.0394617	0.139737
658.789	391.057	369.517	421.059	909.707	1183.51				0.769075	0.27607	0.419992	0.185789	0.351387	0.325397	0.100056				80.9145	124.96	238.155	1610.21	601.931	2827.21				0.165564	-0.0848147	-0.0382299	-0.0810399	-0.0143447	0.0311483	-0.00361945	0.03818				1579.93	1756.89	659.808	391.5	1228.19	456.073				0.0443954	0.210817
666.079	517.604	402.525	430.368	903.049	1204.61				0.788649	0.689011	0.546837	0.212004	0.341495	0.349033	0.106791				79.4398	112.366	264.515	1576.61	579.413	2683				0.144321	-0.177051	0.0682267	-0.100214	-0.051217	-0.0214473	-0.022897	0.0471915				1513.85	1711.78	637.744	408.024	1206.71	472.753				0.000718247	0.179728
717.579	419.132	441.583	477.676	808.207	1119.16				0.926944	0.367685	0.696932	0.345236	0.200606	0.253331	0.132642				78.1117	113.663	221.649	1713.95	594.788	2733.34				0.12519	-0.167552	-0.104885	-0.0218345	-0.0260418	-0.00308541	-0.0330346	0.0405642				1540.5	1601.22	689.859	452.247	1218.83	438.292				0.0183326	0.103531
636.079	500.113	384.292	461.426	862.11	1026.14				0.708089	0.631937	0.476769	0.299473	0.280679	0.149162	0.0858594				79.6941	123.03	243.083	1659.14	599.896	2765.07				0.147985	-0.0989547	-0.0183289	-0.0531123	-0.0176773	0.00848511	-0.00526728	0.0341889				1480.21	1723.74	726.936	453.459	1215.97	444.265				-0.0215233	0.18797
565.947	549.396	402.833	468.809	930.085	1033.09				0.519762	0.792754	0.548022	0.320263	0.381659	0.156943	0.0818326				77.3767	93.6139	281.598	1564.47	600.787	2816.28				0.114603	-0.31439	0.137213	-0.107144	-0.016219	0.0271615	-0.0264628	0.0680885				1517.84	1640.74	715.154	446.188	1188.06	484.53				0.00335434	0.130768
581.342	392.925	411.592	437.868	869.756	984.281				0.561102	0.282166	0.581679	0.233126	0.292038	0.102284	0.0747833				78.4384	92.8119	235.464	1583.32	586.274	2643.03				0.129896	-0.320264	-0.0490961	-0.0963824	-0.0399824	-0.0360237	-0.068642	0.0593767				1559.35	1781.95	668.654	431.018	1215.27	448.968				0.0307956	0.228084
617.816	453.132	441.725	430.382	943.183	1113.07				0.659046	0.478631	0.697476	0.212046	0.401115	0.246514	0.088575				76.2174	95.7129	257.01	1631.03	634.923	2693.97				0.097903	-0.299018	0.0379175	-0.0691588	0.0396792	-0.0174479	-0.0350208	0.0576592				1604.68	1570.84	650.282	406.377	1218.91	415.895				0.0607601	0.0825914
533.263	454.491	415.225	433.926	945.293	1140.47				0.431994	0.483064	0.595641	0.222027	0.404249	0.277203	0.0608846				76.3217	137.158	260.268	1615.84	606.072	2771.31				0.0994055	0.00452109	0.0510734	-0.0778232	-0.00756467	0.0107615	0.0133956	0.0242647				1584.83	1726.77	633.744	428.494	1207.48	470.256				0.047636	0.190057
528.053	454.509	412.467	481.074	905.597	1188.42				0.418002	0.483126	0.585041	0.354803	0.345281	0.330898	0.0444821				81.2261	87.6139	223.103	1613.19	603.104	2702.79				0.170053	-0.358333	-0.0990143	-0.0793352	-0.0124239	-0.0142283	-0.065547	0.0702369				1573.18	1652.74	711.615	413.294	1230.12	482.749				0.0399374	0.139038
724.316	499.434	422.167	462.779	899.476	1002.63				0.945035	0.629721	0.622317	0.303283	0.336187	0.122835	0.116774				79.6149	89.9802	250.546	1533.38	607.328	2744.55				0.146844	-0.341003	0.0118135	-0.124888	-0.00550667	0.00100208	-0.0519564	0.0676799				1599.15	1695.55	686.077	411.635	1225.28	483.247				0.0571002	0.168541
548.211	473.472	372.492	400	921.805	1072.56				0.472132	0.545002	0.431424	0.126483	0.369358	0.201149	0.0715362				77.9601	127.812	208.784	1614.3	616.174	2681				0.123006	-0.0639308	-0.156843	-0.0787052	0.00897839	-0.0221767	-0.0316118	0.0385524				1526.6	1726.96	652.462	414.359	1285.17	491.128				0.00914248	0.190189
689.684	442.453	452.633	453.618	923.415	1312.19				0.852038	0.443783	0.739395	0.277481	0.371749	0.469509	0.110354				82.7206	101.713	262.258	1625.3	639.091	2678.05				0.191581	-0.255075	0.0591087	-0.0724274	0.0465034	-0.023252	-0.00892687	0.0613001				1646.76	1714.62	678.154	430.3	1168.17	516.279				0.0885722	0.181683
536.026	358.811	422.125	408.235	846.463	1105.18				0.439414	0.17085	0.622157	0.149675	0.257437	0.237673	0.089559				80.3391	108.267	275.433	1580.77	584.864	2707.5				0.157276	-0.207072	0.112316	-0.0978425	-0.0422927	-0.0125116	-0.0150211	0.054892				1525.12	1722.1	691.821	441.682	1248.08	455.913				0.00816705	0.186837
546.789	442.792	397.617	432.882	976.829	1240.6				0.468317	0.444891	0.527975	0.219087	0.451097	0.389329	0.0528773				77.4787	88.1089	252.649	1613.77	633.976	2717.24				0.116072	-0.354708	0.0203067	-0.0790091	0.0381278	-0.00895863	-0.0446949	0.0672045				1546.15	1675.15	706.91	371.429	1230.25	503.251				0.0220651	0.154483
566.816	381.943	437.792	453.853	862.427	1114.89				0.522094	0.246333	0.682361	0.278144	0.281151	0.248557	0.0857911				76.5938	118.356	238.021	1596.3	606.589	2764.93				0.103325	-0.133181	-0.0387711	-0.088978	-0.0067171	0.00843492	-0.0259812	0.0336153				1506.61	1667.86	646.333	429.153	1252.2	509.142				-0.00407026	0.149461
585.342	463.132	440.275	400.029	858.232	1058.75				0.571843	0.511263	0.691904	0.126566	0.274919	0.185686	0.102786				78.0889	108.168	263.113	1650.66	604.109	2705.48				0.124862	-0.207797	0.0625644	-0.0579521	-0.0107777	-0.0132473	-0.017058	0.0463999				1563.3	1687.14	658.731	433.771	1169.26	468.895				0.0334075	0.162744
599.263	394.302	404.175	424.882	870.463	1070.04				0.609226	0.28666	0.553178	0.196557	0.293089	0.198319	0.0812874				79.8531	105.485	218	1619.31	614.916	2641.22				0.150275	-0.227448	-0.119623	-0.0758443	0.00691827	-0.0366839	-0.050401	0.0518103				1541.21	1619.99	653.346	432.235	1197.56	471.922				0.0188001	0.116465
517.868	434.038	419.617	371.868	918.829	1184.77				0.390654	0.416324	0.612518	0.0472562	0.364937	0.326812	0.0909696				79.4841	117.535	254.608	1619.99	630.636	2699.98				0.144959	-0.139199	0.0282168	-0.0754588	0.0326601	-0.0152533	-0.00401247	0.0400344				1539.5	1688.93	683.038	433.8	1254.8	497.169				0.0176716	0.163981
548.237	450.113	422.817	406.103	925.39	1156.6				0.472203	0.46878	0.624815	0.14367	0.374684	0.295258	0.0791882				76.1037	100.267	230.856	1569.84	593.984	2666.38				0.0962652	-0.265662	-0.067706	-0.104076	-0.0273583	-0.0275092	-0.0660077	0.0485188				1551.27	1795.75	730.987	440.553	1248.79	534.922				0.0254509	0.237601
597.263	397.208	422.758	438.118	918.866	1220.88				0.603856	0.296142	0.62459	0.23383	0.364992	0.367246	0.0801799				80.6669	85.7327	206.577	1624.43	596.337	2690.9				0.161998	-0.372111	-0.165753	-0.072924	-0.0235058	-0.0185673	-0.0818104	0.0726271				1581.54	1739.32	689.628	423.135	1209.8	508.498				0.0454594	0.198704
617.711	385.849	423.717	479.471	855.378	1204.82				0.658764	0.259078	0.628273	0.350289	0.27068	0.349269	0.0873321				82.0755	100.624	266.959	1564.79	619.255	2801.95				0.182288	-0.263051	0.0780938	-0.106959	0.0140237	0.0219359	-0.0122781	0.0631762				1490.85	1746.26	603.526	442.877	1181.68	498.845				-0.0144857	0.203491
545.368	400.34	469.058	398.191	955.854	1212.19				0.4645	0.306362	0.802513	0.121389	0.419938	0.35752	0.111878				80.1453	115.129	256.845	1563.96	594.923	2691.74				0.154484	-0.15682	0.0372515	-0.107433	-0.0258204	-0.0182591	-0.0194329	0.0447667				1470.57	1653.63	631.962	430.918	1284.4	520.881				-0.0278919	0.139652
633.342	382.132	418	403.25	888.22	1178.25				0.70074	0.246949	0.606305	0.135636	0.319466	0.319503	0.107886				74.0017	129.277	256.412	1571.61	626.966	2709.71				0.0659861	-0.0531993	0.0355029	-0.103068	0.02665	-0.0117067	-0.00663913	0.0255933				1520.44	1642.44	694.808	379.071	1148.11	491.21				0.00507146	0.131939
495.974	400.736	431.342	416.632	942.927	1118.4				0.331859	0.307655	0.657575	0.173323	0.400735	0.252487	0.079868				77.6109	110.099	281.423	1561.35	615.796	2672				0.117976	-0.193657	0.136505	-0.108923	0.00835893	-0.0254593	-0.0108664	0.0522586				1572.21	1717.64	706.615	462.035	1239.82	481.16				0.0392924	0.183769
439.421	399.113	459.508	402.529	994.939	1026.19				0.179996	0.30236	0.765814	0.133606	0.478	0.149221	0.115081				78.7051	103.842	271.051	1647.16	606.782	2715.81				0.133738	-0.239485	0.0946218	-0.0599533	-0.00640074	-0.00948062	-0.0144932	0.0537454				1560.29	1724.23	691.308	428.324	1081.6	486.018				0.0314164	0.18831
457.684	435.208	403.442	432.559	888.634	1143.81				0.229038	0.420141	0.55036	0.218175	0.320082	0.280936	0.0624254				81.2301	118.713	265.32	1634.49	627.895	2700.83				0.17011	-0.13057	0.071474	-0.0671799	0.0281702	-0.0149452	0.00950991	0.0432366				1538.72	1703.92	612.551	419.547	1243.3	493.822				0.0171556	0.174309
506.395	375.906	468.692	417.882	956.097	1118.11				0.359843	0.226631	0.801105	0.176843	0.4203	0.252153	0.110163				79.4854	88.7426	206.052	1637.18	615.146	2684.36				0.144978	-0.350067	-0.167876	-0.0656456	0.0072944	-0.0209505	-0.0753777	0.0689102				1541.17	1794.64	702.423	441.471	1149.19	523.918				0.018776	0.236836
536.053	382.981	426.408	397.824	922.403	1100.46				0.439484	0.249719	0.638617	0.120353	0.370246	0.232388	0.0876283				77.9182	107.97	249.134	1561.62	600.213	2779.03				0.122403	-0.209247	0.0061096	-0.108767	-0.0171572	0.0135787	-0.0321801	0.0465116				1466.09	1667.11	639.808	419.106	1149.27	520.087				-0.0308585	0.148942
401.158	444.792	392.033	443.912	917.72	1178.33				0.077246	0.451418	0.506519	0.250148	0.363289	0.319601	0.0765735				72.8937	109.99	239.66	1636.57	629.577	2623.26				0.0500255	-0.194454	-0.0321513	-0.065994	0.0309252	-0.0432364	-0.0424809	0.0354504				1496.9	1755.88	596.577	411.106	1190.77	509.114				-0.0104871	0.210118
405.947	418.472	372.392	399.118	973.89	1191.58				0.0901074	0.36553	0.43104	0.123998	0.446732	0.334435	0.0767022				78.5609	105.208	236.371	1576.87	612.745	2722.67				0.131661	-0.229478	-0.0454325	-0.100066	0.0033623	-0.00697785	-0.0411552	0.0489794				1547.45	1687.45	686.821	428.006	1196.62	561.288				0.0229276	0.162961
412.263	405	433.408	462.794	899.037	1205.23				0.107068	0.32157	0.665516	0.303324	0.335535	0.34972	0.0899181				82.3026	116.406	254.33	1590.13	596.63	2714.84				0.18556	-0.147466	0.0270929	-0.0924986	-0.0230257	-0.0098328	-0.0100284	0.0467233				1452.35	1700.11	639.436	415.418	1218.17	508.598				-0.0399357	0.171685
481.579	433.868	371.275	426.765	922.537	964.614				0.293204	0.41577	0.426748	0.201858	0.370445	0.0802596	0.0421031				78.3613	102.693	244.598	1524.84	606.747	2691.69				0.128786	-0.247896	-0.0122091	-0.129758	-0.00645821	-0.018278	-0.0476356	0.0522128				1482.24	1672.34	611.372	416.482	1222.93	492.899				-0.020177	0.152548
420.395	417.396	414.483	423.662	944.988	1136.74				0.128903	0.36202	0.592791	0.193119	0.403796	0.273018	0.0820118				82.5797	120.158	258.546	1518.65	640.945	2740.66				0.189551	-0.119984	0.0441209	-0.133293	0.0495395	-0.000419067	0.0049193	0.0491082				1432.7	1720.95	587.821	412.153	1250.36	451.374				-0.0529308	0.186044
423.368	374.377	392.383	415.382	942.561	1144.07				0.136889	0.221644	0.507864	0.169803	0.400191	0.28123	0.0714608				77.9738	105.624	259.742	1625.91	594.213	2687.52				0.123204	-0.226432	0.0489504	-0.0720791	-0.0269822	-0.0197997	-0.0288565	0.0483619				1507.84	1723.84	737.744	389.341	1185.03	531.123				-0.00325606	0.188036
382.5	417.038	402.658	433.206	950.39	1186.49				0.0271432	0.360851	0.547349	0.219998	0.411822	0.328737	0.0886954				80.1147	90.5545	271.227	1647.87	622.527	2697.83				0.154043	-0.336797	0.0953298	-0.0595457	0.0193809	-0.0160393	-0.023938	0.0699975				1504.34	1638.42	590.333	424.359	1169.94	515.137				-0.0055697	0.129173
524.053	374.547	438.5	418.647	984.939	1092.25				0.40726	0.222198	0.685083	0.178997	0.463145	0.223193	0.0909376				78.055	106.059	242.876	1551.82	602.699	2700.71				0.124373	-0.223242	-0.0191617	-0.114363	-0.0130878	-0.0149892	-0.0434117	0.0475536				1375.1	1680.45	641.115	439.9	1174.6	482.881				-0.0910051	0.158137
584.105	415.83	433.725	397.485	905.829	1247.96				0.568522	0.35691	0.666733	0.119401	0.345626	0.397581	0.0955095				77.1707	109.644	276.051	1505.75	616.776	2737.84				0.111635	-0.196992	0.114814	-0.140653	0.00996318	-0.00144416	-0.0171128	0.0524652				1412.35	1697.22	738.705	418.629	1226.07	539.146				-0.0663773	0.169693
609.737	328.962	412.508	431.088	935.671	1147.86				0.637352	0.0734481	0.585201	0.214034	0.389956	0.285474	0.107228				76.7467	121.445	272.773	1540.79	621.472	2701.59				0.105528	-0.110557	0.101575	-0.120656	0.0176527	-0.0146685	-0.0035211	0.0402851				1466.78	1748.52	644.731	385.741	1147.68	478.429				-0.030399	0.205049
465.316	399.396	389.367	418.676	970.61	1180.23				0.249532	0.303284	0.496272	0.17908	0.441858	0.321723	0.0591795				79.0346	104.485	228.753	1606.4	596.876	2669.17				0.138484	-0.234772	-0.0761992	-0.0832116	-0.0226228	-0.0264905	-0.0508019	0.0492459				1471.57	1691.37	577.102	430.641	1182.03	545.585				-0.0272309	0.165661
487.947	378.321	434.083	448.603	1058.67	1153.63				0.310305	0.234512	0.66811	0.263359	0.572675	0.291938	0.0881256				80.1047	112.337	255.01	1593.51	625.488	2743.26				0.153899	-0.177269	0.0298406	-0.0905715	0.0242293	0.000530381	-0.00989016	0.0462613				1514.44	1649.93	702.359	428.582	1204.12	520.137				0.00110522	0.137103
436.447	369.226	425.058	417.471	854.122	1163.23				0.17201	0.204836	0.633429	0.175684	0.268813	0.302685	0.0873586				82.2721	100	211.216	1519.9	604.512	2833.48				0.18512	-0.26762	-0.147017	-0.132582	-0.0101183	0.0334373	-0.0564633	0.0651085				1524.62	1618.19	616.333	388.153	1235.71	535.338				0.00783653	0.115228
474.711	404.868	395.075	419.029	981.72	1130.63				0.27476	0.321139	0.518208	0.180074	0.458362	0.266181	0.0614019				79.0607	104.535	231.969	1612.3	606.961	2693.21				0.13886	-0.234408	-0.0632096	-0.0798466	-0.00610861	-0.0177246	-0.0437396	0.0494884				1534.78	1695.48	572.295	411.565	1219.18	521.868				0.0145518	0.168494
550.132	361.491	378.15	452.515	1008.17	1148.82				0.477291	0.179593	0.453168	0.274375	0.497656	0.286555	0.0632129				80.1322	130.812	254.216	1520.64	580.038	2724.84				0.154295	-0.0419594	0.0266349	-0.132159	-0.0501947	-0.00618556	-0.00826144	0.0391115				1570.2	1676.75	616.962	398.859	1167.61	493.279				0.0379622	0.155588
509.316	429.566	402.967	397.838	925.793	1169.12				0.367687	0.401732	0.548534	0.120395	0.375282	0.309287	0.0689031				81.261	102.614	261.34	1475.29	611.512	2611.83				0.170556	-0.248476	0.0554034	-0.158041	0.00134409	-0.0474055	-0.0377699	0.0612551				1519.06	1707.99	603.744	455.159	1210.45	546.406				0.00416055	0.177113
467.105	381.472	451.867	450.221	940.244	1089.88				0.254337	0.244794	0.736449	0.267915	0.396749	0.22054	0.0932661				77.7155	109.376	242.814	1588.95	610.478	2646.02				0.119483	-0.19895	-0.0194117	-0.0931731	-0.00034858	-0.0349358	-0.0378894	0.0430203				1600.26	1695.75	602.205	382.365	1208.38	484.183				0.0578338	0.168682
499.5	450.358	438.95	423.971	988.39	1172.81				0.341328	0.469581	0.686812	0.193989	0.468272	0.313412	0.0814026				79.1406	106.901	219.649	1595.77	625.508	2788.22				0.140011	-0.217078	-0.112961	-0.0892819	0.0242624	0.0169304	-0.0396862	0.051278				1553.67	1647.74	594.321	395.606	1200.39	453.694				0.027039	0.135592
369.132	385.075	407.008	399.103	917.671	1184.77				-0.00875557	0.256553	0.564066	0.123956	0.363216	0.326812	0.0984527				80.06	139.782	266.423	1637.01	642.058	2668.02				0.153255	0.0237373	0.0759288	-0.065742	0.0513628	-0.0269118	0.0352717	0.0316416				1565.71	1705.81	652.064	387.806	1207.79	532.927				0.0349956	0.175612
540.579	376.509	428.392	424.074	930.39	1144.18				0.451639	0.228601	0.646238	0.194279	0.382112	0.281348	0.0816798				77.3861	124.356	238.01	1514.97	597.996	2658.93				0.114738	-0.0892382	-0.0388127	-0.135391	-0.0207884	-0.0302258	-0.0332863	0.0344786				1545.44	1732.16	660.577	422.3	1148.24	503.74				0.0215975	0.193776
389.658	371.755	422.983	434.765	944.463	1221.82				0.0463646	0.213086	0.625455	0.224387	0.403017	0.368307	0.0985153				75.8514	90.9505	260.093	1567.36	639.942	2643.14				0.0926308	-0.333896	0.0503659	-0.105491	0.0478976	-0.0359859	-0.0474133	0.0642478				1566.84	1715.92	573.949	374.577	1229.13	512.831				0.0357453	0.182579
379.105	483.66	440.575	478.632	939.195	1161.12				0.0180272	0.578249	0.693057	0.347928	0.395191	0.300327	0.115343				77.3858	119.564	289.804	1601.51	596.258	2697.67				0.114734	-0.124334	0.170353	-0.0860058	-0.0236342	-0.0160959	0.00583612	0.0467807				1537.01	1789.71	602.628	412.618	1185.44	474.703				0.016027	0.233437
396.026	413.302	351.017	430.588	885.512	1146.05				0.0634659	0.34866	0.348899	0.212626	0.315444	0.28345	0.0546278				78.4904	126.297	258.278	1621.74	597.116	2703.52				0.130645	-0.0750257	0.0430386	-0.0744583	-0.022229	-0.0139642	-0.00199887	0.0320201				1540	1703.97	680.756	447.871	1151.98	555.973				0.0180021	0.174347
520.5	406.396	413.5	428.794	958.159	1121.05				0.39772	0.326126	0.589012	0.207573	0.423362	0.255453	0.0625021				78.3184	142.238	268.763	1662.82	600.341	2676.59				0.128168	0.0417202	0.0853795	-0.0510147	-0.0169493	-0.0237866	0.0272528	0.028552				1579.38	1740.25	591.321	430.018	1163.05	468.616				0.0440326	0.199346
414.105	378.792	419.958	445.926	869.195	1161.4				0.112014	0.236051	0.61383	0.255821	0.291205	0.300642	0.0836453				76.0617	113.842	240.763	1669.87	624.884	2657.74				0.0956602	-0.166247	-0.0276965	-0.0469901	0.0232401	-0.0306597	-0.0254488	0.0352884				1538.56	1788.85	621.423	385.053	1163.47	492.205				0.0170508	0.232843
379.947	349.679	454.383	412.794	976.915	1148.61				0.0202885	0.141051	0.74612	0.162514	0.451224	0.286319	0.131188				79.8819	144.911	249.278	1584.23	593.655	2692.16				0.15069	0.0612989	0.00669274	-0.0958635	-0.0278961	-0.0181081	0.0128023	0.0345554				1536	1671.7	592.564	373.4	1202.47	493				0.0153579	0.152104
389.368	397.943	405.325	457.75	957.256	1079.7				0.0455872	0.298543	0.557597	0.289119	0.422021	0.209145	0.0847183				74.0859	140.317	250.526	1547.75	595.968	2685.55				0.067199	0.0276526	0.0117303	-0.116683	-0.0241098	-0.0205166	-0.00912131	0.0255186				1560.06	1738.53	604.872	374.059	1195.22	504.964				0.0312632	0.198166
415.289	464.906	445.675	432.956	830.134	1041.05				0.115194	0.51705	0.712655	0.219294	0.233179	0.165862	0.110644				80.2848	129.099	293.969	1619.61	630.143	2688.52				0.156493	-0.0545044	0.187173	-0.0756738	0.0318523	-0.019435	0.0376509	0.0451324				1623.27	1716.68	593.808	421.394	1152.9	468.562				0.0730458	0.183108
551.368	465.868	392.792	441.044	872.963	1151.84				0.480612	0.52019	0.509434	0.242072	0.296803	0.289934	0.0583217				73.9175	136.951	288.959	1551.71	627.231	2674.34				0.0647732	0.00299847	0.166939	-0.114423	0.0270838	-0.0246041	0.0204613	0.0382939				1547.29	1622.42	525.821	422.577	1165.92	487.932				0.0228228	0.118146
524.237	440.66	396.017	459.735	837.28	1142.49				0.407755	0.437934	0.521827	0.29471	0.243795	0.279462	0.0500302				75.0523	164.752	240.464	1654.99	625.472	2719.28				0.0811199	0.206615	-0.028904	-0.055484	0.0242026	-0.00821663	0.0365555	0.0390809				1596.07	1707.89	640.282	387.482	1152.72	475.575				0.0550687	0.177047
462.237	403.585	466.558	471.412	814.378	1157.96				0.241264	0.316952	0.792906	0.327593	0.209773	0.296791	0.106163				77.3116	122.535	297.629	1565.22	600.88	2644.1				0.113665	-0.10258	0.201953	-0.106714	-0.0160663	-0.0356338	0.00910384	0.0505456				1523.4	1734.49	562.423	377.841	1157.42	492.128				0.00703045	0.195381
478.684	416.698	421.692	448.647	856.659	1238.05				0.285431	0.359742	0.620491	0.263483	0.272582	0.38648	0.067221				77.4743	138.604	207.196	1564.61	612.546	2662.67				0.116009	0.0151084	-0.163254	-0.107063	0.00303709	-0.0288613	-0.0275041	0.0400433				1565.68	1724.04	572.09	376.682	1210.24	504.927				0.0349796	0.188178
573.447	483.642	469.267	427.029	936.268	1238.35				0.539902	0.578187	0.803314	0.202603	0.390843	0.386814	0.100005				79.3673	120.941	259.062	1564.64	615.8	2679.53				0.143277	-0.114255	0.0462027	-0.107048	0.00836548	-0.0227113	-0.00769482	0.0397521				1623.55	1568.01	569.487	424.729	1185.24	484.685				0.0732312	0.0806466
580.658	361.604	398.683	414.544	840.915	1225.23				0.559265	0.179962	0.532074	0.167442	0.249194	0.372118	0.0861901				81.2224	126.723	263.134	1674.36	604.255	2643.36				0.169999	-0.0719072	0.0626476	-0.0444256	-0.0105387	-0.0359042	0.0116452	0.0367674				1587.95	1745.44	596.256	409.165	1213.42	493.47				0.0496997	0.202924
627.053	414.34	446.792	466.279	884.988	1090.93				0.68385	0.352046	0.716947	0.313139	0.314665	0.221719	0.0919712				82.4955	151.089	175.732	1641.78	612.438	2673.21				0.188338	0.106547	-0.290319	-0.0630218	0.00286008	-0.0250191	-0.0134358	0.0669904				1622.26	1702.51	639.013	385.453	1201.09	516.26				0.0723767	0.173337
506.421	406.623	369.183	451.456	909.89	1197.26				0.359914	0.326865	0.41871	0.271393	0.351658	0.340801	0.023921				77.528	152.465	226.299	1553.16	607.932	2720.84				0.116782	0.116626	-0.0861079	-0.1136	-0.00451763	-0.00764446	0.00358966	0.0398165				1560.61	1658.66	538.295	435.171	1222.21	490.822				0.0316259	0.143117
484.316	421.962	434.4	432.441	927.293	1270.18				0.300553	0.37692	0.669327	0.217844	0.37751	0.422454	0.0761502				79.0443	120.208	236.66	1602.66	609.963	2620.55				0.138624	-0.119621	-0.0442666	-0.0853462	-0.00119172	-0.0442236	-0.0260041	0.036819				1590.55	1647	555.949	402.365	1169.19	502.822				0.0514169	0.135082
526.921	489.189	436.758	519.353	850.72	1140.28				0.414963	0.596289	0.67839	0.462606	0.263759	0.276987	0.0721536				78.3126	123.535	221.856	1522.79	613.528	2725.34				0.128084	-0.0952562	-0.104052	-0.130929	0.00464576	-0.0060032	-0.0339184	0.0394138				1640.38	1678.36	561.385	397.253	1144.01	510.831				0.084356	0.156693
565.421	401.208	427.975	387.75	870.5	1145.86				0.518349	0.309195	0.644637	0.0919844	0.293143	0.283234	0.0959998				78.4703	106.327	260.907	1587.58	599.305	2724.24				0.130356	-0.221284	0.0536548	-0.0939513	-0.0186442	-0.00640556	-0.0260458	0.04966				1558.54	1754.26	603.218	372.365	1139.44	505.516				0.0302555	0.209004
369.526	375.491	407.575	488.368	909.024	1130.96				-0.00769567	0.225277	0.566243	0.375344	0.350372	0.266554	0.0946947				78.6629	109.663	260.887	1614.04	619.455	2716.41				0.13313	-0.196847	0.0535716	-0.0788535	0.0143512	-0.00926051	-0.0139847	0.0464322				1570.28	1782.34	588.744	382.635	1189.55	518.817				0.0380187	0.228358
434.368	432.208	390.983	429.588	851.195	1243.54				0.166428	0.410352	0.502484	0.209809	0.264466	0.39263	0.0631833				76.7497	87.9802	231.588	1567.08	627.997	2759.6				0.105571	-0.35565	-0.0647503	-0.105655	0.0283384	0.00649178	-0.0642757	0.0655858				1610.77	1727.79	551.5	408.371	1151.26	441.361				0.0647828	0.190765
534.711	425.396	412.625	410.118	918.232	1278.6				0.43588	0.388125	0.58565	0.154976	0.36405	0.431885	0.0693563				77.9654	152.624	259.918	1632.78	591.43	2743.31				0.123083	0.117787	0.049658	-0.0681582	-0.0315406	0.000549273	0.0318963	0.0321587				1583.18	1727.22	463.5	418.018	1187.85	490.744				0.0465478	0.190368
404.289	437.208	457.3	419.059	931.988	1064.07				0.0856554	0.426667	0.757328	0.180156	0.384485	0.191639	0.116251				73.5981	111.931	255.32	1575.88	599.149	2695.48				0.0601723	-0.180242	0.0310897	-0.100629	-0.018901	-0.0168946	-0.0375674	0.0362286				1590.65	1670.64	585.564	435.106	1173.56	545.785				0.0514814	0.151377
427.526	387.849	425.483	447.029	851.561	1310.82				0.148054	0.265604	0.635062	0.258927	0.265009	0.467977	0.0831843				74.005	106.396	214.227	1573.44	586.191	2679.5				0.0660337	-0.220777	-0.134861	-0.102023	-0.0401196	-0.0227238	-0.075745	0.0405795				1629.6	1666.07	482.141	405.818	1143.7	517.585				0.0772296	0.148224
448.342	408.34	411.508	379.382	852.549	1244.82				0.203952	0.332467	0.581358	0.0684195	0.266477	0.394064	0.0847783				73.3257	117.792	251.433	1554.34	615.846	2729.05				0.0562484	-0.137314	0.0153939	-0.112926	0.00844064	-0.00465113	-0.0291346	0.031627				1583.45	1702.47	528.885	438.982	1190.48	469.484				0.0467251	0.173308
428.263	511.057	415.9	416.809	911.915	1327.72				0.150033	0.667647	0.598235	0.17382	0.354666	0.486897	0.106304				73.7175	103.445	229.701	1589.56	619.928	2602.67				0.0618923	-0.242386	-0.0723692	-0.0928247	0.0151257	-0.0507447	-0.063551	0.04282				1583.09	1824.34	622.872	374.871	1124.6	489.274				0.0464832	0.257304
506.632	416.623	479.9	423.838	968.695	1208.91				0.360479	0.359496	0.844176	0.193616	0.439014	0.353846	0.108827				78.8242	107.089	174.67	1568.21	618.497	2763.31				0.135454	-0.215701	-0.294607	-0.10501	0.0127823	0.00784374	-0.0765397	0.065261				1610.29	1656.52	689.795	401.253	1157.56	499.712				0.0644684	0.141644
428.395	425.698	423.717	436.044	819.793	1132.6				0.150386	0.38911	0.628273	0.227991	0.217817	0.268381	0.0858626				78.211	99.4554	266.351	1536.05	610.743	2754.38				0.126621	-0.271608	0.0756372	-0.123361	8.50266e-05	0.00458643	-0.0313401	0.0591244				1617.52	1730.78	647.744	396.535	1201.21	477.904				0.0692488	0.192823
456.289	420.736	421.833	391.147	895.11	1159.33				0.225293	0.372918	0.621036	0.101551	0.329702	0.298323	0.0865147				76.4032	110.307	243.588	1546.65	639.212	2672.38				0.100579	-0.192134	-0.0162891	-0.117313	0.0467027	-0.0253209	-0.0339625	0.0435741				1598.9	1611.73	545.026	409.276	1232.15	523.909				0.056939	0.110772
399.342	433.962	385.575	429.515	833.854	1198.77				0.0723699	0.416077	0.481701	0.209602	0.238705	0.34249	0.0737914				72.3126	127.386	266.34	1660.77	596.755	2704.4				0.0416548	-0.0670493	0.0755956	-0.0521858	-0.0228198	-0.0136435	-0.006408	0.0224568				1613.21	1686.55	518.872	418.129	1141.91	502.47				0.066395	0.162338
430.579	499.774	391.325	362.412	780.707	1324.05				0.156251	0.630829	0.503797	0.0206267	0.159755	0.482791	0.116017				75.3351	103.267	246.732	1586.51	599.018	2690.33				0.0851936	-0.243691	-0.00359071	-0.0945665	-0.0191155	-0.0187748	-0.0490907	0.0454083				1598.68	1627.19	549.731	384.465	1204.87	478.42				0.0567939	0.121431
519.789	463.491	412.608	464.529	864.549	1237.4				0.395812	0.512432	0.585585	0.308211	0.284303	0.385753	0.0580605				73.4123	92.5446	207.722	1657.36	595.33	2692.19				0.0574959	-0.322222	-0.161131	-0.0541277	-0.0251544	-0.0180956	-0.0872058	0.0551836				1651.09	1723.01	520.679	431.412	1112.23	492.338				0.0914339	0.18747
465.553	614.415	396.692	426.5	837.561	1251.54				0.250168	1.00492	0.524421	0.201112	0.244212	0.401589	0.151257				71.5723	130.97	269.155	1569.77	600.565	2718.5				0.0309909	-0.0407993	0.0869613	-0.10412	-0.0165818	-0.00849962	-0.00867481	0.0264096				1621.43	1641.59	662.115	379.235	1176.5	484.726				0.0718285	0.131353
527.368	470.679	437.125	449.794	821.134	1326.11				0.416164	0.53589	0.679799	0.266713	0.21981	0.485089	0.0849842				73.3717	124.148	239.897	1524.01	624.438	2706.17				0.056911	-0.0907609	-0.0311938	-0.130232	0.0225099	-0.0129958	-0.0309603	0.0284805				1524.72	1620.48	464.795	404.606	1154.28	485.292				0.00790104	0.116805
419.763	490.132	401.233	389.647	888.915	1315.65				0.127208	0.599367	0.541873	0.097327	0.320499	0.47338	0.103087				71.9671	97.4158	239.567	1597.71	590.918	2707.55				0.0366779	-0.286546	-0.032526	-0.0881701	-0.0323793	-0.0124927	-0.0692394	0.0464491				1556.72	1703.55	489.154	402.4	1165.95	483.283				0.0290543	0.174054
427.342	509.434	410.725	418.368	897.524	1252.04				0.14756	0.662352	0.578348	0.17821	0.333289	0.402139	0.103922				76.2496	122.228	275.237	1605.53	597.251	2678.05				0.0983669	-0.104828	0.111525	-0.0837082	-0.0220078	-0.023252	-0.00398408	0.0369863				1612.63	1773.36	497.051	424.082	1176.47	479.53				0.0660162	0.222165
495.789	451.585	366.525	420.103	918.915	1211.04				0.331364	0.473582	0.408495	0.183097	0.365064	0.356223	0.0485274				72.8591	127.752	238.464	1583.13	581.411	2751.66				0.0495271	-0.0643659	-0.0369808	-0.0964935	-0.0479464	0.00359289	-0.0321111	0.0211341				1514.23	1587.23	520.756	390.447	1151.14	507.333				0.000968186	0.0938921
430.053	545.641	410.642	470.221	874.293	1254.05				0.154838	0.780502	0.578028	0.324239	0.298778	0.404398	0.111545				72.4663	103.881	246.206	1508.56	611.159	2737.5				0.0438689	-0.239195	-0.00571411	-0.139052	0.000766713	-0.00156988	-0.0568158	0.0444002				1624.49	1762.42	581.115	397.5	1134.34	468.667				0.0738519	0.214631
418.947	488.981	414.825	481.632	815.646	1124				0.125017	0.595611	0.594104	0.356377	0.211657	0.258754	0.0964839				77.5887	123.515	245.381	1577.99	605.995	2777.12				0.117656	-0.0954012	-0.00904501	-0.0994286	-0.00769075	0.0128807	-0.0135047	0.0326818				1577	1708.1	499.833	373.465	1175.97	467.895				0.0424606	0.177189
512.447	416.226	420.133	446	935.61	1362.4				0.376096	0.358203	0.614503	0.256028	0.389865	0.525739	0.0588025				75.1526	98.9505	198.856	1655.78	597.303	2709.12				0.0825647	-0.275306	-0.196936	-0.0550319	-0.0219236	-0.0119205	-0.0797588	0.0538134				1580.33	1836.78	527	409.871	1195.51	500.32				0.0446613	0.265876
443.684	499.038	441.017	461.338	881.5	1280.19				0.191444	0.628428	0.694754	0.299224	0.309484	0.433673	0.099464				77.3046	114.317	254.299	1618.22	597.404	2703.48				0.113564	-0.162766	0.0269681	-0.0764668	-0.0217576	-0.0139768	-0.0224059	0.0381317				1621.35	1733.11	560.564	378.706	1192.19	532.749				0.0717801	0.194428
549.316	411.755	447	463.882	886.037	1285.07				0.475101	0.343611	0.717747	0.306389	0.316223	0.439135	0.0776221				74.158	93.4753	230.691	1709.26	618.632	2783.48				0.0682376	-0.315405	-0.0683723	-0.0245101	0.0130035	0.0152011	-0.0519743	0.0558583				1583.54	1761.04	529.09	400.065	1144.56	506.036				0.0467815	0.213678
491.711	476.717	377.475	425.029	908.268	1218				0.320411	0.555592	0.450574	0.196971	0.349249	0.364024	0.0606883				75.8584	118.545	262.876	1610.22	615.657	2736.48				0.0927317	-0.131803	0.0616069	-0.0810325	0.00813083	-0.00194091	-0.00871779	0.0346153				1610.88	1696.29	497.551	440.029	1150.35	458.151				0.0648554	0.169051
402.395	473.472	430.767	389.059	934.878	1235.19				0.0805672	0.545002	0.655365	0.0956702	0.388778	0.383278	0.116191				76.1043	119.723	259.814	1616.45	591.18	2710.66				0.0962738	-0.123174	0.0492416	-0.0774748	-0.03195	-0.0113608	-0.0164073	0.0328645				1700.9	1725.51	511.064	413.265	1179.01	473.046				0.124365	0.189188
396.211	488.151	420.142	463.912	858.659	1260.3				0.0639605	0.592902	0.614535	0.306472	0.275553	0.411393	0.103946				72.0839	134.644	241.083	1641.73	594.495	2778.79				0.0383604	-0.0138968	-0.0264058	-0.0630515	-0.0265219	0.0134907	-0.0130041	0.0143854				1530.2	1728.84	541.846	410.382	1190.12	470.598				0.0115206	0.191482
507.763	483.981	401.542	463.441	890.293	1213.04				0.363518	0.579296	0.543058	0.305146	0.322546	0.358463	0.0576023				78.1687	103.931	248.474	1678.71	620.27	2709.78				0.126011	-0.238832	0.00344504	-0.0419427	0.0156855	-0.0116815	-0.0245524	0.0488044				1614.85	1687.67	470.808	416.053	1196.1	458.055				0.0674833	0.163112
403.342	575.679	424.733	423.735	977.927	1246.81				0.0831113	0.878519	0.63218	0.193326	0.452728	0.396284	0.144446				76.1305	110.653	236.814	1718.09	591.614	2708.34				0.0966512	-0.189596	-0.0436422	-0.0194701	-0.0312396	-0.0122035	-0.03325	0.0374447				1665.79	1775.25	574.013	401.188	1138.06	453.461				0.101156	0.223468
527.921	513.396	430.933	428.868	891.963	1264.77				0.417648	0.675281	0.656005	0.20778	0.325028	0.416403	0.0917397				78.63	89.6832	250.258	1684.34	607.1	2753.45				0.132656	-0.343178	0.0106476	-0.0387334	-0.00588067	0.0042468	-0.0400402	0.0651705				1676.93	1741.68	501.346	432.712	1123.14	483.142				0.108516	0.200338
527.868	469.717	384.658	468.015	905.39	1210.23				0.417507	0.53275	0.478178	0.318026	0.344974	0.35532	0.0400727				78.583	117.297	221.742	1761.48	608.518	2744.14				0.131979	-0.14094	-0.10451	0.00529276	-0.00355937	0.000851118	-0.018481	0.0392416				1624.45	1862.08	446.987	355.982	1186.88	456.726				0.0738277	0.283313
417.395	459.547	418.517	344.868	901.622	1301.72				0.120847	0.499565	0.60829	-0.0287814	0.339376	0.45778	0.117538				73.5753	101.723	231.546	1742.13	620.904	2647.48				0.0598439	-0.255002	-0.0649167	-0.0057508	0.0167234	-0.0344013	-0.0472506	0.0450637				1543.84	1785.27	520.5	413.082	1145.44	458.036				0.0205414	0.230378
396.763	515.528	405.608	451.265	941.927	1285.26				0.0654447	0.682238	0.558686	0.270855	0.399249	0.439351	0.108013				74.1825	99.8515	236.887	1692.78	627.376	2722.59				0.0685905	-0.268707	-0.0433506	-0.0339157	0.0273206	-0.00700929	-0.0428453	0.0482076				1539.32	1748.15	568.102	391.282	1204.41	494.735				0.0175506	0.204794
421.632	518.151	436.75	382.515	928.976	1222.11				0.132225	0.690796	0.678358	0.0772407	0.38001	0.368621	0.129996				70.7927	104.673	251.351	1783.38	603.893	2700.16				0.0197608	-0.233393	0.0150608	0.0177891	-0.0111318	-0.0151904	-0.0345175	0.0402543				1592.77	1665.86	425.269	383.859	1103.64	465.941				0.052884	0.148083
446.211	516.51	437.1	413.529	854.5	1300.35				0.198228	0.68544	0.679703	0.164584	0.269375	0.456247	0.116813				76.2019	114.218	238.763	1794.83	626.199	2752.74				0.0976798	-0.163491	-0.0357733	0.0243263	0.0253932	0.00398905	-0.00797939	0.0357868				1622.7	1762.59	550.462	372.671	1141.62	480.817				0.0726669	0.214744
505.632	535.34	438.683	445.588	861.634	1214.14				0.357794	0.746885	0.685787	0.254869	0.279973	0.359701	0.104425				78.7947	83.9604	276.289	1881.84	621.138	2715.52				0.135029	-0.385091	0.115772	0.0739853	0.0171061	-0.00958748	-0.00879767	0.078597				1618.98	1777.41	541.795	393.494	1181.17	428.932				0.0702081	0.224959
[truncated: 10 more columns]

## Sheet: M
	saline						F/F0						mean	SEM				nmu						F/F0						mean	SEM			peak
0	143.222	132.786	129.356	127.925	134.717	136.93	-0.00713225	0.00352728	0.00196009	-0.0279203	0.0209796	0.00806672	-8.64704e-05	0.00671284				150.734	143.881	129.127	127.791	126.358	147.588	0.0449135	-0.00105783	-0.00277833	-0.0083993	0.00214401	0.148432	0.0305423	0.0248571			saline	nmu
1	143.144	132.719	129.295	128.182	134.542	138.372	-0.00767298	0.00302093	0.0014876	-0.0259674	0.0196534	0.0186826	0.00153402	0.00698974				151.047	143.859	129.244	128.037	126.61	147.675	0.0470832	-0.00121058	-0.00187476	-0.00649045	0.00414262	0.149109	0.0317932	0.024799			0.178163	0.179696
2	143.172	132.818	129.348	128.038	134.21	138.016	-0.00747887	0.00376912	0.00189812	-0.0270616	0.0171372	0.0160618	0.000720956	0.00671967				151.397	143.669	129.32	128.08	126.091	140.211	0.0495095	-0.00252971	-0.00128783	-0.00615679	2.64366e-05	0.091029	0.0217651	0.0162697			0.262907	0.13959
3	143.178	132.607	129.344	128.099	134.341	136.805	-0.00743728	0.00217449	0.00186714	-0.0265981	0.01813	0.00714648	-0.000786203	0.00618344				155.29	143.805	129.278	127.67	126.515	130.489	0.0764964	-0.00158549	-0.00161219	-0.00933821	0.00338918	0.0153788	0.0137881	0.0129761			0.259615	0.176012
4	142.932	132.834	129.513	128.153	134.103	137.649	-0.00914264	0.00389004	0.00317617	-0.0261878	0.0163263	0.0133599	0.00023701	0.0064273				153.825	143.597	129.348	127.615	126.418	127.23	0.0663408	-0.0030296	-0.00107159	-0.00976498	0.00261987	-0.00998058	0.00751899	0.011936			0.192689	0.16162
5	142.98	132.448	129.532	128.201	133.318	137.748	-0.00880989	0.000972849	0.00332334	-0.025823	0.010377	0.0140888	-0.000978485	0.00593539				153.438	143.5	129.219	127.506	126.146	127.346	0.0636581	-0.00370305	-0.00206783	-0.0106108	0.000462641	-0.00907794	0.00644352	0.0115707			0.539022	0.203417
6	143.334	132.796	129.826	128.078	133.398	137.005	-0.00635583	0.00360285	0.0056006	-0.0267577	0.0109833	0.00861886	-0.000717976	0.00575193				154.017	143.417	129.174	127.601	126.699	127.413	0.0676718	-0.00427931	-0.00241536	-0.00987361	0.00484848	-0.00855659	0.00789923	0.0121428			0.330673	0.395995
7	143.524	132.878	129.865	128.227	133.364	137.097	-0.00503868	0.00422256	0.00590268	-0.0256254	0.0107257	0.00929616	-8.61774e-05	0.0055861				156.29	143.61	129.042	127.517	125.996	127.311	0.0834286	-0.00293934	-0.00343477	-0.0105254	-0.000727007	-0.00935029	0.00940863	0.0148867		Mean	0.293845	0.209388
8	143.575	132.677	129.897	128.434	132.784	137.277	-0.00468513	0.00270351	0.00615054	-0.0240525	0.00633001	0.0106213	-0.000488708	0.00515448				159.704	143.78	129.148	127.44	126.224	128.156	0.107095	-0.00175906	-0.00261615	-0.0111229	0.00108126	-0.00277506	0.0149839	0.0184975
9	143.623	132.566	130.104	128.452	134.01	137.228	-0.00435237	0.00186463	0.00775392	-0.0239157	0.0156215	0.0102606	0.00120542	0.00575933				159.604	143.708	128.989	127.391	126.806	126.661	0.106402	-0.00225894	-0.00384407	-0.0115031	0.00569709	-0.0144082	0.0133474	0.0188367
10	144.425	132.614	130.023	128.362	133.016	136.593	0.00120739	0.00222739	0.00712651	-0.0245996	0.00808827	0.00558575	-6.07158e-05	0.00502973				159.032	143.795	129.197	127.414	126.347	126.896	0.102437	-0.00165492	-0.00223773	-0.0113246	0.00205677	-0.0125795	0.0127828	0.0180844			Peak
11	145.436	132.812	130.072	128.264	134.385	137.216	0.00821601	0.00372377	0.00750605	-0.0253443	0.0184635	0.0101722	0.00378955	0.00615969				154.943	143.617	129.297	127.394	125.829	126.816	0.074091	-0.00289074	-0.00146545	-0.0114798	-0.00205148	-0.013202	0.0071669	0.0135426			P value	0.2305
12	146.166	132.703	129.94	128.296	134.365	137.273	0.0132766	0.00290001	0.00648361	-0.0251011	0.0183119	0.0105919	0.00441049	0.00629175				153.272	143.689	129.177	127.354	126.325	124.964	0.0625073	-0.00239086	-0.00239219	-0.0117902	0.00188229	-0.0276131	0.00336721	0.0125905			95% confidence interval	-0.2318 to 0.06290
13	146.446	132.475	130.413	128.343	134.428	137.622	0.0152177	0.0011769	0.0101474	-0.024744	0.0187894	0.0131612	0.00562476	0.00654377				153.004	143.66	129.269	127.418	126.456	124.371	0.0606495	-0.0025922	-0.00168169	-0.0112936	0.00292125	-0.0322274	0.0026293	0.0126769			F, DFn, Dfd	1.982, 5, 5
14	146.432	132.698	130.506	128.325	136.777	137.558	0.0151207	0.00286222	0.0108677	-0.0248808	0.0365918	0.01269	0.00887526	0.00816773				151.337	144.112	129.569	127.658	125.889	123.891	0.0490936	0.000545961	0.000635149	-0.00943132	-0.00157562	-0.0359625	0.00055088	0.0112454
15	146.415	132.6	130.908	128.473	135.291	136.613	0.0150028	0.00212159	0.0139815	-0.0237561	0.0253298	0.00573299	0.00640209	0.006875				151.13	144.427	129.802	128.276	125.801	125.404	0.0476586	0.00273295	0.00243456	-0.00463592	-0.00227355	-0.0241893	0.00362123	0.00969165
16	146.649	132.795	131.265	128.42	135.112	137.322	0.016625	0.00359529	0.0167467	-0.0241589	0.0239732	0.0109526	0.00795566	0.00699605				150.826	144.653	129.882	127.079	125.96	127.606	0.0455512	0.00430204	0.00305238	-0.0139241	-0.00101252	-0.00705479	0.00515237	0.00854036
17	146.224	132.407	131.328	128.395	135.892	137.822	0.0136787	0.000662992	0.0172347	-0.0243488	0.0298846	0.0146335	0.00862429	0.00761229				150.319	145.182	130.339	126.842	126.169	127.859	0.0420366	0.0079748	0.0065817	-0.0157631	0.000645054	-0.00508611	0.00606482	0.00801678
18	145.805	132.893	131.35	128.566	135.439	136.576	0.0107741	0.00433593	0.0174051	-0.0230494	0.0264515	0.0054606	0.00689629	0.00686353				150.152	145.456	130.127	128.276	125.893	129.035	0.040879	0.00987713	0.00494447	-0.00463592	-0.0015439	0.00406474	0.00893091	0.00672043
19	145.834	132.732	131.362	128.303	135.417	137.57	0.0109751	0.00311917	0.0174981	-0.0250479	0.0262847	0.0127783	0.00760125	0.00723709				150.013	145.622	130.017	128.516	126.239	129.232	0.0399154	0.0110296	0.00409496	-0.00277363	0.00120022	0.00559766	0.00984404	0.00629999
20	145.4	132.613	131.417	128.494	135.233	137.711	0.00796645	0.00221983	0.0179241	-0.0235966	0.0248902	0.0138164	0.00720341	0.00694153				150.144	146.279	130.009	128.559	126.375	128.938	0.0408235	0.0155911	0.00403318	-0.00243996	0.00227884	0.00330995	0.0105994	0.00651644			AUC
21	145.16	132.736	131.167	128.175	135.024	136.154	0.00630268	0.0031494	0.0159877	-0.0260206	0.0233063	0.00235387	0.00417989	0.00689496				149.748	146.921	129.882	128.308	126.101	128.972	0.0380784	0.0200484	0.00305238	-0.00438761	0.000105747	0.00357451	0.0100786	0.00654162			P value	<0.0001
22	145.036	132.799	130.852	128.378	134.275	136.252	0.00544307	0.00362552	0.0135477	-0.024478	0.0176298	0.00307534	0.00314058	0.00601824				149.599	147.644	129.625	128.352	125.965	128.828	0.0370455	0.0250681	0.00106763	-0.00404619	-0.000972868	0.002454	0.0101027	0.00686263			95% confidence interval	-48.99 to -45.29
23	144.725	132.71	131.003	128.187	132.911	136.253	0.0032871	0.00295291	0.0147174	-0.0259294	0.0072925	0.0030827	0.000900528	0.00567532				149.668	148.028	129.493	128.056	126.433	124.81	0.0375238	0.0277341	4.8216e-05	-0.00634302	0.00273884	-0.0288114	0.00548175	0.00978903			F, DFn, Dfd	2.795, 5, 5
24	144.566	132.549	131.04	128.194	133.308	136.366	0.00218485	0.00173615	0.0150039	-0.0258762	0.0103012	0.0039146	0.00121077	0.00581701				149.426	148.603	129.683	128.099	126.53	125.215	0.0358462	0.0317262	0.00151555	-0.00600936	0.00350814	-0.02566	0.00682113	0.00952451
25	144.49	132.484	130.807	128.201	134.166	135.905	0.00165799	0.00124492	0.0131992	-0.025823	0.0168038	0.000520757	0.00126727	0.00610559				149.44	148.947	129.485	127.853	126.198	127.057	0.0359432	0.0341146	-1.35664e-05	-0.00791821	0.000875053	-0.0113267	0.00861239	0.00856824
26	144.129	132.537	130.866	128.274	132.598	136.375	-0.000844594	0.00164546	0.0136562	-0.0252683	0.00492037	0.00398086	-0.000318336	0.0053785				149.195	148.669	129.358	128.118	126.496	128.111	0.0342449	0.0321845	-0.000994362	-0.00586193	0.00323849	-0.00312522	0.00994772	0.00746193
27	144	132.647	130.956	128.253	133.09	135.833	-0.00173887	0.00247679	0.0143533	-0.0254279	0.00864909	-9.30055e-06	-0.000282811	0.00558593				149.478	148.706	129.445	127.717	126.445	129.244	0.0362067	0.0324413	-0.000322478	-0.00897351	0.00283401	0.00569104	0.0113128	0.00756423
28	143.771	132.655	130.984	128.141	135.234	136.028	-0.00332638	0.00253725	0.0145702	-0.0262789	0.0248978	0.00142627	0.00230437	0.00709566				149.679	148.153	129.51	127.683	125.792	129.166	0.0376	0.028602	0.000179504	-0.00923733	-0.00234493	0.00508409	0.00998056	0.00763953
29	143.949	132.887	130.979	128.24	136.033	135.748	-0.00209242	0.00429058	0.0145315	-0.0255267	0.0309532	-0.000635063	0.00358685	0.00767435				149.303	148.328	129.462	126.969	125.914	128.951	0.0349935	0.029817	-0.000191191	-0.0147776	-0.00137735	0.0034111	0.0086459	0.00795202
30	143.797	132.757	131.056	128.189	136.407	136.415	-0.00314614	0.00330811	0.0151279	-0.0259142	0.0337876	0.00427533	0.0045731	0.00807392				149.501	147.964	129.183	127.389	126.083	134.427	0.0363661	0.0272898	-0.00234585	-0.0115186	-3.70113e-05	0.0460217	0.0159627	0.00965153
31	143.669	133.142	130.973	128.162	136.592	135.586	-0.00403348	0.00621774	0.014485	-0.0261194	0.0351897	-0.00182769	0.00398531	0.00835329				149.249	147.817	129.161	127.624	126.199	143.419	0.0346192	0.0262692	-0.00251575	-0.00969514	0.000882984	0.115991	0.027592	0.0190401
32	143.682	133.141	130.944	128.086	136.166	136.839	-0.00394336	0.00621018	0.0142604	-0.0266969	0.0319612	0.00739678	0.00486471	0.0079675				149.155	147.702	129.312	127.483	125.657	145.825	0.0339676	0.0254707	-0.00134961	-0.0107892	-0.00341561	0.134713	0.0297662	0.0221841
33	143.568	133.137	130.674	128.168	135.743	137.237	-0.00473365	0.00617995	0.012169	-0.0260738	0.0287554	0.0103268	0.00443729	0.00753636				148.96	147.235	129.305	127.464	125.812	144.583	0.0326158	0.0222284	-0.00140367	-0.0109367	-0.00218631	0.125049	0.0275611	0.0206267
34	143.481	133.214	130.716	128.154	135.493	136.792	-0.00533677	0.00676188	0.0124943	-0.0261802	0.0268607	0.00705077	0.00360846	0.00732302				149.105	147.196	129.284	127.165	126.517	142.464	0.033621	0.0219577	-0.00156585	-0.0132568	0.00340504	0.10856	0.0254536	0.0179818
35	143.383	133.081	130.527	128.001	134.856	138.024	-0.00601614	0.00575673	0.0110304	-0.0273428	0.0220331	0.0161207	0.00359698	0.0073174				148.726	146.925	129.488	126.846	125.733	139.192	0.0309937	0.0200762	9.60201e-06	-0.0157321	-0.00281286	0.0830998	0.0192724	0.0144869
36	143.259	133.124	130.471	127.973	135.508	136.729	-0.00687575	0.0060817	0.0105966	-0.0275555	0.0269744	0.00658697	0.00263473	0.00749492				148.896	146.607	129.485	127.856	125.875	130.449	0.0321721	0.0178683	-1.35664e-05	-0.00789493	-0.00168666	0.0150675	0.00925215	0.00614523
37	143.289	132.9	130.81	127.95	135.311	137.739	-0.00666778	0.00438883	0.0132224	-0.0277303	0.0254814	0.0140225	0.00378617	0.0076756				148.675	146.451	129.394	127.757	126.148	127.61	0.0306401	0.0167853	-0.000716341	-0.00866312	0.000478503	-0.00702367	0.00525013	0.00627244
38	143.128	132.771	130.916	127.843	134.875	138.633	-0.00778389	0.00341391	0.0140435	-0.0285434	0.0221771	0.0206041	0.0039852	0.0079692				148.809	146.223	129.409	127.871	125.801	125.1	0.031569	0.0152023	-0.000600499	-0.00777854	-0.00227355	-0.0265548	0.00159399	0.00813155
39	143.143	132.845	130.892	127.762	134.773	137.32	-0.00767991	0.00397317	0.0138576	-0.0291589	0.021404	0.0109379	0.00222231	0.00745023				148.554	146.343	129.7	127.575	126.049	125.137	0.0298013	0.0160354	0.00164684	-0.0100754	-0.000306665	-0.0262669	0.00180578	0.00799992
40	143.258	132.825	130.794	127.802	133.907	138.34	-0.00688269	0.00382202	0.0130985	-0.0288549	0.0148409	0.018447	0.0024118	0.00728423				148.781	145.9	129.893	127.729	125.845	126.284	0.0313749	0.0129598	0.00313733	-0.00888039	-0.00192459	-0.0173417	0.00322089	0.00703146
41	143.194	133.23	130.684	127.9	134.101	138.426	-0.00732636	0.0068828	0.0122465	-0.0281103	0.0163112	0.0190801	0.00318065	0.00732716				148.399	145.917	130.04	127.732	125.857	127.719	0.0287269	0.0130778	0.00427259	-0.00885711	-0.00182941	-0.0061755	0.0048692	0.00575092
42	143.274	132.881	130.823	127.863	134.092	138.049	-0.00677177	0.00424524	0.0133231	-0.0283914	0.0162429	0.0163047	0.00249214	0.00716442				148.269	145.674	130.027	127.9	126.571	127.442	0.0278257	0.0113907	0.00417219	-0.00755351	0.00383331	-0.00833093	0.0052229	0.00547389
43	143.257	132.772	130.539	127.947	134.298	137.748	-0.00688962	0.00342147	0.0111233	-0.0277531	0.0178042	0.0140888	0.00196583	0.00694126				148.542	145.837	130.243	128.013	125.607	128.098	0.0297182	0.0125224	0.00584031	-0.00667668	-0.00381216	-0.00322638	0.0057276	0.00561776
44	143.253	132.62	130.56	128.102	133.999	137.612	-0.00691735	0.00227274	0.011286	-0.0265753	0.0155381	0.0130875	0.00144862	0.0065492				148.165	146.087	130.246	128.085	125.913	125.568	0.0271047	0.0142581	0.00586348	-0.00611799	-0.00138528	-0.0229132	0.00280164	0.00704653
45	143.244	132.808	130.427	128.164	133.667	137.672	-0.00697974	0.00369354	0.0102558	-0.0261042	0.013022	0.0135293	0.00123611	0.00630453				148.297	146.24	130.779	128.938	126.405	124.311	0.0280198	0.0153203	0.00997973	0.000500905	0.00251677	-0.0326943	0.00394053	0.00837009
46	143.217	132.559	130.303	128.238	133.958	138.044	-0.00716691	0.00181173	0.00929532	-0.0255419	0.0152274	0.0162679	0.00164893	0.00651573				147.841	146.434	130.865	129.161	125.791	124.075	0.0248587	0.0166672	0.0106439	0.00223128	-0.00235286	-0.0345307	0.00291959	0.00848682
47	143.203	132.859	130.321	128.382	133.337	137.648	-0.00726397	0.00407897	0.00943474	-0.0244476	0.010521	0.0133526	0.000945954	0.00588704				147.773	146.668	131.013	129.632	125.582	124.744	0.0243873	0.0182918	0.0117869	0.00588603	-0.00401044	-0.029325	0.00450278	0.00786828
48	143.296	132.658	130.317	128.34	132.49	137.541	-0.00661926	0.00255992	0.00940376	-0.0247668	0.00410187	0.0125648	-0.000459272	0.00555466				147.913	146.43	131.099	130.366	126.343	123.96	0.0253578	0.0166395	0.012451	0.0115815	0.00202505	-0.0354255	0.00543823	0.00873818
49	143.422	132.453	130.012	128.139	133.788	136.945	-0.00574578	0.00101064	0.00704131	-0.0262941	0.013939	0.00817715	-0.000311968	0.0058753				147.553	146.358	130.913	130.187	126.028	124.085	0.0228622	0.0161396	0.0110146	0.0101926	-0.000473216	-0.0344529	0.00421382	0.00834479
50	143.739	132.673	129.927	128.201	133.203	137.35	-0.00354822	0.00267328	0.00638292	-0.025823	0.00950548	0.0111587	5.81954e-05	0.00560404				147.572	145.838	130.636	130.157	125.892	124.468	0.022994	0.0125293	0.00887537	0.0099598	-0.00155183	-0.0314726	0.00355566	0.00770444
51	143.73	132.826	130.007	128.16	133.325	137.014	-0.00361061	0.00382958	0.00700258	-0.0261346	0.0104301	0.00868512	3.36971e-05	0.00560941				147.549	145.834	130.786	130.577	125.844	124.192	0.0228345	0.0125015	0.0100338	0.0132188	-0.00193252	-0.0336203	0.00383931	0.00816238
52	143.856	132.722	129.769	128.1	132.406	137.63	-0.00273713	0.0030436	0.00515909	-0.0265905	0.00346526	0.0132201	-0.000739937	0.00557948				147.22	145.567	130.462	130.038	126.008	124.668	0.0205538	0.0106478	0.00753161	0.00903641	-0.000631836	-0.0299164	0.00287024	0.00711846
53	144.089	132.874	129.681	127.988	132.485	137.608	-0.00112189	0.00419233	0.00447746	-0.0274416	0.00406398	0.0130581	-0.000461931	0.00570868				147.35	145.537	130.38	130.187	125.926	124.27	0.021455	0.0104395	0.00689834	0.0101926	-0.00128218	-0.0330133	0.00244832	0.00769488
54	144.071	132.576	129.665	127.846	132.53	137.596	-0.00124667	0.00194021	0.00435353	-0.0285206	0.00440502	0.0129698	-0.00101646	0.00582842				147.454	145.397	130.578	129.573	126.235	124.086	0.022176	0.00946751	0.00842745	0.00542822	0.0011685	-0.0344451	0.00203709	0.00784182
55	144.149	132.433	129.31	128.057	132.749	136.624	-0.000705946	0.000859487	0.00160378	-0.0269172	0.00606475	0.00581397	-0.00221353	0.00506469				147.37	145.15	130.473	130.011	125.677	124.125	0.0215937	0.00775263	0.00761656	0.0088269	-0.00325699	-0.0341416	0.00139852	0.0078035
56	144.349	132.718	129.533	128.064	132.131	137.213	0.000680528	0.00301337	0.00333109	-0.0268641	0.00138112	0.0101501	-0.00138464	0.00527809				147.032	145.03	130.422	130.089	126.066	124.663	0.0192506	0.00691948	0.00722269	0.00943215	-0.000171838	-0.0299553	0.0021163	0.00690428
57	144.493	132.546	129.562	128.212	131.378	136.197	0.00167879	0.00171348	0.00355572	-0.0257394	-0.00432564	0.00267044	-0.00340777	0.00460825				147.199	144.965	130.209	130.307	126.504	124.486	0.0204083	0.0064682	0.00557774	0.0111237	0.00330194	-0.0313326	0.00259122	0.00722387
58	144.515	132.706	129.651	128.16	132.229	137.056	0.0018313	0.00292268	0.00424509	-0.0261346	0.00212383	0.00899432	-0.00100289	0.00513908				147.076	144.954	130.794	130.088	125.938	124.522	0.0195556	0.00639183	0.0100956	0.00942439	-0.001187	-0.0310524	0.00220466	0.00718915
59	144.766	132.527	129.462	128.131	132.079	136.281	0.00357133	0.00156989	0.00278114	-0.0263549	0.000987025	0.00328884	-0.00235945	0.00481638				146.836	144.829	131.024	129.684	125.704	124.821	0.0178919	0.00552397	0.0118718	0.00628953	-0.00304286	-0.0287258	0.00163476	0.00670703
60	144.786	132.287	129.448	127.983	132.016	136.725	0.00370997	-0.000243905	0.0026727	-0.0274796	0.000509566	0.00655753	-0.00237895	0.00511663				146.964	145.129	130.889	130.949	125.902	122.699	0.0187792	0.00760683	0.0108292	0.0161054	-0.00147252	-0.0452378	0.00110172	0.00971
61	144.903	132.584	129.446	128.145	132.58	136.689	0.00452106	0.00200067	0.00265721	-0.0262485	0.00478395	0.0062925	-0.00099886	0.00508915				146.813	144.755	130.758	130.946	126.275	123.54	0.0177324	0.0050102	0.00981755	0.0160821	0.00148574	-0.0386937	0.00190572	0.00850917
62	144.929	132.639	129.33	128.299	131.122	136.383	0.0047013	0.00241633	0.0017587	-0.0250783	-0.00626579	0.00403975	-0.00307134	0.00468664				147.138	144.83	130.828	131.811	125.554	124.62	0.0199854	0.00553092	0.0103582	0.0227941	-0.0042325	-0.0302899	0.00402436	0.00794793
63	145.026	132.435	129.465	128.247	131.935	136.996	0.00537374	0.000874602	0.00280438	-0.0254735	-0.000104308	0.0085526	-0.00132874	0.00499656				146.773	144.815	130.872	131.737	125.66	128.17	0.0174552	0.00542678	0.010698	0.0222199	-0.00339182	-0.00266612	0.0082903	0.00427606
64	145.214	132.372	129.401	128.082	132.223	135.547	0.00667703	0.000398481	0.00230865	-0.0267273	0.00207836	-0.00211481	-0.00289659	0.00490873				147.254	144.622	130.842	132.113	125.905	129.788	0.0207895	0.00408681	0.0104663	0.0251375	-0.00144873	0.00992408	0.0114926	0.00407616
65	145.33	132.434	129.378	128.068	131.973	136.405	0.00748118	0.000867044	0.0021305	-0.0268337	0.000183682	0.00420171	-0.00199492	0.00508302				147.588	144.672	130.849	131.89	125.94	129.557	0.0231049	0.00443395	0.0105203	0.0234071	-0.00117114	0.00812659	0.0114036	0.00407931
66	145.428	132.246	129.235	127.904	132.406	137.167	0.00816055	-0.000553762	0.00102285	-0.0280799	0.00346526	0.00981149	-0.00102891	0.00565198				147.314	144.589	131.373	131.013	125.829	129.217	0.0212055	0.00385769	0.0145671	0.016602	-0.00205148	0.00548094	0.00994361	0.00362112
67	145.734	132.417	129.304	128.013	132.08	135.768	0.0102819	0.000738567	0.00155731	-0.0272516	0.000994603	-0.000487825	-0.00236118	0.0052253				147.442	144.522	131.507	130.614	126.089	131.588	0.0220928	0.00339252	0.0156019	0.0135059	1.05747e-05	0.0239305	0.013089	0.00395879
68	145.709	132.428	129.108	128.023	132.3	136.918	0.0101085	0.000821699	3.91419e-05	-0.0271756	0.00266192	0.00797837	-0.000927653	0.00549833				147.078	144.706	131.816	131.91	125.977	126.225	0.0195695	0.00467001	0.0179883	0.0235623	-0.000877696	-0.0178008	0.00785192	0.00640639
69	145.418	132.563	129.066	128.118	132.885	136.933	0.00809123	0.00184196	-0.00028618	-0.0264537	0.00709546	0.0080888	-0.000270408	0.00542856				147.318	144.39	131.762	132.743	125.47	129.611	0.0212332	0.00247607	0.0175712	0.030026	-0.00489871	0.00854679	0.0124924	0.00525347
70	145.42	132.605	129.056	128.195	132.032	136.696	0.00810509	0.00215937	-0.000363637	-0.0258686	0.000630826	0.00634403	-0.00149882	0.00505582				147.23	144.531	131.488	132.924	125.548	129.057	0.0206232	0.00345501	0.0154552	0.0314305	-0.00428009	0.00423593	0.0118199	0.0053603
71	145.219	132.431	128.922	128.142	132.228	137.119	0.00671169	0.000844372	-0.00140157	-0.0262713	0.00211625	0.00945812	-0.00142375	0.00522711				147.431	144.715	131.345	133.73	125.993	129.668	0.0220165	0.00473249	0.0143508	0.0376847	-0.0007508	0.00899032	0.014504	0.00563441
72	145	132.33	129.139	128.202	131.709	136.97	0.0051935	8.10665e-05	0.00027926	-0.0258154	-0.00181709	0.00836119	-0.00228625	0.0049509				146.977	144.756	131.248	134.128	125.924	129.419	0.0188693	0.00501715	0.0136017	0.040773	-0.00129804	0.00705277	0.0140026	0.00606533
73	145.147	132.48	129.085	128.152	132.054	137.138	0.00621256	0.00121469	-0.000139011	-0.0261954	0.000797557	0.009598	-0.00141859	0.00518643				146.841	144.722	130.726	133.416	125.386	130.181	0.0179265	0.00478109	0.00957043	0.0352482	-0.00556491	0.0129821	0.0124906	0.00560257
74	145.366	132.459	129.292	128.266	132.601	136.731	0.00773075	0.00105598	0.00146436	-0.0253291	0.00494311	0.0066017	-0.000588866	0.00506795				146.571	144.571	130.524	133.351	125.983	130.062	0.0160549	0.00373272	0.00801042	0.0347438	-0.00083011	0.0120562	0.0122946	0.00510582
75	145.344	132.409	129.264	128.165	132.198	136.691	0.00757823	0.000678107	0.00124748	-0.0260966	0.00188889	0.00630722	-0.00139944	0.00507305				146.328	144.381	130.529	134.141	126.087	130.15	0.0143703	0.00241358	0.00804903	0.0408738	-5.28733e-06	0.0127409	0.0130737	0.00601272
76	145.338	132.176	129.162	127.969	132.45	137.06	0.00753664	-0.00108279	0.000457413	-0.0275859	0.00379872	0.00902377	-0.0013087	0.00549166				146.261	144.04	130.139	137.48	125.988	130.464	0.0139059	4.60773e-05	0.00503714	0.066783	-0.000790455	0.0151843	0.0166943	0.0103886
77	145.471	132.41	129.359	128.143	131.109	136.929	0.00845865	0.000685665	0.00198333	-0.0262637	-0.00636431	0.00805936	-0.00224018	0.00529492				146.281	144.167	129.845	134.434	125.956	131.061	0.0140445	0.000927817	0.00276664	0.0431474	-0.00104425	0.0198297	0.0132786	0.00684065
78	145.518	132.376	129.52	128.268	132.066	136.022	0.00878447	0.000428711	0.00323039	-0.0253139	0.000888501	0.0013821	-0.00176662	0.00487358				146.635	144.175	129.808	135.279	125.809	131.759	0.0164985	0.00098336	0.0024809	0.0497042	-0.0022101	0.0252611	0.015453	0.00808305
79	145.447	132.243	129.522	128.733	132.105	135.704	0.00829227	-0.000576434	0.00324589	-0.0217804	0.00118407	-0.000958987	-0.00176561	0.00423334				146.27	144.334	129.941	135.602	125.886	128.327	0.0139683	0.00208727	0.00350803	0.0522105	-0.00159942	-0.00144445	0.011455	0.00847556
80	145.403	132.349	129.973	128.806	132.054	136.354	0.00798724	0.000224659	0.00673922	-0.0212257	0.000797557	0.00382626	-0.000275131	0.00437652				146.283	144.284	129.884	136.275	125.658	124.516	0.0140584	0.00174013	0.00306783	0.0574327	-0.00340768	-0.0310991	0.00696538	0.0118269
81	145.16	132.19	130.017	128.628	131.27	136.532	0.00630268	-0.00097698	0.00708003	-0.0225783	-0.00514414	0.00513668	-0.00169667	0.00460493				146.049	144.599	129.569	138.207	125.605	124.367	0.0124363	0.00392712	0.000635149	0.0724242	-0.00382802	-0.0322585	0.00888936	0.0141385
82	145.434	132.168	130.032	128.549	131.745	136.402	0.00820215	-0.00114324	0.00719622	-0.0231786	-0.00154426	0.00417963	-0.00104802	0.00472892				145.95	144.374	129.315	136.999	125.881	125.391	0.01175	0.00236498	-0.00132644	0.0630506	-0.00163907	-0.0242905	0.00831827	0.0119699
83	145.17	132.257	129.933	128.533	132.243	135.487	0.006372	-0.000470629	0.00642939	-0.0233002	0.00222993	-0.00255652	-0.00188267	0.0045288				146.244	144.35	129.181	136.928	126.004	127.694	0.013788	0.00219836	-0.0023613	0.0624997	-0.000663559	-0.00637004	0.0115152	0.0105706
84	144.959	132.313	130.016	128.611	132.145	135.291	0.00490927	-4.74106e-05	0.00707229	-0.0227075	0.00148722	-0.00399946	-0.00221426	0.00439143				145.537	144.01	129.096	136.706	125.178	127.234	0.00888699	-0.000162208	-0.00301773	0.0607771	-0.00721456	-0.00994945	0.00822002	0.0108437
85	144.841	132.434	129.91	128.495	132.054	136.058	0.00409125	0.000867044	0.00625124	-0.023589	0.000797557	0.00164713	-0.00165579	0.00447179				145.941	144.226	128.885	136.594	125.561	126.294	0.0116876	0.00133744	-0.00464724	0.059908	-0.00417699	-0.0172639	0.00780749	0.0111036
86	144.707	132.327	129.845	128.413	131.211	134.986	0.00316232	5.83941e-05	0.00574776	-0.0242121	-0.00559129	-0.00624484	-0.00451329	0.00438675				145.756	143.957	128.597	136.651	126.034	125.858	0.0104051	-0.000530178	-0.00687141	0.0603503	-0.00042563	-0.0206566	0.00704528	0.0114411
87	144.683	132.341	129.525	128.238	131.876	135.883	0.00299594	0.000164199	0.00326912	-0.0255419	-0.000551451	0.000358795	-0.00321754	0.0045107				145.785	143.89	128.523	136.456	125.354	128.376	0.0106062	-0.000995348	-0.0074429	0.0588372	-0.0058187	-0.00106316	0.00902054	0.0102915
88	144.605	132.569	129.612	128.198	131.949	136.133	0.00245521	0.0018873	0.003943	-0.0258458	1.79363e-06	0.00219927	-0.00255987	0.00468566				145.949	143.79	128.587	135.298	125.664	129.881	0.011743	-0.00168963	-0.00694864	0.0498516	-0.0033601	0.0106477	0.0100407	0.0085518
89	144.314	132.448	129.456	127.992	132.022	136.359	0.000437895	0.000972849	0.00273467	-0.0274112	0.000555039	0.00386307	-0.00314128	0.0048854				145.73	144.244	128.542	134.594	126.131	137.882	0.0102249	0.00146242	-0.00729616	0.0443889	0.000343676	0.0729062	0.0203383	0.0128632
90	144.51	132.527	129.093	127.92	131.716	135.939	0.00179664	0.00156989	-7.70445e-05	-0.0279583	-0.00176404	0.000771062	-0.00427696	0.00476556				146.108	144.271	128.804	134.061	125.682	139.119	0.0128453	0.00164987	-0.00527279	0.0402531	-0.00321734	0.0825317	0.021465	0.0139919
91	144.842	132.203	129.056	127.891	131.262	136.465	0.00409819	-0.000878733	-0.000363637	-0.0281786	-0.00520477	0.00464343	-0.00431403	0.00499574				146.713	144.814	128.833	133.631	125.707	142.534	0.0170392	0.00541983	-0.00504883	0.0369165	-0.00301906	0.109105	0.0267354	0.0176374
92	145.182	132.331	129.232	127.804	131.902	135.572	0.00645519	8.8624e-05	0.000999616	-0.0288397	-0.000354405	-0.00193076	-0.00393025	0.00511723				146.794	144.861	128.798	133.158	125.874	142.26	0.0176007	0.00574615	-0.00531913	0.0332462	-0.00169459	0.106973	0.026092	0.0171636
93	145.208	132.264	129.193	127.845	131.89	136.102	0.00663543	-0.000417727	0.000697531	-0.0285282	-0.00044535	0.00197105	-0.00334788	0.00514905				146.845	144.657	129.022	132.489	125.659	138.778	0.0179543	0.00432981	-0.00358922	0.0280551	-0.00339975	0.0798783	0.0205381	0.0129129
94	145.272	132.401	129.108	127.852	131.807	136.977	0.0070791	0.000617647	3.91419e-05	-0.028475	-0.00107438	0.00841273	-0.00223346	0.00548732				146.79	144.929	129.003	132.298	125.61	142.69	0.017573	0.00621826	-0.00373595	0.026573	-0.00378837	0.110319	0.0255265	0.0176471
95	145.22	132.027	129.094	128.646	131.374	136.313	0.00671862	-0.00220885	-6.92987e-05	-0.0224415	-0.00435596	0.00352442	-0.00313877	0.00418701				146.506	144.534	128.751	132.241	126.08	137.366	0.0156043	0.00347584	-0.0056821	0.0261307	-6.08043e-05	0.068891	0.0180598	0.0111948
96	145.013	132.137	128.771	129.638	131.896	136.805	0.00528362	-0.00137753	-0.00257118	-0.0149035	-0.000399877	0.00714648	-0.001137	0.00317288				146.377	144.552	128.683	131.612	125.934	145.586	0.01471	0.00360081	-0.00620725	0.0212499	-0.00121873	0.132854	0.0274981	0.0214741
97	144.913	132.121	129.016	130.603	132.406	136.954	0.00459038	-0.00149845	-0.000673468	-0.00757063	0.00346526	0.0082434	0.00109275	0.00226482				146.291	144.679	128.646	131.298	125.77	147.678	0.0141138	0.00448255	-0.00649299	0.0188134	-0.00251941	0.149132	0.0295883	0.0242276
98	144.983	132.26	129.022	131.599	131.087	137.372	0.00507565	-0.000447957	-0.000626993	-2.20366e-06	-0.00653105	0.0113207	0.00146469	0.00247855				145.75	144.314	128.63	131.058	126.156	144.985	0.0103635	0.00194841	-0.00661656	0.0169512	0.000541951	0.128177	0.0252276	0.0208594
99	144.778	132.087	128.909	132.643	131.692	137.163	0.00365451	-0.0017554	-0.00150226	0.00793097	-0.00194593	0.00978204	0.00269399	0.00214106				145.912	144.154	128.51	131.032	126.74	139.443	0.0114866	0.000837561	-0.00754329	0.0167494	0.00517365	0.0850529	0.0186261	0.0137225
100	144.66	132.096	129.022	133.304	132.191	138.421	0.00283649	-0.00168738	-0.000626993	0.0129538	0.00183584	0.0190433	0.00572585	0.0034078				145.837	143.845	128.83	130.932	126.6	133.579	0.0109666	-0.00130778	-0.005072	0.0159734	0.00406331	0.0394231	0.0106745	0.00655714
101	144.596	132.059	128.977	133.472	131.42	137.449	0.00239282	-0.00196701	-0.000975552	0.0142304	-0.00400734	0.0118876	0.00359348	0.00312487				145.651	144.15	128.869	130.4	126.023	130.863	0.00967726	0.000809789	-0.00477081	0.0118454	-0.000512871	0.018289	0.00588963	0.00357773
102	144.344	132.227	128.737	134.159	131.027	137.838	0.000645866	-0.000697354	-0.00283453	0.0194508	-0.00698577	0.0147513	0.00405506	0.00430121				142.366	144.169	129.109	130.435	126.237	126.561	-0.0130949	0.000941703	-0.00291734	0.012117	0.00118436	-0.0151863	-0.00282592	0.0041304
103	144.366	131.896	128.878	134.639	131.72	137.298	0.000798378	-0.00319888	-0.00174238	0.0230982	-0.00173373	0.0107759	0.00466625	0.00422657				139.784	144.612	129.263	130.143	126.372	123.971	-0.0309938	0.00401738	-0.00172803	0.00985116	0.00225504	-0.03534	-0.00865636	0.00791873
104	144.228	131.93	129.03	134.397	130.645	138.37	-0.000158289	-0.00294192	-0.000565027	0.0212593	-0.00988083	0.0186679	0.00439685	0.00513512				139.677	144.601	129.289	130.603	126.085	122.655	-0.0317355	0.00394101	-0.00152723	0.0134206	-2.11493e-05	-0.0455802	-0.0102504	0.00940256
105	144.245	131.978	128.975	134.678	131.733	136.799	-4.04388e-05	-0.00257917	-0.000991044	0.0233946	-0.00163521	0.00710231	0.00420851	0.00408978				140.526	144.357	129.254	130.295	125.976	122.662	-0.0258501	0.00224696	-0.00179753	0.0110306	-0.000885627	-0.0455257	-0.0101302	0.00867146
106	144.134	131.989	128.988	134.918	131.903	136.889	-0.000809932	-0.00249603	-0.000890349	0.0252183	-0.000346827	0.00776488	0.00474001	0.00435603				141.032	144.39	129.408	130.371	126.216	123.634	-0.0223424	0.00247607	-0.000608222	0.0116203	0.00101781	-0.0379623	-0.00763311	0.0076011
107	144.089	131.841	128.831	134.553	130.758	137.069	-0.00112189	-0.00361454	-0.00210643	0.0224447	-0.00902444	0.00909002	0.00261124	0.00463927				142.364	144.382	129.999	130.204	126.368	124.619	-0.0131088	0.00242053	0.00395595	0.0103245	0.00222332	-0.0302976	-0.00408035	0.00611811
108	144.041	131.925	128.936	135.059	131.412	136.989	-0.00145464	-0.00297971	-0.00129313	0.0262897	-0.00406797	0.00850107	0.00416589	0.00479063				142.659	144.49	130.27	129.934	125.979	124.865	-0.0110638	0.00317035	0.00604883	0.00822942	-0.000861834	-0.0283834	-0.00381008	0.00564515
109	144.052	132.161	129.259	134.71	131.833	135.74	-0.00137839	-0.00119615	0.00120875	0.0236377	-0.000877335	-0.000693958	0.00345011	0.00405531				142.854	144.216	130.309	129.64	126.202	126.767	-0.00971201	0.00126802	0.00635002	0.00594811	0.000906777	-0.0135833	-0.0014704	0.0033862
110	143.811	132.135	129.18	134.692	131.713	135.813	-0.00304909	-0.00139264	0.000596836	0.023501	-0.00178678	-0.000156539	0.00295213	0.00414252				143.14	144.155	130.321	129.734	126.421	135.763	-0.00772941	0.000844503	0.00644269	0.00667751	0.00264366	0.0564176	0.0108828	0.00935571
111	143.924	132.163	129.249	134.775	131.163	136.002	-0.00226573	-0.00118103	0.00113129	0.0241317	-0.00595506	0.00123486	0.00284933	0.00439098				141.822	143.808	130.64	129.766	126.328	139.216	-0.016866	-0.00156466	0.00890626	0.00692581	0.00190608	0.0832865	0.0137657	0.0143962
112	143.872	131.665	129.214	134.816	131.508	136.087	-0.00262621	-0.00494466	0.000860192	0.0244432	-0.00334041	0.00186063	0.00270879	0.0044727				142.599	143.85	130.436	129.3	125.898	147.397	-0.0114797	-0.00127306	0.00733081	0.00330986	-0.00150424	0.146946	0.0238882	0.024745
113	144.524	131.838	129.206	135.023	131.701	135.859	0.00189369	-0.00363721	0.000798226	0.0260162	-0.00187772	0.000182109	0.00389588	0.00449735				143.008	143.716	130.503	129.321	126.391	146.747	-0.00864446	-0.0022034	0.00784824	0.00347281	0.00240573	0.141888	0.0241278	0.0236631
114	144.869	131.937	129.207	134.485	132.23	136.037	0.00428536	-0.00288902	0.000805972	0.021928	0.00213141	0.00149253	0.00462571	0.00358973				141.751	143.749	130.307	129.157	126.526	135.643	-0.0173582	-0.00197429	0.00633457	0.00220025	0.00347642	0.0554838	0.00802709	0.0100898
115	144.866	132.106	129.156	134.935	131.258	135.882	0.00426456	-0.00161181	0.000410938	0.0253475	-0.00523509	0.000351433	0.00392125	0.00446736				141.995	143.761	130.382	128.87	126.363	129.902	-0.0156667	-0.00189097	0.00691378	-2.67446e-05	0.00218367	0.0108112	0.000387356	0.00373083
116	144.837	131.866	129.058	134.515	131.926	136.098	0.00406352	-0.0034256	-0.000348146	0.022156	-0.000172516	0.00194161	0.00403581	0.00376532				142.213	143.392	130.77	129.17	125.971	127.394	-0.0141555	-0.00445288	0.00991023	0.00230112	-0.000925282	-0.00870444	-0.00267113	0.00345219
117	144.93	132.386	129.136	134.868	132.51	136.199	0.00470823	0.000504285	0.000256023	0.0248384	0.00425344	0.00268516	0.00620758	0.00380144				141.111	143.757	131.042	128.881	126.278	128.63	-0.0217948	-0.00191875	0.0120108	5.86105e-05	0.00150953	0.000913295	-0.00153688	0.00451626
118	144.947	132.354	129.128	134.837	132.322	135.041	0.00482608	0.000262446	0.000194057	0.0246028	0.00282865	-0.00583994	0.00447902	0.00428342				141.64	143.898	130.969	128.512	126.44	127.655	-0.0181277	-0.000939805	0.0114471	-0.00280466	0.00279435	-0.00667351	-0.00238404	0.00402757
119	145.127	132.16	128.87	134.8	132.78	135.826	0.00607391	-0.0012037	-0.00180435	0.0243216	0.00629969	-6.08339e-05	0.00560439	0.00401818				142.56	144.087	130.739	128.589	125.828	126.991	-0.0117501	0.000372391	0.00967082	-0.00220718	-0.00205941	-0.0118403	-0.00296896	0.00330729
120	145.18	132.442	129.147	135.148	131.734	136.624	0.00644133	0.000927504	0.000341226	0.026966	-0.00162763	0.00581397	0.00647707	0.00429872				143.461	143.845	130.411	128.54	126.189	125.645	-0.00550419	-0.00130778	0.00713774	-0.0025874	0.000803674	-0.022314	-0.00396199	0.00405801
121	145.266	132.558	129.173	135.133	132.596	136.466	0.00703751	0.00180417	0.000542616	0.026852	0.00490521	0.00465079	0.00763206	0.00395942				143.234	143.703	130.13	128.34	126.788	125.675	-0.00707779	-0.00229366	0.00496764	-0.00413931	0.00555434	-0.0220806	-0.00417822	0.00412643
122	145.575	132.251	128.955	135.318	132.607	135.003	0.00917961	-0.000515974	-0.00114596	0.0282578	0.00498858	-0.00611969	0.00577407	0.00498881				143.26	143.507	129.977	128.193	125.853	125.255	-0.00689755	-0.00365445	0.00378605	-0.00527996	-0.00186114	-0.0253487	-0.00654263	0.00405104
123	145.537	132.419	129.006	135.313	132.848	135.783	0.00891618	0.000753682	-0.000750925	0.0282198	0.00681504	-0.000377396	0.00726274	0.00449849				143.866	143.268	130.258	128.001	126.196	125.227	-0.00269666	-0.00531379	0.00595616	-0.00676979	0.000859191	-0.0255666	-0.00558858	0.00441139
124	145.388	132.378	129.012	135.192	132.698	135.377	0.00788326	0.000443825	-0.000704451	0.0273004	0.00567824	-0.00336633	0.00620582	0.00454845				144.205	143.334	130.618	127.877	126.717	125.9	-0.000346655	-0.00485556	0.00873636	-0.00773198	0.00499124	-0.0203298	-0.00325606	0.0042206
125	145.22	132.269	128.773	135.093	131.433	136.192	0.00671862	-0.00037994	-0.00255569	0.0265481	-0.00390882	0.00263363	0.00484265	0.00461203				143.813	143.643	130.604	127.775	126.151	123.732	-0.00306406	-0.00271023	0.00862824	-0.00852345	0.000502296	-0.0371997	-0.00706115	0.00645172
126	145.323	132.387	128.75	135.142	132.579	135.979	0.00743265	0.000511843	-0.00273384	0.0269204	0.00477637	0.00106554	0.00632883	0.00436392				147.11	143.893	130.814	127.835	126.238	122.029	0.0197913	-0.00097452	0.01025	-0.00805788	0.00119229	-0.0504513	-0.00470835	0.00996056
127	145.253	132.593	128.626	135.12	131.396	135.743	0.00694739	0.00206868	-0.00369431	0.0267533	-0.00418923	-0.000671873	0.00453565	0.00474868				148.435	143.778	130.763	128.127	126.641	121.857	0.0289764	-0.00177295	0.00985617	-0.00579209	0.00438848	-0.0517897	-0.00268894	0.0110023
128	145.12	132.395	129.031	135.588	132.633	135.986	0.00602538	0.000572303	-0.000557281	0.0303095	0.00518562	0.00111707	0.00710877	0.00476284				149.018	143.862	130.967	128.237	126.37	122.499	0.0330179	-0.00118975	0.0114316	-0.00493854	0.00223918	-0.0467941	-0.00103895	0.0107003
129	145.096	132.601	129.122	135.751	132.396	134.74	0.00585901	0.00212914	0.000147582	0.0315481	0.00338947	-0.00805587	0.00583624	0.005496				148.605	144.033	131.315	127.882	126.222	122.866	0.0301549	-2.52256e-06	0.0141192	-0.00769318	0.0010654	-0.0439383	-0.0010491	0.0101538
130	144.874	132.436	129.119	135.844	132.357	135.591	0.00432002	0.000882159	0.000124345	0.0322548	0.0030939	-0.00179088	0.00648073	0.00523007				148.107	143.736	131.872	127.831	126.335	124.64	0.0267027	-0.00206454	0.0184208	-0.00808892	0.0019616	-0.0301342	0.00113289	0.00821841
131	144.822	132.658	129.14	135.983	131.48	136.507	0.00395954	0.00255992	0.000287006	0.033311	-0.00355262	0.00495263	0.00691959	0.00542158				147.991	143.533	132.266	127.839	126.309	123.146	0.0258985	-0.00347394	0.0214635	-0.00802684	0.00175539	-0.0417596	-0.000690479	0.00991967
132	144.87	132.302	129.27	136.263	131.454	136.073	0.00429229	-0.000130543	0.00129395	0.0354387	-0.00374966	0.00175756	0.00648372	0.00589049				146.78	143.529	132.492	127.924	126.646	121.886	0.0175037	-0.00350171	0.0232089	-0.00736728	0.00442814	-0.051564	-0.00288205	0.0108631
133	144.748	132.463	129.22	136.766	131.943	136.539	0.00344654	0.00108621	0.000906667	0.0392609	-4.36786e-05	0.00518821	0.00830748	0.00624002				146.325	143.441	132.199	127.723	126.057	121.652	0.0143495	-0.00411268	0.0209461	-0.00892695	-0.000243217	-0.0533849	-0.00522868	0.0106883
134	144.587	132.289	129.118	136.59	131.635	135.934	0.00233043	-0.00022879	0.000116599	0.0379235	-0.00237792	0.000734253	0.00641635	0.00633211				145.79	143.27	131.892	127.626	126.31	122.143	0.0106408	-0.00529991	0.0185752	-0.00967963	0.00176332	-0.0495642	-0.00559407	0.00975023
135	144.772	132.472	129.069	136.352	131.975	136.33	0.00361292	0.00115423	-0.000262943	0.036115	0.00019884	0.00364957	0.00741127	0.00578085				145.246	143.342	131.78	127.696	126.956	122.348	0.00686973	-0.00480002	0.0177103	-0.00913646	0.00688674	-0.0479691	-0.00507313	0.00941877
136	145.01	132.444	128.915	136.318	130.641	136.909	0.00526282	0.000942619	-0.00145579	0.0358567	-0.00991115	0.00791212	0.00643455	0.00640004				144.75	143.041	131.219	127.984	126.145	122.696	0.00343138	-0.00688982	0.0133778	-0.00690171	0.00045471	-0.0452612	-0.0069648	0.00825342
137	144.905	132.835	128.946	136.324	131.588	135.851	0.00453492	0.00389759	-0.00121567	0.0359022	-0.00273412	0.000123214	0.00675136	0.00594478				144.462	143.25	131.294	128.409	126.179	124.113	0.00143491	-0.00543876	0.013957	-0.0036039	0.000724364	-0.034235	-0.0045269	0.00655497
138	144.675	132.857	129.119	135.847	131.553	136.621	0.00294048	0.00406386	0.000124345	0.0322776	-0.00299937	0.00579189	0.00703313	0.00520504				144.125	142.888	131.041	129.176	126.829	122.327	-0.000901228	-0.00795207	0.0120031	0.00234768	0.00587951	-0.0481325	-0.00612591	0.00883134
139	144.6	132.692	128.743	135.749	131.205	136.464	0.00242055	0.00281687	-0.00278806	0.0315329	-0.00563676	0.00463607	0.00549693	0.00544016				143.884	143.058	130.697	131.002	126.287	124.265	-0.00257188	-0.00677179	0.00934646	0.0165166	0.00158091	-0.0330522	-0.00249199	0.00700075
140	144.734	132.748	128.68	135.488	131.353	137.126	0.00334949	0.00324009	-0.00327604	0.0295496	-0.00451511	0.00950965	0.00630962	0.00509111				143.693	142.999	130.396	130.858	125.834	126.391	-0.00389592	-0.00718141	0.0070219	0.0153992	-0.00201183	-0.0165091	-0.00119619	0.00455049
141	145.128	132.786	128.509	135.628	131.66	135.469	0.00608084	0.00352728	-0.00460057	0.0306135	-0.00218845	-0.00268904	0.00512392	0.00536116				143.735	142.947	130.223	131	126.403	129.217	-0.00360477	-0.00754244	0.00568586	0.0165011	0.00250091	0.00548094	0.00317026	0.00341804
142	145.293	132.571	128.77	135.926	131.871	136.18	0.00722468	0.00190242	-0.00257892	0.0328779	-0.000589345	0.00254528	0.006897	0.00536916				143.536	143.087	130.34	130.752	126.438	127.831	-0.00498428	-0.00657045	0.00658943	0.0145767	0.00277849	-0.00530399	0.00118099	0.00342247
143	145.252	132.435	128.676	136.037	130.689	137.039	0.00694046	0.000874602	-0.00330702	0.0337214	-0.00954737	0.00886917	0.00625854	0.00614221				142.99	142.951	130.297	130.711	125.6	126.368	-0.00876924	-0.00751467	0.00625735	0.0142586	-0.00386768	-0.0166881	-0.00272062	0.00456389
144	145.157	132.328	128.643	136.212	131.346	135.499	0.00628188	6.59516e-05	-0.00356263	0.0350512	-0.00456816	-0.00246818	0.00513334	0.00619031				142.992	143.163	129.966	130.785	126.036	126.107	-0.00875537	-0.00604279	0.0037011	0.0148328	-0.000409768	-0.018719	-0.00256551	0.00468316
145	144.896	132.413	128.693	136.747	131.905	136.359	0.00447253	0.000708337	-0.00317535	0.0391165	-0.000331669	0.00386307	0.00744224	0.00643792				143.048	143.314	129.79	130.058	126.388	125.537	-0.00836717	-0.00499442	0.00234189	0.0091916	0.00238194	-0.0231544	-0.00376676	0.00462454
146	144.765	132.471	128.703	136.34	130.946	135.801	0.00356439	0.00114667	-0.00309789	0.0360238	-0.00759964	-0.000244882	0.00496541	0.00640629				142.773	143.471	129.792	130.021	125.717	123.435	-0.0102735	-0.0039044	0.00235733	0.0089045	-0.00293975	-0.0395107	-0.0075611	0.00690979
147	144.588	132.478	128.468	135.824	131.503	136.761	0.00233736	0.00119957	-0.00491814	0.0321028	-0.00337831	0.00682255	0.00569431	0.00555305				142.499	143.402	129.94	130.186	125.785	124.783	-0.0121729	-0.00438345	0.00350031	0.0101848	-0.00240045	-0.0290215	-0.00571553	0.00558386
148	144.614	132.166	128.472	135.614	131.365	136.302	0.00251761	-0.00115836	-0.00488716	0.0305071	-0.00442417	0.00344344	0.00433307	0.00541918				142.315	143.722	130.029	129.677	126.174	124.465	-0.0134485	-0.00216174	0.00418764	0.00623521	0.000684709	-0.031496	-0.00599977	0.00582646
149	144.585	132.542	128.532	135.37	131.244	135.626	0.00231657	0.00168325	-0.00442241	0.028653	-0.00534119	-0.00153322	0.00355933	0.00517564				142.329	143.442	129.972	129.545	126.115	122.377	-0.0133514	-0.00410574	0.00374744	0.00521095	0.00021678	-0.0477434	-0.00933756	0.00814996
150	144.587	132.645	128.491	134.887	130.91	135.768	0.00233043	0.00246167	-0.00473999	0.0249827	-0.00787247	-0.000487825	0.00277909	0.00473979				142.657	143.546	129.819	129.836	125.801	122.016	-0.0110777	-0.00338368	0.00256585	0.00746898	-0.00227355	-0.0505525	-0.00954209	0.00858476
151	144.452	132.637	128.488	134.669	130.984	136.321	0.00139456	0.00240121	-0.00476323	0.0233262	-0.00731165	0.00358331	0.00310507	0.00440818				142.472	143.401	129.485	129.401	125.7	122.833	-0.0123601	-0.00439039	-1.35664e-05	0.00409358	-0.00307458	-0.0441951	-0.00999003	0.00719412
152	144.521	132.525	128.455	134.527	131.512	136.008	0.0018729	0.00155477	-0.00501884	0.0222472	-0.0033101	0.00127903	0.00310415	0.00400345				142.751	143.36	129.387	128.982	125.857	123.88	-0.010426	-0.00467505	-0.000770401	0.000842325	-0.00182941	-0.0360481	-0.00881777	0.00568082
153	144.305	132.34	128.597	134.374	130.566	135.879	0.000375503	0.000156641	-0.00391894	0.0210845	-0.0104795	0.000329347	0.00125792	0.00432249				142.516	143.042	129.508	128.813	125.723	123.298	-0.0120551	-0.00688287	0.000164058	-0.000469039	-0.00289217	-0.0405768	-0.010452	0.00630429
154	144.196	132.517	128.63	133.918	130.98	136.157	-0.000380125	0.00149431	-0.00366333	0.0176195	-0.00734197	0.00237596	0.00168405	0.00350607				142.552	143.143	129.602	129.056	125.814	124.141	-0.0118055	-0.00618165	0.000890001	0.00141653	-0.00217045	-0.0340171	-0.0086447	0.00545855
155	144.034	132.538	128.624	133.823	131.289	135.746	-0.00150317	0.00165302	-0.0037098	0.0168976	-0.00500015	-0.000649787	0.00128128	0.00326525				142.819	142.781	129.395	128.691	125.96	123.458	-0.00995464	-0.00869495	-0.000708618	-0.0014157	-0.00101252	-0.0393318	-0.0101864	0.00606258
156	144.055	132.313	128.755	133.736	131.448	136.012	-0.00135759	-4.74106e-05	-0.00269511	0.0162365	-0.00379513	0.00130848	0.00160829	0.00301843				142.4	142.919	129.544	128.911	125.919	123.989	-0.0128592	-0.00773684	0.000442079	0.000291397	-0.00133769	-0.0351999	-0.00940003	0.00558616
157	143.931	132.408	128.837	133.76	131.139	135.199	-0.0022172	0.00067055	-0.00205996	0.0164189	-0.00613695	-0.00467675	0.00033309	0.00335687				142.473	142.648	129.417	128.921	125.757	123.848	-0.0123532	-0.00961835	-0.000538717	0.000368992	-0.00262251	-0.0362971	-0.0101768	0.00562284
158	144.067	131.964	128.862	133.813	131.633	135.928	-0.0012744	-0.00268497	-0.00186631	0.0168216	-0.00239308	0.000690081	0.00154882	0.0030935				142.366	142.569	129.314	128.637	125.823	122.363	-0.0130949	-0.0101668	-0.00133416	-0.00183472	-0.00209907	-0.0478523	-0.0127303	0.00730724
159	144.105	132.028	128.634	133.11	131.757	136.856	-0.00101097	-0.00220129	-0.00363235	0.0114796	-0.00145332	0.00752194	0.00178394	0.00251953				142.272	142.3	129.452	128.784	125.834	122.756	-0.0137465	-0.0120345	-0.000268419	-0.000694066	-0.00201183	-0.0447943	-0.0122583	0.00693622
160	144.27	132.231	128.907	133.618	130.952	135.104	0.00013287	-0.000667124	-0.00151776	0.0153398	-0.00755417	-0.00537613	5.95852e-05	0.00328645				142.152	142.391	129.165	128.64	125.412	124.934	-0.0145784	-0.0114027	-0.00248486	-0.00181144	-0.00535871	-0.0278465	-0.0105804	0.00401861
161	144.142	132.28	128.709	134.553	131.767	136.661	-0.000754473	-0.000296807	-0.00305141	0.0224447	-0.00137753	0.00608636	0.00384181	0.00393327				141.92	142.092	129.402	129.333	125.474	126.775	-0.0161867	-0.0134786	-0.000654559	0.00356593	-0.00486698	-0.0135211	-0.00752365	0.00328481
162	144.209	132.285	128.619	135.397	131.644	136.625	-0.000290004	-0.00025902	-0.00374853	0.0288581	-0.00230971	0.00582133	0.0046787	0.00501623				142.208	142.283	129.595	128.822	125.509	125.787	-0.0141902	-0.0121525	0.000835941	-0.000399203	-0.0045894	-0.021209	-0.0086174	0.00353663
163	144.024	132.131	128.569	134.894	131.485	136.383	-0.00157249	-0.00142287	-0.00413582	0.0250359	-0.00351472	0.00403975	0.00307163	0.00454776				141.833	142.253	129.489	128.58	125.164	125.595	-0.0167898	-0.0123608	1.73248e-05	-0.00227701	-0.00732559	-0.0227031	-0.0102398	0.00355828
164	143.975	131.909	128.712	135.124	131.418	137.329	-0.00191218	-0.00310063	-0.00302818	0.0267837	-0.0040225	0.0110041	0.00428738	0.00505564				141.923	142.449	129.513	128.619	125.209	125.461	-0.0161659	-0.011	0.000202672	-0.00197439	-0.0069687	-0.0237458	-0.009942	0.00367712
165	144.034	132.232	128.693	135.13	132.07	136.565	-0.00150317	-0.000659566	-0.00317535	0.0268292	0.000918816	0.00537962	0.0046316	0.00459587				141.588	142.809	129.366	128.529	125.402	125.509	-0.0184881	-0.00850055	-0.000932579	-0.00267275	-0.00543802	-0.0233723	-0.00990072	0.00369582
166	144.018	132.288	128.544	134.772	131.744	135.654	-0.00161409	-0.000236348	-0.00432946	0.0241089	-0.00155184	-0.00132708	0.00250834	0.00435531				141.771	143.02	129.52	128.567	125.297	127.908	-0.0172196	-0.00703562	0.000256732	-0.00237789	-0.00627077	-0.00470483	-0.00622532	0.002454
167	144.004	132.532	128.796	133.794	132.145	136.305	-0.00171114	0.00160768	-0.00237753	0.0166772	0.00148722	0.00346552	0.00319149	0.00284255				141.959	142.746	129.454	128.493	124.962	132.449	-0.0159163	-0.00893795	-0.000252973	-0.0029521	-0.00892765	0.0306302	-0.00105946	0.00671608
168	143.932	132.057	128.718	133.976	131.954	136.72	-0.00221027	-0.00198212	-0.0029817	0.0180602	3.96871e-05	0.00652072	0.00290775	0.00334498				142.204	142.796	129.479	128.419	125.306	130.572	-0.0142179	-0.00859081	-5.99032e-05	-0.0035263	-0.00619939	0.0160247	-0.00276161	0.0042342
169	143.915	132.227	128.643	134.582	132.035	136.432	-0.00232812	-0.000697354	-0.00356263	0.0226651	0.000653562	0.00440049	0.00352184	0.00399031				142.457	142.768	129.289	128.384	125.571	130.663	-0.0124641	-0.00878521	-0.00152723	-0.00379789	-0.00409768	0.0167328	-0.00232322	0.00413796
170	144.394	132.171	128.363	134.398	132.122	136.934	0.000992484	-0.00112057	-0.00573145	0.0212669	0.00131291	0.00809617	0.00413607	0.00388158				142.192	142.999	129.033	128.24	125.295	133.083	-0.0143011	-0.00718141	-0.00350427	-0.00491526	-0.00628663	0.0355636	-0.000104184	0.00729557
171	144.487	132.206	128.795	134.329	131.986	135.583	0.00163719	-0.000856061	-0.00238528	0.0207426	0.000282205	-0.00184978	0.00292848	0.00361203				142.074	142.995	128.99	128.527	125.27	141.544	-0.0151191	-0.00720919	-0.00383635	-0.00268827	-0.00648491	0.101401	0.0110106	0.0181654
172	144.505	132.107	128.575	134.011	131.488	136.259	0.00176198	-0.00160425	-0.00408935	0.0183262	-0.00349199	0.00312687	0.00233824	0.00340302				141.484	142.785	128.963	128.064	125.502	139.222	-0.0192091	-0.00866718	-0.00404487	-0.00628094	-0.00464492	0.0833332	0.0067477	0.0154841
173	144.436	131.954	128.738	133.957	131.433	136.306	0.00128364	-0.00276055	-0.00282679	0.0179158	-0.00390882	0.00347288	0.00219603	0.00334983				141.945	142.541	128.758	128.223	125.264	140.077	-0.0160134	-0.0103612	-0.00562804	-0.00504717	-0.00653249	0.0899863	0.00773399	0.0165351
174	144.391	132.043	128.98	133.231	131.841	136.437	0.000971687	-0.00208793	-0.000952315	0.0123991	-0.000816706	0.00443729	0.00232519	0.0022201				142.781	142.392	128.748	128.011	125.072	143.143	-0.0102181	-0.0113957	-0.00570527	-0.0066922	-0.00805524	0.113844	0.0119629	0.0203946
175	144.429	132.135	128.982	133.389	131.685	135.241	0.00123512	-0.00139264	-0.000936823	0.0135997	-0.00199898	-0.00436755	0.00102313	0.00262097				143.086	142.191	128.728	127.857	125.396	141.573	-0.00810375	-0.0127912	-0.00585972	-0.00788717	-0.0054856	0.101627	0.0102499	0.0183063
176	144.365	132.191	129.169	132.658	131.584	136.221	0.000791445	-0.000969423	0.000511633	0.00804495	-0.00276443	0.00284712	0.00141022	0.0015315				142.029	142.004	128.666	127.777	125.749	136.392	-0.0154311	-0.0140895	-0.00633854	-0.00850793	-0.00268596	0.061312	0.0023765	0.0119467
177	144.301	131.921	129.289	132.611	131.789	136.527	0.000347774	-0.00300994	0.00144112	0.00768781	-0.0012108	0.00509987	0.00172597	0.00163259				141.023	142.021	128.65	127.645	125.421	135.001	-0.0224048	-0.0139715	-0.0064621	-0.00953219	-0.00528733	0.0504882	-0.00119496	0.0106431
178	144.327	132.027	129.13	132.435	132.357	135.977	0.000528015	-0.00220885	0.000209549	0.00635041	0.0030939	0.00105081	0.00150397	0.00119212				141.446	142.058	128.491	127.676	125.136	130.007	-0.0194725	-0.0137146	-0.00769003	-0.00929165	-0.00754766	0.0116282	-0.00768138	0.00428525
179	144.237	132.069	129.159	131.635	131.335	136.471	-9.58978e-05	-0.00189144	0.000434175	0.000271354	-0.00465153	0.0046876	-0.000207622	0.00125433				143.334	142.283	128.882	127.95	125.611	128.135	-0.00638457	-0.0121525	-0.00467041	-0.00716553	-0.00378044	-0.00293847	-0.00618198	0.00135681
180	144.36	131.989	129.236	131.685	132.342	135.901	0.000756784	-0.00249603	0.0010306	0.000651295	0.00298022	0.00049131	0.000569029	0.000718089				145.026	142.546	128.866	127.791	125.78	126.776	0.00534466	-0.0103265	-0.00479398	-0.0083993	-0.0024401	-0.0135133	-0.00568809	0.00272745
181	144.118	131.946	129.012	131.747	132.13	135.082	-0.00092085	-0.00282101	-0.000704451	0.00112242	0.00137354	-0.0055381	-0.00124807	0.00106102				147.287	142.848	128.709	127.601	125.539	125.788	0.0210183	-0.00822978	-0.00600646	-0.00987361	-0.00435147	-0.0212013	-0.00477405	0.00570013
182	144.305	131.765	128.922	131.091	132.178	135.925	0.000375503	-0.00418891	-0.00140157	-0.00386241	0.00173732	0.000667995	-0.00111201	0.00101021				147.399	142.835	128.87	127.565	125.85	125.837	0.0217947	-0.00832004	-0.00476309	-0.010153	-0.00188493	-0.02082	-0.00402438	0.00580187
183	144.035	131.947	129.018	131.188	131.557	136.081	-0.00149624	-0.00281345	-0.000657976	-0.00312532	-0.00296906	0.00181645	-0.00154093	0.000779375				146.002	143.051	128.869	127.582	125.713	127.941	0.0121105	-0.00682039	-0.00477081	-0.010021	-0.00297148	-0.00444805	-0.00282022	0.00314778
184	143.938	131.872	128.577	131.358	132.194	135.813	-0.00216868	-0.00338026	-0.00407385	-0.00183352	0.00185857	-0.000156539	-0.00162571	0.00088898				143.079	143.149	128.61	127.664	125.967	127.188	-0.00815228	-0.00613999	-0.00677101	-0.00938476	-0.000957006	-0.0103074	-0.00695207	0.00135708
185	143.709	132.112	128.562	130.909	131.578	135.243	-0.00375619	-0.00156646	-0.00419004	-0.00524539	-0.0028099	-0.00435283	-0.00365347	0.000528803				142.425	143.138	128.425	127.427	126.048	126.222	-0.0126859	-0.00621636	-0.00819973	-0.0112238	-0.000314596	-0.0178242	-0.00941076	0.00244411
186	143.785	132.094	128.667	131.482	131.314	135.096	-0.00322933	-0.0017025	-0.00337674	-0.000891266	-0.00481068	-0.00543503	-0.00324092	0.000711441				144.136	143.161	128.444	127.47	125.288	128.326	-0.000824974	-0.00605668	-0.008053	-0.0108901	-0.00634215	-0.00145223	-0.00560319	0.00157868
187	143.574	131.849	128.513	131.006	132.125	135.365	-0.00469206	-0.00355408	-0.00456958	-0.00450831	0.00133564	-0.00345468	-0.00324051	0.00094103				146.658	143.117	128.447	127.504	126.055	132.543	0.016658	-0.00636216	-0.00802983	-0.0106263	-0.000259079	0.0313617	0.00379038	0.00681366
188	143.671	132.158	128.53	131.473	130.952	135.019	-0.00401962	-0.00121882	-0.00443791	-0.000959656	-0.00755417	-0.0060019	-0.00403201	0.00106151				148.629	143.128	128.433	127.766	125.941	139.204	0.0303213	-0.00628579	-0.00813795	-0.00859329	-0.00116321	0.0831931	0.014889	0.0149347
189	143.571	132.005	128.593	130.845	131.41	134.577	-0.00471286	-0.00237511	-0.00394992	-0.00573172	-0.00408313	-0.00925586	-0.0050181	0.000958499				150.131	142.896	128.356	127.601	126.027	128.857	0.0407334	-0.00789653	-0.0087326	-0.00987361	-0.000481147	0.00267966	0.00273819	0.00786921
190	143.43	132.07	128.555	130.805	131.907	135.164	-0.00569032	-0.00188388	-0.00424426	-0.00603567	-0.000316512	-0.00493442	-0.00385084	0.000928197				142.997	142.852	128.422	127.646	125.846	123.406	-0.00872071	-0.00820201	-0.0082229	-0.00952443	-0.00191666	-0.0397364	-0.0127205	0.00551797
191	143.467	132.049	128.519	131.076	131.556	134.964	-0.00543382	-0.00204258	-0.00452311	-0.00397639	-0.00297664	-0.0064068	-0.00422656	0.000650475				141.297	142.527	128.24	127.847	125.834	121.901	-0.0205054	-0.0104584	-0.00962845	-0.00796476	-0.00201183	-0.0514473	-0.0170027	0.00730826
192	143.528	131.872	128.553	131.26	131.493	134.455	-0.00501095	-0.00338026	-0.00425975	-0.00257821	-0.00345409	-0.010154	-0.00480621	0.00112198				140.113	142.363	128.175	127.724	126.659	122.754	-0.0287131	-0.0115971	-0.0101304	-0.00891919	0.00453124	-0.0448098	-0.0166064	0.00710617
193	143.491	131.824	128.396	131.094	130.865	134.915	-0.00526745	-0.00374302	-0.00547584	-0.00383961	-0.00821352	-0.00676754	-0.00555116	0.000703625				139.059	142.594	128.172	127.522	125.713	125.284	-0.0360196	-0.00999326	-0.0101536	-0.0104866	-0.00297148	-0.0251231	-0.0157913	0.00501383
194	143.758	131.778	128.501	131.25	131.51	134.65	-0.0034165	-0.00409066	-0.00466253	-0.00265419	-0.00332526	-0.00871844	-0.00447793	0.000893445				137.414	142.805	128.423	127.452	125.896	125.934	-0.047423	-0.00852832	-0.00821518	-0.0110298	-0.00152011	-0.0200652	-0.0161303	0.0067197
195	144.635	132.035	128.531	131.628	131.752	134.914	0.00266319	-0.00214839	-0.00443016	0.000218162	-0.00149121	-0.0067749	-0.00199389	0.001362				137.281	143.149	128.326	127.409	126.446	131.363	-0.048345	-0.00613999	-0.00896429	-0.0113634	0.00284194	0.0221797	-0.00829851	0.00943618
196	145.137	131.837	128.494	130.79	131.01	134.71	0.00614323	-0.00364477	-0.00471675	-0.00614965	-0.00711461	-0.00827673	-0.00395988	0.00213016				137.858	143.246	128.325	127.485	125.918	129.99	-0.0443451	-0.00546653	-0.00897201	-0.0107737	-0.00134562	0.0114959	-0.00990118	0.00761295
197	145.394	131.777	128.434	130.81	131.389	134.222	0.00792485	-0.00409822	-0.0051815	-0.00599768	-0.00424228	-0.0118693	-0.00391069	0.00264283				137.744	143.353	128.395	127.586	125.87	129.66	-0.0451354	-0.00472365	-0.00843142	-0.00999001	-0.00172631	0.00892807	-0.0101798	0.0075085
198	145.372	131.792	128.533	130.207	131.487	134.916	0.00777234	-0.00398486	-0.00441467	-0.0105798	-0.00349957	-0.00676017	-0.00357778	0.002509				138.414	143.532	128.338	127.399	126.178	126.754	-0.0404908	-0.00348088	-0.00887162	-0.011441	0.000716433	-0.0136845	-0.0128754	0.00592832
199	145.634	131.717	128.525	130.594	131.885	134.987	0.00958862	-0.00455167	-0.00447663	-0.00763902	-0.000483243	-0.00623748	-0.0022999	0.00257201				138.116	144.046	128.409	127.405	126.065	122.739	-0.0425566	8.77343e-05	-0.0083233	-0.0113945	-0.000179769	-0.0449266	-0.0178822	0.00838646
200	145.432	131.755	128.416	129.824	131.081	134.215	0.00818828	-0.00426448	-0.00532092	-0.0134901	-0.00657652	-0.0119209	-0.00556411	0.00313651				138.353	143.979	128.397	127.319	125.94	120.225	-0.0409137	-0.000377436	-0.00841597	-0.0120618	-0.00117114	-0.0644888	-0.0212381	0.0105581
201	145.344	131.735	128.393	130.054	131.502	135.167	0.00757823	-0.00441563	-0.00549907	-0.0117424	-0.00338588	-0.00491233	-0.00372951	0.00256379				138.457	143.798	128.349	127.669	125.999	118.075	-0.0401928	-0.00163409	-0.00878666	-0.00934596	-0.000703214	-0.0812187	-0.0236469	0.0129417
202	145.348	131.812	128.792	129.792	131.536	134.101	0.00760596	-0.00383371	-0.00240852	-0.0137333	-0.00312821	-0.0127601	-0.00470965	0.00319622				138.751	143.479	128.564	127.359	126.125	118.15	-0.0381547	-0.00384885	-0.00712626	-0.0117514	0.00029609	-0.0806351	-0.0235367	0.0126987
203	145.28	131.84	129.133	129.747	131.913	134.878	0.00713456	-0.0036221	0.000232786	-0.0140752	-0.00027104	-0.00703993	-0.00294016	0.00294366				138.566	143.411	128.579	127.356	126.134	119.044	-0.0394372	-0.00432097	-0.00701042	-0.0117747	0.000367469	-0.0736786	-0.0226424	0.0117109
204	145.132	131.962	129.136	129.822	131.4	135.269	0.00610857	-0.00270009	0.000256023	-0.0135053	-0.00415891	-0.00416142	-0.00302686	0.00262493				138.675	143.059	128.531	127.241	125.926	123.634	-0.0386815	-0.00676484	-0.00738112	-0.0126671	-0.00128218	-0.0379623	-0.0174565	0.00676107
205	144.926	131.926	129.077	129.522	131.272	134.871	0.0046805	-0.00297215	-0.000200977	-0.015785	-0.00512899	-0.00709146	-0.00441634	0.00282558				138.308	142.993	128.443	127.323	126.159	127.873	-0.0412257	-0.00722307	-0.00806072	-0.0120308	0.000565744	-0.00497718	-0.0121586	0.00605404
206	144.602	132.104	129.084	128.99	131.406	135.187	0.00243442	-0.00162692	-0.000146756	-0.0198275	-0.00411344	-0.0047651	-0.00467422	0.00321591				138.32	142.879	128.4	127.198	126.259	126.159	-0.0411425	-0.00801456	-0.0083928	-0.0130007	0.00135884	-0.0183144	-0.0145843	0.005937
207	144.553	132.058	129.054	129.375	131.933	135.013	0.00209473	-0.00197457	-0.000379129	-0.016902	-0.000119466	-0.00604607	-0.00388775	0.00282837				137.954	142.734	128.414	127.142	125.933	126.961	-0.0436796	-0.00902127	-0.00828468	-0.0134352	-0.00122666	-0.0120738	-0.0146202	0.00606414
208	144.565	132.006	128.99	129.729	131.151	134.882	0.00217792	-0.00236756	-0.000874857	-0.014212	-0.00604601	-0.00701048	-0.00472216	0.00234523				137.772	142.568	128.294	127.091	125.839	131.425	-0.0449413	-0.0101738	-0.00921142	-0.013831	-0.00197217	0.0226621	-0.00957792	0.00888147
209	144.936	132.157	128.868	130.531	131.39	135.409	0.00474983	-0.00122638	-0.00181984	-0.00811775	-0.0042347	-0.00313075	-0.0022966	0.00172591				137.611	142.587	128.265	127.284	126.371	131.178	-0.0460574	-0.0100419	-0.00943538	-0.0123334	0.00224711	0.0207401	-0.00914679	0.00893771
210	144.809	131.987	128.767	130.655	131.215	134.502	0.00386942	-0.00251115	-0.00260216	-0.00717549	-0.00556097	-0.00980801	-0.00396473	0.00193515				137.859	142.222	127.987	127.419	126.292	131.804	-0.0443382	-0.012576	-0.0115823	-0.0112859	0.00162057	0.0256113	-0.00875842	0.00928054
211	144.618	131.94	128.487	130.867	131.645	134.252	0.00254533	-0.00286635	-0.00477097	-0.00556454	-0.00230213	-0.0116485	-0.00410119	0.00190166				137.79	142.351	128.055	127.308	126.023	132.214	-0.0448165	-0.0116804	-0.0110572	-0.0121472	-0.000512871	0.0288016	-0.00856875	0.00966785
212	144.602	132.031	128.592	130.52	130.929	135.156	0.00243442	-0.00217862	-0.00395767	-0.00820134	-0.00772848	-0.00499332	-0.00410417	0.00160411				137.719	142.521	128.231	127.264	126.364	132.596	-0.0453087	-0.0105001	-0.00969795	-0.0124886	0.0021916	0.0317741	-0.00733828	0.0101726
213	144.522	132.089	128.582	130.939	131.052	134.966	0.00187983	-0.00174029	-0.00403513	-0.00501743	-0.0067963	-0.00639208	-0.00368357	0.00133736				137.96	143.034	128.009	127.281	125.935	128.411	-0.043638	-0.00693842	-0.0114124	-0.0123567	-0.0012108	-0.000790817	-0.0127245	0.00649605
214	144.49	131.846	128.586	130.271	131.176	135.087	0.00165799	-0.00357675	-0.00400414	-0.0100934	-0.00585654	-0.00550129	-0.00456236	0.00156125				137.558	142.87	127.846	127.322	125.731	129.177	-0.0464248	-0.00807704	-0.0126712	-0.0120385	-0.00282872	0.00516969	-0.0128118	0.00724767
215	144.514	132.026	128.383	130.584	131.692	134.569	0.00182437	-0.00221641	-0.00557653	-0.00771501	-0.00194593	-0.00931476	-0.00415738	0.00169025				137.698	142.902	127.884	126.997	125.921	126.988	-0.0454543	-0.00785487	-0.0123778	-0.0145604	-0.00132183	-0.0118637	-0.0155721	0.00627309
216	144.549	132.088	128.326	130.112	130.719	134.756	0.002067	-0.00174784	-0.00601804	-0.0113017	-0.00932001	-0.00793808	-0.00570977	0.00204563				137.798	142.772	127.994	126.98	125.85	131.464	-0.0447611	-0.00875744	-0.0115283	-0.0146923	-0.00188493	0.0229656	-0.0097764	0.00891911
217	144.562	132.402	128.296	130.541	130.472	135.333	0.00215712	0.000625205	-0.00625041	-0.00804176	-0.0111919	-0.00369026	-0.00439867	0.00209419				137.73	142.725	127.908	126.815	125.286	129.569	-0.0452324	-0.00908375	-0.0121924	-0.0159726	-0.00635801	0.00821997	-0.0134365	0.0072042
218	144.257	132.332	128.378	131.014	130.681	134.713	4.27496e-05	9.61815e-05	-0.00561526	-0.00444752	-0.009608	-0.00825464	-0.00463108	0.00166427				138.391	142.696	127.852	126.907	125.463	125.693	-0.0406503	-0.00928509	-0.0126249	-0.0152587	-0.00495422	-0.0219405	-0.0174523	0.00519394
219	144.415	132.375	128.37	131.445	130.909	134.485	0.00113806	0.000421153	-0.00567723	-0.00117242	-0.00788005	-0.00993316	-0.00385061	0.00188748				138.379	142.826	128.075	127.007	125.525	124.535	-0.0407335	-0.00838253	-0.0109027	-0.0144828	-0.0044625	-0.0309513	-0.0183192	0.00583791
220	144.382	132.588	128.256	132.017	130.546	134.53	0.000909296	0.0020309	-0.00656024	0.00317411	-0.0106311	-0.00960187	-0.00344649	0.00252989				138.406	142.991	128.003	126.848	125.445	124.951	-0.0405463	-0.00723696	-0.0114588	-0.0157166	-0.00509698	-0.0277142	-0.0179616	0.00557682
221	144.416	132.904	128.166	131.781	130.158	134.542	0.001145	0.00441906	-0.00725736	0.00138078	-0.0135717	-0.00951353	-0.00389962	0.00293752				138.504	143.035	127.927	126.778	124.9	125.295	-0.0398669	-0.00693147	-0.0120457	-0.0162597	-0.00941937	-0.0250375	-0.0182601	0.00503953
222	144.451	132.736	128.219	131.982	130.573	134.585	0.00138763	0.0031494	-0.00684684	0.00290815	-0.0104265	-0.00919697	-0.00317085	0.00258296				139.766	143.255	128.348	126.742	124.986	131.209	-0.0311186	-0.00540405	-0.00879439	-0.0165391	-0.00873731	0.0209814	-0.00826867	0.00696367
223	144.305	133.05	128.286	131.841	130.408	134.08	0.000375503	0.00552245	-0.00632787	0.00183671	-0.011677	-0.0129147	-0.00386415	0.00309627				139.551	143.552	128.188	127.029	125.148	125.146	-0.032609	-0.00334203	-0.01003	-0.0143121	-0.00745249	-0.0261969	-0.0156571	0.00465798
224	144.19	133.06	128.18	131.739	130.915	134.198	-0.000421719	0.00559803	-0.00714892	0.00106163	-0.00783458	-0.012046	-0.00346527	0.00269684				137.644	143.736	128.371	126.807	125.142	123.718	-0.0458286	-0.00206454	-0.00861676	-0.0160347	-0.00750007	-0.0373086	-0.0195589	0.00727729
225	144.019	132.964	128.183	130.609	129.993	134.434	-0.00160715	0.00487251	-0.00712568	-0.00752504	-0.0148221	-0.0103086	-0.00608602	0.00281337				136.82	143.615	128.474	126.919	124.892	123.725	-0.0515407	-0.00290463	-0.00782131	-0.0151656	-0.00948282	-0.0372542	-0.0206949	0.00788285
226	144.004	133.237	128.265	130.297	130.238	133.856	-0.00171114	0.0069357	-0.00649053	-0.00989587	-0.0129654	-0.0145638	-0.0064485	0.00327512				136.348	143.343	128.313	126.752	125.004	120.423	-0.0548127	-0.00479308	-0.00906469	-0.0164615	-0.00859455	-0.0629481	-0.0261124	0.0105289
227	143.792	133.204	128.063	130.897	130.488	133.837	-0.0031808	0.0066863	-0.00805517	-0.00533658	-0.0110707	-0.0147037	-0.00594344	0.00302765				136.355	143.23	128.354	126.986	125.36	120.053	-0.0547642	-0.00557762	-0.00874805	-0.0146457	-0.00577112	-0.0658272	-0.025889	0.0110549
228	143.901	133.268	128.119	131.468	131.247	134.129	-0.00242517	0.00716998	-0.00762141	-0.00099765	-0.00531845	-0.012554	-0.00362445	0.0027291				137.437	143.227	128.405	126.831	124.778	121.424	-0.0472636	-0.00559845	-0.00835419	-0.0158485	-0.010387	-0.055159	-0.0237684	0.00884482
229	143.999	132.906	127.91	130.934	130.627	133.476	-0.0017458	0.00443417	-0.00924027	-0.00505542	-0.0100172	-0.0173613	-0.00649765	0.00306645				138.069	142.987	128.312	126.907	125.351	123.805	-0.0428824	-0.00726473	-0.00907241	-0.0152587	-0.0058425	-0.0366317	-0.0194921	0.00659086
230	143.917	133.286	127.952	130.819	130.96	133.14	-0.00231426	0.00730602	-0.00891495	-0.00592929	-0.00749354	-0.0198349	-0.00619683	0.00361727				137.038	143.286	128.308	126.819	125.891	128.634	-0.0500295	-0.00518882	-0.0091033	-0.0159416	-0.00155976	0.000944421	-0.0134798	0.00770277
231	143.832	133.21	127.923	131.587	129.898	133.407	-0.00290351	0.00673165	-0.00913958	-9.33896e-05	-0.0155421	-0.0178693	-0.00646937	0.00386022				136.581	143.264	128.37	126.694	125.24	128.629	-0.0531975	-0.00534156	-0.00862449	-0.0169115	-0.00672284	0.000905514	-0.0149821	0.00799611
232	143.919	133.103	128.162	132.095	130.746	133.413	-0.00230039	0.005923	-0.00728834	0.00376681	-0.00911538	-0.0178251	-0.00447324	0.00359837				138.174	143.611	128.413	126.929	125.751	129.663	-0.0421546	-0.0029324	-0.00829241	-0.015088	-0.0026701	0.00895142	-0.0103643	0.00712918
233	143.686	132.576	128.2	130.801	130.844	133.789	-0.00391563	0.00194021	-0.00699401	-0.00606607	-0.00837267	-0.0150571	-0.00641087	0.00227326				140.524	143.672	128.251	126.654	125.791	131.121	-0.025864	-0.00250889	-0.0095435	-0.0172219	-0.00235286	0.0202966	-0.00619909	0.00645453
234	143.701	132.836	128.107	130.755	130.923	133.11	-0.00381165	0.00390515	-0.00771436	-0.00641561	-0.00777395	-0.0200558	-0.0069777	0.00316749				144.157	144.142	128.394	126.717	125.942	130.594	-0.000679399	0.000754247	-0.00843914	-0.0167331	-0.00115528	0.0161958	-0.00167613	0.00446851
235	143.671	132.928	127.985	131.175	129.886	133.189	-0.00401962	0.00460044	-0.00865934	-0.00322411	-0.0156331	-0.0194742	-0.00773498	0.00359332				144.936	144.509	128.452	126.581	125.826	126.717	0.00472076	0.00330227	-0.00799122	-0.0177884	-0.00207528	-0.0139724	-0.00563404	0.00375303
236	143.537	132.849	127.828	130.908	130.556	133.783	-0.00494856	0.0040034	-0.00987543	-0.00525299	-0.0105553	-0.0151012	-0.00695502	0.0026762				145.322	144.891	128.289	126.93	125.9	124.109	0.00739658	0.00595443	-0.00925003	-0.0150803	-0.00148838	-0.0342661	-0.00778897	0.00636531
237	143.445	132.615	127.927	131.168	130.835	133.396	-0.00558633	0.00223495	-0.0091086	-0.0032773	-0.00844088	-0.0179503	-0.00702141	0.00275421				145.474	144.778	128.164	126.738	126.612	124.294	0.00845027	0.00516989	-0.0102154	-0.0165701	0.00415848	-0.0328266	-0.00697224	0.00653264
238	143.361	132.693	128.237	130.467	130.401	133.962	-0.00616865	0.00282443	-0.00670741	-0.00860407	-0.01173	-0.0137834	-0.00736153	0.00236272				145.863	144.838	128.331	126.695	125.97	123.848	0.0111469	0.00558646	-0.00892567	-0.0169038	-0.000933213	-0.0362971	-0.00772106	0.00702739
239	143.628	132.609	128.544	130.36	130.155	134.102	-0.00431771	0.0021896	-0.00432946	-0.00941715	-0.0135944	-0.0127528	-0.00703698	0.00245757				147.069	145.088	128.407	126.668	126.103	123.986	0.0195071	0.00732217	-0.00833874	-0.0171133	0.000121609	-0.0352232	-0.00562073	0.00784787
240	143.652	132.892	128.747	129.76	130.322	134.162	-0.00415133	0.00432837	-0.00275708	-0.0139764	-0.0123288	-0.0123111	-0.00686605	0.00294174				148.144	144.882	128.491	126.716	126.902	125.141	0.0269592	0.00589195	-0.00769003	-0.0167408	0.00645847	-0.0262358	-0.00189284	0.00776624
241	143.486	132.821	128.57	129.998	130.712	134.301	-0.00530211	0.00379179	-0.00412808	-0.0121679	-0.00937306	-0.0112878	-0.00641119	0.00242375				147	144.524	128.466	126.893	126.669	127.624	0.0190288	0.00340641	-0.0078831	-0.0153674	0.00461055	-0.00691473	-0.000519914	0.00496469
242	143.431	132.545	128.626	129.537	130.035	133.955	-0.00568339	0.00170592	-0.00369431	-0.015671	-0.0145038	-0.013835	-0.00861359	0.00289276				147.096	144.692	128.554	126.683	126.414	127.58	0.0196942	0.00457281	-0.00720349	-0.0169969	0.00258815	-0.00725711	-0.000767047	0.00518135
243	143.537	132.33	128.503	130.225	129.798	134.664	-0.00494856	8.10665e-05	-0.00464704	-0.010443	-0.0163	-0.00861538	-0.00747881	0.00230553				146.467	144.711	128.757	126.493	126.724	131.94	0.0153339	0.00470472	-0.00563576	-0.0184712	0.00504675	0.0266695	0.00460799	0.00642791
244	143.373	132.602	128.305	131.092	130.359	134.656	-0.00608546	0.0021367	-0.0061807	-0.00385481	-0.0120483	-0.00867427	-0.00578448	0.00195195				146.049	145.213	128.693	126.536	126.645	136.359	0.0124363	0.00819002	-0.00613002	-0.0181375	0.0044202	0.0610552	0.0103057	0.011103
245	143.512	132.466	128.333	131.632	130.411	135.671	-0.00512187	0.00110888	-0.00596382	0.000248558	-0.0116542	-0.00120193	-0.00376407	0.00196086				145.171	146.033	128.651	126.787	126.605	137.437	0.00634982	0.0138831	-0.00645438	-0.0161899	0.00410297	0.0694435	0.0118559	0.0122919
246	143.512	132.626	128.287	131.525	130.264	134.458	-0.00512187	0.00231808	-0.00632012	-0.000564517	-0.0127683	-0.0101319	-0.00543145	0.00231338				144.848	146.498	128.849	126.693	126.778	132.514	0.00411073	0.0171116	-0.00492527	-0.0169193	0.00547503	0.031136	0.00599813	0.00684053
247	143.43	132.428	128.299	132.349	129.782	135.43	-0.00569032	0.000821699	-0.00622718	0.00569692	-0.0164212	-0.00297615	-0.00413271	0.00305683				144.779	146.555	128.649	127.017	126.516	131.56	0.00363241	0.0175073	-0.00646983	-0.0144052	0.00339711	0.0237126	0.0045624	0.00582524
248	143.59	132.292	128.356	131.435	130.438	135.669	-0.00458114	-0.000206118	-0.00578567	-0.00124841	-0.0114496	-0.00121665	-0.00408127	0.00171945				144.829	146.769	128.819	127.131	126.696	129.464	0.00397902	0.0189931	-0.00515695	-0.0135206	0.00482469	0.00740293	0.00275369	0.00454076
249	143.582	131.957	128.4	131.22	130.217	136.971	-0.0046366	-0.00273787	-0.00544485	-0.00288216	-0.0131245	0.00836856	-0.00340957	0.00282537				144.118	146.562	128.635	127.316	126.441	129.33	-0.000949753	0.0175559	-0.00657794	-0.0120851	0.00280228	0.00636023	0.00118427	0.00423604
250	143.617	132.334	128.363	131.377	130.722	136.206	-0.00439397	0.000111296	-0.00573145	-0.00168914	-0.00929727	0.00273669	-0.00304397	0.00176405				143.604	146.671	128.454	127.192	126.496	126.064	-0.00451289	0.0183127	-0.00797577	-0.0130473	0.00323849	-0.0190536	-0.00383973	0.00539948
251	143.435	132.456	128.288	131.419	129.708	135.28	-0.00565566	0.00103331	-0.00631238	-0.00136999	-0.0169821	-0.00408044	-0.0055612	0.00254464				143.019	146.396	128.297	127.099	126.399	123.704	-0.00856821	0.0164034	-0.00918825	-0.0137689	0.00246918	-0.0374176	-0.00834506	0.00731397
252	143.385	132.491	128.444	131.285	130.682	136.162	-0.00600228	0.00129782	-0.00510404	-0.00238823	-0.00960042	0.00241277	-0.00323073	0.00186932				143.34	146.02	128.233	127.108	126.286	122.84	-0.00634298	0.0137929	-0.00968251	-0.0136991	0.00157298	-0.0441406	-0.00974989	0.00794229
253	143.283	132.215	128.433	131.217	130.414	135.965	-0.00670938	-0.000788043	-0.00518924	-0.00290495	-0.0116315	0.000962472	-0.00437678	0.00184648				142.568	146.067	128.407	127.005	126.213	125.516	-0.0116946	0.0141192	-0.00833874	-0.0144983	0.000994017	-0.0233178	-0.0071227	0.00534216
254	143.315	132.145	128.53	131.78	130.807	136.896	-0.00648754	-0.00131707	-0.00443791	0.00137318	-0.00865308	0.00781641	-0.001951	0.00243952				142.749	145.893	128.173	127.266	126.71	124.533	-0.0104399	0.0129112	-0.0101459	-0.0124731	0.00493572	-0.0309668	-0.00769647	0.00622387
255	143.52	132.131	128.819	131.286	129.994	135.83	-0.00506641	-0.00142287	-0.00219938	-0.00238064	-0.0148146	-3.13863e-05	-0.00431921	0.00220406				142.937	145.681	128.073	126.895	126.593	123.927	-0.00913664	0.0114393	-0.0109182	-0.0153519	0.00400779	-0.0356823	-0.00927365	0.00668956
256	143.674	132.374	128.581	132.912	130.905	135.351	-0.00399882	0.000413596	-0.00404287	0.00997505	-0.00791037	-0.00355774	-0.00152019	0.00253886				142.111	145.494	128.356	127.211	126.114	123.941	-0.0148626	0.010141	-0.0087326	-0.0128998	0.000208849	-0.0355734	-0.0102864	0.00631676
257	143.821	132.461	128.606	132.022	130.519	135.705	-0.00297976	0.0010711	-0.00384923	0.0032121	-0.0108357	-0.000951625	-0.00238886	0.00199365				136.53	145.236	128.213	127.346	126.435	123.805	-0.053551	0.00834971	-0.00983696	-0.0118523	0.0027547	-0.0366317	-0.0167946	0.00971561
258	143.876	132.288	128.634	132.476	130.843	135.708	-0.00259848	-0.000236348	-0.00363235	0.00666197	-0.00838025	-0.00092954	-0.00151917	0.00201353				135.765	145.114	128.235	127.788	126.657	124.632	-0.0588542	0.00750268	-0.00966706	-0.00842258	0.00451538	-0.0301965	-0.0158537	0.0101795
259	143.741	131.775	128.65	132.16	129.902	136.736	-0.00353435	-0.00411333	-0.00350841	0.00426074	-0.0155118	0.00663851	-0.00262811	0.00317867				135.798	144.749	128.497	127.835	126.711	121.785	-0.0586254	0.00496855	-0.00764369	-0.00805788	0.00494365	-0.05235	-0.0194608	0.0116585
260	143.67	132.068	128.542	131.55	130.744	136.002	-0.00402655	-0.00189899	-0.00434496	-0.000374546	-0.00913054	0.00123486	-0.00309012	0.00148814				136.106	144.928	128.566	128.246	126.335	121.808	-0.0564903	0.00621132	-0.00711082	-0.0048687	0.0019616	-0.052171	-0.0187446	0.0114331
261	143.598	132.176	128.447	131.992	130.604	135.73	-0.00452568	-0.00108279	-0.0050808	0.00298413	-0.0101916	-0.000767578	-0.00311071	0.00185087				136.519	144.706	128.567	128.51	126.773	121.544	-0.0536273	0.00467001	-0.00710309	-0.00282018	0.00543537	-0.0542253	-0.0179451	0.0115382
262	143.285	131.979	128.367	133.94	130.431	135.195	-0.00669551	-0.00257161	-0.00570046	0.0177866	-0.0115027	-0.0047062	-0.00223164	0.00418283				137.846	144.696	128.846	128.352	126.678	122.713	-0.0444283	0.00460058	-0.00494843	-0.00404619	0.00468193	-0.0451289	-0.0148782	0.00960255
263	143.323	131.786	128.409	135.557	130.514	134.561	-0.00643208	-0.0040302	-0.00537514	0.0300739	-0.0108736	-0.00937365	-0.0010018	0.00630087				137.888	144.258	129.191	128.646	126.413	126.126	-0.0441372	0.00155962	-0.00228407	-0.00176488	0.00258022	-0.0185712	-0.0104362	0.00743171
264	143.362	131.662	128.385	135.61	130.531	135.026	-0.00616172	-0.00496733	-0.00556104	0.0304767	-0.0107448	-0.00595036	-0.000484762	0.00624991				138.489	144.322	129.387	128.827	126.113	124.007	-0.0399709	0.00200396	-0.000770401	-0.000360405	0.000200918	-0.0350598	-0.0123261	0.0080001
265	143.222	131.844	128.24	135.81	130.608	135.795	-0.00713225	-0.00359187	-0.00668417	0.0319964	-0.0101612	-0.000289053	0.000689643	0.00641015				137.664	143.986	129.831	128.488	126.367	122.688	-0.04569	-0.000328836	0.00265852	-0.00299089	0.00221539	-0.0453234	-0.0149099	0.0097108
266	143.215	131.826	128.349	135.536	129.865	134.973	-0.00718078	-0.0037279	-0.00583989	0.0299144	-0.0157922	-0.00634055	-0.00149449	0.00650802				136.849	144.206	129.873	128.838	126.618	124.84	-0.0513397	0.00119859	0.00298288	-0.00027505	0.00420607	-0.028578	-0.0119675	0.00934743
267	143.342	132.081	128.407	132.708	130.176	134.576	-0.00630037	-0.00180075	-0.00539063	0.00842489	-0.0134352	-0.00926322	-0.00462755	0.00305943				137.456	143.721	129.918	128.563	126.668	125.054	-0.0471319	-0.00216869	0.0033304	-0.00240893	0.00460262	-0.0269128	-0.0117815	0.00847676
268	143.147	131.542	128.402	132.429	130.38	135.18	-0.00765218	-0.00587423	-0.00542936	0.00630482	-0.0118892	-0.00481663	-0.00489279	0.00247122				137.368	143.658	130.049	128.76	126.233	123.699	-0.0477419	-0.00260609	0.00434209	-0.000880295	0.00115264	-0.0374565	-0.013865	0.00923146
269	143.201	131.689	128.364	133.506	130.592	134.766	-0.00727783	-0.00476328	-0.0057237	0.0144888	-0.0102825	-0.00786446	-0.0035705	0.00369427				140.113	143.637	130.005	128.731	126.559	125.708	-0.0287131	-0.00275189	0.00400229	-0.00110532	0.00373814	-0.0218238	-0.00777561	0.00570598
270	143.218	131.762	128.122	131.441	129.622	134.367	-0.00715998	-0.00421158	-0.00759817	-0.00120282	-0.0176338	-0.0108019	-0.00810138	0.00232394				138.764	143.557	129.8	128.722	126.599	127.83	-0.0380646	-0.00330731	0.00241911	-0.00117516	0.00405538	-0.00531177	-0.00689739	0.00639349
271	143.237	131.77	128.141	132.069	130.434	133.71	-0.00702827	-0.00415112	-0.007451	0.00356924	-0.0114799	-0.0156386	-0.00702995	0.00267532				138.374	143.256	129.851	128.919	126.489	130.604	-0.0407681	-0.00539711	0.00281298	0.000353473	0.00318297	0.0162737	-0.00392369	0.00792001
272	143.461	131.88	128.25	132.562	130.361	134.384	-0.00547542	-0.0033198	-0.00660672	0.00731546	-0.0120332	-0.0106767	-0.00513273	0.00282186				137.718	143.085	128.412	128.522	126.125	129.267	-0.0453156	-0.00658433	-0.00830013	-0.00272707	0.00029609	0.00587001	-0.00946018	0.00746272
273	143.344	131.711	128.311	133.127	130.026	134.045	-0.0062865	-0.00459701	-0.00613423	0.0116088	-0.014572	-0.0131724	-0.00552556	0.003811				138.277	143.223	128.47	128.401	126.628	126.551	-0.0414405	-0.00562622	-0.00785221	-0.00366597	0.00428538	-0.0152641	-0.0115939	0.00650361
274	143.462	131.547	128.264	133.394	130.004	134.481	-0.00546848	-0.00583644	-0.00649828	0.0136377	-0.0147388	-0.00996261	-0.00481115	0.00395721				138.88	143.099	130.718	128.624	126.751	124.902	-0.0372605	-0.00648713	0.00950864	-0.00193559	0.00526089	-0.0280955	-0.00983486	0.00766219
275	143.66	131.737	128.173	134.539	130.297	133.702	-0.00409587	-0.00440052	-0.00720314	0.0223383	-0.0125182	-0.0156975	-0.00359616	0.00551529				138.934	142.837	131.428	128.586	126.77	122.579	-0.0368861	-0.00830615	0.0149918	-0.00223046	0.00541158	-0.0461716	-0.0121985	0.00987858
276	143.733	131.801	128.182	136.739	130.421	133.805	-0.00358981	-0.00391684	-0.00713343	0.0390558	-0.0115785	-0.0149393	-0.00035034	0.00808491				139.905	142.878	131.223	128.512	126.646	123.652	-0.030155	-0.0080215	0.0134087	-0.00280466	0.00442814	-0.0378222	-0.0101611	0.00814855
277	143.693	131.818	128.135	136.677	129.753	133.77	-0.00386711	-0.00378836	-0.00749748	0.0385846	-0.016641	-0.0151969	-0.00140105	0.0083074				141.025	142.632	131.308	128.542	126.759	123.314	-0.022391	-0.00972944	0.0140651	-0.00257188	0.00532434	-0.0404523	-0.00929252	0.00805624
278	143.687	131.559	128.088	139.436	130.43	133.976	-0.0039087	-0.00574575	-0.00786153	0.0595498	-0.0115103	-0.0136804	0.0028072	0.0114435				142.944	142.479	131.52	128.874	127.087	125.524	-0.00908812	-0.0107917	0.0157023	4.29362e-06	0.0079257	-0.0232555	-0.0032505	0.00573254
279	143.585	131.798	128.154	139.336	130.58	133.286	-0.0046158	-0.00393951	-0.00735031	0.0587899	-0.0103734	-0.0187601	0.00229179	0.0115111				143.487	142.478	131.203	128.168	127.005	129.232	-0.00532395	-0.0107986	0.0132542	-0.00547395	0.00727536	0.00559766	0.000755115	0.00379226
280	143.651	131.678	128.218	138.339	131.064	134.037	-0.00415827	-0.00484641	-0.00685458	0.0512139	-0.00670536	-0.0132313	0.00256966	0.00981671				142.487	142.427	130.741	128.109	126.591	127.514	-0.0122561	-0.0111527	0.00968627	-0.00593176	0.00399193	-0.00777068	-0.00390551	0.00359817
281	143.798	131.989	128.396	137.902	131.574	133.613	-0.00313921	-0.00249603	-0.00547584	0.0478932	-0.00284022	-0.0163527	0.00293152	0.00924436				144.372	142.348	130.757	128.051	126.72	132.95	0.000811017	-0.0117012	0.00980983	-0.00638182	0.00501503	0.0345287	0.00534692	0.0066342
282	143.573	131.553	128.437	137.27	132.409	133.725	-0.00469899	-0.00579109	-0.00515826	0.0430907	0.003488	-0.0155282	0.00256703	0.00847111				143.929	142.238	130.487	128.15	126.723	141.093	-0.00225993	-0.0124649	0.00772468	-0.00561362	0.00503882	0.0978921	0.0150529	0.0168329
283	143.332	131.659	128.604	137.28	131.436	134.192	-0.00636969	-0.00499	-0.00386472	0.0431667	-0.00388608	-0.0120902	0.00199434	0.00832904				144.257	142.239	130.235	127.713	126.696	139.039	1.38181e-05	-0.012458	0.00577853	-0.00900454	0.00482469	0.0819092	0.011844	0.0143299
284	143.42	131.76	128.674	136.984	131.567	133.788	-0.00575964	-0.0042267	-0.00332252	0.0409175	-0.00289327	-0.0150644	0.00160849	0.00807486				143.057	142.231	130.1	127.549	126.509	140.141	-0.00830478	-0.0125135	0.00473595	-0.0102771	0.00334159	0.0904843	0.0112444	0.0161179
285	143.305	131.91	128.705	136.529	131.773	134.255	-0.00655687	-0.00309307	-0.0030824	0.03746	-0.00133206	-0.0116264	0.00196154	0.00725528				139.602	142.337	129.87	127.633	126.856	151.559	-0.0322554	-0.0117776	0.00295971	-0.00962531	0.00609364	0.179332	0.0224544	0.0318602
286	143.315	131.422	128.689	135.725	131.807	134.464	-0.00648754	-0.00678112	-0.00320633	0.0313505	-0.00107438	-0.0100878	0.000618902	0.00627649				142.912	142.305	129.788	127.509	126.924	146.434	-0.00930995	-0.0119997	0.00232644	-0.0105875	0.00663295	0.139452	0.0194191	0.024205
287	143.382	131.652	129.075	135.114	130.822	133.949	-0.00602307	-0.0050429	-0.000216468	0.0267077	-0.0085394	-0.0138791	-0.00116555	0.00586645				144.962	142.239	129.598	127.605	126.531	139.567	0.004901	-0.012458	0.00085911	-0.00984258	0.00351607	0.0860178	0.0121656	0.0150557
288	143.247	131.538	129.212	134.378	131.306	134.543	-0.00695894	-0.00590446	0.000844701	0.0211149	-0.00487131	-0.00950617	-0.000880208	0.00461625				145.669	142.204	129.386	127.439	126.792	143.192	0.00980204	-0.012701	-0.000778123	-0.0111307	0.00558606	0.114225	0.0175006	0.0196832
289	143.278	131.798	128.937	133.89	131.396	134.228	-0.00674404	-0.00393951	-0.00128538	0.0174067	-0.00418923	-0.0118252	-0.00176277	0.00410036				146.759	142.322	129.484	127.393	127.193	143.475	0.0173581	-0.0118817	-2.12892e-05	-0.0114876	0.00876639	0.116427	0.0198602	0.0198662
290	143.153	131.626	129.088	134.513	130.869	134.628	-0.00761059	-0.0052394	-0.000115773	0.0221408	-0.0081832	-0.00888041	-0.00131477	0.00486845				147.352	142.093	129.411	127.611	127.285	137.243	0.0214689	-0.0134716	-0.000585053	-0.00979602	0.00949604	0.0679339	0.0125077	0.0122546
291	143.095	131.59	129.382	134.823	130.783	134.499	-0.00801266	-0.00551147	0.00216148	0.0244964	-0.00883497	-0.00983009	-0.000921884	0.0053818				148.079	142.266	129.367	127.957	127.109	129.909	0.0265086	-0.0122705	-0.000924856	-0.00711121	0.00810018	0.0108656	0.00419463	0.00572363
292	142.958	131.652	129.178	134.061	131.183	135.043	-0.0089624	-0.0050429	0.000581345	0.0187061	-0.00580349	-0.00582521	-0.00105776	0.00415095				147.851	142.061	129.288	127.977	127.588	128.989	0.024928	-0.0136938	-0.00153496	-0.00695602	0.0118991	0.0037068	0.0030582	0.00565356
293	142.917	131.628	129.385	134.428	130.892	134.095	-0.00924662	-0.00522428	0.00218472	0.0214949	-0.00800889	-0.0128043	-0.00193409	0.00511613				147.133	142.107	129.351	127.725	127.347	123.125	0.0199507	-0.0133744	-0.00104842	-0.00891143	0.00998776	-0.041923	-0.00588646	0.0087689
294	142.809	131.373	129.293	134.213	131.546	134.893	-0.00999532	-0.00715144	0.00147211	0.0198611	-0.00305242	-0.0069295	-0.000965908	0.00446997				146.08	141.818	129.036	127.804	126.914	127.325	0.0126512	-0.0153809	-0.0034811	-0.00829843	0.00655364	-0.00924135	-0.00286616	0.00430763
295	142.811	131.559	129.155	134.51	131.657	134.273	-0.00998146	-0.00574575	0.000403192	0.022118	-0.00221119	-0.0114939	-0.00115185	0.00500349				143.42	141.864	129.098	127.597	127.044	132.423	-0.00578841	-0.0150615	-0.00300229	-0.00990465	0.00758467	0.0304279	0.000709282	0.00670283
296	142.876	131.479	129.194	134.151	131.862	134.727	-0.00953085	-0.00635035	0.000705277	0.01939	-0.000657553	-0.00815158	-0.000765842	0.0043627				141.592	141.732	129.17	128.063	127.226	131.569	-0.0184604	-0.015978	-0.00244625	-0.0062887	0.00902811	0.0237826	-0.0017271	0.00650855
297	142.728	131.652	129.19	132.901	132.38	134.343	-0.0105568	-0.0050429	0.000674294	0.00989147	0.00326821	-0.0109786	-0.00212405	0.0033631				143.157	141.846	129.415	127.894	126.45	125.442	-0.00761157	-0.0151865	-0.000554162	-0.00760007	0.00287366	-0.0238936	-0.00866204	0.00398167
298	142.703	131.573	129.219	131.795	139.256	134.982	-0.0107302	-0.00563994	0.000898921	0.00148717	0.0553793	-0.00627429	0.00585351	0.010084				145.112	141.699	129.558	127.861	127.003	125.532	0.00594082	-0.0162071	0.000550198	-0.00785613	0.0072595	-0.0231933	-0.00558433	0.00504482
299	142.755	132.212	129.595	131.04	137.967	134.377	-0.0103697	-0.000810716	0.00381133	-0.00424995	0.0456104	-0.0107282	0.00387719	0.00865252				146.095	141.68	129.579	127.676	126.746	125.272	0.0127551	-0.016339	0.000712377	-0.00929165	0.00522123	-0.0252164	-0.00535972	0.00579445
300	142.642	132.38	129.294	130.081	138.181	134.762	-0.011153	0.00045894	0.00147985	-0.0115372	0.0472322	-0.00789391	0.00309781	0.00912052				145.922	141.433	129.508	127.779	126.811	126.014	0.0115559	-0.0180539	0.000164058	-0.00849241	0.00573675	-0.0194427	-0.00475538	0.00518612
301	142.821	132.554	129.445	129.739	138.648	134.871	-0.00991213	0.00177394	0.00264946	-0.014136	0.0507715	-0.00709146	0.00400922	0.0097294				144.34	141.38	129.499	128.007	126.447	126.348	0.000589188	-0.0184219	9.45528e-05	-0.00672324	0.00284987	-0.0168437	-0.0064092	0.00378721
302	142.544	132.695	129.745	129.242	139.317	140.984	-0.0118324	0.00283955	0.00497319	-0.0179126	0.0558417	0.0379119	0.0119702	0.0118174				143.731	141.514	129.222	128.032	126.553	126.84	-0.0036325	-0.0174915	-0.00204466	-0.00652925	0.00369055	-0.0130153	-0.00650378	0.00313679
303	142.478	132.934	129.591	129.394	139.475	142.435	-0.0122899	0.00464578	0.00378034	-0.0167576	0.0570391	0.048594	0.0141686	0.0127516				142.772	141.494	129.593	127.937	126.908	126.17	-0.0102805	-0.0176304	0.000820496	-0.00726641	0.00650606	-0.0182288	-0.00767991	0.00404443
304	142.776	133.252	129.591	130.704	138.838	144.181	-0.0102241	0.00704906	0.00378034	-0.00680315	0.0522115	0.0614479	0.0179103	0.0126386				142.302	141.396	129.623	127.615	126.004	124.638	-0.0135386	-0.0183108	0.00105218	-0.00976498	-0.000663559	-0.0301498	-0.0118959	0.00474487
305	142.609	134.494	129.485	130.708	138.522	147.339	-0.0113818	0.0164354	0.00295929	-0.00677276	0.0498166	0.0846969	0.0226256	0.0153167				141.834	141.378	129.414	127.985	126.628	128.927	-0.0167828	-0.0184358	-0.000561885	-0.00689395	0.00428538	0.00322435	-0.00586078	0.0040499
306	142.516	134.566	129.806	130.756	139.17	148.244	-0.0120265	0.0169796	0.00544568	-0.00640801	0.0547276	0.0913594	0.025013	0.016423				141.182	141.488	129.267	127.787	126.572	132.988	-0.0213026	-0.017672	-0.00169714	-0.00843034	0.00384124	0.0348244	-0.00173942	0.00826517
307	142.57	134.781	129.934	130.436	138.648	151.287	-0.0116522	0.0186044	0.00643714	-0.00883964	0.0507715	0.113762	0.0281805	0.019456				140.81	141.276	129.062	127.65	125.776	138.587	-0.0238814	-0.0191439	-0.00328031	-0.0094934	-0.00247183	0.0783921	0.00335354	0.0154074
308	142.522	135.231	129.515	131.373	138.378	148.476	-0.0119849	0.0220053	0.00319166	-0.00171954	0.0487253	0.0930674	0.0255475	0.0160838				140.41	141.401	128.912	127.866	126.383	138.047	-0.0266542	-0.0182761	-0.00443873	-0.00781733	0.00234229	0.0741901	0.00322434	0.0148015
309	142.51	135.686	131.645	132.25	139.014	144.339	-0.0120681	0.025444	0.0196901	0.00494463	0.0535453	0.0626111	0.0256945	0.0115919				139.859	141.157	128.819	128.026	126.44	127.847	-0.0304739	-0.0199701	-0.00515695	-0.00657581	0.00279435	-0.00517949	-0.0107603	0.00495724
310	142.583	136.19	132.907	133.771	139.009	144.267	-0.011562	0.0292529	0.0294653	0.0165024	0.0535074	0.0620811	0.0298745	0.0107891				140.139	141.172	128.911	127.982	125.816	121.473	-0.0285329	-0.019866	-0.00444645	-0.00691723	-0.00215459	-0.0547777	-0.0194491	0.00818948
311	142.743	136.374	132.93	136.197	138.988	146.813	-0.0104529	0.0306435	0.0296434	0.0349372	0.0533483	0.0808245	0.0364907	0.0122975				139.836	141.166	128.767	127.862	126.252	119.328	-0.0306333	-0.0199076	-0.00555853	-0.00784837	0.00130333	-0.0714687	-0.0223522	0.0108612
312	142.489	136.963	133.114	135.747	139.933	149.752	-0.0122137	0.0350949	0.0310686	0.0315177	0.0605101	0.102461	0.0414065	0.0155051				139.634	141.462	128.981	127.593	126.292	119.581	-0.0320336	-0.0178526	-0.00390586	-0.00993569	0.00162057	-0.0695	-0.0219345	0.0106536
313	142.493	137.136	131.719	131.738	139.934	152.062	-0.0121859	0.0364023	0.0202633	0.00105403	0.0605177	0.119467	0.0375864	0.0194454				140.964	141.335	129.186	127.455	125.896	120.925	-0.0228138	-0.0187343	-0.00232268	-0.0110065	-0.00152011	-0.0590419	-0.0192399	0.00868946
314	142.544	137.402	131.745	132.497	138.935	153.273	-0.0118324	0.0384126	0.0204647	0.00682154	0.0529466	0.128382	0.0391992	0.0201219				144.229	141.364	129.34	127.797	126.129	125.652	-0.000180283	-0.018533	-0.00113337	-0.00835274	0.000327814	-0.0222595	-0.00835518	0.00404679
315	142.479	137.909	132.298	132.095	140.553	156.401	-0.012283	0.0422442	0.0247481	0.00376681	0.0652089	0.151411	0.0458493	0.0238932				141.96	141.32	129.164	127.537	126.459	136.278	-0.0159094	-0.0188384	-0.00249258	-0.0103702	0.00294504	0.060425	0.00262656	0.012028
316	142.492	138.286	132.475	132.767	140.085	155.277	-0.0121929	0.0450934	0.0261191	0.00887322	0.0616621	0.143136	0.0454484	0.0222409				140.132	141.29	129.062	127.401	125.881	140.129	-0.0285814	-0.0190467	-0.00328031	-0.0114255	-0.00163907	0.0903909	0.00440298	0.0176804
317	142.533	138.486	132.629	134.187	140.534	147.861	-0.0119087	0.0466049	0.027312	0.0196636	0.0650649	0.0885398	0.0392127	0.0144837				138.701	141.02	128.986	127.633	125.882	138.546	-0.0385013	-0.0209213	-0.00386724	-0.00962531	-0.00163114	0.078073	0.00058779	0.0164556
318	142.525	138.401	132.687	135.379	141.564	135.118	-0.0119641	0.0459625	0.0277612	0.0287214	0.072871	-0.00527307	0.0263465	0.0129415				138.039	141.032	129.087	127.545	126.501	146.718	-0.0430904	-0.020838	-0.00308724	-0.0103081	0.00327814	0.141662	0.0112694	0.0269095
319	142.687	138.332	132.606	138.583	140.923	141.063	-0.0108411	0.045441	0.0271338	0.053068	0.068013	0.0384935	0.0368847	0.0110747				136.787	140.91	129.16	127.631	126.516	150.206	-0.0517695	-0.021685	-0.00252348	-0.00964083	0.00339711	0.168803	0.0144303	0.0318885
320	142.36	138.368	132.404	139.157	141.296	146.843	-0.013108	0.0457131	0.0255692	0.0574297	0.0708399	0.0810454	0.0445815	0.0139941				136.474	141.037	129.116	127.596	126.139	148.403	-0.0539392	-0.0208033	-0.00286328	-0.00991241	0.000407124	0.154774	0.0112771	0.0297997
321	142.447	138.778	133.857	136.61	142.512	147.065	-0.0125048	0.0488117	0.0368237	0.0380755	0.0800556	0.0826797	0.0456569	0.0142387				136.136	141.168	129.157	127.812	126.555	148.155	-0.0562823	-0.0198937	-0.00254664	-0.00823635	0.00370642	0.152844	0.0115985	0.0295554
322	142.456	138.875	135.773	137	141.306	141.178	-0.0124424	0.0495448	0.0516646	0.0410391	0.0709157	0.0393401	0.0400103	0.0114523				135.89	141.005	129.057	127.446	126.576	148.496	-0.0579876	-0.0210254	-0.00331892	-0.0110763	0.00387297	0.155497	0.0109937	0.0302256
323	142.342	138.498	136.56	137.436	142.749	142.665	-0.0132327	0.0466956	0.0577605	0.0443521	0.0818517	0.0502873	0.0446191	0.0128353				138.391	141.127	128.994	127.478	126.29	153.178	-0.0406503	-0.0201784	-0.00380546	-0.010828	0.0016047	0.19193	0.0196787	0.0349797
324	142.336	138.857	135.97	136.725	143.241	142.984	-0.0132743	0.0494087	0.0531905	0.0389494	0.0855805	0.0526357	0.0444151	0.0131935				140.671	140.931	128.922	127.69	126.751	140.311	-0.0248449	-0.0215392	-0.0043615	-0.00918301	0.00526089	0.0918071	0.00618989	0.0177115
325	142.333	138.93	135.826	136.61	141.78	140.883	-0.0132951	0.0499604	0.0520751	0.0380755	0.074508	0.0371684	0.0397487	0.0119548				142.892	140.848	129.074	127.552	126.815	132.082	-0.00944859	-0.0221155	-0.00318764	-0.0102538	0.00576847	0.0277745	-0.00191043	0.00701539
326	142.224	138.882	135.638	136.726	143.593	141.202	-0.0140508	0.0495977	0.0506189	0.038957	0.0882482	0.0395168	0.042148	0.013451				145.313	141.071	129.219	127.307	126.733	127.825	0.00733419	-0.0205672	-0.00206783	-0.0121549	0.00511813	-0.00535068	-0.00461472	0.00430453
327	142.346	139.229	137.283	139.727	142.467	143.553	-0.013205	0.0522201	0.0633607	0.061761	0.0797146	0.0568247	0.0501127	0.0132238				147.692	141.27	129.221	127.239	126.617	129.57	0.0238258	-0.0191856	-0.00205238	-0.0126826	0.00419814	0.00822775	0.000388529	0.00628551
328	142.056	139.008	138.339	141.136	143.179	145.845	-0.0152154	0.0505499	0.0715402	0.0724678	0.0851106	0.0736982	0.0563585	0.0150265				147.965	141.141	129.593	127.324	126.932	137.509	0.0257183	-0.0200812	0.000820496	-0.012023	0.0066964	0.0700038	0.0118558	0.0133065
329	142.428	139.129	138.416	141.449	144.371	144.774	-0.0126366	0.0514644	0.0721366	0.0748462	0.0941444	0.0658136	0.0576281	0.0151465				147.949	141.21	129.716	127.676	126.521	158.59	0.0256074	-0.0196021	0.0017704	-0.00929165	0.00343676	0.234042	0.0393271	0.0394281
330	142.262	139.179	138.118	140.845	142.643	145.339	-0.0137873	0.0518422	0.0698284	0.0702565	0.0810484	0.069973	0.0548602	0.0142559				146.638	141.052	129.81	127.405	125.995	166.969	0.0165193	-0.0206991	0.00249634	-0.0113945	-0.000734938	0.299242	0.0475715	0.0505982
331	142.469	138.787	137.822	140.359	144.13	153.312	-0.0123523	0.0488797	0.0675357	0.0665635	0.0923179	0.12867	0.065269	0.0191935				148.585	141.133	130.123	127.262	126.269	164.436	0.0300162	-0.0201367	0.00491358	-0.0125041	0.00143815	0.279532	0.0472098	0.0469945
332	142.25	139.142	137.348	142.286	145.17	156.632	-0.0138705	0.0515626	0.0638642	0.0812064	0.1002	0.153111	0.0726789	0.0225934				151.588	141.143	129.858	127.443	126.2	157.983	0.0508335	-0.0200673	0.00286704	-0.0110996	0.000890915	0.229319	0.0421239	0.0387555
333	142.592	139.769	137.275	143.064	143.827	162.227	-0.0114996	0.0563011	0.0632987	0.0871183	0.0900216	0.194301	0.0799235	0.0273426				152.789	141.198	129.918	128.029	125.883	154.362	0.0591591	-0.0196855	0.0033304	-0.00655253	-0.00162321	0.201143	0.0392952	0.0342236
334	142.515	140.412	136.935	144.62	145.219	161.962	-0.0120334	0.0611606	0.0606652	0.0989421	0.100571	0.19235	0.0836093	0.0274015				153.945	141.087	129.998	127.847	125.873	147.766	0.0671727	-0.0204561	0.00394823	-0.00796476	-0.00170252	0.149817	0.0318024	0.0267016
335	142.662	143.427	137.124	142.037	145.813	163.443	-0.0110144	0.0839464	0.0621291	0.0793143	0.105073	0.203253	0.0871169	0.0283638				155.844	141.06	129.974	128.003	126.144	142.194	0.0803369	-0.0206436	0.00376288	-0.00675427	0.000446779	0.106459	0.027268	0.0214573
336	142.232	145.789	137.093	141.208	144.617	162.259	-0.0139953	0.101797	0.061889	0.0730149	0.0960088	0.194537	0.0855419	0.027615				155.142	140.954	129.836	128.292	126.192	136.816	0.0754705	-0.0213795	0.00269714	-0.00451176	0.000827467	0.0646113	0.0196192	0.0163772
337	142.456	147.255	136.923	141.93	146.244	162.621	-0.0124424	0.112876	0.0605722	0.0785013	0.108339	0.197202	0.0908414	0.02819				155.62	140.939	129.966	128.016	125.76	133.549	0.078784	-0.0214837	0.0037011	-0.0066534	-0.00259872	0.0391897	0.0151565	0.0151555
338	142.45	148.791	136.966	142.441	143.955	159.58	-0.012484	0.124485	0.0609053	0.0823843	0.0909917	0.174814	0.0868493	0.025646				154.833	141.096	130.023	128.089	126.204	132.338	0.0733284	-0.0203936	0.0041413	-0.00608695	0.000922638	0.0297665	0.013613	0.0136896
339	142.488	151.02	137.51	143.961	145.985	159.57	-0.0122206	0.14133	0.065119	0.0939345	0.106376	0.17474	0.09488	0.026473				155.644	141.161	129.244	128.402	126.155	133.69	0.0789504	-0.0199423	-0.00187476	-0.00365821	0.00053402	0.0402869	0.015716	0.0150434
340	142.285	151.847	137.543	143.489	147.626	162.953	-0.0136279	0.14758	0.0653746	0.0903478	0.118813	0.199646	0.101356	0.0298549				155.033	141.167	129.66	127.949	125.907	133.52	0.0747149	-0.0199007	0.00133792	-0.00717329	-0.00143287	0.038964	0.0144183	0.0144966
341	142.339	152.524	137.819	143.863	149.471	159.033	-0.0132535	0.152697	0.0675124	0.0931898	0.132796	0.170787	0.100621	0.0275616				156.241	141.057	130.694	128.142	126.189	134.338	0.0830889	-0.0206644	0.0093233	-0.0056757	0.000803674	0.0453292	0.0187008	0.015713
342	142.181	152.186	137.761	145.546	148.861	160.53	-0.0143488	0.150142	0.0670632	0.105979	0.128173	0.181808	0.103136	0.0283653				156.56	141.054	131.414	128.372	127.196	137.092	0.0853003	-0.0206852	0.0148837	-0.003891	0.00879018	0.066759	0.0251928	0.0169967
343	142.413	153.972	137.64	146.742	150.027	147.599	-0.0127405	0.16364	0.0661259	0.115067	0.13701	0.086611	0.0926188	0.0254015				156.734	141.07	131.591	128.266	127.059	136.009	0.0865065	-0.0205741	0.0162506	-0.00471351	0.00770363	0.0583318	0.0239175	0.0165556
344	142.248	154.643	138.052	147.975	153.695	145.041	-0.0138844	0.168711	0.0693172	0.124436	0.164808	0.0677792	0.0968612	0.028524				156.966	141.196	132.131	128.626	126.748	135.86	0.0881147	-0.0196993	0.020421	-0.00192007	0.0052371	0.0571724	0.0248876	0.0164851
345	142.36	153.276	138.072	149.517	152.287	146.207	-0.013108	0.15838	0.0694721	0.136154	0.154137	0.0763632	0.0968997	0.0270016				156.878	141.186	132.48	128.55	127.37	135.117	0.0875047	-0.0197688	0.0231162	-0.0025098	0.0101702	0.0513908	0.0249839	0.0159037
346	142.465	155.39	139.172	151.376	150.972	147.169	-0.0123801	0.174357	0.0779924	0.15028	0.144171	0.0834453	0.102978	0.0278942				157.518	140.998	132.991	128.561	127.597	135.219	0.0919413	-0.021074	0.0270626	-0.00242445	0.0119705	0.0521845	0.0266101	0.0165867
347	143.006	152.568	139.681	152.559	154.338	145.354	-0.00862964	0.153029	0.081935	0.159269	0.169681	0.0700835	0.104228	0.0283401				157.017	141.236	133.731	128.699	127.474	135.697	0.0884683	-0.0194216	0.0327774	-0.00135363	0.010995	0.055904	0.0278949	0.0161838
348	143.344	154.145	139.519	153.762	150.958	145.885	-0.0062865	0.164947	0.0806802	0.168411	0.144065	0.0739926	0.104302	0.0277341				157.642	141.046	134.02	128.845	127.205	135.82	0.0928009	-0.0207408	0.0350093	-0.000220733	0.00886156	0.0568611	0.0287619	0.0169471
349	143.556	150.088	139.325	155.512	152.726	144.422	-0.00481684	0.134287	0.0791775	0.181709	0.157464	0.0632222	0.10184	0.0282291				157.561	141.169	134.212	129.519	127.808	136.626	0.0922394	-0.0198868	0.0364921	0.0050092	0.0136439	0.0631329	0.0317718	0.0167089
350	143.297	152.713	138.845	155.377	152.789	145.213	-0.00661232	0.154125	0.0754596	0.180683	0.157942	0.0690454	0.105107	0.0291928				155.84	141.158	134.364	129.301	127.935	136.325	0.0803091	-0.0199632	0.037666	0.00331762	0.0146512	0.0607907	0.0294619	0.0152534
351	143.012	149.595	138.406	155.399	150.425	146.032	-0.00858805	0.130561	0.0720592	0.18085	0.140026	0.0750748	0.0983304	0.0272331				156.764	141.199	134.38	129.054	128.224	135.013	0.0867144	-0.0196785	0.0377895	0.00140101	0.0169432	0.0505816	0.0289585	0.0154387
352	143.227	149.411	138.083	155.595	152.313	144.035	-0.00709759	0.12917	0.0695573	0.182339	0.154334	0.0603731	0.0981128	0.028594				155.54	141.164	134.454	129.267	131.19	137.744	0.0782295	-0.0199215	0.038361	0.0030538	0.0404666	0.0718324	0.035337	0.0156022
353	142.969	149.319	138.123	156.119	148.989	145.697	-0.00888614	0.128475	0.0698671	0.186321	0.129143	0.0726086	0.0962547	0.0274115				156.12	141.18	133.817	129.197	131.396	139.375	0.0822501	-0.0198104	0.0334416	0.00251063	0.0421003	0.0845238	0.0375027	0.0170882
354	142.873	151.719	138.775	155.326	151.38	146.362	-0.00955165	0.146613	0.0749174	0.180295	0.147263	0.0775043	0.10284	0.0282502				156.215	141.288	133.105	129.049	130.634	150.726	0.0829087	-0.0190606	0.027943	0.00136221	0.0360569	0.17285	0.0503433	0.0282785
355	142.889	154.217	138.714	156.371	151.933	146.012	-0.00944073	0.165492	0.0744449	0.188236	0.151455	0.0749276	0.107519	0.0303546				156.392	141.824	132.811	129.521	130.808	166.506	0.0841357	-0.0153392	0.0256725	0.00502472	0.0374369	0.295639	0.072095	0.0467676
356	143.065	155.745	139.182	156.744	149.133	146.725	-0.00822063	0.177039	0.0780699	0.19107	0.130234	0.0801767	0.108062	0.0301875				156.112	142.45	132.227	129.35	131.669	151.515	0.0821947	-0.010993	0.0211623	0.00369784	0.0442655	0.178989	0.0532194	0.0284845
357	143.305	153.909	140.596	156.007	152.858	147.435	-0.00655687	0.163164	0.0890224	0.18547	0.158465	0.0854036	0.112495	0.0291343				157.109	143.834	132.466	128.992	131.354	146.629	0.089106	-0.00138415	0.0230081	0.000919921	0.0417672	0.14097	0.0490645	0.0228364
358	143.328	152.399	140.927	155.803	151.15	146.578	-0.00639742	0.151752	0.0915862	0.18392	0.14552	0.0790945	0.107579	0.0278547				156.566	144.989	132.47	129.395	132.112	141.413	0.0853419	0.00663483	0.023039	0.00404702	0.0477789	0.100382	0.0445373	0.0166657
359	143.743	151.538	141.033	155.392	152.457	143.321	-0.00352049	0.145245	0.0924073	0.180797	0.155426	0.0551167	0.104245	0.0284767				157.105	145.998	132.331	128.906	131.557	138.617	0.0890783	0.0136401	0.0219655	0.000252599	0.0433772	0.0786255	0.0411566	0.0147241
360	143.897	152.359	141.17	156.354	152.345	140.331	-0.0024529	0.15145	0.0934685	0.188107	0.154577	0.0331046	0.103042	0.0307394				157.664	146.958	131.995	129.072	132.164	135.929	0.0929534	0.0203053	0.0193707	0.00154068	0.0481913	0.0577093	0.0400118	0.0135122
361	144.046	150.376	141.204	155.604	150.727	139.574	-0.00141998	0.136463	0.0937318	0.182408	0.142315	0.0275316	0.0968382	0.0291136				157.772	147.736	131.891	128.124	131.631	141.82	0.0937021	0.0257068	0.0185675	-0.00581537	0.0439641	0.103549	0.0466124	0.0177374
362	144.477	151.461	141.116	156.221	152.871	143.382	0.00156787	0.144663	0.0930502	0.187096	0.158563	0.0555658	0.106751	0.0285472				156.754	148.13	132.078	128.834	132.255	138.823	0.0866451	0.0284423	0.0200116	-0.000306088	0.0489131	0.0802285	0.0439891	0.0140662
363	144.871	152.49	141.762	156.598	153.66	149.216	0.00429922	0.15244	0.0980539	0.189961	0.164543	0.0985152	0.117969	0.027225				155.935	148.08	132.033	129.219	132.446	140.474	0.0809677	0.0280951	0.0196641	0.00268134	0.0504279	0.0930754	0.0458186	0.0145475
364	145.271	151.805	142.116	156.421	151.339	150.747	0.00707217	0.147263	0.100796	0.188616	0.146953	0.109786	0.116748	0.0253904				155.765	148.4	132.382	129.81	131.521	139.839	0.0797892	0.0303168	0.0223594	0.00726723	0.0430917	0.0881343	0.0451598	0.0131989
365	145.502	150.746	142.526	155.738	153.75	151.246	0.00867355	0.13926	0.103972	0.183426	0.165225	0.11346	0.119003	0.0252497				155.867	148.615	132.704	130.005	132.12	141.626	0.0804963	0.0318096	0.0248461	0.00878035	0.0478424	0.10204	0.0493024	0.0144943
366	145.486	150.983	142.474	156.009	152.702	149.354	0.00856263	0.141051	0.103569	0.185485	0.157283	0.0995311	0.115914	0.0252511				156.172	148.261	132.694	130.074	132.194	145.38	0.0826106	0.0293518	0.0247689	0.00931575	0.0484293	0.131251	0.0542878	0.0185072
367	145.88	148.015	142.878	155.979	152.7	149.34	0.011294	0.11862	0.106698	0.185257	0.157267	0.0994281	0.113094	0.0243449				156.149	148.405	132.567	129.884	131.431	146.192	0.0824512	0.0303516	0.0237881	0.00784144	0.0423779	0.137569	0.0540632	0.0196052
368	146.291	150.818	142.889	156.432	153.014	149.383	0.0141432	0.139804	0.106783	0.188699	0.159647	0.0997446	0.118137	0.0248015				156.979	147.883	132.727	129.781	132.292	145.641	0.0882049	0.0267274	0.0250237	0.00704221	0.0492065	0.133282	0.0549144	0.0193752
369	146.508	150.804	141.367	156.098	150.849	149.44	0.0156475	0.139698	0.0949944	0.186161	0.143239	0.100164	0.113317	0.0237667				156.95	147.091	133.033	129.542	132.215	143.711	0.0880038	0.0212287	0.0273869	0.00518767	0.0485958	0.118264	0.0514444	0.0177397
370	146.456	151.045	139.473	156.2	157.55	147.292	0.015287	0.141519	0.0803239	0.186936	0.194024	0.0843509	0.117074	0.0283911				155.624	146.962	133.032	129.579	132.249	143.021	0.0788118	0.020333	0.0273792	0.00547478	0.0488655	0.112895	0.0489598	0.0164873
371	146.337	151.295	138.973	156.424	160.036	149.123	0.0144621	0.143409	0.076451	0.188639	0.212865	0.0978305	0.122276	0.0302094				156.059	146.694	133.055	129.856	133.211	141.826	0.0818273	0.0184724	0.0275568	0.00762417	0.0564951	0.103596	0.0492619	0.0155111
372	146.339	148.496	139.365	156.432	161.861	148.797	0.0144759	0.122255	0.0794874	0.188699	0.226696	0.0954305	0.121174	0.0313479				156.065	146.64	133.108	129.804	132.947	140.158	0.0818689	0.0180975	0.0279661	0.00722068	0.0544013	0.0906165	0.0466952	0.014086
373	146.21	146.52	139.082	156.192	161.01	143.997	0.0135817	0.107322	0.0772953	0.186876	0.220246	0.0600934	0.110902	0.0321057				155.748	146.308	132.909	129.514	133.534	141.192	0.0796714	0.0157924	0.0264293	0.00497041	0.0590568	0.0986624	0.0474305	0.0153234
374	145.924	145.545	138.343	156.445	160.851	142.883	0.011599	0.0999531	0.0715712	0.188798	0.219041	0.0518922	0.107143	0.0330087				156.416	145.905	132.796	129.597	133.46	139.21	0.0843021	0.0129945	0.0255566	0.00561445	0.0584699	0.0832398	0.0450296	0.0143085
375	146.026	145.932	137.651	156.957	159.872	145.728	0.0123061	0.102878	0.0662111	0.192689	0.211622	0.0728368	0.109757	0.031653				156.597	145.905	132.32	129.572	132.689	140.794	0.0855568	0.0129945	0.0218806	0.00542046	0.0523551	0.0955655	0.0456288	0.0156832
376	147.311	146.94	136.899	156.151	155.686	145.988	0.0212142	0.110496	0.0603863	0.186564	0.179897	0.0747509	0.105551	0.0272128				157.479	145.597	133.046	129.556	133.625	140.991	0.0916709	0.0108561	0.0274873	0.00529631	0.0597785	0.0970984	0.0486979	0.016409
377	148.834	146.189	136.387	156.041	148.79	149.688	0.0317722	0.10482	0.0564205	0.185728	0.127635	0.10199	0.101394	0.022123				157.234	145.538	133.89	129.429	133.249	137.434	0.0899726	0.0104464	0.0340054	0.00431084	0.0567965	0.0694202	0.0441586	0.0138133
378	149.977	146.141	136.446	156.123	139.311	150.036	0.0396959	0.104457	0.0568775	0.186351	0.0557962	0.104552	0.0912884	0.0219787				157.61	145.284	134.507	129.462	134.045	139.995	0.0925791	0.00868297	0.0387703	0.00456691	0.0631095	0.0893482	0.0495095	0.0157364
379	150.706	146.891	136.413	156.21	137.333	154.921	0.0447496	0.110126	0.0566219	0.187012	0.0408055	0.140515	0.0966383	0.02428				156.828	145.346	134.583	129.457	134.083	138.298	0.0871581	0.00911342	0.0393573	0.00452811	0.0634109	0.0761433	0.0466185	0.0141752
380	150.876	147.438	135.946	156.075	138.587	153.406	0.0459281	0.114259	0.0530046	0.185987	0.0503092	0.129362	0.0964749	0.023084				156.898	145.195	134.132	129.323	134.1	141.142	0.0876434	0.00806505	0.0358743	0.00348833	0.0635457	0.0982734	0.0494817	0.0163815
381	151.028	151.302	135.729	155.982	137.623	152.425	0.0469818	0.143462	0.0513238	0.18528	0.0430033	0.12214	0.0986983	0.0245428				157.464	145.182	134.056	129.338	134.42	138.881	0.091567	0.0079748	0.0352873	0.00360472	0.0660837	0.0806798	0.0475329	0.0153039
382	150.56	153.662	137.05	156.009	138.523	151.433	0.0437375	0.161297	0.0615559	0.185485	0.0498242	0.114837	0.102789	0.0247652				156.998	145.27	133.74	129.543	133.914	139.13	0.0883366	0.00858577	0.0328469	0.00519543	0.0620706	0.0826173	0.0466088	0.0148628
383	150.597	153.073	139.394	155.887	138.248	146.606	0.043994	0.156846	0.079712	0.184558	0.04774	0.0793006	0.0986917	0.0238601				156.743	145.269	133.846	130.06	134.828	139.799	0.0865689	0.00857882	0.0336656	0.00920712	0.0693195	0.087823	0.0491938	0.0150375
384	150.449	155.665	141.15	155.797	138.598	149.923	0.042968	0.176435	0.0933135	0.183874	0.0503926	0.10372	0.108451	0.0246447				157.199	145.304	133.893	130.329	133.558	137.393	0.0897299	0.00882182	0.0340285	0.0112944	0.0592471	0.0691011	0.0453705	0.013353
385	150.495	156.339	141.051	155.735	138.225	143.255	0.0432869	0.181529	0.0925467	0.183403	0.0475657	0.0546308	0.100494	0.0268832				157.464	145.083	135.083	130.529	134.31	140.206	0.091567	0.00728746	0.0432187	0.0128463	0.0652112	0.09099	0.0518535	0.0151322
386	150.156	157.501	139.758	155.941	136.919	141.372	0.0409368	0.19031	0.0825314	0.184968	0.0376679	0.0407683	0.0961972	0.0297075				158.479	145.276	135.393	130.7	134.046	139.544	0.0986031	0.00862742	0.0456127	0.0141732	0.0631175	0.0858388	0.0526621	0.0150452
387	149.731	160.342	139.525	156.007	136.405	144.637	0.0379905	0.211781	0.0807267	0.18547	0.0337725	0.064805	0.102424	0.0314146				158.045	144.976	135.671	130.513	133.553	137.192	0.0955946	0.00654457	0.0477597	0.0127222	0.0592075	0.0675371	0.0482276	0.0138268
388	149.432	161.663	139.233	155.531	138.259	150.327	0.0359178	0.221765	0.0784649	0.181853	0.0478234	0.106694	0.112086	0.0305437				158.375	144.917	135.215	130.486	134.619	137.216	0.0978822	0.00613494	0.0442381	0.0125127	0.0676619	0.0677238	0.0493589	0.0144672
389	149.098	162.306	138.456	155.251	142.014	153.419	0.0336023	0.226624	0.0724465	0.179725	0.0762814	0.129457	0.119689	0.0298115				158.345	144.871	134.898	130.652	134.779	134.274	0.0976742	0.00581557	0.0417899	0.0138008	0.0689309	0.0448312	0.0454738	0.0139822
390	148.805	162.791	137.827	155.029	143.904	152.383	0.0315712	0.230289	0.0675744	0.178038	0.0906051	0.12183	0.119985	0.0299821				158.756	144.762	136.021	130.708	133.57	137.199	0.100523	0.0050588	0.0504626	0.0142353	0.0593423	0.0675916	0.0495357	0.0144304
391	148.761	163.433	136.767	155.001	143.839	151.472	0.0312661	0.235141	0.0593639	0.177826	0.0901125	0.115124	0.118139	0.031117				158.116	144.816	137.528	130.544	135.714	136.509	0.0960867	0.00543372	0.0621009	0.0129627	0.0763464	0.0622224	0.0525255	0.0146442
392	148.462	163.865	136.522	154.377	143.117	150.08	0.0291934	0.238406	0.0574662	0.173084	0.0846407	0.104876	0.114611	0.03178				158.292	144.484	137.917	130.896	134.301	140.492	0.0973068	0.0031287	0.0651051	0.0156941	0.0651399	0.0932155	0.0565983	0.0159953
393	148.466	165.116	137.087	154.762	145.209	153.915	0.0292211	0.247861	0.0618425	0.176009	0.100495	0.133109	0.124756	0.0324166				158.452	144.324	137.536	131.072	135.272	141.922	0.0984159	0.00201784	0.0621627	0.0170598	0.0728409	0.104343	0.0594733	0.0171423
394	148.514	163.491	139.673	154.333	144.541	153.032	0.0295538	0.23558	0.0818731	0.172749	0.0954328	0.126608	0.123633	0.029633				158.448	144.359	137.689	130.856	135.265	140.444	0.0983882	0.00226084	0.0633443	0.0153837	0.0727853	0.092842	0.0575007	0.0163441
395	148.21	164.566	139.286	154.913	143.241	161.752	0.0274464	0.243704	0.0788755	0.177157	0.0855805	0.190804	0.133928	0.0335961				158.468	144.353	137.942	131.162	134.78	137.557	0.0985269	0.00221918	0.0652981	0.0177581	0.0689388	0.0703773	0.0538531	0.0148282
396	148.067	165.292	138.295	154.821	145.53	164.133	0.0264551	0.249191	0.0711994	0.176458	0.102928	0.208333	0.139094	0.0350792				158.019	144.358	138.171	131.483	135.395	135.099	0.0954143	0.0022539	0.0670667	0.020249	0.0738164	0.0512508	0.0516752	0.014225
397	147.952	164.915	137.555	155.544	144.761	170.131	0.0256579	0.246341	0.0654675	0.181952	0.0971001	0.25249	0.144835	0.0391798				158.008	144.301	138.183	131.56	134.155	136.427	0.0953381	0.00185816	0.0671593	0.0208464	0.0639819	0.0615844	0.0517947	0.0139379
398	147.647	165.458	136.388	155.359	144.366	163.106	0.0235435	0.250445	0.0564282	0.180546	0.0941065	0.200772	0.134307	0.0365119				157.626	144.247	137.765	131.83	135.297	141.69	0.09269	0.00148324	0.0639312	0.0229415	0.0730391	0.102538	0.0594371	0.0161856
399	147.581	163.923	136.443	155.584	145.839	160.794	0.0230859	0.238844	0.0568543	0.182256	0.10527	0.183751	0.131677	0.0340796				157.428	144.11	137.537	132.402	133.964	150.568	0.0913174	0.000532076	0.0621704	0.02738	0.0624671	0.17162	0.0692479	0.0241785
400	147.416	164.245	135.992	154.745	144.518	158.886	0.0219421	0.241278	0.0533609	0.17588	0.0952585	0.169705	0.126237	0.0340276				156.742	144.312	137.81	132.62	135.245	140.926	0.0865619	0.00193453	0.0642787	0.0290716	0.0726267	0.0965926	0.058511	0.0147616
401	147.148	166.229	135.515	155.229	146.307	150.333	0.0200842	0.256272	0.0496662	0.179558	0.108817	0.106738	0.120189	0.0352836				157.427	144.172	138.111	132.686	134.002	134.202	0.0913105	0.000962532	0.0666033	0.0295837	0.0627685	0.0442709	0.0492499	0.012905
402	146.835	163.661	136.779	154.557	144.095	145.107	0.0179144	0.236864	0.0594568	0.174452	0.0920527	0.0682651	0.108168	0.03333				157.174	144.042	137.323	132.255	135.414	138.115	0.0895566	5.9963e-05	0.0605177	0.0262393	0.0739671	0.0747193	0.0541767	0.0139221
403	146.683	163.824	138.372	155.148	145.168	140.259	0.0168607	0.238096	0.0717958	0.178943	0.100185	0.0325745	0.106409	0.0352656				155.624	144.05	135.459	132.357	134.655	142.68	0.0788118	0.000115506	0.0461224	0.0270308	0.0679474	0.110241	0.0550448	0.0159787
404	146.59	162.499	139.308	154.307	145.111	137.617	0.016216	0.228083	0.0790459	0.172552	0.0997526	0.0131244	0.101462	0.0349583				154.917	143.993	135.294	132.348	135.041	146.95	0.0739107	-0.000280236	0.0448482	0.026961	0.0710088	0.143467	0.059986	0.020196
405	146.392	162.679	139.643	154.186	144.47	144.176	0.0148434	0.229443	0.0816407	0.171632	0.0948947	0.0614111	0.108978	0.0318889				155.175	143.654	134.693	132.547	134.885	151.614	0.0756992	-0.00263386	0.0402068	0.0285051	0.0697716	0.17976	0.0652181	0.0257084
406	146.244	162.126	139.882	153.699	146.972	145.157	0.0138174	0.225264	0.0834919	0.167932	0.113857	0.0686332	0.112166	0.0307102				155.773	143.753	134.644	132.455	135.194	151.429	0.0798447	-0.00194652	0.0398283	0.0277912	0.0722222	0.17832	0.06601	0.0255654
407	146.13	162.393	139.881	153.674	145.776	141.634	0.0130271	0.227282	0.0834842	0.167742	0.104792	0.0426972	0.106504	0.0324958				154.9	143.505	135.207	131.8	135.29	145.927	0.0737929	-0.00366834	0.0441763	0.0227087	0.0729836	0.135507	0.0575834	0.0197651
408	146.111	162.388	139.519	153.797	145.624	137.607	0.0128954	0.227244	0.0806802	0.168677	0.103641	0.0130507	0.101031	0.0348497				154.598	143.547	134.686	132.232	135.382	151.495	0.0716994	-0.00337674	0.0401527	0.0260609	0.0737133	0.178834	0.0645138	0.0257465
409	145.783	162.23	139.29	153.673	146.431	143.815	0.0106215	0.22605	0.0789064	0.167734	0.109757	0.0587535	0.108637	0.0317589				153.81	143.389	134.473	132.692	135.246	147.244	0.0662368	-0.00447371	0.0385077	0.0296303	0.0726346	0.145755	0.0580485	0.0208732
410	145.654	163.004	138.699	153.753	144.752	145.881	0.00972727	0.231899	0.0743287	0.168342	0.0970319	0.0739632	0.109215	0.0321732				152.997	143.496	133.918	132.777	135.822	151.992	0.060601	-0.00373083	0.0342216	0.0302898	0.0772029	0.182701	0.0635476	0.0263851
411	145.583	161.675	138.205	153.706	147.031	147.19	0.00923507	0.221855	0.0705023	0.167985	0.114304	0.0835999	0.111247	0.0307103				152.894	143.72	133.538	132.429	135.007	147.579	0.059887	-0.00217563	0.0312869	0.0275895	0.0707391	0.148362	0.0559481	0.0212645
412	145.403	162.188	138.148	153.667	145.822	147.378	0.00798724	0.225732	0.0700608	0.167689	0.105141	0.084984	0.110266	0.0312904				153.975	143.909	133.436	132.575	136.213	144.527	0.0673806	-0.000863434	0.0304992	0.0287224	0.0803039	0.124613	0.0551093	0.0183039
413	145.424	161.277	138.413	153.448	146.556	148.571	0.00813282	0.218847	0.0721134	0.166025	0.110704	0.0937667	0.111598	0.0300264				153.309	144.016	133.473	133.11	134.497	144.735	0.0627638	-0.000120551	0.030785	0.0328737	0.0666943	0.126232	0.0532047	0.0176691
414	145.45	162.462	136.062	153.734	149.34	147.133	0.00831307	0.227803	0.0539031	0.168198	0.131803	0.0831803	0.1122	0.0326176				152.884	144.049	133.282	133.138	135.753	143.217	0.0598176	0.000108563	0.0293099	0.033091	0.0766557	0.11442	0.0522337	0.0164621
415	145.327	162.509	136.637	153.126	147.648	145.148	0.00746038	0.228158	0.0583569	0.163578	0.11898	0.0685669	0.107517	0.0325441				149.266	144.12	132.7	132.966	135.351	147.142	0.034737	0.000601504	0.0248152	0.0317564	0.0734674	0.144961	0.0517232	0.0209689
416	145.171	164.366	138.098	153.405	147.305	145.842	0.00637893	0.242192	0.0696735	0.165698	0.11638	0.0736761	0.112333	0.0337975				150.868	144.177	134.652	133.054	134.959	144.025	0.0458424	0.000997246	0.0398901	0.0324392	0.0703585	0.120707	0.0517057	0.0165586
417	145.237	167.107	138.211	153.137	145.124	140.072	0.00683647	0.262907	0.0705488	0.163661	0.0998512	0.0311978	0.105834	0.0385867				148.798	144.349	135.51	133.362	135.774	145.52	0.0314928	0.00219141	0.0465163	0.0348292	0.0768222	0.13234	0.054032	0.0185043
418	145.296	165.921	138.133	153.638	142.923	137.183	0.00724548	0.253944	0.0699446	0.167468	0.0831704	0.00992928	0.0986171	0.0392182				147.806	144.397	135.705	133.748	133.345	143.855	0.0246161	0.00252467	0.0480222	0.0378243	0.0575578	0.119384	0.0483216	0.0162325
419	145.152	164.617	135.765	153.045	139.827	137.728	0.00624722	0.244089	0.0516026	0.162962	0.0597068	0.0139415	0.0897583	0.0384093				148.68	144.593	136.618	134.243	135.784	142.95	0.0306748	0.00388547	0.0550731	0.0416653	0.0769015	0.112342	0.0534237	0.015422
420	144.927	163.76	134.43	153.573	144.598	139.189	0.00468744	0.237613	0.0412621	0.166974	0.0958648	0.0246973	0.0951831	0.0371958				146.847	144.843	136.462	134.333	134.65	145.248	0.0179681	0.00562117	0.0538684	0.0423637	0.0679078	0.130224	0.0529921	0.0180477
421	144.862	164.436	134.298	153.266	145.991	140.175	0.00423683	0.242721	0.0402396	0.164642	0.106422	0.0319561	0.0983696	0.0373921				147.767	145.255	136.236	134.913	135.876	149.295	0.0243457	0.00848162	0.052123	0.0468642	0.0776312	0.161715	0.0618601	0.0222081
422	145.052	163.373	134.221	152.895	150.938	139.509	0.00555398	0.234688	0.0396432	0.161822	0.143914	0.0270531	0.102112	0.0373045				146.159	145.255	135.834	135.112	134.267	145.044	0.0131988	0.00848162	0.0490185	0.0484084	0.0648702	0.128636	0.0521023	0.0177575
423	144.834	164.701	134.356	152.341	158.775	145.331	0.00404273	0.244724	0.0406889	0.157613	0.203308	0.0699141	0.120048	0.0392241				143.504	145.202	135.049	135.646	136.226	142.57	-0.0052061	0.00811365	0.0429561	0.052552	0.080407	0.109385	0.0480346	0.0175939
424	145.165	163.344	134.623	152.52	159.617	142.698	0.00633734	0.234469	0.042757	0.158973	0.209689	0.0505302	0.117126	0.0392973				145.695	146.163	134.414	136.409	135.553	141.291	0.00998228	0.0147857	0.0380521	0.0584725	0.0750695	0.0994328	0.0492991	0.0142888
425	145.287	162.879	136.814	152.599	159.786	144.585	0.00718309	0.230954	0.0597279	0.159573	0.21097	0.0644222	0.122138	0.0372265				145.994	145.865	134.53	136.687	135.961	140.283	0.012055	0.0127168	0.0389479	0.0606297	0.0783053	0.0915892	0.0490406	0.0136508
426	145.253	162.527	137.411	152.024	151.64	150.588	0.00694739	0.228294	0.0643522	0.155204	0.149234	0.108616	0.118775	0.0315276				146.634	146.201	135.118	137.661	136.338	134.869	0.0164916	0.0150495	0.043489	0.0681875	0.0812953	0.0494611	0.0456623	0.0109306
427	145.485	162.069	137.551	152.608	155.092	145.941	0.0085557	0.224833	0.0654366	0.159642	0.175396	0.0744049	0.118045	0.0332079				145.38	146.492	134.981	138.696	134.234	137.067	0.00779864	0.0170699	0.0424309	0.0762186	0.0646085	0.0665644	0.0457818	0.0115341
428	145.712	161.998	137.793	151.938	160.231	144.396	0.0101293	0.224296	0.067311	0.15455	0.214343	0.0630308	0.122277	0.0360712				147.701	146.374	134.414	139.102	136.8	137.365	0.0238882	0.0162507	0.0380521	0.079369	0.0849594	0.0688833	0.0519004	0.0120875
429	145.694	162.995	142.009	153.066	162.984	145.209	0.0100046	0.231831	0.0999671	0.163122	0.235207	0.069016	0.134858	0.0371544				146.235	147.062	134.007	138.515	135.803	138.603	0.0137256	0.0210273	0.0349089	0.0748141	0.0770522	0.0785166	0.0500075	0.0123068
430	145.739	162.839	144.769	152.491	162.074	148.862	0.0103165	0.230652	0.121345	0.158752	0.22831	0.0959091	0.140881	0.0343867				147.961	147.459	133.786	137.852	136.405	139.626	0.0256906	0.0237836	0.0332022	0.0696695	0.0818267	0.0864769	0.0534416	0.0118599
431	145.895	161.711	146.17	152.692	162.511	154.402	0.011398	0.222127	0.132197	0.16028	0.231622	0.136694	0.149053	0.0324907				146.373	147.484	133.468	138.446	136.599	136.665	0.0146823	0.0239572	0.0307463	0.0742787	0.0833653	0.0634363	0.048411	0.0117818
432	145.779	161.694	144.623	152.237	160.377	144.601	0.0105938	0.221999	0.120215	0.156822	0.215449	0.06454	0.131603	0.0342091				146.21	147.567	132.969	139.115	135.511	136.471	0.0135523	0.0245335	0.0268927	0.0794698	0.0747364	0.0619268	0.0468519	0.0116534
433	146.064	160.716	144.314	151.116	161.781	154.538	0.0125695	0.214608	0.117821	0.148304	0.22609	0.137695	0.142848	0.0314821				146.434	149.178	132.772	138.826	135.625	136.21	0.0151051	0.0357184	0.0253713	0.0772273	0.0756405	0.0598958	0.0481597	0.0108083
434	145.558	163.109	145.24	150.428	160.018	158.444	0.00906176	0.232693	0.124994	0.143076	0.212728	0.166451	0.148167	0.0324347				145.438	150.239	128.577	138.4	136.172	138.185	0.00820071	0.0430847	-0.00702587	0.0739218	0.0799787	0.075264	0.0455707	0.0153172
435	146.555	162.953	146.506	149.627	160.21	161.015	0.0159733	0.231514	0.1348	0.136989	0.214183	0.185378	0.15314	0.031791				145.912	153.267	129.979	139.847	134.697	136.981	0.0114866	0.0641076	0.0038015	0.0851498	0.0682805	0.0658952	0.0497869	0.0137097
436	147.47	161.939	147.946	148.993	158.679	157.693	0.0223165	0.22385	0.145954	0.132172	0.20258	0.160922	0.147966	0.0288388				144.508	158.994	131.837	140.836	135.863	136.987	0.00175379	0.103869	0.0181505	0.092824	0.0775281	0.0659419	0.0600113	0.0168211
437	147.884	161.222	148.834	148.994	153.851	152.483	0.0251865	0.218432	0.152832	0.132179	0.16599	0.122567	0.136198	0.0261101				145.449	158.655	129.299	141.23	136.265	136.985	0.00827696	0.101516	-0.00145001	0.0958813	0.0807163	0.0659264	0.0584778	0.0181776
438	148.808	163.573	150.287	149.885	150.93	148.719	0.031592	0.236199	0.164087	0.13895	0.143853	0.0948563	0.134923	0.0279798				143.761	161.675	128.22	141.801	136.317	139.266	-0.00342454	0.122483	-0.00978291	0.100312	0.0811287	0.0836756	0.0623986	0.0226524
439	149.176	162.673	151.732	150.168	146.206	153.287	0.0341431	0.229398	0.175279	0.1411	0.108051	0.128486	0.136076	0.0267734				144.777	164.139	129.147	142.277	134.91	137.937	0.00361855	0.13959	-0.00262387	0.104006	0.0699698	0.0733342	0.0646491	0.0227444
440	148.961	164.133	153.046	151.058	145.571	153.235	0.0326526	0.240432	0.185457	0.147863	0.103239	0.128103	0.139624	0.0290001				146.265	160.11	129.032	142.675	135.779	140.417	0.0139336	0.111617	-0.00351199	0.107094	0.0768619	0.0926319	0.0664378	0.0201151
441	149.291	163.387	154.872	151.153	147.411	153.966	0.0349403	0.234794	0.199601	0.148585	0.117184	0.133484	0.144765	0.0283291				149.133	154.363	129.637	142.7	136.083	156.5	0.0338151	0.071717	0.0011603	0.107288	0.0792729	0.217779	0.085172	0.0305424
442	149.177	164.869	155.278	151.874	145.887	155.983	0.03415	0.245994	0.202746	0.154064	0.105634	0.148333	0.148487	0.030217				148.368	158.976	130.491	143.271	134.885	150.584	0.028512	0.103744	0.00775557	0.111719	0.0697716	0.171745	0.0822078	0.024449
443	149.687	163.646	156.502	151.672	145.857	157.286	0.0376855	0.236751	0.212226	0.152529	0.105406	0.157926	0.150421	0.0294783				149.391	160.484	131.247	143.977	135.334	166.936	0.0356036	0.114214	0.013594	0.117197	0.0733326	0.298985	0.108821	0.0416133
444	149.529	164.999	157.733	151.977	147.23	147.978	0.0365902	0.246976	0.221761	0.154847	0.115812	0.0894011	0.144231	0.0327011				150.134	158.123	131.797	143.899	136.095	162.995	0.0407542	0.097822	0.0178415	0.116592	0.0793681	0.268319	0.103449	0.0361597
445	150.529	163.106	157.137	151.843	145.07	143.457	0.0435226	0.23267	0.217145	0.153828	0.0994419	0.0561179	0.133788	0.0329078				148.186	158.463	132.161	145.782	134.735	176.255	0.0272503	0.100183	0.0206526	0.131203	0.0685819	0.371499	0.119895	0.0531935
446	152.338	164.711	156.448	151.295	148.179	144.608	0.0560632	0.2448	0.211808	0.149664	0.123004	0.0645915	0.141655	0.0312181				147.477	159.153	132.438	147.169	135.543	179.403	0.0223354	0.104973	0.0227919	0.141965	0.0749902	0.395995	0.127175	0.057034
447	152.634	162.699	157.481	150.561	145.532	146.367	0.0581152	0.229594	0.219809	0.144087	0.102943	0.0775411	0.138682	0.0296549				146.807	159.074	131.286	147.297	135.751	168.364	0.0176908	0.104425	0.0138952	0.142958	0.0766398	0.310097	0.110951	0.0447291
448	152.37	164.089	155.26	149.997	147.167	145.745	0.0562851	0.240099	0.202606	0.139801	0.115334	0.072962	0.137848	0.0294518				142.63	160.909	131.011	149.334	134.554	167.786	-0.0112648	0.117165	0.0117714	0.158765	0.0671464	0.305599	0.108197	0.0472085
449	151.43	162.005	156.086	149.482	144.47	147.504	0.0497686	0.224349	0.209004	0.135888	0.0948947	0.0859116	0.133303	0.0287088				139.288	159.537	130.691	149.192	133.966	165.126	-0.0344321	0.107639	0.00930013	0.157663	0.062483	0.284901	0.0979257	0.0466376
450	151.249	161.866	157.543	148.628	141.803	148.641	0.0485139	0.223299	0.22029	0.129398	0.0746823	0.0942821	0.131744	0.0304493				139.865	160.522	130.355	149.702	136.403	157.989	-0.0304323	0.114478	0.00670527	0.16162	0.0818108	0.229366	0.0939246	0.0393988
451	150.824	161.515	155.553	146.008	143.836	146.274	0.0455676	0.220646	0.204876	0.109489	0.0900898	0.0768564	0.124587	0.0292198				140.366	160.472	130.414	149.432	136.199	146.259	-0.0269592	0.114131	0.00716091	0.159525	0.0801929	0.13809	0.0786902	0.0303311
452	150.24	162.762	155.893	144.309	148.204	146.548	0.0415191	0.23007	0.207509	0.0965789	0.123194	0.0788736	0.129624	0.0303463				140.723	161.598	130.71	148.218	138.478	136.68	-0.0244845	0.121948	0.00944686	0.150105	0.0982676	0.0635531	0.0698061	0.0274164
453	150.614	162.216	156.652	143.302	153.221	145.728	0.0441118	0.225944	0.213388	0.0889268	0.161216	0.0728368	0.134404	0.0312774				142.063	160.943	130.313	148.041	137.776	141.424	-0.0151954	0.117401	0.00638091	0.148732	0.0927001	0.100468	0.075081	0.0264826
454	150.172	160.88	155.27	142.651	155.981	139.379	0.0410477	0.215847	0.202684	0.08398	0.182133	0.026096	0.125298	0.0346719				142.833	162.577	130.021	148.513	140.39	131.742	-0.00985759	0.128745	0.00412585	0.152394	0.113432	0.0251288	0.0689947	0.0287809
455	150.084	161.267	157.237	141.376	153.885	139.669	0.0404377	0.218772	0.21792	0.0742915	0.166248	0.028231	0.124317	0.0356895				143.084	162.478	130.112	149.367	141.252	133.257	-0.00811762	0.128058	0.00482863	0.159021	0.120268	0.0369175	0.0734959	0.0289788
456	150.06	161.986	157.375	141.227	157.019	143.206	0.0402713	0.224206	0.218988	0.0731593	0.19	0.0542701	0.133482	0.0352789				142.57	162.493	129.951	149.368	136.576	140.856	-0.0116807	0.128162	0.00358526	0.159029	0.0831829	0.0960479	0.0763877	0.0276882
457	149.451	162.597	157.016	140.446	158.913	144.825	0.0360495	0.228823	0.216208	0.0672246	0.204354	0.066189	0.136475	0.0362004				141.31	163.052	129.611	149.505	135.969	148.507	-0.0204153	0.132043	0.000959506	0.160092	0.0783688	0.155583	0.0844385	0.0321719
458	149.596	162.917	160.937	139.801	156.417	145.09	0.0370547	0.231242	0.246579	0.0623234	0.185437	0.0681399	0.138463	0.0380919				141.917	161.149	129.547	149.085	135.865	149.071	-0.0162075	0.118831	0.000465247	0.156833	0.0775439	0.159972	0.0829062	0.0312749
459	149.281	164.432	158.328	139.446	153.868	143.149	0.034871	0.242691	0.22637	0.0596258	0.166119	0.0538505	0.130588	0.0378989				141.854	161.113	129.387	149.046	136.392	147.812	-0.0166442	0.118581	-0.000770401	0.15653	0.0817236	0.150175	0.0815992	0.0306167
460	149.237	163.216	158.786	138.501	152.13	144.592	0.0345659	0.233501	0.229918	0.0524449	0.152948	0.0644737	0.127975	0.0367941				137.883	161.135	132.018	147.53	139.022	143.691	-0.0441718	0.118734	0.0195483	0.144766	0.102582	0.118108	0.0765945	0.0298109
461	148.954	161.669	159.679	138.042	149.864	155.247	0.0326041	0.22181	0.236835	0.048957	0.135774	0.142915	0.136482	0.0345662				137.386	161.558	132.602	146.916	139.532	147.826	-0.0476171	0.121671	0.0240584	0.140002	0.106627	0.150284	0.0825041	0.0318138
462	149.196	162.087	157.397	137.537	151.527	158.58	0.0342817	0.224969	0.219159	0.0451196	0.148378	0.167452	0.139893	0.0339059				137.141	162.074	132.536	146.465	139.071	141.535	-0.0493155	0.125253	0.0235487	0.136503	0.102971	0.101331	0.0733818	0.0293652
463	149.889	161.058	160.436	136.771	158.526	159.97	0.0390859	0.217192	0.242698	0.0392989	0.201421	0.177685	0.152897	0.0369796				136.844	161.036	132.812	145.784	139.019	141.084	-0.0513743	0.118047	0.0256802	0.131218	0.102558	0.0978221	0.0706585	0.0286261
464	150.283	161.652	157.296	136.472	158.452	150.724	0.0418172	0.221681	0.218377	0.0370269	0.20086	0.109617	0.13823	0.0354337				136.873	162.029	133.484	145.579	141.799	141.346	-0.0511733	0.124941	0.0308699	0.129628	0.124606	0.0998608	0.0764554	0.0296713
465	151.408	160.544	159.977	136.412	155.406	150.191	0.0496161	0.213308	0.239143	0.0365709	0.177775	0.105693	0.137018	0.0349384				136.986	161.635	132.796	144.567	148.692	144.224	-0.05039	0.122205	0.0255566	0.121775	0.179275	0.122255	0.0867795	0.0340868
466	151.28	160.646	161.223	135.973	156.933	160.405	0.0487288	0.214079	0.248794	0.0332351	0.189348	0.180888	0.152512	0.0366154				136.326	162.372	131.128	145.139	148.167	143.405	-0.0549652	0.127322	0.012675	0.126213	0.175111	0.115883	0.0837065	0.0352962
467	151.35	160.654	157.587	135.906	156.456	155.938	0.049214	0.214139	0.220631	0.0327259	0.185733	0.148002	0.141741	0.0336081				136.044	161.528	130.577	146.173	148.191	142.66	-0.0569201	0.121462	0.00841973	0.134237	0.175301	0.110085	0.0820976	0.0358202
468	151.182	162.239	159.142	135.901	151.426	146.043	0.0480494	0.226118	0.232675	0.0326879	0.147612	0.0751558	0.12705	0.0361627				136.616	160.384	133.021	147.184	147.918	139.635	-0.0529549	0.11352	0.0272942	0.142082	0.173136	0.0865469	0.081604	0.0337315
469	150.941	161.55	157.523	135.94	154.889	144.521	0.0463787	0.220911	0.220135	0.0329843	0.173857	0.063951	0.126369	0.0360557				136.729	161.132	132.89	147.206	147.113	141.01	-0.0521715	0.118713	0.0262826	0.142252	0.166752	0.0972462	0.0831791	0.0334124
470	150.495	163.495	159.156	136.212	159.322	143.697	0.0432869	0.23561	0.232784	0.0350512	0.207454	0.0578848	0.135345	0.0405301				137.168	160.211	133.496	147.45	145.295	143.193	-0.0491283	0.112319	0.0309626	0.144146	0.152333	0.114233	0.0841441	0.0319055
471	150.112	162.877	157.836	136.761	164.941	142.873	0.0406318	0.230939	0.222559	0.0392229	0.250038	0.0518186	0.139202	0.0428161				137.353	161.442	133.728	146.029	146.11	143.499	-0.0478459	0.120865	0.0327543	0.133119	0.158797	0.116614	0.0857173	0.0318443
472	150.219	164.492	158.797	136.492	162.393	141.715	0.0413735	0.243145	0.230003	0.0371788	0.230728	0.0432935	0.13762	0.0434313				137.599	160.738	133.035	146.205	141.357	142.318	-0.0461406	0.115978	0.0274024	0.134485	0.121101	0.107424	0.0767083	0.0290501
473	150.235	163.889	158.413	136.754	160.69	142.561	0.0414845	0.238588	0.227029	0.0391697	0.217821	0.0495216	0.135602	0.0413489				138.864	161.705	132.567	147.461	138.649	139.999	-0.0373714	0.122691	0.0237881	0.144231	0.0996238	0.0893793	0.0737237	0.0277613
474	150.714	165.072	160.248	137.599	159.735	141.333	0.0448051	0.247528	0.241242	0.0455907	0.210584	0.0404812	0.138372	0.0426839				138.885	162.303	132.224	145.329	135.892	139.254	-0.0372258	0.126843	0.0211392	0.127688	0.0777581	0.0835822	0.0666307	0.0262172
475	150.148	162.142	162.62	136.544	144.257	138.756	0.0408813	0.225385	0.259615	0.037574	0.0932804	0.0215096	0.113041	0.0423382				139.224	161.894	132.008	144.329	137.633	143.152	-0.0348758	0.124003	0.0194711	0.119928	0.0915659	0.113914	0.0723344	0.0266597
476	149.427	161.726	159.344	136.511	146.187	141.999	0.0358831	0.222241	0.23424	0.0373232	0.107907	0.0453843	0.11383	0.0378155				140.296	161.115	129.929	143.57	141.272	144.083	-0.0274445	0.118595	0.00341536	0.114039	0.120427	0.121158	0.0750316	0.0278316
477	149.264	162.368	160.892	135.793	147.284	143.605	0.0347531	0.227093	0.24623	0.0318673	0.116221	0.0572075	0.118895	0.0393222				143.104	160.129	129.719	142.991	139.083	146.144	-0.00797897	0.111749	0.00179357	0.109546	0.103066	0.137196	0.0758952	0.0254557
478	149.159	161.58	158.366	135.347	148.379	144.637	0.0340252	0.221137	0.226664	0.0284782	0.12452	0.064805	0.116605	0.0366841				145.265	160.888	130.023	142.635	140.338	151.952	0.00700144	0.117019	0.0041413	0.106783	0.113019	0.18239	0.0883923	0.0284736
479	149.64	160.727	157.966	135.227	148.514	146.514	0.0373597	0.214691	0.223566	0.0275663	0.125543	0.0786233	0.117892	0.0350151				146.657	160.519	129.783	142.54	139.761	154.052	0.016651	0.114457	0.00228783	0.106046	0.108443	0.19873	0.0911026	0.0294869
480	149.731	160.655	157.898	135.092	143.981	147.853	0.0379905	0.214147	0.223039	0.0265405	0.0911887	0.0884809	0.113564	0.0348884				147.809	161.477	130.556	142.49	143.416	157.365	0.0246369	0.121108	0.00825755	0.105658	0.137431	0.22451	0.1036	0.0323522
481	148.974	160.054	156.847	134.121	144.925	146.186	0.0327427	0.209605	0.214899	0.019162	0.098343	0.0762086	0.108493	0.0348373				148.585	160.853	130.6	141.614	146.215	153.935	0.0300162	0.116776	0.00859735	0.098861	0.15963	0.19782	0.10195	0.0297974
482	148.876	159.325	159.418	134.212	150.745	140.768	0.0320634	0.204095	0.234813	0.0198535	0.142451	0.0363217	0.1116	0.0387724				148.291	161.441	129.897	141.372	146.491	154.184	0.0279782	0.120858	0.00316823	0.0969832	0.161819	0.199758	0.101761	0.0309635
483	149.102	159.934	156.957	133.546	154.388	140.664	0.0336301	0.208698	0.215751	0.0147927	0.17006	0.0355561	0.113081	0.0386925				146.622	161.446	130.147	143.935	147.718	153.395	0.0164084	0.120893	0.00509893	0.116871	0.17155	0.193618	0.104073	0.0318847
484	148.821	161.415	158.465	133.608	154.362	139.464	0.0316821	0.21989	0.227431	0.0152638	0.169863	0.0267218	0.115142	0.0413662				147.769	160.305	129.406	146.13	147.733	155.002	0.0243596	0.112971	-0.000623667	0.133903	0.171669	0.206123	0.108067	0.0332527
485	148.879	161.946	157.415	132.941	155.158	140.666	0.0320842	0.223903	0.219298	0.0101954	0.175896	0.0355708	0.116158	0.0410716				145.814	159.419	132.557	145.045	151.736	156.673	0.0108072	0.10682	0.0237109	0.125484	0.203417	0.219125	0.114894	0.0356025
486	148.791	160.253	156.847	132.923	153.065	142.988	0.0314741	0.211109	0.214899	0.0100586	0.160034	0.0526652	0.113373	0.037905				147.298	158.414	132.602	145.132	151.071	154.612	0.0210945	0.0998424	0.0240584	0.126159	0.198143	0.203088	0.112064	0.0326922
487	148.992	159.488	159.868	132.207	142.06	153.056	0.0328675	0.205327	0.238299	0.00461788	0.07663	0.126785	0.114088	0.0382525				145.427	158.962	132.651	144.538	148.108	152.581	0.00812446	0.103647	0.0244368	0.12155	0.174643	0.187284	0.103281	0.0304161
488	149.402	160.689	157.368	132.345	139.706	151.183	0.0357098	0.214404	0.218934	0.00566652	0.0587898	0.112996	0.10775	0.037315				146.336	158.81	132.875	143.378	137.897	142.876	0.0144258	0.102592	0.0261667	0.112549	0.0936597	0.111766	0.0768598	0.0181699
489	149.723	159.987	159.017	131.761	143.143	153.434	0.0379351	0.209098	0.231707	0.00122881	0.0848378	0.129568	0.115729	0.0376283				145.551	159.363	133.52	142.182	138.432	138.265	0.00898404	0.106431	0.0311479	0.103268	0.0979028	0.0758865	0.0706035	0.0168102
490	149.912	159.485	158.137	131.933	144.393	147.883	0.0392453	0.205304	0.224891	0.0025358	0.0943111	0.0887017	0.109165	0.0363011				145.435	159.534	134.364	141.824	138.842	136.057	0.00817991	0.107618	0.037666	0.10049	0.101154	0.0587053	0.0689691	0.0166371
491	150.03	160.454	158.805	132.286	141.4	147.812	0.0400633	0.212628	0.230065	0.00521819	0.0716281	0.0881791	0.107964	0.0377457				144.712	159.364	135.07	141.469	142.628	136.839	0.00316795	0.106438	0.0431183	0.0977358	0.131181	0.0647903	0.0744053	0.0190963
492	150.174	160.804	156.721	131.509	146.991	144.087	0.0410616	0.215273	0.213923	-0.000686098	0.114001	0.0607559	0.107388	0.0370973				144.618	160.07	134.508	141.258	146.802	140.802	0.00251633	0.11134	0.038778	0.0960986	0.164285	0.0956277	0.0847743	0.0232062
493	150.511	160.416	158.166	131.87	151.2	149.31	0.0433978	0.21234	0.225115	0.00205708	0.145899	0.0992072	0.121336	0.0367182				145.723	160.98	134.594	141.061	144.732	144.295	0.0101764	0.117658	0.0394422	0.0945699	0.147868	0.122808	0.0887537	0.0217021
494	150.604	160.294	154.883	131.414	147.29	140.533	0.0440425	0.211418	0.199686	-0.00140799	0.116267	0.0345917	0.100766	0.036654				140.682	161.571	134.392	141.023	142.079	146.537	-0.0247687	0.121761	0.0378822	0.0942751	0.126827	0.140254	0.0827051	0.0261263
495	150.451	159.143	153.774	132.085	148.891	145.665	0.0429818	0.20272	0.191096	0.00369083	0.1284	0.072373	0.106877	0.0329962				139.822	160.563	133.963	140.459	138.185	144.332	-0.0307303	0.114763	0.0345691	0.0898987	0.0959438	0.123096	0.0712566	0.024003
496	150.412	158.489	152.899	133.944	157.614	147.481	0.0427115	0.197777	0.184318	0.017817	0.194509	0.0857423	0.120479	0.0333291				138.391	160.358	134.29	140.271	137.697	142.996	-0.0406503	0.113339	0.0370945	0.0884399	0.0920735	0.1127	0.0671661	0.0243632
497	150.125	158.28	152.219	135.544	153.911	146.847	0.0407219	0.196198	0.179051	0.0299752	0.166445	0.0810748	0.115578	0.0301317				138.1	160.15	133.673	139.738	137.862	145.389	-0.0426675	0.111895	0.0323295	0.084304	0.0933821	0.131321	0.0684273	0.0260544
498	149.8	158.837	151.19	137.407	160.723	147.444	0.0384689	0.200407	0.171081	0.0441318	0.218071	0.0854699	0.126272	0.0326865				138.136	160.626	133.054	139.299	138.701	147.578	-0.042418	0.1152	0.0275491	0.0808976	0.100036	0.148354	0.0716032	0.0280641
499	149.455	159.361	150.562	136.883	163.908	146.124	0.0360772	0.204367	0.166217	0.04015	0.242209	0.0757521	0.127462	0.0361625				137.728	160.25	133.521	138.819	138.187	146.941	-0.0452463	0.112589	0.0311556	0.077173	0.0959597	0.143397	0.0691715	0.0275154
500	149.511	159.306	149.915	135.628	164.304	148.204	0.0364654	0.203952	0.161205	0.0306135	0.245211	0.0910649	0.128085	0.0364401				139.536	159.399	133.786	138.599	137.364	146.894	-0.0327129	0.106681	0.0332022	0.0754659	0.0894325	0.143032	0.0691834	0.0251573
501	149.36	159.074	149.468	136.414	157.097	146.152	0.0354186	0.202198	0.157743	0.0365861	0.190591	0.0759583	0.116416	0.0311655				138.609	158.623	133.953	138.325	136.673	147.485	-0.0391391	0.101293	0.0344919	0.0733398	0.0839522	0.14763	0.0669281	0.0260302
502	149.336	159.088	149.69	136.612	154.314	143.462	0.0352523	0.202304	0.159462	0.0380907	0.169499	0.0561547	0.110127	0.0306399				138.502	159.284	134.235	137.931	136.704	149.944	-0.0398808	0.105883	0.0366697	0.0702825	0.084198	0.166765	0.0706528	0.0283048
503	149.139	159.368	150.897	135.419	151.512	143.913	0.0338866	0.20442	0.168811	0.0290253	0.148264	0.059475	0.107314	0.0309288				139.026	158.364	133.676	137.809	136.534	149.103	-0.0362484	0.0994953	0.0323527	0.0693359	0.0828498	0.160221	0.068001	0.0269922
504	148.983	159.404	148.533	135.706	147.168	146.377	0.0328051	0.204692	0.1505	0.0312062	0.115342	0.0776147	0.102027	0.0279704				138.257	157.623	134.959	137.759	131.526	147	-0.0415792	0.0943506	0.042261	0.0689479	0.0431314	0.143856	0.0584947	0.0252955
505	149.186	159.73	148.145	135.303	147.428	145.379	0.0342124	0.207156	0.147495	0.0281438	0.117312	0.0702675	0.100765	0.0285247				140.033	157.382	135.033	137.567	132.199	149.067	-0.0292677	0.0926774	0.0428325	0.0674581	0.0484689	0.15994	0.063685	0.025447
506	149.014	163.18	147.239	134.732	145.411	144.821	0.03302	0.233229	0.140477	0.0238049	0.102026	0.0661596	0.0997862	0.032057				141.769	156.606	134.288	132.511	134.174	147.509	-0.0172334	0.0872898	0.037079	0.0282258	0.0641326	0.147817	0.0578852	0.0230556
507	148.973	160.528	146.897	135.936	146.754	144.326	0.0327358	0.213187	0.137828	0.0329539	0.112204	0.0625154	0.0985708	0.0287539				141.57	156.501	134.488	132.942	137.53	145.675	-0.0186129	0.0865608	0.0386236	0.0315701	0.090749	0.133546	0.0604061	0.021988
508	149.341	160.419	147.272	135.607	146.799	144.056	0.0352869	0.212363	0.140733	0.0304539	0.112545	0.0605277	0.0986517	0.0288754				141.699	157.387	134.135	135.216	139.445	150.661	-0.0177187	0.0927121	0.0358974	0.0492154	0.105937	0.172344	0.0730645	0.0267798
509	150.263	161.474	146.541	136.492	148.872	144.626	0.0416786	0.220336	0.135071	0.0371788	0.128256	0.064724	0.104541	0.0288547				141.934	157.192	133.916	135.971	137.183	148.135	-0.0160896	0.0913583	0.0342061	0.0550738	0.087997	0.152688	0.067539	0.0234496
510	153.659	163.076	145.884	136.108	148.752	141.665	0.0652209	0.232443	0.129982	0.0342609	0.127347	0.0429254	0.105363	0.0304435				141.335	157.392	131.935	135.796	136.292	150.824	-0.020242	0.0927468	0.0189073	0.0537159	0.0809305	0.173612	0.0666118	0.0272781
511	153.349	160.505	148.812	136.704	149.409	142.732	0.0630718	0.213013	0.152662	0.0387898	0.132326	0.0507805	0.10844	0.0281043				140.971	156.801	132.079	135.14	137.382	146.468	-0.0227653	0.0886436	0.0200194	0.0486256	0.0895752	0.139717	0.0606359	0.023541
512	152.03	160.511	145.585	136.195	148.946	141.813	0.0539281	0.213058	0.127666	0.034922	0.128817	0.0440149	0.100401	0.0282071				140.572	156.073	134.254	139.285	137.039	139.934	-0.0255312	0.0835892	0.0368165	0.080789	0.0868549	0.0888735	0.0585653	0.0186049
513	154.291	159.161	147.968	136.334	147.589	141.689	0.0696021	0.202856	0.146124	0.0359782	0.118533	0.0431021	0.102699	0.026625				140.796	155.158	133.198	141.333	137.206	147.933	-0.0239784	0.0772365	0.0286612	0.0966805	0.0881794	0.151116	0.0696493	0.0246405
514	156.621	159.454	147.3	136.513	154.798	141.415	0.0857546	0.20507	0.14095	0.0373384	0.173167	0.0410849	0.113894	0.0285845				143.462	154.567	134.248	141.523	134.521	153.468	-0.00549726	0.0731333	0.0367701	0.0981548	0.0668847	0.194186	0.077272	0.0275204
515	156.104	159.861	147.891	137.03	157.315	141.135	0.0821705	0.208146	0.145528	0.041267	0.192243	0.0390236	0.118063	0.030444				146.3	153.975	134.951	141.183	134.105	153.875	0.0141762	0.0690232	0.0421992	0.0955166	0.0635854	0.197353	0.080309	0.0259252
516	156.692	159.117	147.968	137.111	157.01	141.268	0.0862468	0.202523	0.146124	0.0418825	0.189932	0.0400027	0.117785	0.0294362				146.075	153.274	135.3	140.521	136.613	153.83	0.0126165	0.0641562	0.0448945	0.0903798	0.0834763	0.197003	0.0820877	0.0256952
517	157.097	157.547	146.902	140.015	157.003	141.532	0.0890544	0.190658	0.137867	0.0639495	0.189879	0.0419462	0.118892	0.0260635				145.121	152.712	136.028	140.719	140.733	151.93	0.00600321	0.0602543	0.0505167	0.0919162	0.116152	0.182218	0.0845101	0.0248396
518	157.095	156.612	146.453	139.597	153.938	141.956	0.0890405	0.183592	0.134389	0.0607732	0.16665	0.0450677	0.113252	0.0232631				146.662	152.266	136.347	139.825	144.375	150.714	0.0166857	0.0571578	0.0529803	0.0849791	0.145037	0.172756	0.088266	0.024296
519	157.762	153.965	144.464	139.79	153.787	142.475	0.0936644	0.163587	0.118983	0.0622398	0.165505	0.0488885	0.108811	0.0202543				150.828	152.438	136.678	138.81	140.639	152.926	0.0455651	0.058352	0.0555365	0.0771032	0.115406	0.189969	0.090322	0.0223373
520	156.457	154.21	146.764	139.669	154.712	141.331	0.0846177	0.165439	0.136798	0.0613203	0.172516	0.0404665	0.110193	0.0227658				151.758	153.209	137.303	139.071	141.931	152.312	0.052012	0.0637049	0.0603633	0.0791284	0.125653	0.185191	0.0943421	0.0210953
521	157.651	151.179	147.527	140.953	155.095	144.196	0.0928949	0.142532	0.142708	0.0710772	0.175418	0.0615584	0.114365	0.0186615				152.027	152.974	135.897	139.947	146.242	150.165	0.0538768	0.0620734	0.049505	0.0859258	0.159844	0.168484	0.0966182	0.0219973
522	159.538	149.065	149.218	138.592	151.131	142.638	0.105976	0.126555	0.155806	0.0531364	0.145376	0.0500885	0.106157	0.0185959				152.026	152.812	137.39	140.627	150.117	157.165	0.0538698	0.0609486	0.0610351	0.0912023	0.190576	0.222954	0.113431	0.0302699
523	157.689	150.682	149.064	138.484	144.14	141.679	0.0931583	0.138776	0.154613	0.0523157	0.0923937	0.0430284	0.0957143	0.0182576				150.705	152.523	136.37	139.337	144.968	157.215	0.0447124	0.0589422	0.0531579	0.0811925	0.14974	0.223343	0.101848	0.0288429
524	158.745	148.164	148.116	137.291	142.14	142.368	0.100479	0.119746	0.14727	0.0432503	0.0772363	0.0481008	0.0893472	0.0167093				150.821	153.043	136.857	138.823	144.13	159.533	0.0455166	0.0625524	0.0569189	0.0772041	0.143094	0.24138	0.104444	0.0308076
525	157.702	148.838	147.279	137.496	142.249	143.758	0.0932485	0.12484	0.140787	0.0448081	0.0780624	0.0583339	0.0900133	0.0152657				150.869	152.1	135.155	138.883	144.57	158.334	0.0458493	0.0560053	0.0437747	0.0776696	0.146583	0.23205	0.100322	0.0306237
526	157.71	147.46	146.896	138.181	141.592	142.071	0.0933039	0.114426	0.137821	0.0500133	0.0730832	0.0459143	0.0857602	0.0148494				150.543	151.093	135.468	138.981	145.739	149.257	0.0435894	0.0490139	0.0461919	0.0784301	0.155855	0.161419	0.0890831	0.0225974
527	159.089	147.391	146.325	136.706	141.841	142.656	0.102864	0.113904	0.133398	0.038805	0.0749703	0.050221	0.0856937	0.0152076				150.251	149.606	135.828	138.743	141.737	132.014	0.0415652	0.0386899	0.0489721	0.0765833	0.124115	0.0272453	0.0595284	0.0145749
528	158.897	146.222	146.534	137.907	145.553	143.625	0.101533	0.10507	0.135017	0.0479312	0.103102	0.0573547	0.0916679	0.0133879				146.015	148.995	137.076	138.685	139.795	130	0.0122006	0.0344478	0.0586102	0.0761332	0.108713	0.0115737	0.0502797	0.0156536
529	155.437	145.092	146.598	138.832	149.239	144.918	0.0775466	0.0965296	0.135512	0.0549601	0.131038	0.0668737	0.0937433	0.0137012				140.584	148.543	136.128	139.06	139.347	134.694	-0.025448	0.0313097	0.051289	0.0790431	0.10516	0.0480993	0.0482421	0.0181792
530	153.681	147.02	144.762	141.257	148.292	143.298	0.0653734	0.1111	0.121291	0.0733873	0.12386	0.0549474	0.09166	0.0124706				141.984	147.399	138.007	138.887	136.623	135.61	-0.015743	0.0233671	0.0658001	0.0777007	0.0835556	0.055227	0.0483179	0.0154755
531	155.177	146.946	143.745	144.871	145.256	144.415	0.0757442	0.110541	0.113414	0.100849	0.100852	0.0631706	0.0940951	0.00822199				141.224	146.913	138.342	139.203	131.962	136.124	-0.0210114	0.0199928	0.0683873	0.0801527	0.0465893	0.0592266	0.0422229	0.0151923
532	156.3	146.473	142.875	145.061	147.881	143.8	0.0835293	0.106966	0.106675	0.102293	0.120746	0.0586431	0.0964754	0.00901087				140.69	146.545	138.338	138.796	133.576	139.916	-0.0247132	0.0174379	0.0683564	0.0769946	0.0593899	0.0887335	0.0476998	0.0175734
533	157.111	146.221	143.086	144.612	147.287	141.528	0.0891514	0.105062	0.108309	0.0988813	0.116244	0.0419168	0.0932608	0.0109219				142.199	146.149	137.276	138.619	133.753	140.567	-0.0142526	0.0146885	0.0601547	0.0756211	0.0607937	0.0937991	0.0484674	0.016488
534	159.226	146.056	141.655	144.245	148.84	138.777	0.103813	0.103815	0.0972251	0.0960925	0.128014	0.0216642	0.0917706	0.0147953				143.916	145.933	136.685	138.658	135.185	134.842	-0.00235005	0.0131889	0.0555906	0.0759237	0.0721509	0.049251	0.0439592	0.0130015
535	160.35	145.418	145.08	144.012	154.592	144.386	0.111605	0.0989933	0.123754	0.094322	0.171606	0.0629571	0.11054	0.0147934				143.561	145.49	135.389	138.73	134.784	135.856	-0.00481097	0.0101132	0.0455818	0.0764824	0.0689705	0.0571412	0.0422464	0.0133744
536	159.735	144.083	146.843	143.335	156.455	141.045	0.107342	0.0889041	0.13741	0.0891776	0.185725	0.038361	0.10782	0.020392				142.117	145.806	134.876	138.685	135.98	133.549	-0.014821	0.0123071	0.04162	0.0761332	0.078456	0.0391897	0.0388142	0.0147779
537	159.957	143.99	143.753	142.762	155.093	139.526	0.108881	0.0882013	0.113476	0.0848235	0.175403	0.0271782	0.0996605	0.0196791				142.271	146.415	134.668	138.195	135.634	134.611	-0.0137535	0.0165353	0.0400137	0.0723311	0.0757119	0.0474535	0.0397153	0.0139233
538	159.274	142.843	141.193	144.308	150.251	138.063	0.104146	0.0795328	0.0936466	0.0965713	0.138707	0.0164078	0.0881686	0.0164664				147.64	145.518	134.451	137.884	137.64	139.351	0.0234653	0.0103076	0.0383378	0.0699178	0.0916214	0.084337	0.0529978	0.0137474
539	159.599	142.438	139.509	143.099	152.516	137.471	0.106399	0.0764721	0.0806028	0.0873843	0.155873	0.0120495	0.0864634	0.0190504				144.379	145.299	134.552	137.857	138.977	139.386	0.000859543	0.00878711	0.0391178	0.0697083	0.102225	0.0846093	0.0508846	0.0168728
540	158.233	142.029	140.629	142.221	161.269	138.264	0.0969295	0.073381	0.089278	0.0807125	0.222209	0.0178875	0.096733	0.0275793				147.461	145.808	134.201	136.161	137.161	137.916	0.0222245	0.012321	0.0364071	0.0565481	0.0878225	0.0731708	0.0480823	0.0120612
541	155.993	140.784	139.463	140.94	162.085	138.367	0.081401	0.063972	0.0802465	0.0709784	0.228393	0.0186458	0.0906062	0.0291263				148.876	144.713	133.499	133.315	135.104	138.487	0.0320335	0.00471861	0.0309857	0.0344645	0.0715084	0.0776139	0.0418874	0.011264
542	156.473	140.61	139.728	139.582	165.254	137.183	0.0847286	0.062657	0.0822991	0.0606592	0.25241	0.00992928	0.0921139	0.0338906				150.718	143.131	133.984	135.407	135.983	137.983	0.0448026	-0.00626496	0.0347313	0.0506974	0.0784798	0.0736921	0.046023	0.0125218
543	158.873	140.238	139.878	138.717	165.317	140.751	0.101366	0.0598456	0.0834609	0.0540862	0.252888	0.0361966	0.0979739	0.0323609				149.248	143.014	131.938	138.202	136.174	136.034	0.0346123	-0.00707727	0.0189305	0.0723854	0.0799946	0.0585263	0.0428953	0.0136998
544	158.768	139.986	139.433	138.385	161.552	143.668	0.100638	0.0579411	0.0800141	0.0515634	0.224354	0.0576713	0.0953637	0.0268586				149.36	142.78	132.076	137.874	135.865	137.676	0.0353887	-0.0087019	0.0199962	0.0698402	0.0775439	0.0713033	0.0442284	0.0141019
545	158.167	139.942	138.699	137.844	162.436	139.473	0.096472	0.0576086	0.0743287	0.0474525	0.231054	0.0267881	0.0889506	0.0300179				149.684	141.431	134.783	137.411	135.263	136.57	0.0376347	-0.0180678	0.0409018	0.0662476	0.0727695	0.0626971	0.0436971	0.0136311
546	158.547	143.023	138.503	138.266	160.699	144.24	0.0991063	0.0808932	0.0728105	0.0506592	0.217889	0.0618823	0.0972068	0.0250624				149.405	141.721	131.945	137.607	135.115	133.571	0.0357006	-0.0160544	0.0189845	0.0677684	0.0715957	0.0393609	0.036226	0.0132747
547	155.05	143.434	137.89	137.84	153.847	145.559	0.0748638	0.0839993	0.0680624	0.0474221	0.16596	0.0715927	0.0853167	0.0168685				148.426	141.761	134.364	137.445	134.665	134.683	0.028914	-0.0157766	0.037666	0.0665114	0.0680267	0.0480137	0.0388925	0.0126288
548	154.62	143.991	137.692	138.901	150.891	145.363	0.0718829	0.0882088	0.0665287	0.0554844	0.143558	0.0701497	0.0826353	0.0129237				147.35	140.522	134.878	136.15	134.51	132.274	0.021455	-0.0243788	0.0416355	0.0564628	0.0667974	0.0292685	0.0318734	0.0131647
549	153.751	143.24	137.42	139.811	149.058	149.346	0.0658587	0.0825332	0.0644219	0.0623993	0.129666	0.0994722	0.0840585	0.0108103				147.234	141.114	135.428	136.015	134.202	126.396	0.0206509	-0.0202687	0.045883	0.0554152	0.0643547	-0.0164702	0.0249275	0.014942
550	153.939	143.62	136.992	139.458	154.884	147.835	0.0671619	0.085405	0.0611067	0.059717	0.173819	0.0883484	0.0892597	0.0176254				147.086	140.979	136.05	135.728	133.471	128.121	0.0196249	-0.0212059	0.0506866	0.0531883	0.0585571	-0.0030474	0.0263006	0.0135657
551	152.282	144.799	136.72	139.49	155.613	151.421	0.055675	0.0943153	0.0589998	0.0599601	0.179344	0.114748	0.0938404	0.0196355				147.661	140.315	135.749	134.661	133.605	129.374	0.0236109	-0.025816	0.048362	0.0449088	0.0596199	0.00670261	0.0262314	0.0129751
552	149.423	144.924	136.348	138.547	155.015	155.951	0.0358554	0.0952599	0.0561184	0.0527944	0.174812	0.148098	0.093823	0.023074				144.89	140.879	136.416	134.721	133.833	130.95	0.00440188	-0.0219002	0.0535131	0.0453744	0.0614282	0.018966	0.0269639	0.0131559
553	149.519	145.476	136.513	140.815	154.365	158.822	0.0365209	0.0994317	0.0573965	0.0700286	0.169886	0.169234	0.100416	0.0233949				147.38	140.167	135.322	134.189	133.63	131.615	0.021663	-0.0268435	0.0450644	0.0412463	0.0598182	0.0241406	0.0275148	0.0123024
554	150.957	145.387	136.177	144.383	154.464	163.532	0.0464896	0.0987591	0.0547939	0.0971412	0.170636	0.203908	0.111955	0.02572				146.947	140.215	134.705	133.592	132.199	131.848	0.0186614	-0.0265103	0.0402994	0.0366139	0.0484689	0.0259536	0.0239145	0.0109652
555	152.751	144.351	136.076	145.007	153.631	170.449	0.0589263	0.0909295	0.0540116	0.101883	0.164323	0.254831	0.120817	0.0313037				145.507	140.147	134.374	138.11	133.35	131.663	0.00867903	-0.0269824	0.0377432	0.0716715	0.0575975	0.0245141	0.0288705	0.0144708
556	154.325	148.136	135.685	144.815	153.127	171.136	0.0698378	0.119535	0.050983	0.100424	0.160503	0.259888	0.126862	0.0308706				151.208	139.418	135.243	139.623	133.853	132.129	0.0481993	-0.0320437	0.0444543	0.0834117	0.0615868	0.0281402	0.0389581	0.0160853
557	154.615	146.214	135.519	144.539	149.408	157.614	0.0718482	0.105009	0.0496972	0.0983266	0.132318	0.160341	0.102923	0.0163146				155.037	139.9	134.974	141.075	134.119	131.27	0.0747426	-0.0286973	0.0423769	0.0946786	0.0636964	0.021456	0.0447089	0.017976
558	154.128	145.866	135.533	142.744	155.279	157.151	0.0684722	0.102379	0.0498056	0.0846867	0.176813	0.156932	0.106515	0.0205268				153.382	140.122	136.323	141.069	134.093	132.12	0.0632699	-0.027156	0.0527949	0.094632	0.0634902	0.0280702	0.0458502	0.0170182
559	154.092	144.83	135.14	141.878	158.359	153.866	0.0682226	0.0945495	0.0467615	0.0781061	0.200155	0.132748	0.103424	0.0226468				153.608	139.309	135.23	141.247	134.087	132.218	0.0648365	-0.0328005	0.0443539	0.0960132	0.0634426	0.0288327	0.0441131	0.0179313
560	154.994	144.905	135.235	141.362	158.378	155.837	0.0744756	0.0951164	0.0474974	0.0741851	0.200299	0.147258	0.106472	0.023195				150.451	139.481	136.138	141.042	130.631	132.206	0.0429517	-0.0316063	0.0513662	0.0944225	0.0360331	0.0287394	0.0369844	0.0166485
561	155.427	144.723	134.905	140.747	156.439	157.177	0.0774773	0.0937409	0.0449413	0.0695118	0.185604	0.157123	0.104733	0.022334				151.315	139.991	134.186	139.977	130.554	131.915	0.0489411	-0.0280655	0.0362913	0.0861586	0.0354224	0.026475	0.0342038	0.0151212
562	155.244	145.717	134.69	139.516	157.632	169.357	0.0762087	0.101253	0.043276	0.0601577	0.194646	0.246791	0.120389	0.0333586				150.657	140.475	133.59	140.195	130.282	128.978	0.0443797	-0.0247051	0.0316885	0.0878502	0.0332652	0.0036212	0.0293499	0.0155487
563	154.844	146.122	134.868	142.001	155.377	174.438	0.0734357	0.104314	0.0446547	0.0790408	0.177556	0.284197	0.1272	0.036392				154.395	139.898	133.956	139.132	129.378	130.059	0.0702921	-0.0287111	0.0345151	0.0796018	0.0260956	0.0120328	0.0323044	0.0161837
564	154.505	146.952	134.546	142.006	155.329	172.276	0.0710857	0.110587	0.0421606	0.0790788	0.177192	0.268281	0.124731	0.0343213				156.068	139.618	133.976	138.618	132.403	133.621	0.0818897	-0.0306551	0.0346695	0.0756134	0.0500868	0.0397499	0.0418924	0.0164559
565	154.281	146.694	134.483	144.364	152.403	168.523	0.0695328	0.108637	0.0416726	0.0969968	0.155017	0.240652	0.118751	0.0289333				157.486	139.692	133.481	138.334	134.587	132.875	0.0917195	-0.0301414	0.0308467	0.0734096	0.0674081	0.0339451	0.0445313	0.017757
566	152.989	147.706	134.299	144.336	147.238	166.433	0.0605762	0.116285	0.0402474	0.096784	0.115873	0.225265	0.109172	0.0263557				157.549	140.451	135.54	137.318	136.54	130.118	0.0921562	-0.0248718	0.046748	0.0655259	0.0828973	0.0124919	0.0458246	0.0182748
567	152.992	148.45	134.112	142.787	140.348	163.357	0.060597	0.121908	0.0387989	0.0850135	0.0636553	0.20262	0.095432	0.02431				157.065	140.871	134.341	140.089	137.329	129.624	0.088801	-0.0219558	0.0374883	0.0870277	0.0891549	0.00864794	0.048194	0.0195229
568	153.566	148.043	135.115	142.573	141.119	158.513	0.0645762	0.118832	0.0465679	0.0833873	0.0694985	0.166959	0.0916367	0.0180135				155.734	140.256	134.247	140.62	134.511	131.929	0.0795743	-0.0262256	0.0367624	0.091148	0.0668054	0.0265839	0.0457747	0.017585
569	153.426	147.53	138.343	139.816	141.23	165.221	0.0636056	0.114955	0.0715712	0.0624373	0.0703397	0.216343	0.0998752	0.0246188				151.451	141.396	132.2	141.011	136.7	131.538	0.0498838	-0.0183108	0.0209538	0.094182	0.0841663	0.0235414	0.0424028	0.0173043
570	152.923	145.997	140.464	142.218	142.616	166.989	0.0601187	0.103369	0.088	0.0806897	0.0808438	0.229358	0.107063	0.0251131				150.596	141.975	132.472	141.012	137.972	131.491	0.0439568	-0.0142909	0.0230544	0.0941897	0.0942545	0.0231757	0.0440567	0.0176207
571	152.757	145.781	139.496	143.743	144.597	162.715	0.0589679	0.101737	0.0805021	0.0922779	0.0958572	0.197894	0.104539	0.0196665				154.892	143.469	132.268	141.425	138.044	133.547	0.0737374	-0.00391828	0.021479	0.0973944	0.0948256	0.0391741	0.053782	0.0169027
572	152.459	144.651	142.873	144.445	146.546	163.963	0.056902	0.0931968	0.106659	0.0976123	0.110628	0.207081	0.112013	0.0205485				154.417	145.822	132.843	142.325	137.043	131.886	0.0704446	0.0124182	0.0259196	0.104378	0.0868866	0.0262493	0.0543827	0.0154668
573	152.436	144.185	144.16	144.204	146.958	162.516	0.0567426	0.089675	0.116628	0.095781	0.11375	0.196429	0.111501	0.0191189				156.338	146.512	133.768	142.839	138.074	133.167	0.0837613	0.0172088	0.0330632	0.108366	0.0950635	0.0362172	0.0622801	0.0155182
574	152.827	142.72	147.687	144.243	153.698	158.684	0.0594532	0.0786033	0.143948	0.0960773	0.164831	0.168218	0.118522	0.0190149				154.904	147.48	132.685	144.578	137.772	132.673	0.0738206	0.0239294	0.0246994	0.12186	0.0926683	0.0323732	0.0615585	0.0167141
575	153.128	142.197	145.768	143.975	154.545	157.957	0.0615398	0.0746507	0.129083	0.0940409	0.17125	0.162866	0.115572	0.0187767				160.121	148.575	133.385	143.599	137.973	132.207	0.109986	0.0315318	0.0301053	0.114264	0.0942625	0.0287471	0.0681494	0.0172235
576	152.213	141.328	144.443	143.64	156.274	158.118	0.0551967	0.0680833	0.11882	0.0914953	0.184354	0.164051	0.113667	0.0212524				160.747	146.874	134.601	143.268	139.901	132.835	0.114325	0.0197221	0.0394963	0.111695	0.109553	0.0336338	0.0714043	0.0182909
577	151.47	141.312	148.13	143.165	155.334	159.778	0.0500459	0.0679623	0.147379	0.0878858	0.17723	0.176272	0.117796	0.0229456				161.808	147.122	133.897	143.318	136.385	132.216	0.12168	0.0214439	0.0340594	0.112083	0.081668	0.0288172	0.0666253	0.0181247
578	152.175	140.617	148.9	141.399	157.336	160.187	0.0549332	0.0627099	0.153343	0.0744663	0.192402	0.179283	0.119523	0.0254664				156.864	145.663	133.538	142.886	135.936	134.092	0.0874077	0.0113143	0.0312869	0.108731	0.078107	0.043415	0.0600437	0.0151916
579	151.83	140.351	152.929	136.813	155.792	155.799	0.0525416	0.0606996	0.184551	0.0396181	0.180701	0.146979	0.110848	0.02745				158.156	145.707	132.111	142.927	137.199	131.159	0.096364	0.0116198	0.0202665	0.109049	0.0881239	0.0205923	0.0576693	0.0182199
580	152.064	139.757	152.446	133.328	156.151	157.478	0.0541638	0.0562105	0.18081	0.0131362	0.183421	0.159339	0.107847	0.0306621				160.085	145.032	131.879	143.281	141.184	126.194	0.109736	0.00693337	0.0184748	0.111796	0.119729	-0.018042	0.0581046	0.025386
581	153.619	139.191	148.49	133.204	150.844	154.108	0.0649436	0.0519329	0.150167	0.0121939	0.143201	0.13453	0.0928281	0.0234635				162.588	143.836	131.754	145.007	137.398	127.174	0.127087	-0.00137026	0.0175095	0.125189	0.0897021	-0.0104163	0.0579503	0.0259085
582	155.9	139.068	150.815	134.686	140.686	150.287	0.0807563	0.0510034	0.168176	0.0234554	0.0662169	0.1064	0.082668	0.020541				163.119	147.814	132.989	145.333	136.9	128.683	0.130768	0.0262483	0.0270471	0.127719	0.0857525	0.00132571	0.0664768	0.022857
583	155.954	139.022	149.732	134.353	144.314	152.024	0.0811307	0.0506557	0.159788	0.020925	0.0937124	0.119187	0.0875665	0.0200819				158.443	147.881	133.894	144.764	140.898	127.366	0.0983536	0.0267135	0.0340362	0.123304	0.117461	-0.00892231	0.0651575	0.0224743
584	155.667	138.671	148.667	136.818	151.403	154.671	0.0791411	0.048003	0.151538	0.0396561	0.147438	0.138674	0.100742	0.0209596				157.297	148.637	134.72	144.701	138.498	127.875	0.0904093	0.0319623	0.0404153	0.122815	0.0984262	-0.00496161	0.0631777	0.0197282
585	154.652	138.917	150.369	137.371	153.167	161.234	0.0721047	0.0498622	0.164722	0.0438582	0.160807	0.186991	0.113057	0.0263784				159.01	149.507	136.485	144.091	137.637	129.751	0.102284	0.0380026	0.054046	0.118081	0.0915976	0.00963617	0.0689413	0.0170646
586	153.8	142.979	153.201	137.503	157.977	154.37	0.0661983	0.0805606	0.186658	0.0448613	0.19726	0.136458	0.118666	0.0263113				159.168	148.854	137.965	143.732	139.113	133.708	0.103379	0.0334689	0.0654758	0.115296	0.103304	0.0404269	0.0768917	0.0143986
587	153.587	143.459	153.523	139.808	160.179	157.368	0.0647218	0.0841882	0.189152	0.0623766	0.213948	0.158529	0.128819	0.0272548				156.517	148.255	138.946	143.058	137.754	134.842	0.0850022	0.0293101	0.0730518	0.110066	0.0925256	0.049251	0.0732011	0.0120717
588	152.461	143.591	152.911	140.113	158.541	162.006	0.0569159	0.0851858	0.184411	0.0646942	0.201535	0.192674	0.130903	0.0280567				162.587	148.524	140.432	142.72	141.733	138.822	0.12708	0.0311778	0.0845279	0.107443	0.124083	0.0802207	0.0924221	0.014596
589	152.808	143.248	151.211	139.312	162.397	161.677	0.0593214	0.0825936	0.171244	0.0586075	0.230758	0.190252	0.132129	0.030439				164.16	148.6	142.832	142.086	140.546	140.194	0.137985	0.0317054	0.103063	0.102523	0.114669	0.0908967	0.096807	0.0145598
590	154.618	142.626	151.102	139.188	162.305	169.592	0.071869	0.0778929	0.170399	0.0576653	0.230061	0.248522	0.142735	0.0346628				159.683	148.458	141.435	141.8	137.764	139.678	0.106949	0.0307195	0.0922739	0.100304	0.0926049	0.0868815	0.0849556	0.01122
591	154.802	144.412	150.758	140.715	156.595	168.284	0.0731446	0.0913905	0.167735	0.0692687	0.186786	0.238892	0.13787	0.0286042				161.279	148.137	141.845	141.225	134.539	141.329	0.118013	0.0284909	0.0954402	0.0958425	0.0670274	0.0997285	0.0840904	0.0129675
592	153.364	142.915	149.6	138.76	150.639	163.153	0.0631758	0.080077	0.158765	0.054413	0.141648	0.201118	0.116533	0.0242239				161.922	147.604	143.482	140.441	133.395	144.274	0.122471	0.0247903	0.108082	0.089759	0.0579544	0.122645	0.0876169	0.0160127
593	153.09	143.458	150.606	139.555	151.546	166.417	0.0612764	0.0841807	0.166557	0.060454	0.148522	0.225147	0.124356	0.0272032				163.228	147.756	140.931	140.124	131.993	144.038	0.131524	0.0258457	0.0883816	0.0872992	0.0468351	0.120808	0.083449	0.016738
594	154.122	141.744	147.707	139.877	150.081	162.206	0.0684306	0.0712272	0.144102	0.0629009	0.137419	0.194146	0.113038	0.0219011				163.683	147.119	141.927	139.512	130.753	140.158	0.134678	0.0214231	0.0960735	0.0825504	0.0370007	0.0906165	0.0770571	0.0169268
595	154.176	142.483	147.672	139.074	152.457	164.268	0.0688049	0.0768121	0.143831	0.056799	0.155426	0.209327	0.1185	0.0246774				164.666	147.574	142.317	139.097	131.21	136.408	0.141492	0.0245821	0.0990854	0.0793302	0.0406252	0.0614365	0.0744253	0.0172488
596	154.241	142.079	147.475	139.364	149.417	160.548	0.0692555	0.0737589	0.142305	0.0590027	0.132387	0.18194	0.109775	0.0202437				170.177	147.045	143.181	138.823	132.202	141.058	0.179696	0.0209093	0.105758	0.0772041	0.0484927	0.0976197	0.0882799	0.0223562
597	154.418	142.003	145.949	139.665	148.889	165.669	0.0704826	0.0731846	0.130485	0.0612899	0.128385	0.219641	0.113911	0.024479				166.303	146.328	144.226	138.264	131.059	144.734	0.15284	0.0159313	0.113828	0.0728665	0.0394276	0.126224	0.086853	0.0216847
598	155.247	140.946	145.813	140.292	148.319	163.925	0.0762295	0.0651963	0.129432	0.0660544	0.124065	0.206802	0.111296	0.0223718				162.008	146.933	145.699	138.116	130.294	144.244	0.123067	0.0201317	0.125204	0.0717181	0.0333604	0.122411	0.0826486	0.0195643
599	155.747	140.033	144.537	142.07	148.044	162.035	0.0796957	0.0582963	0.119548	0.0795651	0.121981	0.192888	0.108662	0.0196742				158.439	146.508	145.646	137.837	130.381	140.173	0.0983258	0.017181	0.124795	0.0695531	0.0340504	0.0907333	0.0724397	0.0166146
600	155.43	139.421	143.597	142.826	146.906	162.332	0.0774981	0.0536711	0.112267	0.0853098	0.113356	0.195074	0.106196	0.0200051				157.289	146.78	146.759	137.61	129.386	136.355	0.0903538	0.0190694	0.13339	0.0677917	0.026159	0.0610241	0.066298	0.017274
601	154.869	139.441	143.422	143.779	142.836	160.864	0.073609	0.0538223	0.110912	0.0925515	0.0825111	0.184267	0.0996121	0.0186273				158.869	146.758	146.525	136.993	131.909	129.628	0.101307	0.0189167	0.131583	0.0630041	0.0461689	0.00867907	0.0616097	0.0194395
602	154.838	139.813	142.03	142.908	144.67	157.475	0.0733941	0.0566337	0.10013	0.0859329	0.0964104	0.159317	0.095303	0.014359				157.142	147.337	146.888	136.828	132.171	129.473	0.0893348	0.0229366	0.134386	0.0617238	0.0482469	0.00747296	0.0606835	0.0188547
603	155.071	139.054	141.674	143.702	151.612	155.031	0.0750094	0.0508975	0.0973723	0.0919664	0.149022	0.141325	0.100932	0.0155056				157.652	147.606	146.441	136.403	131.672	125.644	0.0928702	0.0248042	0.130934	0.0584259	0.0442893	-0.0223218	0.0548337	0.0217692
604	154.903	138.708	141.152	144.257	156.377	154.212	0.0738447	0.0482827	0.093329	0.0961837	0.185134	0.135295	0.105345	0.0197822				164.96	147.463	147.689	136.258	131.181	125.994	0.143531	0.0238114	0.140572	0.0573008	0.0403952	-0.0195983	0.0643353	0.0267043
605	154.614	139.227	140.175	144.226	157.185	151.999	0.0718413	0.052205	0.0857614	0.0959482	0.191258	0.119003	0.10267	0.0199523				161.811	149.394	146.51	135.946	130.069	124.817	0.121701	0.037218	0.131467	0.0548798	0.0315759	-0.0287569	0.0580142	0.0245777
606	153.819	139.18	140.145	147.385	155.412	150.658	0.0663301	0.0518498	0.0855291	0.119953	0.177821	0.109131	0.101769	0.0184213				157.966	151.349	147.495	135.61	130.892	123.56	0.0950469	0.0507913	0.139074	0.0522726	0.0381031	-0.0385381	0.056125	0.0243068
607	153.399	139.963	139.748	147.651	152.338	153.784	0.0634185	0.0577673	0.082454	0.121974	0.154524	0.132144	0.102047	0.0162209				161.87	152.27	147.458	135.44	131.761	122.589	0.12211	0.0571856	0.138788	0.0509535	0.0449951	-0.0460938	0.0613231	0.0268487
608	154.223	139.858	142.333	145.329	152.648	161.029	0.0691307	0.0569738	0.102477	0.10433	0.156873	0.185481	0.112544	0.0203524				161.64	151.628	147.678	135.326	133.17	123.045	0.120516	0.0527283	0.140487	0.0500689	0.0561699	-0.0425455	0.0629041	0.0263132
609	155.474	140.297	143.914	142.443	154.472	165.275	0.0778031	0.0602915	0.114723	0.0823995	0.170697	0.21674	0.120442	0.0249766				161.709	150.244	147.226	135.612	132.174	123.458	0.120994	0.0431194	0.136997	0.0522881	0.0482706	-0.0393318	0.0603895	0.0258177
610	155.469	142.158	144.336	142.764	153.563	169.801	0.0777685	0.074356	0.117992	0.0848387	0.163808	0.25006	0.128137	0.0280147				162.952	149.67	147.597	135.076	131.709	122.896	0.129611	0.0391342	0.139862	0.048129	0.0445827	-0.0437049	0.0596023	0.0275628
611	154.981	142.948	146.179	143.088	154.065	180.751	0.0743855	0.0803264	0.132267	0.0873007	0.167612	0.330673	0.145427	0.0398519				161.469	147.977	148.952	133.85	131.218	123.589	0.11933	0.02738	0.150326	0.0386158	0.0406886	-0.0383124	0.0563381	0.0277837
612	155.494	145.307	148.771	142.621	150.328	177.884	0.0779418	0.0981545	0.152344	0.083752	0.139291	0.309566	0.143508	0.0354015				161.046	147.515	149.086	134.454	130.957	126.627	0.116398	0.0241724	0.151361	0.0433026	0.0386186	-0.0146727	0.0598633	0.0252475
613	155.377	147.919	148.554	142.258	154.071	180.34	0.0771307	0.117895	0.150663	0.0809937	0.167658	0.327647	0.153665	0.0378122				160.813	147.329	148.358	134.143	131.652	128.448	0.114783	0.0228811	0.145739	0.0408894	0.0441307	-0.000502908	0.06132	0.0230921
614	153.862	148.458	148.609	140.635	162.779	168.167	0.0666282	0.121968	0.151089	0.0686608	0.233653	0.238031	0.146672	0.0311099				159.853	146.897	145.714	135.359	133.721	123.725	0.108128	0.0198818	0.12532	0.050325	0.0605399	-0.0372542	0.05449	0.0241954
615	153.674	148.686	149.874	141.394	165.377	168.543	0.0653249	0.123691	0.160888	0.0744283	0.253343	0.240799	0.153079	0.0329438				157.327	147.058	145.209	133.475	133.937	122.286	0.0906173	0.0209996	0.12142	0.035706	0.062253	-0.0484515	0.0470907	0.0242129
616	152.862	147.661	149.889	141.663	154.383	163.201	0.0596958	0.115945	0.161004	0.0764724	0.170022	0.201472	0.130768	0.0228569				154.488	148.521	148.841	135.443	135.516	124.674	0.0709368	0.0311569	0.149469	0.0509768	0.074776	-0.0298697	0.0579076	0.0240182
617	152.12	147.096	149.576	143.854	149.136	160.663	0.054552	0.111675	0.158579	0.0931214	0.130257	0.182787	0.121829	0.0187891				150.008	149.726	149.081	135.646	134.355	126.405	0.0398807	0.039523	0.151322	0.052552	0.0655681	-0.0164002	0.0554077	0.0223314
618	151.312	146.627	149.647	144.65	142.75	168.269	0.0489506	0.10813	0.159129	0.0991701	0.0818593	0.238782	0.12267	0.0274924				144.642	149.443	148.899	136.416	134.914	128.149	0.0026827	0.0375582	0.149917	0.0585268	0.0700016	-0.00282953	0.0526428	0.0228027
619	152.056	145.949	150.568	143.476	139.438	177.616	0.0541083	0.103006	0.166263	0.090249	0.0567587	0.307594	0.129663	0.0392795				146.378	149.878	151.269	136.488	135.896	129.972	0.0147169	0.0405784	0.16822	0.0590855	0.0777898	0.0113558	0.0619577	0.0236642
620	152.372	145.141	149.753	141.343	139.068	177.325	0.0562989	0.0968999	0.15995	0.0740407	0.0539546	0.305451	0.124433	0.0395542				146.846	150.644	150.216	137.862	134.755	131.246	0.0179612	0.0458966	0.160088	0.0697471	0.0687405	0.0212693	0.0639504	0.0212615
621	151.19	144.706	148.132	140.095	138.734	180.06	0.0481049	0.0936124	0.147394	0.0645574	0.0514233	0.325586	0.12178	0.0434507				147.636	148.988	151.662	138.608	134.306	130.308	0.0234376	0.0343992	0.171255	0.0755358	0.0651795	0.0139704	0.0639629	0.0235673
622	150.644	143.941	148.344	137.781	139.529	172.798	0.0443198	0.0878309	0.149037	0.0469737	0.0574483	0.272124	0.109622	0.0362153				149.072	149.707	151.178	139.682	135.325	130.216	0.0333922	0.0393911	0.167517	0.0838695	0.0732612	0.0132545	0.0684476	0.0225057
623	148.839	144.031	151.03	139.7	141.562	178.091	0.0318069	0.0885111	0.169842	0.0615559	0.0728558	0.31109	0.12261	0.0421769				147.605	148.957	151.122	138.993	137.423	128.292	0.0232227	0.034184	0.167085	0.0785232	0.0899004	-0.0017168	0.0651997	0.0247454
624	147.896	143.559	145.478	140.082	143.743	169.086	0.0252696	0.084944	0.126837	0.0644586	0.089385	0.244796	0.105948	0.0309091				146.74	147.959	152.278	140.016	140.389	129.835	0.0172264	0.0272551	0.176012	0.0864612	0.113424	0.0102898	0.0717781	0.026804
625	147.433	143.164	146.022	140.978	146.645	173.43	0.02206	0.0819588	0.131051	0.0712672	0.111378	0.276777	0.115749	0.0356282				148.348	147.766	151.451	139.246	140.211	129.393	0.0283733	0.0259151	0.169625	0.0804863	0.112012	0.00685046	0.0705438	0.0254706
626	147.471	142.677	145.571	142.535	145.649	167.075	0.0223234	0.0782783	0.127558	0.0830985	0.10383	0.229992	0.107513	0.0283575				146.166	146.625	149.7	144.12	138.93	130.643	0.0132473	0.0179933	0.156103	0.118306	0.101852	0.0165771	0.0706799	0.0255203
627	146.907	142.782	144.831	141.193	140.915	168.423	0.0184135	0.0790718	0.121826	0.0729009	0.0679524	0.239915	0.100013	0.0310421				146.784	146.869	145.952	143.379	137.756	130.806	0.0175314	0.0196874	0.127158	0.112557	0.0925414	0.0178455	0.0645533	0.0211444
628	146.322	143.784	146.605	141.42	142.165	164.057	0.0143581	0.0866444	0.135567	0.0746259	0.0774258	0.207773	0.099399	0.0267982				144.787	145.799	148.295	143.195	138.542	127.744	0.00368787	0.0122585	0.145252	0.111129	0.0987752	-0.00598097	0.0608536	0.0265738
629	146.009	144.199	144.726	144.169	141.58	160.411	0.0121883	0.0897808	0.121012	0.095515	0.0729922	0.180932	0.0954034	0.0226786				146.339	147.122	149.457	144.058	138.118	123.529	0.0144466	0.0214439	0.154226	0.117825	0.0954125	-0.0387793	0.0607625	0.0298842
630	145.825	144.401	144.45	146.322	138.556	153.391	0.0109127	0.0913074	0.118875	0.111875	0.0500743	0.129251	0.0853826	0.0187755				146.472	146.634	147.534	143.159	140.972	125.301	0.0153686	0.0180558	0.139375	0.110849	0.118047	-0.0249908	0.0627843	0.0277992
631	145.681	144.769	144.15	144.767	139.548	155.358	0.00991444	0.0940885	0.116551	0.100059	0.0575923	0.143732	0.0869895	0.0192523				144.249	147.873	145.202	143.006	143.688	125.455	-4.16392e-05	0.026658	0.121366	0.109662	0.139588	-0.0237924	0.06224	0.0284453
632	144.926	146.312	146.199	147.342	138.419	157.781	0.0046805	0.10575	0.132422	0.119626	0.049036	0.16157	0.095514	0.0236803				145.035	148.499	145.702	142.266	139.244	123.218	0.00540705	0.0310042	0.125227	0.10392	0.104343	-0.0411993	0.0547837	0.0271103
633	144.869	146.985	150.335	147.912	139.591	152.667	0.00428536	0.110836	0.164458	0.123957	0.0579182	0.123921	0.0975627	0.0233202				143.506	150.2	144.734	140.261	137.586	125.421	-0.00519224	0.0428139	0.117751	0.0883623	0.0911932	-0.024057	0.0518119	0.0233248
634	144.69	146.632	150.549	146.961	141.2	156.326	0.00304447	0.108168	0.166116	0.116731	0.0701123	0.150858	0.102505	0.024194				143.898	149.861	143.794	142.477	134.947	123.343	-0.00247483	0.0404603	0.110492	0.105557	0.0702633	-0.0402266	0.0473453	0.0245626
635	144.193	145.877	150.73	145.844	141.982	155.23	-0.000400922	0.102462	0.167518	0.108243	0.0760389	0.14279	0.0994418	0.023886				143.948	150.954	143.26	138.719	136.76	126.469	-0.00212822	0.0480488	0.106368	0.0763971	0.0846422	-0.0159022	0.0495709	0.0201142
636	143.951	145.832	149.651	142.712	138.559	157.952	-0.00207856	0.102122	0.15916	0.0844435	0.050097	0.162829	0.0927622	0.0260064				144.187	152.767	146.277	138.031	136.4	127.175	-0.000471434	0.0606362	0.129668	0.0710585	0.081787	-0.0104085	0.0553782	0.0215538
637	143.987	145.677	146.814	143.168	139.355	157.183	-0.00182899	0.100951	0.137186	0.0879086	0.0561296	0.157168	0.0895855	0.0234101				142.4	154.731	146.322	137.521	137.993	127.833	-0.0128592	0.0742719	0.130015	0.0671011	0.0944211	-0.00528843	0.0579436	0.0230121
638	143.539	145.29	146.165	142.777	139.599	152.329	-0.00493469	0.098026	0.132159	0.0849375	0.0579788	0.121433	0.0815998	0.0203879				140.443	156.835	146.063	136.223	138.553	128.98	-0.0264255	0.0888797	0.128015	0.0570292	0.0988624	0.00363676	0.0583329	0.0242272
639	145.292	144.798	145.673	142.3	137.99	152.318	0.00721775	0.0943077	0.128348	0.0813128	0.0457847	0.121352	0.0797204	0.0189045				144.303	155.71	143.918	136.451	138.302	129.663	0.000332698	0.081069	0.11145	0.0587984	0.0968718	0.00895142	0.0595788	0.0188122
640	145.581	143.597	146.031	141.068	140.148	153.61	0.00922121	0.0852312	0.131121	0.0719511	0.0621395	0.130863	0.0817545	0.0187996				145.471	155.328	143.553	134.335	137.846	127.717	0.00842947	0.0784168	0.108631	0.0423792	0.0932552	-0.00619106	0.0541534	0.0191104
641	146.613	143.189	147.232	140.198	138.006	151.848	0.0163754	0.0821477	0.140423	0.0653401	0.045906	0.117892	0.078014	0.0187021				148.247	155.055	141.267	133.352	137.796	129.537	0.0276732	0.0765214	0.0909764	0.0347516	0.0928587	0.00797097	0.0551254	0.0147864
642	147.114	141.081	147.338	138.623	136.193	163.666	0.0198485	0.0662166	0.141244	0.0533719	0.0321658	0.204895	0.0862903	0.0293925				157.358	154.23	139.436	134.056	137.522	127.925	0.0908322	0.0707936	0.076836	0.0402143	0.0906856	-0.00457255	0.0607982	0.0151101
643	147.209	139.565	148.592	137.501	136.937	156.707	0.0205071	0.0547594	0.150957	0.0448461	0.0378043	0.153663	0.0770896	0.0242234				153.828	153.731	137.811	133.923	137.174	128.265	0.0663616	0.0673291	0.0642864	0.0391823	0.0879256	-0.00192689	0.0538597	0.0128251
644	146.593	140.523	147.434	137.577	138.224	164.427	0.0162368	0.0619995	0.141988	0.0454236	0.0475581	0.210497	0.0872838	0.0301062				148.447	153.115	138.079	134.389	135.909	127.273	0.0290596	0.0630523	0.0663562	0.0427982	0.0778929	-0.00964598	0.0449189	0.0130499
645	146.547	140.401	147.564	136.492	137.782	176.129	0.0159179	0.0610775	0.142995	0.0371788	0.0442083	0.296646	0.0996706	0.0432673				148.641	153.75	138.745	133.041	135.996	126.717	0.0304044	0.067461	0.0714995	0.0323383	0.0785829	-0.0139724	0.0443856	0.0143566
646	146.928	140.664	146.515	135.84	139.458	172.96	0.0185591	0.0630651	0.13487	0.0322244	0.0569102	0.273316	0.0964908	0.038999				148.551	154.949	137.911	133.095	133.378	129.638	0.0297805	0.0757855	0.0650587	0.0327574	0.0578196	0.00875688	0.0449931	0.0103433
647	146.564	140.263	145.622	135.041	144.503	175.993	0.0160357	0.0600345	0.127953	0.026153	0.0951448	0.295645	0.103494	0.042075				149.367	155.031	137.04	132.411	131.127	131.101	0.0354372	0.0763548	0.0583322	0.0274498	0.0399669	0.020141	0.042947	0.00852123
648	147.137	140.242	145.532	134.515	144.376	180.319	0.020008	0.0598758	0.127255	0.022156	0.0941823	0.327493	0.108495	0.0469628				150.887	153.56	136.743	131.517	130.501	132.947	0.0459741	0.0661419	0.0560385	0.0205128	0.0350021	0.0345053	0.0430291	0.00672356
649	147.297	140.434	145.989	134.632	148.627	172.391	0.0211172	0.0613269	0.130795	0.023045	0.126399	0.269128	0.105302	0.0381754				149.997	153.575	137.051	131.086	133.705	134.48	0.0398045	0.066246	0.0584171	0.0171684	0.060413	0.0464341	0.0480805	0.00733867
650	148.748	140.014	146.407	134.473	151.471	170.652	0.031176	0.0581527	0.134033	0.0218368	0.147953	0.256325	0.108246	0.0365535				149.787	153.314	137.496	128.902	133.86	133.203	0.0383487	0.0644339	0.0618538	0.000221561	0.0616423	0.0364973	0.0438329	0.0100866
651	148.937	139.516	145.342	134.445	153.708	158.368	0.0324862	0.0543891	0.125784	0.0216241	0.164907	0.165891	0.0941802	0.0269551				148.373	153.226	137.64	129.068	135.301	135.073	0.0285466	0.063823	0.0629658	0.00150965	0.0730709	0.0510484	0.0468274	0.0110208
652	150.079	138.973	144.794	134.096	152.903	150.095	0.040403	0.0502854	0.121539	0.0189721	0.158806	0.104986	0.0824986	0.0221344				149.012	151.929	136.367	131.767	132.326	137.329	0.0329763	0.0548181	0.0531347	0.0224527	0.0494762	0.0686031	0.0469102	0.00675962
653	150.01	138.991	143.868	133.834	147.87	155.651	0.0399247	0.0504214	0.114367	0.0169812	0.120662	0.145889	0.0813742	0.0213048				152.543	150.766	133.781	133.479	129.673	137.423	0.0574538	0.0467436	0.0331636	0.035737	0.0284352	0.0693346	0.0451446	0.00645621
654	150.802	139.378	142.816	133.32	144.278	159.342	0.0454151	0.0533462	0.106218	0.0130754	0.0934396	0.173062	0.0807594	0.0230293				148.614	148.599	135.99	133.305	128.751	138.775	0.0302173	0.0316985	0.0502232	0.0343869	0.0211229	0.079855	0.0412506	0.0086333
655	150.542	139.202	144.856	133.226	142.903	155.468	0.0436127	0.0520161	0.122019	0.0123611	0.0830189	0.144542	0.0762616	0.020444				149.065	147.168	136.342	132.754	128.788	134.16	0.0333437	0.0217633	0.0529417	0.0301113	0.0214163	0.0439441	0.0339201	0.00510318
656	151.088	138.777	145.137	132.949	141.774	156.465	0.0473978	0.0488041	0.124196	0.0102562	0.0744625	0.151882	0.0761664	0.0215739				151.519	146.506	136.405	133.344	128.556	133.049	0.0503552	0.0171671	0.0534282	0.0346895	0.0195763	0.035299	0.0350859	0.00614118
657	154.093	138.894	145.977	132.922	141.97	148.818	0.0682295	0.0496884	0.130702	0.010051	0.0759479	0.0955851	0.0717007	0.0167003				153.442	145.821	136.407	133.342	128.445	129.144	0.0636858	0.0124113	0.0534436	0.034674	0.018696	0.0049129	0.0313039	0.00959598
658	154.335	140.141	146.92	132.733	140.854	151.477	0.0699072	0.0591125	0.138007	0.00861486	0.0674901	0.11516	0.0763819	0.0185409				154.814	145.964	135.758	133.841	127.421	131.282	0.0731967	0.0134041	0.0484315	0.038546	0.0105747	0.0215494	0.0342837	0.00981969
659	154.799	139.082	147.109	132.239	141.648	152.692	0.0731238	0.0511092	0.139471	0.00486104	0.0735076	0.124105	0.0776962	0.0200168				153.376	144.514	135.446	133.492	127.457	133.878	0.0632283	0.00333698	0.046022	0.0358379	0.0108602	0.0417497	0.0335058	0.00919504
660	155.19	139.368	146.074	131.998	141.688	149.434	0.0758343	0.0532706	0.131454	0.00302973	0.0738107	0.10012	0.0729199	0.0177445				154.666	144.254	135.329	133.281	127.361	141.36	0.0721708	0.00153184	0.0451185	0.0342006	0.0100988	0.0999697	0.0438484	0.0152492
661	154.753	139.235	146.415	131.77	141.135	155.621	0.0728049	0.0522655	0.134095	0.0012972	0.0696197	0.145668	0.0792917	0.0218773				154.207	144.564	135.105	133.305	127.246	134.715	0.0689889	0.00368412	0.0433886	0.0343869	0.00918673	0.0482627	0.0346496	0.0100799
662	154.729	139.102	147.152	131.523	140.634	151.816	0.0726385	0.0512603	0.139804	-0.000579714	0.0658228	0.117656	0.0744336	0.0203165				155.777	143.508	135.954	132.878	126.652	133.275	0.0798724	-0.00364751	0.0499452	0.0310735	0.00447572	0.0370576	0.0331295	0.0124645
663	154.192	139.661	146.533	131.067	140.123	151.743	0.0689158	0.0554849	0.135009	-0.00404478	0.0619501	0.117119	0.0724056	0.0201419				157.44	143.806	136.456	132.591	128.46	140.513	0.0914006	-0.00157855	0.0538221	0.0288465	0.018815	0.0933789	0.0474474	0.0159704
664	153.872	142.352	146.295	131.509	138.928	152.412	0.0666975	0.0758221	0.133165	-0.000686098	0.0528935	0.122044	0.0749894	0.0199023				154.67	143.121	141.898	132.407	129.61	142.848	0.0721985	-0.00633439	0.0958495	0.0274188	0.0279356	0.111548	0.0547694	0.0186342
665	153.781	141.699	145.738	131.869	139.184	150.716	0.0660666	0.0708871	0.128851	0.00204948	0.0548337	0.109558	0.072041	0.0181355				154.903	143.821	139.13	132.076	131.496	140.327	0.0738137	-0.0014744	0.0744728	0.0248504	0.0428934	0.0919316	0.0510812	0.0144336
666	154.351	141.932	145.731	133.693	139.36	146.392	0.0700181	0.072648	0.128797	0.0159097	0.0561675	0.0777251	0.0702109	0.0148779				155.607	142.971	138.389	131.468	131.814	137.317	0.0786939	-0.00737581	0.0687502	0.0201326	0.0454155	0.0685098	0.0456877	0.013676
667	154.533	142.405	145.385	134.073	138.899	144.135	0.0712798	0.0762227	0.126117	0.0187973	0.0526738	0.0611093	0.0676999	0.0143279				155.291	143.232	138.669	131.485	132.845	138.363	0.0765034	-0.00556373	0.0709126	0.0202645	0.0535923	0.076649	0.0487263	0.0139339
668	154.023	141.875	145.254	135.043	140.57	141.014	0.0677443	0.0722172	0.125102	0.0261682	0.0653378	0.0381328	0.0657837	0.0140215				155.025	143.445	138.158	131.35	132.306	136.527	0.0746594	-0.00408491	0.0669663	0.0192169	0.0493175	0.0623625	0.0447396	0.012591
669	153.688	144.01	144.621	135.093	140.719	142.072	0.0654219	0.0883524	0.120199	0.0265481	0.066467	0.0459217	0.0688184	0.0133537				154.487	142.332	137.766	130.708	132.411	135.611	0.0709299	-0.0118123	0.0639389	0.0142353	0.0501503	0.0552348	0.0404462	0.0131808
670	153.99	144.093	143.946	136.036	138.122	141.154	0.0675155	0.0889797	0.114971	0.0337138	0.0467851	0.0391634	0.065188	0.0129825				151.668	142.071	138.233	130.568	131.501	140.025	0.0513881	-0.0136244	0.0675455	0.013149	0.0429331	0.0895816	0.0418288	0.0152007
671	154.756	143.709	143.865	135.96	138.194	140.832	0.0728257	0.0860776	0.114343	0.0331363	0.0473308	0.0367929	0.0650844	0.0129915				151.208	141.866	136.989	130.352	132.228	135.377	0.0481993	-0.0150476	0.0579383	0.0114729	0.0486989	0.053414	0.0341126	0.0119453
672	155.316	144.429	146.463	135.671	138.851	140.981	0.0767078	0.091519	0.134467	0.0309402	0.05231	0.0378898	0.0706389	0.0158443				150.832	142.36	136.337	130.038	132.521	129.577	0.0455928	-0.0116179	0.052903	0.00903641	0.0510227	0.00828222	0.0258699	0.011181
673	156.62	143.729	146.189	135.191	138.28	142.475	0.0857476	0.0862288	0.132344	0.0272928	0.0479825	0.0488885	0.0714141	0.0154279				149.157	141.216	136.519	129.712	130.834	132.205	0.0339814	-0.0195605	0.0543086	0.0065068	0.0376431	0.0287316	0.0236018	0.0106916
674	158.442	143.053	145.961	135.098	136.565	140.622	0.0983784	0.0811199	0.130578	0.0265861	0.0349851	0.0352469	0.0678158	0.0172131				148.764	141.004	135.417	129.69	131.383	139.429	0.0312571	-0.0210324	0.0457981	0.00633609	0.0419972	0.0849439	0.03155	0.0147917
675	157.986	144.029	146.368	134.305	135.765	141.31	0.0952172	0.088496	0.133731	0.0205602	0.0289221	0.0403119	0.0678731	0.0182807				147.763	141.226	135.255	129.305	131.397	138.866	0.024318	-0.0194911	0.044547	0.00334866	0.0421083	0.0805631	0.0292323	0.0142633
676	158.076	147.328	145.579	134.143	137.487	142.945	0.0958412	0.113428	0.127619	0.0193292	0.0419726	0.0523486	0.0750899	0.0176852				147.167	141.448	134.501	129.438	129.916	137.167	0.0201864	-0.0179498	0.038724	0.00438068	0.0303625	0.0673426	0.0238411	0.0119652
677	157.425	147.461	145.591	134.088	137.775	144.091	0.0913282	0.114433	0.127712	0.0189113	0.0441553	0.0607854	0.076221	0.017215				147.69	141.708	134.198	129.043	130.3	140.855	0.023812	-0.0161446	0.036384	0.00131566	0.033408	0.0960401	0.0291358	0.0157052
678	155.765	146.479	144.262	133.306	136.544	142.589	0.0798205	0.107012	0.117418	0.012969	0.0348259	0.0497278	0.0669622	0.016892				148.201	145.79	135.781	129.196	130.871	140.422	0.0273543	0.012196	0.0486092	0.00250287	0.0379366	0.0926708	0.0368783	0.0130807
679	154.607	146.145	143.836	135.033	139.866	138.889	0.0717928	0.104488	0.114119	0.0260922	0.0600024	0.0224887	0.066497	0.0156531				148.439	145.311	136.23	129.067	129.631	144.978	0.0290041	0.00887042	0.0520767	0.00150189	0.0281021	0.128123	0.0412796	0.0188107
680	153.446	144.839	142.103	135.73	140.436	138.533	0.0637443	0.0946176	0.100695	0.0313885	0.0643222	0.0198679	0.0624393	0.0132674				149.216	146.623	137.384	129.125	130.414	142.774	0.0343904	0.0179794	0.0609888	0.00195194	0.0343121	0.110973	0.0434325	0.0157091
681	154.838	144.957	141.555	136.694	140.844	139.328	0.0733941	0.0955093	0.0964506	0.0387138	0.0674143	0.0257206	0.0662005	0.0118623				148.209	147.716	137.241	128.612	130.721	145.5	0.0274097	0.0255679	0.0598845	-0.00202871	0.0367469	0.132184	0.0466275	0.0189505
682	155.306	143.946	142.475	136.172	141.677	138.67	0.0766385	0.0878687	0.103577	0.0347472	0.0737274	0.0208764	0.0662392	0.0130073				147.619	148.604	137.336	128.882	129.415	145.65	0.0233198	0.0317332	0.0606181	6.637e-05	0.026389	0.133352	0.045913	0.0191975
683	153.23	144.716	143.692	135.392	135.524	139.181	0.0622469	0.093688	0.113003	0.0288201	0.0270956	0.0246384	0.0582487	0.0155308				148.098	149.728	137.022	127.864	130.178	141.774	0.0266403	0.0395369	0.0581932	-0.00783285	0.0324404	0.103191	0.0420282	0.0150812
684	153.001	143.998	144.232	135.185	134.387	139.875	0.0606594	0.0882617	0.117186	0.0272472	0.0184787	0.0297476	0.0569301	0.0160466				147.853	149.55	136.822	131.226	129.15	142.182	0.0249419	0.0383011	0.0566486	0.0182548	0.0242873	0.106366	0.0447999	0.0135311
685	156.889	144.51	145.287	134.967	134.47	140.98	0.0876124	0.0921311	0.125358	0.0255906	0.0191077	0.0378825	0.0646137	0.0175918				147.856	148.26	136.779	132.533	127.986	139.874	0.0249627	0.0293448	0.0563165	0.0283965	0.0150557	0.0884066	0.0404138	0.0111129
686	157.687	144.152	144.369	137.633	135.507	140.195	0.0931445	0.0894256	0.118247	0.0458491	0.0269668	0.0321034	0.0676227	0.0153603				147.348	149.096	136.352	133.335	128.567	133.758	0.0214412	0.0351491	0.0530189	0.0346196	0.0196636	0.040816	0.034118	0.00507627
687	156.446	144.411	146.941	138.905	137.209	138.375	0.0845414	0.091383	0.138169	0.0555148	0.0398658	0.0187047	0.0713631	0.0173721				147.112	147.534	136.366	134.66	128.836	128.813	0.0198052	0.0243043	0.053127	0.0449011	0.021797	0.00233728	0.027712	0.00751527
688	154.827	145.84	146.495	138.036	143.849	138.404	0.0733179	0.102183	0.134715	0.0489114	0.0901883	0.0189182	0.0780388	0.0166419				147.644	147.126	136.5	134.374	130.753	136.84	0.0234931	0.0214717	0.0541619	0.0426818	0.0370007	0.0647981	0.0406012	0.00694094
689	153.269	146.603	147.654	138.442	147.99	136.811	0.0625173	0.107949	0.143692	0.0519966	0.121572	0.00719065	0.0824862	0.0207525				148.028	145.755	136.13	134.227	133.594	136.924	0.026155	0.011953	0.0513044	0.0415412	0.0595327	0.0654517	0.0426563	0.00835755
690	153.584	147.872	144.969	137.528	149.51	135.183	0.064701	0.117539	0.122895	0.0450512	0.133091	-0.00479454	0.0797472	0.0221458				147.957	146.941	136.828	133.699	135.488	136.153	0.0256628	0.0201872	0.0566949	0.0374441	0.0745539	0.0594523	0.0456659	0.00868544
691	153.431	148.181	145.686	136.878	159.951	139.723	0.0636403	0.119875	0.128448	0.040112	0.212221	0.0286285	0.0988207	0.0281614				145.017	145.953	136.935	133.269	134.847	130.081	0.00528227	0.0133277	0.0575213	0.0341075	0.0694702	0.012204	0.0319855	0.0108231
692	152.841	148.725	148.544	136.307	158.979	141.537	0.0595502	0.123986	0.150586	0.0357731	0.204854	0.041983	0.102789	0.0278144				143.763	146.095	137.172	132.697	134.45	133.247	-0.00341067	0.0143136	0.0593516	0.0296691	0.0663216	0.0368397	0.0338475	0.0108031
693	152.348	151.174	147.229	138.289	148.831	146.375	0.0561325	0.142494	0.1404	0.0508339	0.127945	0.0776	0.0992343	0.017377				146.253	145.851	138.248	132.187	133.861	142.049	0.0138504	0.0126196	0.0676613	0.0257117	0.0616502	0.105331	0.047804	0.0150269
694	152.648	152.616	143.748	138.263	161.219	146.803	0.0582123	0.153392	0.113437	0.0506364	0.22183	0.0807509	0.113043	0.0267125				146.334	148.767	138.12	131.801	133.338	141.099	0.0144119	0.0328649	0.0666728	0.0227165	0.0575023	0.0979388	0.0486845	0.0128147
695	152.281	153.181	144.3	137.325	149.459	148.179	0.0556681	0.157662	0.117713	0.0435087	0.132705	0.0908809	0.0996895	0.0182094				148.025	149.534	137.685	131.632	133.118	142.053	0.0261342	0.03819	0.0633134	0.0214051	0.0557575	0.105362	0.0516937	0.0126292
696	151.946	151.169	143.54	138.318	149.488	148.756	0.0533457	0.142456	0.111826	0.0510543	0.132925	0.0951287	0.0977893	0.0159093				146.648	149.368	137.834	131.796	132.527	142.148	0.0165886	0.0370375	0.0644641	0.0226777	0.0510703	0.106101	0.0496566	0.0134013
697	151.581	150.127	146.754	137.748	162.28	150.061	0.0508154	0.134582	0.136721	0.046723	0.229871	0.104736	0.117241	0.0276329				146.971	149.147	137.375	131.456	130.437	143.176	0.0188277	0.0355031	0.0609193	0.0200395	0.0344945	0.114101	0.0473141	0.014725
698	151.14	149.297	146.211	137.725	167.859	151.263	0.0477582	0.128309	0.132515	0.0465482	0.272153	0.113585	0.123478	0.0336446				146.127	148.979	137.942	131.154	130.673	142.669	0.012977	0.0343367	0.0652981	0.0176961	0.0363662	0.110155	0.0461383	0.0148422
699	151.35	148.169	145.56	138.679	173.583	149.856	0.049214	0.119784	0.127472	0.0537975	0.315533	0.103227	0.128171	0.0398176				146.206	148.091	136.895	130.895	131.176	142.045	0.0135246	0.0281715	0.0572124	0.0156863	0.0403555	0.1053	0.043375	0.0140524
700	150.47	147.887	140.79	138.862	170.176	151.468	0.0431136	0.117653	0.0905251	0.0551881	0.289713	0.115094	0.118548	0.0364235				145.386	147.599	137.604	130.924	133.708	141.324	0.00784024	0.0247556	0.0626878	0.0159114	0.0604368	0.0996896	0.0452202	0.0143511
701	149.997	147.345	140.285	138.825	155.103	149.17	0.0398345	0.113557	0.0866135	0.0549069	0.175479	0.0981765	0.0947612	0.0196231				145.072	146.94	138.617	130.365	132.16	132.739	0.00566354	0.0201803	0.070511	0.0115738	0.0481596	0.0328868	0.0314958	0.00999006
702	149.918	147.401	141.481	137.713	159.035	152.35	0.0392869	0.11398	0.0958774	0.046457	0.205278	0.121587	0.103744	0.0246514				143.961	146.365	140.223	132.408	132.973	139.959	-0.0020381	0.0161882	0.0829138	0.0274265	0.0546075	0.0890681	0.0446943	0.0150806
703	150.379	148.105	141.551	136.382	161.261	152.406	0.0424827	0.1193	0.0964196	0.036343	0.222149	0.122	0.106449	0.0276288				145.33	145.776	141.536	133.268	133.116	138.313	0.00745203	0.0120988	0.0930539	0.0340998	0.0557416	0.07626	0.046451	0.0141424
704	150.204	148.688	143.068	136.167	173.354	151.011	0.0412695	0.123706	0.10817	0.0347092	0.313798	0.11173	0.12223	0.041321				143.429	145.295	142.862	134.737	134.217	137.285	-0.00572602	0.00875934	0.103294	0.0454985	0.0644737	0.0682608	0.0474268	0.0165025
705	149.537	150.882	144.497	136.215	155.54	152.889	0.0366457	0.140287	0.119239	0.035074	0.178791	0.125555	0.105932	0.0237152				141.957	145.23	139.306	133.992	134.945	148.983	-0.0159302	0.00830805	0.075832	0.0397177	0.0702474	0.159287	0.0562436	0.0251513
706	149.832	150.466	145.01	137.249	140.765	154.895	0.0386907	0.137143	0.123212	0.0429312	0.0668156	0.140323	0.0915194	0.0193475				141.051	144.85	137.955	132.352	148.449	151.497	-0.0222107	0.00566977	0.0653985	0.026992	0.177348	0.178849	0.0720077	0.0355244
707	149.009	151.213	144.315	138.32	142.418	153.261	0.0329854	0.142789	0.117829	0.0510695	0.0793432	0.128294	0.0920517	0.0181495				141.111	144.521	136.911	131.782	144.001	145.965	-0.0217948	0.00338558	0.0573359	0.0225691	0.14207	0.135803	0.0565615	0.0281155
708	148.686	151.641	144.3	139.117	139.4	149.068	0.0307462	0.146024	0.117713	0.0571258	0.0564707	0.0974256	0.0842507	0.0177758				143.015	144.625	136.857	130.713	139.089	153.771	-0.00859594	0.00410764	0.0569189	0.0142741	0.103113	0.196544	0.0610603	0.0318465
709	149.081	152.807	143.5	138.666	138.583	150.476	0.0334845	0.154836	0.111516	0.0536987	0.0502789	0.107791	0.0852675	0.0190948				142.555	144.204	137.699	130.314	139.618	147.82	-0.0117847	0.0011847	0.0634215	0.011178	0.107309	0.150237	0.0535909	0.0265468
710	148.87	153.179	142.052	140.01	137.953	151.756	0.0320218	0.157647	0.1003	0.0639115	0.0455043	0.117214	0.0860999	0.0194538				142.784	144.083	136.225	130.621	138.456	146.332	-0.0101973	0.000344619	0.0520381	0.0135602	0.0980931	0.138659	0.0487496	0.0242111
711	148.827	154.167	142.586	139.305	140.84	153.739	0.0317237	0.165114	0.104436	0.0585543	0.067384	0.131813	0.0931709	0.0203592				143.949	143.384	134.87	130.984	138.049	151.862	-0.00212129	-0.00450842	0.0415737	0.0163769	0.0948652	0.181689	0.0546459	0.0295041
712	148.905	152.163	143.291	139.617	143.933	153.972	0.0322644	0.149969	0.109897	0.0609252	0.0908249	0.133528	0.0962348	0.0181044				142.781	143.142	135.006	130.099	134.523	141.851	-0.0102181	-0.00618859	0.042624	0.00950974	0.0669005	0.10379	0.034403	0.0184361
713	149.323	152.684	145.23	140.008	152.305	152.069	0.0351621	0.153906	0.124916	0.0638963	0.154274	0.119519	0.108612	0.0199296				142.758	143.06	134.867	128.335	132.465	135.799	-0.0103775	-0.0067579	0.0415505	-0.0041781	0.0505786	0.0566977	0.0212522	0.0128584
714	149.546	151.484	143.157	141.326	157.863	152.058	0.036708	0.144837	0.108859	0.0739116	0.196396	0.119438	0.113358	0.0226382				142.738	142.976	135.41	130.95	132.41	144.925	-0.0105161	-0.0073411	0.045744	0.0161131	0.0501424	0.12771	0.0369754	0.0209266
715	150.811	154.086	141.014	140.658	172.957	150.295	0.0454775	0.164502	0.0922601	0.0688356	0.310789	0.106459	0.131387	0.0394661				142.746	142.756	135.465	131.36	134.127	141.672	-0.0104607	-0.00886852	0.0461688	0.0192945	0.0637599	0.102397	0.0353819	0.0180104
716	150.904	155.567	141.456	142.223	173.21	152.444	0.0461222	0.175694	0.0956837	0.0807277	0.312707	0.122279	0.138869	0.0390291				142.722	142.571	134.817	132.536	134.057	130.208	-0.0106271	-0.0101529	0.0411644	0.0284198	0.0632047	0.0131922	0.0208668	0.0119367
717	153.238	154.338	140.305	141.608	169.621	151.711	0.0623024	0.166406	0.0867684	0.0760544	0.285507	0.116883	0.13232	0.0341611				142.229	142.579	134.175	132.416	134.346	135.413	-0.0140446	-0.0100974	0.0362064	0.0274886	0.0654968	0.0536941	0.0264573	0.01334
718	153.288	152.204	140.829	146.074	166.951	158.792	0.062649	0.150278	0.0908272	0.109991	0.265271	0.169013	0.141338	0.0294003				142.35	142.31	134.272	132.446	132.713	137.036	-0.0132058	-0.011965	0.0369555	0.0277214	0.0525455	0.0663232	0.0263958	0.013455
719	152.889	154.383	141.61	140.91	152.452	155.833	0.059883	0.166746	0.0968766	0.0707505	0.155388	0.147229	0.116145	0.0188539				142.209	143.586	134.015	132.737	134.26	137.782	-0.0141833	-0.00310597	0.0349707	0.0299794	0.0648147	0.0721281	0.0307673	0.0142082
720	152.983	157.155	142.898	139.74	140.038	159.309	0.0605346	0.187695	0.106853	0.0618598	0.0613059	0.172819	0.108511	0.023885				141.648	145.486	133.75	131.789	134.778	136.38	-0.0180722	0.0100854	0.0329242	0.0226234	0.0689229	0.0612187	0.0296171	0.0132404
721	151.681	157.228	143.856	138.284	142.283	156.289	0.0515087	0.188247	0.114274	0.0507959	0.0783201	0.150586	0.105622	0.0228058				142.208	145.9	133.324	131.353	133.365	138.764	-0.0141902	0.0129598	0.0296343	0.0192402	0.0577165	0.0797694	0.030855	0.0136624
722	152.803	155.213	144.113	139.47	148.183	157.261	0.0592868	0.173019	0.116264	0.0598081	0.123034	0.157742	0.114859	0.0195014				142.38	146.461	132.773	130.439	134.303	136.382	-0.0129979	0.0168547	0.025379	0.012148	0.0651557	0.0612342	0.0279623	0.0123129
723	152.888	153.123	144.307	141.643	149.303	159.794	0.059876	0.157224	0.117767	0.0763204	0.131523	0.176389	0.11985	0.0184624				142.239	146.385	132.537	130.582	131.577	143.097	-0.0139753	0.016327	0.0235564	0.0132576	0.0435358	0.113486	0.0326979	0.0178438
724	154.027	151.169	143.725	143.235	158.664	160.381	0.067772	0.142456	0.113259	0.0884177	0.202467	0.180711	0.132514	0.0214647				142.244	146.246	132.138	130.339	133.13	136.729	-0.0139406	0.015362	0.020475	0.011372	0.0558527	0.0639343	0.0255092	0.0119467
725	153.041	150.383	143.415	141.605	157.396	159.668	0.0609367	0.136516	0.110858	0.0760316	0.192857	0.175462	0.125444	0.0215905				141.879	147.266	132.077	130.119	131.735	130.846	-0.0164709	0.0224437	0.0200039	0.00966493	0.0447889	0.0181567	0.0164312	0.00813302
726	152.764	151.463	143.097	140.69	159.312	159.598	0.0590164	0.144678	0.108395	0.0690787	0.207378	0.174947	0.127249	0.0240793				143.055	146.791	134.531	129.57	133.347	145.583	-0.00831865	0.0191458	0.0389557	0.00540494	0.0575737	0.13283	0.040932	0.0207273
727	152.496	152.291	142.83	140.586	166.132	161.913	0.0571585	0.150936	0.106326	0.0682884	0.259064	0.191989	0.138961	0.031692				142.149	147.435	132.401	130.615	134.06	153.527	-0.0145992	0.023617	0.0225061	0.0135137	0.0632285	0.194645	0.0504852	0.0305789
728	153.162	151.869	140.906	138.898	162.787	163.978	0.0617755	0.147747	0.0914236	0.0554616	0.233714	0.207192	0.132885	0.0309186				141.304	146.961	135.049	131.173	134.414	151.064	-0.0204569	0.0203261	0.0429561	0.0178435	0.0660361	0.17548	0.0503641	0.0276465
729	154.782	151.847	138.688	138.795	157.806	172.377	0.0730059	0.14758	0.0742435	0.0546789	0.195964	0.269024	0.13575	0.0345544				141.096	146.187	135.798	131.149	134.37	153.102	-0.0218988	0.0149523	0.0487405	0.0176573	0.0656871	0.191338	0.0527461	0.030344
730	155.821	153.37	136.815	139.244	149.787	179.703	0.0802087	0.15909	0.0597357	0.0580908	0.135191	0.322958	0.135879	0.0410226				138.597	147.168	135.227	130.963	134.225	152.41	-0.0392223	0.0217633	0.0443307	0.016214	0.0645371	0.185953	0.0489294	0.0308865
731	156.839	148.992	136.522	138.704	147.218	174.047	0.0872658	0.126004	0.0574662	0.0539874	0.115721	0.281319	0.120294	0.0343595				140.735	146.713	135.443	130.722	133.648	149.706	-0.0244013	0.0186043	0.0459989	0.0143439	0.0599609	0.164913	0.0465699	0.0264841
732	156.684	147.975	135.213	139.062	151.598	158.869	0.0861913	0.118318	0.047327	0.0567078	0.148916	0.16958	0.104507	0.0202378				141.983	146.161	137.444	130.51	133.826	150.345	-0.0157499	0.0147718	0.0614522	0.0126989	0.0613726	0.169885	0.0507384	0.0268235
733	156.644	148.445	137.664	139.031	153.067	143.899	0.085914	0.12187	0.0663118	0.0564723	0.160049	0.0593719	0.0916648	0.0168779				145.477	146.496	136.788	130.246	133.833	146.758	0.00847106	0.0170977	0.056386	0.0106504	0.0614282	0.141973	0.0493344	0.0208034
734	158.185	148.714	138.822	139.118	155.631	145.338	0.0965968	0.123903	0.0752814	0.0571334	0.179481	0.0699657	0.100393	0.018484				145.319	146.508	136.546	130.122	133.948	142.19	0.00737578	0.017181	0.0545171	0.00968821	0.0623402	0.106428	0.0429218	0.0158904
735	159.163	147.409	138.239	136.572	146.712	144.499	0.103377	0.11404	0.0707656	0.0377868	0.111886	0.063789	0.0836074	0.0126146				146.146	146.608	135.708	130.232	133.873	141.519	0.0131087	0.0178753	0.0480454	0.0105418	0.0617454	0.101207	0.0420872	0.0145352
736	160.568	147.589	137.626	134.819	146.956	142.988	0.113117	0.115401	0.0660175	0.024466	0.113735	0.0526652	0.0809002	0.0158218				146.137	145.269	134.254	129.248	132.871	144.884	0.0130463	0.00857882	0.0368165	0.00290637	0.0537985	0.127391	0.0404229	0.0190844
737	161.997	148.875	138.45	138.021	149.164	141.279	0.123023	0.12512	0.0724	0.0487975	0.130469	0.0400837	0.0899821	0.0167935				145.909	144.139	133.84	129.729	133.788	142.853	0.0114658	0.000733418	0.0336192	0.00663871	0.0610713	0.111587	0.0375193	0.0173605
738	163.623	151.712	139.209	138.511	147.556	139.537	0.134295	0.14656	0.078279	0.0525209	0.118283	0.0272592	0.0928661	0.0194852				145.917	144.28	132.861	129.017	133.659	138.847	0.0115212	0.00171236	0.0260586	0.00111391	0.0600482	0.0804152	0.0301449	0.0134611
739	165.777	150.429	138.913	138.564	143.013	144.44	0.149227	0.136864	0.0759863	0.0529236	0.0838525	0.0633547	0.0937014	0.0162693				145.587	144.593	133.321	129.614	133.151	138.19	0.0092336	0.00388547	0.0296111	0.00574636	0.0560192	0.0753029	0.0299664	0.0121531
740	165.339	148.766	138.935	137.86	142.368	154.266	0.146191	0.124296	0.0761567	0.047574	0.0789643	0.135693	0.101479	0.0160668				145.375	144.144	132.19	131.6	131.893	130.136	0.00776398	0.000768132	0.0208766	0.0211568	0.046042	0.012632	0.0182066	0.00641579
741	166.37	146.414	139.122	138.074	138.327	163.326	0.153338	0.106521	0.0776051	0.0492002	0.0483387	0.202392	0.106232	0.0250929				145.299	142.483	133.482	132.485	133.094	126.057	0.00723714	-0.0107639	0.0308545	0.028024	0.0555672	-0.0191081	0.0153018	0.0114797
742	167.175	146.053	139.578	141.311	136.651	156.188	0.158919	0.103792	0.0811372	0.0737976	0.0356368	0.149842	0.100521	0.0192816				145.42	141.972	134.913	132.434	133.422	126.827	0.00807593	-0.0143117	0.0419058	0.0276283	0.0581685	-0.0131165	0.0180584	0.0120947
743	166.012	145.73	137.439	141.623	137.915	175.818	0.150856	0.101351	0.064569	0.0761684	0.0452163	0.294357	0.122086	0.0375324				145.559	141.462	133.944	132.61	132.026	141.353	0.0090395	-0.0178526	0.0344224	0.028994	0.0470969	0.0999152	0.0336026	0.0161785
744	166.954	148.256	136.349	138.181	138.989	177.334	0.157387	0.120441	0.0561262	0.0500133	0.0533558	0.305517	0.123807	0.0404752				145.157	140.817	133.264	133.471	132.813	142.202	0.00625277	-0.0223307	0.0291709	0.0356749	0.0533386	0.106522	0.0347713	0.0178876
745	167.471	148.155	137.157	137.748	137.416	153.386	0.160971	0.119678	0.0623847	0.046723	0.0414345	0.129214	0.0934009	0.0203143				145.592	140.553	133.493	133.337	133.159	144.261	0.00926826	-0.0241636	0.0309394	0.0346352	0.0560827	0.122543	0.0382175	0.0201869
746	167.309	147.308	137.089	137.219	135.769	164.867	0.159848	0.113277	0.061858	0.0427032	0.0289524	0.213736	0.103396	0.0296706				146.003	140.18	134.207	132.423	132.255	132.478	0.0121174	-0.0267533	0.0364535	0.0275429	0.0489131	0.0308559	0.0215216	0.0108252
747	165.682	145.351	137.102	136.584	135.717	159.31	0.148569	0.098487	0.0619587	0.0378779	0.0285583	0.172826	0.0913795	0.0242413				146.123	139.464	133.819	130.832	134.296	132.457	0.0129492	-0.0317243	0.033457	0.0151975	0.0651002	0.0306925	0.0209454	0.0130029
748	167.255	147.474	136.691	136.169	138.087	159.561	0.159473	0.114532	0.0587752	0.0347244	0.0465198	0.174674	0.0981164	0.0245789				145.83	139.363	134.577	130.102	132.393	129.213	0.0109181	-0.0324256	0.0393109	0.00953302	0.0500075	0.00544981	0.013799	0.0118249
749	166.278	146.771	136.02	135.597	139.533	159.138	0.1527	0.109219	0.0535778	0.0303779	0.0574786	0.17156	0.0958189	0.0235857				146.321	139.138	134.066	131.86	133.325	135.867	0.0143218	-0.0339877	0.0353646	0.0231743	0.0573992	0.0572268	0.0255832	0.0138931
750	165.676	148.897	135.578	135.203	138.745	157.078	0.148527	0.125286	0.0501542	0.027384	0.0515066	0.156395	0.0932087	0.0230992				146.56	138.994	133.153	131.464	133.682	143.97	0.0159786	-0.0349875	0.0283137	0.0201015	0.0602306	0.120279	0.034986	0.0211627
751	168.345	149.747	135.032	135.604	137.889	156.358	0.16703	0.13171	0.045925	0.0304311	0.0450193	0.151094	0.0952014	0.0250052				145.376	138.996	132.584	134.013	132.669	143.309	0.00777091	-0.0349736	0.0239194	0.0398806	0.0521965	0.115136	0.0339882	0.0204088
752	166.239	150.289	136.971	135.072	137.639	159.495	0.15243	0.135806	0.060944	0.0263885	0.0431246	0.174188	0.0988136	0.0256289				137.264	138.421	133.02	138.107	133.554	141.892	-0.0484628	-0.0389657	0.0272865	0.0716482	0.0592154	0.104109	0.0291385	0.0251634
753	163.515	149.056	137.559	134.574	135.768	156.712	0.133546	0.126487	0.0654985	0.0226043	0.0289448	0.1537	0.0884636	0.0231958				134.08	138.387	131.524	134.691	132.828	141.184	-0.0705349	-0.0392018	0.0157332	0.0451416	0.0534575	0.0986002	0.0171993	0.0255617
754	161.628	146.845	136.584	134.548	135.848	156.082	0.120465	0.109778	0.0579464	0.0224067	0.0295511	0.149062	0.0815349	0.0213135				134.374	137.948	133.536	131.529	133.387	141.893	-0.0684968	-0.0422497	0.0312715	0.0206059	0.0578909	0.104117	0.0171898	0.0260116
755	161.759	145.63	136.229	141.271	137.349	159.043	0.121373	0.100596	0.0551967	0.0734936	0.0409268	0.170861	0.0937411	0.0195303				134.975	138.205	132.717	130.839	133.882	143.264	-0.0643306	-0.0404654	0.0249465	0.0152518	0.0618168	0.114785	0.0186674	0.0267936
756	163.861	145.489	135.035	144.036	137.009	157.105	0.135945	0.0995299	0.0459482	0.0945044	0.03835	0.156593	0.0951451	0.0192407				136.365	137.835	133.105	129.852	132.736	143.267	-0.0546949	-0.0430342	0.027943	0.00759313	0.0527279	0.114809	0.0175573	0.0256864
757	161.112	144.378	134.433	139.301	137.191	154.962	0.116888	0.0911336	0.0412853	0.0585239	0.0397293	0.140817	0.0813961	0.0170816				136.509	137.981	131.512	130.073	133.773	141.425	-0.0536966	-0.0420206	0.0156405	0.00930799	0.0609523	0.100475	0.0151099	0.0240977
758	162.929	145.848	135.85	141.077	137.825	157.783	0.129484	0.102243	0.052261	0.0720195	0.0445342	0.161585	0.0936877	0.0187673				136.117	137.918	131.314	130.151	134.216	141.245	-0.056414	-0.042458	0.0141114	0.00991324	0.0644657	0.0990749	0.0147822	0.0244562
759	160.837	145.686	137.853	143.401	141.571	155.487	0.114981	0.101019	0.0677758	0.0896791	0.072924	0.144682	0.0985101	0.0116714				136.078	137.45	131.029	129.89	132.681	143.682	-0.0566844	-0.0457072	0.0119104	0.007888	0.0522917	0.118038	0.0146227	0.0263886
760	163.246	145.3	140.819	139.15	147.284	156.78	0.131682	0.0981016	0.0907497	0.0573765	0.116221	0.154201	0.108055	0.0138096				136.613	137.387	129.214	129.479	133.592	139.157	-0.0529757	-0.0461446	-0.00210644	0.00469882	0.0595168	0.0828274	0.00763605	0.0223719
761	161.099	144.294	139.472	139.408	140.958	149.264	0.116798	0.0904987	0.0803162	0.059337	0.0682783	0.0988686	0.0856827	0.00854598				136.341	138.034	129.346	128.965	133.313	130.811	-0.0548612	-0.0416526	-0.00108704	0.000710413	0.057304	0.0178844	-0.003617	0.0166047
762	163.058	143.761	137.221	138.295	140.776	152.276	0.130378	0.0864706	0.0628805	0.0508795	0.066899	0.121043	0.0864251	0.0133284				135.467	137.309	128.631	128.837	132.59	128.251	-0.0609199	-0.0466862	-0.00660884	-0.00028281	0.0515699	-0.00203583	-0.0108273	0.0162222
763	164.244	142.796	136.564	136.599	141.513	156.076	0.1386	0.0791776	0.0577915	0.0379919	0.0724845	0.149018	0.0891772	0.018264				135.965	137.63	128.044	128.777	133.647	140.14	-0.0574677	-0.0444575	-0.0111421	-0.000748383	0.059953	0.0904765	0.00610229	0.0237772
764	164.839	142.357	136.096	136.595	139.938	158.38	0.142725	0.0758599	0.0541665	0.0379615	0.060548	0.16598	0.0895401	0.0213002				136.104	138.324	128.088	129	133.853	142.482	-0.0565042	-0.0396392	-0.0108023	0.000981997	0.0615868	0.1087	0.0107206	0.025691
765	167.249	142.121	134.441	135.551	141.284	159.88	0.159432	0.0740763	0.0413473	0.0300284	0.070749	0.177023	0.0921092	0.0251362				136.165	137.526	127.361	129.106	132.173	141.217	-0.0560813	-0.0451796	-0.0164168	0.00180451	0.0482627	0.098857	0.00520776	0.024082
766	167.239	141.26	135.247	136.373	141.594	158.274	0.159362	0.0675693	0.0475903	0.0362746	0.0730983	0.165199	0.0915157	0.0230406				135.102	137.496	126.998	129.008	133.246	142.891	-0.0634502	-0.0453878	-0.0192202	0.00104407	0.0567727	0.111883	0.00694025	0.0270237
767	169.368	141.259	136.287	136.023	146.147	155.773	0.174121	0.0675618	0.0556459	0.033615	0.107604	0.146787	0.0975559	0.0224585				135.327	137.182	127.011	128.777	133.834	133.987	-0.0618904	-0.0475679	-0.0191198	-0.000748383	0.0614361	0.0425979	-0.00421541	0.0199513
768	167.368	141.597	136.153	135.537	157.76	157.989	0.160257	0.0701162	0.054608	0.029922	0.195616	0.163101	0.11227	0.0281165				135.555	136.964	127.845	128.723	133.105	127.503	-0.0603099	-0.0490814	-0.012679	-0.0011674	0.0556544	-0.00785627	-0.0125733	0.0167521
769	167.584	142.758	135.722	135.334	153.729	157.932	0.161754	0.0788904	0.0512696	0.0283794	0.165066	0.162682	0.108007	0.025522				134.727	136.952	127.496	128.646	133.374	126.68	-0.0660497	-0.0491647	-0.0153742	-0.00176488	0.0577878	-0.0142603	-0.0148043	0.0175566
770	167.851	142.48	136.289	134.518	141.82	156.713	0.163605	0.0767895	0.0556614	0.0221788	0.0748111	0.153707	0.0911255	0.0228421				135.338	137.18	126.697	127.971	133.643	130.928	-0.0618142	-0.0475818	-0.0215447	-0.00700258	0.0599213	0.0187948	-0.0098712	0.0182185
771	167.991	142.316	139.68	133.264	140.341	157.815	0.164576	0.07555	0.0819273	0.0126498	0.0636022	0.16182	0.0933542	0.0242253				138.65	137.374	126.459	128.259	132.723	133.654	-0.0388549	-0.0462349	-0.0233828	-0.00476783	0.0526248	0.0400067	-0.0034348	0.0168483
772	166.724	142.044	141.736	133.314	137.481	155	0.155792	0.0734944	0.0978526	0.0130298	0.0419272	0.141096	0.0871988	0.0227024				141.703	137.325	125.666	128.259	133.048	135.181	-0.0176909	-0.0465751	-0.0295069	-0.00476783	0.0552023	0.0518888	0.00142507	0.0174195
773	167.017	141.609	140.956	133.245	139.893	157.698	0.157823	0.0702069	0.0918109	0.0125055	0.060207	0.160959	0.0922521	0.0237296				141.842	137.456	125.391	129.331	133.853	133.741	-0.0167274	-0.0456656	-0.0316307	0.00355041	0.0615868	0.0406837	0.00196621	0.01713
774	166.53	141.748	139.652	131.748	140.291	157.551	0.154447	0.0712574	0.0817104	0.00113002	0.0632233	0.159877	0.0886075	0.0245353				144.17	137.492	124.893	131.335	133.734	132.596	-0.000589281	-0.0454156	-0.0354767	0.0191005	0.060643	0.0317741	0.00500601	0.0165561
775	167.694	140.945	138.886	130.846	140.92	151.865	0.162517	0.0651887	0.0757771	-0.00572412	0.0679903	0.118017	0.0806276	0.023081				143.414	137.451	124.974	132.581	132.264	132.407	-0.00583	-0.0457003	-0.0348511	0.0287689	0.0489844	0.0303034	0.00361257	0.0157101
776	167.005	140.824	138.47	130.809	137.559	148.985	0.15774	0.0642743	0.0725549	-0.00600528	0.0425183	0.0968146	0.0713162	0.0223445				143.975	137.528	124.887	132.028	132.712	133.363	-0.00194105	-0.0451657	-0.035523	0.0244779	0.0525375	0.0377424	0.00535468	0.0162454
777	167.269	140.328	137.845	130.673	139.447	155.288	0.15957	0.0605258	0.0677138	-0.00703872	0.0568269	0.143217	0.0801358	0.0251467				144.969	136.712	124.61	130.308	132.932	132.177	0.00494952	-0.050831	-0.0376622	0.0111315	0.0542823	0.0285137	0.00173064	0.0162196
778	168.004	140.204	137.445	132.352	136.194	156.118	0.164666	0.0595886	0.0646155	0.00571971	0.0321734	0.149327	0.0793483	0.0260961				145.531	137.169	124.372	130.218	132.989	133.124	0.0088454	-0.0476581	-0.0395002	0.0104331	0.0547344	0.0358826	0.00378953	0.0165488
779	166.244	139.89	136.921	131.531	136.684	150.355	0.152465	0.0572156	0.0605567	-0.000518924	0.0358869	0.1069	0.0687509	0.0220166				149.134	136.456	124.611	130.312	133.468	132.092	0.033822	-0.0526084	-0.0376545	0.0111625	0.0585333	0.0278523	0.00685121	0.017677
780	167.906	139.823	136.6	130.244	140.595	150.073	0.163986	0.0567092	0.0580704	-0.0102986	0.0655272	0.104824	0.0731365	0.023646				147.944	137.274	124.175	129.462	132.032	132.96	0.0255727	-0.0469292	-0.0410216	0.00456691	0.0471444	0.0346065	0.00398997	0.0162118
781	165.332	139.642	136.453	130.608	142.319	149.852	0.146142	0.0553413	0.0569317	-0.00753264	0.0785929	0.103197	0.0721122	0.0210901				149.444	136.461	128.305	128.709	132.591	132.249	0.035971	-0.0525737	-0.00912647	-0.00127603	0.0515779	0.029074	0.0089411	0.0154583
782	166.656	140.776	135.622	131.081	141.728	153.593	0.155321	0.0639115	0.050495	-0.0039384	0.0741139	0.130738	0.0784402	0.0234113				151.786	136.652	130.763	128.511	133.307	132.164	0.0522061	-0.0512476	0.00985617	-0.00281242	0.0572565	0.0284125	0.0156119	0.0164114
783	164.658	140.888	138.486	135.173	146.49	154.675	0.14147	0.064758	0.0726788	0.027156	0.110204	0.138704	0.0924951	0.01851				150.631	136.794	131.554	128.304	132.392	132.765	0.0441995	-0.0502617	0.0159649	-0.00441865	0.0499996	0.0330891	0.0147621	0.0153205
784	165.54	142.778	140.491	135.332	146.77	150.734	0.147584	0.0790416	0.0882091	0.0283642	0.112326	0.109691	0.0942026	0.0163487				151.527	136.169	132.045	127.87	133.972	132.14	0.0504107	-0.054601	0.0197568	-0.00778629	0.0625306	0.0282258	0.0164228	0.0173801
785	162.807	141.165	141.04	131.189	146.381	155.27	0.128638	0.0668514	0.0924615	-0.00311772	0.109378	0.143084	0.0895492	0.0215236				150.358	136.683	131.212	127.507	132.714	133.374	0.042307	-0.0510324	0.0133237	-0.010603	0.0525534	0.037828	0.0140628	0.0160108
786	160.342	140.996	138.542	132.295	146.035	150.242	0.11155	0.0655742	0.0731126	0.00528658	0.106755	0.106069	0.0780579	0.0165387				149.976	136.375	133.309	125.993	132.939	132.814	0.0396589	-0.0531708	0.0295184	-0.022351	0.0543379	0.0334704	0.0135773	0.0170662
787	163.875	141.324	138.178	134.832	141.685	143.006	0.136042	0.068053	0.0702932	0.0245648	0.073788	0.0527977	0.0709231	0.0149832				150.533	135.88	131.512	127.081	133.311	131.491	0.0435201	-0.0566075	0.0156405	-0.0139086	0.0572882	0.0231757	0.0115181	0.0168914
788	160.247	140.872	137.586	133.156	139.985	142.47	0.110891	0.064637	0.0657077	0.0118292	0.0609042	0.0488517	0.0604702	0.0130233				150.332	135.983	129.375	127.2	132.688	130.952	0.0421267	-0.0558924	-0.000863074	-0.0129852	0.0523472	0.0189816	0.00728581	0.0161761
789	164.36	141.342	137.222	131.984	141.208	142.577	0.139404	0.0681891	0.0628882	0.00292334	0.070173	0.0496394	0.0655362	0.0179491				151.465	135.895	130.069	127.103	132.969	132.534	0.0499809	-0.0565033	0.00449655	-0.0137379	0.0545758	0.0312916	0.0116839	0.0173573
790	161.066	143.323	136.766	132.071	138.235	144.402	0.116569	0.0831604	0.0593561	0.00358444	0.0476415	0.0630749	0.0622311	0.0153318				150.394	135.807	133.853	126.233	133.647	136.557	0.0425565	-0.0571143	0.0337196	-0.0204887	0.059953	0.0625959	0.0202037	0.0197428
791	161.43	145.636	136.433	131.234	138.131	141.064	0.119092	0.100641	0.0567768	-0.00277577	0.0468533	0.0385009	0.0598481	0.018009				149.881	135.853	135.981	127.671	132.585	137.476	0.0390003	-0.0567949	0.0501537	-0.00933045	0.0515303	0.069747	0.024051	0.0194923
792	161.949	146.57	135.834	130.445	140.319	144.553	0.12269	0.1077	0.0521371	-0.00877125	0.0634355	0.0641866	0.0668963	0.0189214				148.36	135.675	137.601	129.96	132.728	137.18	0.0284565	-0.0580307	0.0626647	0.00843117	0.0526644	0.0674437	0.0269383	0.019273
793	165.588	146.601	135.928	130.117	139.889	148.795	0.147917	0.107934	0.0528652	-0.0112637	0.0601767	0.0954158	0.0755075	0.0223367				148.021	135.889	137.239	132.319	133.025	139.022	0.0261065	-0.056545	0.059869	0.0267359	0.0550199	0.0817769	0.0321606	0.0197373
794	165.223	145.199	139.281	130.005	138.694	150.365	0.145387	0.0973383	0.0788367	-0.0121147	0.0511201	0.106974	0.0779235	0.0220592				147.428	135.939	136.33	133.646	132.199	132.2	0.0219957	-0.0561978	0.052849	0.0370329	0.0484689	0.0286927	0.0221402	0.0163685
795	168.061	143.389	138.447	131.06	140.527	149.551	0.165061	0.0836592	0.0723768	-0.00409797	0.0650119	0.100981	0.0804987	0.0223925				147.102	136.087	134.234	133.465	135.655	131.33	0.0197358	-0.0551703	0.036662	0.0356284	0.0758784	0.0219229	0.0224429	0.0175716
796	166.113	143.073	138.089	132.381	140.555	147.75	0.151557	0.0812711	0.0696038	0.00594008	0.0652241	0.0877226	0.0768864	0.0190916				146.818	136.913	134.332	131.534	136.375	132.793	0.0177671	-0.0494355	0.0374188	0.0206447	0.0815887	0.033307	0.0235485	0.0173444
797	168.224	144.121	136.821	133.339	139.415	146.609	0.166191	0.0891913	0.0597822	0.0132198	0.0565844	0.0793227	0.0773818	0.0207279				146.09	137.38	134.025	133.1	136.615	136.338	0.0127205	-0.0461932	0.0350479	0.0327962	0.0834922	0.0608918	0.0297926	0.0182142
798	167.881	146.474	136.76	133.92	140.334	145.958	0.163813	0.106974	0.0593097	0.0176347	0.0635492	0.0745301	0.0809684	0.0203016				145.105	138.802	133.292	135.265	134.761	142.822	0.0058923	-0.0363205	0.0293871	0.0495956	0.0687881	0.111346	0.0381148	0.020889
799	167.295	146.477	135.783	134.851	139.186	145.75	0.159751	0.106997	0.0517421	0.0247092	0.0548488	0.0729988	0.0785077	0.0196747				145.006	139.423	132.41	135.309	132.09	142.778	0.00520601	-0.032009	0.0225756	0.049937	0.0476044	0.111004	0.034053	0.0197361
800	167.611	146.101	135.667	135.662	140.026	144.272	0.161941	0.104155	0.0508436	0.0308718	0.0612149	0.0621179	0.0785241	0.01934				142.851	139.606	131.88	135.543	135.04	143.414	-0.00973281	-0.0307385	0.0184825	0.0517527	0.0710009	0.115953	0.0361196	0.0221494
801	167.596	144.737	135.481	136.657	139.975	141.947	0.161837	0.0938467	0.0494028	0.0384327	0.0608284	0.0450014	0.0748916	0.0191389				135.064	138.832	132.439	136.014	135.429	143.381	-0.0637136	-0.0361122	0.0227996	0.0554075	0.074086	0.115696	0.0280272	0.0277575
802	168.717	143.938	135.478	137.041	139.634	138.813	0.169608	0.0878083	0.0493796	0.0413506	0.0582441	0.0219292	0.0713867	0.0215425				135.06	139.973	131.881	136.003	137.051	147.444	-0.0637413	-0.0281904	0.0184903	0.0553221	0.0869501	0.147311	0.0360237	0.0314827
803	167.231	143.889	137.266	137.063	140.254	139.474	0.159307	0.087438	0.063229	0.0415178	0.0629429	0.0267954	0.0735383	0.0191296				134.929	140.487	131.966	135.803	139.364	145.431	-0.0646494	-0.0246218	0.0191467	0.0537702	0.105294	0.131648	0.0367646	0.0307418
804	167.895	144.359	139.225	137.524	139.943	143.028	0.16391	0.09099	0.078403	0.0450208	0.0605859	0.0529597	0.0819782	0.0177692				136.059	141.034	131.702	135.654	139.933	146.913	-0.0568161	-0.0208241	0.0171079	0.052614	0.109807	0.143179	0.0408447	0.0312361
805	167.686	144.821	138.385	135.378	137.789	144.931	0.162461	0.0944815	0.0718965	0.0287138	0.0442614	0.0669694	0.0781306	0.0192627				139.69	142.117	130.754	135.964	139.548	150.148	-0.0316454	-0.013305	0.00978666	0.0550195	0.106754	0.168352	0.0491603	0.0313793
806	169.054	144.385	139.895	134.448	138.728	146.228	0.171945	0.0911865	0.0835926	0.0216468	0.0513778	0.0765178	0.082711	0.0206432				142.522	140.992	130.087	135.956	140.75	148.754	-0.0120135	-0.0211157	0.00463556	0.0549574	0.116287	0.157505	0.0500426	0.0299649
807	168.437	143.486	140.604	134.462	138.748	145.48	0.167667	0.0843923	0.0890844	0.0217532	0.0515294	0.0710111	0.0809063	0.0200554				142.286	141.029	130.717	136.111	139.302	147.149	-0.0136495	-0.0208588	0.00950092	0.0561602	0.104803	0.145016	0.0468286	0.0275205
808	169.301	143.388	136.969	133.683	133.45	147.756	0.173657	0.0836517	0.0609285	0.0158337	0.0113774	0.0877668	0.0722025	0.0242697				140.795	142.116	129.413	136.337	140.377	142.112	-0.0239853	-0.0133119	-0.000569608	0.0579138	0.113329	0.105821	0.0398661	0.0249082
809	167.614	143.461	137.54	133.136	133.369	151.961	0.161962	0.0842034	0.0653514	0.0116772	0.0107635	0.118724	0.0754469	0.0243494				142.385	142.722	128.533	136.042	139.221	134.364	-0.0129632	-0.00910458	-0.00736567	0.0556248	0.10416	0.0455315	0.0293139	0.0192925
810	168.612	143.888	140.135	132.019	134.19	147.861	0.168881	0.0874304	0.0854516	0.0031893	0.0169857	0.0885398	0.0750796	0.0243468				144.492	142.846	127.851	135.893	139.782	126.702	0.00164288	-0.00824367	-0.0126326	0.0544686	0.10861	-0.0140891	0.0216259	0.0203187
811	166.828	143.645	139.737	131.129	137.054	141.66	0.156513	0.0855939	0.0823688	-0.00357365	0.0386911	0.0428886	0.0670803	0.0223293				145.454	144.001	127.274	135.696	138.67	128.031	0.00831162	-0.000224693	-0.0170887	0.0529399	0.0997904	-0.00374773	0.0233301	0.0181385
812	166.297	142.628	139.038	132.113	140.99	146.948	0.152832	0.077908	0.0769545	0.00390359	0.0685208	0.0818184	0.0769896	0.0193128				145.307	143.96	131.418	138.114	139.007	126.878	0.00729259	-0.00050935	0.0149146	0.0717025	0.102463	-0.0127196	0.030524	0.018697
813	167.135	142.375	138.062	132.945	144.372	149.939	0.158641	0.0759959	0.0693946	0.0102258	0.094152	0.103838	0.0853746	0.019813				145.418	143.081	131.785	140.909	138.547	128.879	0.00806207	-0.0066121	0.0177489	0.0933905	0.0988148	0.00285085	0.0357092	0.0193797
814	165.553	142.374	138.415	132.059	143.348	149.498	0.147674	0.0759884	0.0721289	0.00349326	0.0863914	0.100591	0.0810446	0.0191219				146.517	142.67	130.881	138.154	138.831	134.108	0.0156805	-0.00946561	0.0107675	0.0720129	0.101067	0.0435395	0.0389337	0.0169829
815	164.947	142.493	136.472	132.649	144.637	149.453	0.143473	0.0768877	0.0570789	0.00797656	0.0961603	0.10026	0.0803062	0.018639				146.362	142.502	130.996	138.822	138.727	135.627	0.014606	-0.010632	0.0116556	0.0771963	0.100242	0.0553593	0.0414046	0.0175581
816	165.085	142.178	135.071	132.323	145.646	150.702	0.14443	0.0745071	0.0462271	0.00549935	0.103807	0.109455	0.0806543	0.0202519				145.713	142.035	131.284	137.79	139.298	136.643	0.0101071	-0.0138743	0.0138797	0.0691884	0.104771	0.0632651	0.0412229	0.0183101
817	164.729	142.251	134.476	132.216	143.902	152.042	0.141962	0.0750588	0.0416184	0.00468627	0.09059	0.11932	0.0788726	0.0205423				144.68	141.256	131.007	140.4	138.8	139.124	0.00294613	-0.0192828	0.0117405	0.0894409	0.100821	0.0825706	0.0447061	0.0212203
818	165.084	141.81	137.613	133.027	144.203	153.191	0.144423	0.071726	0.0659168	0.0108489	0.0928712	0.127779	0.0855941	0.0195446				144.781	141.034	130.344	138.265	138.357	130.399	0.00364627	-0.0208241	0.00662032	0.0728742	0.097308	0.0146785	0.0290505	0.0186388
819	164.27	142.078	137.672	133.066	142.061	151.029	0.13878	0.0737514	0.0663738	0.0111453	0.0766376	0.111862	0.0797584	0.0177454				144.816	140.821	130.041	137.364	140.559	129.396	0.0038889	-0.0223029	0.00428031	0.0658829	0.114772	0.0068738	0.0288992	0.0208809
820	164.13	141.984	137.186	132.572	143.34	153.925	0.13781	0.073041	0.0626094	0.00739145	0.0863308	0.133182	0.0833941	0.0198025				145.206	141.352	129.42	133.571	138.566	132.718	0.00659245	-0.0186163	-0.000515548	0.0364509	0.0989655	0.0327234	0.0259334	0.0168807
821	163.34	142.322	136.5	132.077	142.556	156.071	0.132333	0.0755954	0.0572958	0.00363003	0.0803891	0.148981	0.0830374	0.0214548				145.007	141.071	129.103	136.438	140.533	132.346	0.00521294	-0.0205672	-0.00296368	0.0586975	0.114566	0.0298287	0.0307957	0.0201901
822	164.782	141.616	136.157	131.917	143.006	152.444	0.14233	0.0702598	0.054639	0.00241422	0.0837995	0.122279	0.0792869	0.0203646				144.93	140.766	129.941	136.801	138.387	132.857	0.00467917	-0.0226848	0.00350803	0.0615142	0.0975459	0.033805	0.0297279	0.0179706
823	162.754	141.448	135.935	131.807	142.583	147.892	0.128271	0.0689902	0.0529194	0.00157835	0.0805937	0.088768	0.0701867	0.0171601				144.89	141.191	130.261	136.985	140.54	132.883	0.00440188	-0.0197341	0.00597932	0.062942	0.114621	0.0340073	0.033703	0.0199043
824	165.002	141.145	135.795	132.163	142.618	138.768	0.143855	0.0667002	0.051835	0.00428353	0.0808589	0.0215979	0.0615217	0.0201192				144.614	141.612	129.744	134.453	138.118	134.473	0.0024886	-0.0168111	0.00198664	0.0432948	0.0954125	0.0463796	0.0287918	0.0167809
825	165.73	141.224	135.543	132.128	143.455	144.918	0.148902	0.0672973	0.0498831	0.00401757	0.0872023	0.0668737	0.0706959	0.0194027				144.218	142.085	129.52	134.465	140.769	126.905	-0.000256536	-0.0135272	0.000256732	0.0433879	0.116438	-0.0125095	0.0222982	0.0206531
826	167.108	140.708	134.558	132.274	139.306	150.25	0.158454	0.0633976	0.0422535	0.005127	0.0557583	0.106127	0.071853	0.0218583				144.385	142.175	129.449	131.748	137.638	123.788	0.000901136	-0.0129023	-0.000291587	0.0223052	0.0916056	-0.0367639	0.010809	0.017988
827	168.259	141.034	134.895	132.241	141.175	150.56	0.166433	0.0658614	0.0448638	0.00487624	0.0699229	0.10841	0.0767279	0.0226518				144.489	142.057	128.137	131.483	133.902	125.968	0.00162208	-0.0137216	-0.0104239	0.020249	0.0619754	-0.0198006	0.00665006	0.0124863
828	167.812	140.353	138.386	132.096	149.929	152.629	0.163335	0.0607147	0.0719043	0.00377441	0.136267	0.123641	0.0932727	0.0239486				144.823	142.113	126.214	130.136	132.321	126.852	0.00393743	-0.0133328	-0.0252748	0.00979685	0.0494365	-0.0129219	0.00194021	0.0108265
829	169.951	140.674	139.015	132.032	149.752	148.217	0.178163	0.0631407	0.0767764	0.00328809	0.134925	0.0911606	0.0912424	0.0246295				144.667	141.876	126.903	128.765	134.816	128.665	0.00285601	-0.0149782	-0.0199538	-0.000841497	0.0692243	0.00118564	0.00624874	0.0131536
830	168.312	140.121	140.294	132.792	151.261	144.008	0.166801	0.0589614	0.0866832	0.00906319	0.146362	0.0601743	0.0880074	0.0241288				144.313	141.432	127.165	129.447	135.53	131.85	0.00040202	-0.0180608	-0.0179305	0.00445052	0.074887	0.0259692	0.0116196	0.0143062
831	167.633	140.387	139.793	133.08	153.042	138.278	0.162094	0.0609717	0.0828026	0.0112517	0.159859	0.0179906	0.0824949	0.027093				144.209	142.702	127.593	129.508	134.332	129.508	-0.000318926	-0.00924344	-0.0146251	0.00492385	0.0653857	0.00774531	0.0089779	0.0117974
832	167.961	142.025	139.713	133.468	150.786	136.838	0.164368	0.0733508	0.0821829	0.0142	0.142762	0.00738942	0.0807088	0.0262709				144.05	142.881	128.11	130.002	135.954	136.052	-0.00142114	-0.00800067	-0.0106324	0.00875707	0.0782498	0.0586664	0.0209365	0.0154817
833	167.66	142.267	139.206	132.905	142.561	136.624	0.162281	0.0751797	0.0782558	0.00992186	0.080427	0.00581397	0.0686465	0.0234078				143.953	144.199	128.401	129.129	139.008	136.783	-0.00209356	0.00114999	-0.00838508	0.00198298	0.102471	0.0643545	0.02658	0.018693
834	168.263	141.829	138.475	131.719	140.668	139.466	0.166461	0.0718696	0.0725936	0.000909655	0.0660805	0.0267365	0.0674418	0.023048				143.165	144.563	127.611	128.992	137.652	136.235	-0.00755611	0.00367718	-0.0144861	0.000919921	0.0917166	0.0600904	0.0223936	0.0176023
835	167.551	142.713	138.029	130.25	144.472	142.306	0.161525	0.0785504	0.069139	-0.010253	0.0949098	0.0476444	0.073586	0.0230466				140.481	145.86	128.058	130.145	137.487	135.991	-0.026162	0.012682	-0.011034	0.00986668	0.090408	0.0581917	0.0223254	0.0179199
836	166.249	143.024	137.683	130.968	145.024	138.716	0.152499	0.0809007	0.066459	-0.00479706	0.0990933	0.0212151	0.0692284	0.0229165				139.984	146.239	128.09	129.04	135.927	128.515	-0.0296073	0.0153134	-0.0107869	0.00129238	0.0780357	1.84418e-05	0.00904427	0.0150863
837	165.827	142.75	137.38	131.112	147.144	139.721	0.149574	0.07883	0.064112	-0.00370283	0.11516	0.0286138	0.0720978	0.0228054				139.675	145.781	127.366	129.752	136.333	123.954	-0.0317494	0.0121336	-0.0163782	0.00681718	0.0812556	-0.0354722	0.00276776	0.0175924
838	164.945	142.764	136.764	131.481	146.09	140.679	0.14346	0.0789358	0.0593407	-0.000898865	0.107172	0.0356665	0.0706126	0.0209561				142.776	145.907	127.519	136.142	135.053	124.474	-0.0102527	0.0130084	-0.0151966	0.0564007	0.071104	-0.0314259	0.0139396	0.0168956
839	165.285	142.408	136.382	131.695	148.758	139.496	0.145817	0.0762453	0.0563818	0.000727284	0.127392	0.0269574	0.0722534	0.0230126				143.147	145.847	126.491	136.652	133.542	126.449	-0.00768089	0.0125918	-0.0231356	0.0603581	0.0591202	-0.0160578	0.0141993	0.0152088
840	165.565	143.528	135.439	133.471	140.227	140.201	0.147758	0.0847097	0.0490775	0.0142228	0.0627383	0.0321475	0.0651089	0.0192817				141.877	145.319	126.642	138.062	133.783	127.172	-0.0164847	0.00892596	-0.0219695	0.071299	0.0610316	-0.0104319	0.0153951	0.0166626
841	165.841	143.345	134.52	133.275	136.562	146.663	0.149671	0.0833267	0.0419592	0.0127334	0.0349623	0.0797202	0.0670621	0.019884				142.185	144.856	126.436	136.638	134.085	127.421	-0.0143496	0.00571143	-0.0235604	0.0602494	0.0634268	-0.00849434	0.0138305	0.0156748
842	165.713	142.395	134.542	134.809	136.968	148.375	0.148784	0.0761471	0.0421296	0.02439	0.0380393	0.0923238	0.0703022	0.0188157				142.887	144.363	126.435	136.883	132.56	129.337	-0.00948325	0.00228861	-0.0235681	0.0621505	0.051332	0.0064147	0.0148558	0.0139825
843	164.916	142.935	133.98	138.075	135.032	151.113	0.143259	0.0802281	0.0377765	0.0492078	0.0233669	0.112481	0.0743864	0.0189789				142.293	143.966	126.382	134.163	132.955	124.863	-0.013601	-0.000467693	-0.0239774	0.0410446	0.0544648	-0.028399	0.00484404	0.0142325
844	166.403	142.786	133.629	134.142	136.581	146.609	0.153567	0.0791021	0.0350577	0.0193216	0.0351063	0.0793227	0.0669129	0.0200855				142.808	143.324	126.193	134.112	133.029	125.418	-0.0100309	-0.00492499	-0.025437	0.0406488	0.0550516	-0.0240804	0.00520453	0.0139908
845	166.876	142.24	133.558	136.621	137.507	144.363	0.156846	0.0749757	0.0345078	0.0381591	0.0421242	0.0627878	0.0682334	0.0188422				142.47	143.025	126.422	137.262	133.038	127.068	-0.012374	-0.0070009	-0.0236685	0.0650914	0.055123	-0.0112412	0.0109883	0.0157477
846	167.323	141.412	133.523	137.478	137.033	149.378	0.159945	0.0687181	0.0342367	0.0446713	0.0385319	0.0997078	0.0743018	0.0198108				141.87	142.867	125.883	141.506	132.062	128.417	-0.0165333	-0.00809787	-0.0278311	0.0980229	0.0473824	-0.000744129	0.0153665	0.0196221
847	166.448	140.338	133.419	135.139	134.059	146.965	0.153879	0.0606014	0.0334311	0.0268976	0.0159928	0.0819435	0.0621242	0.0208218				142.181	142.719	126.086	140.62	132.077	130.276	-0.0143774	-0.00912541	-0.0262634	0.091148	0.0475013	0.0137214	0.0171008	0.0182371
848	165.741	142.186	133.439	134.596	133.643	146.408	0.148978	0.0745676	0.033586	0.0227715	0.0128401	0.0778429	0.0617643	0.0206047				142.852	142.311	125.651	137.669	131.895	131.56	-0.00972588	-0.0119581	-0.0296228	0.0682495	0.0460579	0.0237126	0.0144522	0.0154957
849	165.236	141.644	135.451	133.76	135.247	146.01	0.145477	0.0704714	0.0491705	0.0164189	0.0249963	0.0749129	0.0635745	0.0189768				142.166	142.274	126.086	133.849	132.015	131.827	-0.0144813	-0.012215	-0.0262634	0.0386081	0.0470096	0.0257902	0.00974137	0.0127082
850	164.018	140.959	136.555	132.431	137.276	149.408	0.137033	0.0652945	0.0577218	0.00632002	0.0403735	0.0999287	0.0677786	0.0186774				142.958	142.129	126.23	134.504	132.087	138.773	-0.00899107	-0.0132217	-0.0251513	0.0436906	0.0475807	0.0798394	0.0206244	0.0172077
851	162.87	141.127	136.454	133.223	138.418	145.793	0.129075	0.0665642	0.0569395	0.0123383	0.0490284	0.0733154	0.0645434	0.0155663				140.368	142.08	125.681	136.476	131.252	147.98	-0.0269454	-0.0135619	-0.0293911	0.0589924	0.0409583	0.151482	0.0302557	0.0285107
852	162.81	141.665	136.483	132.65	135.773	144.527	0.128659	0.0706301	0.0571641	0.00798416	0.0289827	0.0639952	0.0595692	0.01685				133.707	142.032	125.998	137.743	131.652	145.41	-0.0731206	-0.0138951	-0.026943	0.0688237	0.0441307	0.131484	0.0217466	0.0302216
853	162.526	142.14	136.722	131.213	135.358	145.878	0.12669	0.0742199	0.0590153	-0.00293535	0.0258376	0.0739411	0.0594615	0.0182312				131.52	141.747	125.292	135.391	131.929	141.598	-0.0882812	-0.0158738	-0.0323953	0.0505733	0.0463276	0.101822	0.010362	0.0280014
854	161.338	142.323	135.851	131.161	135.223	144.166	0.118455	0.0756029	0.0522688	-0.00333049	0.0248145	0.0613375	0.054858	0.0171387				133.494	142.147	125.442	133.453	131.673	148.214	-0.0745971	-0.0130967	-0.0312368	0.0355353	0.0442972	0.153303	0.0190341	0.0322826
855	161.875	142.802	135.439	129.882	133.563	146.176	0.122177	0.079223	0.0490775	-0.0130494	0.0122338	0.076135	0.0542995	0.0200317				133.765	142.028	125.481	133.337	130.669	144.634	-0.0727185	-0.0139229	-0.0309356	0.0346352	0.0363345	0.125446	0.0131397	0.0280828
856	160.897	142.728	134.906	130.297	135.131	145.704	0.115397	0.0786637	0.044949	-0.00989587	0.0241172	0.0726601	0.0543153	0.0180584				133.208	145.538	124.839	132.417	131.117	148.473	-0.0765797	0.0104464	-0.0358937	0.0274964	0.0398876	0.155318	0.0201126	0.0323036
857	161.175	142.912	134.289	130.068	132.381	144.817	0.117325	0.0800543	0.0401699	-0.011636	0.00327579	0.0661301	0.0492198	0.0198084				133.305	146.642	125.264	131.929	131.053	151.779	-0.0759073	0.0181113	-0.0326115	0.0237097	0.03938	0.181043	0.025621	0.0356392
858	159.808	146.378	133.87	129.374	133.434	144.931	0.107848	0.106249	0.0369244	-0.0169096	0.0112562	0.0669694	0.0520562	0.020754				132.893	150.923	124.851	134.804	131.022	152.254	-0.0787633	0.0478336	-0.035801	0.0460184	0.0391341	0.18474	0.0338602	0.0368204
859	161.494	146.688	133.874	128.65	133.083	146.159	0.119536	0.108591	0.0369554	-0.0224111	0.00859604	0.0760098	0.0545462	0.0230568				133.755	153.388	125.185	134.618	131.621	152.252	-0.0727878	0.0649477	-0.0332216	0.0445752	0.0438848	0.184724	0.038687	0.0363665
860	163.774	145.634	133.455	128.424	133.253	143.737	0.135342	0.100626	0.0337099	-0.0241285	0.00988442	0.0581793	0.0522688	0.0239805				133.109	154.394	125.302	135.897	130.317	152.42	-0.077266	0.0719322	-0.032318	0.0544996	0.0335428	0.186031	0.0394036	0.0372271
861	165.397	144.756	133.304	128.333	132.831	144.471	0.146593	0.0939903	0.0325403	-0.02482	0.00668621	0.0635829	0.0530955	0.0252793				132.325	148.873	125.167	136.041	130.985	153.13	-0.0827008	0.0336008	-0.0333606	0.055617	0.0388407	0.191556	0.0339255	0.0380663
862	166.288	144.475	133.116	128.025	134.904	147.043	0.15277	0.0918666	0.0310841	-0.0271604	0.0223969	0.0825177	0.0589125	0.0257997				132.376	147.023	127.014	135.618	130.02	153.138	-0.0823473	0.0207566	-0.0190966	0.0523347	0.0311873	0.191618	0.0324088	0.0372844
863	165.439	144.168	132.813	127.533	137.414	148.261	0.146884	0.0895465	0.0287372	-0.030899	0.0414194	0.0914846	0.0611955	0.0251594				132.516	146.532	128.655	135.357	130.556	151.02	-0.0813768	0.0173476	-0.00642349	0.0503095	0.0354383	0.175137	0.0317388	0.0343416
864	167.266	145.302	134.454	127.193	135.261	143.409	0.15955	0.0981167	0.041448	-0.0334826	0.0251024	0.0557646	0.0577498	0.0268648				132.63	146.222	129.083	135.011	130.771	151.155	-0.0805865	0.0151953	-0.00311813	0.0476247	0.0371435	0.176188	0.0320745	0.0342793
865	166.459	144.024	136.611	127.306	133.103	140.485	0.153955	0.0884582	0.0581556	-0.032624	0.00874761	0.0342383	0.0518218	0.0265262				133.24	145.599	128.854	132.325	130.185	145.854	-0.0763579	0.01087	-0.00488665	0.0267825	0.0324959	0.134939	0.0206405	0.0279274
866	164.793	143.276	138.081	127.111	132.673	143.065	0.142406	0.0828052	0.0695418	-0.0341057	0.00548877	0.0532321	0.053228	0.025166				132.61	145.1	128.801	132.308	131.014	142.858	-0.0807251	0.00740548	-0.00529596	0.0266506	0.0390707	0.111626	0.0164553	0.0256073
867	164.184	142.372	135.993	126.358	133.9	143.241	0.138184	0.0759733	0.0533687	-0.0398276	0.0147878	0.0545277	0.0495023	0.0243518				132.885	141.497	128.981	132.635	129.91	138.624	-0.0788188	-0.0176096	-0.00390586	0.029188	0.0303149	0.07868	0.0063081	0.0218025
868	163.238	141.997	137.843	127.913	134.869	146.283	0.131626	0.0731392	0.0676983	-0.0280115	0.0221316	0.0769227	0.0572511	0.0221985				133.1	140.325	128.645	132.951	130.874	141.65	-0.0773284	-0.0257466	-0.00650072	0.03164	0.0379604	0.102226	0.0103752	0.0251205
869	163.246	142.26	143.285	129.838	136.661	144.423	0.131682	0.0751268	0.109851	-0.0133837	0.0357126	0.0632295	0.0670362	0.0212451				133.201	138.329	128.342	133.128	131.428	138.387	-0.0766282	-0.0396045	-0.00884072	0.0330134	0.0423541	0.0768358	0.00452165	0.023226
870	162.861	139.78	138.684	130.829	145.369	147.469	0.129013	0.0563843	0.0742125	-0.0058533	0.101708	0.0856539	0.0735196	0.0188109				132.99	140.336	128.442	132.876	131.354	138.861	-0.0780909	-0.0256702	-0.00806844	0.031058	0.0417672	0.0805241	0.00691997	0.022897
871	162.858	139.686	138.167	131.355	151.378	150.924	0.128992	0.0556739	0.070208	-0.00185632	0.147248	0.111089	0.0852258	0.022445				133.684	141.295	128.105	132.904	133.192	138.92	-0.07328	-0.019012	-0.010671	0.0312753	0.0563444	0.0809832	0.01094	0.022977
872	162.311	139.626	137.376	131.542	151.154	142.776	0.1252	0.0552204	0.0640811	-0.000435337	0.145551	0.0511045	0.0734535	0.0217983				133.964	141.344	128.511	132.209	135.062	135.514	-0.071339	-0.0186718	-0.00753557	0.0258824	0.0711753	0.05448	0.00899856	0.0213797
873	162.802	141.688	136.259	132.731	157.545	142.548	0.128604	0.0708039	0.055429	0.00859967	0.193986	0.0494259	0.0844747	0.0270531				134.236	138.82	128.511	132.177	135.896	133.668	-0.0694534	-0.0361955	-0.00753557	0.0256341	0.0777898	0.0401157	0.00505917	0.0218744
874	163.152	144.788	136.003	133.748	152.405	146.58	0.13103	0.0942321	0.0534461	0.0163277	0.155032	0.0791092	0.0881961	0.0206506				134.437	136.652	128.36	131.758	132.752	130.058	-0.0680601	-0.0512476	-0.00870171	0.0223828	0.0528548	0.012025	-0.00679112	0.0187054
875	162.801	143.439	135.344	134.269	140.329	146.122	0.128597	0.0840371	0.0483417	0.0202867	0.0635113	0.0757374	0.0700851	0.0148841				137.644	135.645	128.377	131.705	133.776	128.608	-0.0458286	-0.058239	-0.00857043	0.0219716	0.0609761	0.000742106	-0.00482471	0.0179139
876	163.111	141.572	134.541	135.908	140.431	144.621	0.130746	0.0699273	0.0421218	0.0327411	0.0642843	0.0646872	0.0674179	0.0139956				138.921	136.198	128.855	132.134	132.878	128.026	-0.0369762	-0.0543996	-0.00487893	0.0253004	0.0538541	-0.00378663	-0.00348116	0.0161579
877	163.199	141.623	134.504	133.48	147.197	142.68	0.131356	0.0703127	0.0418352	0.0142912	0.115562	0.0503977	0.0706257	0.0183658				144.298	140.276	130.789	131.971	131.296	124.743	0.000298037	-0.0260868	0.010057	0.0240356	0.0413072	-0.0293328	0.00337972	0.0113396
878	162.638	142.562	134.441	133.148	156.991	142.517	0.127467	0.0774092	0.0413473	0.0117684	0.189788	0.0491977	0.0828295	0.0266855				143.667	140.009	130.099	133.107	134.247	124.391	-0.00407616	-0.0279405	0.00472823	0.0328505	0.0647116	-0.0320718	0.00636697	0.0151347
879	158.111	142.551	134.505	132.274	152.398	143.351	0.0960838	0.077326	0.041843	0.005127	0.154979	0.0553376	0.0717827	0.0209385				144.007	139.98	131.922	132.359	136.744	124.728	-0.00171922	-0.0281418	0.0188069	0.0270463	0.0845153	-0.0294495	0.011843	0.0173673
880	156.129	143.368	134.121	131.291	156.411	140.75	0.0823438	0.0835005	0.0388686	-0.00234264	0.185392	0.0361892	0.0706586	0.0264532				144.127	140.047	134.652	132.692	139.229	124.679	-0.000887364	-0.0276767	0.0398901	0.0296303	0.104224	-0.0298308	0.0192249	0.0206324
881	155.74	141.679	133.626	130.679	143.689	141.852	0.0796471	0.0707359	0.0350345	-0.00699312	0.0889757	0.0443021	0.0519504	0.0145027				144.603	142.451	135.761	131.333	139.281	124.237	0.00241235	-0.0109861	0.0484547	0.019085	0.104636	-0.0332701	0.021722	0.0200526
882	154.073	141.016	133.609	130.31	141.754	141.376	0.0680909	0.0657253	0.0349028	-0.00979709	0.0743109	0.0407978	0.0456718	0.0128342				145.673	143.762	135.429	131.508	144.084	123.094	0.00982977	-0.00188403	0.0458907	0.0204429	0.142729	-0.0421642	0.0291407	0.0256114
883	153.556	140.229	133.593	129.901	138.869	142.344	0.0645068	0.0597776	0.0347789	-0.012905	0.0524464	0.0479241	0.0410881	0.0115881				146.787	143.21	133.083	131.668	142.699	124.597	0.0175522	-0.00571648	0.0277731	0.0216845	0.131744	-0.0304688	0.0270948	0.0227028
884	155.737	140.39	133.261	129.705	139.237	145.652	0.0796263	0.0609943	0.0322073	-0.0143944	0.0552354	0.0722773	0.0476577	0.0140861				145.901	142.872	133.243	131.465	142.892	124.731	0.0114103	-0.00806315	0.0290087	0.0201093	0.133275	-0.0294261	0.0260523	0.0230918
885	154.478	140.607	133.171	129.561	138.847	147.582	0.0708985	0.0626343	0.0315102	-0.0154886	0.0522797	0.0864858	0.0480533	0.0147656				145.91	141.674	133.866	132.476	141.005	124.422	0.0114727	-0.0163807	0.03382	0.0279542	0.118309	-0.0318306	0.0238908	0.0215335
886	155.99	140.896	132.96	129.093	139.664	144.1	0.0813802	0.0648184	0.0298758	-0.0190449	0.0584715	0.0608516	0.0460588	0.0146888				143.921	143.594	134.543	132.806	139.911	126.325	-0.00231539	-0.00305043	0.0390483	0.0305148	0.109633	-0.0170227	0.0261346	0.0188694
887	155.529	140.561	132.759	128.937	141.873	141.704	0.0781844	0.0622867	0.0283189	-0.0202303	0.0752128	0.0432125	0.0444975	0.0151082				144.641	143.481	134.641	132.934	139.263	127.158	0.00267577	-0.00383497	0.0398052	0.0315081	0.104493	-0.0105408	0.0273511	0.0174552
888	154.318	138.7	134.031	128.714	143.036	141.212	0.0697893	0.0482222	0.0381715	-0.0219248	0.0840268	0.0395904	0.0429792	0.0149201				142.203	140.589	134.016	134.373	137.334	124.657	-0.0142249	-0.0239136	0.0349784	0.0426741	0.0891946	-0.030002	0.0164511	0.0191926
889	152.807	139.653	137.204	128.681	139.561	140.741	0.0593145	0.0554245	0.0627488	-0.0221756	0.0576909	0.036123	0.041521	0.0133021				145.086	138.369	133.465	131.72	138.082	123.546	0.00576059	-0.0393267	0.0307232	0.022088	0.0951269	-0.038647	0.0126208	0.0204928
890	154.114	139.62	134.375	127.358	144.307	139.427	0.0683751	0.0551751	0.040836	-0.0322288	0.0936594	0.0264494	0.0420444	0.0175983				142.365	137.732	133.199	130.132	138.302	123.984	-0.0131018	-0.0437493	0.0286689	0.00976581	0.0968718	-0.0352388	0.00720275	0.0210694
891	152.849	138.763	134.062	128.696	143.97	142.252	0.0596057	0.0486983	0.0384116	-0.0220616	0.0911053	0.0472468	0.0438344	0.015155				141.645	136.963	133.19	130.16	134.515	123.783	-0.018093	-0.0490884	0.0285994	0.00998308	0.0668371	-0.0368028	0.000239225	0.0177726
892	152.812	138.504	134.11	129.794	148.91	144.226	0.0593492	0.0467409	0.0387834	-0.0137181	0.128544	0.0617792	0.0535798	0.0187215				141.942	138.719	131.687	131.224	130.914	124.442	-0.0160342	-0.0368968	0.016992	0.0182392	0.0382776	-0.0316749	-0.0018495	0.0125004
893	151.675	138.004	133.878	130.657	145.487	143.005	0.0514671	0.0429622	0.0369864	-0.0071603	0.102602	0.0527903	0.046608	0.014369				140.126	137.977	132.944	131.099	132.234	122.699	-0.028623	-0.0420483	0.0266996	0.0172693	0.0487465	-0.0452378	-0.00386562	0.0162598
894	150.138	137.657	139.238	129.984	142.896	145.303	0.040812	0.0403398	0.0785037	-0.0122743	0.0829658	0.069708	0.0500092	0.0145412				139.791	135.637	131.682	131.152	132.646	124.719	-0.0309452	-0.0582946	0.0169534	0.0176805	0.0520141	-0.0295195	-0.00535188	0.0166942
895	150.025	136.793	136.584	131.495	144.883	144.097	0.0400287	0.0338101	0.0579464	-0.000792481	0.0980247	0.0608295	0.0483078	0.0134301				138.351	136.216	131.368	131.256	133.156	126.251	-0.0409276	-0.0542747	0.0145285	0.0184875	0.0560589	-0.0175985	-0.00395431	0.0168643
896	149.784	136.002	135.625	131.825	142.074	143.804	0.038358	0.0278321	0.0505182	0.00171513	0.0767361	0.0586725	0.0423053	0.0106355				137.507	136.495	130.972	131.186	133.064	126.289	-0.0467783	-0.0523376	0.0114702	0.0179444	0.0553292	-0.0173028	-0.00527915	0.0169061
897	150.102	136.606	136.53	132.672	147.286	147.743	0.0405624	0.0323968	0.0575281	0.00815134	0.116236	0.0876711	0.057091	0.0160329				137.389	135.175	130.911	130.794	132.83	125.919	-0.0475963	-0.0615022	0.0109991	0.0149026	0.0534734	-0.0201819	-0.00831754	0.0175524
898	149.356	137.698	134.91	132.508	148.06	148.414	0.0353909	0.0406496	0.04498	0.00690513	0.122102	0.0926109	0.0571065	0.0172188				138.435	135.115	130.432	131.123	132.573	130.603	-0.0403453	-0.0619187	0.00729992	0.0174555	0.0514351	0.0162659	-0.00163459	0.0170429
899	149.33	137.124	135.45	132.194	154.928	143.884	0.0352107	0.0363116	0.0491627	0.0045191	0.174153	0.0592615	0.0597697	0.0240848				140.122	136.796	130.132	129.738	133.596	126.647	-0.0286507	-0.0502478	0.00498308	0.00670855	0.0595485	-0.0145171	-0.00369591	0.0153735
900	149.723	137.17	137.757	133.148	149.876	145.379	0.0379351	0.0366593	0.0670322	0.0117684	0.135865	0.0702675	0.0599213	0.0175768				141.278	134.999	129.249	130.82	135.713	130.011	-0.0206371	-0.0627241	-0.00183615	0.0151044	0.0763384	0.0116593	0.00298413	0.0187099
901	149.455	136.799	135.686	132.422	149.532	150.903	0.0360772	0.0338554	0.0509907	0.00625163	0.133258	0.110935	0.0618946	0.0201374				140.031	135.69	130.461	130.369	134.592	129.439	-0.0292815	-0.0579266	0.00752388	0.0116048	0.0674478	0.0072084	0.00109613	0.0173187
902	153.181	136.892	135.119	131.402	144.736	146.764	0.0619072	0.0345583	0.0465989	-0.00149917	0.0969106	0.0804638	0.0531566	0.0142745				139.325	135.29	130.721	131.025	135.087	127.283	-0.0341756	-0.0607037	0.00953181	0.0166951	0.0713736	-0.00956816	-0.00114117	0.0186194
903	151.134	137.032	135.113	129.682	147.429	143.281	0.0477167	0.0356163	0.0465524	-0.0145692	0.11732	0.0548222	0.0479098	0.0172455				140.109	137.146	130.951	129.598	139.796	131.082	-0.0287408	-0.0478178	0.0113081	0.00562221	0.108721	0.0199931	0.0115142	0.0221333
904	150.67	136.974	135.583	129.707	146.564	148.51	0.0445	0.035178	0.0501929	-0.0143792	0.110764	0.0933177	0.0532623	0.0181655				139.989	137.516	131.017	129.76	139.944	131.848	-0.0295727	-0.045249	0.0118178	0.00687926	0.109894	0.0259536	0.0132872	0.0222112
905	149.864	137.656	134.618	127.967	151.847	148.451	0.0389125	0.0403322	0.0427183	-0.0276011	0.150803	0.0928833	0.0563413	0.0245291				139.553	137.861	130.706	129.39	138.425	131.97	-0.0325951	-0.0428537	0.00941597	0.00400822	0.0978473	0.026903	0.0104543	0.020531
906	148.371	137.601	132.198	126.103	149.578	149.621	0.0285625	0.0399165	0.0239735	-0.0417653	0.133607	0.101497	0.0476318	0.0253429				139.033	137.875	131.654	130.283	136.206	135.061	-0.0361998	-0.0427565	0.0167372	0.0109375	0.0802484	0.0509551	0.0133203	0.0195874
907	147.142	137.988	131.58	127.64	159.791	150.591	0.0200426	0.0428413	0.0191867	-0.030086	0.211008	0.108638	0.0619384	0.0350327				139.478	140.199	131.36	130.241	137.885	138.641	-0.033115	-0.0266214	0.0144667	0.0106116	0.0935645	0.0788123	0.0229531	0.0215498
908	146.831	138.4	132.024	126.885	154.464	149.699	0.0178867	0.045955	0.0226258	-0.0358231	0.170636	0.102071	0.0538919	0.0296289				139.815	143.652	130.804	131.184	135.242	138.773	-0.0307789	-0.00264774	0.0101728	0.0179289	0.0726029	0.0798394	0.0245196	0.0177177
909	146.446	137.729	132.43	126.626	150.924	148.522	0.0152177	0.0408839	0.0257705	-0.0377912	0.143808	0.093406	0.0468824	0.025957				139.881	145.437	130.408	129.927	133.167	133.477	-0.0303214	0.00974522	0.00711458	0.0081751	0.0561461	0.0386294	0.0149148	0.0121679
910	147.45	138.014	134.986	126.165	152.142	148.37	0.0221778	0.0430378	0.0455687	-0.0412942	0.153038	0.092287	0.0524693	0.0267989				139.859	142.953	131.48	129.626	132.923	132.772	-0.0304739	-0.00750079	0.0153934	0.00583948	0.054211	0.0331436	0.0117688	0.012196
911	147.263	138.555	135.389	126.377	144.073	155.548	0.0208815	0.0471264	0.0486902	-0.0396833	0.0918859	0.145131	0.0523386	0.0256076				139.844	142.771	131.675	129.885	131.553	137.378	-0.0305778	-0.00876438	0.0168994	0.0078492	0.0433455	0.0689844	0.0162894	0.0146112
912	148.772	138.223	133.13	126.974	140.529	149.313	0.0313424	0.0446173	0.0311926	-0.0351468	0.065027	0.0992293	0.039377	0.0182145				139.825	141.845	130.426	129.37	132.395	134.848	-0.0307096	-0.0151934	0.00725359	0.00385303	0.0500234	0.0492976	0.0107541	0.0135155
913	149.998	137.784	131.128	127.518	147.218	145.751	0.0398415	0.0412996	0.0156856	-0.031013	0.115721	0.0730062	0.0424234	0.0203499				140.24	141.681	130.916	128.844	131.573	133.805	-0.0278327	-0.0163321	0.0110378	-0.000228493	0.0435041	0.0411817	0.00855505	0.0119898
914	149.829	137.358	131.715	128.299	144.949	149.003	0.0386699	0.0380801	0.0202323	-0.0250783	0.0985249	0.0969471	0.0445627	0.0192999				140.607	140.766	131.412	129.395	133.418	135.381	-0.0252886	-0.0226848	0.0148683	0.00404702	0.0581368	0.0534451	0.013754	0.0147114
915	151.908	137.273	130.992	129.792	157.91	147.971	0.0530823	0.0374377	0.0146321	-0.0137333	0.196752	0.0893496	0.0629201	0.0303113				140.432	140.377	131.09	129.201	132.794	133.734	-0.0265017	-0.0253855	0.0123815	0.00254167	0.0531879	0.0406292	0.00947551	0.0134753
916	151.03	137.216	130.861	129.482	147.666	149.871	0.0469957	0.0370069	0.0136175	-0.0160889	0.119116	0.103337	0.0506641	0.0212042				140.873	142.281	130.19	129.211	134.292	137.883	-0.0234446	-0.0121664	0.00543101	0.00261926	0.0650685	0.072914	0.0184036	0.0165854
917	150.375	137.212	131.315	129.554	153.635	146.535	0.042455	0.0369767	0.017134	-0.0155418	0.164353	0.0787779	0.0540259	0.0254362				141.184	143.427	129.944	129.901	134.697	142.46	-0.0212887	-0.00420988	0.0035312	0.00797335	0.0682805	0.108529	0.0271359	0.0204692
918	151.062	136.597	133.218	130.032	146.079	146.768	0.0472175	0.0323288	0.0318742	-0.0119096	0.107089	0.0804932	0.0478488	0.0169731				141.068	142.947	130.453	129.192	134.779	139.867	-0.0220929	-0.00754244	0.0074621	0.00247183	0.0689309	0.0883522	0.0229303	0.0182661
919	150.528	136.688	133.85	129.775	145.804	146.963	0.0435156	0.0330166	0.0367695	-0.0138625	0.105005	0.0819288	0.0477288	0.0169292				140.628	143.417	130.182	129.944	134.817	138.428	-0.025143	-0.00427931	0.00536922	0.00830701	0.0692323	0.0771548	0.0217735	0.0169802
920	149.838	136.574	133.261	130.123	151.887	143.484	0.0387323	0.032155	0.0322073	-0.0112181	0.151106	0.0563167	0.0498832	0.02219				140.735	143.995	130.171	130.72	133.824	135.437	-0.0244013	-0.00026635	0.00528427	0.0143284	0.0613568	0.0538809	0.0183638	0.013507
921	153.064	136.64	132.659	131.255	148.914	144.793	0.0610961	0.0326538	0.0275443	-0.0026162	0.128574	0.0659534	0.052201	0.018345				140.892	143.631	131.293	130.702	133.48	130.488	-0.0233129	-0.00279354	0.0139493	0.0141888	0.0586285	0.015371	0.0126718	0.0110413
922	152.703	136.775	132.556	130.438	159.868	145.865	0.0585935	0.0336741	0.0267465	-0.00882444	0.211591	0.0738454	0.0659378	0.031357				140.621	144.258	129.755	129.429	133.646	128.571	-0.0251915	0.00155962	0.00207159	0.00431084	0.0599451	0.000454197	0.00719163	0.0114648
923	152.403	136.534	133.674	129.488	158.79	151.602	0.0565138	0.0318527	0.0354063	-0.0160433	0.203422	0.116081	0.0712053	0.0317035				140.93	143.097	129.367	130.841	130.869	124.749	-0.0230495	-0.00650102	-0.000924856	0.0152673	0.0379207	-0.0292861	-0.00109557	0.0101586
924	151.699	136.238	133.39	129.403	166.57	143.046	0.0516334	0.0296157	0.0332065	-0.0166892	0.262384	0.0530922	0.0688737	0.0400528				140.983	143.636	129.289	129.662	131.915	126.017	-0.0226821	-0.00275883	-0.00152723	0.00611882	0.0462165	-0.0194193	0.000991307	0.0101144
925	152.601	136.008	133.807	129.443	155.701	144.208	0.0578864	0.0278775	0.0364365	-0.0163853	0.180011	0.0616467	0.0579121	0.0269601				141.941	144.302	129.178	129.526	135.486	125.706	-0.0160411	0.0018651	-0.00238447	0.00506352	0.0745381	-0.0218393	0.00686697	0.0141916
926	151.442	136.277	134.359	129.472	152.267	147.478	0.0498518	0.0299104	0.0407121	-0.0161649	0.153986	0.0857202	0.0573359	0.0235469				140.695	144.395	129.466	131.509	136.871	128.701	-0.0246786	0.00251078	-0.0001603	0.0204507	0.0855225	0.00146577	0.0141852	0.01543
927	153.205	136.158	137.157	129.132	157.626	153.752	0.0620736	0.0290111	0.0623847	-0.0187485	0.1946	0.131909	0.0768716	0.0309579				139.446	144.209	130.48	130.609	135.424	133.348	-0.0333368	0.00121942	0.00767062	0.0134671	0.0740464	0.0376256	0.0167821	0.0147894
928	152.398	135.657	138.077	129.267	151.949	149.457	0.0564792	0.0252248	0.0695108	-0.0177227	0.151576	0.100289	0.0642262	0.0239828				138.555	142.695	130.217	131.959	133.043	137.143	-0.0395134	-0.00929204	0.00563952	0.0239425	0.0551627	0.0671558	0.0171825	0.0163647
929	151.569	135.63	135.641	129.337	153.944	147.414	0.0507322	0.0250207	0.0506422	-0.0171907	0.166695	0.085249	0.0601914	0.0254143				136.365	139.389	129.048	131.221	131.429	133.323	-0.0546949	-0.0322451	-0.00338843	0.018216	0.0423621	0.0374311	0.00128013	0.0158749
930	150.886	135.384	134.872	129.312	160.042	146.506	0.0459974	0.0231616	0.0446857	-0.0173807	0.21291	0.0785644	0.0646564	0.0323375				138.125	140.825	128.74	131.236	130.784	126.383	-0.0424942	-0.0222751	-0.00576705	0.0183324	0.0372466	-0.0165714	-0.00525481	0.0117863
931	150.972	135.279	134.318	129.24	157.51	145.716	0.0465936	0.0223681	0.0403945	-0.0179278	0.193721	0.0727485	0.0596496	0.0294936				138.651	142.922	130.334	129.582	132.65	130.486	-0.0388479	-0.00771601	0.00654309	0.00549806	0.0520458	0.0153555	0.00547974	0.012119
932	152.091	136.45	134.138	129.332	150.838	148.056	0.0543509	0.0312179	0.0390003	-0.0172287	0.143156	0.0899754	0.0567453	0.0223722				138.772	144.235	131.175	128.533	132.973	125.971	-0.0380091	0.00139993	0.013038	-0.00264171	0.0546075	-0.0197773	0.00143621	0.0128897
933	152.759	137.229	134.1	129.907	147.516	147.926	0.0589818	0.0371052	0.038706	-0.0128594	0.117979	0.0890183	0.0548219	0.0185562				138.289	143.21	131.584	128.623	134.989	125.383	-0.0413574	-0.00571648	0.0161966	-0.00194335	0.0705964	-0.0243527	0.00223718	0.0158704
934	154.344	138.53	133.965	130.421	156.072	147.937	0.0699696	0.0469374	0.0376603	-0.00895362	0.182823	0.0890993	0.0695893	0.0263971				139.881	142.751	130.718	129.706	134.105	128.867	-0.0303214	-0.00890324	0.00950864	0.00646024	0.0635854	0.00275747	0.00718119	0.0127437
935	153.98	137.754	134.181	130.845	157.925	147.739	0.0674462	0.0410728	0.0393334	-0.00573172	0.196866	0.0876416	0.0711047	0.0282359				139.908	140.867	129.902	131.17	135.132	130.549	-0.0301342	-0.0219835	0.00320684	0.0178202	0.0717305	0.0158457	0.00941426	0.0148142
936	152.735	138.61	133.615	131.255	158.723	148.175	0.0588154	0.047542	0.0349493	-0.0026162	0.202914	0.0908514	0.072076	0.0289863				140.706	140.436	129.474	130.734	134.486	131.953	-0.0246023	-0.0249759	-9.85172e-05	0.0144371	0.0666071	0.0267707	0.00968968	0.0141743
[truncated: 311 more rows]
